# Supplementary material for: Proteomic Signaling of Dual-Specificity Phosphatase 4 (DUSP4) in Alzheimer’s Disease
Source: Biomolecules. 2024 Jan 3;14(1):66. doi: 10.3390/biom14010066 (PMC10813059; doi:10.3390/biom14010066)
Supplement: Supplementary file 1 [file biomolecules-14-00066-s001.zip]

Archive with 6 entries (6 files):
- biomolecules-2751138-original-images.pdf
- Supplementary.dataS1.xlsx
- Supplementary.dataS2.xlsx
- Supplementary.dataS3.xlsx
- Supplementary.dataS4.xlsx
- Supplementary.information03.pdf
