# Supplementary material for: Proteomic Signaling of Dual-Specificity Phosphatase 4 (DUSP4) in Alzheimer’s Disease
Source: Biomolecules. 2024 Jan 3;14(1):66. doi: 10.3390/biom14010066 (PMC10813059; doi:10.3390/biom14010066)
Supplement: Supplementary file 1 [file biomolecules-14-00066-s001.zip › Supplementary.dataS2.xlsx]

## Sheet: Supplementary DataS2A_female
Supplementary DataS2A Analysis of differentially expressed proteins (DEP) in 5xFADvsWT in female mouse
Protein.IDs	Protein.names	Gene.names	logFC	t	P.Value	adj.P.Val
P08226;Q8VHG0;CON__Q03247	Apolipoprotein E	Apoe	2.35066	9.02636	2.81953e-11	5.06025e-08
P12023	Amyloid beta A4 protein;N-APP;Soluble APP-alpha;Soluble APP-beta;C99;Beta-amyloid protein 42;Beta-amyloid protein 40;C83;P3(42);P3(40);C80;Gamma-secretase C-terminal fragment 59;Gamma-secretase C-terminal fragment 57;Gamma-secretase C-terminal fragment 50;C31	App	2.32774	9.02541	2.82774e-11	5.06025e-08
P20060	Beta-hexosaminidase subunit beta	Hexb	1.50806	8.69875	7.70136e-11	6.89079e-08
Q9R118	Serine protease HTRA1	Htra1	2.38298	8.71467	7.33225e-11	6.89079e-08
P21460	Cystatin-C	Cst3	0.926567	7.64008	2.14547e-09	1.53573e-06
Q06890	Clusterin;Clusterin beta chain;Clusterin alpha chain	Clu	1.63212	7.47703	3.61582e-09	2.15684e-06
Q9DAW9	Calponin-3	Cnn3	1.10434	6.87184	2.55316e-08	1.30539e-05
P03995;Q99M73;Q9Z2T6;Q6IMF0;CON__Q6KB66-1;CON__Q61726;CON__Q6NT21;CON__P78385;CON__P78386;CON__P19013;CON__P12035	Glial fibrillary acidic protein	Gfap	1.8728	6.80664	3.15572e-08	1.41179e-05
P14069	Protein S100-A6	S100a6	2.10614	6.35166	1.39121e-07	4.97914e-05
Q9ER58	Testican-2	Spock2	1.68638	6.35493	1.37643e-07	4.97914e-05
O89051	Integral membrane protein 2B;BRI2, membrane form;BRI2 intracellular domain;BRI2C, soluble form;Bri23 peptide	Itm2b	1.28841	6.1227	2.9405e-07	8.77004e-05
P13020;CON__Q3SX14	Gelsolin	Gsn	0.715031	6.12698	2.89965e-07	8.77004e-05
Q8VCC9	Spondin-1	Spon1	0.973582	6.05979	3.61203e-07	9.9442e-05
P28798	Granulins;Acrogranin;Granulin-1;Granulin-2;Granulin-3;Granulin-4;Granulin-5;Granulin-6;Granulin-7	Grn	1.65769	5.86028	6.93387e-07	0.000165442
Q61233	Plastin-2	Lcp1	2.01187	5.863	6.87253e-07	0.000165442
Q61220	Protein kinase C-binding protein NELL2	Nell2	0.844298	5.73721	1.03638e-06	0.000231826
P40240	CD9 antigen	Cd9	0.79617	5.61204	1.55892e-06	0.000328198
P14106	Complement C1q subcomponent subunit B	C1qb	1.88829	5.52642	2.06039e-06	0.000409674
O70443	Guanine nucleotide-binding protein G(z) subunit alpha	Gnaz	-0.387813	-5.49367	2.29207e-06	0.000431754
Q8CAY6	Acetyl-CoA acetyltransferase, cytosolic	Acat2	0.690125	5.34307	3.73858e-06	0.000669019
Q9WUU7	Cathepsin Z	Ctsz	2.16485	5.27315	4.68957e-06	0.000799237
P29416	Beta-hexosaminidase subunit alpha	Hexa	1.4668	5.17572	6.42654e-06	0.00104548
P42227	Signal transducer and activator of transcription 3	Stat3	0.946483	5.11145	7.90784e-06	0.00123053
P32037	Solute carrier family 2, facilitated glucose transporter member 3	Slc2a3	-0.372256	-5.0737	8.93049e-06	0.00133176
Q9JHS3	Ragulator complex protein LAMTOR2	Lamtor2	0.861451	4.93368	1.4003e-05	0.00200467
Q68FD5	Clathrin heavy chain 1	Cltc	-0.246511	-4.92052	1.46063e-05	0.00201061
P05555	Integrin alpha-M	Itgam	1.51242	4.86147	1.76432e-05	0.002131
P17047	Lysosome-associated membrane glycoprotein 2	Lamp2	0.646627	4.8576	1.78626e-05	0.002131
Q64444	Carbonic anhydrase 4	Ca4	-0.557366	-4.87594	1.6846e-05	0.002131
Q91VK4	Integral membrane protein 2C;CT-BRI3	Itm2c	1.40119	4.86998	1.717e-05	0.002131
Q02105	Complement C1q subcomponent subunit C	C1qc	1.69363	4.8229	1.99551e-05	0.00230385
Q62420	Endophilin-A1	Sh3gl2	-0.278334	-4.8022	2.13172e-05	0.00234911
Q9Z1Q5	Chloride intracellular channel protein 1	Clic1	0.959153	4.79719	2.16599e-05	0.00234911
P99029	Peroxiredoxin-5, mitochondrial	Prdx5	-0.324812	-4.73493	2.64065e-05	0.00277967
P98086	Complement C1q subcomponent subunit A	C1qa	1.70002	4.68376	3.10627e-05	0.00316957
Q9DBG3	AP-2 complex subunit beta	Ap2b1	-0.216206	-4.67555	3.18817e-05	0.00316957
Q8CAA7	Glucose 1,6-bisphosphate synthase	Pgm2l1	-0.343598	-4.65638	3.38775e-05	0.00327696
Q8BPN8	DmX-like protein 2	Dmxl2	-0.215846	-4.6224	3.77216e-05	0.00355278
P52760	Ribonuclease UK114	Hrsp12	0.723059	4.60087	4.03755e-05	0.00370523
P24452	Macrophage-capping protein	Capg	1.12905	4.57183	4.42489e-05	0.00386875
Q8VBY2	Calcium/calmodulin-dependent protein kinase kinase 1	Camkk1	-0.402266	-4.57133	4.43192e-05	0.00386875
P01831	Thy-1 membrane glycoprotein	Thy1	-0.372358	-4.53852	4.91428e-05	0.00418767
Q80ZJ1	Ras-related protein Rap-2a	Rap2a	-0.4316	-4.52341	5.15336e-05	0.00428927
P19096	Fatty acid synthase;[Acyl-carrier-protein] S-acetyltransferase;[Acyl-carrier-protein] S-malonyltransferase;3-oxoacyl-[acyl-carrier-protein] synthase;3-oxoacyl-[acyl-carrier-protein] reductase;3-hydroxyacyl-[acyl-carrier-protein] dehydratase;Enoyl-[acyl-carrier-protein] reductase;Oleoyl-[acyl-carrier-protein] hydrolase	Fasn	0.339382	4.48474	5.81873e-05	0.00473301
Q920E5	Farnesyl pyrophosphate synthase	Fdps	0.787091	4.42952	6.91718e-05	0.00550146
Q3UGY8	Brefeldin A-inhibited guanine nucleotide-exchange protein 3	Arfgef3	0.965849	4.40101	7.56134e-05	0.00588305
Q8BTJ4	Bis(5-adenosyl)-triphosphatase enpp4	Enpp4	0.730623	4.35529	8.71896e-05	0.00663939
P18242	Cathepsin D	Ctsd	0.593577	4.34275	9.0659e-05	0.00675976
P35802	Neuronal membrane glycoprotein M6-a	Gpm6a	-0.545914	-4.32942	9.44927e-05	0.00690182
Q9Z0P4	Paralemmin-1	Palm	-0.295568	-4.30421	0.000102184	0.00731433
Q8R3V5	Endophilin-B2	Sh3glb2	-0.290116	-4.27683	0.000111229	0.00757496
Q91YT0	NADH dehydrogenase [ubiquinone] flavoprotein 1, mitochondrial	Ndufv1	-0.261707	-4.2741	0.000112175	0.00757496
Q9CZX7	Type 2 phosphatidylinositol 4,5-bisphosphate 4-phosphatase	Tmem55a	1.05565	4.2809	0.000109836	0.00757496
Q9Z2Y3	Homer protein homolog 1	Homer1	-0.293023	-4.25964	0.000117304	0.00777468
Q60648	Ganglioside GM2 activator	Gm2a	0.867604	4.24455	0.000122905	0.00796798
Q8BIK4	Dedicator of cytokinesis protein 9	Dock9	0.624938	4.23992	0.000124674	0.00796798
Q9WV32	Actin-related protein 2/3 complex subunit 1B	Arpc1b	1.23053	4.23189	0.000127803	0.00802469
P70414	Sodium/calcium exchanger 1	Slc8a1	-0.492837	-4.2142	0.000134967	0.00827303
Q8VCW8	Acyl-CoA synthetase family member 2, mitochondrial	Acsf2	0.428652	4.21081	0.000136381	0.00827303
E9Q3L2		Pi4ka	-0.326812	-4.17864	0.000150575	0.00883458
Q7TME0	Lipid phosphate phosphatase-related protein type 4	Lppr4	-0.315341	-4.1791	0.000150364	0.00883458
O55143;Q8R429;Q64518	Sarcoplasmic/endoplasmic reticulum calcium ATPase 2	Atp2a2	-0.199913	-4.13874	0.000170188	0.00973153
Q9Z1G3	V-type proton ATPase subunit C 1	Atp6v1c1	-0.236497	-4.13661	0.000171301	0.00973153
Q61599	Rho GDP-dissociation inhibitor 2	Arhgdib	0.840081	4.12328	0.00017844	0.00982519
Q9R1J0	Sterol-4-alpha-carboxylate 3-dehydrogenase, decarboxylating	Nsdhl	0.987289	4.12335	0.0001784	0.00982519
P07091	Protein S100-A4	S100a4	2.6151	4.11666	0.000182088	0.00987414
O89017	Legumain	Lgmn	0.694725	4.07937	0.000204059	0.0109004
Q6NXK7	Inactive dipeptidyl peptidase 10	Dpp10	-0.53597	-4.06794	0.000211291	0.0111208
Q80TE7	Leucine-rich repeat-containing protein 7	Lrrc7	-0.303014	-4.05736	0.000218213	0.0113186
Q60766	Immunity-related GTPase family M protein 1	Irgm1	2.95733	4.04242	0.00022836	0.0116757
O08709	Peroxiredoxin-6	Prdx6	0.48612	4.02478	0.000240929	0.0121449
Q61644	Protein kinase C and casein kinase substrate in neurons protein 1	Pacsin1	-0.266508	-4.00416	0.000256484	0.0125747
Q8BP92	Reticulocalbin-2	Rcn2	0.477938	4.0056	0.000255363	0.0125747
P06797	Cathepsin L1;Cathepsin L1 heavy chain;Cathepsin L1 light chain	Ctsl	0.642939	3.97626	0.000279087	0.013498
P51881	ADP/ATP translocase 2;ADP/ATP translocase 2, N-terminally processed	Slc25a5	-0.270907	-3.96061	0.000292602	0.013963
P11835	Integrin beta-2	Itgb2	1.17103	3.94553	0.00030622	0.0142588
P63011	Ras-related protein Rab-3A	Rab3a	-0.281989	-3.94494	0.00030677	0.0142588
Q91W86	Vacuolar protein sorting-associated protein 11 homolog	Vps11	0.499647	3.90034	0.000350833	0.0158941
Q9EQG7	Ectonucleotide pyrophosphatase/phosphodiesterase family member 5	Enpp5	0.886908	3.90075	0.0003504	0.0158941
P21279	Guanine nucleotide-binding protein G(q) subunit alpha	Gnaq	-0.263681	-3.88843	0.000363596	0.0160656
Q61207	Prosaposin	Psap	0.401809	3.88845	0.000363577	0.0160656
P48318	Glutamate decarboxylase 1	Gad1	-0.447907	-3.88179	0.000370913	0.016189
P17426	AP-2 complex subunit alpha-1	Ap2a1	-0.244208	-3.85481	0.000402113	0.0170739
P17427	AP-2 complex subunit alpha-2	Ap2a2	-0.197031	-3.85201	0.0004055	0.0170739
Q8BKX1	Brain-specific angiogenesis inhibitor 1-associated protein 2	Baiap2	-0.249894	-3.85898	0.000397128	0.0170739
Q9JKK7;Q9JHJ0	Tropomodulin-2	Tmod2	-0.273935	-3.82888	0.000434492	0.0180819
P26039	Talin-1	Tln1	0.594322	3.81525	0.000452517	0.0186156
O54901	OX-2 membrane glycoprotein	Cd200	-0.366196	-3.79005	0.000487745	0.0196139
O88844	Isocitrate dehydrogenase [NADP] cytoplasmic	Idh1	0.311216	3.79072	0.000486771	0.0196139
P97371	Proteasome activator complex subunit 1	Psme1	0.668219	3.76786	0.000520954	0.0203644
Q64331	Unconventional myosin-VI	Myo6	0.551177	3.76721	0.000521964	0.0203644
Q99KX1	Myeloid leukemia factor 2	Mlf2	-0.364727	-3.76623	0.000523476	0.0203644
Q9D6J6	NADH dehydrogenase [ubiquinone] flavoprotein 2, mitochondrial	Ndufv2	-0.236801	-3.76023	0.000532872	0.020507
Q9DBG5	Perilipin-3	Plin3	0.615758	3.75587	0.000539789	0.0205522
Q61548	Clathrin coat assembly protein AP180	Snap91	-0.245962	-3.74975	0.000549668	0.020708
Q8C729	Protein FAM126B	Fam126b	-0.337073	-3.74032	0.000565205	0.0210715
P26041	Moesin	Msn	0.828249	3.73308	0.000577445	0.0213059
P15508	Spectrin beta chain, erythrocytic	Sptb	-0.282104	-3.7208	0.00059875	0.0218666
Q9JJK2	LanC-like protein 2	Lancl2	-0.316895	-3.7117	0.00061504	0.0222346
Q9CS84;P0DI97	Neurexin-1	Nrxn1	0.346088	3.70674	0.000624101	0.0223366
P62743	AP-2 complex subunit sigma	Ap2s1	-0.303937	-3.69169	0.000652373	0.0229062
Q9R0N7	Synaptotagmin-7	Syt7	-0.308453	-3.69146	0.000652816	0.0229062
Q3THS6	S-adenosylmethionine synthase isoform type-2	Mat2a	-0.329964	-3.67861	0.000677957	0.023533
Q61411	GTPase HRas;GTPase HRas, N-terminally processed	Hras	-0.31986	-3.67567	0.000683831	0.023533
O35639	Annexin A3	Anxa3	1.17793	3.66656	0.000702363	0.0239406
Q9CPU2	NADH dehydrogenase [ubiquinone] 1 beta subcomplex subunit 2, mitochondrial	Ndufb2	-0.460111	-3.64966	0.000738031	0.024919
P48962	ADP/ATP translocase 1	Slc25a4	-0.257912	-3.64356	0.00075133	0.0251309
P48036	Annexin A5	Anxa5	0.438501	3.63077	0.000779958	0.0256098
P51830	Adenylate cyclase type 9	Adcy9	-0.313502	-3.63297	0.000774952	0.0256098
Q62108	Disks large homolog 4	Dlg4	-0.236335	-3.61909	0.000807017	0.0260208
Q9R0P9	Ubiquitin carboxyl-terminal hydrolase isozyme L1	Uchl1	-0.267173	-3.62212	0.000799917	0.0260208
P53986	Monocarboxylate transporter 1	Slc16a1	0.618679	3.61508	0.000816533	0.0260926
Q06335	Amyloid-like protein 2	Aplp2	0.821237	3.61012	0.000828414	0.026238
P13707	Glycerol-3-phosphate dehydrogenase [NAD(+)], cytoplasmic	Gpd1	-0.363064	-3.60356	0.000844406	0.0265099
P31786	Acyl-CoA-binding protein	Dbi	0.497563	3.59494	0.000865887	0.0269479
Q3TES0	IQ motif and SEC7 domain-containing protein 3	Iqsec3	-0.758885	-3.5908	0.000876386	0.0270395
Q9CPP6	NADH dehydrogenase [ubiquinone] 1 alpha subcomplex subunit 5	Ndufa5	-0.347702	-3.55822	0.000963333	0.0294551
Q9JIA1	Leucine-rich glioma-inactivated protein 1	Lgi1	-0.247478	-3.55544	0.000971139	0.0294551
Q5DU25	IQ motif and SEC7 domain-containing protein 2	Iqsec2	-0.250565	-3.54889	0.000989723	0.0297666
P47802	Metaxin-1	Mtx1	-0.476759	-3.53594	0.00102752	0.0301433
Q08274	Dystrophia myotonica WD repeat-containing protein	Dmwd	-0.441666	-3.53688	0.00102471	0.0301433
Q9JK42	[Pyruvate dehydrogenase (acetyl-transferring)] kinase isozyme 2, mitochondrial	Pdk2	-0.536749	-3.53855	0.00101977	0.0301433
Q9CRB0	Sorting nexin-24	Snx24	0.874689	3.51657	0.00108663	0.0316184
P01887	Beta-2-microglobulin	B2m	2.86158	3.50187	0.00113365	0.0316979
P20152;P15331	Vimentin	Vim	1.07479	3.50378	0.00112743	0.0316979
P46460	Vesicle-fusing ATPase	Nsf	-0.194469	-3.5042	0.00112606	0.0316979
Q8K010	5-oxoprolinase	Oplah	0.466499	3.50522	0.00112274	0.0316979
Q99L04	Dehydrogenase/reductase SDR family member 1	Dhrs1	0.649405	3.50844	0.00111238	0.0316979
Q9WUC3	Lymphocyte antigen 6H	Ly6h	-0.457929	-3.49032	0.00117195	0.0325148
Q3TMH2	Secernin-3	Scrn3	-0.69798	-3.48594	0.00118681	0.0326738
Q62277	Synaptophysin	Syp	-0.340482	-3.47875	0.00121157	0.0331009
P01899;P01897;P01896;P01898	H-2 class I histocompatibility antigen, D-B alpha chain;H-2 class I histocompatibility antigen, L-D alpha chain;H-2 class I histocompatibility antigen, alpha chain	H2-D1;H2-L	2.58472	3.47011	0.00124199	0.0334217
Q9JMF3	Guanine nucleotide-binding protein G(I)/G(S)/G(O) subunit gamma-13	Gng13	-0.882025	-3.47258	0.0012332	0.0334217
P29788	Vitronectin	Vtn	1.35925	3.46431	0.00126282	0.0334788
Q14BI2	Metabotropic glutamate receptor 2	Grm2	-0.487205	-3.46506	0.00126008	0.0334788
O35405	Phospholipase D3	Pld3	0.420264	3.45799	0.00128589	0.0338397
Q3TDK6	Protein rogdi homolog	Rogdi	-0.258782	-3.44547	0.0013328	0.0345444
Q3UTH8;Q5DU57	Rho guanine nucleotide exchange factor 9	Arhgef9	-0.543341	-3.44812	0.00132273	0.0345444
Q8BG39;Q69ZS6	Synaptic vesicle glycoprotein 2B	Sv2b	-0.271165	-3.4408	0.00135071	0.0345444
Q9CR98	Protein FAM136A	Fam136a	-0.380212	-3.44065	0.00135127	0.0345444
Q9DC69	NADH dehydrogenase [ubiquinone] 1 alpha subcomplex subunit 9, mitochondrial	Ndufa9	-0.248275	-3.43424	0.00137623	0.0349328
P84091	AP-2 complex subunit mu	Ap2m1	-0.232161	-3.42871	0.00139813	0.0349924
Q03157	Amyloid-like protein 1;C30	Aplp1	0.599504	3.43064	0.00139047	0.0349924
Q9Z2Q6	Septin-5	2023-09-05	-0.252102	-3.41702	0.00144552	0.0359271
P31324	cAMP-dependent protein kinase type II-beta regulatory subunit	Prkar2b	-0.262495	-3.40758	0.00148493	0.0366521
Q9D6J5	NADH dehydrogenase [ubiquinone] 1 beta subcomplex subunit 8, mitochondrial	Ndufb8	-0.229384	-3.39192	0.0015525	0.0380576
Q7TQI3	Ubiquitin thioesterase OTUB1	Otub1	-0.240479	-3.38071	0.00160271	0.0388899
Q8R0S4	Voltage-dependent L-type calcium channel subunit beta-4	Cacnb4	-0.321118	-3.3795	0.00160819	0.0388899
P53810	Phosphatidylinositol transfer protein alpha isoform	Pitpna	-0.228087	-3.37281	0.00163899	0.0393688
P18872	Guanine nucleotide-binding protein G(o) subunit alpha	Gnao1	-0.209792	-3.35214	0.0017377	0.0403846
Q3UHJ0;Q91Z96	AP2-associated protein kinase 1	Aak1	-0.211357	-3.35777	0.00171027	0.0403846
Q8CC86	Nicotinate phosphoribosyltransferase	Naprt	0.612141	3.35338	0.0017316	0.0403846
Q8R071	Inositol-trisphosphate 3-kinase A	Itpka	-0.4059	-3.35425	0.00172739	0.0403846
Q9JKP5	Muscleblind-like protein 1	Mbnl1	0.571348	3.36012	0.00169895	0.0403846
Q91VM5	RNA binding motif protein, X-linked-like-1	Rbmxl1	-0.671688	-3.3454	0.00177111	0.0408956
Q3UHL1	CaM kinase-like vesicle-associated protein	Camkv	-0.229747	-3.33587	0.00181934	0.0412646
Q64514	Tripeptidyl-peptidase 2	Tpp2	-0.274185	-3.33542	0.00182168	0.0412646
Q7TPD3	Roundabout homolog 2	Robo2	-0.473731	-3.33902	0.00180327	0.0412646
Q91V64	Isochorismatase domain-containing protein 1	Isoc1	0.755247	3.3213	0.00189559	0.0426686
Q8CFI5	Probable proline--tRNA ligase, mitochondrial	Pars2	-0.561084	-3.28931	0.00207369	0.0463859
O88653	Ragulator complex protein LAMTOR3	Lamtor3	0.699754	3.28128	0.00212082	0.0468545
Q8CEC5	NF-kappa-B inhibitor-interacting Ras-like protein 1	Nkiras1	-0.567692	-3.28253	0.00211342	0.0468545
Q91V61	Sideroflexin-3	Sfxn3	-0.261283	-3.27405	0.00216418	0.0472292
Q9JI19	Acidic fibroblast growth factor intracellular-binding protein	Fibp	-0.480615	-3.27465	0.00216056	0.0472292
Q6ZQ18	Protein EFR3 homolog B	Efr3b	-0.387497	-3.26402	0.00222568	0.0482769
Q9R0K7	Plasma membrane calcium-transporting ATPase 2	Atp2b2	-0.209926	-3.2509	0.0023086	0.0497741
P37040	NADPH--cytochrome P450 reductase	Por	0.337078	3.24005	0.00237944	0.0507477
Q91VD9	NADH-ubiquinone oxidoreductase 75 kDa subunit, mitochondrial	Ndufs1	-0.171164	-3.23964	0.00238212	0.0507477
Q8R1S0	Ubiquinone biosynthesis monooxygenase COQ6, mitochondrial	Coq6	-0.577881	-3.23649	0.00240311	0.0508918
P24668	Cation-dependent mannose-6-phosphate receptor	M6pr	0.320317	3.22668	0.00246954	0.0510895
P29351	Tyrosine-protein phosphatase non-receptor type 6	Ptpn6	0.915323	3.22975	0.00244854	0.0510895
Q2PFD7	PH and SEC7 domain-containing protein 3	Psd3	-0.286504	-3.22839	0.00245784	0.0510895
Q3UHD9	Arf-GAP with GTPase, ANK repeat and PH domain-containing protein 2	Agap2	-0.228548	-3.22716	0.0024662	0.0510895
P59281	Rho GTPase-activating protein 39	Arhgap39	-0.454276	-3.20801	0.00260074	0.0528866
Q8VEH3	ADP-ribosylation factor-like protein 8A	Arl8a	0.468571	3.21127	0.00257737	0.0528866
Q9ESN6	Tripartite motif-containing protein 2	Trim2	-0.176121	-3.20848	0.00259735	0.0528866
O88737	Protein bassoon	Bsn	-0.211681	-3.20558	0.00261833	0.0529436
O35988	Syndecan-4	Sdc4	0.635886	3.20199	0.00264443	0.0531709
F6SEU4	Ras/Rap GTPase-activating protein SynGAP	Syngap1	-0.18784	-3.19646	0.0026852	0.0533908
Q62421	Endophilin-A3	Sh3gl3	-0.400907	-3.19681	0.00268263	0.0533908
P17225;Q8BHD7	Polypyrimidine tract-binding protein 1	Ptbp1	0.772937	3.1872	0.00275479	0.0544719
P62761	Visinin-like protein 1	Vsnl1	-0.224333	-3.18011	0.00280921	0.0552426
Q9EPL2	Calsyntenin-1;Soluble Alc-alpha;CTF1-alpha	Clstn1	0.529821	3.17441	0.00285375	0.0558119
Q8BGX0	E3 ubiquitin-protein ligase TRIM23	Trim23	-0.507743	-3.16784	0.00290583	0.0565216
Q9QXS6	Drebrin	Dbn1	-0.171205	-3.16548	0.00292482	0.0565834
P09411	Phosphoglycerate kinase 1	Pgk1	-0.145939	-3.15722	0.00299203	0.0570186
Q8CBY8	Dynactin subunit 4	Dctn4	0.271173	3.15967	0.00297196	0.0570186
Q8R0Y6	Cytosolic 10-formyltetrahydrofolate dehydrogenase	Aldh1l1	0.27511	3.15684	0.00299511	0.0570186
P83917	Chromobox protein homolog 1	Cbx1	0.678687	3.13983	0.00313833	0.059429
P50153	Guanine nucleotide-binding protein G(I)/G(S)/G(O) subunit gamma-4	Gng4	-0.570169	-3.1344	0.00318542	0.0600032
B1AWN6;A2ASI5;A2APX8;Q62205;Q9JJV9;Q6QIY3	Sodium channel protein	Scn2a1	-0.293951	-3.12368	0.00328027	0.0605159
P27661	Histone H2AX	H2afx	0.780324	3.12736	0.0032474	0.0605159
P46096	Synaptotagmin-1	Syt1	-0.173895	-3.12832	0.00323885	0.0605159
Q8BGZ1	Hippocalcin-like protein 4	Hpcal4	-0.187512	-3.12519	0.00326674	0.0605159
P84075	Neuron-specific calcium-binding protein hippocalcin	Hpca	-0.312188	-3.12055	0.00330841	0.0607221
Q8JZQ9	Eukaryotic translation initiation factor 3 subunit B	Eif3b	0.377876	3.11318	0.00337574	0.0616418
Q8BJH1	Zinc finger C2HC domain-containing protein 1A	Zc2hc1a	-0.583071	-3.10717	0.00343153	0.0623424
P56382	ATP synthase subunit epsilon, mitochondrial	Atp5e	-0.799456	-3.10043	0.00349522	0.0628613
Q9QYS2	Metabotropic glutamate receptor 3	Grm3	-0.309277	-3.10054	0.00349414	0.0628613
Q8BNI4	Derlin-2	Derl2	0.560957	3.09825	0.00351607	0.0629202
O70161;P70181	Phosphatidylinositol 4-phosphate 5-kinase type-1 gamma	Pip5k1c	-0.270016	-3.09512	0.00354617	0.0631429
O09044	Synaptosomal-associated protein 23	Snap23	0.705531	3.09187	0.00357763	0.0633878
P55258	Ras-related protein Rab-8A	Rab8a	-0.475306	-3.08723	0.00362313	0.0637904
Q3UMR5	Calcium uniporter protein, mitochondrial	Mcu	-0.284143	-3.08019	0.00369308	0.0637904
Q6IRU5	Clathrin light chain B	Cltb	-0.318587	-3.08303	0.0036647	0.0637904
Q8BL65	Actin-binding LIM protein 2	Ablim2	-0.268864	-3.07878	0.00370729	0.0637904
Q99LD8	N(G),N(G)-dimethylarginine dimethylaminohydrolase 2	Ddah2	0.386343	3.08042	0.00369076	0.0637904
Q9DC07	LIM zinc-binding domain-containing Nebulette	Nebl	-0.266936	-3.08351	0.00365994	0.0637904
P17156	Heat shock-related 70 kDa protein 2	Hspa2	0.165496	3.0732	0.00376384	0.0644536
Q8CHC4	Synaptojanin-1	Synj1	-0.171267	-3.06399	0.00385908	0.0657697
Q5U3K5	Rab-like protein 6	Rabl6	-0.363253	-3.06066	0.00389408	0.0660516
Q922F4;CON__ENSEMBL:ENSBTAP00000025008	Tubulin beta-6 chain	Tubb6	2.82167	3.0564	0.00393925	0.0665027
P29533	Vascular cell adhesion protein 1	Vcam1	0.453482	3.04555	0.0040565	0.0681607
Q99104	Unconventional myosin-Va	Myo5a	-0.169141	-3.03564	0.00416649	0.0696816
B2RUR8;Q8R554	OTU domain-containing protein 7B	Otud7b	0.542518	3.02974	0.00423336	0.0703069
P97441	Zinc transporter 3	Slc30a3	-0.49105	-3.02888	0.00424317	0.0703069
Q8BXZ1	Protein disulfide-isomerase TMX3	Tmx3	0.371559	3.02688	0.00426604	0.0703602
P60487	Pyridoxal phosphate phosphatase	Pdxp	-0.217723	-3.02178	0.00432509	0.0703614
Q8R0A7	Uncharacterized protein KIAA0513	Kiaa0513	-0.301643	-3.02324	0.00430807	0.0703614
Q8VHK5	Membrane protein MLC1	Mlc1	0.376692	3.02483	0.00428966	0.0703614
Q9WVA4	Transgelin-2	Tagln2	0.717187	3.01462	0.00440919	0.071405
P35564	Calnexin	Canx	0.198988	3.00106	0.00457273	0.0733892
Q9QY76	Vesicle-associated membrane protein-associated protein B	Vapb	-0.273158	-3.00232	0.0045573	0.0733892
Q6PHN9	Ras-related protein Rab-35	Rab35	-0.424223	-2.99453	0.00465349	0.074314
Q8C9S4	Coiled-coil domain-containing protein 186	Ccdc186	-0.484213	-2.99306	0.00467188	0.074314
Q03265;REV__P54729	ATP synthase subunit alpha, mitochondrial	Atp5a1	-0.194335	-2.98236	0.00480765	0.075986
Q9CQW2	ADP-ribosylation factor-like protein 8B	Arl8b	0.34371	2.98144	0.00481945	0.075986
P97300	Neuroplastin	Nptn	-0.24318	-2.97582	0.00489242	0.0764195
Q62433	Protein NDRG1	Ndrg1	0.472591	2.9744	0.004911	0.0764195
Q6NS52	Diacylglycerol kinase beta	Dgkb	-0.393035	-2.97527	0.0048995	0.0764195
O35678	Monoglyceride lipase	Mgll	-0.362691	-2.9642	0.00504648	0.0771852
Q64345	Interferon-induced protein with tetratricopeptide repeats 3	Ifit3	1.73171	2.9674	0.00500355	0.0771852
Q9D8B7	Junctional adhesion molecule C	Jam3	0.391645	2.96543	0.00502992	0.0771852
Q9WTM5	RuvB-like 2	Ruvbl2	0.302983	2.96558	0.00502795	0.0771852
Q9D2G2	Dihydrolipoyllysine-residue succinyltransferase component of 2-oxoglutarate dehydrogenase complex, mitochondrial	Dlst	-0.209835	-2.96034	0.00509864	0.0773222
Q9QWI6	SRC kinase signaling inhibitor 1	Srcin1	-0.195138	-2.96067	0.00509425	0.0773222
Q9D832	DnaJ homolog subfamily B member 4	Dnajb4	-0.353922	-2.95549	0.00516493	0.077997
P52800	Ephrin-B2	Efnb2	-0.568941	-2.95174	0.00521673	0.0784482
Q4ACU6	SH3 and multiple ankyrin repeat domains protein 3	Shank3	-0.213852	-2.94951	0.00524779	0.0785852
P43275	Histone H1.1	Hist1h1a	0.475921	2.92309	0.00562899	0.0831785
P70663	SPARC-like protein 1	Sparcl1	0.350556	2.92185	0.00564749	0.0831785
Q8R3P0	Aspartoacylase	Aspa	0.426757	2.92564	0.005591	0.0831785
Q9CPY7	Cytosol aminopeptidase	Lap3	0.39395	2.92425	0.00561162	0.0831785
Q8BVE3	V-type proton ATPase subunit H	Atp6v1h	-0.197907	-2.90869	0.00584741	0.08577
Q64373	Bcl-2-like protein 1	Bcl2l1	-0.359347	-2.90433	0.00591523	0.0864106
P01029;CON__P01030	Complement C4-B;Complement C4 beta chain;Complement C4 alpha chain;C4a anaphylatoxin;Complement C4 gamma chain	C4b	1.55238	2.89895	0.00599968	0.087288
E9Q401	Ryanodine receptor 2	Ryr2	-0.20784	-2.89623	0.00604282	0.0875597
Q920M7	Synaptotagmin-17	Syt17	-0.544879	-2.88925	0.00615501	0.0888257
Q7SIG6	Arf-GAP with SH3 domain, ANK repeat and PH domain-containing protein 2	Asap2	-0.623154	-2.88449	0.0062325	0.0895829
Q91V09	WD repeat-containing protein 13	Wdr13	-0.230684	-2.8806	0.00629667	0.089965
Q91YJ2	Sorting nexin-4	Snx4	-0.276704	-2.87983	0.00630936	0.089965
Q8VDZ4	Palmitoyltransferase ZDHHC5	Zdhhc5	-0.400296	-2.87666	0.00636217	0.090358
O35239	Tyrosine-protein phosphatase non-receptor type 9	Ptpn9	-0.544375	-2.86762	0.00651489	0.0904346
P10605	Cathepsin B;Cathepsin B light chain;Cathepsin B heavy chain	Ctsb	0.348356	2.86737	0.00651918	0.0904346
P11438	Lysosome-associated membrane glycoprotein 1	Lamp1	0.87213	2.87224	0.00643644	0.0904346
P56873	Sjoegren syndrome/scleroderma autoantigen 1 homolog	Sssca1	-0.457343	-2.87094	0.00645838	0.0904346
Q8K0T0	Reticulon-1	Rtn1	-0.191308	-2.87343	0.00641633	0.0904346
Q922R8	Protein disulfide-isomerase A6	Pdia6	0.26471	2.8697	0.00647953	0.0904346
Q8BLJ3	PI-PLC X domain-containing protein 3	Plcxd3	-0.691831	-2.85978	0.0066501	0.0918947
Q62418	Drebrin-like protein	Dbnl	-0.210828	-2.85208	0.0067856	0.0930485
Q9EQC5	N-terminal kinase-like protein	Scyl1	0.497019	2.85278	0.00677307	0.0930485
Q14C51	Pentatricopeptide repeat domain-containing protein 3, mitochondrial	Ptcd3	0.509466	2.84512	0.00691004	0.0943932
P61255	60S ribosomal protein L26	Rpl26	-0.569995	-2.84057	0.00699262	0.0951582
Q62288;Q8BKV0	Testican-1	Spock1	0.843417	2.83342	0.00712436	0.0965837
O08919	Numb-like protein	Numbl	-0.251901	-2.82503	0.0072816	0.0976062
Q5EBJ4	Ermin	Ermn	0.390891	2.82577	0.00726761	0.0976062
Q60875	Rho guanine nucleotide exchange factor 2	Arhgef2	-0.24883	-2.82765	0.0072322	0.0976062
Q9CQ22	Ragulator complex protein LAMTOR1	Lamtor1	0.530099	2.81955	0.00738622	0.0986391
O35604	Niemann-Pick C1 protein	Npc1	0.566553	2.81799	0.00741627	0.0986722
O88441	Metaxin-2	Mtx2	-0.310507	-2.81559	0.00746269	0.0989221
Q9CZB0	Succinate dehydrogenase cytochrome b560 subunit, mitochondrial	Sdhc	-0.730083	-2.80791	0.00761296	0.100542
O08599	Syntaxin-binding protein 1	Stxbp1	-0.169662	-2.79558	0.00786001	0.103303
P12367	cAMP-dependent protein kinase type II-alpha regulatory subunit	Prkar2a	-0.235921	-2.79283	0.00791629	0.103303
P97797	Tyrosine-protein phosphatase non-receptor type substrate 1	Sirpa	-0.288884	-2.79412	0.00788981	0.103303
Q99KI0	Aconitate hydratase, mitochondrial	Aco2	-0.143503	-2.79179	0.00793749	0.103303
B9EJA2	Cortactin-binding protein 2	Cttnbp2	-0.195127	-2.78653	0.00804618	0.103961
Q60967	Bifunctional 3-phosphoadenosine 5-phosphosulfate synthase 1;Sulfate adenylyltransferase;Adenylyl-sulfate kinase	Papss1	0.56367	2.78724	0.00803148	0.103961
P35436	Glutamate receptor ionotropic, NMDA 2A	Grin2a	-0.303551	-2.77842	0.00821642	0.105382
Q6ZQI3	Malectin	Mlec	0.470016	2.7767	0.00825309	0.105382
Q91V76	Ester hydrolase C11orf54 homolog		0.252157	2.77434	0.00830336	0.105382
Q9CQ40	39S ribosomal protein L49, mitochondrial	Mrpl49	-0.51534	-2.7744	0.00830204	0.105382
Q9JKX6	ADP-sugar pyrophosphatase	Nudt5	-0.412901	-2.77633	0.008261	0.105382
Q80T41	Gamma-aminobutyric acid type B receptor subunit 2	Gabbr2	-0.254747	-2.77121	0.00837071	0.105574
Q920I9	WD repeat-containing protein 7	Wdr7	-0.181424	-2.77089	0.00837747	0.105574
Q60930	Voltage-dependent anion-selective channel protein 2	Vdac2	-0.235752	-2.76245	0.00856161	0.106396
Q8CCN5	Breast carcinoma-amplified sequence 3 homolog	Bcas3	-0.236956	-2.7637	0.00853403	0.106396
Q8CHG7	Rap guanine nucleotide exchange factor 2	Rapgef2	-0.226024	-2.76313	0.00854659	0.106396
Q9CWS0	N(G),N(G)-dimethylarginine dimethylaminohydrolase 1	Ddah1	0.157135	2.76273	0.00855537	0.106396
B1AXV0	DOMON domain-containing protein FRRS1L	Frrs1l	-0.316844	-2.75276	0.00877751	0.107828
P40124	Adenylyl cyclase-associated protein 1	Cap1	0.172487	2.75361	0.00875847	0.107828
Q3UTZ3	Uncharacterized protein C7orf43 homolog		0.546373	2.75273	0.00877821	0.107828
Q6P9K8;Q8VHK1	Caskin-1	Caskin1	-0.192623	-2.75071	0.00882385	0.107828
Q8BH59	Calcium-binding mitochondrial carrier protein Aralar1	Slc25a12	-0.173029	-2.75055	0.00882753	0.107828
O89023	Tripeptidyl-peptidase 1	Tpp1	0.557017	2.74797	0.00888607	0.107989
Q8R086	Sulfite oxidase, mitochondrial	Suox	0.479014	2.74599	0.00893122	0.107989
Q9QYY8	Spastin	Spast	0.392158	2.74686	0.00891152	0.107989
P84096	Rho-related GTP-binding protein RhoG	Rhog	0.280229	2.74409	0.00897494	0.108153
O70228	Probable phospholipid-transporting ATPase IIA	Atp9a	0.453178	2.73962	0.00907824	0.108976
Q920Q4	Vacuolar protein sorting-associated protein 16 homolog	Vps16	0.386773	2.73851	0.00910419	0.108976
P16045	Galectin-1	Lgals1	0.477754	2.73345	0.00922275	0.109299
P34914	Bifunctional epoxide hydrolase 2;Cytosolic epoxide hydrolase 2;Lipid-phosphate phosphatase	Ephx2	0.279989	2.73468	0.00919386	0.109299
P47758	Signal recognition particle receptor subunit beta	Srprb	0.35593	2.73457	0.00919648	0.109299
Q3THK7	GMP synthase [glutamine-hydrolyzing]	Gmps	-0.211806	-2.72651	0.00938798	0.11089
A2A8Z1	Oxysterol-binding protein-related protein 9	Osbpl9	0.687544	2.72241	0.00948678	0.110896
O88587	Catechol O-methyltransferase	Comt	0.426868	2.72274	0.00947877	0.110896
Q80UM7	Mannosyl-oligosaccharide glucosidase	Mogs	0.538238	2.72135	0.00951248	0.110896
Q9QYB1	Chloride intracellular channel protein 4	Clic4	0.261651	2.72499	0.00942442	0.110896
F8VPU2	FERM, RhoGEF and pleckstrin domain-containing protein 1	Farp1	0.229989	2.71863	0.00957878	0.111056
P63213	Guanine nucleotide-binding protein G(I)/G(S)/G(O) subunit gamma-2	Gng2	-0.201604	-2.71824	0.00958825	0.111056
G5E829	Plasma membrane calcium-transporting ATPase 1	Atp2b1	-0.143985	-2.71581	0.00964782	0.111244
P05480;P25911;P08103;P16056;Q922K9;Q62270	Neuronal proto-oncogene tyrosine-protein kinase Src	Src	-0.254935	-2.71505	0.00966665	0.111244
P42225	Signal transducer and activator of transcription 1	Stat1	2.44748	2.71164	0.00975107	0.111856
Q8CGY8	UDP-N-acetylglucosamine--peptide N-acetylglucosaminyltransferase 110 kDa subunit	Ogt	-0.215537	-2.70698	0.00986731	0.112527
Q9QX11	Cytohesin-1	Cyth1	2.30987	2.70678	0.00987243	0.112527
Q91ZR1	Ras-related protein Rab-4B	Rab4b	0.35176	2.70373	0.00994924	0.113042
Q8BTI8	Serine/arginine repetitive matrix protein 2	Srrm2	-0.21034	-2.69968	0.0100524	0.113494
Q9CZN7;P50431	Serine hydroxymethyltransferase	Shmt2	-0.385985	-2.70031	0.0100362	0.113494
P62748	Hippocalcin-like protein 1	Hpcal1	-0.409838	-2.69037	0.0102928	0.115843
Q91YW3	DnaJ homolog subfamily C member 3	Dnajc3	0.662773	2.68399	0.0104605	0.117361
Q99JR1	Sideroflexin-1	Sfxn1	-0.217262	-2.68043	0.0105555	0.118057
Q8VHW2	Voltage-dependent calcium channel gamma-8 subunit	Cacng8	-0.227828	-2.67719	0.0106425	0.11829
Q9D1L9	Ragulator complex protein LAMTOR5	Lamtor5	0.561748	2.67822	0.0106147	0.11829
Q6NZC7	SEC23-interacting protein	Sec23ip	0.361384	2.67253	0.0107686	0.119055
Q8R191	Synaptogyrin-3	Syngr3	-0.250842	-2.67219	0.0107779	0.119055
Q07417	Short-chain specific acyl-CoA dehydrogenase, mitochondrial	Acads	0.351864	2.6697	0.0108459	0.119438
Q8BHL3	TBC1 domain family member 10B	Tbc1d10b	-0.574191	-2.66762	0.0109029	0.119647
Q9ET77	Junctophilin-3	Jph3	-0.410345	-2.66658	0.0109317	0.119647
Q9D7X3	Dual specificity protein phosphatase 3	Dusp3	-0.304826	-2.66524	0.0109686	0.119685
P70697	Uroporphyrinogen decarboxylase	Urod	0.459157	2.66147	0.0110736	0.120463
P84086	Complexin-2	Cplx2	-0.283372	-2.65869	0.0111514	0.120576
Q62261;Q99MJ6	Spectrin beta chain, non-erythrocytic 1	Sptbn1	-0.136945	-2.65928	0.011135	0.120576
Q9Z1T2	Thrombospondin-4	Thbs4	0.670193	2.65685	0.0112032	0.120772
O08997	Copper transport protein ATOX1	Atox1	0.393169	2.65491	0.0112584	0.120997
Q3TCN2	Putative phospholipase B-like 2;Putative phospholipase B-like 2 28 kDa form;Putative phospholipase B-like 2 40 kDa form;Putative phospholipase B-like 2 15 kDa form	Plbd2	0.580009	2.65373	0.0112917	0.120997
P47941	Crk-like protein	Crkl	0.459795	2.64901	0.0114268	0.122079
O88485	Cytoplasmic dynein 1 intermediate chain 1	Dync1i1	-0.244683	-2.64617	0.0115088	0.122589
Q61490	CD166 antigen	Alcam	-0.203829	-2.64033	0.0116789	0.124032
P70670;Q60817	Nascent polypeptide-associated complex subunit alpha, muscle-specific form;Nascent polypeptide-associated complex subunit alpha	Naca	0.297317	2.63263	0.0119069	0.125754
Q9D051	Pyruvate dehydrogenase E1 component subunit beta, mitochondrial	Pdhb	-0.145411	-2.63219	0.01192	0.125754
Q9DCN2	NADH-cytochrome b5 reductase 3;NADH-cytochrome b5 reductase 3 membrane-bound form;NADH-cytochrome b5 reductase 3 soluble form	Cyb5r3	0.191798	2.6313	0.0119465	0.125754
Q64521	Glycerol-3-phosphate dehydrogenase, mitochondrial	Gpd2	-0.192924	-2.6274	0.012064	0.126619
P08003	Protein disulfide-isomerase A4	Pdia4	0.312895	2.62561	0.0121182	0.126815
P20352	Tissue factor	F3	-0.326671	-2.62182	0.0122338	0.127652
Q99LY9	NADH dehydrogenase [ubiquinone] iron-sulfur protein 5;NADH dehydrogenase [ubiquinone] iron-sulfur protein 5, N-terminally processed	Ndufs5	-0.162026	-2.61834	0.0123408	0.128394
P21981	Protein-glutamine gamma-glutamyltransferase 2	Tgm2	0.894861	2.61664	0.012393	0.12843
Q3UNZ8	Quinone oxidoreductase-like protein 2		0.621939	2.6159	0.012416	0.12843
O88741	Ganglioside-induced differentiation-associated protein 1	Gdap1	-0.233391	-2.6139	0.0124783	0.12845
Q9CXZ1	NADH dehydrogenase [ubiquinone] iron-sulfur protein 4, mitochondrial	Ndufs4	-0.215857	-2.61354	0.0124897	0.12845
Q9Z1B3	1-phosphatidylinositol 4,5-bisphosphate phosphodiesterase beta-1	Plcb1	-0.139584	-2.60551	0.0127424	0.130566
Q9Z2C4	Myotubularin-related protein 1	Mtmr1	-0.240996	-2.60469	0.0127684	0.130566
Q61696	Heat shock 70 kDa protein 1A	Hspa1a	-0.210778	-2.60255	0.0128369	0.130892
P58281;P58682	Dynamin-like 120 kDa protein, mitochondrial;Dynamin-like 120 kDa protein, form S1	Opa1	-0.143225	-2.6001	0.0129154	0.131318
Q80XI4	Phosphatidylinositol 5-phosphate 4-kinase type-2 beta	Pip4k2b	-0.188745	-2.58939	0.0132643	0.13366
Q80Y17	Lethal(2) giant larvae protein homolog 1	Llgl1	0.293558	2.59116	0.013206	0.13366
Q8C0L9	Glycerophosphocholine phosphodiesterase GPCPD1	Gpcpd1	-0.404799	-2.58846	0.013295	0.13366
Q8C5Q4	G-rich sequence factor 1	Grsf1	-0.49773	-2.58909	0.0132743	0.13366
Q61553	Fascin	Fscn1	-0.195218	-2.58698	0.0133441	0.133777
Q8BNW9	Kelch repeat and BTB domain-containing protein 11	Kbtbd11	-0.229681	-2.58007	0.013575	0.135712
Q148V7	LisH domain and HEAT repeat-containing protein KIAA1468	Kiaa1468	-0.225691	-2.57686	0.0136836	0.136417
P51863	V-type proton ATPase subunit d 1	Atp6v0d1	-0.175743	-2.57458	0.0137612	0.136537
P52196	Thiosulfate sulfurtransferase	Tst	0.349781	2.57426	0.0137719	0.136537
O55234	Proteasome subunit beta type-5	Psmb5	-0.330329	-2.57073	0.013893	0.136978
Q8BHN3	Neutral alpha-glucosidase AB	Ganab	0.154865	2.57151	0.0138661	0.136978
Q9DCP2	Sodium-coupled neutral amino acid transporter 3	Slc38a3	-0.728043	-2.56874	0.0139616	0.137276
Q02053;P31254	Ubiquitin-like modifier-activating enzyme 1	Uba1	-0.133908	-2.56065	0.0142437	0.139666
P29758	Ornithine aminotransferase, mitochondrial	Oat	0.225445	2.55577	0.0144165	0.140975
P19324	Serpin H1	Serpinh1	0.358468	2.54961	0.0146371	0.141397
P39053	Dynamin-1	Dnm1	-0.139387	-2.54796	0.0146967	0.141397
P46935	E3 ubiquitin-protein ligase NEDD4	Nedd4	0.205912	2.54922	0.0146514	0.141397
P47746	Cannabinoid receptor 1	Cnr1	-0.352439	-2.54864	0.0146722	0.141397
P70168	Importin subunit beta-1	Kpnb1	-0.194267	-2.549	0.014659	0.141397
Q9JJV5	Voltage-dependent calcium channel gamma-3 subunit	Cacng3	-0.451885	-2.55339	0.0145013	0.141397
P80315	T-complex protein 1 subunit delta	Cct4	-0.21686	-2.54155	0.0149308	0.142518
Q8BHJ7	Gamma-aminobutyric acid receptor subunit alpha-5	Gabra5	-0.484023	-2.5415	0.0149327	0.142518
Q9DCL9	Multifunctional protein ADE2;Phosphoribosylaminoimidazole-succinocarboxamide synthase;Phosphoribosylaminoimidazole carboxylase	Paics	0.260423	2.54253	0.0148948	0.142518
Q8BLQ9	Cell adhesion molecule 2	Cadm2	-0.189944	-2.53571	0.0151469	0.144177
O88384	Vesicle transport through interaction with t-SNAREs homolog 1B	Vti1b	0.395991	2.52414	0.0155829	0.144899
P29595	NEDD8	Nedd8	-0.472411	-2.52298	0.0156275	0.144899
P46978	Dolichyl-diphosphooligosaccharide--protein glycosyltransferase subunit STT3A	Stt3a	0.351372	2.52787	0.0154411	0.144899
Q3UHB1	5-nucleotidase domain-containing protein 3	Nt5dc3	-0.178622	-2.52402	0.0155877	0.144899
Q6P1B1	Xaa-Pro aminopeptidase 1	Xpnpep1	-0.180064	-2.52622	0.0155039	0.144899
Q8C050	Ribosomal protein S6 kinase alpha-5	Rps6ka5	0.538947	2.52351	0.0156073	0.144899
Q8VHL1	Histone-lysine N-methyltransferase SETD7	Setd7	-0.250627	-2.52875	0.0154078	0.144899
Q91WJ8	Far upstream element-binding protein 1	Fubp1	-0.352516	-2.52308	0.0156236	0.144899
Q9CQI6	Coactosin-like protein	Cotl1	0.256722	2.52475	0.0155598	0.144899
Q9Z2A0	3-phosphoinositide-dependent protein kinase 1	Pdpk1	-0.5136	-2.53037	0.0153467	0.144899
P48771	Cytochrome c oxidase subunit 7A2, mitochondrial	Cox7a2	-0.481604	-2.51942	0.0157644	0.14579
Q91WS0	CDGSH iron-sulfur domain-containing protein 1	Cisd1	-0.203674	-2.51833	0.0158065	0.145803
P55288	Cadherin-11	Cdh11	-0.444972	-2.51659	0.0158741	0.145878
Q5H8C4	Vacuolar protein sorting-associated protein 13A	Vps13a	-0.45478	-2.51602	0.0158962	0.145878
P11352	Glutathione peroxidase 1	Gpx1	0.308519	2.51367	0.0159878	0.14597
Q9CQZ6	NADH dehydrogenase [ubiquinone] 1 beta subcomplex subunit 3	Ndufb3	-0.361587	-2.51419	0.0159677	0.14597
P70280	Vesicle-associated membrane protein 7	Vamp7	0.531187	2.51261	0.0160296	0.145979
P50114	Protein S100-B	S100b	0.451644	2.51077	0.0161017	0.146023
Q8BWY3	Eukaryotic peptide chain release factor subunit 1	Etf1	0.439202	2.51041	0.016116	0.146023
P56212	cAMP-regulated phosphoprotein 19	Arpp19	-0.608326	-2.50891	0.0161751	0.146188
Q8BFR4	N-acetylglucosamine-6-sulfatase	Gns	0.435212	2.50638	0.0162756	0.146726
Q5M8N4	Epimerase family protein SDR39U1	Sdr39u1	0.45217	2.50411	0.0163658	0.147169
Q9CQA3	Succinate dehydrogenase [ubiquinone] iron-sulfur subunit, mitochondrial	Sdhb	-0.189184	-2.50231	0.0164381	0.147448
Q8CC27	Voltage-dependent L-type calcium channel subunit beta-2	Cacnb2	-0.384255	-2.50092	0.0164936	0.147577
Q5M8N0	CB1 cannabinoid receptor-interacting protein 1	Cnrip1	-0.207	-2.49628	0.0166814	0.148398
Q640R3	Hepatocyte cell adhesion molecule	Hepacam	0.230845	2.49558	0.0167098	0.148398
Q9DB72	BTB/POZ domain-containing protein 17	Btbd17	-0.392109	-2.4958	0.0167007	0.148398
Q8BK72	28S ribosomal protein S27, mitochondrial	Mrps27	-0.529642	-2.49435	0.0167601	0.148476
Q810B6	Rabankyrin-5	Ankfy1	0.30273	2.49313	0.0168098	0.148549
Q91YQ5	Dolichyl-diphosphooligosaccharide--protein glycosyltransferase subunit 1	Rpn1	0.173799	2.49085	0.0169036	0.149009
P63001;P60764;Q05144	Ras-related C3 botulinum toxin substrate 1;Ras-related C3 botulinum toxin substrate 3	Rac1;Rac3	-0.178003	-2.48798	0.0170218	0.149683
Q6PER3	Microtubule-associated protein RP/EB family member 3	Mapre3	-0.134001	-2.47994	0.0173579	0.151522
Q8C0L0	Thioredoxin-related transmembrane protein 4	Tmx4	-0.346974	-2.48128	0.0173017	0.151522
Q9CQR2	40S ribosomal protein S21	Rps21	0.264154	2.48072	0.0173249	0.151522
P68404	Protein kinase C beta type	Prkcb	-0.1872	-2.47574	0.017536	0.152613
Q64362	AKT-interacting protein	Aktip	0.368565	2.47498	0.0175682	0.152613
P99024	Tubulin beta-5 chain	Tubb5	-0.205866	-2.47244	0.0176767	0.152886
Q8BLK3	Limbic system-associated membrane protein	Lsamp	-0.193474	-2.47224	0.0176851	0.152886
Q99K70	Ras-related GTP-binding protein C	Rragc	0.603448	2.47061	0.0177553	0.153123
P62245	40S ribosomal protein S15a	Rps15a	-0.313418	-2.46879	0.0178338	0.153431
Q8C078	Calcium/calmodulin-dependent protein kinase kinase 2	Camkk2	-0.338006	-2.46675	0.0179223	0.153822
P49615;Q14AX6;Q69ZA1;P11440;P97377;Q99J95;Q3V3A1;Q80YP0;Q64261;P30285	Cyclin-dependent-like kinase 5	Cdk5	-0.195442	-2.46376	0.0180522	0.153831
Q924L1	LETM1 domain-containing protein 1	Letmd1	-0.295931	-2.46411	0.0180369	0.153831
Q9JM13	Rab5 GDP/GTP exchange factor	Rabgef1	-0.462263	-2.46495	0.0180003	0.153831
O70309	Integrin beta-5	Itgb5	0.704953	2.45848	0.0182845	0.15544
Q8BH24	Transmembrane 9 superfamily member 4	Tm9sf4	0.419197	2.4569	0.0183541	0.155662
O88951	Protein lin-7 homolog B	Lin7b	-0.299614	-2.44866	0.0187229	0.158414
Q5PR73	GTP-binding protein Di-Ras2	Diras2	-0.227186	-2.44561	0.0188613	0.159209
P43277	Histone H1.3	Hist1h1d	0.301591	2.4437	0.0189482	0.159566
A2AJA9	Uncharacterized protein C9orf172 homolog	Gm996	-0.36052	-2.44054	0.0190927	0.160313
Q9CQC7	NADH dehydrogenase [ubiquinone] 1 beta subcomplex subunit 4	Ndufb4	-0.183784	-2.43981	0.0191265	0.160313
Q9CQE5	Regulator of G-protein signaling 10	Rgs10	0.43846	2.43572	0.0193155	0.161519
Q9DCZ1	GMP reductase 1	Gmpr	0.376618	2.43473	0.0193617	0.161528
Q99KC8	von Willebrand factor A domain-containing protein 5A	Vwa5a	0.401603	2.43209	0.0194848	0.162177
Q9D0E1	Heterogeneous nuclear ribonucleoprotein M	Hnrnpm	-0.169798	-2.43	0.0195828	0.162614
Q9CQZ5	NADH dehydrogenase [ubiquinone] 1 alpha subcomplex subunit 6	Ndufa6	-0.265749	-2.42832	0.0196619	0.162778
Q9D967	Magnesium-dependent phosphatase 1	Mdp1	0.280986	2.42766	0.0196934	0.162778
P20357	Microtubule-associated protein 2	Map2	-0.133935	-2.4248	0.0198288	0.162895
Q56A07	Sodium channel subunit beta-2	Scn2b	-0.381234	-2.42448	0.0198442	0.162895
Q8JZK9	Hydroxymethylglutaryl-CoA synthase, cytoplasmic	Hmgcs1	0.410868	2.4254	0.0198001	0.162895
Q64332	Synapsin-2	Syn2	-0.137709	-2.42346	0.0198926	0.162919
P28663	Beta-soluble NSF attachment protein	Napb	-0.145118	-2.41879	0.0201168	0.164379
A2AHC3	Calmodulin-regulated spectrin-associated protein 1	Camsap1	0.46374	2.41475	0.0203121	0.165555
A2RT62	F-box/LRR-repeat protein 16	Fbxl16	-0.194857	-2.4139	0.0203533	0.165555
P23492	Purine nucleoside phosphorylase	Pnp	0.405558	2.41168	0.0204619	0.165686
Q9DCZ4	Apolipoprotein O	Apoo	-0.208679	-2.41261	0.0204163	0.165686
Q80ZJ6	Protein zer-1 homolog	Zer1	-0.435107	-2.40964	0.0205618	0.165745
Q9DBH5	Vesicular integral-membrane protein VIP36	Lman2	0.322949	2.40969	0.0205594	0.165745
Q91V92	ATP-citrate synthase	Acly	0.180468	2.40787	0.0206491	0.166075
Q9CQ75	NADH dehydrogenase [ubiquinone] 1 alpha subcomplex subunit 2	Ndufa2	-0.272111	-2.40615	0.0207339	0.166382
P98203	Armadillo repeat protein deleted in velo-cardio-facial syndrome homolog	Arvcf	-0.528377	-2.4034	0.0208709	0.167107
Q99NB1	Acetyl-coenzyme A synthetase 2-like, mitochondrial	Acss1	-0.335817	-2.40151	0.020965	0.167486
Q9CR86	Calcium-regulated heat stable protein 1	Carhsp1	0.471702	2.40053	0.0210143	0.167506
P63028	Translationally-controlled tumor protein	Tpt1	-0.186549	-2.39476	0.0213051	0.169071
P63318	Protein kinase C gamma type	Prkcg	-0.144549	-2.39531	0.0212775	0.169071
Q8BG32	26S proteasome non-ATPase regulatory subunit 11	Psmd11	-0.367487	-2.39343	0.0213726	0.169231
Q7TQF7	Amphiphysin	Amph	-0.186628	-2.39079	0.0215075	0.169923
O89112	LanC-like protein 1	Lancl1	-0.284616	-2.38583	0.021763	0.169973
P16054;P23298	Protein kinase C epsilon type	Prkce	-0.14517	-2.3871	0.0216971	0.169973
Q08331	Calretinin	Calb2	-0.228244	-2.38514	0.0217987	0.169973
Q3UUI3	Acyl-coenzyme A thioesterase THEM4	Them4	-0.33689	-2.38557	0.0217762	0.169973
Q6Y7W8	PERQ amino acid-rich with GYF domain-containing protein 2	Gigyf2	-0.445243	-2.38808	0.0216467	0.169973
Q9WV92	Band 4.1-like protein 3;Band 4.1-like protein 3, N-terminally processed	Epb41l3	-0.149175	-2.3859	0.021759	0.169973
P62812	Gamma-aminobutyric acid receptor subunit alpha-1	Gabra1	-0.223131	-2.38191	0.0219662	0.170757
Q05816	Fatty acid-binding protein, epidermal	Fabp5	0.243265	2.38137	0.0219947	0.170757
Q60996	Serine/threonine-protein phosphatase 2A 56 kDa regulatory subunit gamma isoform	Ppp2r5c	-0.242419	-2.37968	0.0220831	0.171073
Q3TW96	UDP-N-acetylhexosamine pyrophosphorylase-like protein 1	Uap1l1	0.445145	2.37145	0.0225184	0.173798
Q9CZ13	Cytochrome b-c1 complex subunit 1, mitochondrial	Uqcrc1	-0.129732	-2.37028	0.0225807	0.173798
Q9WUA3	ATP-dependent 6-phosphofructokinase, platelet type	Pfkp	-0.152443	-2.37045	0.0225715	0.173798
P56565	Protein S100-A1	S100a1	0.514327	2.3645	0.0228921	0.175817
O70456	14-3-3 protein sigma	Sfn	2.24627	2.35706	0.023298	0.177035
Q04750	DNA topoisomerase 1	Top1	-0.363188	-2.35808	0.023242	0.177035
Q4VAE3	Transmembrane protein 65	Tmem65	-0.439779	-2.3586	0.0232136	0.177035
Q921I1	Serotransferrin	Tf	0.330662	2.35852	0.0232178	0.177035
Q9QZD8	Mitochondrial dicarboxylate carrier	Slc25a10	0.442426	2.35735	0.0232821	0.177035
Q9QZ06	Toll-interacting protein	Tollip	0.239466	2.35572	0.023372	0.177221
Q6PAR5	GTPase-activating protein and VPS9 domain-containing protein 1	Gapvd1	-0.272543	-2.35476	0.0234249	0.177247
Q8BG73	SH3 domain-binding glutamic acid-rich-like protein 2	Sh3bgrl2	-0.293491	-2.35385	0.0234755	0.177255
Q8BH44	Coronin-2B	Coro2b	-0.20532	-2.35162	0.0235989	0.177812
Q8BWF0	Succinate-semialdehyde dehydrogenase, mitochondrial	Aldh5a1	-0.148404	-2.34945	0.0237198	0.178347
Q61739	Integrin alpha-6;Integrin alpha-6 heavy chain;Integrin alpha-6 light chain	Itga6	0.479204	2.34827	0.0237864	0.178473
Q62086	Serum paraoxonase/arylesterase 2	Pon2	0.612107	2.34508	0.0239658	0.179068
Q99K85	Phosphoserine aminotransferase	Psat1	0.196084	2.34558	0.0239372	0.179068
Q91ZP9	N-terminal EF-hand calcium-binding protein 2	Necab2	-0.227063	-2.34226	0.0241253	0.179884
P15379	CD44 antigen	Cd44	0.610798	2.33981	0.0242644	0.180171
Q99PM3	Transcription initiation factor IIA subunit 1;Transcription initiation factor IIA alpha chain;Transcription initiation factor IIA beta chain	Gtf2a1	-0.363436	-2.34018	0.0242433	0.180171
O54829	Regulator of G-protein signaling 7	Rgs7	-0.229016	-2.33786	0.024376	0.180251
P07356	Annexin A2	Anxa2	0.687574	2.33863	0.0243323	0.180251
P17183	Gamma-enolase	Eno2	-0.156512	-2.33678	0.0244381	0.180338
P35700	Peroxiredoxin-1	Prdx1	0.190197	2.3352	0.0245287	0.180634
P23927	Alpha-crystallin B chain	Cryab	0.460412	2.33227	0.0246985	0.181511
Q6ZPR5	Sphingomyelin phosphodiesterase 4	Smpd4	-0.513781	-2.33139	0.0247494	0.181512
P33173	Kinesin-like protein KIF1A	Kif1a	0.196284	2.32966	0.0248498	0.181876
Q9D0B6	Protein PBDC1	Pbdc1	-0.353781	-2.32797	0.0249488	0.182228
O54941	SWI/SNF-related matrix-associated actin-dependent regulator of chromatin subfamily E member 1	Smarce1	-0.3995	-2.32623	0.025051	0.182602
O54983	Ketimine reductase mu-crystallin	Crym	-0.230718	-2.32449	0.0251533	0.182975
Q9R0Q6	Actin-related protein 2/3 complex subunit 1A	Arpc1a	-0.171566	-2.32279	0.0252537	0.18333
Q9WV34	MAGUK p55 subfamily member 2	Mpp2	-0.170915	-2.32193	0.0253046	0.18333
P55264	Adenosine kinase	Adk	0.184644	2.32092	0.0253646	0.183394
Q8VHE0	Translocation protein SEC63 homolog	Sec63	0.476498	2.31767	0.025558	0.184419
P40142	Transketolase	Tkt	0.159988	2.31285	0.0258478	0.186135
Q8CE50	Sorting nexin-30	Snx30	0.364405	2.31151	0.0259286	0.186284
Q9D379	Epoxide hydrolase 1	Ephx1	0.354602	2.31079	0.0259726	0.186284
O35874	Neutral amino acid transporter A	Slc1a4	0.247303	2.30559	0.0262896	0.187455
P28650	Adenylosuccinate synthetase isozyme 1	Adssl1	0.381386	2.30553	0.026293	0.187455
Q922S4	cGMP-dependent 3,5-cyclic phosphodiesterase	Pde2a	-0.150694	-2.30591	0.0262696	0.187455
Q6PE01	U5 small nuclear ribonucleoprotein 40 kDa protein	Snrnp40	0.335092	2.30141	0.0265469	0.188515
Q8BXR1	Probable cationic amino acid transporter	Slc7a14	-0.255947	-2.30187	0.0265183	0.188515
P62137	Serine/threonine-protein phosphatase PP1-alpha catalytic subunit	Ppp1ca	-0.147994	-2.29942	0.0266702	0.188557
Q8K0U4	Heat shock 70 kDa protein 12A	Hspa12a	-0.18964	-2.29969	0.0266537	0.188557
Q9QVP9	Protein-tyrosine kinase 2-beta	Ptk2b	-0.145746	-2.29876	0.0267109	0.188557
Q9DCS9	NADH dehydrogenase [ubiquinone] 1 beta subcomplex subunit 10	Ndufb10	-0.213102	-2.29643	0.0268562	0.18921
P47753	F-actin-capping protein subunit alpha-1	Capza1	0.230785	2.28639	0.0274904	0.190385
P63044	Vesicle-associated membrane protein 2	Vamp2	-0.187023	-2.28631	0.0274959	0.190385
Q5RJI5	Serine/threonine-protein kinase BRSK1	Brsk1	-0.327703	-2.28817	0.027377	0.190385
Q80UP3	Diacylglycerol kinase zeta	Dgkz	-0.296226	-2.28621	0.0275019	0.190385
Q8CJH3;Q9QY40	Plexin-B1	Plxnb1	0.335038	2.29104	0.0271954	0.190385
Q8K406	Leucine-rich repeat LGI family member 3	Lgi3	0.661948	2.28711	0.0274447	0.190385
Q8R5L3	Vam6/Vps39-like protein	Vps39	0.378828	2.29212	0.0271273	0.190385
Q925E7	Serine/threonine-protein phosphatase 2A 55 kDa regulatory subunit B delta isoform	Ppp2r2d	-0.736493	-2.29136	0.027175	0.190385
Q9Z2W9	Glutamate receptor 3	Gria3	-0.285218	-2.28826	0.0273713	0.190385
P61264;Q00262	Syntaxin-1B	Stx1b	-0.188656	-2.28414	0.0276344	0.190933
P23819	Glutamate receptor 2	Gria2	-0.127298	-2.28318	0.0276965	0.190994
Q63912	Oligodendrocyte-myelin glycoprotein	Omg	-0.251221	-2.28106	0.0278324	0.191562
Q61335	B-cell receptor-associated protein 31	Bcap31	0.743697	2.27845	0.0280019	0.192358
Q9EQZ6	Rap guanine nucleotide exchange factor 4	Rapgef4	-0.264552	-2.27653	0.0281266	0.192845
Q8BH57	WD repeat-containing protein 48	Wdr48	-0.287942	-2.27447	0.0282612	0.193397
O08539	Myc box-dependent-interacting protein 1	Bin1	-0.162409	-2.27259	0.0283843	0.193869
P47867	Secretogranin-3	Scg3	0.588864	2.26533	0.0288643	0.196349
P50580	Proliferation-associated protein 2G4	Pa2g4	0.191202	2.26462	0.028912	0.196349
Q9D964	Glycine amidinotransferase, mitochondrial	Gatm	0.737898	2.26531	0.028866	0.196349
Q9CYG7	Mitochondrial import receptor subunit TOM34	Tomm34	-0.230319	-2.26232	0.0290657	0.197019
P61161	Actin-related protein 2	Actr2	-0.158798	-2.26086	0.029164	0.197312
Q3TXX4;Q8BFU8;Q5SZA1;Q61983	Vesicular glutamate transporter 1	Slc17a7	-0.202522	-2.25821	0.0293425	0.197772
Q99PJ0	Neurotrimin	Ntm	-0.187346	-2.25867	0.0293113	0.197772
P57780	Alpha-actinin-4	Actn4	-0.161517	-2.25517	0.0295492	0.198417
Q8BVI4	Dihydropteridine reductase	Qdpr	0.175475	2.25535	0.0295365	0.198417
Q641P0	Actin-related protein 3B	Actr3b	-0.173268	-2.25432	0.0296067	0.198432
Q3UPH1	Protein PRRC1	Prrc1	0.357583	2.24994	0.0299071	0.20007
P47809	Dual specificity mitogen-activated protein kinase kinase 4	Map2k4	-0.163474	-2.24837	0.0300149	0.200417
Q91YU3	Myb/SANT-like DNA-binding domain-containing protein 4	Msantd4	0.438054	2.24726	0.0300915	0.200554
P62774	Myotrophin	Mtpn	-0.197228	-2.24277	0.0304039	0.201506
Q8K596		Slc8a2	-0.179287	-2.24172	0.0304772	0.201506
Q91VR8	Protein BRICK1	Brk1	-0.354675	-2.24183	0.0304698	0.201506
Q924N4	Solute carrier family 12 member 6	Slc12a6	-0.39594	-2.24072	0.0305476	0.201506
Q99KV1	DnaJ homolog subfamily B member 11	Dnajb11	0.333809	2.24037	0.0305722	0.201506
Q9D924	Iron-sulfur cluster assembly 1 homolog, mitochondrial	Isca1	-0.333535	-2.24037	0.0305718	0.201506
Q8CHP8	Phosphoglycolate phosphatase	Pgp	-0.200437	-2.23897	0.0306699	0.201779
O08915	AH receptor-interacting protein	Aip	-0.295556	-2.2355	0.030915	0.201907
Q60598	Src substrate cortactin	Cttn	-0.160349	-2.23652	0.030843	0.201907
Q8BTG3	T-complex protein 11-like protein 1	Tcp11l1	0.389815	2.23571	0.0309003	0.201907
Q9CVB6	Actin-related protein 2/3 complex subunit 2	Arpc2	-0.147268	-2.23753	0.0307719	0.201907
P17879	Heat shock 70 kDa protein 1B	Hspa1b	-0.388946	-2.23365	0.0310467	0.202029
Q9WTT4	V-type proton ATPase subunit G 2	Atp6v1g2	-0.183687	-2.23398	0.0310232	0.202029
P48758	Carbonyl reductase [NADPH] 1	Cbr1	-0.162184	-2.23222	0.0311488	0.202326
Q9Z2H5	Band 4.1-like protein 1	Epb41l1	-0.153964	-2.23108	0.0312299	0.202485
Q5SUR0	Phosphoribosylformylglycinamidine synthase	Pfas	-0.276265	-2.22808	0.0314451	0.203144
Q9CYT6	Adenylyl cyclase-associated protein 2	Cap2	-0.131765	-2.22846	0.0314176	0.203144
P28028	Serine/threonine-protein kinase B-raf	Braf	-0.191343	-2.22416	0.0317281	0.204603
Q791V5	Mitochondrial carrier homolog 2	Mtch2	-0.239787	-2.22287	0.0318219	0.204839
P70202	Latexin	Lxn	0.346332	2.22164	0.0319113	0.205046
P14211	Calreticulin	Calr	0.188483	2.21828	0.0321576	0.205695
Q8VDN4	Coiled-coil domain-containing protein 92	Ccdc92	-0.426138	-2.21834	0.0321528	0.205695
Q9CZJ2	Heat shock 70 kDa protein 12B	Hspa12b	-0.412874	-2.21634	0.0322997	0.205695
Q9D6R2	Isocitrate dehydrogenase [NAD] subunit alpha, mitochondrial	Idh3a	-0.172737	-2.21672	0.0322722	0.205695
Q9DCJ5	NADH dehydrogenase [ubiquinone] 1 alpha subcomplex subunit 8	Ndufa8	-0.232838	-2.21655	0.0322843	0.205695
P70207	Plexin-A2	Plxna2	0.764428	2.21342	0.032516	0.206705
Q8BI08	Protein MAL2	Mal2	-0.300401	-2.21206	0.0326171	0.20698
Q91W67	Ubiquitin-like protein 7	Ubl7	0.522628	2.21115	0.0326844	0.20704
P68037	Ubiquitin-conjugating enzyme E2 L3	Ube2l3	0.268233	2.20788	0.0329292	0.207227
Q99JI6	Ras-related protein Rap-1b	Rap1b	-0.420297	-2.20766	0.0329456	0.207227
Q9CX00	IST1 homolog	Ist1	0.400982	2.20837	0.0328924	0.207227
Q9Z0H4	CUGBP Elav-like family member 2	Celf2	-0.206699	-2.20863	0.0328723	0.207227
Q6P069	Sorcin	Sri	0.275252	2.20478	0.0331622	0.208224
Q68ED2;P47743	Metabotropic glutamate receptor 7	Grm7	-0.363543	-2.19968	0.0335483	0.208816
Q80X85	28S ribosomal protein S7, mitochondrial	Mrps7	-0.527298	-2.20062	0.0334767	0.208816
Q8JZS0	Protein lin-7 homolog A	Lin7a	-0.277997	-2.201	0.0334485	0.208816
Q8K215	LYR motif-containing protein 4	Lyrm4	-0.499642	-2.19977	0.0335417	0.208816
Q8R2Y8	Peptidyl-tRNA hydrolase 2, mitochondrial	Ptrh2	-0.407883	-2.20038	0.0334952	0.208816
Q3TYX3	SET and MYND domain-containing protein 5	Smyd5	0.46517	2.19722	0.0337367	0.209625
Q9JIF0	Protein arginine N-methyltransferase 1	Prmt1	-0.207131	-2.19489	0.0339155	0.21037
Q8R1I1	Cytochrome b-c1 complex subunit 9	Uqcr10	-0.327558	-2.19216	0.0341258	0.211308
Q6PD26	GPI transamidase component PIG-S	Pigs	0.463719	2.18433	0.0347364	0.214348
Q99MR3	Solute carrier family 12 member 9	Slc12a9	0.335437	2.18476	0.0347028	0.214348
P27773	Protein disulfide-isomerase A3	Pdia3	0.165133	2.18014	0.0350671	0.216016
Q7TSV4	Phosphoglucomutase-2	Pgm2	0.48012	2.17608	0.0353904	0.217051
Q80U23;Q8BHS8	Syntaphilin	Snph	-0.250437	-2.17575	0.0354171	0.217051
Q922J3	CAP-Gly domain-containing linker protein 1	Clip1	0.262139	2.1767	0.0353406	0.217051
P50136	2-oxoisovalerate dehydrogenase subunit alpha, mitochondrial	Bckdha	-0.367781	-2.17455	0.0355129	0.21714
Q99L43	Phosphatidate cytidylyltransferase 2	Cds2	-0.273023	-2.17405	0.035553	0.21714
Q60597	2-oxoglutarate dehydrogenase, mitochondrial	Ogdh	-0.159044	-2.17306	0.0356324	0.217254
Q9R078	5-AMP-activated protein kinase subunit beta-1	Prkab1	0.309814	2.16912	0.0359506	0.218822
P02802	Metallothionein-1	Mt1	2.24309	2.16667	0.0361498	0.219288
Q9CWZ7	Gamma-soluble NSF attachment protein	Napg	-0.155337	-2.16724	0.0361028	0.219288
Q99L27	GMP reductase 2	Gmpr2	0.43838	2.16556	0.0362398	0.219462
Q9JKF6	Nectin-1	Pvrl1	-0.375603	-2.15711	0.0369353	0.223296
Q5FWK3	Rho GTPase-activating protein 1	Arhgap1	-0.185122	-2.15171	0.037386	0.22564
Q9CQF0	39S ribosomal protein L11, mitochondrial	Mrpl11	0.313983	2.14833	0.0376705	0.226974
A2AAE1	Uncharacterized protein KIAA1109	Kiaa1109	0.398861	2.1462	0.0378507	0.22739
O70250	Phosphoglycerate mutase 2	Pgam2	-0.466178	-2.14599	0.0378685	0.22739
Q61425	Hydroxyacyl-coenzyme A dehydrogenase, mitochondrial	Hadh	0.240664	2.14459	0.0379869	0.22739
Q6ZQ38	Cullin-associated NEDD8-dissociated protein 1	Cand1	-0.115964	-2.14377	0.0380571	0.22739
Q9ESJ4	NCK-interacting protein with SH3 domain	Nckipsd	-0.300111	-2.14399	0.0380381	0.22739
Q8CGF6	WD repeat-containing protein 47	Wdr47	-0.136255	-2.14297	0.0381252	0.227417
Q9ES56	Trafficking protein particle complex subunit 4	Trappc4	-0.355734	-2.13794	0.0385567	0.229608
A2A8L5	Receptor-type tyrosine-protein phosphatase F	Ptprf	0.515772	2.1358	0.0387416	0.230326
E9Q6P5		Ttc7b	-0.219928	-2.13253	0.0390254	0.231629
Q9JKC8	AP-3 complex subunit mu-1	Ap3m1	0.698817	2.13089	0.0391687	0.232094
Q8R422	CD109 antigen	Cd109	-0.356698	-2.12982	0.039262	0.232262
P67871	Casein kinase II subunit beta	Csnk2b	-0.171478	-2.12633	0.0395689	0.233518
Q6WQJ1	Sn1-specific diacylglycerol lipase alpha	Dagla	-0.312873	-2.12592	0.0396048	0.233518
Q80U63;Q811U4	Mitofusin-2	Mfn2	-0.221175	-2.12178	0.0399715	0.235293
Q9D061	Acyl-CoA-binding domain-containing protein 6	Acbd6	-0.356939	-2.11928	0.0401943	0.236216
Q7TSJ2	Microtubule-associated protein 6	Map6	-0.159587	-2.11595	0.0404933	0.237583
Q3TXS7	26S proteasome non-ATPase regulatory subunit 1	Psmd1	-0.186078	-2.11266	0.0407905	0.238935
Q921J2	GTP-binding protein Rheb	Rheb	0.283856	2.11004	0.0410283	0.239935
P62482	Voltage-gated potassium channel subunit beta-2	Kcnab2	-0.236822	-2.10722	0.041286	0.240276
Q62465	Synaptic vesicle membrane protein VAT-1 homolog	Vat1	0.199272	2.10616	0.041383	0.240276
Q64516;Q9WU65	Glycerol kinase	Gk	0.175485	2.105	0.0414893	0.240276
Q9D2P8	Myelin-associated oligodendrocyte basic protein	Mobp	1.08742	2.10544	0.0414487	0.240276
Q9EP69	Phosphatidylinositide phosphatase SAC1	Sacm1l	0.366168	2.10574	0.0414211	0.240276
Q9R1T4	Septin-6	2023-09-06	-0.212129	-2.10667	0.0413359	0.240276
O88983	Syntaxin-8	Stx8	0.344877	2.10271	0.0417001	0.241106
Q8C8T7	Protein ELFN1	Elfn1	0.341711	2.1013	0.0418304	0.241469
Q8BIW1	Protein prune homolog	Prune	-0.196024	-2.10018	0.0419343	0.24168
P63254	Cysteine-rich protein 1	Crip1	0.547974	2.09675	0.0422534	0.241844
P97450	ATP synthase-coupling factor 6, mitochondrial	Atp5j	-0.240204	-2.09731	0.0422014	0.241844
Q5SQX6	Cytoplasmic FMR1-interacting protein 2	Cyfip2	-0.137849	-2.09625	0.0423008	0.241844
Q8BHA3	Probable D-tyrosyl-tRNA(Tyr) deacylase 2	Dtd2	0.298274	2.09908	0.0420367	0.241844
Q9JLB0	MAGUK p55 subfamily member 6	Mpp6	-0.16364	-2.09745	0.0421885	0.241844
Q8K0S0	Phytanoyl-CoA hydroxylase-interacting protein	Phyhip	-0.147984	-2.09277	0.0426269	0.24332
Q8JZN7	Mitochondrial Rho GTPase 2	Rhot2	0.355041	2.08874	0.0430082	0.245105
Q8C0D5	Elongation factor Tu GTP-binding domain-containing protein 1	Eftud1	0.344279	2.0865	0.0432204	0.245823
Q9D0T1	NHP2-like protein 1;NHP2-like protein 1, N-terminally processed	Nhp2l1	-0.258026	-2.08597	0.0432714	0.245823
Q91WK2	Eukaryotic translation initiation factor 3 subunit H	Eif3h	0.358396	2.08264	0.0435902	0.247241
Q6PHZ2	Calcium/calmodulin-dependent protein kinase type II subunit delta	Camk2d	-0.219215	-2.08024	0.0438205	0.248154
O35454	Chloride transport protein 6	Clcn6	0.575765	2.07773	0.0440638	0.248595
O89086	RNA-binding protein 3	Rbm3	0.501061	2.07314	0.0445103	0.248595
P12961	Neuroendocrine protein 7B2;N-terminal peptide;C-terminal peptide	Scg5	0.527063	2.07219	0.0446033	0.248595
P49446	Receptor-type tyrosine-protein phosphatase epsilon	Ptpre	0.853242	2.07479	0.0443494	0.248595
Q3TLH4	Protein PRRC2C	Prrc2c	-0.320069	-2.07438	0.0443889	0.248595
Q76MZ3;Q7TNP2	Serine/threonine-protein phosphatase 2A 65 kDa regulatory subunit A alpha isoform	Ppp2r1a	-0.173025	-2.07123	0.0446975	0.248595
Q8BMJ2	Leucine--tRNA ligase, cytoplasmic	Lars	0.180468	2.07618	0.0442142	0.248595
Q8BXR9	Oxysterol-binding protein-related protein 6	Osbpl6	-0.380376	-2.07758	0.0440782	0.248595
Q8CI51	PDZ and LIM domain protein 5	Pdlim5	0.286915	2.07279	0.0445442	0.248595
Q9CPQ1	Cytochrome c oxidase subunit 6C	Cox6c	-0.172238	-2.07573	0.0442574	0.248595
Q9D3D0	Alpha-tocopherol transfer protein-like	Ttpal	-0.458124	-2.0738	0.044446	0.248595
Q9EPW0	Type I inositol 3,4-bisphosphate 4-phosphatase	Inpp4a	-0.187375	-2.07088	0.0447318	0.248595
Q99KJ8	Dynactin subunit 2	Dctn2	-0.126472	-2.0696	0.044858	0.24891
O08749	Dihydrolipoyl dehydrogenase, mitochondrial	Dld	-0.127509	-2.0618	0.0456307	0.251637
Q8BJ42	Disks large-associated protein 2	Dlgap2	-0.246444	-2.06205	0.0456065	0.251637
Q8CIM7	Cytochrome P450 2D26	Cyp2d26	-0.299406	-2.06222	0.0455893	0.251637
Q9Z0F7	Gamma-synuclein	Sncg	-0.479522	-2.06372	0.0454393	0.251637
Q3UYC0	Protein phosphatase 1H	Ppm1h	-0.209033	-2.05786	0.0460266	0.25343
Q8VHH5	Arf-GAP with GTPase, ANK repeat and PH domain-containing protein 3	Agap3	-0.173382	-2.05677	0.0461367	0.253645
P63030	Mitochondrial pyruvate carrier 1	Mpc1	0.587546	2.0543	0.0463863	0.254626
P10126	Elongation factor 1-alpha 1	Eef1a1	0.135049	2.05292	0.0465258	0.254919
Q9QYF1	Retinol dehydrogenase 11	Rdh11	0.414133	2.05237	0.0465821	0.254919
Q9R1Q9	V-type proton ATPase subunit S1	Atp6ap1	-0.367619	-2.04991	0.0468332	0.255902
P49312	Heterogeneous nuclear ribonucleoprotein A1;Heterogeneous nuclear ribonucleoprotein A1, N-terminally processed	Hnrnpa1	-0.122179	-2.04396	0.0474446	0.256178
Q3UVX5;REV__P0DM65	Metabotropic glutamate receptor 5	Grm5	-0.172185	-2.04387	0.0474532	0.256178
Q8BMF4	Dihydrolipoyllysine-residue acetyltransferase component of pyruvate dehydrogenase complex, mitochondrial	Dlat	-0.14332	-2.04696	0.0471349	0.256178
Q8BP48	Methionine aminopeptidase 1	Metap1	-0.290995	-2.0445	0.0473882	0.256178
Q8K3J1	NADH dehydrogenase [ubiquinone] iron-sulfur protein 8, mitochondrial	Ndufs8	-0.183887	-2.04385	0.0474563	0.256178
Q8VE33	Ganglioside-induced differentiation-associated protein 1-like 1	Gdap1l1	-0.175406	-2.0469	0.047141	0.256178
Q91X97	Neurocalcin-delta	Ncald	-0.252722	-2.04727	0.0471029	0.256178
Q9JHG6	Calcipressin-1	Rcan1	-0.392522	-2.04407	0.0474332	0.256178
Q9CQY6	Ubiquinol-cytochrome-c reductase complex assembly factor 2	Uqcc2	-0.228921	-2.04284	0.0475603	0.256281
Q9D855	Cytochrome b-c1 complex subunit 7	Uqcrb	-0.244939	-2.04228	0.0476186	0.256281
Q8VDN2	Sodium/potassium-transporting ATPase subunit alpha-1	Atp1a1	-0.116811	-2.04047	0.0478066	0.256907
Q60963	Platelet-activating factor acetylhydrolase	Pla2g7	0.348368	2.03947	0.0479102	0.257077
Q4KUS2;Q9Z1N9	Protein unc-13 homolog A	Unc13a	-0.210191	-2.03646	0.0482248	0.258378
Q61937	Nucleophosmin	Npm1	0.23715	2.03343	0.0485436	0.25931
Q8CFE4	SCY1-like protein 2	Scyl2	-0.470801	-2.03357	0.0485294	0.25931
P43276	Histone H1.5	Hist1h1b	0.268135	2.03179	0.0487167	0.259826
Q7TNV0	Protein DEK	Dek	0.295015	2.03114	0.0487854	0.259826
P35438	Glutamate receptor ionotropic, NMDA 1	Grin1	-0.168247	-2.03027	0.0488786	0.259935
P56391	Cytochrome c oxidase subunit 6B1	Cox6b1	-0.17706	-2.02952	0.0489581	0.259972
P45591	Cofilin-2	Cfl2	-0.27817	-2.0279	0.0491305	0.260293
P57746	V-type proton ATPase subunit D	Atp6v1d	-0.134334	-2.02758	0.049164	0.260293
P18653;Q9WUT3;Q7TPS0	Ribosomal protein S6 kinase alpha-1;Ribosomal protein S6 kinase alpha-2	Rps6ka1;Rps6ka2	-0.291162	-2.02564	0.0493718	0.260355
Q04899;Q04735	Cyclin-dependent kinase 18	Cdk18	-0.184276	-2.02506	0.0494333	0.260355
Q3ULD5	Methylcrotonoyl-CoA carboxylase beta chain, mitochondrial	Mccc2	0.266436	2.02475	0.0494667	0.260355
Q6R891	Neurabin-2	Ppp1r9b	-0.169671	-2.02486	0.0494548	0.260355
P28660	Nck-associated protein 1	Nckap1	-0.263444	-2.02351	0.0495997	0.260387
P49442	Inositol polyphosphate 1-phosphatase	Inpp1	-0.21346	-2.02181	0.0497829	0.260387
P70175	Disks large homolog 3	Dlg3	-0.131153	-2.02224	0.0497362	0.260387
Q80Y86	Mitogen-activated protein kinase 15	Mapk15	-0.279412	-2.02187	0.0497759	0.260387
Q99NE5	Regulating synaptic membrane exocytosis protein 1	Rims1	-0.171181	-2.02131	0.0498366	0.260387
P70336	Rho-associated protein kinase 2	Rock2	-0.145828	-2.01691	0.0503136	0.261189
Q8BGH2	Sorting and assembly machinery component 50 homolog	Samm50	-0.201362	-2.01519	0.0505009	0.261189
Q8BGK5	Solute carrier family 35 member F1	Slc35f1	0.324947	2.01658	0.0503492	0.261189
Q91VR2	ATP synthase subunit gamma, mitochondrial	Atp5c1	-0.167322	-2.01846	0.0501455	0.261189
Q9D2R0	Acetoacetyl-CoA synthetase	Aacs	0.37528	2.01567	0.0504483	0.261189
Q9D6M3	Mitochondrial glutamate carrier 1	Slc25a22	-0.143172	-2.01869	0.0501203	0.261189
Q9R0U0	Serine/arginine-rich splicing factor 10	Srsf10	0.283084	2.01613	0.0503983	0.261189
O09111	NADH dehydrogenase [ubiquinone] 1 beta subcomplex subunit 11, mitochondrial	Ndufb11	-0.171994	-2.01323	0.0507157	0.261651
Q8VE09	Tetratricopeptide repeat protein 39C	Ttc39c	-0.280902	-2.01304	0.0507365	0.261651
P54071	Isocitrate dehydrogenase [NADP], mitochondrial	Idh2	0.191942	2.01041	0.0510251	0.262057
Q9CR62	Mitochondrial 2-oxoglutarate/malate carrier protein	Slc25a11	-0.164384	-2.01083	0.0509782	0.262057
Q9ES97	Reticulon-3	Rtn3	-0.126155	-2.01032	0.0510349	0.262057
Q80W21	Glutathione S-transferase Mu 7	Gstm7	0.263992	2.00909	0.0511703	0.262376
P24549;O35945	Retinal dehydrogenase 1	Aldh1a1	0.508042	2.00353	0.0517873	0.262962
P35283	Ras-related protein Rab-12	Rab12	-0.211099	-2.00419	0.051714	0.262962
P47757	F-actin-capping protein subunit beta	Capzb	-0.118073	-2.00211	0.0519458	0.262962
P68181	cAMP-dependent protein kinase catalytic subunit beta	Prkacb	-0.148479	-2.00222	0.0519342	0.262962
Q01768	Nucleoside diphosphate kinase B	Nme2	-0.273794	-2.00496	0.0516284	0.262962
Q0VBF8	Protein stum homolog		-0.352831	-2.00619	0.0514917	0.262962
Q80TJ1	Calcium-dependent secretion activator 1	Cadps	-0.131523	-2.00276	0.0518737	0.262962
Q9CS42	Ribose-phosphate pyrophosphokinase 2	Prps2	-0.348848	-2.00501	0.0516223	0.262962
Q9JIG7	Coiled-coil domain-containing protein 22	Ccdc22	1.24082	2.00573	0.0515427	0.262962
Q80X90	Filamin-B	Flnb	0.352796	1.99986	0.0521988	0.26387
O70480	Vesicle-associated membrane protein 4	Vamp4	-0.543465	-1.99392	0.0528695	0.264141
P09103	Protein disulfide-isomerase	P4hb	0.16364	1.99512	0.0527326	0.264141
P23953;Q8VCT4;Q8VCC2;Q64176;Q91WU0	Carboxylesterase 1C	Ces1c	0.485782	1.99484	0.0527654	0.264141
P50518;Q9D593	V-type proton ATPase subunit E 1	Atp6v1e1	-0.112837	-1.99416	0.0528424	0.264141
P97492	Regulator of G-protein signaling 14	Rgs14	0.32027	1.9935	0.0529168	0.264141
Q80WT0	Junctophilin-4	Jph4	0.252689	1.99511	0.0527344	0.264141
Q9DB70	FUN14 domain-containing protein 1	Fundc1	0.72056	1.99509	0.052737	0.264141
Q9ERD7	Tubulin beta-3 chain	Tubb3	-0.12859	-1.99667	0.0525573	0.264141
Q9ES28	Rho guanine nucleotide exchange factor 7	Arhgef7	-0.16558	-1.99651	0.0525763	0.264141
Q9WVQ1;P46938	Membrane-associated guanylate kinase, WW and PDZ domain-containing protein 2	Magi2	-0.317204	-1.99099	0.0532031	0.2652
Q8BHL8	Proteasome inhibitor PI31 subunit	Psmf1	0.322375	1.98994	0.0533234	0.26543
Q99JY9	Actin-related protein 3	Actr3	-0.129272	-1.98836	0.0535039	0.265959
P56564	Excitatory amino acid transporter 1	Slc1a3	0.186202	1.98026	0.0544406	0.267642
P97372	Proteasome activator complex subunit 2	Psme2	0.733123	1.98118	0.0543332	0.267642
Q61330	Contactin-2	Cntn2	-0.581305	-1.98051	0.0544118	0.267642
Q7TSH2	Phosphorylase b kinase regulatory subunit beta	Phkb	0.265859	1.98151	0.0542954	0.267642
Q8C6G8	WD repeat-containing protein 26	Wdr26	-0.421585	-1.98039	0.054425	0.267642
Q8QZY9	Splicing factor 3B subunit 4	Sf3b4	0.522253	1.98254	0.054176	0.267642
Q8R0G9	Nuclear pore complex protein Nup133	Nup133	0.427811	1.98037	0.0544283	0.267642
Q9JMH9	Unconventional myosin-XVIIIa	Myo18a	-0.140389	-1.98236	0.0541963	0.267642
P62307	Small nuclear ribonucleoprotein F	Snrpf	-0.361824	-1.97605	0.0549333	0.268588
Q8C419	Probable G-protein coupled receptor 158	Gpr158	-0.173972	-1.97617	0.0549188	0.268588
Q91YE6	Importin-9	Ipo9	-0.258995	-1.97623	0.0549117	0.268588
Q9CRB8	Mitochondrial fission process protein 1	Mtfp1	0.32574	1.97793	0.0547124	0.268588
P09528	Ferritin heavy chain;Ferritin heavy chain, N-terminally processed	Fth1	-0.298811	-1.97453	0.055111	0.268946
P46737	Lys-63-specific deubiquitinase BRCC36	Brcc3	-0.230779	-1.97415	0.0551569	0.268946
Q80V26	Inositol monophosphatase 3	Impad1	0.240962	1.97335	0.0552501	0.269034
Q9QUH0	Glutaredoxin-1	Glrx	-0.217587	-1.97209	0.055399	0.269393
P61226	Ras-related protein Rap-2b	Rap2b	-0.160294	-1.97021	0.055622	0.269744
Q68FF6;Q9JLQ2	ARF GTPase-activating protein GIT1	Git1	-0.160759	-1.9708	0.0555517	0.269744
P62322	U6 snRNA-associated Sm-like protein LSm5	Lsm5	-0.328559	-1.96628	0.0560901	0.271646
P35276	Ras-related protein Rab-3D	Rab3d	-0.811652	-1.96438	0.0563174	0.272011
Q8CFV4	Neuritin	Nrn1	-0.274224	-1.9645	0.0563032	0.272011
P26040	Ezrin	Ezr	0.226033	1.96284	0.0565033	0.272541
Q7M6Y3	Phosphatidylinositol-binding clathrin assembly protein	Picalm	0.307485	1.95928	0.0569325	0.274221
Q9D415	Disks large-associated protein 1	Dlgap1	-0.208203	-1.95868	0.0570049	0.274221
P12970	60S ribosomal protein L7a	Rpl7a	0.182311	1.95635	0.0572879	0.275208
Q3TEL6	RING finger protein 157	Rnf157	0.309638	1.95447	0.0575176	0.275208
Q5DTT2	PH and SEC7 domain-containing protein 1	Psd	-0.296637	-1.95531	0.0574154	0.275208
Q9Z1X4	Interleukin enhancer-binding factor 3	Ilf3	-0.254199	-1.95451	0.0575125	0.275208
Q9JLN9	Serine/threonine-protein kinase mTOR	Mtor	-0.272187	-1.95286	0.0577141	0.275457
Q9QYR6	Microtubule-associated protein 1A;MAP1A heavy chain;MAP1 light chain LC2	Map1a	-0.109542	-1.95278	0.0577237	0.275457
Q9DBL7	Bifunctional coenzyme A synthase;Phosphopantetheine adenylyltransferase;Dephospho-CoA kinase	Coasy	0.180471	1.94874	0.0582213	0.277462
O09172	Glutamate--cysteine ligase regulatory subunit	Gclm	0.601891	1.94489	0.0586983	0.279363
P60469	Liprin-alpha-3	Ppfia3	-0.156174	-1.94178	0.0590854	0.280832
P97429	Annexin A4	Anxa4	0.524526	1.93854	0.0594925	0.282195
Q45VK7	Cytoplasmic dynein 2 heavy chain 1	Dync2h1	0.447403	1.93824	0.0595298	0.282195
Q80TL4	Protein KIAA1045	Kiaa1045	-0.148538	-1.93743	0.0596318	0.282304
Q8CAQ8	MICOS complex subunit Mic60	Immt	-0.106486	-1.93625	0.0597801	0.282633
P05064	Fructose-bisphosphate aldolase A	Aldoa	-0.154102	-1.93511	0.0599246	0.282942
P85094	Isochorismatase domain-containing protein 2A, mitochondrial	Isoc2a	0.238773	1.93411	0.0600513	0.283167
Q8BFQ8	Parkinson disease 7 domain-containing protein 1	Pddc1	-0.247017	-1.92956	0.0606301	0.285145
Q9D358	Low molecular weight phosphotyrosine protein phosphatase	Acp1	-0.210273	-1.93	0.0605748	0.285145
Q9CXU9	Eukaryotic translation initiation factor 1b	Eif1b	0.327955	1.92602	0.061085	0.286907
P68368	Tubulin alpha-4A chain	Tuba4a	-0.143688	-1.9239	0.0613582	0.287813
P67778	Prohibitin	Phb	-0.141011	-1.92256	0.061531	0.288245
Q8C878	NEDD8-activating enzyme E1 catalytic subunit	Uba3	-0.343352	-1.9213	0.0616947	0.288634
P43274	Histone H1.4	Hist1h1e	0.234541	1.91995	0.0618701	0.289077
Q9CQQ7	ATP synthase F(0) complex subunit B1, mitochondrial	Atp5f1	-0.178709	-1.91877	0.0620231	0.289414
P97494	Glutamate--cysteine ligase catalytic subunit	Gclc	-0.170934	-1.9166	0.0623064	0.290357
O35286	Pre-mRNA-splicing factor ATP-dependent RNA helicase DHX15	Dhx15	-0.417862	-1.91293	0.062789	0.291804
Q8BTZ7	Mannose-1-phosphate guanyltransferase beta	Gmppb	-0.383519	-1.91161	0.0629631	0.291804
Q9CPU4	Microsomal glutathione S-transferase 3	Mgst3	-0.24106	-1.91031	0.0631343	0.291804
Q9CQ79	Thioredoxin domain-containing protein 9	Txndc9	0.54413	1.91066	0.0630883	0.291804
Q9CQS4	Solute carrier family 25 member 46	Slc25a46	-0.261092	-1.91275	0.0628121	0.291804
Q9D0E3	LysM and putative peptidoglycan-binding domain-containing protein 1	Lysmd1	-0.244111	-1.9113	0.0630029	0.291804
Q9QYB8	Beta-adducin	Add2	-0.123872	-1.90991	0.0631875	0.291804
P59017	Bcl-2-like protein 13	Bcl2l13	-0.264595	-1.90908	0.0632976	0.291936
Q91VJ5	Polyglutamine-binding protein 1	Pqbp1	0.358433	1.90355	0.0640339	0.294951
Q9DCT2	NADH dehydrogenase [ubiquinone] iron-sulfur protein 3, mitochondrial	Ndufs3	-0.159122	-1.90281	0.0641338	0.295032
O70318	Band 4.1-like protein 2	Epb41l2	0.140325	1.89681	0.0649423	0.297071
P19157;P46425	Glutathione S-transferase P 1;Glutathione S-transferase P 2	Gstp1;Gstp2	0.146028	1.89695	0.064924	0.297071
Q7TQH0	Ataxin-2-like protein	Atxn2l	0.215879	1.8977	0.0648223	0.297071
Q9DCD0	6-phosphogluconate dehydrogenase, decarboxylating	Pgd	0.173788	1.89798	0.0647841	0.297071
Q9JJ43;Q8BP71	RNA binding protein fox-1 homolog 1;RNA binding protein fox-1 homolog 2	Rbfox1;Rbfox2	-0.493037	-1.89645	0.0649921	0.297071
Q3TUH1	Phosphatidate cytidylyltransferase, mitochondrial	Tamm41	-0.421602	-1.89381	0.06535	0.298326
O70251	Elongation factor 1-beta	Eef1b	-0.202388	-1.89177	0.0656291	0.299034
Q6ZPF3	T-lymphoma invasion and metastasis-inducing protein 2	Tiam2	-0.375854	-1.89085	0.0657558	0.299034
Q99M71	Mammalian ependymin-related protein 1	Epdr1	0.289522	1.89123	0.0657026	0.299034
Q61239	Protein farnesyltransferase/geranylgeranyltransferase type-1 subunit alpha	Fnta	0.421557	1.88904	0.0660038	0.299401
Q8K1M6	Dynamin-1-like protein	Dnm1l	-0.105745	-1.88931	0.065967	0.299401
P70429	Ena/VASP-like protein	Evl	0.462159	1.8882	0.0661192	0.299545
P62874;Q61011	Guanine nucleotide-binding protein G(I)/G(S)/G(T) subunit beta-1	Gnb1	-0.117346	-1.8857	0.0664635	0.300344
Q91VA6	Polymerase delta-interacting protein 2	Poldip2	-0.282082	-1.8861	0.0664086	0.300344
P08122	Collagen alpha-2(IV) chain;Canstatin	Col4a2	0.484044	1.88148	0.06705	0.300717
P0C192;Q8C031;Q99PH1	Leucine-rich repeat-containing protein 4B	Lrrc4b	0.261519	1.88176	0.0670109	0.300717
Q62084	Protein phosphatase 1 regulatory subunit 14B	Ppp1r14b	0.157111	1.88404	0.0666944	0.300717
Q8C854	Myelin expression factor 2	Myef2	0.219933	1.88148	0.0670495	0.300717
Q8K157	Aldose 1-epimerase	Galm	0.409434	1.88234	0.0669307	0.300717
Q8K212	Phosphofurin acidic cluster sorting protein 1	Pacs1	-0.140173	-1.88296	0.0668433	0.300717
Q02248	Catenin beta-1	Ctnnb1	-0.124114	-1.88085	0.0671382	0.300736
P03930	ATP synthase protein 8	Mtatp8	-0.323838	-1.87657	0.0677365	0.30159
Q5SYD0	Unconventional myosin-Id	Myo1d	0.317406	1.87838	0.0674835	0.30159
Q8C8T8	Pre-rRNA-processing protein TSR2 homolog	Tsr2	-0.314022	-1.87716	0.067654	0.30159
Q9CQV6	Microtubule-associated proteins 1A/1B light chain 3B	Map1lc3b	-0.293741	-1.87648	0.0677502	0.30159
Q9D4H8	Cullin-2	Cul2	-0.380186	-1.87676	0.0677104	0.30159
P55088	Aquaporin-4	Aqp4	0.584917	1.87472	0.067997	0.302312
Q0VGY8	Protein TANC1	Tanc1	0.246364	1.87307	0.0682305	0.302974
Q923Z0	G-protein coupled receptor family C group 5 member B	Gprc5b	0.313297	1.8681	0.0689368	0.305731
Q6PGN3	Serine/threonine-protein kinase DCLK2	Dclk2	-0.19792	-1.86734	0.0690445	0.305829
Q3V0Q1	Dynein heavy chain 12, axonemal	Dnah12	0.475944	1.86645	0.0691718	0.306015
Q8R3B1	1-phosphatidylinositol 4,5-bisphosphate phosphodiesterase delta-1	Plcd1	0.319157	1.86547	0.0693126	0.306259
O09061	Proteasome subunit beta type-1	Psmb1	0.120764	1.86208	0.0697996	0.307798
O35857	Mitochondrial import inner membrane translocase subunit TIM44	Timm44	-0.215971	-1.86185	0.069833	0.307798
P13595	Neural cell adhesion molecule 1	Ncam1	-0.10283	-1.85995	0.0701079	0.30863
O88643	Serine/threonine-protein kinase PAK 1	Pak1	-0.124632	-1.85854	0.0703122	0.308834
Q7TT37	Elongator complex protein 1	Ikbkap	-0.361881	-1.85844	0.0703268	0.308834
Q60900	ELAV-like protein 3	Elavl3	-0.225723	-1.85783	0.0704154	0.308844
O55131	Septin-7	2023-09-07	-0.123708	-1.85663	0.0705891	0.309227
P61957;Q9Z172	Small ubiquitin-related modifier 2;Small ubiquitin-related modifier 3	Sumo2;Sumo3	-0.345139	-1.85535	0.0707753	0.309563
Q9Z130	Heterogeneous nuclear ribonucleoprotein D-like	Hnrnpdl	-0.168586	-1.85492	0.0708387	0.309563
Q91XM9	Disks large homolog 2	Dlg2	-0.118727	-1.85393	0.0709831	0.309584
Q9Z2I8	Succinyl-CoA ligase [GDP-forming] subunit beta, mitochondrial	Suclg2	0.287744	1.8537	0.0710166	0.309584
P19246;Q3TTY5;CON__Q7RTS7;CON__Q3TTY5	Neurofilament heavy polypeptide	Nefh	0.205951	1.85231	0.0712201	0.309716
Q61598	Rab GDP dissociation inhibitor beta	Gdi2	0.121736	1.8526	0.0711777	0.309716
G3XA57	Rab11 family-interacting protein 2	Rab11fip2	-0.348443	-1.85027	0.0715199	0.310643
Q8CHK3	Lysophospholipid acyltransferase 7	Mboat7	0.506815	1.8472	0.0719743	0.311106
Q8R5M8	Cell adhesion molecule 1	Cadm1	-0.158159	-1.84751	0.071927	0.311106
Q9Z0E6	Interferon-induced guanylate-binding protein 2	Gbp2	1.82152	1.84811	0.0718386	0.311106
Q9Z239	Phospholemman	Fxyd1	0.331405	1.84844	0.0717905	0.311106
Q0KL02	Triple functional domain protein	Trio	-0.143699	-1.84519	0.0722708	0.312011
P58802	TBC1 domain family member 10A	Tbc1d10a	-0.346789	-1.84428	0.0724065	0.312091
P60843	Eukaryotic initiation factor 4A-I	Eif4a1	0.104308	1.8439	0.0724636	0.312091
Q99JX3	Golgi reassembly-stacking protein 2	Gorasp2	0.140318	1.8407	0.0729417	0.313217
Q9CR57	60S ribosomal protein L14	Rpl14	0.344896	1.84039	0.0729878	0.313217
Q9Z0R4;CON__ENSEMBL:ENSBTAP00000001528	Intersectin-1	Itsn1	-0.124424	-1.84081	0.0729246	0.313217
E9PV86		Mctp1	-0.205241	-1.83672	0.0735392	0.313406
P50428	Arylsulfatase A	Arsa	0.373155	1.83602	0.0736447	0.313406
P62878	E3 ubiquitin-protein ligase RBX1;E3 ubiquitin-protein ligase RBX1, N-terminally processed	Rbx1	-0.164982	-1.83852	0.0732678	0.313406
Q3UE31	Uncharacterized protein KIAA0930 homolog		-1.01261	-1.83615	0.0736243	0.313406
Q9CWE0	Mitochondrial fission regulator 1-like	Mtfr1l	-0.230738	-1.83621	0.073616	0.313406
Q9DB77	Cytochrome b-c1 complex subunit 2, mitochondrial	Uqcrc2	-0.114359	-1.83682	0.0735242	0.313406
Q9JL62	Glycolipid transfer protein	Gltp	0.467877	1.83642	0.0735843	0.313406
P54728	UV excision repair protein RAD23 homolog B	Rad23b	-0.389149	-1.83349	0.0740277	0.313916
Q69Z23	Dynein heavy chain 17, axonemal	Dnah17	-0.26001	-1.83444	0.0738836	0.313916
Q8K2H2	OTU domain-containing protein 6B	Otud6b	0.412301	1.83395	0.0739566	0.313916
P09925	Surfeit locus protein 1	Surf1	0.3021	1.83265	0.0741549	0.314083
Q99N28	Cell adhesion molecule 3	Cadm3	-0.147193	-1.83135	0.0743518	0.314545
O88543	COP9 signalosome complex subunit 3	Cops3	0.353707	1.82935	0.0746561	0.314829
Q62419	Endophilin-A2	Sh3gl1	-0.216639	-1.8286	0.0747707	0.314829
Q8R164	Valacyclovir hydrolase	Bphl	-0.227684	-1.82878	0.0747441	0.314829
Q922H2	[Pyruvate dehydrogenase (acetyl-transferring)] kinase isozyme 3, mitochondrial	Pdk3	-0.240158	-1.82997	0.0745629	0.314829
O54988	STE20-like serine/threonine-protein kinase	Slk	-0.248375	-1.82325	0.0755923	0.315718
P62881	Guanine nucleotide-binding protein subunit beta-5	Gnb5	-0.137004	-1.82651	0.0750921	0.315718
Q8C0Q9	Rap guanine nucleotide exchange factor 5	Rapgef5	-0.364681	-1.82443	0.0754106	0.315718
Q8K341	Alpha-tubulin N-acetyltransferase 1	Atat1	-0.22464	-1.82356	0.0755446	0.315718
Q8VEM8	Phosphate carrier protein, mitochondrial	Slc25a3	-0.145223	-1.82507	0.0753125	0.315718
Q99KU0	Vacuole membrane protein 1	Vmp1	0.319263	1.82379	0.0755094	0.315718
Q9D8Y1	Transmembrane protein 126A	Tmem126a	-0.263806	-1.82321	0.0755993	0.315718
Q62442	Vesicle-associated membrane protein 1	Vamp1	-0.181795	-1.8215	0.0758638	0.316453
P62849	40S ribosomal protein S24	Rps24	-0.265044	-1.82061	0.0760019	0.31666
Q3USB7	Inactive phospholipase C-like protein 1	Plcl1	0.260835	1.81909	0.076237	0.31727
Q80TR1	Latrophilin-1	Lphn1	-0.166449	-1.8155	0.0767961	0.319226
P60710	Actin, cytoplasmic 1;Actin, cytoplasmic 1, N-terminally processed	Actb	-0.231249	-1.81433	0.0769805	0.31956
Q8BGT5	Alanine aminotransferase 2	Gpt2	-0.273689	-1.81385	0.077055	0.31956
Q2TPA8	Hydroxysteroid dehydrogenase-like protein 2	Hsdl2	0.465028	1.81148	0.0774266	0.320358
Q9Z2I9	Succinyl-CoA ligase [ADP-forming] subunit beta, mitochondrial	Sucla2	-0.110885	-1.81164	0.0774028	0.320358
O08532	Voltage-dependent calcium channel subunit alpha-2/delta-1;Voltage-dependent calcium channel subunit alpha-2-1;Voltage-dependent calcium channel subunit delta-1	Cacna2d1	-0.115287	-1.80938	0.0777589	0.321126
Q8BJU0	Small glutamine-rich tetratricopeptide repeat-containing protein alpha	Sgta	-0.170412	-1.8086	0.0778813	0.321126
Q9R0Q3	Transmembrane emp24 domain-containing protein 2	Tmed2	0.623363	1.80909	0.0778052	0.321126
O08756	3-hydroxyacyl-CoA dehydrogenase type-2	Hsd17b10	-0.152445	-1.80592	0.0783071	0.321268
Q6ZQ58	La-related protein 1	Larp1	-0.33627	-1.80729	0.0780902	0.321268
Q71LX4	Talin-2	Tln2	-0.10336	-1.80643	0.0782256	0.321268
Q8BLF1	Neutral cholesterol ester hydrolase 1	Nceh1	-0.191184	-1.80556	0.0783646	0.321268
Q8JZQ2	AFG3-like protein 2	Afg3l2	-0.174247	-1.80715	0.0781114	0.321268
Q9D1C3	Protein preY, mitochondrial	Pyurf	-0.481729	-1.80253	0.0788474	0.322878
O35098	Dihydropyrimidinase-related protein 4	Dpysl4	-0.103712	-1.80087	0.0791137	0.323598
Q61137	Astrotactin-1	Astn1	-0.175785	-1.79974	0.0792944	0.323967
Q9ET43	Claudin-12	Cldn12	-0.222376	-1.79507	0.0800485	0.326674
Q8BW96	Calcium/calmodulin-dependent protein kinase type 1D	Camk1d	-0.184138	-1.7942	0.080189	0.326875
Q3UVL4	Vacuolar protein sorting-associated protein 51 homolog	Vps51	0.181812	1.78991	0.0808876	0.328973
Q80SW1	Putative adenosylhomocysteinase 2	Ahcyl1	-0.146178	-1.79047	0.080796	0.328973
Q3UFK8	FERM domain-containing protein 8	Frmd8	0.328667	1.78813	0.0811788	0.32964
Q64299	Protein NOV homolog	Nov	0.41297	1.78778	0.0812356	0.32964
P41242	Megakaryocyte-associated tyrosine-protein kinase	Matk	0.298614	1.78331	0.0819712	0.332248
Q9DC16	Endoplasmic reticulum-Golgi intermediate compartment protein 1	Ergic1	-0.173747	-1.78274	0.0820646	0.33225
Q811D0	Disks large homolog 1	Dlg1	-0.133956	-1.78135	0.0822959	0.332435
Q9JIW9	Ras-related protein Ral-B	Ralb	0.320668	1.78169	0.0822393	0.332435
P0C6F1	Dynein heavy chain 2, axonemal	Dnah2	0.535729	1.7773	0.0829685	0.334554
Q9QZ88	Vacuolar protein sorting-associated protein 29	Vps29	0.180172	1.77707	0.0830076	0.334554
P39054	Dynamin-2	Dnm2	0.30952	1.77573	0.083231	0.335077
Q9EST5	Acidic leucine-rich nuclear phosphoprotein 32 family member B	Anp32b	0.66146	1.77482	0.0833833	0.335313
O70591	Prefoldin subunit 2	Pfdn2	-0.216161	-1.77301	0.0836878	0.33616
Q6A065	Centrosomal protein of 170 kDa	Cep170	0.225901	1.77229	0.0838093	0.336271
Q9QZQ8	Core histone macro-H2A.1	H2afy	-0.170105	-1.77151	0.0839394	0.336415
Q8BTY2	Sodium bicarbonate cotransporter 3	Slc4a7	-0.465811	-1.76784	0.0845602	0.338524
P63040	Complexin-1	Cplx1	-0.179673	-1.76697	0.0847083	0.338739
P61164	Alpha-centractin	Actr1a	0.150063	1.76633	0.0848173	0.338796
Q8BQZ4	Ral GTPase-activating protein subunit beta	Ralgapb	-0.367812	-1.7651	0.0850253	0.339248
P05213	Tubulin alpha-1B chain	Tuba1b	-0.0946922	-1.7632	0.0853505	0.340167
Q9D1X0	Nucleolar protein 3	Nol3	0.160426	1.76254	0.0854637	0.340239
Q91VM9	Inorganic pyrophosphatase 2, mitochondrial	Ppa2	-0.182988	-1.76148	0.0856445	0.34058
Q9WVA2;Q4FZG7	Mitochondrial import inner membrane translocase subunit Tim8 A	Timm8a1	-0.15471	-1.76086	0.0857515	0.340627
P28656	Nucleosome assembly protein 1-like 1	Nap1l1	0.178651	1.7598	0.0859336	0.340972
Q6NS60	F-box only protein 41	Fbxo41	-0.273534	-1.75923	0.0860315	0.340982
P70398	Probable ubiquitin carboxyl-terminal hydrolase FAF-X	Usp9x	-0.161611	-1.75721	0.0863794	0.341566
P70441	Na(+)/H(+) exchange regulatory cofactor NHE-RF1	Slc9a3r1	0.148667	1.75731	0.086361	0.341566
Q6P1D5	Seizure 6-like protein	Sez6l	0.297407	1.75671	0.0864651	0.341566
P11798	Calcium/calmodulin-dependent protein kinase type II subunit alpha	Camk2a	-0.141149	-1.75563	0.0866527	0.341717
Q8C7R4	Ubiquitin-like modifier-activating enzyme 6	Uba6	-0.27818	-1.75539	0.0866943	0.341717
Q03137;P29319	Ephrin type-A receptor 4	Epha4	-0.132688	-1.75401	0.0869325	0.342279
Q8CIB5	Fermitin family homolog 2	Fermt2	0.210027	1.753	0.0871077	0.342592
Q2NL51	Glycogen synthase kinase-3 alpha	Gsk3a	-0.204175	-1.7512	0.087421	0.343032
Q6PD03	Serine/threonine-protein phosphatase 2A 56 kDa regulatory subunit alpha isoform	Ppp2r5a	-0.285608	-1.75071	0.0875072	0.343032
Q8C8R3	Ankyrin-2	Ank2	-0.0898942	-1.75116	0.087428	0.343032
Q8CGK3	Lon protease homolog, mitochondrial	Lonp1	-0.162893	-1.74947	0.0877239	0.343505
Q9CRB9	MICOS complex subunit Mic19	Chchd3	-0.157697	-1.74827	0.0879347	0.343954
Q8C2Q3	RNA-binding protein 14	Rbm14	-0.201226	-1.74715	0.088131	0.344346
Q99PL5	Ribosome-binding protein 1	Rrbp1	0.451013	1.74596	0.0883401	0.344787
P08113	Endoplasmin	Hsp90b1	0.262737	1.74496	0.0885154	0.345094
Q60737	Casein kinase II subunit alpha	Csnk2a1	-0.131818	-1.74403	0.088679	0.345356
P26350	Prothymosin alpha;Prothymosin alpha, N-terminally processed;Thymosin alpha	Ptma	1.28281	1.74267	0.0889195	0.345916
P63250	G protein-activated inward rectifier potassium channel 1	Kcnj3	-0.358702	-1.74135	0.089153	0.346255
Q61481	Calcium/calmodulin-dependent 3,5-cyclic nucleotide phosphodiesterase 1A	Pde1a	-0.219957	-1.74109	0.0892	0.346255
Q6NZM9	Histone deacetylase 4	Hdac4	-0.357829	-1.73987	0.0894153	0.346714
Q03517	Secretogranin-2;Secretoneurin;Manserin	Scg2	-0.22329	-1.73912	0.0895503	0.346862
Q14BB9	MAP6 domain-containing protein 1	Map6d1	-0.178558	-1.73821	0.089711	0.347109
Q60668	Heterogeneous nuclear ribonucleoprotein D0	Hnrnpd	-0.12583	-1.73657	0.0900043	0.347868
Q99LG2	Transportin-2	Tnpo2	-0.257609	-1.7356	0.0901766	0.348158
Q9D4H1	Exocyst complex component 2	Exoc2	-0.235991	-1.73401	0.0904619	0.348883
Q61249	Immunoglobulin-binding protein 1	Igbp1	0.543525	1.731	0.0910043	0.349249
Q61361	Brevican core protein	Bcan	-0.132821	-1.73106	0.0909921	0.349249
Q8BML9		Qars	-0.649274	-1.73055	0.0910846	0.349249
Q8BW41	Protein O-linked-mannose beta-1,4-N-acetylglucosaminyltransferase 2	Pomgnt2	-0.328667	-1.72969	0.0912401	0.349249
Q8K0T4	Katanin p60 ATPase-containing subunit A-like 1	Katnal1	-0.178095	-1.73229	0.090771	0.349249
Q9CR68	Cytochrome b-c1 complex subunit Rieske, mitochondrial;Cytochrome b-c1 complex subunit 11	Uqcrfs1	-0.154551	-1.73002	0.0911811	0.349249
Q9D9V3	Ethylmalonyl-CoA decarboxylase	Echdc1	0.159986	1.73113	0.090981	0.349249
Q9WV80	Sorting nexin-1	Snx1	0.220872	1.7281	0.0915285	0.349979
P70372	ELAV-like protein 1	Elavl1	-0.142266	-1.72435	0.0922086	0.351828
Q60864	Stress-induced-phosphoprotein 1	Stip1	-0.104462	-1.72465	0.0921548	0.351828
B2RXS4	Plexin-B2	Plxnb2	0.261374	1.72277	0.0924982	0.352557
P26043	Radixin	Rdx	0.216265	1.72081	0.0928558	0.353168
Q9JHI5	Isovaleryl-CoA dehydrogenase, mitochondrial	Ivd	0.206844	1.72094	0.0928334	0.353168
P70188	Kinesin-associated protein 3	Kifap3	-0.357734	-1.71744	0.0934758	0.355032
Q3V1L4	Cytosolic purine 5-nucleotidase	Nt5c2	-0.360998	-1.71707	0.0935444	0.355032
P17439	Glucosylceramidase	Gba	0.306584	1.71402	0.0941084	0.356417
Q9D708		S100a16	0.207895	1.71432	0.0940525	0.356417
Q99LD4	COP9 signalosome complex subunit 1	Gps1	0.248896	1.71219	0.094449	0.357329
Q921G7	Electron transfer flavoprotein-ubiquinone oxidoreductase, mitochondrial	Etfdh	-0.131217	-1.7109	0.0946889	0.357858
G3X9J0		Sipa1l3	-0.195255	-1.70885	0.0950719	0.358548
P06151;P00342	L-lactate dehydrogenase A chain	Ldha	-0.140289	-1.70896	0.0950514	0.358548
Q60932	Voltage-dependent anion-selective channel protein 1	Vdac1	-0.10891	-1.70824	0.0951853	0.358598
Q920P5	Adenylate kinase isoenzyme 5	Ak5	-0.14576	-1.70749	0.0953253	0.358748
Q8CHT0	Delta-1-pyrroline-5-carboxylate dehydrogenase, mitochondrial	Aldh4a1	0.437197	1.7057	0.0956609	0.359633
Q6ZQ29	Serine/threonine-protein kinase TAO2	Taok2	0.233657	1.70434	0.0959169	0.360217
P68372	Tubulin beta-4B chain	Tubb4b	-0.0823454	-1.70151	0.0964524	0.361091
Q8CH18	Cell division cycle and apoptosis regulator protein 1	Ccar1	0.256772	1.70254	0.0962573	0.361091
Q99LF4	tRNA-splicing ligase RtcB homolog	Rtcb	-0.103192	-1.7016	0.0964348	0.361091
P31650;P31649;O35316;Q8VBW1;Q61327;O55192;P31651	Sodium- and chloride-dependent GABA transporter 3	Slc6a11	-0.185926	-1.69867	0.0969916	0.361951
Q8VDM4	26S proteasome non-ATPase regulatory subunit 2	Psmd2	-0.0976957	-1.69944	0.0968444	0.361951
Q91XU3	Phosphatidylinositol 5-phosphate 4-kinase type-2 gamma	Pip4k2c	-0.259269	-1.69764	0.0971877	0.361951
Q9D6Y9	1,4-alpha-glucan-branching enzyme	Gbe1	0.351054	1.69817	0.097085	0.361951
Q9ER72	Cysteine--tRNA ligase, cytoplasmic	Cars	0.22519	1.698	0.0971175	0.361951
P51880	Fatty acid-binding protein, brain	Fabp7	0.244045	1.69587	0.097524	0.362672
Q5HZI2	C2 calcium-dependent domain-containing protein 4C	C2cd4cC2CD4 family	-0.281141	-1.69517	0.0976587	0.362672
Q8VDQ1	Prostaglandin reductase 2	Ptgr2	0.255696	1.69503	0.0976852	0.362672
Q9JHW4	Selenocysteine-specific elongation factor	Eefsec	0.356655	1.69418	0.0978477	0.362898
Q9CRC9	Glucosamine-6-phosphate isomerase 2	Gnpda2	0.311778	1.69085	0.0984863	0.364254
Q9D7X1	BTB/POZ domain-containing protein KCTD4	Kctd4	-0.202693	-1.69138	0.0983855	0.364254
Q9JLZ3	Methylglutaconyl-CoA hydratase, mitochondrial	Auh	-0.160312	-1.69069	0.0985186	0.364254
Q6PGB6	N-alpha-acetyltransferase 50	Naa50	-0.308804	-1.68931	0.0987846	0.364861
P60840	Alpha-endosulfine	Ensa	-0.209146	-1.68745	0.0991426	0.365806
P10649;P19639;O35660	Glutathione S-transferase Mu 1	Gstm1	0.136784	1.68634	0.099358	0.366223
P47857	ATP-dependent 6-phosphofructokinase, muscle type	Pfkm	-0.0951367	-1.68477	0.0996627	0.366287
Q69ZK9	Neuroligin-2	Nlgn2	-0.205457	-1.68548	0.0995259	0.366287
Q9Z218	Dipeptidyl aminopeptidase-like protein 6	Dpp6	-0.135675	-1.68467	0.0996824	0.366287
Q9D2N4;O70585	Dystrobrevin alpha	Dtna	0.241617	1.68076	0.100446	0.368714
Q61704;CON__Q0V8M9	Inter-alpha-trypsin inhibitor heavy chain H3	Itih3	0.45296	1.67851	0.100887	0.369431
Q61771;O35066	Kinesin-like protein KIF3B;Kinesin-like protein KIF3B, N-terminally processed	Kif3b	-0.278808	-1.67766	0.101054	0.369431
Q80YN3	Breast carcinoma-amplified sequence 1 homolog	Bcas1	0.234863	1.67766	0.101053	0.369431
Q9Z1J3	Cysteine desulfurase, mitochondrial	Nfs1	-0.291056	-1.67916	0.10076	0.369431
O70152	Dolichol-phosphate mannosyltransferase subunit 1	Dpm1	0.389056	1.67616	0.10135	0.370133
P54775	26S protease regulatory subunit 6B	Psmc4	-0.122756	-1.67449	0.101679	0.370958
E9QAT4		Sec16a	0.290768	1.67347	0.101881	0.371317
O89114	DnaJ homolog subfamily B member 5	Dnajb5	0.229741	1.67181	0.102209	0.371378
P47911	60S ribosomal protein L6	Rpl6	-0.204873	-1.6723	0.102113	0.371378
P62852	40S ribosomal protein S25	Rps25	-0.214449	-1.67246	0.102081	0.371378
P97318	Disabled homolog 1	Dab1	0.234064	1.67048	0.102474	0.371962
Q8CGU1	Calcium-binding and coiled-coil domain-containing protein 1	Calcoco1	0.228125	1.66963	0.102644	0.372043
Q9DBR1	5-3 exoribonuclease 2	Xrn2	0.339361	1.66932	0.102704	0.372043
Q9CQJ8	NADH dehydrogenase [ubiquinone] 1 beta subcomplex subunit 9	Ndufb9	-0.237551	-1.66781	0.103006	0.372758
Q01065	Calcium/calmodulin-dependent 3,5-cyclic nucleotide phosphodiesterase 1B	Pde1b	-0.205963	-1.66673	0.103223	0.373165
Q61768	Kinesin-1 heavy chain	Kif5b	0.234148	1.6649	0.103589	0.374112
O35841	Apoptosis inhibitor 5	Api5	0.219341	1.66226	0.104121	0.374774
P01864;P01863;P01865	Ig gamma-2A chain C region secreted form		1.0338	1.65938	0.104702	0.374774
P60521	Gamma-aminobutyric acid receptor-associated protein-like 2	Gabarapl2	-0.316363	-1.6631	0.103952	0.374774
P62320	Small nuclear ribonucleoprotein Sm D3	Snrpd3	-0.229369	-1.65977	0.104624	0.374774
P83882	60S ribosomal protein L36a	Rpl36a	-0.516445	-1.66133	0.104309	0.374774
Q3TDN2	FAS-associated factor 2	Faf2	-0.189368	-1.65932	0.104715	0.374774
Q99KK7	Dipeptidyl peptidase 3	Dpp3	0.168626	1.66175	0.104223	0.374774
Q9DB27;Q9CQ21	Malignant T-cell-amplified sequence 1	Mcts1	-0.179428	-1.65941	0.104698	0.374774
Q9WVE8	Protein kinase C and casein kinase substrate in neurons protein 2	Pacsin2	-0.18342	-1.6628	0.104012	0.374774
Q80Z38	SH3 and multiple ankyrin repeat domains protein 2	Shank2	-0.154007	-1.65824	0.104934	0.37511
Q9R008	Mevalonate kinase	Mvk	0.467114	1.65731	0.105123	0.37511
Q9WVT6	Carbonic anhydrase 14	Ca14	0.33805	1.65755	0.105073	0.37511
Q5DTL9	Sodium-driven chloride bicarbonate exchanger	Slc4a10	-0.155189	-1.65473	0.105648	0.376608
P50516	V-type proton ATPase catalytic subunit A	Atp6v1a	-0.095475	-1.65269	0.106065	0.377148
Q7TPV4	Myb-binding protein 1A	Mybbp1a	-0.289964	-1.65244	0.106116	0.377148
Q8VCN5	Cystathionine gamma-lyase	Cth	-0.207481	-1.65296	0.10601	0.377148
P22005	Proenkephalin-A;Synenkephalin;Met-enkephalin;PENK(114-133);PENK(143-184);Met-enkephalin-Arg-Ser-Leu;Leu-enkephalin;PENK(238-259);Met-enkephalin-Arg-Phe	Penk	-0.44621	-1.65192	0.106223	0.377156
P19783	Cytochrome c oxidase subunit 4 isoform 1, mitochondrial	Cox4i1	-0.132586	-1.65034	0.106546	0.377928
Q9QZD9	Eukaryotic translation initiation factor 3 subunit I	Eif3i	0.207843	1.64931	0.106759	0.378309
P11983	T-complex protein 1 subunit alpha	Tcp1	-0.119519	-1.64712	0.10721	0.378945
Q80TS7	Dendrin	Ddn	-0.22068	-1.6471	0.107214	0.378945
Q9QYI3	DnaJ homolog subfamily C member 7	Dnajc7	0.233159	1.64689	0.107257	0.378945
Q02357	Ankyrin-1	Ank1	-0.38793	-1.64573	0.107497	0.37942
Q8BWU5	Probable tRNA N6-adenosine threonylcarbamoyltransferase	Osgep	-0.594063	-1.64378	0.107902	0.380473
P63024	Vesicle-associated membrane protein 3	Vamp3	0.514063	1.64304	0.108055	0.380637
A2AP18	1-phosphatidylinositol 4,5-bisphosphate phosphodiesterase eta-2	Plch2	0.381325	1.64173	0.108327	0.380848
Q9D880	Mitochondrial import inner membrane translocase subunit TIM50	Timm50	0.232584	1.64224	0.108222	0.380848
Q9R1V6	Disintegrin and metalloproteinase domain-containing protein 22	Adam22	-0.131751	-1.64056	0.108572	0.381336
P51410	60S ribosomal protein L9	Rpl9	0.208318	1.63816	0.109073	0.382719
Q9D6K8	FUN14 domain-containing protein 2	Fundc2	-0.289192	-1.63699	0.109318	0.383202
Q8C1A5	Thimet oligopeptidase	Thop1	-0.114851	-1.63613	0.109499	0.383462
P21661	Neuroendocrine convertase 2	Pcsk2	-0.25407	-1.63433	0.109879	0.383618
Q06185	ATP synthase subunit e, mitochondrial	Atp5i	-0.138848	-1.63534	0.109666	0.383618
Q8QZR5	Alanine aminotransferase 1	Gpt	-0.237409	-1.63482	0.109776	0.383618
Q9D1G1	Ras-related protein Rab-1B	Rab1b	-0.0925742	-1.63388	0.109973	0.383618
Q8R3D1	TBC1 domain family member 13	Tbc1d13	-0.312814	-1.63336	0.110083	0.383631
O35927	Catenin delta-2	Ctnnd2	-0.132874	-1.62952	0.110896	0.385231
Q60634	Flotillin-2	Flot2	-0.161299	-1.63005	0.110782	0.385231
Q8JZP2	Synapsin-3	Syn3	-0.41304	-1.62915	0.110973	0.385231
Q9D1A2	Cytosolic non-specific dipeptidase	Cndp2	0.128196	1.63018	0.110755	0.385231
Q9JLI8	Squamous cell carcinoma antigen recognized by T-cells 3	Sart3	0.36907	1.62764	0.111296	0.385977
O08576	RUN domain-containing protein 3A	Rundc3a	0.413456	1.62311	0.112263	0.388955
Q7TNM2	Tripartite motif-containing protein 46	Trim46	0.218894	1.62087	0.112744	0.390244
O70194	Eukaryotic translation initiation factor 3 subunit D	Eif3d	0.21765	1.61743	0.113488	0.391785
Q62351	Transferrin receptor protein 1	Tfrc	0.231027	1.61731	0.113513	0.391785
Q8R555	Cartilage acidic protein 1	Crtac1	0.409747	1.61729	0.113518	0.391785
Q64253	Lymphocyte antigen 6E	Ly6e	0.235045	1.61617	0.11376	0.392243
P62960;Q9JKB3;Q9Z2C8	Nuclease-sensitive element-binding protein 1	Ybx1	0.338239	1.614	0.114231	0.393139
Q8BFT9	Synaptic vesicle 2-related protein	Svop	-0.293237	-1.61396	0.11424	0.393139
Q8BYK4	Retinol dehydrogenase 12	Rdh12	-0.46908	-1.61254	0.114548	0.393822
P68254	14-3-3 protein theta	Ywhaq	-0.103312	-1.61138	0.114802	0.394211
Q61831	Mitogen-activated protein kinase 10	Mapk10	-0.26462	-1.61101	0.114882	0.394211
Q99J45	Nuclear receptor-binding protein	Nrbp1	-0.378401	-1.60956	0.115199	0.394353
Q9DC33	High mobility group protein 20A	Hmg20a	-0.43256	-1.60892	0.115341	0.394353
Q9ESW4	Acylglycerol kinase, mitochondrial	Agk	-0.109259	-1.60984	0.11514	0.394353
Q9JME5	AP-3 complex subunit beta-2	Ap3b2	-0.0843837	-1.60881	0.115364	0.394353
Q9EPU0	Regulator of nonsense transcripts 1	Upf1	-0.172969	-1.60825	0.115488	0.394399
Q8R404	Protein QIL1	Qil1	-0.148758	-1.60747	0.115659	0.394609
Q8BXK8	Arf-GAP with GTPase, ANK repeat and PH domain-containing protein 1	Agap1	0.262362	1.60685	0.115794	0.394693
O35381;Q64G17	Acidic leucine-rich nuclear phosphoprotein 32 family member A	Anp32a	-0.172533	-1.60416	0.116387	0.395207
P99028	Cytochrome b-c1 complex subunit 6, mitochondrial	Uqcrh	-0.284754	-1.60419	0.11638	0.395207
Q3TFQ1	SPRY domain-containing protein 7	Spryd7	-0.279664	-1.6042	0.11638	0.395207
Q9JLJ2	4-trimethylaminobutyraldehyde dehydrogenase	Aldh9a1	-0.128234	-1.60445	0.116323	0.395207
Q9CZN8	Glutamyl-tRNA(Gln) amidotransferase subunit A, mitochondrial	Qrsl1	-0.313368	-1.60268	0.116716	0.395949
Q6PIC6	Sodium/potassium-transporting ATPase subunit alpha-3	Atp1a3	-0.0984012	-1.59823	0.117704	0.398923
P16546	Spectrin alpha chain, non-erythrocytic 1	Sptan1	-0.101632	-1.59567	0.118275	0.399759
Q80TS3	Latrophilin-3	Lphn3	-0.42221	-1.59562	0.118286	0.399759
Q99L47	Hsc70-interacting protein	St13	-0.150881	-1.59572	0.118264	0.399759
P00920	Carbonic anhydrase 2	Ca2	0.167672	1.59503	0.118419	0.399833
Q8C4Q6	Axin interactor, dorsalization-associated protein	Aida	-0.326374	-1.59351	0.11876	0.400606
P15864;Q07133	Histone H1.2	Hist1h1c	0.345868	1.59297	0.118881	0.400634
O88322	Nidogen-2	Nid2	0.355734	1.59187	0.119127	0.401086
Q99020	Heterogeneous nuclear ribonucleoprotein A/B	Hnrnpab	-0.12801	-1.5908	0.119368	0.40152
Q3UHK1	Proton myo-inositol cotransporter	Slc2a13	0.224016	1.59011	0.119525	0.401672
P70297;O88811	Signal transducing adapter molecule 1	Stam	0.100435	1.58732	0.120155	0.403411
O54984	ATPase Asna1	Asna1	-0.162604	-1.5851	0.120659	0.404723
Q61035;Q99KK9	Histidine--tRNA ligase, cytoplasmic	Hars	-0.250142	-1.58399	0.120912	0.405019
Q8JZV7	Putative N-acetylglucosamine-6-phosphate deacetylase	Amdhd2	0.387622	1.58372	0.120974	0.405019
P70245	3-beta-hydroxysteroid-Delta(8),Delta(7)-isomerase	Ebp	0.300712	1.58032	0.121751	0.407173
P97447	Four and a half LIM domains protein 1	Fhl1	0.131722	1.57991	0.121845	0.407173
Q9CQ69	Cytochrome b-c1 complex subunit 8	Uqcrq	-0.248982	-1.57845	0.12218	0.407914
P18052	Receptor-type tyrosine-protein phosphatase alpha	Ptpra	0.185877	1.57717	0.122474	0.408514
F6W8I0	YjeF N-terminal domain-containing protein 3	Yjefn3	-0.288488	-1.57534	0.122896	0.409538
P35980	60S ribosomal protein L18	Rpl18	-0.227648	-1.57076	0.123957	0.410136
P51859	Hepatoma-derived growth factor	Hdgf	0.228315	1.56977	0.124187	0.410136
P62077	Mitochondrial import inner membrane translocase subunit Tim8 B	Timm8b	-0.258388	-1.57018	0.124091	0.410136
Q3UPL0	Protein transport protein Sec31A	Sec31a	0.144469	1.5718	0.123715	0.410136
Q68FD9	UPF0606 protein KIAA1549	Kiaa1549	-0.261374	-1.57048	0.124022	0.410136
Q6PGF7	Exocyst complex component 8	Exoc8	-0.146592	-1.56982	0.124176	0.410136
Q80XI3	Eukaryotic translation initiation factor 4 gamma 3	Eif4g3	-0.215436	-1.57184	0.123706	0.410136
Q8VIM9	Immunity-related GTPase family Q protein	Irgq	-0.355687	-1.57076	0.123957	0.410136
Q9CPW0	Contactin-associated protein-like 2	Cntnap2	-0.126163	-1.56962	0.124221	0.410136
Q9JKF1	Ras GTPase-activating-like protein IQGAP1	Iqgap1	0.215065	1.57049	0.124021	0.410136
P42932	T-complex protein 1 subunit theta	Cct8	-0.0951595	-1.56554	0.125176	0.411083
Q63810;Q63811	Calcineurin subunit B type 1	Ppp3r1	-0.103614	-1.56727	0.12477	0.411083
Q69ZU6	Thrombospondin type-1 domain-containing protein 7A	Thsd7a	0.291872	1.56614	0.125034	0.411083
Q8BMI3;Q6P5E6	ADP-ribosylation factor-binding protein GGA3	Gga3	0.245393	1.56579	0.125116	0.411083
Q99M51	Cytoplasmic protein NCK1	Nck1	-0.255419	-1.56513	0.125272	0.411083
Q9EQF6	Dihydropyrimidinase-related protein 5	Dpysl5	-0.141072	-1.56496	0.125312	0.411083
Q9QZH3	Peptidyl-prolyl cis-trans isomerase E	Ppie	0.227272	1.56649	0.124954	0.411083
O35621;Q9Z2M7	Phosphomannomutase 1	Pmm1	-0.20024	-1.56277	0.125824	0.412386
A2AQ07	Tubulin beta-1 chain	Tubb1	0.616047	1.55809	0.126931	0.412434
O55100	Synaptogyrin-1	Syngr1	-0.301179	-1.55775	0.127011	0.412434
P24369	Peptidyl-prolyl cis-trans isomerase B	Ppib	0.157975	1.55962	0.126569	0.412434
P26231	Catenin alpha-1	Ctnna1	0.344455	1.55686	0.127222	0.412434
P62814	V-type proton ATPase subunit B, brain isoform	Atp6v1b2	-0.0806138	-1.55711	0.127164	0.412434
Q60710	Deoxynucleoside triphosphate triphosphohydrolase SAMHD1	Samhd1	0.688988	1.5587	0.126785	0.412434
Q64520	Guanylate kinase	Guk1	0.184852	1.56017	0.126439	0.412434
Q80TB8	Synaptic vesicle membrane protein VAT-1 homolog-like	Vat1l	-0.334417	-1.55781	0.126997	0.412434
Q8C7M3	E3 ubiquitin-protein ligase TRIM9	Trim9	-0.187006	-1.56219	0.125962	0.412434
Q9DBS2	Tumor protein p63-regulated gene 1-like protein	Tprg1l	-0.266364	-1.5572	0.127143	0.412434
Q9JMH6;Q9JLT4	Thioredoxin reductase 1, cytoplasmic	Txnrd1	0.1968	1.55765	0.127034	0.412434
Q9R0D8	WD repeat-containing protein 54	Wdr54	-0.24542	-1.55746	0.12708	0.412434
P43024	Cytochrome c oxidase subunit 6A1, mitochondrial	Cox6a1	0.21692	1.55228	0.128312	0.414024
P70302	Stromal interaction molecule 1	Stim1	-0.21231	-1.5519	0.128405	0.414024
Q3UNH4	G protein-regulated inducer of neurite outgrowth 1	Gprin1	-0.135263	-1.5531	0.128117	0.414024
Q61191	Host cell factor 1;HCF N-terminal chain 1;HCF N-terminal chain 2;HCF N-terminal chain 3;HCF N-terminal chain 4;HCF N-terminal chain 5;HCF N-terminal chain 6;HCF C-terminal chain 1;HCF C-terminal chain 2;HCF C-terminal chain 3;HCF C-terminal chain 4;HCF C-terminal chain 5;HCF C-terminal chain 6	Hcfc1	0.299207	1.55189	0.128406	0.414024
Q9CQD1	Ras-related protein Rab-5A	Rab5a	-0.140764	-1.55336	0.128056	0.414024
Q9DBC7	cAMP-dependent protein kinase type I-alpha regulatory subunit;cAMP-dependent protein kinase type I-alpha regulatory subunit, N-terminally processed	Prkar1a	0.154131	1.55321	0.128091	0.414024
P27671	Ras-specific guanine nucleotide-releasing factor 1	Rasgrf1	-0.182153	-1.55109	0.128597	0.414265
Q921Q7	Ras and Rab interactor 1	Rin1	-0.375942	-1.55002	0.128855	0.414722
Q69Z98	Serine/threonine-protein kinase BRSK2	Brsk2	-0.284078	-1.54928	0.129032	0.414921
P61202	COP9 signalosome complex subunit 2	Cops2	-0.129475	-1.54632	0.129745	0.416091
Q3UJU9	Regulator of microtubule dynamics protein 3	Rmdn3	0.193204	1.54672	0.129648	0.416091
Q8K4Z5	Splicing factor 3A subunit 1	Sf3a1	0.253061	1.54672	0.129649	0.416091
Q04690	Neurofibromin	Nf1	-0.443024	-1.54545	0.129954	0.416388
Q9D1K7	UPF0687 protein C20orf27 homolog		-0.296721	-1.5442	0.130257	0.416985
P97855	Ras GTPase-activating protein-binding protein 1	G3bp1	0.205807	1.54334	0.130465	0.41723
Q80X80	C2 domain-containing protein 2-like	C2cd2l	0.175735	1.5428	0.130594	0.41723
Q8CHX7	Raftlin-2	Rftn2	0.328769	1.5421	0.130764	0.41723
Q9CR00	26S proteasome non-ATPase regulatory subunit 9	Psmd9	0.23942	1.54196	0.1308	0.41723
P19536	Cytochrome c oxidase subunit 5B, mitochondrial	Cox5b	-0.12928	-1.54118	0.130988	0.417399
Q8C6E0	Cilia- and flagella-associated protein 36	Cfap36	-0.335041	-1.54078	0.131086	0.417399
Q61301	Catenin alpha-2	Ctnna2	-0.114705	-1.53909	0.131498	0.41775
Q8VE22	28S ribosomal protein S23, mitochondrial	Mrps23	0.301203	1.53889	0.131546	0.41775
Q91YH5	Atlastin-3	Atl3	-0.219122	-1.53911	0.131492	0.41775
Q9Z2U0;Q9CWH6	Proteasome subunit alpha type-7	Psma7	0.108633	1.5375	0.131886	0.418459
P26443	Glutamate dehydrogenase 1, mitochondrial	Glud1	0.120544	1.53211	0.133208	0.420208
P62897;CON__P62894;P00015	Cytochrome c, somatic	Cycs	0.186788	1.53232	0.133156	0.420208
Q5SSM3	Rho GTPase-activating protein 44	Arhgap44	-0.249224	-1.53293	0.133007	0.420208
Q8BRT1	CLIP-associating protein 2	Clasp2	-0.0945292	-1.53464	0.132586	0.420208
Q922Q8	Leucine-rich repeat-containing protein 59	Lrrc59	0.161324	1.5319	0.13326	0.420208
Q99KQ4	Nicotinamide phosphoribosyltransferase	Nampt	0.213263	1.53391	0.132765	0.420208
Q9Z2L6	Multiple inositol polyphosphate phosphatase 1	Minpp1	-0.342	-1.53233	0.133154	0.420208
Q9DCM0	Persulfide dioxygenase ETHE1, mitochondrial	Ethe1	-0.302823	-1.52693	0.134489	0.423711
P26049	Gamma-aminobutyric acid receptor subunit alpha-3	Gabra3	0.518605	1.52505	0.134957	0.423837
P51174	Long-chain specific acyl-CoA dehydrogenase, mitochondrial	Acadl	0.14739	1.52535	0.134881	0.423837
Q6ZQ82	Rho GTPase-activating protein 26	Arhgap26	0.376608	1.52486	0.135003	0.423837
Q8VCY8	Lipid phosphate phosphatase-related protein type 2	Lppr2	-0.228573	-1.52625	0.134658	0.423837
Q3TCJ1	BRISC complex subunit Abro1	Fam175b	-0.229228	-1.52356	0.135328	0.424455
Q9ES00	Ubiquitin conjugation factor E4 B	Ube4b	-0.228661	-1.52312	0.135437	0.424455
Q8R550	SH3 domain-containing kinase-binding protein 1	Sh3kbp1	0.228298	1.52078	0.136022	0.425174
Q99JX4	Eukaryotic translation initiation factor 3 subunit M	Eif3m	-0.38637	-1.52113	0.135935	0.425174
Q9WUR9	Adenylate kinase 4, mitochondrial	Ak4	-0.138307	-1.52156	0.135828	0.425174
Q9EPL8	Importin-7	Ipo7	-0.161653	-1.52024	0.136159	0.425228
Q8BTY8	Sec1 family domain-containing protein 2	Scfd2	0.315818	1.51731	0.136894	0.426985
Q91WQ3	Tyrosine--tRNA ligase, cytoplasmic;Tyrosine--tRNA ligase, cytoplasmic, N-terminally processed	Yars	-0.148169	-1.51705	0.13696	0.426985
O88545	COP9 signalosome complex subunit 6	Cops6	-0.259737	-1.51602	0.13722	0.427425
P33175	Kinesin heavy chain isoform 5A	Kif5a	-0.197634	-1.51412	0.137699	0.428544
P70698	CTP synthase 1	Ctps1	0.299085	1.51198	0.13824	0.429481
Q80VD1	Protein FAM98B	Fam98b	0.111781	1.51226	0.138172	0.429481
Q8BTG7	Protein NDRG4	Ndrg4	0.16914	1.51087	0.138524	0.429989
P58021	Transmembrane 9 superfamily member 2	Tm9sf2	0.220637	1.50995	0.138758	0.429996
Q80TM9	Nischarin	Nisch	-0.17728	-1.50991	0.138767	0.429996
P12960	Contactin-1	Cntn1	-0.0928747	-1.50799	0.139256	0.431138
P22723	Gamma-aminobutyric acid receptor subunit gamma-2	Gabrg2	-0.205497	-1.5055	0.139895	0.432369
Q9Z204	Heterogeneous nuclear ribonucleoproteins C1/C2	Hnrnpc	-0.134214	-1.50552	0.139888	0.432369
P05202	Aspartate aminotransferase, mitochondrial	Got2	-0.131907	-1.50236	0.140701	0.432696
P09602	Non-histone chromosomal protein HMG-17	Hmgn2	0.47481	1.50234	0.140705	0.432696
P63137	Gamma-aminobutyric acid receptor subunit beta-2	Gabrb2	-0.159739	-1.50258	0.140643	0.432696
Q4U4S6	Xin actin-binding repeat-containing protein 2	Xirp2	0.229714	1.50226	0.140726	0.432696
Q80UG5	Septin-9	2023-09-09	-0.137571	-1.50335	0.140444	0.432696
Q91ZX7	Prolow-density lipoprotein receptor-related protein 1;Low-density lipoprotein receptor-related protein 1 85 kDa subunit;Low-density lipoprotein receptor-related protein 1 515 kDa subunit;Low-density lipoprotein receptor-related protein 1 intracellular domain	Lrp1	0.0873058	1.50238	0.140694	0.432696
P29699	Alpha-2-HS-glycoprotein	Ahsg	0.471095	1.49985	0.141348	0.433863
Q8R5H6	Wiskott-Aldrich syndrome protein family member 1	Wasf1	-0.125298	-1.50011	0.141281	0.433863
O08992	Syntenin-1	Sdcbp	0.248291	1.49665	0.142176	0.434171
P62855	40S ribosomal protein S26	Rps26	0.160458	1.49744	0.141971	0.434171
Q9CXI0	2-methoxy-6-polyprenyl-1,4-benzoquinol methylase, mitochondrial	Coq5	0.178329	1.49861	0.141666	0.434171
Q9CXW3	Calcyclin-binding protein	Cacybp	-0.155864	-1.49788	0.141857	0.434171
Q9DCJ1	Target of rapamycin complex subunit LST8	Mlst8	-0.208528	-1.49797	0.141834	0.434171
Q9QXG4	Acetyl-coenzyme A synthetase, cytoplasmic	Acss2	0.230329	1.497	0.142086	0.434171
P26645	Myristoylated alanine-rich C-kinase substrate	Marcks	0.215726	1.49407	0.142846	0.434364
P56394	Cytochrome c oxidase copper chaperone	Cox17	-0.257696	-1.49547	0.142482	0.434364
Q5HZI9	Solute carrier family 25 member 51	Slc25a51	-0.308986	-1.49485	0.142643	0.434364
Q810A7	ATP-dependent RNA helicase DDX42	Ddx42	-0.322919	-1.4936	0.142968	0.434364
Q8CI61	BAG family molecular chaperone regulator 4	Bag4	-0.192827	-1.49399	0.142867	0.434364
Q91ZZ3	Beta-synuclein	Sncb	0.303565	1.4938	0.142917	0.434364
Q9WUB3	Glycogen phosphorylase, muscle form	Pygm	-0.16694	-1.49202	0.143381	0.435252
Q9CR95	Adaptin ear-binding coat-associated protein 1	Necap1	-0.172962	-1.49021	0.143854	0.436318
Q80XK6	Autophagy-related protein 2 homolog B	Atg2b	0.307488	1.48961	0.144012	0.436426
Q3UH68	LIM and calponin homology domains-containing protein 1	Limch1	-0.204797	-1.48773	0.144507	0.437554
D3YZU1	SH3 and multiple ankyrin repeat domains protein 1	Shank1	-0.110696	-1.48627	0.144889	0.438311
Q7TMF3	NADH dehydrogenase [ubiquinone] 1 alpha subcomplex subunit 12	Ndufa12	-0.14073	-1.48585	0.145001	0.438311
Q60749;Q9WU01	KH domain-containing, RNA-binding, signal transduction-associated protein 1	Khdrbs1	0.151689	1.48437	0.145391	0.438746
Q9WVL0	Maleylacetoacetate isomerase	Gstz1	-0.347574	-1.4847	0.145305	0.438746
Q9D8T7	SRA stem-loop-interacting RNA-binding protein, mitochondrial	Slirp	-0.37756	-1.48356	0.145604	0.43902
Q8K1J6	CCA tRNA nucleotidyltransferase 1, mitochondrial	Trnt1	-0.240382	-1.4829	0.14578	0.439181
P0DP60			-0.202281	-1.48129	0.146205	0.439676
Q6P3D0	U8 snoRNA-decapping enzyme	Nudt16	-0.297588	-1.48173	0.146088	0.439676
Q8K4G5	Actin-binding LIM protein 1	Ablim1	-0.21887	-1.48089	0.146313	0.439676
Q5ND34	WD repeat-containing protein 81	Wdr81	-0.544271	-1.47823	0.14702	0.441059
Q8CHI8	E1A-binding protein p400	Ep400	0.253401	1.47836	0.146986	0.441059
P36536	GTP-binding protein SAR1a	Sar1a	-0.225594	-1.47699	0.14735	0.441679
P38647	Stress-70 protein, mitochondrial	Hspa9	-0.0950537	-1.47425	0.148084	0.442592
Q8BMF3	NADP-dependent malic enzyme, mitochondrial	Me3	0.453311	1.47481	0.147934	0.442592
Q8JZU2	Tricarboxylate transport protein, mitochondrial	Slc25a1	0.250078	1.47404	0.148139	0.442592
Q8VH51	RNA-binding protein 39	Rbm39	0.203635	1.47401	0.148149	0.442592
P34152	Focal adhesion kinase 1	Ptk2	-0.224659	-1.47306	0.148402	0.442978
P62267	40S ribosomal protein S23	Rps23	0.367133	1.47075	0.149023	0.443276
Q78J03	Methionine-R-sulfoxide reductase B2, mitochondrial	Msrb2	0.384326	1.47069	0.14904	0.443276
Q8K274	Ketosamine-3-kinase	Fn3krp	-0.220199	-1.47141	0.148846	0.443276
Q8R1B4	Eukaryotic translation initiation factor 3 subunit C	Eif3c	0.149406	1.47039	0.149121	0.443276
Q9D1E8	1-acyl-sn-glycerol-3-phosphate acyltransferase epsilon	Agpat5	0.239133	1.47187	0.148723	0.443276
Q8BGU5	Cyclin-Y	Ccny	-0.17544	-1.46884	0.149541	0.443528
Q8VD37	SH3-containing GRB2-like protein 3-interacting protein 1	Sgip1	-0.0896052	-1.4694	0.149387	0.443528
Q99J77		Nans	0.33699	1.4687	0.149578	0.443528
P32020	Non-specific lipid-transfer protein	Scp2	0.203969	1.46686	0.150075	0.443899
Q6PDQ2	Chromodomain-helicase-DNA-binding protein 4	Chd4	0.230351	1.46759	0.149878	0.443899
Q9QWR8	Alpha-N-acetylgalactosaminidase	Naga	0.165363	1.46705	0.150024	0.443899
Q8CIV8	Tubulin-specific chaperone E	Tbce	-0.236213	-1.46621	0.150252	0.444055
O08600	Endonuclease G, mitochondrial	Endog	-0.314383	-1.46567	0.150397	0.444117
P57722	Poly(rC)-binding protein 3	Pcbp3	0.289694	1.46288	0.151157	0.445259
Q3UUG6	TBC1 domain family member 24	Tbc1d24	-0.310762	-1.4629	0.151152	0.445259
Q99LT0	Protein dpy-30 homolog	Dpy30	0.495311	1.46368	0.150938	0.445259
O35598	Disintegrin and metalloproteinase domain-containing protein 10	Adam10	0.293232	1.4608	0.151724	0.445982
Q61735	Leukocyte surface antigen CD47	Cd47	-0.164303	-1.46121	0.151613	0.445982
Q9JLV6	Bifunctional polynucleotide phosphatase/kinase;Polynucleotide 3-phosphatase;Polynucleotide 5-hydroxyl-kinase	Pnkp	0.29166	1.46061	0.151776	0.445982
Q8K4X7	1-acyl-sn-glycerol-3-phosphate acyltransferase delta	Agpat4	-0.316684	-1.45916	0.152172	0.446778
Q61316	Heat shock 70 kDa protein 4	Hspa4	-0.0814037	-1.45864	0.152315	0.446831
A6H6A9	Rab GTPase-activating protein 1-like	Rabgap1l	-1.24613	-1.45718	0.152716	0.44764
P35922	Fragile X mental retardation protein 1 homolog	Fmr1	-0.203319	-1.45481	0.153369	0.449087
Q8BH55	Threonine synthase-like 1	Thnsl1	-0.262707	-1.45447	0.15346	0.449087
P0DN34			-0.203801	-1.45374	0.153663	0.449312
P62311	U6 snRNA-associated Sm-like protein LSm3	Lsm3	0.271348	1.452	0.154142	0.450348
Q7TN29	Stromal membrane-associated protein 2	Smap2	-0.185416	-1.45005	0.154684	0.450652
Q925N0	Sideroflexin-5	Sfxn5	0.128315	1.45037	0.154595	0.450652
Q9CQT7	Desumoylating isopeptidase 1	Desi1	0.326739	1.44981	0.15475	0.450652
Q9EQP2	EH domain-containing protein 4	Ehd4	0.459222	1.45036	0.154598	0.450652
Q00493	Carboxypeptidase E	Cpe	0.141675	1.44705	0.155518	0.451785
Q80X50	Ubiquitin-associated protein 2-like	Ubap2l	-0.106676	-1.44756	0.155374	0.451785
Q99LB2	Dehydrogenase/reductase SDR family member 4	Dhrs4	-0.225466	-1.44745	0.155407	0.451785
Q8C3Q5	Protein shisa-7	Shisa7	-0.267191	-1.44461	0.156199	0.453395
P14685	26S proteasome non-ATPase regulatory subunit 3	Psmd3	0.10717	1.44293	0.15667	0.453508
Q8CGP5;Q8R1M2;Q8CGP7;Q8BFU2;Q8CGP6;C0HKE9;C0HKE8;C0HKE7;C0HKE6;C0HKE5;C0HKE4;C0HKE3;C0HKE2;C0HKE1	Histone H2A type 1-F;Histone H2A.J;Histone H2A type 1-K;Histone H2A type 3;Histone H2A type 1-H	Hist1h2af;H2afj;Hist1h2ak;Hist3h2a;Hist1h2ah	-1.19924	-1.44344	0.156527	0.453508
Q8CIE6	Coatomer subunit alpha;Xenin;Proxenin	Copa	0.127844	1.44266	0.156745	0.453508
Q9CPW2	Adrenodoxin-like protein, mitochondrial	Fdx1l	-0.502964	-1.44301	0.156645	0.453508
Q99MK8	Beta-adrenergic receptor kinase 1	Adrbk1	0.185172	1.44146	0.157081	0.454112
Q9QZ08	N-acetyl-D-glucosamine kinase	Nagk	-0.276775	-1.44003	0.157485	0.454913
Q8BMK4	Cytoskeleton-associated protein 4	Ckap4	-0.189443	-1.43802	0.158051	0.45618
Q8R361	Rab11 family-interacting protein 5	Rab11fip5	-0.192805	-1.4366	0.158451	0.456601
Q9CR60	Vesicle transport protein GOT1B	Golt1b	-0.169937	-1.43699	0.158341	0.456601
Q06138	Calcium-binding protein 39	Cab39	-0.163279	-1.43463	0.159008	0.457835
P58252	Elongation factor 2	Eef2	0.0784248	1.43397	0.159197	0.458012
Q8BK64;Q8N9S3	Activator of 90 kDa heat shock protein ATPase homolog 1	Ahsa1	-0.127137	-1.43349	0.159331	0.458029
Q6GQT9	Nodal modulator 1	Nomo1	0.221602	1.43285	0.159514	0.458187
P61021	Ras-related protein Rab-5B	Rab5b	-0.201072	-1.43234	0.15966	0.458239
P45377	Aldose reductase-related protein 2	Akr1b8	0.392645	1.43061	0.160153	0.459223
Q9QUR8	Semaphorin-7A	Sema7a	-0.210218	-1.42978	0.160388	0.459223
Q9QZH6	Evolutionarily conserved signaling intermediate in Toll pathway, mitochondrial	Ecsit	-0.288973	-1.43	0.160325	0.459223
P04370	Myelin basic protein	Mbp	0.204497	1.42576	0.16154	0.461269
P60603	Reactive oxygen species modulator 1	Romo1	-0.217735	-1.42352	0.162182	0.461269
P61028	Ras-related protein Rab-8B	Rab8b	-0.215816	-1.42371	0.162129	0.461269
P62908	40S ribosomal protein S3	Rps3	0.0831666	1.4248	0.161815	0.461269
Q61147;CON__ENSEMBL:ENSBTAP00000031900	Ceruloplasmin	Cp	0.41184	1.42235	0.16252	0.461269
Q64674	Spermidine synthase	Srm	-0.186335	-1.42665	0.161284	0.461269
Q8BGQ7	Alanine--tRNA ligase, cytoplasmic	Aars	0.093868	1.42306	0.162315	0.461269
Q8BSS9	Liprin-alpha-2	Ppfia2	-0.189697	-1.42538	0.161648	0.461269
Q8K2K6	Arf-GAP domain and FG repeat-containing protein 1	Agfg1	-0.137553	-1.42304	0.162322	0.461269
Q9CYR6	Phosphoacetylglucosamine mutase	Pgm3	-0.2699	-1.42276	0.162402	0.461269
Q9CZN4	Protein shisa-9	Shisa9	-0.199061	-1.42554	0.161603	0.461269
Q61387	Cytochrome c oxidase subunit 7A-related protein, mitochondrial	Cox7a2l	-1.04016	-1.42124	0.162841	0.461729
Q80YD1	ATP-dependent RNA helicase SUPV3L1, mitochondrial	Supv3l1	-0.295981	-1.42045	0.16307	0.461729
Q8K097	Protein lifeguard 2	Faim2	0.234472	1.42084	0.162957	0.461729
A2CG63	AT-rich interactive domain-containing protein 4B	Arid4b	-0.174229	-1.41978	0.163263	0.461912
Q91YQ3	Cold shock domain-containing protein C2	Csdc2	0.380773	1.41661	0.164182	0.463779
Q9WUD1	STIP1 homology and U box-containing protein 1	Stub1	-0.397379	-1.41678	0.164132	0.463779
Q8C1B7	Septin-11	2023-09-11	-0.117398	-1.41566	0.16446	0.464197
O55135	Eukaryotic translation initiation factor 6	Eif6	0.198317	1.41467	0.164748	0.464278
Q9ERS2	NADH dehydrogenase [ubiquinone] 1 alpha subcomplex subunit 13	Ndufa13	-0.204697	-1.41509	0.164625	0.464278
Q7TSC1	Protein PRRC2A	Prrc2a	0.221073	1.41306	0.165217	0.465232
Q9WUA2	Phenylalanine--tRNA ligase beta subunit	Farsb	-0.112907	-1.41242	0.165405	0.465395
P28271	Cytoplasmic aconitate hydratase	Aco1	0.119406	1.40947	0.166269	0.466728
Q8CC35	Synaptopodin	Synpo	-0.165526	-1.4098	0.16617	0.466728
Q9R013	Cathepsin F	Ctsf	0.183978	1.40977	0.166179	0.466728
P51175	Protoporphyrinogen oxidase	Ppox	0.206159	1.40499	0.167586	0.467127
P62717	60S ribosomal protein L18a	Rpl18a	0.303041	1.40552	0.167432	0.467127
Q64669	NAD(P)H dehydrogenase [quinone] 1	Nqo1	-0.25207	-1.40513	0.167545	0.467127
Q8BHZ0	Protein FAM49A	Fam49a	-0.108889	-1.40684	0.167041	0.467127
Q8BIZ1	Ankyrin repeat and sterile alpha motif domain-containing protein 1B	Anks1b	-0.139588	-1.40797	0.166709	0.467127
Q8K3A0	Iron-sulfur cluster co-chaperone protein HscB, mitochondrial	Hscb	-0.191231	-1.40585	0.167334	0.467127
Q91ZJ5	UTP--glucose-1-phosphate uridylyltransferase	Ugp2	0.113015	1.40502	0.167579	0.467127
Q9DBE8	Alpha-1,3/1,6-mannosyltransferase ALG2	Alg2	-0.0978409	-1.40672	0.167078	0.467127
Q9R257	Heme-binding protein 1	Hebp1	-0.261111	-1.40761	0.166815	0.467127
Q810U4	Neuronal cell adhesion molecule	Nrcam	-0.0738391	-1.40425	0.167806	0.467375
Q8CBE3	WD repeat-containing protein 37	Wdr37	-0.122716	-1.40316	0.16813	0.467914
O35350	Calpain-1 catalytic subunit	Capn1	0.188093	1.40005	0.169053	0.468521
O55013	Trafficking protein particle complex subunit 3	Trappc3	0.270057	1.39995	0.169081	0.468521
P09671	Superoxide dismutase [Mn], mitochondrial	Sod2	-0.162207	-1.40106	0.168752	0.468521
P97351	40S ribosomal protein S3a	Rps3a	-0.153762	-1.39889	0.169396	0.468521
Q00558	Factor VIII intron 22 protein	F8a1	-0.289631	-1.39903	0.169355	0.468521
Q5SV85	Synergin gamma	Synrg	-0.169371	-1.39929	0.169276	0.468521
Q6Y685	Transforming acidic coiled-coil-containing protein 1	Tacc1	-0.203887	-1.39846	0.169526	0.468521
Q8BG51	Mitochondrial Rho GTPase 1	Rhot1	-0.131378	-1.3993	0.169275	0.468521
Q9WVK4	EH domain-containing protein 1	Ehd1	-0.12189	-1.40074	0.168847	0.468521
O35127	Protein C10	Grcc10	-0.241323	-1.39518	0.170506	0.468694
P46660	Alpha-internexin	Ina	0.118392	1.39703	0.169951	0.468694
Q64337	Sequestosome-1	Sqstm1	0.286994	1.39569	0.170352	0.468694
Q8BFZ9	Erlin-2	Erlin2	0.240842	1.3959	0.17029	0.468694
Q8R0S2	IQ motif and SEC7 domain-containing protein 1	Iqsec1	-0.1451	-1.39746	0.169823	0.468694
Q9CQE1	Protein NipSnap homolog 3B	Nipsnap3b	-0.422402	-1.3966	0.17008	0.468694
Q9JIX8	Apoptotic chromatin condensation inducer in the nucleus	Acin1	0.31629	1.39528	0.170475	0.468694
Q8BRV5	Uncharacterized protein KIAA1671	Kiaa1671	-0.236478	-1.39402	0.170851	0.469284
Q99N96	39S ribosomal protein L1, mitochondrial	Mrpl1	-0.288145	-1.39333	0.171058	0.469395
Q9JJI8	60S ribosomal protein L38	Rpl38	-0.148903	-1.39302	0.171154	0.469395
Q3UHD6	Sorting nexin-27	Snx27	0.220094	1.39244	0.171327	0.469477
Q812A2	SLIT-ROBO Rho GTPase-activating protein 3	Srgap3	-0.130265	-1.39161	0.171578	0.469477
Q99NF2	NMDA receptor synaptonuclear signaling and neuronal migration factor	Nsmf	-0.225387	-1.39187	0.171498	0.469477
P84099	60S ribosomal protein L19	Rpl19	0.157815	1.39022	0.171994	0.469817
Q9CQY2	RNMT-activating mini protein	Fam103a1	0.370011	1.38902	0.172358	0.469817
Q9ESN9	C-Jun-amino-terminal kinase-interacting protein 3	Mapk8ip3	-0.221454	-1.38915	0.172319	0.469817
Q9JM96	Cdc42 effector protein 4	Cdc42ep4	0.159207	1.38915	0.172318	0.469817
Q9R1C6	Diacylglycerol kinase epsilon	Dgke	0.244208	1.38947	0.17222	0.469817
P62737;P63268	Actin, aortic smooth muscle;Actin, gamma-enteric smooth muscle	Acta2;Actg2	-0.545345	-1.385	0.173573	0.472531
Q921M4	Golgin subfamily A member 2	Golga2	-0.243551	-1.38451	0.173722	0.472531
Q99KP6	Pre-mRNA-processing factor 19	Prpf19	0.112741	1.38442	0.17375	0.472531
P53702	Cytochrome c-type heme lyase	Hccs	-0.298716	-1.38365	0.173983	0.472807
E9Q5C9		Nolc1	-0.530372	-1.38143	0.17466	0.473366
P08556	GTPase NRas	Nras	-0.175191	-1.38124	0.174718	0.473366
Q5XJV6	Serine/threonine-protein kinase LMTK3	Lmtk3	-0.212511	-1.3813	0.174701	0.473366
Q61206	Platelet-activating factor acetylhydrolase IB subunit beta	Pafah1b2	-0.114724	-1.38126	0.174711	0.473366
Q63844	Mitogen-activated protein kinase 3	Mapk3	0.139133	1.38014	0.175053	0.473814
Q9CQN1	Heat shock protein 75 kDa, mitochondrial	Trap1	0.157311	1.37983	0.175148	0.473814
P27546	Microtubule-associated protein 4	Map4	0.10443	1.37767	0.17581	0.475245
Q8BR92	Paralemmin-2	Palm2	-0.235551	-1.3765	0.17617	0.475857
P62082	40S ribosomal protein S7	Rps7	0.140879	1.37554	0.176463	0.476009
P70408	Cadherin-10	Cdh10	-0.203276	-1.37545	0.176492	0.476009
Q8BLR2	Copine-4	Cpne4	-0.130764	-1.37398	0.176944	0.47687
P24270	Catalase	Cat	0.185608	1.37271	0.177335	0.477035
Q00612;P97324	Glucose-6-phosphate 1-dehydrogenase X	G6pdx	0.113867	1.37281	0.177306	0.477035
Q62422	Osteoclast-stimulating factor 1	Ostf1	0.348654	1.37249	0.177405	0.477035
Q9DBR7	Protein phosphatase 1 regulatory subunit 12A	Ppp1r12a	-0.243312	-1.37162	0.177672	0.477394
P60824	Cold-inducible RNA-binding protein	Cirbp	0.22371	1.36981	0.178233	0.478226
Q8BIG7	Catechol O-methyltransferase domain-containing protein 1	Comtd1	0.286079	1.36976	0.178249	0.478226
O35295	Transcriptional activator protein Pur-beta	Purb	-0.126641	-1.36827	0.17871	0.478387
Q8VE62	Polyadenylate-binding protein-interacting protein 1	Paip1	0.287583	1.36875	0.178561	0.478387
Q9JKS5	Intracellular hyaluronan-binding protein 4	Habp4	-0.209033	-1.36862	0.178602	0.478387
O08529	Calpain-2 catalytic subunit	Capn2	0.15061	1.36765	0.178902	0.478543
Q6PGL7	WASH complex subunit FAM21	Fam21	0.213874	1.36616	0.179368	0.479431
P48774	Glutathione S-transferase Mu 5	Gstm5	-0.117224	-1.36306	0.180335	0.481614
Q8K183	Pyridoxal kinase	Pdxk	-0.290725	-1.36268	0.180454	0.481614
Q9JL56	Glycerophosphodiester phosphodiesterase 1	Gde1	0.209857	1.36186	0.180708	0.481933
Q8C052	Microtubule-associated protein 1S;MAP1S heavy chain;MAP1S light chain	Map1s	-0.210765	-1.36047	0.181144	0.482737
O88544	COP9 signalosome complex subunit 4	Cops4	0.134483	1.35901	0.181604	0.483337
Q8K021	Secretory carrier-associated membrane protein 1	Scamp1	-0.0857496	-1.3589	0.181639	0.483337
P51150	Ras-related protein Rab-7a	Rab7a	0.0848723	1.35632	0.182451	0.483698
Q3UHC7	Disabled homolog 2-interacting protein	Dab2ip	-0.188076	-1.35714	0.182192	0.483698
Q6NTA4;Q80X95	Ras-related GTP-binding protein B;Ras-related GTP-binding protein A	Rragb;Rraga	0.32153	1.35654	0.182381	0.483698
Q6ZWR6	Nesprin-1	Syne1	0.225205	1.35749	0.182082	0.483698
Q9D1P4	Cysteine and histidine-rich domain-containing protein 1	Chordc1	-0.110648	-1.35689	0.182271	0.483698
Q921M7	Protein FAM49B	Fam49b	-0.0720917	-1.35514	0.182824	0.484239
Q922B1	O-acetyl-ADP-ribose deacetylase MACROD1	Macrod1	-0.280955	-1.35482	0.182926	0.484239
Q6PDG5;P97496	SWI/SNF complex subunit SMARCC2	Smarcc2	-0.262411	-1.35439	0.183062	0.48424
Q8R081	Heterogeneous nuclear ribonucleoprotein L	Hnrnpl	0.0848329	1.35354	0.18333	0.484327
Q9DBJ1	Phosphoglycerate mutase 1	Pgam1	-0.0859699	-1.35343	0.183365	0.484327
Q8R3Z5	Voltage-dependent L-type calcium channel subunit beta-1	Cacnb1	-0.146185	-1.35191	0.183846	0.484525
Q9JI46	Diphosphoinositol polyphosphate phosphohydrolase 1	Nudt3	-0.166276	-1.35241	0.183687	0.484525
Q9JLM8	Serine/threonine-protein kinase DCLK1	Dclk1	-0.0856415	-1.35226	0.183734	0.484525
P12849	cAMP-dependent protein kinase type I-beta regulatory subunit	Prkar1b	-0.184265	-1.3497	0.184548	0.485281
P62075	Mitochondrial import inner membrane translocase subunit Tim13	Timm13	0.288857	1.35034	0.184345	0.485281
Q62188	Dihydropyrimidinase-related protein 3	Dpysl3	-0.100652	-1.34978	0.184522	0.485281
Q7TPM6	Fibronectin type III and SPRY domain-containing protein 1	Fsd1	0.175622	1.3493	0.184675	0.485281
Q8VEH8	Endoplasmic reticulum lectin 1	Erlec1	0.312377	1.34775	0.185169	0.486222
Q68FM6	Protein phosphatase 1 regulatory subunit 29	Elfn2	-0.19751	-1.34401	0.186366	0.48829
Q80XA6	RalBP1-associated Eps domain-containing protein 2	Reps2	-0.175961	-1.34404	0.186356	0.48829
Q9D7V9	N-acylethanolamine-hydrolyzing acid amidase;N-acylethanolamine-hydrolyzing acid amidase subunit alpha;N-acylethanolamine-hydrolyzing acid amidase subunit beta	Naaa	0.290443	1.34462	0.186172	0.48829
P97863	Nuclear factor 1 B-type	Nfib	0.251447	1.34195	0.187027	0.489664
Q80W04	Transmembrane and coiled-coil domains protein 2	Tmcc2	-0.20266	-1.34122	0.187264	0.48973
Q8BL66	Early endosome antigen 1	Eea1	-0.175911	-1.34102	0.187326	0.48973
O70252	Heme oxygenase 2	Hmox2	-0.199217	-1.33963	0.187774	0.490542
P97393	Rho GTPase-activating protein 5	Arhgap5	0.226161	1.33766	0.18841	0.491845
Q62165	Dystroglycan;Alpha-dystroglycan;Beta-dystroglycan	Dag1	0.203472	1.33663	0.188744	0.492356
Q8BS39	Uncharacterized protein C15orf57 homolog	Ccdc32	0.236526	1.33562	0.189071	0.492852
P97807	Fumarate hydratase, mitochondrial	Fh	-0.0735588	-1.33443	0.189458	0.493501
Q3V0C5	Ubiquitin carboxyl-terminal hydrolase 48	Usp48	1.44035	1.33379	0.189667	0.493686
P84228	Histone H3.2	Hist1h3b	0.375796	1.33316	0.189871	0.493859
Q9CQM9	Glutaredoxin-3	Glrx3	-0.119058	-1.33239	0.19012	0.494147
P97412	Lysosomal-trafficking regulator	Lyst	-0.199905	-1.3319	0.190281	0.494207
Q8K4I3	Rho guanine nucleotide exchange factor 6	Arhgef6	0.46886	1.33119	0.190511	0.494445
Q99J85	Neuronal pentraxin receptor	Nptxr	0.109029	1.32949	0.191067	0.495528
P03888	NADH-ubiquinone oxidoreductase chain 1	Mtnd1	0.169141	1.32651	0.192042	0.497696
O08795	Glucosidase 2 subunit beta	Prkcsh	0.0846499	1.32597	0.19222	0.497797
P70288	Histone deacetylase 2	Hdac2	0.17287	1.32384	0.192922	0.499254
Q6PAM0	5-AMP-activated protein kinase subunit beta-2	Prkab2	-0.299697	-1.32199	0.193529	0.500464
Q8R2Y0	Monoacylglycerol lipase ABHD6	Abhd6	-0.230831	-1.32121	0.19379	0.500775
P56546	C-terminal-binding protein 2	Ctbp2	-0.213887	-1.31979	0.194259	0.501625
P97822	Acidic leucine-rich nuclear phosphoprotein 32 family member E	Anp32e	0.204722	1.31911	0.194482	0.50184
P48542	G protein-activated inward rectifier potassium channel 2	Kcnj6	0.265585	1.31683	0.19524	0.502347
Q3U5Q7	UMP-CMP kinase 2, mitochondrial	Cmpk2	0.411256	1.31692	0.195211	0.502347
Q9JIX0	Transcription and mRNA export factor ENY2	Eny2	-0.454112	-1.31732	0.195075	0.502347
Q9Z1D1	Eukaryotic translation initiation factor 3 subunit G	Eif3g	-0.237412	-1.31726	0.195097	0.502347
P14873	Microtubule-associated protein 1B;MAP1B heavy chain;MAP1 light chain LC1	Map1b	-0.08566	-1.31544	0.195702	0.502812
Q80U87	Ubiquitin carboxyl-terminal hydrolase 8	Usp8	0.243342	1.31548	0.195689	0.502812
Q8BUV3	Gephyrin;Molybdopterin adenylyltransferase;Molybdopterin molybdenumtransferase	Gphn	-0.079446	-1.31463	0.195972	0.503144
P02088;P02089;CON__Q3SX09;P02104	Hemoglobin subunit beta-1;Hemoglobin subunit beta-2	Hbb-b1;Hbb-b2	-0.331854	-1.31305	0.196499	0.503775
P97411	Islet cell autoantigen 1	Ica1	0.168094	1.31344	0.196369	0.503775
O35382	Exocyst complex component 4	Exoc4	-0.202916	-1.31036	0.197397	0.50391
O55057	Retinal rod rhodopsin-sensitive cGMP 3,5-cyclic phosphodiesterase subunit delta	Pde6d	0.308268	1.31201	0.196846	0.50391
P28352	DNA-(apurinic or apyrimidinic site) lyase;DNA-(apurinic or apyrimidinic site) lyase, mitochondrial	Apex1	-0.12753	-1.31146	0.19703	0.50391
P43406	Integrin alpha-V;Integrin alpha-V heavy chain;Integrin alpha-V light chain	Itgav	0.126176	1.3116	0.196984	0.50391
P70206	Plexin-A1	Plxna1	-0.143162	-1.31079	0.197253	0.50391
Q8R366	Immunoglobulin superfamily member 8	Igsf8	-0.132052	-1.31067	0.197295	0.50391
O55023	Inositol monophosphatase 1	Impa1	-0.116324	-1.30692	0.198552	0.504216
O70274;Q63739	Protein tyrosine phosphatase type IVA 2;Protein tyrosine phosphatase type IVA 1	Ptp4a2;Ptp4a1	-0.166266	-1.30903	0.197845	0.504216
P50396	Rab GDP dissociation inhibitor alpha	Gdi1	-0.0611588	-1.30629	0.198765	0.504216
P62317	Small nuclear ribonucleoprotein Sm D2	Snrpd2	-0.14848	-1.30664	0.198648	0.504216
Q05909	Receptor-type tyrosine-protein phosphatase gamma	Ptprg	0.206261	1.30768	0.198299	0.504216
Q11011	Puromycin-sensitive aminopeptidase	Npepps	-0.0653926	-1.30795	0.198208	0.504216
Q64152	Transcription factor BTF3	Btf3	0.250056	1.30623	0.198784	0.504216
Q9DB20	ATP synthase subunit O, mitochondrial	Atp5o	-0.1031	-1.30842	0.198049	0.504216
Q9Z0G0	PDZ domain-containing protein GIPC1	Gipc1	0.234304	1.30698	0.198535	0.504216
Q8BH58	TIP41-like protein	Tiprl	0.137196	1.30431	0.199432	0.505501
Q8CI71	Coiled-coil domain-containing protein 132	Ccdc132	0.341347	1.30372	0.199633	0.505653
Q8BGD8	Cytochrome c oxidase assembly factor 6 homolog	Coa6	-0.188204	-1.30228	0.20012	0.506526
O35683	NADH dehydrogenase [ubiquinone] 1 alpha subcomplex subunit 1	Ndufa1	-0.219797	-1.30182	0.200274	0.506558
Q9D1E6	Tubulin-folding cofactor B	Tbcb	0.160814	1.30044	0.200742	0.507383
Q922R1	UPF0183 protein C16orf70 homolog		-0.475952	-1.2997	0.200996	0.507667
A2A432	Cullin-4B	Cul4b	-0.191427	-1.29507	0.202573	0.507721
D3YVF0	A-kinase anchor protein 5	Akap5	-0.174586	-1.29543	0.202449	0.507721
O35887	Calumenin	Calu	0.164249	1.29541	0.202455	0.507721
O88532	Zinc finger RNA-binding protein	Zfr	-0.219253	-1.29634	0.202139	0.507721
P11031	Activated RNA polymerase II transcriptional coactivator p15	Sub1	-0.180277	-1.29505	0.202578	0.507721
P27048;P63163	Small nuclear ribonucleoprotein-associated protein B;Small nuclear ribonucleoprotein-associated protein N	Snrpb;Snrpn	-0.145428	-1.29823	0.201493	0.507721
P80313	T-complex protein 1 subunit eta	Cct7	-0.095578	-1.29896	0.201246	0.507721
Q02819	Nucleobindin-1	Nucb1	0.204544	1.29573	0.202345	0.507721
Q7TNG5	Echinoderm microtubule-associated protein-like 2	Eml2	0.259925	1.29614	0.202205	0.507721
Q9CQH7	Transcription factor BTF3 homolog 4	Btf3l4	0.19591	1.29873	0.201325	0.507721
Q9EPN1	Neurobeachin	Nbea	0.0865681	1.29642	0.202111	0.507721
Q91W61	F-box/LRR-repeat protein 15	Fbxl15	0.251341	1.29403	0.202926	0.508238
Q07076	Annexin A7	Anxa7	0.15705	1.29191	0.203653	0.509196
Q9D8B3	Charged multivesicular body protein 4b	Chmp4b	0.146389	1.29167	0.203735	0.509196
Q9EQK5	Major vault protein	Mvp	0.255954	1.29236	0.2035	0.509196
O35075	Down syndrome critical region protein 3 homolog	Dscr3	-0.192278	-1.28867	0.204768	0.51142
P20444	Protein kinase C alpha type	Prkca	-0.12909	-1.28735	0.205222	0.511483
Q68FL6	Methionine--tRNA ligase, cytoplasmic	Mars	0.148868	1.28745	0.205188	0.511483
Q923D2	Flavin reductase (NADPH)	Blvrb	0.17306	1.28743	0.205195	0.511483
Q62178	Semaphorin-4A	Sema4a	-0.163922	-1.2858	0.205758	0.51195
Q78PY7	Staphylococcal nuclease domain-containing protein 1	Snd1	0.0908233	1.28557	0.205838	0.51195
Q8VHY0	Chondroitin sulfate proteoglycan 4	Cspg4	0.115206	1.28564	0.205814	0.51195
E9Q8I9	Protein furry homolog	Fry	-0.241026	-1.28372	0.206477	0.512375
O54724	Polymerase I and transcript release factor	Ptrf	0.229755	1.28441	0.20624	0.512375
P10518	Delta-aminolevulinic acid dehydratase	Alad	0.474579	1.28419	0.206316	0.512375
Q61655;Q9QY15	ATP-dependent RNA helicase DDX19A	Ddx19a	-0.207336	-1.28342	0.206582	0.512375
Q9D6F9	Tubulin beta-4A chain	Tubb4a	-0.124809	-1.28197	0.207084	0.513265
Q8VDS4	Regulation of nuclear pre-mRNA domain-containing protein 1A	Rprd1a	-0.247257	-1.28153	0.20724	0.513294
Q9CQ92	Mitochondrial fission 1 protein	Fis1	0.176892	1.28007	0.207747	0.514195
O88998	Noelin	Olfm1	-0.1293	-1.27851	0.208289	0.514454
P84078	ADP-ribosylation factor 1	Arf1	0.413847	1.27812	0.208426	0.514454
Q3US41	Epithelial splicing regulatory protein 1	Esrp1	-0.357169	-1.27881	0.208186	0.514454
Q91YP2	Neurolysin, mitochondrial	Nln	0.239986	1.27818	0.208406	0.514454
P17182	Alpha-enolase	Eno1	-0.0734114	-1.27649	0.208996	0.515505
P97315	Cysteine and glycine-rich protein 1	Csrp1	0.13709	1.27552	0.209333	0.515626
Q8R123	FAD synthase;Molybdenum cofactor biosynthesis protein-like region;FAD synthase region	Flad1	-0.1249	-1.27555	0.209325	0.515626
Q8BTY1	Kynurenine--oxoglutarate transaminase 1	Ccbl1	-0.195104	-1.27398	0.209875	0.516603
O35129	Prohibitin-2	Phb2	-0.0942988	-1.27314	0.210172	0.516979
D3YZI9		Pgbd5	0.393415	1.27149	0.210749	0.517306
O70439	Syntaxin-7	Stx7	0.150732	1.27133	0.210806	0.517306
O88738	Baculoviral IAP repeat-containing protein 6	Birc6	-0.243798	-1.27095	0.210941	0.517306
Q8BFR5	Elongation factor Tu, mitochondrial	Tufm	-0.0889993	-1.27232	0.210458	0.517306
Q9Z1W9	STE20/SPS1-related proline-alanine-rich protein kinase	Stk39	-0.138522	-1.2707	0.211027	0.517306
Q9CXJ4	ATP-binding cassette sub-family B member 8, mitochondrial	Abcb8	-0.183965	-1.26927	0.211534	0.518193
Q78YZ6	Short coiled-coil protein	Scoc	-0.219976	-1.26808	0.211952	0.518861
Q9CWQ0	Diphthine synthase	Dph5	-0.312194	-1.26751	0.212156	0.519007
P61022	Calcineurin B homologous protein 1	Chp1	0.238091	1.26697	0.212346	0.519116
P56379	6.8 kDa mitochondrial proteolipid	Mp68	-0.168927	-1.26635	0.212564	0.519294
P62827	GTP-binding nuclear protein Ran	Ran	-0.125898	-1.26511	0.213004	0.51966
Q9D2R6	Cytochrome c oxidase assembly factor 3 homolog, mitochondrial	Coa3	-0.453681	-1.26548	0.212873	0.51966
Q8BG02	Serine/threonine-protein phosphatase 2A 55 kDa regulatory subunit B gamma isoform	Ppp2r2c	-0.160118	-1.26413	0.213354	0.520159
P70349	Histidine triad nucleotide-binding protein 1	Hint1	-0.147892	-1.26358	0.213548	0.520278
P80316	T-complex protein 1 subunit epsilon	Cct5	-0.0725649	-1.26302	0.213748	0.520411
Q8C0P5	Coronin-2A	Coro2a	0.181071	1.26231	0.214	0.520647
Q8VDQ8	NAD-dependent protein deacetylase sirtuin-2	Sirt2	0.136238	1.26156	0.214268	0.520647
Q9D164	FXYD domain-containing ion transport regulator 6	Fxyd6	-0.277887	-1.26152	0.214281	0.520647
Q9CQF9	Prenylcysteine oxidase	Pcyox1	0.118677	1.26066	0.214589	0.521042
P34022	Ran-specific GTPase-activating protein	Ranbp1	0.135736	1.2602	0.214752	0.521082
A2ASQ1	Agrin;Agrin N-terminal 110 kDa subunit;Agrin C-terminal 110 kDa subunit;Agrin C-terminal 90 kDa fragment;Agrin C-terminal 22 kDa fragment	Agrn	0.148913	1.25788	0.215583	0.522746
P27601	Guanine nucleotide-binding protein subunit alpha-13	Gna13	0.0974602	1.25588	0.216301	0.52295
P36552	Oxygen-dependent coproporphyrinogen-III oxidase, mitochondrial	Cpox	-0.123578	-1.25586	0.216305	0.52295
P62830	60S ribosomal protein L23	Rpl23	0.144143	1.25438	0.216837	0.52295
Q61879	Myosin-10	Myh10	-0.0670337	-1.25471	0.21672	0.52295
Q8CCB4	Vacuolar protein sorting-associated protein 53 homolog	Vps53	-0.211526	-1.25714	0.215847	0.52295
Q8R0Y8	Mitochondrial coenzyme A transporter SLC25A42	Slc25a42	-0.42393	-1.25654	0.216063	0.52295
Q8VD04	GRIP1-associated protein 1	Gripap1	0.200741	1.25488	0.216658	0.52295
Q9JL04	Formin-2	Fmn2	0.223297	1.25487	0.21666	0.52295
Q8CC88	von Willebrand factor A domain-containing protein 8	Vwa8	0.199127	1.25283	0.217396	0.523947
Q5NCF2	Trafficking protein particle complex subunit 1	Trappc1	-0.197158	-1.25085	0.218111	0.525214
Q60931	Voltage-dependent anion-selective channel protein 3	Vdac3	-0.128354	-1.25056	0.218215	0.525214
P04925	Major prion protein	Prnp	0.207288	1.24952	0.218591	0.525763
O08739	AMP deaminase 3	Ampd3	0.280695	1.24827	0.219044	0.526231
Q8K2Q5	Coiled-coil-helix-coiled-coil-helix domain-containing protein 7	Chchd7	0.104194	1.24777	0.219226	0.526231
Q9JHL1	Na(+)/H(+) exchange regulatory cofactor NHE-RF2	Slc9a3r2	-0.249883	-1.24807	0.219116	0.526231
Q9EPK2	Protein XRP2	Rp2	-0.221182	-1.24624	0.219781	0.52721
Q9JHU9	Inositol-3-phosphate synthase 1	Isyna1	0.243716	1.24577	0.21995	0.527261
Q02257	Junction plakoglobin	Jup	0.253376	1.24376	0.220681	0.528659
P16254	Signal recognition particle 14 kDa protein;Signal recognition particle 14 kDa protein, N-terminally processed	Srp14	-0.129492	-1.24217	0.221263	0.529432
Q80Y14	Glutaredoxin-related protein 5, mitochondrial	Glrx5	-0.149997	-1.24207	0.221299	0.529432
P61148	Fibroblast growth factor 1	Fgf1	-0.247279	-1.24062	0.22183	0.530346
Q9D7J4	Cytochrome c oxidase protein 20 homolog	Cox20	-0.176294	-1.23854	0.222591	0.531812
Q9D0R2	Threonine--tRNA ligase, cytoplasmic	Tars	-0.22005	-1.23802	0.222782	0.531912
Q3U186	Probable arginine--tRNA ligase, mitochondrial	Rars2	0.325304	1.23652	0.223333	0.532517
Q99JI4	26S proteasome non-ATPase regulatory subunit 6	Psmd6	-0.157185	-1.23654	0.223324	0.532517
P60670	Nuclear protein localization protein 4 homolog	Nploc4	0.129075	1.2349	0.223928	0.533512
P97379	Ras GTPase-activating protein-binding protein 2	G3bp2	-0.132399	-1.23285	0.224684	0.533512
Q6PDL0	Cytoplasmic dynein 1 light intermediate chain 2	Dync1li2	0.144351	1.23413	0.224213	0.533512
Q91Z31	Polypyrimidine tract-binding protein 2	Ptbp2	-0.165467	-1.23433	0.224136	0.533512
Q922Q1	Mitochondrial amidoxime reducing component 2	2023-03-02	-0.142143	-1.233	0.224628	0.533512
Q99KR7	Peptidyl-prolyl cis-trans isomerase F, mitochondrial	Ppif	-0.168459	-1.23294	0.224648	0.533512
Q9Z127;Q8BGK6	Large neutral amino acids transporter small subunit 1	Slc7a5	0.167212	1.23255	0.224794	0.533512
P48024	Eukaryotic translation initiation factor 1	Eif1	-0.111164	-1.23165	0.225128	0.533951
Q9R1L5	Microtubule-associated serine/threonine-protein kinase 1	Mast1	0.260562	1.23117	0.225305	0.534018
P70362	Ubiquitin fusion degradation protein 1 homolog	Ufd1l	0.198477	1.23034	0.225613	0.534393
Q80Y24	Prickle-like protein 2	Prickle2	0.252481	1.22806	0.226459	0.536042
Q8BZF8	Phosphoglucomutase-like protein 5	Pgm5	-0.189037	-1.22656	0.227016	0.537005
Q80WJ7	Protein LYRIC	Mtdh	0.112086	1.22458	0.227751	0.538035
Q9R0P5	Destrin	Dstn	-0.0922265	-1.22495	0.227613	0.538035
P03899	NADH-ubiquinone oxidoreductase chain 3	Mtnd3	-0.170635	-1.22361	0.228113	0.538084
Q8K2B3	Succinate dehydrogenase [ubiquinone] flavoprotein subunit, mitochondrial	Sdha	-0.0919048	-1.2235	0.228157	0.538084
Q91W90	Thioredoxin domain-containing protein 5	Txndc5	0.130471	1.22332	0.228223	0.538084
Q9CPX8	Cytochrome b-c1 complex subunit 10	Uqcr11	-0.208762	-1.22197	0.228728	0.538919
P27612	Phospholipase A-2-activating protein	Plaa	0.112301	1.21993	0.229491	0.539934
P62880	Guanine nucleotide-binding protein G(I)/G(S)/G(T) subunit beta-2	Gnb2	-0.0975605	-1.21961	0.229612	0.539934
Q8VCD6	Receptor expression-enhancing protein 2	Reep2	0.242425	1.22032	0.229347	0.539934
O35658	Complement component 1 Q subcomponent-binding protein, mitochondrial	C1qbp	0.159205	1.21427	0.231621	0.541188
P50429	Arylsulfatase B	Arsb	0.215239	1.21151	0.232665	0.541188
P58044	Isopentenyl-diphosphate Delta-isomerase 1	Idi1	0.292215	1.21195	0.232497	0.541188
P59808	SAM and SH3 domain-containing protein 1	Sash1	-0.261849	-1.21702	0.230586	0.541188
P62823	Ras-related protein Rab-3C	Rab3c	-0.0909132	-1.21734	0.230464	0.541188
Q3UHD1	Brain-specific angiogenesis inhibitor 1	Bai1	-0.294116	-1.21212	0.232434	0.541188
Q3UTJ2	Sorbin and SH3 domain-containing protein 2	Sorbs2	-0.16534	-1.21128	0.232753	0.541188
Q569Z6	Thyroid hormone receptor-associated protein 3	Thrap3	-0.240005	-1.21081	0.23293	0.541188
Q6NV83	U2 snRNP-associated SURP motif-containing protein	U2surp	-0.211868	-1.21195	0.2325	0.541188
Q6PB66	Leucine-rich PPR motif-containing protein, mitochondrial	Lrpprc	-0.111217	-1.21281	0.232172	0.541188
Q91Z38	Tetratricopeptide repeat protein 1	Ttc1	-0.177564	-1.2167	0.230705	0.541188
Q9CQ86	Migration and invasion enhancer 1	Mien1	-0.447748	-1.21028	0.233132	0.541188
Q9CQB5	CDGSH iron-sulfur domain-containing protein 2	Cisd2	-0.223026	-1.2126	0.232251	0.541188
Q9DB05	Alpha-soluble NSF attachment protein	Napa	-0.0955887	-1.21343	0.231938	0.541188
Q9EQ80	NIF3-like protein 1	Nif3l1	0.240056	1.21569	0.231087	0.541188
Q9JJV2	Profilin-2	Pfn2	0.0876727	1.21592	0.230998	0.541188
Q9QXJ1	Amyloid beta A4 precursor protein-binding family B member 1	Apbb1	-0.235285	-1.21062	0.233002	0.541188
Q9WUM5	Succinyl-CoA ligase [ADP/GDP-forming] subunit alpha, mitochondrial	Suclg1	-0.11871	-1.21452	0.231528	0.541188
Q9Z2D3	Non-syndromic hearing impairment protein 5 homolog	Dfna5	0.316671	1.21447	0.231547	0.541188
Q9Z2Q5	39S ribosomal protein L40, mitochondrial	Mrpl40	-0.187105	-1.21018	0.233169	0.541188
P22682	E3 ubiquitin-protein ligase CBL	Cbl	-0.198709	-1.20856	0.233786	0.541566
Q05512	Serine/threonine-protein kinase MARK2	Mark2	-0.121975	-1.20879	0.233698	0.541566
Q61418	H(+)/Cl(-) exchange transporter 4	Clcn4	-0.295583	-1.20869	0.233735	0.541566
Q80TZ3	Putative tyrosine-protein phosphatase auxilin	Dnajc6	-0.0685411	-1.2069	0.234418	0.542087
Q9CYW4	Haloacid dehalogenase-like hydrolase domain-containing protein 3	Hdhd3	0.388226	1.20677	0.234465	0.542087
Q9WV02	RNA-binding motif protein, X chromosome;RNA-binding motif protein, X chromosome, N-terminally processed	Rbmx	-0.124137	-1.20713	0.23433	0.542087
Q60865	Caprin-1	Caprin1	0.108897	1.20529	0.235031	0.543044
Q9Z1S5	Neuronal-specific septin-3	2023-09-03	-0.0880652	-1.20456	0.235311	0.543341
Q3UVK0	Endoplasmic reticulum metallopeptidase 1	Ermp1	0.208542	1.20268	0.236027	0.544642
A2A5R2	Brefeldin A-inhibited guanine nucleotide-exchange protein 2	Arfgef2	-0.21039	-1.20064	0.236809	0.544778
P45376	Aldose reductase	Akr1b1	0.106185	1.202	0.236289	0.544778
P62192	26S protease regulatory subunit 4	Psmc1	-0.10844	-1.20085	0.236732	0.544778
Q91WD5	NADH dehydrogenase [ubiquinone] iron-sulfur protein 2, mitochondrial	Ndufs2	-0.0701575	-1.20097	0.236682	0.544778
Q9DCH4	Eukaryotic translation initiation factor 3 subunit F	Eif3f	-0.185089	-1.20055	0.236847	0.544778
P63280	SUMO-conjugating enzyme UBC9	Ube2i	-0.263612	-1.19698	0.23822	0.547584
Q8BPQ7	Small G protein signaling modulator 1	Sgsm1	-0.152672	-1.19538	0.238836	0.548649
Q0VBD0	Integrin beta	Itgb8	0.170342	1.19302	0.239749	0.550039
Q8K0Z7	Translational activator of cytochrome c oxidase 1	Taco1	-0.223745	-1.1933	0.239639	0.550039
P97493	Thioredoxin, mitochondrial	Txn2	0.281631	1.19148	0.240345	0.551053
P28665	Murinoglobulin-1	Mug1	0.454424	1.19037	0.240778	0.551694
Q61081	Hsp90 co-chaperone Cdc37;Hsp90 co-chaperone Cdc37, N-terminally processed	Cdc37	-0.0902025	-1.18993	0.240949	0.551731
P01027	Complement C3;Complement C3 beta chain;C3-beta-c;Complement C3 alpha chain;C3a anaphylatoxin;Acylation stimulating protein;Complement C3b alpha chain;Complement C3c alpha chain fragment 1;Complement C3dg fragment;Complement C3g fragment;Complement C3d fragment;Complement C3f fragment;Complement C3c alpha chain fragment 2	C3	0.438514	1.18889	0.241351	0.5523
Q8BZA9	Fructose-2,6-bisphosphatase TIGAR	Tigar	0.24019	1.18677	0.242176	0.553833
Q64737	Trifunctional purine biosynthetic protein adenosine-3;Phosphoribosylamine--glycine ligase;Phosphoribosylformylglycinamidine cyclo-ligase;Phosphoribosylglycinamide formyltransferase	Gart	-0.183286	-1.18509	0.242834	0.554984
Q8BNY6	Neuronal calcium sensor 1	Ncs1	-0.216508	-1.18422	0.243175	0.555053
Q91V41	Ras-related protein Rab-14	Rab14	-0.0986021	-1.18454	0.243048	0.555053
P59764	Dedicator of cytokinesis protein 4	Dock4	-0.0921818	-1.18198	0.244053	0.555441
Q68ED7	CREB-regulated transcription coactivator 1	Crtc1	-0.181762	-1.18166	0.244179	0.555441
Q80VP9	Aspartate beta-hydroxylase domain-containing protein 2	Asphd2	-0.188845	-1.18281	0.243728	0.555441
Q922Y1	UBX domain-containing protein 1	Ubxn1	0.259751	1.18141	0.244276	0.555441
Q9JMD0	BUB3-interacting and GLEBS motif-containing protein ZNF207	Znf207	-0.195821	-1.18258	0.243817	0.555441
Q9Z268	RasGAP-activating-like protein 1	Rasal1	-0.104778	-1.18332	0.243528	0.555441
Q8VEA4	Mitochondrial intermembrane space import and assembly protein 40	Chchd4	0.202045	1.18041	0.244667	0.555978
P61750	ADP-ribosylation factor 4	Arf4	0.181296	1.18001	0.244826	0.555986
Q9CRC8	Leucine-rich repeat-containing protein 40	Lrrc40	0.621226	1.1791	0.245185	0.556448
P80314	T-complex protein 1 subunit beta	Cct2	-0.0622365	-1.17866	0.245357	0.556486
P70704	Phospholipid-transporting ATPase IA	Atp8a1	-0.0820791	-1.17757	0.245788	0.556802
Q8BYI8	Uncharacterized protein KIAA1467	Kiaa1467	0.160282	1.17752	0.245808	0.556802
P83870	PHD finger-like domain-containing protein 5A	Phf5a	-0.24027	-1.17696	0.246028	0.556949
Q80XQ2	TBC1 domain family member 5	Tbc1d5	0.506637	1.17546	0.24662	0.557936
Q9Z0Y1	Dynactin subunit 3	Dctn3	-0.173301	-1.17492	0.246832	0.558063
O08917	Flotillin-1	Flot1	0.123742	1.17401	0.247193	0.558525
Q61205	Platelet-activating factor acetylhydrolase IB subunit gamma	Pafah1b3	0.204015	1.17327	0.247488	0.558838
A2ALS5	Rap1 GTPase-activating protein 1	Rap1gap	-0.110879	-1.17201	0.247988	0.559616
Q99KH8;Q99JT2;Q9Z2W1	Serine/threonine-protein kinase 24;Serine/threonine-protein kinase 24 35 kDa subunit;Serine/threonine-protein kinase 24 12 kDa subunit	Stk24	0.16073	1.17153	0.248179	0.559693
O35609	Secretory carrier-associated membrane protein 3	Scamp3	0.131496	1.17106	0.248365	0.55976
Q99L13	3-hydroxyisobutyrate dehydrogenase, mitochondrial	Hibadh	-0.147097	-1.17011	0.248743	0.560259
O55137;Q8BWN8	Acyl-coenzyme A thioesterase 1	Acot1	-0.264524	-1.16932	0.249054	0.560607
P97445	Voltage-dependent P/Q-type calcium channel subunit alpha-1A	Cacna1a	-0.214304	-1.16847	0.249394	0.561018
Q61292	Laminin subunit beta-2	Lamb2	-0.194147	-1.16726	0.249878	0.561756
P28658	Ataxin-10	Atxn10	-0.180829	-1.16457	0.250951	0.563808
Q8CCT4	Transcription elongation factor A protein-like 5	Tceal5	0.198795	1.16419	0.251106	0.563808
P99027	60S acidic ribosomal protein P2	Rplp2	-0.113545	-1.16353	0.251371	0.564047
Q9WTX6	Cullin-1	Cul1	-0.18718	-1.16289	0.251625	0.564264
Q5U5Q9	BRCA1-A complex subunit RAP80	Uimc1	-0.17083	-1.16137	0.252237	0.565284
O70311	Glycylpeptide N-tetradecanoyltransferase 2	Nmt2	-0.182263	-1.15914	0.253133	0.565337
P42567	Epidermal growth factor receptor substrate 15	Eps15	-0.232023	-1.15831	0.253468	0.565337
P49722	Proteasome subunit alpha type-2	Psma2	0.10766	1.15954	0.252971	0.565337
Q05793	Basement membrane-specific heparan sulfate proteoglycan core protein;Endorepellin;LG3 peptide	Hspg2	-0.261706	-1.1583	0.253471	0.565337
Q07813	Apoptosis regulator BAX	Bax	-0.329557	-1.15931	0.253064	0.565337
Q6PA06	Atlastin-2	Atl2	-0.176274	-1.15817	0.253525	0.565337
Q9JIA7	Sphingosine kinase 2	Sphk2	-0.18582	-1.15989	0.252833	0.565337
Q9Z2D1	Myotubularin-related protein 2	Mtmr2	-0.282907	-1.15973	0.252898	0.565337
A2AG50	MAP7 domain-containing protein 2	Map7d2	-0.315907	-1.15759	0.253761	0.56551
Q8BIF2	RNA binding protein fox-1 homolog 3	Rbfox3	-0.123666	-1.15674	0.254102	0.565801
Q920N7	Synaptotagmin-12	Syt12	-0.151989	-1.15644	0.254224	0.565801
Q9D187	Mitotic spindle-associated MMXD complex subunit MIP18	Fam96b	-0.185491	-1.15609	0.254365	0.565801
P55302	Alpha-2-macroglobulin receptor-associated protein	Lrpap1	0.149202	1.15421	0.255126	0.566791
Q4V9Z5	Seizure 6-like protein 2	Sez6l2	0.129148	1.15382	0.255286	0.566791
Q9QUR7	Peptidyl-prolyl cis-trans isomerase NIMA-interacting 1	Pin1	-0.106959	-1.1542	0.255129	0.566791
Q9CPQ8	ATP synthase subunit g, mitochondrial	Atp5l	-0.129871	-1.15285	0.255676	0.567306
Q9D2V7	Coronin-7	Coro7	0.117673	1.15196	0.256038	0.567758
Q7TQ95	Protein lunapark	Lnp	-0.140578	-1.14958	0.257005	0.569549
Q64012	RNA-binding protein Raly	Raly	-0.138563	-1.1471	0.258017	0.571123
Q6IR34	G-protein-signaling modulator 1	Gpsm1	-0.200702	-1.14706	0.258035	0.571123
Q9CQ54	NADH dehydrogenase [ubiquinone] 1 subunit C2	Ndufc2	-0.157057	-1.14533	0.258741	0.572333
Q99LE6	ATP-binding cassette sub-family F member 2	Abcf2	-0.196836	-1.14416	0.25922	0.573039
Q0PMG2	MAM domain-containing glycosylphosphatidylinositol anchor protein 1	Mdga1	0.204897	1.14158	0.260282	0.574194
Q3UYH7	Beta-adrenergic receptor kinase 2	Adrbk2	-0.184126	-1.1418	0.260188	0.574194
Q6PIE5;Q9Z1W8	Sodium/potassium-transporting ATPase subunit alpha-2	Atp1a2	0.0756014	1.14185	0.260171	0.574194
Q9EP89	Serine beta-lactamase-like protein LACTB, mitochondrial	Lactb	-0.409361	-1.14133	0.260385	0.574194
Q80VC9	Calmodulin-regulated spectrin-associated protein 3	Camsap3	-0.189048	-1.14013	0.260878	0.5742
Q8VBZ3	Cleft lip and palate transmembrane protein 1 homolog	Clptm1	-0.13186	-1.13976	0.261029	0.5742
Q91WC0	Histone-lysine N-methyltransferase setd3	Setd3	0.235564	1.14026	0.260823	0.5742
Q9R1P0	Proteasome subunit alpha type-4	Psma4	-0.0840591	-1.13997	0.26094	0.5742
Q9D1H6	NADH dehydrogenase [ubiquinone] 1 alpha subcomplex assembly factor 4	Ndufaf4	-0.211964	-1.13912	0.261293	0.574428
Q8BPE4	Transmembrane protein 177	Tmem177	-0.218175	-1.13672	0.262284	0.576252
P16332	Methylmalonyl-CoA mutase, mitochondrial	Mut	-0.190805	-1.13596	0.262598	0.576587
P80317	T-complex protein 1 subunit zeta	Cct6a	-0.0677841	-1.13396	0.263425	0.577695
Q8BLV3	Sodium/hydrogen exchanger 7	Slc9a7	0.220512	1.13402	0.263399	0.577695
Q6P9R2	Serine/threonine-protein kinase OSR1	Oxsr1	0.262291	1.13297	0.263837	0.57789
Q9ERF3	WD repeat-containing protein 61;WD repeat-containing protein 61, N-terminally processed	Wdr61	0.187398	1.13314	0.263767	0.57789
Q9WTL7	Acyl-protein thioesterase 2	Lypla2	-0.253251	-1.13235	0.264093	0.578098
P10637	Microtubule-associated protein tau	Mapt	-0.0931603	-1.13148	0.264453	0.578179
Q3B7Z2	Oxysterol-binding protein 1	Osbp	-0.132189	-1.13162	0.264399	0.578179
P08030	Adenine phosphoribosyltransferase	Aprt	0.14344	1.12814	0.265845	0.580239
Q80Z24	Neuronal growth regulator 1	Negr1	-0.128406	-1.12612	0.266693	0.580239
Q8BWM0	Prostaglandin E synthase 2;Prostaglandin E synthase 2 truncated form	Ptges2	-0.161673	-1.12615	0.266679	0.580239
Q8C8N2	Protein SCAI	Scai	-0.137006	-1.12751	0.26611	0.580239
Q8CH09	SURP and G-patch domain-containing protein 2	Sugp2	0.208143	1.12624	0.266642	0.580239
Q8CI75	DIS3-like exonuclease 2	Dis3l2	0.174734	1.12664	0.266472	0.580239
Q91ZH7	Phospholipase ABHD3	Abhd3	-0.178783	-1.12823	0.265807	0.580239
Q9QYS9	Protein quaking	Qki	0.228498	1.12689	0.266367	0.580239
Q9D7H3	RNA 3-terminal phosphate cyclase	RtcA	-0.281576	-1.12556	0.266924	0.580389
Q64442	Sorbitol dehydrogenase	Sord	0.13292	1.12441	0.267405	0.581082
P17710;O08528;Q91W97;Q3TRM8	Hexokinase-1	Hk1	-0.056518	-1.1223	0.268293	0.581152
P42125	Enoyl-CoA delta isomerase 1, mitochondrial	Eci1	-0.131231	-1.12391	0.267618	0.581152
P83940	Transcription elongation factor B polypeptide 1	Tceb1	-0.169969	-1.12256	0.268184	0.581152
Q6ZQ08	CCR4-NOT transcription complex subunit 1	Cnot1	-0.241331	-1.12253	0.268195	0.581152
Q8BGT8	Phytanoyl-CoA hydroxylase-interacting protein-like	Phyhipl	-0.0864647	-1.12195	0.268439	0.581152
Q8BWT1	3-ketoacyl-CoA thiolase, mitochondrial	Acaa2	-0.135852	-1.12328	0.267879	0.581152
Q9CPR4	60S ribosomal protein L17	Rpl17	-0.268355	-1.12163	0.268574	0.581152
P28667	MARCKS-related protein	Marcksl1	0.185755	1.12023	0.269162	0.581196
P41105	60S ribosomal protein L28	Rpl28	-0.231148	-1.12048	0.269059	0.581196
Q05D44	Eukaryotic translation initiation factor 5B	Eif5b	0.310016	1.11994	0.269285	0.581196
Q62186	Translocon-associated protein subunit delta	Ssr4	0.284688	1.11965	0.269406	0.581196
Q9QZ23	NFU1 iron-sulfur cluster scaffold homolog, mitochondrial	Nfu1	-0.143584	-1.12059	0.269012	0.581196
O88507	Ciliary neurotrophic factor receptor subunit alpha	Cntfr	-0.285305	-1.1184	0.269932	0.58163
Q8BTM8	Filamin-A	Flna	0.273509	1.11846	0.269907	0.58163
Q8VCF0	Mitochondrial antiviral-signaling protein	Mavs	0.150662	1.11714	0.270467	0.582081
Q9WV54	Acid ceramidase;Acid ceramidase subunit alpha;Acid ceramidase subunit beta	Asah1	-0.141734	-1.11749	0.270316	0.582081
P63216	Guanine nucleotide-binding protein G(I)/G(S)/G(O) subunit gamma-3	Gng3	-0.136832	-1.11547	0.271171	0.582895
Q3UFS0	Protein zyg-11 homolog B	Zyg11b	-0.224496	-1.11572	0.271067	0.582895
Q61686	Chromobox protein homolog 5	Cbx5	0.159952	1.11488	0.271421	0.583083
Q9Z160	Conserved oligomeric Golgi complex subunit 1	Cog1	0.219832	1.11324	0.272118	0.584228
Q9JKN6	RNA-binding protein Nova-1	Nova1	-0.22455	-1.11261	0.272386	0.584454
O35326	Serine/arginine-rich splicing factor 5	Srsf5	0.225067	1.11155	0.272832	0.584764
Q64322	Neural proliferation differentiation and control protein 1	Npdc1	0.287657	1.1115	0.272857	0.584764
Q3UHX2	28 kDa heat- and acid-stable phosphoprotein	Pdap1	-0.147511	-1.11067	0.273207	0.584962
Q8BGN3	Ectonucleotide pyrophosphatase/phosphodiesterase family member 6	Enpp6	0.242264	1.11051	0.273276	0.584962
Q8BK08	Transmembrane protein 11, mitochondrial	Tmem11	0.366282	1.10977	0.273592	0.585288
P54830	Tyrosine-protein phosphatase non-receptor type 5	Ptpn5	0.236283	1.10881	0.274003	0.585815
Q99PL6	UBX domain-containing protein 6	Ubxn6	-0.0788622	-1.10706	0.274747	0.587056
P61294	Ras-related protein Rab-6B	Rab6b	-0.0963733	-1.10436	0.275902	0.589172
Q80WQ2	Protein VAC14 homolog	Vac14	0.220796	1.10354	0.276253	0.589218
Q9QZQ1	Afadin	Mllt4	-0.178006	-1.10365	0.276209	0.589218
P16460	Argininosuccinate synthase	Ass1	0.135329	1.10313	0.276431	0.589248
Q9CZX9	ER membrane protein complex subunit 4	Emc4	-0.223714	-1.10202	0.276905	0.589907
Q9JKV5	Secretory carrier-associated membrane protein 4	Scamp4	0.153292	1.10031	0.277641	0.591122
Q3TIV5	Zinc finger CCCH domain-containing protein 15	Zc3h15	0.198482	1.0997	0.277904	0.59133
Q3V1U8	ELMO domain-containing protein 1	Elmod1	-0.158151	-1.09871	0.278332	0.591629
Q8BGS7	Choline/ethanolaminephosphotransferase 1	Cept1	0.179284	1.09808	0.278602	0.591629
Q8BVU5	ADP-ribose pyrophosphatase, mitochondrial	Nudt9	0.203543	1.09784	0.278706	0.591629
Q8C0Y0	Serine/threonine-protein phosphatase 4 regulatory subunit 4	Ppp4r4	-0.180377	-1.09855	0.278402	0.591629
P11627	Neural cell adhesion molecule L1	L1cam	-0.122764	-1.09645	0.279306	0.592553
Q8C3W1	Uncharacterized protein C1orf198 homolog		0.146383	1.09508	0.279899	0.593107
Q9CZT8	Ras-related protein Rab-3B	Rab3b	-0.136148	-1.09531	0.279798	0.593107
Q921F4	Heterogeneous nuclear ribonucleoprotein L-like	Hnrnpll	-0.125645	-1.09416	0.280297	0.5936
Q62426	Cystatin-B	Cstb	0.186647	1.09265	0.280952	0.594283
Q9Z2I0	LETM1 and EF-hand domain-containing protein 1, mitochondrial	Letm1	0.0599325	1.09276	0.280905	0.594283
Q9ERT9	Protein phosphatase 1 regulatory subunit 1A	Ppp1r1a	-0.109791	-1.09219	0.281151	0.594353
Q8BK30	NADH dehydrogenase [ubiquinone] flavoprotein 3, mitochondrial	Ndufv3	-0.110524	-1.0905	0.281889	0.59556
P97461	40S ribosomal protein S5;40S ribosomal protein S5, N-terminally processed	Rps5	-0.110033	-1.0899	0.282147	0.595566
Q3UM45	Protein phosphatase 1 regulatory subunit 7	Ppp1r7	0.092977	1.08973	0.282224	0.595566
Q99KY4	Cyclin-G-associated kinase	Gak	-0.133633	-1.08856	0.282731	0.596284
P05532	Mast/stem cell growth factor receptor Kit	Kit	0.202907	1.08751	0.283191	0.596711
Q7TMM9	Tubulin beta-2A chain	Tubb2a	0.152619	1.08733	0.283267	0.596711
Q9JJ61	Polypeptide N-acetylgalactosaminyltransferase 16	Galnt16	0.318153	1.08651	0.283625	0.597114
P54754;Q62413;Q61772	Ephrin type-B receptor 3;Ephrin type-A receptor 6	Ephb3;Epha6	-0.176519	-1.08562	0.284016	0.597234
Q80U49	Centrosomal protein of 170 kDa protein B	Cep170b	-0.146594	-1.08592	0.283885	0.597234
Q3U487	E3 ubiquitin-protein ligase HECTD3	Hectd3	-0.166607	-1.08257	0.285351	0.59969
Q91WK5	Glycine cleavage system H protein, mitochondrial	Gcsh	0.226705	1.08162	0.285771	0.600219
S4R1M9	Oxysterol-binding protein	Osbpl10	-0.220018	-1.08109	0.286001	0.60035
Q6NSW3	A-kinase anchor protein SPHKAP	Sphkap	0.252793	1.0801	0.286435	0.60091
O35188	Fractalkine;Processed fractalkine	Cx3cl1	-0.208782	-1.07862	0.287089	0.601105
Q61016	Guanine nucleotide-binding protein G(I)/G(S)/G(O) subunit gamma-7	Gng7	-0.138425	-1.07923	0.286819	0.601105
Q9D554	Splicing factor 3A subunit 3	Sf3a3	0.147935	1.07837	0.2872	0.601105
Q9DBG6	Dolichyl-diphosphooligosaccharide--protein glycosyltransferase subunit 2	Rpn2	0.107377	1.0784	0.287187	0.601105
Q3UJB9	Enhancer of mRNA-decapping protein 4	Edc4	-0.161066	-1.07629	0.288115	0.602667
P47934	Carnitine O-acetyltransferase	Crat	-0.233882	-1.0759	0.288289	0.602679
Q60631	Growth factor receptor-bound protein 2	Grb2	-0.133904	-1.07459	0.288867	0.603535
P57776	Elongation factor 1-delta	Eef1d	0.0742105	1.07397	0.289141	0.603755
O35954	Membrane-associated phosphatidylinositol transfer protein 1	Pitpnm1	-0.0937345	-1.07072	0.290583	0.603832
O55091	Protein IMPACT	Impact	0.117947	1.07068	0.290601	0.603832
O88935	Synapsin-1	Syn1	-0.0854261	-1.07022	0.290806	0.603832
P49962	Signal recognition particle 9 kDa protein	Srp9	0.123414	1.07273	0.289694	0.603832
Q61165	Sodium/hydrogen exchanger 1	Slc9a1	-0.163431	-1.0717	0.290147	0.603832
Q61753	D-3-phosphoglycerate dehydrogenase	Phgdh	-0.0840173	-1.06992	0.290938	0.603832
Q8K354	Carbonyl reductase [NADPH] 3	Cbr3	-0.110791	-1.07164	0.290174	0.603832
Q8R464	Cell adhesion molecule 4	Cadm4	0.0864079	1.07344	0.289376	0.603832
Q9CXI5	Mesencephalic astrocyte-derived neurotrophic factor	Manf	-0.201372	-1.06971	0.291034	0.603832
Q9JKC6	Cell cycle exit and neuronal differentiation protein 1	Cend1	0.486618	1.07213	0.289957	0.603832
Q9Z2A5	Arginyl-tRNA--protein transferase 1	Ate1	-0.195571	-1.07019	0.290819	0.603832
O54991	Contactin-associated protein 1	Cntnap1	-0.0772776	-1.06814	0.291733	0.60483
P63321	Ras-related protein Ral-A	Rala	-0.107033	-1.06409	0.293543	0.60483
Q3TPX4	Exocyst complex component 5	Exoc5	0.246567	1.06752	0.29201	0.60483
Q5U458	DnaJ homolog subfamily C member 11	Dnajc11	-0.116631	-1.06406	0.293552	0.60483
Q80VP1	Epsin-1	Epn1	-0.11561	-1.06492	0.293168	0.60483
Q8R1Q8	Cytoplasmic dynein 1 light intermediate chain 1	Dync1li1	0.0760578	1.06478	0.293234	0.60483
Q91VI7	Ribonuclease inhibitor	Rnh1	0.102965	1.06743	0.29205	0.60483
Q91W39	Nuclear receptor coactivator 5	Ncoa5	0.205407	1.06371	0.293712	0.60483
Q91Z53	Glyoxylate reductase/hydroxypyruvate reductase	Grhpr	0.120998	1.06688	0.292296	0.60483
Q9CPS6	Histidine triad nucleotide-binding protein 3	Hint3	-0.237066	-1.06444	0.293385	0.60483
Q9CQ62	2,4-dienoyl-CoA reductase, mitochondrial	Decr1	0.118498	1.06656	0.292435	0.60483
Q9DB15	39S ribosomal protein L12, mitochondrial	Mrpl12	-0.115705	-1.06578	0.292785	0.60483
Q9ERR1;Q9CZA6	Nuclear distribution protein nudE-like 1	Ndel1	-0.27295	-1.0644	0.293403	0.60483
Q61166	Microtubule-associated protein RP/EB family member 1	Mapre1	0.144703	1.06207	0.294445	0.605055
Q925I1	ATPase family AAA domain-containing protein 3	Atad3	-0.124575	-1.06204	0.294462	0.605055
Q9D0F9	Phosphoglucomutase-1	Pgm1	-0.0647059	-1.06196	0.294497	0.605055
Q9ER00	Syntaxin-12	Stx12	0.10175	1.06262	0.294199	0.605055
Q6P8X1	Sorting nexin-6;Sorting nexin-6, N-terminally processed	Snx6	0.128231	1.05978	0.295473	0.606712
O89116	Vesicle transport through interaction with t-SNAREs homolog 1A	Vti1a	0.154458	1.05813	0.296217	0.607124
P56395	Cytochrome b5	Cyb5a	0.0923081	1.05744	0.296528	0.607124
P97384	Annexin A11	Anxa11	0.22823	1.05752	0.29649	0.607124
Q5SVL6	Rap1 GTPase-activating protein 2	Rap1gap2	-0.263094	-1.05639	0.296999	0.607124
Q8BVQ5	Protein phosphatase methylesterase 1	Ppme1	0.130414	1.05649	0.296957	0.607124
Q8K386	Ras-related protein Rab-15	Rab15	-0.221394	-1.05677	0.296828	0.607124
Q8VBW6	NEDD8-activating enzyme E1 regulatory subunit	Nae1	0.188838	1.05632	0.297031	0.607124
Q91ZM2;Q9JID9	SH2B adapter protein 1	Sh2b1	-0.160163	-1.05733	0.296579	0.607124
Q9QYJ3	DnaJ homolog subfamily B member 1	Dnajb1	-0.178624	-1.05494	0.297654	0.608051
Q3U4G3	Xyloside xylosyltransferase 1	Xxylt1	0.337462	1.05268	0.298679	0.609447
Q9D7A8	Armadillo repeat-containing protein 1	Armc1	-0.185536	-1.05299	0.298538	0.609447
D3Z7P3	Glutaminase kidney isoform, mitochondrial	Gls	-0.159	-1.05182	0.29907	0.609491
P35288	Ras-related protein Rab-23	Rab23	0.269781	1.05151	0.299211	0.609491
Q6ZWQ0	Nesprin-2	Syne2	0.525179	1.05225	0.298874	0.609491
D3YZP9	Coiled-coil domain-containing protein 6	Ccdc6	0.355873	1.04811	0.300751	0.610386
P0C0A3	Charged multivesicular body protein 6	Chmp6	-0.235984	-1.05009	0.299854	0.610386
P22892	AP-1 complex subunit gamma-1	Ap1g1	0.140618	1.04875	0.30046	0.610386
Q7TMB8	Cytoplasmic FMR1-interacting protein 1	Cyfip1	0.154515	1.04761	0.300983	0.610386
Q99JN2	Kelch-like protein 22	Klhl22	0.232481	1.04818	0.300721	0.610386
Q9CW03	Structural maintenance of chromosomes protein 3	Smc3	-0.260083	-1.04754	0.301015	0.610386
Q9DCT5	Stromal cell-derived factor 2	Sdf2	-0.262951	-1.04871	0.300481	0.610386
Q9Z1Q9	Valine--tRNA ligase	Vars	0.0769954	1.0477	0.300938	0.610386
P59481	VIP36-like protein	Lman2l	-0.188136	-1.04581	0.301799	0.61163
A2ADY9	Protein DDI1 homolog 2	Ddi2	-0.194576	-1.04403	0.302614	0.611896
P63260	Actin, cytoplasmic 2;Actin, cytoplasmic 2, N-terminally processed	Actg1	-0.066104	-1.04462	0.302342	0.611896
Q6P9S0	MTSS1-like protein	Mtss1l	0.172586	1.04457	0.302366	0.611896
Q80TL0	Protein phosphatase 1E	Ppm1e	-0.0662888	-1.04407	0.302596	0.611896
P23506	Protein-L-isoaspartate(D-aspartate) O-methyltransferase	Pcmt1	-0.0820346	-1.04262	0.303258	0.612851
P35505	Fumarylacetoacetase	Fah	0.13688	1.03955	0.304667	0.615203
Q91YM2	Rho GTPase-activating protein 35	Arhgap35	0.158058	1.03933	0.304765	0.615203
Q9DBC0	Selenoprotein O	Selo	-0.139799	-1.0389	0.304967	0.615263
Q6WVG3	BTB/POZ domain-containing protein KCTD12	Kctd12	0.0777934	1.03736	0.305673	0.616339
Q9DB73	NADH-cytochrome b5 reductase 1	Cyb5r1	-0.098616	-1.03663	0.306008	0.616667
Q8CHH9	Septin-8	2023-09-08	-0.0800493	-1.03569	0.306444	0.617199
Q811P8	Rho GTPase-activating protein 32	Arhgap32	-0.157898	-1.03516	0.306689	0.617345
Q9D8B4	NADH dehydrogenase [ubiquinone] 1 alpha subcomplex subunit 11	Ndufa11	-0.114199	-1.03443	0.307022	0.617668
Q8BZN6	Dedicator of cytokinesis protein 10	Dock10	0.341143	1.03403	0.30721	0.6177
A2ALU4;Q1W617;Q9QXN0	Protein Shroom2	Shroom2	-0.127793	-1.03347	0.307469	0.61782
P56387	Dynein light chain Tctex-type 3	Dynlt3	0.0985058	1.03315	0.307615	0.61782
Q9Z0P5	Twinfilin-2	Twf2	-0.158748	-1.03256	0.307886	0.618017
P63323	40S ribosomal protein S12	Rps12	-0.126666	-1.03009	0.309033	0.619625
Q8R574	Phosphoribosyl pyrophosphate synthase-associated protein 2	Prpsap2	-0.117794	-1.03015	0.309005	0.619625
Q6ZWM4	U6 snRNA-associated Sm-like protein LSm8	Lsm8	0.21119	1.02929	0.309402	0.620018
Q8K3H0	DCC-interacting protein 13-alpha	Appl1	-0.0848	-1.02832	0.309853	0.620573
P68510	14-3-3 protein eta	Ywhah	0.0927434	1.0272	0.310374	0.620921
Q8K4R4	Cytoplasmic phosphatidylinositol transfer protein 1	Pitpnc1	0.27351	1.0273	0.310326	0.620921
Q921G8	Gamma-tubulin complex component 2	Tubgcp2	-0.110558	-1.02605	0.310908	0.621235
Q99N93	39S ribosomal protein L16, mitochondrial	Mrpl16	-0.155467	-1.02574	0.311051	0.621235
Q9DB16	Calcium-binding protein 39-like	Cab39l	-0.296787	-1.026	0.310931	0.621235
Q4VAA2	Protein CDV3	Cdv3	0.146974	1.02489	0.311448	0.621679
P41216	Long-chain-fatty-acid--CoA ligase 1	Acsl1	-0.15447	-1.02406	0.311835	0.62179
Q99JG2	Prosaposin receptor GPR37L1	Gpr37l1	0.168122	1.02403	0.311851	0.62179
P97364	Selenide, water dikinase 2	Sephs2	-0.28403	-1.02303	0.312316	0.622113
Q8K2M0	39S ribosomal protein L38, mitochondrial	Mrpl38	-0.241308	-1.02265	0.312494	0.622113
Q9Z2D0	Myotubularin-related protein 9	Mtmr9	-0.181434	-1.02257	0.312534	0.622113
P34884	Macrophage migration inhibitory factor	Mif	-0.130347	-1.02075	0.313385	0.623459
O88967	ATP-dependent zinc metalloprotease YME1L1	Yme1l1	-0.13679	-1.01828	0.314542	0.623681
P00493	Hypoxanthine-guanine phosphoribosyltransferase	Hprt1	-0.0762432	-1.01902	0.314193	0.623681
P17809	Solute carrier family 2, facilitated glucose transporter member 1	Slc2a1	-0.179942	-1.01843	0.314469	0.623681
Q7TN99;Q812E0;Q7TN98	Cytoplasmic polyadenylation element-binding protein 3;Cytoplasmic polyadenylation element-binding protein 2;Cytoplasmic polyadenylation element-binding protein 4	Cpeb3;Cpeb2;Cpeb4	-0.195656	-1.01956	0.313943	0.623681
Q91WE1	Sorting nexin-15	Snx15	0.203618	1.01971	0.313872	0.623681
Q9JK48	Endophilin-B1	Sh3glb1	-0.136407	-1.01858	0.314401	0.623681
P04227;P14438;P14437;P14436;P14435;P23150;P14434;P04228;P01910	H-2 class II histocompatibility antigen, A-Q alpha chain;H-2 class II histocompatibility antigen, A-U alpha chain;H-2 class II histocompatibility antigen, A-S alpha chain;H-2 class II histocompatibility antigen, A-R alpha chain;H-2 class II histocompatibility antigen, A-F alpha chain;H-2 class II histocompatibility antigen, I-E alpha chain;H-2 class II histocompatibility antigen, A-B alpha chain;…	H2-Aa	-0.15685	-1.01746	0.314928	0.624016
P10852	4F2 cell-surface antigen heavy chain	Slc3a2	0.0911796	1.01636	0.315444	0.624016
P31648	Sodium- and chloride-dependent GABA transporter 1	Slc6a1	-0.109096	-1.01572	0.315746	0.624016
Q99K10	Neuroligin-1	Nlgn1	0.411421	1.0164	0.315426	0.624016
Q9CRC0	Vitamin K epoxide reductase complex subunit 1	Vkorc1	0.140311	1.01638	0.315435	0.624016
Q9R1R2	Tripartite motif-containing protein 3	Trim3	-0.0800241	-1.01569	0.315757	0.624016
P35285	Ras-related protein Rab-22A	Rab22a	0.16081	1.01454	0.316301	0.62442
Q64213	Splicing factor 1	Sf1	0.176025	1.01452	0.31631	0.62442
P84309	Adenylate cyclase type 5	Adcy5	-0.186078	-1.01338	0.316845	0.624786
Q9D1H7	Golgi to ER traffic protein 4 homolog	Get4	-0.210764	-1.0135	0.316789	0.624786
Q920Q6	RNA-binding protein Musashi homolog 2	Msi2	0.14025	1.0129	0.317074	0.624894
F7BWT7	Tetraspanin-15	Tspan15	0.14245	1.01042	0.318247	0.625313
O08638	Myosin-11	Myh11	-0.843599	-1.00992	0.318483	0.625313
P62315	Small nuclear ribonucleoprotein Sm D1	Snrpd1	0.206182	1.01109	0.31793	0.625313
P97370	Sodium/potassium-transporting ATPase subunit beta-3	Atp1b3	0.114046	1.00944	0.318711	0.625313
Q00PI9	Heterogeneous nuclear ribonucleoprotein U-like protein 2	Hnrnpul2	-0.0785615	-1.01156	0.317707	0.625313
Q3V3R1	Monofunctional C1-tetrahydrofolate synthase, mitochondrial	Mthfd1l	-0.228716	-1.00905	0.318893	0.625313
Q6PAK3	Protein arginine N-methyltransferase 8	Prmt8	-0.277903	-1.0112	0.317876	0.625313
Q71M36	Chondroitin sulfate proteoglycan 5	Cspg5	0.231028	1.00875	0.319033	0.625313
Q8BMP6	Golgi resident protein GCP60	Acbd3	-0.164913	-1.00943	0.318715	0.625313
Q99KF1	Transmembrane emp24 domain-containing protein 9	Tmed9	-0.21921	-1.01055	0.318184	0.625313
P58158	Galactosylgalactosylxylosylprotein 3-beta-glucuronosyltransferase 3	B3gat3	0.139385	1.0077	0.319532	0.625604
Q8CG76	Aflatoxin B1 aldehyde reductase member 2	Akr7a2	-0.139132	-1.00802	0.319384	0.625604
P12382	ATP-dependent 6-phosphofructokinase, liver type	Pfkl	-0.0719173	-1.00574	0.320465	0.626062
P48722	Heat shock 70 kDa protein 4L	Hspa4l	-0.0583196	-1.00596	0.320361	0.626062
Q64487	Receptor-type tyrosine-protein phosphatase delta	Ptprd	0.112275	1.0068	0.319959	0.626062
Q8QZS1	3-hydroxyisobutyryl-CoA hydrolase, mitochondrial	Hibch	0.120681	1.00632	0.320188	0.626062
Q03141	MAP/microtubule affinity-regulating kinase 3	Mark3	-0.12522	-1.00391	0.321337	0.627422
Q8BGD5	Carnitine O-palmitoyltransferase 1, brain isoform	Cpt1c	0.137297	1.00353	0.321514	0.627426
Q8BX70	Vacuolar protein sorting-associated protein 13C	Vps13c	-0.196131	-1.00235	0.322079	0.628185
Q6PHU5	Sortilin	Sort1	0.135509	1.00155	0.322459	0.628214
Q8VDD5	Myosin-9	Myh9	0.0866914	1.00129	0.322583	0.628214
Q9EP72	ER membrane protein complex subunit 7	Emc7	0.195956	1.00121	0.32262	0.628214
P61922	4-aminobutyrate aminotransferase, mitochondrial	Abat	-0.0751387	-1.00039	0.323015	0.62864
P24472	Glutathione S-transferase A4	Gsta4	-0.0891284	-0.999364	0.323505	0.62891
P56959	RNA-binding protein FUS	Fus	0.194381	0.999596	0.323394	0.62891
Q9CYS6	Uncharacterized protein C2orf72 homolog		0.296192	0.997421	0.324435	0.630376
Q7TT50	Serine/threonine-protein kinase MRCK beta	Cdc42bpb	-0.138216	-0.996129	0.325055	0.630896
Q9JKK1	Syntaxin-6	Stx6	-0.145817	-0.996132	0.325053	0.630896
B2RSH2;P50149;Q3V3I2	Guanine nucleotide-binding protein G(i) subunit alpha-1	Gnai1	-0.105036	-0.994733	0.325725	0.631512
Q8R570	Synaptosomal-associated protein 47	Snap47	-0.0701341	-0.994735	0.325724	0.631512
Q9QYC0	Alpha-adducin	Add1	-0.0602213	-0.993701	0.326222	0.632132
Q3V132	ADP/ATP translocase 4;ADP/ATP translocase 4, N-terminally processed	Slc25a31	-0.200542	-0.989051	0.328464	0.636131
P63168	Dynein light chain 1, cytoplasmic	Dynll1	-0.100436	-0.988074	0.328936	0.636702
P63325	40S ribosomal protein S10	Rps10	-0.227885	-0.987253	0.329333	0.637126
Q91VF2	Histamine N-methyltransferase	Hnmt	-0.204021	-0.98685	0.329528	0.63716
O70503	Very-long-chain 3-oxoacyl-CoA reductase	Hsd17b12	0.152301	0.985476	0.330195	0.637976
P14152	Malate dehydrogenase, cytoplasmic	Mdh1	-0.0649254	-0.985244	0.330307	0.637976
P84104	Serine/arginine-rich splicing factor 3	Srsf3	-0.120298	-0.984031	0.330896	0.638424
Q91YI0	Argininosuccinate lyase	Asl	0.176977	0.984215	0.330807	0.638424
Q9QZB7	Actin-related protein 10	Actr10	0.0872811	0.982749	0.331519	0.639282
Q8CDG3	Deubiquitinating protein VCIP135	Vcpip1	-0.156075	-0.98112	0.332312	0.640466
Q7TMC8		Fuk	-0.22574	-0.98064	0.332546	0.640571
P54227	Stathmin	Stmn1	0.192084	0.979265	0.333216	0.641469
Q3UEB3	Poly(U)-binding-splicing factor PUF60	Puf60	-0.23296	-0.978215	0.333729	0.641469
Q9D0M3	Cytochrome c1, heme protein, mitochondrial	Cyc1	-0.0776055	-0.978373	0.333652	0.641469
Q9WV18	Gamma-aminobutyric acid type B receptor subunit 1	Gabbr1	0.192414	0.978877	0.333406	0.641469
P81117	Nucleobindin-2;Nesfatin-1	Nucb2	0.189304	0.97765	0.334005	0.641656
E9Q7X7		Nrxn2	0.183011	0.974417	0.335588	0.641662
O88848	ADP-ribosylation factor-like protein 6	Arl6	-0.169371	-0.975063	0.335271	0.641662
P31230	Aminoacyl tRNA synthase complex-interacting multifunctional protein 1;Endothelial monocyte-activating polypeptide 2	Aimp1	-0.0867213	-0.9766	0.334519	0.641662
P56480	ATP synthase subunit beta, mitochondrial	Atp5b	-0.0627214	-0.975447	0.335083	0.641662
Q5EG47	5-AMP-activated protein kinase catalytic subunit alpha-1	Prkaa1	-0.107802	-0.975976	0.334824	0.641662
Q6W8Q3	Purkinje cell protein 4-like protein 1	Pcp4l1	0.447652	0.975432	0.335091	0.641662
Q6ZWX6	Eukaryotic translation initiation factor 2 subunit 1	Eif2s1	-0.14309	-0.975944	0.33484	0.641662
Q9D906	Ubiquitin-like modifier-activating enzyme ATG7	Atg7	-0.0718896	-0.974347	0.335622	0.641662
Q9WU28	Prefoldin subunit 5	Pfdn5	-0.140346	-0.975175	0.335216	0.641662
Q2M3X8	Phosphatase and actin regulator 1	Phactr1	-0.171598	-0.97377	0.335905	0.64186
P16388	Potassium voltage-gated channel subfamily A member 1	Kcna1	0.205907	0.972573	0.336493	0.642133
Q80UP8	Sodium-dependent phosphate transporter 2	Slc20a2	0.1904	0.972563	0.336498	0.642133
Q8C561	LMBR1 domain-containing protein 2	Lmbrd2	0.155044	0.972383	0.336586	0.642133
Q9R111	Guanine deaminase	Gda	-0.0656768	-0.971175	0.33718	0.642923
Q9ESM3	Hyaluronan and proteoglycan link protein 2	Hapln2	0.240252	0.970365	0.337578	0.64334
Q9QYI5	DnaJ homolog subfamily B member 2	Dnajb2	-0.188475	-0.969648	0.337932	0.643671
Q0VE82	Copine-7	Cpne7	-0.141364	-0.968894	0.338303	0.644035
O70310	Glycylpeptide N-tetradecanoyltransferase 1	Nmt1	0.0977851	0.968526	0.338484	0.644038
P97825	Hematological and neurological expressed 1 protein;Hematological and neurological expressed 1 protein, N-terminally processed	Hn1	-0.115028	-0.96635	0.339558	0.645738
Q9QZX7	Serine racemase	Srr	-0.0872855	-0.965007	0.340223	0.646658
Q9D0K2	Succinyl-CoA:3-ketoacid coenzyme A transferase 1, mitochondrial	Oxct1	-0.0700233	-0.961931	0.341747	0.649211
Q9D7X8	Gamma-glutamylcyclotransferase	Ggct	0.187333	0.960902	0.342258	0.649492
Q9JJZ2	Tubulin alpha-8 chain	Tuba8	-0.171631	-0.960953	0.342233	0.649492
Q7TMK9	Heterogeneous nuclear ribonucleoprotein Q	Syncrip	-0.0648456	-0.959509	0.342951	0.649919
Q8BL86	Metallo-beta-lactamase domain-containing protein 2	Mblac2	-0.177108	-0.959353	0.343028	0.649919
Q9CTY5	Calcium uptake protein 3, mitochondrial	Micu3	-0.123785	-0.959695	0.342858	0.649919
O08582	GTP-binding protein 1	Gtpbp1	-0.16982	-0.957214	0.344093	0.650414
O55026	Ectonucleoside triphosphate diphosphohydrolase 2	Entpd2	-0.135628	-0.956639	0.34438	0.650414
Q8R016	Bleomycin hydrolase	Blmh	0.104696	0.956756	0.344321	0.650414
Q8R1N4	NudC domain-containing protein 3	Nudcd3	0.257913	0.957077	0.344162	0.650414
Q99K51;Q3V0K9	Plastin-3	Pls3	-0.0756412	-0.95791	0.343746	0.650414
Q9Z0E0	Neurochondrin	Ncdn	-0.0797703	-0.957076	0.344162	0.650414
Q9ERB0	Synaptosomal-associated protein 29	Snap29	0.14309	0.955729	0.344834	0.650929
P35803	Neuronal membrane glycoprotein M6-b	Gpm6b	-0.110251	-0.955324	0.345037	0.650968
Q3TLI0	Trafficking protein particle complex subunit 10	Trappc10	-0.222628	-0.954412	0.345492	0.651484
P36916	Guanine nucleotide-binding protein-like 1	Gnl1	-0.0954895	-0.953617	0.345889	0.651546
P62334	26S protease regulatory subunit 10B	Psmc6	-0.0915309	-0.953901	0.345748	0.651546
Q5SSZ5	Tensin-3	Tns3	0.139098	0.952868	0.346264	0.65191
P55012	Solute carrier family 12 member 2	Slc12a2	0.184202	0.95072	0.347341	0.65207
P62305	Small nuclear ribonucleoprotein E	Snrpe	0.167788	0.951261	0.347069	0.65207
Q61656	Probable ATP-dependent RNA helicase DDX5	Ddx5	-0.0725551	-0.950516	0.347443	0.65207
Q8K2J0	1-phosphatidylinositol 4,5-bisphosphate phosphodiesterase delta-3	Plcd3	-0.24252	-0.951493	0.346953	0.65207
Q91YP0	L-2-hydroxyglutarate dehydrogenase, mitochondrial	L2hgdh	-0.139042	-0.951248	0.347076	0.65207
Q9QYB5	Gamma-adducin	Add3	0.0838556	0.951121	0.34714	0.65207
A6H630	Protein-glutamate O-methyltransferase	Armt1	-0.172785	-0.949955	0.347725	0.652257
P50544	Very long-chain specific acyl-CoA dehydrogenase, mitochondrial	Acadvl	-0.0901209	-0.948578	0.348416	0.652562
P97333	Neuropilin-1	Nrp1	0.11881	0.948326	0.348543	0.652562
P97785	GDNF family receptor alpha-1	Gfra1	-0.226015	-0.947818	0.348799	0.652562
Q9JJR8	Transmembrane protein 9B	Tmem9b	-0.200937	-0.949	0.348205	0.652562
Q9WV96	Mitochondrial import inner membrane translocase subunit Tim10 B	Timm10b	-0.165072	-0.948168	0.348622	0.652562
P14148	60S ribosomal protein L7	Rpl7	0.0953819	0.94553	0.349951	0.65267
P17751	Triosephosphate isomerase	Tpi1	-0.0741354	-0.946578	0.349423	0.65267
Q6PH08	ERC protein 2	Erc2	-0.119642	-0.94565	0.34989	0.65267
Q8BYI9	Tenascin-R	Tnr	-0.059096	-0.946603	0.34941	0.65267
Q8C570	mRNA export factor	Rae1	-0.185963	-0.946588	0.349418	0.65267
Q9DAS9	Guanine nucleotide-binding protein G(I)/G(S)/G(O) subunit gamma-12	Gng12	0.13234	0.945582	0.349924	0.65267
Q61151	Serine/threonine-protein phosphatase 2A 56 kDa regulatory subunit epsilon isoform	Ppp2r5e	-0.0730509	-0.944424	0.350509	0.65337
E9Q8T7		Dnah1	0.380088	0.943703	0.350873	0.653708
Q8BIQ5	Cleavage stimulation factor subunit 2	Cstf2	0.180244	0.942363	0.35155	0.653948
Q8VDK1	Nitrilase homolog 1	Nit1	0.148619	0.942664	0.351398	0.653948
Q9JK23	Proteasome assembly chaperone 1	Psmg1	-0.137454	-0.942548	0.351456	0.653948
O35375	Neuropilin-2	Nrp2	0.178576	0.940624	0.35243	0.654579
O70305	Ataxin-2	Atxn2	-0.180982	-0.9405	0.352493	0.654579
Q8C1Y8	Vacuolar fusion protein CCZ1 homolog	Ccz1	-0.169262	-0.940248	0.35262	0.654579
Q99K48	Non-POU domain-containing octamer-binding protein	Nono	0.090547	0.941141	0.352168	0.654579
Q9D892	Inosine triphosphate pyrophosphatase	Itpa	-0.117554	-0.939176	0.353163	0.655247
Q8VEE0	Ribulose-phosphate 3-epimerase	Rpe	0.157737	0.938289	0.353614	0.655743
Q6NZL0	Protein SOGA3	Soga3	-0.115649	-0.937108	0.354213	0.656515
P13634	Carbonic anhydrase 1	Ca1	0.322366	0.936409	0.354569	0.656833
Q9QXG2	Rab proteins geranylgeranyltransferase component A 1	Chm	0.149618	0.93551	0.355026	0.65734
P59326	YTH domain-containing family protein 1	Ythdf1	0.164024	0.933664	0.355966	0.657475
Q63829	COMM domain-containing protein 3	Commd3	0.241438	0.933585	0.356007	0.657475
Q8CCF0	U4/U6 small nuclear ribonucleoprotein Prp31	Prpf31	-0.163845	-0.933564	0.356017	0.657475
Q8K394	Inactive phospholipase C-like protein 2	Plcl2	-0.2735	-0.934951	0.355311	0.657475
Q9DC28;Q9JMK2	Casein kinase I isoform delta;Casein kinase I isoform epsilon	Csnk1d;Csnk1e	-0.137811	-0.93376	0.355917	0.657475
Q9CQK7	RWD domain-containing protein 1	Rwdd1	0.151204	0.932819	0.356397	0.657837
Q7TNR6	Immunoglobulin superfamily member 21	Igsf21	-0.159635	-0.931407	0.357118	0.658489
Q9DCX2	ATP synthase subunit d, mitochondrial	Atp5h	-0.0640525	-0.931755	0.35694	0.658489
Q62048	Astrocytic phosphoprotein PEA-15	Pea15	-0.103003	-0.930572	0.357545	0.658936
Q9D0F3	Protein ERGIC-53	Lman1	0.222288	0.929096	0.3583	0.659987
P58390	Small conductance calcium-activated potassium channel protein 2	Kcnn2	-0.2789	-0.928352	0.358681	0.660349
A2AQ25	Sickle tail protein	Skt	-0.311249	-0.926957	0.359396	0.661326
Q8BR63	Protein FAM177A1	Fam177a1	0.292513	0.92649	0.359636	0.661427
Q9R0I7	YLP motif-containing protein 1	Ylpm1	-0.108312	-0.926112	0.35983	0.661444
Q80WC7	Arf-GAP domain and FG repeat-containing protein 2	Agfg2	0.0850416	0.925742	0.36002	0.661453
Q62384	Zinc finger protein ZPR1	Zpr1	0.154588	0.925314	0.36024	0.661518
P32883	GTPase KRas;GTPase KRas, N-terminally processed	Kras	0.185792	0.924091	0.360868	0.662332
O08810	116 kDa U5 small nuclear ribonucleoprotein component	Eftud2	0.106706	0.92263	0.361621	0.662781
P11881	Inositol 1,4,5-trisphosphate receptor type 1	Itpr1	0.0959646	0.922625	0.361623	0.662781
Q99KB8	Hydroxyacylglutathione hydrolase, mitochondrial	Hagh	-0.103659	-0.922537	0.361668	0.662781
Q8BHL5	Engulfment and cell motility protein 2	Elmo2	-0.0759794	-0.921575	0.362164	0.66335
Q8BWR2	PITH domain-containing protein 1	Pithd1	0.110776	0.920708	0.362611	0.663829
Q3THW5;P0C0S6	Histone H2A.V;Histone H2A.Z	H2afv;H2afz	0.132303	0.919754	0.363104	0.663918
Q3U0V1	Far upstream element-binding protein 2	Khsrp	0.0580536	0.919289	0.363344	0.663918
Q8BVI5	Syntaxin-16	Stx16	-0.159494	-0.918818	0.363587	0.663918
Q8CH72	E3 ubiquitin-protein ligase TRIM32	Trim32	-0.173627	-0.919356	0.363309	0.663918
Q9D1F4	Proline-rich AKT1 substrate 1	Akt1s1	-0.147087	-0.918879	0.363556	0.663918
Q99KP3	Lambda-crystallin homolog	Cryl1	-0.178217	-0.917499	0.36427	0.664825
O55125	Protein NipSnap homolog 1	Nipsnap1	-0.119579	-0.916518	0.364777	0.665412
Q9DAK9	14 kDa phosphohistidine phosphatase	Phpt1	0.115509	0.915644	0.36523	0.665898
D3YXK2	Scaffold attachment factor B1	Safb	0.0828803	0.914035	0.366065	0.667081
P49070	Calcium signal-modulating cyclophilin ligand	Camlg	-0.120244	-0.910518	0.367894	0.668315
P56399	Ubiquitin carboxyl-terminal hydrolase 5	Usp5	-0.0428707	-0.910343	0.367985	0.668315
Q60790	Ras GTPase-activating protein 3	Rasa3	0.184607	0.910219	0.36805	0.668315
Q8C079	Striatin-interacting protein 1	Strip1	-0.15965	-0.911351	0.36746	0.668315
Q99L20		Gstt3	0.179308	0.910348	0.367982	0.668315
Q9CPR5	39S ribosomal protein L15, mitochondrial	Mrpl15	-0.165839	-0.912293	0.36697	0.668315
Q9D338	39S ribosomal protein L19, mitochondrial	Mrpl19	-0.343902	-0.910711	0.367793	0.668315
B1AXH1	NHS-like protein 2	Nhsl2	-0.187784	-0.909528	0.36841	0.66863
Q68FE6	Protein FAM65A	Fam65a	-0.123049	-0.908834	0.368772	0.668947
P25444	40S ribosomal protein S2	Rps2	-0.0776056	-0.904762	0.3709	0.670849
P63141;P16390;Q61923;Q61762;B2RQA1;P59053	Potassium voltage-gated channel subfamily A member 2;Potassium voltage-gated channel subfamily A member 3	Kcna2;Kcna3	-0.0784904	-0.904492	0.371041	0.670849
P97467	Peptidyl-glycine alpha-amidating monooxygenase;Peptidylglycine alpha-hydroxylating monooxygenase;Peptidyl-alpha-hydroxyglycine alpha-amidating lyase	Pam	0.149965	0.905833	0.370339	0.670849
Q80WG5	Volume-regulated anion channel subunit LRRC8A	Lrrc8a	-0.172697	-0.904891	0.370832	0.670849
Q8BU30	Isoleucine--tRNA ligase, cytoplasmic	Iars	0.108948	0.904318	0.371132	0.670849
Q9CQ26	STAM-binding protein	Stambp	-0.14356	-0.904713	0.370925	0.670849
Q9QZB1	Regulator of G-protein signaling 20	Rgs20	0.364162	0.905223	0.370658	0.670849
P14094	Sodium/potassium-transporting ATPase subunit beta-1	Atp1b1	-0.0615065	-0.902883	0.371884	0.671531
Q6PE13	Proline-rich transmembrane protein 3	Prrt3	-0.143058	-0.902887	0.371882	0.671531
Q9CQM5	Thioredoxin domain-containing protein 17	Txndc17	-0.086975	-0.901913	0.372393	0.67199
Q9R226	KH domain-containing, RNA-binding, signal transduction-associated protein 3	Khdrbs3	-0.117844	-0.901325	0.372702	0.67199
Q9Z0U1;Q9QXY1	Tight junction protein ZO-2	Tjp2	0.165891	0.90154	0.372589	0.67199
Q99KK2	N-acylneuraminate cytidylyltransferase	Cmas	-0.15844	-0.90039	0.373193	0.672199
Q9JII5	DAZ-associated protein 1	Dazap1	-0.135567	-0.900609	0.373078	0.672199
Q9D1T0;Q3URE9	Leucine-rich repeat and immunoglobulin-like domain-containing nogo receptor-interacting protein 1	Lingo1	-0.162902	-0.899592	0.373613	0.672616
O88712	C-terminal-binding protein 1	Ctbp1	-0.0893741	-0.897395	0.37477	0.674179
P32067	Lupus La protein homolog	Ssb	-0.152676	-0.896986	0.374985	0.674179
P62754	40S ribosomal protein S6	Rps6	-0.157852	-0.896871	0.375046	0.674179
O54865	Guanylate cyclase soluble subunit beta-1	Gucy1b3	-0.141745	-0.896276	0.37536	0.674404
Q8BJY1	26S proteasome non-ATPase regulatory subunit 5	Psmd5	-0.0961921	-0.894151	0.376482	0.675741
Q91VC7	Protein phosphatase 1 regulatory subunit 14A	Ppp1r14a	-0.314597	-0.894484	0.376306	0.675741
Q5SS00	DBF4-type zinc finger-containing protein 2 homolog	Zdbf2	0.26615	0.893218	0.376976	0.676289
O35435	Dihydroorotate dehydrogenase (quinone), mitochondrial	Dhodh	0.190473	0.892361	0.377429	0.676424
Q6NZJ6	Eukaryotic translation initiation factor 4 gamma 1	Eif4g1	-0.101766	-0.892436	0.377389	0.676424
Q922D8	C-1-tetrahydrofolate synthase, cytoplasmic;Methylenetetrahydrofolate dehydrogenase;Methenyltetrahydrofolate cyclohydrolase;Formyltetrahydrofolate synthetase;C-1-tetrahydrofolate synthase, cytoplasmic, N-terminally processed	Mthfd1	0.076301	0.892004	0.377618	0.676424
[truncated: 1,581 more rows]

## Sheet: Supplementary DataS2B_male
Supplementary DataS2B Analysis of differentially expressed proteins (DEP) in 5xFADvsWT male mouse
Protein.IDs	Protein.names	Gene.names	logFC	t	P.Value	adj.P.Val
P20060	Beta-hexosaminidase subunit beta	Hexb	1.51333	8.72913	7.01252e-11	2.50978e-07
P08226;Q8VHG0;CON__Q03247	Apolipoprotein E	Apoe	2.15572	8.27778	2.8517e-10	3.50954e-07
P12023	Amyloid beta A4 protein;N-APP;Soluble APP-alpha;Soluble APP-beta;C99;Beta-amyloid protein 42;Beta-amyloid protein 40;C83;P3(42);P3(40);C80;Gamma-secretase C-terminal fragment 59;Gamma-secretase C-terminal fragment 57;Gamma-secretase C-terminal fragment 50;C31	App	2.13236	8.26785	2.94178e-10	3.50954e-07
Q9R118	Serine protease HTRA1	Htra1	2.18133	7.97723	7.34543e-10	6.57232e-07
P17047	Lysosome-associated membrane glycoprotein 2	Lamp2	0.994103	7.46791	3.72315e-09	2.66503e-06
Q06890	Clusterin;Clusterin beta chain;Clusterin alpha chain	Clu	1.47889	6.77505	3.4972e-08	2.08608e-05
P03995;Q99M73;Q9Z2T6;Q6IMF0;CON__Q6KB66-1;CON__Q61726;CON__Q6NT21;CON__P78385;CON__P78386;CON__P19013;CON__P12035	Glial fibrillary acidic protein	Gfap	1.75951	6.39492	1.20785e-07	6.17555e-05
O35639	Annexin A3	Anxa3	2.00495	6.24087	1.99821e-07	8.9395e-05
P14106	Complement C1q subcomponent subunit B	C1qb	2.10486	6.16024	2.60089e-07	0.000103429
P18242	Cathepsin D	Ctsd	0.828484	6.06138	3.59328e-07	0.000128603
Q61233	Plastin-2	Lcp1	2.03491	5.93012	5.51886e-07	0.000179564
Q02105	Complement C1q subcomponent subunit C	C1qc	2.0219	5.75771	9.69301e-07	0.000289094
Q9CQW2	ADP-ribosylation factor-like protein 8B	Arl8b	0.646287	5.60608	1.58954e-06	0.000420329
Q9WUU7	Cathepsin Z	Ctsz	2.29727	5.5957	1.6442e-06	0.000420329
P98086	Complement C1q subcomponent subunit A	C1qa	1.95078	5.37465	3.37452e-06	0.000805162
O89051	Integral membrane protein 2B;BRI2, membrane form;BRI2 intracellular domain;BRI2C, soluble form;Bri23 peptide	Itm2b	1.12281	5.33571	3.82892e-06	0.000856481
P05555	Integrin alpha-M	Itgam	1.59647	5.13165	7.40913e-06	0.00154421
Q9Z2H5	Band 4.1-like protein 1	Epb41l1	-0.353122	-5.11705	7.76635e-06	0.00154421
Q91VK4	Integral membrane protein 2C;CT-BRI3	Itm2c	1.45208	5.04686	9.7365e-06	0.00174235
Q9ER58	Testican-2	Spock2	1.34149	5.05525	9.47702e-06	0.00174235
P34914	Bifunctional epoxide hydrolase 2;Cytosolic epoxide hydrolase 2;Lipid-phosphate phosphatase	Ephx2	0.514767	5.02778	1.03525e-05	0.00176437
Q62108	Disks large homolog 4	Dlg4	-0.323512	-4.95407	1.31173e-05	0.00213395
Q9DAW9	Calponin-3	Cnn3	0.791915	4.92776	1.42715e-05	0.00222077
Q61599	Rho GDP-dissociation inhibitor 2	Arhgdib	0.994897	4.88315	1.6462e-05	0.0024549
O88844	Isocitrate dehydrogenase [NADP] cytoplasmic	Idh1	0.396908	4.83448	1.92312e-05	0.00271518
P29416	Beta-hexosaminidase subunit alpha	Hexa	1.36785	4.82654	1.97247e-05	0.00271518
P52760	Ribonuclease UK114	Hrsp12	0.73415	4.67144	3.22989e-05	0.0042814
Q99L04	Dehydrogenase/reductase SDR family member 1	Dhrs1	0.862065	4.65735	3.37735e-05	0.00431697
O08709	Peroxiredoxin-6	Prdx6	0.554192	4.58838	4.19993e-05	0.0051833
P21460	Cystatin-C	Cst3	0.555151	4.57754	4.34596e-05	0.00518473
P26041	Moesin	Msn	1.01193	4.56097	4.57895e-05	0.00528647
Q8VCC9	Spondin-1	Spon1	0.726933	4.5246	5.13421e-05	0.00574229
Q9QYS2	Metabotropic glutamate receptor 3	Grm3	-0.44571	-4.46831	6.12633e-05	0.00664429
P19096	Fatty acid synthase;[Acyl-carrier-protein] S-acetyltransferase;[Acyl-carrier-protein] S-malonyltransferase;3-oxoacyl-[acyl-carrier-protein] synthase;3-oxoacyl-[acyl-carrier-protein] reductase;3-hydroxyacyl-[acyl-carrier-protein] dehydratase;Enoyl-[acyl-carrier-protein] reductase;Oleoyl-[acyl-carrier-protein] hydrolase	Fasn	0.334071	4.41455	7.24841e-05	0.00763002
Q61768	Kinesin-1 heavy chain	Kif5b	0.618221	4.39584	7.68414e-05	0.00785758
Q641P0	Actin-related protein 3B	Actr3b	-0.337038	-4.38506	7.94689e-05	0.00790054
P63318	Protein kinase C gamma type	Prkcg	-0.254092	-4.21053	0.000136499	0.0130927
Q3UHL1	CaM kinase-like vesicle-associated protein	Camkv	-0.288998	-4.19617	0.00014267	0.0130927
Q91W86	Vacuolar protein sorting-associated protein 11 homolog	Vps11	0.538525	4.20382	0.00013935	0.0130927
Q9QXS6	Drebrin	Dbn1	-0.222486	-4.11363	0.000183785	0.0164441
F6SEU4	Ras/Rap GTPase-activating protein SynGAP	Syngap1	-0.240646	-4.09507	0.000194513	0.0169796
Q91Y86	Mitogen-activated protein kinase 8	Mapk8	0.620089	4.08409	0.000201139	0.0171399
O09044	Synaptosomal-associated protein 23	Snap23	0.928536	4.06916	0.00021051	0.0175213
P01029;CON__P01030	Complement C4-B;Complement C4 beta chain;Complement C4 alpha chain;C4a anaphylatoxin;Complement C4 gamma chain	C4b	2.17039	4.05303	0.000221109	0.0179852
Q7TME0	Lipid phosphate phosphatase-related protein type 4	Lppr4	-0.305088	-4.04321	0.000227808	0.0181183
P42227	Signal transducer and activator of transcription 3	Stat3	0.74638	4.0308	0.000236568	0.018406
Q8VDM6	Heterogeneous nuclear ribonucleoprotein U-like protein 1	Hnrnpul1	0.604831	4.02101	0.000243704	0.0185578
P01887	Beta-2-microglobulin	B2m	3.26807	3.99931	0.000260281	0.0194
Q9CQ22	Ragulator complex protein LAMTOR1	Lamtor1	0.750647	3.99262	0.000265604	0.0194
O54901	OX-2 membrane glycoprotein	Cd200	-0.382315	-3.95688	0.000295917	0.0211817
P97372	Proteasome activator complex subunit 2	Psme2	1.45922	3.94336	0.000308228	0.0216303
Q8BPN8	DmX-like protein 2	Dmxl2	-0.183205	-3.92338	0.00032735	0.0225305
Q8C729	Protein FAM126B	Fam126b	-0.351113	-3.89612	0.000355302	0.0239929
P20152;P15331	Vimentin	Vim	1.18152	3.85172	0.000405845	0.0259075
P62843	40S ribosomal protein S15	Rps15	0.68363	3.86267	0.000392776	0.0259075
Q8K0T0	Reticulon-1	Rtn1	-0.256073	-3.84619	0.000412608	0.0259075
Q9CZX7	Type 2 phosphatidylinositol 4,5-bisphosphate 4-phosphatase	Tmem55a	0.951019	3.85659	0.000399982	0.0259075
Q60648	Ganglioside GM2 activator	Gm2a	0.773366	3.78351	0.000497312	0.0296647
Q63912	Oligodendrocyte-myelin glycoprotein	Omg	-0.416956	-3.78593	0.000493751	0.0296647
Q91YI0	Argininosuccinate lyase	Asl	0.680513	3.7845	0.000495847	0.0296647
P26039	Talin-1	Tln1	0.587495	3.77142	0.000515484	0.0297567
Q8C9S4	Coiled-coil domain-containing protein 186	Ccdc186	-0.610583	-3.77419	0.00051126	0.0297567
O70443	Guanine nucleotide-binding protein G(z) subunit alpha	Gnaz	-0.262432	-3.71756	0.000604516	0.0338057
Q60766	Immunity-related GTPase family M protein 1	Irgm1	2.71996	3.71796	0.000603802	0.0338057
Q8BYI9	Tenascin-R	Tnr	-0.231593	-3.70966	0.000618749	0.0340693
Q9EQG7	Ectonucleotide pyrophosphatase/phosphodiesterase family member 5	Enpp5	0.841973	3.70312	0.000630791	0.0342061
B9EJA2	Cortactin-binding protein 2	Cttnbp2	-0.257408	-3.67593	0.000683302	0.0348326
P14069	Protein S100-A6	S100a6	1.21895	3.67611	0.000682956	0.0348326
Q8VEH3	ADP-ribosylation factor-like protein 8A	Arl8a	0.535815	3.67211	0.000691006	0.0348326
Q922R8	Protein disulfide-isomerase A6	Pdia6	0.339865	3.68444	0.000666434	0.0348326
Q9Z268	RasGAP-activating-like protein 1	Rasal1	-0.326607	-3.68855	0.000658437	0.0348326
Q9QWI6	SRC kinase signaling inhibitor 1	Srcin1	-0.2404	-3.64739	0.000742961	0.0369313
P61161	Actin-related protein 2	Actr2	-0.252392	-3.59338	0.000869828	0.0426454
O88746	Target of Myb protein 1	Tom1	0.436846	3.57504	0.000917466	0.0429399
P48036	Annexin A5	Anxa5	0.431803	3.57531	0.000916733	0.0429399
Q61016	Guanine nucleotide-binding protein G(I)/G(S)/G(O) subunit gamma-7	Gng7	-0.458238	-3.57266	0.000923826	0.0429399
Q9R1Q8	Transgelin-3	Tagln3	-0.351645	-3.57539	0.000916531	0.0429399
Q810U3	Neurofascin	Nfasc	-0.240441	-3.55481	0.000972898	0.0446411
Q9JKY5	Huntingtin-interacting protein 1-related protein	Hip1r	0.912935	3.51933	0.00107802	0.0488384
P07091	Protein S100-A4	S100a4	2.23126	3.51242	0.00109969	0.0491975
P11835	Integrin beta-2	Itgb2	1.03801	3.49736	0.00114847	0.0495226
Q61644	Protein kinase C and casein kinase substrate in neurons protein 1	Pacsin1	-0.233088	-3.50204	0.0011331	0.0495226
Q68FD5	Clathrin heavy chain 1	Cltc	-0.175362	-3.50034	0.00113865	0.0495226
Q8K0S0	Phytanoyl-CoA hydroxylase-interacting protein	Phyhip	-0.246344	-3.48376	0.00119427	0.0508844
P24452	Macrophage-capping protein	Capg	0.854951	3.46192	0.00127148	0.0523059
Q8R191	Synaptogyrin-3	Syngr3	-0.325329	-3.46569	0.00125781	0.0523059
Q9WV32	Actin-related protein 2/3 complex subunit 1B	Arpc1b	1.00746	3.46471	0.00126137	0.0523059
Q8BI08	Protein MAL2	Mal2	-0.469176	-3.45485	0.00129747	0.0527689
P97371	Proteasome activator complex subunit 1	Psme1	0.610989	3.44516	0.00133397	0.0534942
Q8BZW8	NHL repeat-containing protein 2	Nhlrc2	0.517171	3.44223	0.0013452	0.0534942
P27773	Protein disulfide-isomerase A3	Pdia3	0.25796	3.40569	0.00149294	0.0541274
P47867	Secretogranin-3	Scg3	0.885031	3.40467	0.00149724	0.0541274
P53810	Phosphatidylinositol transfer protein alpha isoform	Pitpna	-0.23138	-3.42151	0.00142713	0.0541274
Q8BLQ9	Cell adhesion molecule 2	Cadm2	-0.255308	-3.4083	0.00148189	0.0541274
Q8C0T5	Signal-induced proliferation-associated 1-like protein 1	Sipa1l1	-0.496342	-3.40617	0.00149088	0.0541274
Q8K596		Slc8a2	-0.273462	-3.41923	0.00143644	0.0541274
Q91V61	Sideroflexin-3	Sfxn3	-0.272338	-3.41257	0.00146397	0.0541274
Q9D1L9	Ragulator complex protein LAMTOR5	Lamtor5	0.716576	3.41638	0.00144815	0.0541274
Q9Z1Q5	Chloride intracellular channel protein 1	Clic1	0.68207	3.41137	0.00146899	0.0541274
Q8BP48	Methionine aminopeptidase 1	Metap1	-0.483141	-3.39451	0.00154115	0.0551577
Q920E5	Farnesyl pyrophosphate synthase	Fdps	0.599388	3.37318	0.00163728	0.0574491
Q920P3	BMP/retinoic acid-inducible neural-specific protein 1	Brinp1	-0.58156	-3.37503	0.00162874	0.0574491
Q6P9K8;Q8VHK1	Caskin-1	Caskin1	-0.23561	-3.36457	0.00167766	0.0582948
Q3V3V9	Leucine-rich repeat-containing protein 16C	Rltpr	-0.300286	-3.34073	0.00179458	0.0617578
G5E829	Plasma membrane calcium-transporting ATPase 1	Atp2b1	-0.174485	-3.2911	0.00206334	0.0631227
O88998	Noelin	Olfm1	-0.334619	-3.30869	0.00196396	0.0631227
P08003	Protein disulfide-isomerase A4	Pdia4	0.394778	3.31271	0.00194189	0.0631227
P15508	Spectrin beta chain, erythrocytic	Sptb	-0.249703	-3.29345	0.00204979	0.0631227
P28798	Granulins;Acrogranin;Granulin-1;Granulin-2;Granulin-3;Granulin-4;Granulin-5;Granulin-6;Granulin-7	Grn	0.931833	3.29423	0.00204532	0.0631227
P49615;Q14AX6;Q69ZA1;P11440;P97377;Q99J95;Q3V3A1;Q80YP0;Q64261;P30285	Cyclin-dependent-like kinase 5	Cdk5	-0.26337	-3.32008	0.00190211	0.0631227
P51855	Glutathione synthetase	Gss	-0.65409	-3.30294	0.00199594	0.0631227
Q3UVX5;REV__P0DM65	Metabotropic glutamate receptor 5	Grm5	-0.277254	-3.29106	0.00206352	0.0631227
Q61207	Prosaposin	Psap	0.340984	3.29982	0.00201347	0.0631227
Q61361	Brevican core protein	Bcan	-0.255305	-3.32742	0.00186321	0.0631227
Q80TE7	Leucine-rich repeat-containing protein 7	Lrrc7	-0.246399	-3.29928	0.00201652	0.0631227
Q8BZJ7	DCN1-like protein 2	Dcun1d2	-0.463598	-3.30109	0.00200631	0.0631227
Q9ER00	Syntaxin-12	Stx12	0.315636	3.29634	0.00203321	0.0631227
Q9WVQ5	Methylthioribulose-1-phosphate dehydratase	Apip	0.691468	3.28236	0.00211446	0.0641327
Q9JKR6	Hypoxia up-regulated protein 1	Hyou1	0.219388	3.27574	0.00215396	0.064242
Q9WUC3	Lymphocyte antigen 6H	Ly6h	-0.429825	-3.27611	0.00215173	0.064242
Q922D4	Serine/threonine-protein phosphatase 6 regulatory subunit 3	Ppp6r3	1.08532	3.25758	0.00226601	0.0670252
P62881	Guanine nucleotide-binding protein subunit beta-5	Gnb5	-0.244014	-3.25314	0.00229426	0.0673046
Q3UIU2	NADH dehydrogenase [ubiquinone] 1 beta subcomplex subunit 6	Ndufb6	-0.42623	-3.24256	0.0023629	0.0687546
Q8VHW2	Voltage-dependent calcium channel gamma-8 subunit	Cacng8	-0.275324	-3.23531	0.00241103	0.0690327
Q9CXZ1	NADH dehydrogenase [ubiquinone] iron-sulfur protein 4, mitochondrial	Ndufs4	-0.267313	-3.23655	0.00240271	0.0690327
Q9DB72	BTB/POZ domain-containing protein 17	Btbd17	-0.50766	-3.2313	0.00243802	0.0692514
P15379	CD44 antigen	Cd44	0.841038	3.2218	0.00250318	0.0694486
Q9D711	Pirin	Pir	0.96417	3.22271	0.00249688	0.0694486
Q9JLM8	Serine/threonine-protein kinase DCLK1	Dclk1	-0.204311	-3.22603	0.00247395	0.0694486
P62761	Visinin-like protein 1	Vsnl1	-0.226728	-3.21408	0.0025574	0.0704071
Q9QYB8	Beta-adducin	Add2	-0.208225	-3.21049	0.00258294	0.0705675
D3YZU1	SH3 and multiple ankyrin repeat domains protein 1	Shank1	-0.237845	-3.19346	0.00270758	0.0709441
P23819	Glutamate receptor 2	Gria2	-0.178168	-3.19556	0.00269191	0.0709441
P35802	Neuronal membrane glycoprotein M6-a	Gpm6a	-0.403894	-3.20312	0.00263618	0.0709441
P70414	Sodium/calcium exchanger 1	Slc8a1	-0.374055	-3.1985	0.0026701	0.0709441
Q80XN0	D-beta-hydroxybutyrate dehydrogenase, mitochondrial	Bdh1	-0.364966	-3.20302	0.00263691	0.0709441
Q91V92	ATP-citrate synthase	Acly	0.239069	3.18975	0.00273548	0.0709441
Q91ZR1	Ras-related protein Rab-4B	Rab4b	0.4151	3.19058	0.0027292	0.0709441
Q8K400	Syntaxin-binding protein 5	Stxbp5	-0.440783	-3.18624	0.00276215	0.0711203
P27601	Guanine nucleotide-binding protein subunit alpha-13	Gna13	0.245788	3.16723	0.00291071	0.0717087
P68181	cAMP-dependent protein kinase catalytic subunit beta	Prkacb	-0.23468	-3.16462	0.00293172	0.0717087
Q61490	CD166 antigen	Alcam	-0.243853	-3.15877	0.00297926	0.0717087
Q80X50	Ubiquitin-associated protein 2-like	Ubap2l	-0.233477	-3.16821	0.00290289	0.0717087
Q8C419	Probable G-protein coupled receptor 158	Gpr158	-0.278734	-3.16617	0.00291926	0.0717087
Q8R366	Immunoglobulin superfamily member 8	Igsf8	-0.318966	-3.16587	0.00292168	0.0717087
Q8VDN2	Sodium/potassium-transporting ATPase subunit alpha-1	Atp1a1	-0.180789	-3.15803	0.00298536	0.0717087
Q9CWS0	N(G),N(G)-dimethylarginine dimethylaminohydrolase 1	Ddah1	0.179714	3.15972	0.00297155	0.0717087
Q9Z0P4	Paralemmin-1	Palm	-0.218089	-3.17592	0.00284187	0.0717087
Q9Z2Y3	Homer protein homolog 1	Homer1	-0.218119	-3.17078	0.00288244	0.0717087
O55234	Proteasome subunit beta type-5	Psmb5	-0.405465	-3.15547	0.00300646	0.0717342
A2AJA9	Uncharacterized protein C9orf172 homolog	Gm996	-0.464882	-3.14702	0.00307704	0.0719787
P01831	Thy-1 membrane glycoprotein	Thy1	-0.258269	-3.14793	0.00306934	0.0719787
Q99KX1	Myeloid leukemia factor 2	Mlf2	-0.305006	-3.14954	0.0030558	0.0719787
P29533	Vascular cell adhesion protein 1	Vcam1	0.467507	3.13974	0.00313911	0.0729536
P57759	Endoplasmic reticulum resident protein 29	Erp29	0.226423	3.12769	0.00324443	0.0745455
Q4ACU6	SH3 and multiple ankyrin repeat domains protein 3	Shank3	-0.226732	-3.12715	0.00324926	0.0745455
Q9JKF1	Ras GTPase-activating-like protein IQGAP1	Iqgap1	0.426612	3.11528	0.00335639	0.0765128
O88291	DBIRD complex subunit ZNF326	Znf326	0.492487	3.10618	0.00344086	0.0770008
O89017	Legumain	Lgmn	0.528962	3.10602	0.00344234	0.0770008
Q6GQS1	Calcium-binding mitochondrial carrier protein SCaMC-3	Slc25a23	-0.571247	-3.10697	0.00343343	0.0770008
P10493	Nidogen-1	Nid1	0.525278	3.10322	0.00346873	0.0771092
P32037	Solute carrier family 2, facilitated glucose transporter member 3	Slc2a3	-0.227071	-3.09489	0.00354833	0.0783918
Q64514	Tripeptidyl-peptidase 2	Tpp2	-0.254132	-3.09148	0.0035815	0.0786392
Q9DBG3	AP-2 complex subunit beta	Ap2b1	-0.142771	-3.08748	0.00362063	0.0790136
P14824	Annexin A6	Anxa6	0.204657	3.07657	0.00372964	0.0808993
Q9Z1X4	Interleukin enhancer-binding factor 3	Ilf3	-0.399836	-3.0743	0.00375265	0.080908
Q8BW75	Amine oxidase [flavin-containing] B	Maob	-0.317813	-3.07208	0.00377529	0.0809087
Q8CHP8	Phosphoglycolate phosphatase	Pgp	-0.274717	-3.06873	0.00380982	0.0810086
Q8VHK5	Membrane protein MLC1	Mlc1	0.381702	3.06506	0.00384785	0.0810086
Q9R0N7	Synaptotagmin-7	Syt7	-0.256129	-3.06527	0.00384567	0.0810086
P62960;Q9JKB3;Q9Z2C8	Nuclease-sensitive element-binding protein 1	Ybx1	0.638126	3.04499	0.00406265	0.0849277
Q8CGM1	Brain-specific angiogenesis inhibitor 2	Bai2	-0.380519	-3.04243	0.00409081	0.0849277
Q8K0U4	Heat shock 70 kDa protein 12A	Hspa12a	-0.250782	-3.04113	0.00410519	0.0849277
Q8K4X7	1-acyl-sn-glycerol-3-phosphate acyltransferase delta	Agpat4	-0.658835	-3.03567	0.00416614	0.0856931
P63213	Guanine nucleotide-binding protein G(I)/G(S)/G(O) subunit gamma-2	Gng2	-0.22484	-3.03153	0.00421301	0.086162
O88653	Ragulator complex protein LAMTOR3	Lamtor3	0.645739	3.028	0.00425327	0.0864913
A2RT62	F-box/LRR-repeat protein 16	Fbxl16	-0.243247	-3.01336	0.00442418	0.086781
O35874	Neutral amino acid transporter A	Slc1a4	0.323464	3.01564	0.00439714	0.086781
P31324	cAMP-dependent protein kinase type II-beta regulatory subunit	Prkar2b	-0.232806	-3.02218	0.00432044	0.086781
Q3UHD9	Arf-GAP with GTPase, ANK repeat and PH domain-containing protein 2	Agap2	-0.213329	-3.01226	0.00443725	0.086781
Q6ZQ18	Protein EFR3 homolog B	Efr3b	-0.357977	-3.01536	0.00440041	0.086781
Q99LX0	Protein deglycase DJ-1	Park7	-0.24881	-3.01471	0.0044081	0.086781
Q9WV92	Band 4.1-like protein 3;Band 4.1-like protein 3, N-terminally processed	Epb41l3	-0.188664	-3.0175	0.00437518	0.086781
P50396	Rab GDP dissociation inhibitor alpha	Gdi1	-0.14059	-3.00287	0.00455062	0.0885146
Q99JY9	Actin-related protein 3	Actr3	-0.19493	-2.99825	0.00460734	0.0891333
Q9DC69	NADH dehydrogenase [ubiquinone] 1 alpha subcomplex subunit 9, mitochondrial	Ndufa9	-0.216403	-2.99338	0.00466788	0.0898191
P21279	Guanine nucleotide-binding protein G(q) subunit alpha	Gnaq	-0.202562	-2.98713	0.00474661	0.0908455
O35098	Dihydropyrimidinase-related protein 4	Dpysl4	-0.171488	-2.97772	0.00486755	0.0921745
O88951	Protein lin-7 homolog B	Lin7b	-0.364472	-2.97873	0.00485448	0.0921745
Q7SIG6	Arf-GAP with SH3 domain, ANK repeat and PH domain-containing protein 2	Asap2	-0.640953	-2.96689	0.00501046	0.0943812
Q8CJH3;Q9QY40	Plexin-B1	Plxnb1	0.432298	2.95611	0.00515638	0.0966214
Q99K46	Ubiquitin carboxyl-terminal hydrolase 11	Usp11	-0.382285	-2.95372	0.0051894	0.0967336
Q9JMH6;Q9JLT4	Thioredoxin reductase 1, cytoplasmic	Txnrd1	0.37251	2.94838	0.00526357	0.0976078
Q3UGY8	Brefeldin A-inhibited guanine nucleotide-exchange protein 3	Arfgef3	0.646437	2.94557	0.00530306	0.0978332
Q9Z0V2	Potassium voltage-gated channel subfamily D member 2	Kcnd2	-0.339884	-2.93615	0.00543739	0.0997971
Q9D1X0	Nucleolar protein 3	Nol3	0.266511	2.92806	0.00555528	0.101441
P18872	Guanine nucleotide-binding protein G(o) subunit alpha	Gnao1	-0.183002	-2.92409	0.00561409	0.101994
Q8R3V5	Endophilin-B2	Sh3glb2	-0.19811	-2.9205	0.00566771	0.102448
P57746	V-type proton ATPase subunit D	Atp6v1d	-0.191879	-2.89613	0.00604446	0.107095
P63216	Guanine nucleotide-binding protein G(I)/G(S)/G(O) subunit gamma-3	Gng3	-0.355591	-2.89882	0.00600179	0.107095
Q61753	D-3-phosphoglycerate dehydrogenase	Phgdh	-0.227803	-2.90096	0.0059679	0.107095
Q921I1	Serotransferrin	Tf	0.406182	2.89718	0.00602771	0.107095
P29351	Tyrosine-protein phosphatase non-receptor type 6	Ptpn6	0.818362	2.88762	0.00618144	0.108886
Q9DC07	LIM zinc-binding domain-containing Nebulette	Nebl	-0.249846	-2.88609	0.0062064	0.108886
Q8R071	Inositol-trisphosphate 3-kinase A	Itpka	-0.348486	-2.8798	0.00630999	0.110163
O08759	Ubiquitin-protein ligase E3A	Ube3a	-0.322591	-2.87615	0.00637071	0.110683
Q3UHJ0;Q91Z96	AP2-associated protein kinase 1	Aak1	-0.180859	-2.87325	0.00641942	0.110853
Q9DB73	NADH-cytochrome b5 reductase 1	Cyb5r1	0.273206	2.87189	0.0064424	0.110853
Q9JJI8	60S ribosomal protein L38	Rpl38	0.306337	2.86583	0.00654557	0.112089
Q99PJ0	Neurotrimin	Ntm	-0.237254	-2.86037	0.00663981	0.113161
Q920I9	WD repeat-containing protein 7	Wdr7	-0.186799	-2.85298	0.00676953	0.114825
P55264	Adenosine kinase	Adk	0.22624	2.84376	0.0069346	0.11707
P46935	E3 ubiquitin-protein ligase NEDD4	Nedd4	0.228814	2.83275	0.00713674	0.119917
P09103	Protein disulfide-isomerase	P4hb	0.231953	2.828	0.00722554	0.120842
B1AWN6;A2ASI5;A2APX8;Q62205;Q9JJV9;Q6QIY3	Sodium channel protein	Scn2a1	-0.265628	-2.8227	0.00732587	0.12195
Q6IRU5	Clathrin light chain B	Cltb	-0.291163	-2.81764	0.00742305	0.122996
Q921L3	Transmembrane and coiled-coil domain-containing protein 1	Tmco1	0.52772	2.80496	0.00767138	0.126525
P29788	Vitronectin	Vtn	1.09865	2.80011	0.00776837	0.127537
Q8CC86	Nicotinate phosphoribosyltransferase	Naprt	0.510801	2.79823	0.00780636	0.127575
P48774	Glutathione S-transferase Mu 5	Gstm5	-0.239792	-2.78826	0.00801034	0.130314
Q9CYT6	Adenylyl cyclase-associated protein 2	Cap2	-0.164659	-2.78478	0.00808257	0.130894
O35683	NADH dehydrogenase [ubiquinone] 1 alpha subcomplex subunit 1	Ndufa1	-0.468357	-2.774	0.00831058	0.131019
P13020;CON__Q3SX14	Gelsolin	Gsn	0.32348	2.77185	0.00835693	0.131019
P35762	CD81 antigen	Cd81	-0.324729	-2.76573	0.00848956	0.131019
P52480	Pyruvate kinase PKM	Pkm	0.17126	2.76558	0.00849302	0.131019
Q05793	Basement membrane-specific heparan sulfate proteoglycan core protein;Endorepellin;LG3 peptide	Hspg2	-0.625969	-2.77052	0.00838557	0.131019
Q62418	Drebrin-like protein	Dbnl	-0.205195	-2.77587	0.00827068	0.131019
Q6WQJ1	Sn1-specific diacylglycerol lipase alpha	Dagla	-0.408982	-2.77896	0.00820499	0.131019
Q91WS0	CDGSH iron-sulfur domain-containing protein 1	Cisd1	-0.224462	-2.77536	0.00828162	0.131019
Q921M7	Protein FAM49B	Fam49b	-0.147668	-2.77577	0.00827281	0.131019
Q9CPW0	Contactin-associated protein-like 2	Cntnap2	-0.223133	-2.77604	0.00826704	0.131019
Q9EPL2	Calsyntenin-1;Soluble Alc-alpha;CTF1-alpha	Clstn1	0.461658	2.76601	0.00848351	0.131019
P68404	Protein kinase C beta type	Prkcb	-0.208626	-2.75909	0.00863579	0.132083
Q3ULJ0	Glycerol-3-phosphate dehydrogenase 1-like protein	Gpd1l	-0.228906	-2.75967	0.00862296	0.132083
Q9Z1W9	STE20/SPS1-related proline-alanine-rich protein kinase	Stk39	-0.300538	-2.75693	0.00868405	0.132256
O88384	Vesicle transport through interaction with t-SNAREs homolog 1B	Vti1b	0.429349	2.73678	0.00914468	0.138096
Q8BKX1	Brain-specific angiogenesis inhibitor 1-associated protein 2	Baiap2	-0.177324	-2.73833	0.00910844	0.138096
P11798	Calcium/calmodulin-dependent protein kinase type II subunit alpha	Camk2a	-0.219307	-2.72776	0.00935793	0.13955
Q8K212	Phosphofurin acidic cluster sorting protein 1	Pacs1	-0.203273	-2.73061	0.00929021	0.13955
Q99LY9	NADH dehydrogenase [ubiquinone] iron-sulfur protein 5;NADH dehydrogenase [ubiquinone] iron-sulfur protein 5, N-terminally processed	Ndufs5	-0.168882	-2.72912	0.00932551	0.13955
O35526	Syntaxin-1A	Stx1a	-0.2881	-2.72231	0.00948924	0.140339
Q9CZW4	Long-chain-fatty-acid--CoA ligase 3	Acsl3	-0.227194	-2.72317	0.00946842	0.140339
Q8C8T8	Pre-rRNA-processing protein TSR2 homolog	Tsr2	-0.453543	-2.71119	0.00976213	0.143781
P16045	Galectin-1	Lgals1	0.473404	2.70857	0.00982763	0.144152
O70309	Integrin beta-5	Itgb5	0.77574	2.70534	0.00990864	0.144747
P05063	Fructose-bisphosphate aldolase C	Aldoc	0.187647	2.7021	0.00999071	0.144764
Q61290	Voltage-dependent R-type calcium channel subunit alpha-1E	Cacna1e	-0.46775	-2.70322	0.00996216	0.144764
O35454	Chloride transport protein 6	Clcn6	0.748184	2.69993	0.010046	0.144899
Q62420	Endophilin-A1	Sh3gl2	-0.156408	-2.69856	0.010081	0.144899
P01899;P01897;P01896;P01898	H-2 class I histocompatibility antigen, D-B alpha chain;H-2 class I histocompatibility antigen, L-D alpha chain;H-2 class I histocompatibility antigen, alpha chain	H2-D1;H2-L	2.00839	2.69636	0.0101374	0.145128
Q80TS3	Latrophilin-3	Lphn3	-0.711391	-2.6885	0.0103417	0.146877
Q9JKV5	Secretory carrier-associated membrane protein 4	Scamp4	-0.374676	-2.68939	0.0103184	0.146877
P26231	Catenin alpha-1	Ctnna1	0.593727	2.68352	0.0104732	0.146995
P49722	Proteasome subunit alpha type-2	Psma2	0.249227	2.68427	0.0104532	0.146995
Q3UMB5	Smith-Magenis syndrome chromosomal region candidate gene 8 protein homolog	Smcr8	-0.347189	-2.68595	0.0104088	0.146995
P97300	Neuroplastin	Nptn	-0.218873	-2.67837	0.0106106	0.148341
P51150	Ras-related protein Rab-7a	Rab7a	0.167047	2.66953	0.0108505	0.151105
P28663	Beta-soluble NSF attachment protein	Napb	-0.159697	-2.66179	0.0110648	0.153491
Q61205	Platelet-activating factor acetylhydrolase IB subunit gamma	Pafah1b3	0.46232	2.65876	0.0111495	0.153984
Q99LD8	N(G),N(G)-dimethylarginine dimethylaminohydrolase 2	Ddah2	0.333294	2.65745	0.0111863	0.153984
P43275	Histone H1.1	Hist1h1a	0.431618	2.65098	0.0113702	0.155915
Q91YT0	NADH dehydrogenase [ubiquinone] flavoprotein 1, mitochondrial	Ndufv1	-0.162226	-2.64942	0.0114151	0.155933
Q5RJI5	Serine/threonine-protein kinase BRSK1	Brsk1	-0.378871	-2.64545	0.0115295	0.156897
Q9ESN9	C-Jun-amino-terminal kinase-interacting protein 3	Mapk8ip3	-0.419177	-2.62943	0.0120025	0.162716
E9PUL5	Proline-rich transmembrane protein 2	Prrt2	-0.333312	-2.62714	0.0120719	0.163038
Q68ED7	CREB-regulated transcription coactivator 1	Crtc1	-0.402858	-2.61903	0.0123193	0.163906
Q68FL6	Methionine--tRNA ligase, cytoplasmic	Mars	0.302967	2.62015	0.0122849	0.163906
Q9CPY7	Cytosol aminopeptidase	Lap3	0.353089	2.62095	0.0122604	0.163906
Q9Z160	Conserved oligomeric Golgi complex subunit 1	Cog1	0.517355	2.61991	0.0122922	0.163906
P63137	Gamma-aminobutyric acid receptor subunit beta-2	Gabrb2	-0.277735	-2.6125	0.012522	0.165374
Q8K2T1	NmrA-like family domain-containing protein 1	Nmral1	-0.472297	-2.61294	0.0125084	0.165374
O08576	RUN domain-containing protein 3A	Rundc3a	0.664634	2.60916	0.012627	0.166147
Q91WD5	NADH dehydrogenase [ubiquinone] iron-sulfur protein 2, mitochondrial	Ndufs2	-0.152073	-2.60323	0.012815	0.168003
P60487	Pyridoxal phosphate phosphatase	Pdxp	-0.187311	-2.59969	0.0129286	0.168295
P97797	Tyrosine-protein phosphatase non-receptor type substrate 1	Sirpa	-0.268751	-2.59938	0.0129385	0.168295
Q9R0H0	Peroxisomal acyl-coenzyme A oxidase 1	Acox1	0.381625	2.59815	0.0129783	0.168295
Q9D5V5	Cullin-5	Cul5	-0.249182	-2.59519	0.0130744	0.168929
Q9CPW2	Adrenodoxin-like protein, mitochondrial	Fdx1l	-0.903031	-2.59081	0.0132175	0.170164
Q8VHL1	Histone-lysine N-methyltransferase SETD7	Setd7	-0.256371	-2.58671	0.013353	0.171292
Q9JLV6	Bifunctional polynucleotide phosphatase/kinase;Polynucleotide 3-phosphatase;Polynucleotide 5-hydroxyl-kinase	Pnkp	0.515772	2.58294	0.0134786	0.172286
O88643	Serine/threonine-protein kinase PAK 1	Pak1	-0.172712	-2.57552	0.0137289	0.173982
Q8CAY6	Acetyl-CoA acetyltransferase, cytosolic	Acat2	0.332699	2.57581	0.013719	0.173982
Q9D1T0;Q3URE9	Leucine-rich repeat and immunoglobulin-like domain-containing nogo receptor-interacting protein 1	Lingo1	-0.466237	-2.57469	0.0137572	0.173982
P37040	NADPH--cytochrome P450 reductase	Por	0.267589	2.5721	0.0138457	0.174485
Q80TJ1	Calcium-dependent secretion activator 1	Cadps	-0.16847	-2.56538	0.0140782	0.176174
Q8BFR4	N-acetylglucosamine-6-sulfatase	Gns	0.445592	2.56615	0.0140512	0.176174
Q9Z1G3	V-type proton ATPase subunit C 1	Atp6v1c1	-0.146451	-2.5616	0.0142104	0.177209
P51830	Adenylate cyclase type 9	Adcy9	-0.220763	-2.55828	0.0143273	0.178046
P63001;P60764;Q05144	Ras-related C3 botulinum toxin substrate 1;Ras-related C3 botulinum toxin substrate 3	Rac1;Rac3	-0.182688	-2.55347	0.0144987	0.178319
P70441	Na(+)/H(+) exchange regulatory cofactor NHE-RF1	Slc9a3r1	0.216043	2.55373	0.014489	0.178319
Q61885	Myelin-oligodendrocyte glycoprotein	Mog	-0.343564	-2.55443	0.0144641	0.178319
O70318	Band 4.1-like protein 2	Epb41l2	0.188489	2.54785	0.0147008	0.17993
Q99MR3	Solute carrier family 12 member 9	Slc12a9	0.391059	2.54704	0.0147302	0.17993
P05132	cAMP-dependent protein kinase catalytic subunit alpha	Prkaca	-0.262186	-2.54384	0.0148469	0.180126
Q3UTZ3	Uncharacterized protein C7orf43 homolog		0.505112	2.54485	0.0148099	0.180126
Q8JZK9	Hydroxymethylglutaryl-CoA synthase, cytoplasmic	Hmgcs1	0.429155	2.53335	0.0152347	0.184206
P30275;Q6P8J7;REV__Q3UHQ6	Creatine kinase U-type, mitochondrial	Ckmt1	-0.185711	-2.5319	0.0152893	0.184244
P10637	Microtubule-associated protein tau	Mapt	-0.208262	-2.52946	0.0153811	0.184266
Q61548	Clathrin coat assembly protein AP180	Snap91	-0.165806	-2.52775	0.0154456	0.184266
Q8R1Y2	Uncharacterized protein C16orf45 homolog		1.18973	2.5279	0.0154401	0.184266
O08532	Voltage-dependent calcium channel subunit alpha-2/delta-1;Voltage-dependent calcium channel subunit alpha-2-1;Voltage-dependent calcium channel subunit delta-1	Cacna2d1	-0.160838	-2.52429	0.0155775	0.185223
Q80V26	Inositol monophosphatase 3	Impad1	0.307906	2.5216	0.0156805	0.18583
Q8BGZ1	Hippocalcin-like protein 4	Hpcal4	-0.151071	-2.51784	0.0158254	0.186928
Q01730	Ras suppressor protein 1	Rsu1	0.330874	2.51475	0.0159457	0.187729
B1AXV0	DOMON domain-containing protein FRRS1L	Frrs1l	-0.287569	-2.49841	0.016595	0.190364
P62874;Q61011	Guanine nucleotide-binding protein G(I)/G(S)/G(T) subunit beta-1	Gnb1	-0.156015	-2.50711	0.0162463	0.190364
Q64299	Protein NOV homolog	Nov	0.577219	2.49883	0.0165781	0.190364
Q8BTG7	Protein NDRG4	Ndrg4	0.280177	2.50273	0.016421	0.190364
Q8CHP5	Partner of Y14 and mago	Wibg	-0.426205	-2.50058	0.0165073	0.190364
Q99NF2	NMDA receptor synaptonuclear signaling and neuronal migration factor	Nsmf	-0.405129	-2.50187	0.0164556	0.190364
Q9D9V3	Ethylmalonyl-CoA decarboxylase	Echdc1	0.230951	2.499	0.0165713	0.190364
Q9QXK3	Coatomer subunit gamma-2	Copg2	0.399688	2.50614	0.0162848	0.190364
Q5DU25	IQ motif and SEC7 domain-containing protein 2	Iqsec2	-0.175866	-2.49089	0.0169021	0.193267
P16254	Signal recognition particle 14 kDa protein;Signal recognition particle 14 kDa protein, N-terminally processed	Srp14	-0.25843	-2.47902	0.0173968	0.193515
P16675	Lysosomal protective protein;Lysosomal protective protein 32 kDa chain;Lysosomal protective protein 20 kDa chain	Ctsa	0.433959	2.48349	0.0172089	0.193515
Q07076	Annexin A7	Anxa7	0.301954	2.48391	0.0171914	0.193515
Q61206	Platelet-activating factor acetylhydrolase IB subunit beta	Pafah1b2	-0.205451	-2.47361	0.0176267	0.193515
Q69ZW3	EH domain-binding protein 1	Ehbp1	0.806269	2.47493	0.0175701	0.193515
Q6ZPE2	Myotubularin-related protein 5	Sbf1	-0.158893	-2.47465	0.0175824	0.193515
Q8BLK3	Limbic system-associated membrane protein	Lsamp	-0.194477	-2.48506	0.0171431	0.193515
Q91W43	Glycine dehydrogenase (decarboxylating), mitochondrial	Gldc	-0.365077	-2.47744	0.0174636	0.193515
Q91WA3	Histone deacetylase 11	Hdac11	-0.624577	-2.47589	0.0175293	0.193515
Q91YH5	Atlastin-3	Atl3	-0.354103	-2.48722	0.0170536	0.193515
Q99J09	Methylosome protein 50	Wdr77	-0.364757	-2.47922	0.0173881	0.193515
Q9D773	39S ribosomal protein L2, mitochondrial	Mrpl2	-0.387216	-2.48675	0.0170729	0.193515
Q9QYB1	Chloride intracellular channel protein 4	Clic4	0.238205	2.48081	0.0173212	0.193515
P97429	Annexin A4	Anxa4	0.668696	2.47135	0.0177233	0.193981
Q9CQE5	Regulator of G-protein signaling 10	Rgs10	0.442493	2.45812	0.0183	0.199682
O70433	Four and a half LIM domains protein 2	Fhl2	-0.31907	-2.45231	0.018559	0.201102
Q9EQ06;Q8VCR2	Estradiol 17-beta-dehydrogenase 11	Hsd17b11	0.470557	2.45222	0.018563	0.201102
Q9QYR6	Microtubule-associated protein 1A;MAP1A heavy chain;MAP1 light chain LC2	Map1a	-0.137512	-2.45142	0.0185987	0.201102
Q08274	Dystrophia myotonica WD repeat-containing protein	Dmwd	-0.305733	-2.44832	0.0187381	0.201999
O88983	Syntaxin-8	Stx8	0.400952	2.4446	0.0189071	0.2026
P16054;P23298	Protein kinase C epsilon type	Prkce	-0.148711	-2.44533	0.018874	0.2026
P06801	NADP-dependent malic enzyme	Me1	0.24584	2.43196	0.0194908	0.206182
P17426	AP-2 complex subunit alpha-1	Ap2a1	-0.154132	-2.43296	0.0194439	0.206182
Q3UNH4	G protein-regulated inducer of neurite outgrowth 1	Gprin1	-0.211733	-2.43114	0.0195294	0.206182
Q8CGY8	UDP-N-acetylglucosamine--peptide N-acetylglucosaminyltransferase 110 kDa subunit	Ogt	-0.19391	-2.43537	0.0193319	0.206182
Q9CZ13	Cytochrome b-c1 complex subunit 1, mitochondrial	Uqcrc1	-0.133243	-2.43442	0.0193758	0.206182
Q80YA9;Q8BMA3	Connector enhancer of kinase suppressor of ras 2	Cnksr2	-0.168238	-2.42044	0.020037	0.210919
O55126	Protein NipSnap homolog 2	Gbas	-0.195409	-2.41335	0.0203804	0.213279
Q62277	Synaptophysin	Syp	-0.23631	-2.41441	0.0203288	0.213279
Q91YQ5	Dolichyl-diphosphooligosaccharide--protein glycosyltransferase subunit 1	Rpn1	0.168216	2.41084	0.0205031	0.213483
Q9JJV5	Voltage-dependent calcium channel gamma-3 subunit	Cacng3	-0.426599	-2.41051	0.0205192	0.213483
P27671	Ras-specific guanine nucleotide-releasing factor 1	Rasgrf1	-0.282862	-2.40866	0.0206102	0.213808
O70439	Syntaxin-7	Stx7	0.284776	2.40191	0.0209453	0.214613
Q80UG5	Septin-9	2023-09-09	-0.219784	-2.40176	0.0209527	0.214613
Q8BG39;Q69ZS6	Synaptic vesicle glycoprotein 2B	Sv2b	-0.189247	-2.40134	0.0209734	0.214613
Q91VR5	ATP-dependent RNA helicase DDX1	Ddx1	0.197517	2.40106	0.0209875	0.214613
Q9CQH7	Transcription factor BTF3 homolog 4	Btf3l4	0.362379	2.40228	0.0209264	0.214613
E9Q401	Ryanodine receptor 2	Ryr2	-0.171866	-2.39495	0.0212957	0.215441
P21981	Protein-glutamine gamma-glutamyltransferase 2	Tgm2	0.819252	2.39556	0.0212647	0.215441
Q62261;Q99MJ6	Spectrin beta chain, non-erythrocytic 1	Sptbn1	-0.123359	-2.39545	0.0212701	0.215441
Q9D114	Guanosine-3,5-bis(diphosphate) 3-pyrophosphohydrolase MESH1	Hddc3	-0.433731	-2.39468	0.0213093	0.215441
Q8CBE3	WD repeat-containing protein 37	Wdr37	-0.208944	-2.38911	0.0215936	0.2177
Q99KC8	von Willebrand factor A domain-containing protein 5A	Vwa5a	0.393777	2.38469	0.0218216	0.219381
Q9DCJ9	N-acetylneuraminate lyase	Npl	1.03758	2.38236	0.0219429	0.219982
Q9WV34	MAGUK p55 subfamily member 2	Mpp2	-0.175243	-2.38072	0.0220284	0.220222
P35436	Glutamate receptor ionotropic, NMDA 2A	Grin2a	-0.259887	-2.37876	0.0221315	0.220637
P83510	Traf2 and NCK-interacting protein kinase	Tnik	-0.588531	-2.37733	0.0222064	0.220768
P47757	F-actin-capping protein subunit beta	Capzb	-0.139869	-2.3717	0.0225051	0.223119
Q9DC16	Endoplasmic reticulum-Golgi intermediate compartment protein 1	Ergic1	-0.230325	-2.36326	0.0229589	0.226989
Q9Z2Q6	Septin-5	2023-09-05	-0.174252	-2.36183	0.0230367	0.227131
O35621;Q9Z2M7	Phosphomannomutase 1	Pmm1	-0.302238	-2.35882	0.0232014	0.228126
Q8C561	LMBR1 domain-containing protein 2	Lmbrd2	0.37528	2.35363	0.0234871	0.230302
P05202	Aspartate aminotransferase, mitochondrial	Got2	-0.206041	-2.3467	0.0238745	0.232288
Q8CAA7	Glucose 1,6-bisphosphate synthase	Pgm2l1	-0.173277	-2.34822	0.023789	0.232288
Q8VDD5	Myosin-9	Myh9	0.203161	2.34652	0.0238843	0.232288
O88737	Protein bassoon	Bsn	-0.154693	-2.34258	0.0241069	0.233818
Q9Z1B3	1-phosphatidylinositol 4,5-bisphosphate phosphodiesterase beta-1	Plcb1	-0.125418	-2.34108	0.0241924	0.234013
P62307	Small nuclear ribonucleoprotein F	Snrpf	0.428198	2.33854	0.0243372	0.234779
Q9JMF3	Guanine nucleotide-binding protein G(I)/G(S)/G(O) subunit gamma-13	Gng13	-0.593067	-2.33494	0.0245441	0.236138
Q8BP92	Reticulocalbin-2	Rcn2	0.278425	2.33348	0.0246281	0.236311
Q9JHU9	Inositol-3-phosphate synthase 1	Isyna1	0.455891	2.33032	0.0248118	0.237437
Q8CH18	Cell division cycle and apoptosis regulator protein 1	Ccar1	-0.350491	-2.32395	0.025185	0.237829
Q9D708		S100a16	0.282318	2.32803	0.0249454	0.237829
Q9DCL8	Protein phosphatase inhibitor 2	Ppp1r2	-0.277889	-2.32483	0.0251329	0.237829
Q9R0K7	Plasma membrane calcium-transporting ATPase 2	Atp2b2	-0.150227	-2.3264	0.025041	0.237829
Q9WUM5	Succinyl-CoA ligase [ADP/GDP-forming] subunit alpha, mitochondrial	Suclg1	-0.227211	-2.32459	0.0251471	0.237829
Q8C7H1	Methylmalonic aciduria type A homolog, mitochondrial	Mmaa	0.299763	2.32121	0.025347	0.238102
Q9D6J6	NADH dehydrogenase [ubiquinone] flavoprotein 2, mitochondrial	Ndufv2	-0.146236	-2.32211	0.0252936	0.238102
Q8C547	HEAT repeat-containing protein 5B	Heatr5b	-0.410364	-2.31973	0.0254352	0.238305
Q9Z1T2	Thrombospondin-4	Thbs4	0.584842	2.3185	0.0255085	0.238368
P11499	Heat shock protein HSP 90-beta	Hsp90ab1	0.168435	2.31485	0.0257272	0.238543
P43276	Histone H1.5	Hist1h1b	0.30557	2.31546	0.0256906	0.238543
Q8QZY9	Splicing factor 3B subunit 4	Sf3b4	0.609806	2.3149	0.0257242	0.238543
P42225	Signal transducer and activator of transcription 1	Stat1	2.08748	2.31277	0.0258522	0.239078
Q8BMF4	Dihydrolipoyllysine-residue acetyltransferase component of pyruvate dehydrogenase complex, mitochondrial	Dlat	-0.161855	-2.31168	0.0259185	0.239078
Q5SWU9;E9Q4Z2	Acetyl-CoA carboxylase 1;Biotin carboxylase	Acaca	0.47945	2.30864	0.0261029	0.239904
Q91Z38	Tetratricopeptide repeat protein 1	Ttc1	0.336628	2.30663	0.0262256	0.239904
Q921G7	Electron transfer flavoprotein-ubiquinone oxidoreductase, mitochondrial	Etfdh	-0.176843	-2.30581	0.0262762	0.239904
Q9CR95	Adaptin ear-binding coat-associated protein 1	Necap1	-0.267689	-2.30636	0.0262422	0.239904
Q91V76	Ester hydrolase C11orf54 homolog		0.209229	2.30203	0.0265088	0.241412
Q8BQP9	Regulator of G-protein signaling 7-binding protein	Rgs7bp	-0.446098	-2.29979	0.0266475	0.24206
Q68FF6;Q9JLQ2	ARF GTPase-activating protein GIT1	Git1	-0.187351	-2.2968	0.0268334	0.242517
Q8BWT1	3-ketoacyl-CoA thiolase, mitochondrial	Acaa2	-0.277833	-2.29725	0.0268054	0.242517
P62743	AP-2 complex subunit sigma	Ap2s1	-0.188919	-2.29465	0.0269677	0.243117
A2A8L5	Receptor-type tyrosine-protein phosphatase F	Ptprf	0.553307	2.29123	0.0271832	0.243831
O09111	NADH dehydrogenase [ubiquinone] 1 beta subcomplex subunit 11, mitochondrial	Ndufb11	-0.19577	-2.29153	0.0271646	0.243831
Q9D0K2	Succinyl-CoA:3-ketoacid coenzyme A transferase 1, mitochondrial	Oxct1	-0.166389	-2.28573	0.0275326	0.245733
Q9Z2U1	Proteasome subunit alpha type-5	Psma5	0.185634	2.28645	0.0274865	0.245733
Q6IQX7	Chondroitin sulfate synthase 2	Chpf	0.493216	2.28164	0.0277953	0.247461
P53986	Monocarboxylate transporter 1	Slc16a1	0.389006	2.27304	0.0283544	0.250056
Q62288;Q8BKV0	Testican-1	Spock1	0.677155	2.27486	0.0282351	0.250056
Q8VDJ3	Vigilin	Hdlbp	0.230504	2.27286	0.0283663	0.250056
Q9D1Q6	Endoplasmic reticulum resident protein 44	Erp44	0.323227	2.27357	0.0283198	0.250056
Q68FH0	Plakophilin-4	Pkp4	-0.201659	-2.2718	0.0284363	0.250058
P10605	Cathepsin B;Cathepsin B light chain;Cathepsin B heavy chain	Ctsb	0.275708	2.2694	0.0285945	0.250073
P26450	Phosphatidylinositol 3-kinase regulatory subunit alpha	Pik3r1	0.385386	2.26754	0.0287175	0.250073
Q8BH59	Calcium-binding mitochondrial carrier protein Aralar1	Slc25a12	-0.142681	-2.26812	0.0286788	0.250073
Q9Z1M4;Q8BSK8	Ribosomal protein S6 kinase beta-2;Ribosomal protein S6 kinase beta-1	Rps6kb2;Rps6kb1	-0.225281	-2.26962	0.0285795	0.250073
D3Z7P3	Glutaminase kidney isoform, mitochondrial	Gls	-0.342258	-2.26411	0.028946	0.250378
Q03157	Amyloid-like protein 1;C30	Aplp1	0.395414	2.26274	0.0290376	0.250378
Q2PFD7	PH and SEC7 domain-containing protein 3	Psd3	-0.200629	-2.26073	0.0291723	0.250378
Q99PL5	Ribosome-binding protein 1	Rrbp1	0.584154	2.26137	0.0291297	0.250378
Q9D6R2	Isocitrate dehydrogenase [NAD] subunit alpha, mitochondrial	Idh3a	-0.176524	-2.26531	0.0288657	0.250378
Q9QXY6	EH domain-containing protein 3	Ehd3	-0.28158	-2.26121	0.0291403	0.250378
P35438	Glutamate receptor ionotropic, NMDA 1	Grin1	-0.187163	-2.25853	0.0293213	0.250456
Q9QYB5	Gamma-adducin	Add3	0.199188	2.25927	0.0292712	0.250456
Q8R0G9	Nuclear pore complex protein Nup133	Nup133	0.486816	2.2535	0.0296625	0.252767
Q5DTT2	PH and SEC7 domain-containing protein 1	Psd	-0.341709	-2.2524	0.0297379	0.252807
P47746	Cannabinoid receptor 1	Cnr1	-0.311066	-2.24946	0.0299401	0.253454
Q8K010	5-oxoprolinase	Oplah	0.299343	2.24923	0.0299555	0.253454
P46460	Vesicle-fusing ATPase	Nsf	-0.124648	-2.24607	0.0301739	0.254699
Q8BHZ0	Protein FAM49A	Fam49a	-0.173652	-2.24357	0.0303478	0.254964
Q8K0V4	CCR4-NOT transcription complex subunit 3	Cnot3	0.40654	2.24427	0.0302994	0.254964
Q99LE6	ATP-binding cassette sub-family F member 2	Abcf2	-0.384982	-2.23782	0.0307516	0.257752
Q9Z1R2	Large proline-rich protein BAG6	Bag6	-0.19176	-2.23549	0.0309164	0.258527
O35954	Membrane-associated phosphatidylinositol transfer protein 1	Pitpnm1	-0.195373	-2.23173	0.0311832	0.259592
Q64444	Carbonic anhydrase 4	Ca4	-0.2551	-2.23166	0.0311887	0.259592
G3X9J0		Sipa1l3	-0.254563	-2.2279	0.0314579	0.259855
P55096	ATP-binding cassette sub-family D member 3	Abcd3	0.352586	2.22681	0.0315368	0.259855
Q80UP3	Diacylglycerol kinase zeta	Dgkz	-0.288542	-2.22691	0.0315295	0.259855
Q8C5W0	Calmin	Clmn	0.404847	2.22616	0.0315833	0.259855
Q9CXY6	Interleukin enhancer-binding factor 2	Ilf2	0.196295	2.22838	0.0314236	0.259855
Q6PHZ2	Calcium/calmodulin-dependent protein kinase type II subunit delta	Camk2d	-0.234465	-2.22496	0.0316706	0.259975
Q922B2	Aspartate--tRNA ligase, cytoplasmic	Dars	-0.148901	-2.22236	0.0318595	0.260927
Q9WV80	Sorting nexin-1	Snx1	0.283635	2.21915	0.0320938	0.262246
O35459	Delta(3,5)-Delta(2,4)-dienoyl-CoA isomerase, mitochondrial	Ech1	-0.345242	-2.21218	0.0326081	0.264411
P63024	Vesicle-associated membrane protein 3	Vamp3	0.691413	2.20989	0.0327786	0.264411
Q62417	Sorbin and SH3 domain-containing protein 1	Sorbs1	0.315208	2.21421	0.0324574	0.264411
Q7TSS2;Q8K2Z8	Ubiquitin-conjugating enzyme E2 Q1	Ube2q1	-0.292048	-2.21331	0.0325238	0.264411
Q8BGH2	Sorting and assembly machinery component 50 homolog	Samm50	-0.220785	-2.20957	0.0328021	0.264411
Q9ERD7	Tubulin beta-3 chain	Tubb3	-0.14231	-2.2097	0.032793	0.264411
Q61234;Q61235	Alpha-1-syntrophin	Snta1	0.329343	2.20746	0.0329603	0.26509
Q60598	Src substrate cortactin	Cttn	-0.157862	-2.20183	0.0333853	0.267906
P23116	Eukaryotic translation initiation factor 3 subunit A	Eif3a	0.198519	2.19873	0.0336209	0.268324
Q8BHL3	TBC1 domain family member 10B	Tbc1d10b	-0.473269	-2.19875	0.0336194	0.268324
Q91WG5;O54950	5-AMP-activated protein kinase subunit gamma-2	Prkag2	0.34364	2.19819	0.0336624	0.268324
Q8BKZ9	Pyruvate dehydrogenase protein X component, mitochondrial	Pdhx	-0.170245	-2.1967	0.0337764	0.268635
P39054	Dynamin-2	Dnm2	0.382488	2.19435	0.0339569	0.268875
Q64487	Receptor-type tyrosine-protein phosphatase delta	Ptprd	-0.244759	-2.19482	0.0339211	0.268875
P20029	78 kDa glucose-regulated protein	Hspa5	0.183413	2.19322	0.0340444	0.268973
Q14BB9	MAP6 domain-containing protein 1	Map6d1	-0.225	-2.19031	0.0342695	0.269613
Q8C3Q5	Protein shisa-7	Shisa7	0.405098	2.19023	0.0342761	0.269613
O35927	Catenin delta-2	Ctnnd2	-0.177961	-2.18244	0.0348852	0.273803
P84091	AP-2 complex subunit mu	Ap2m1	-0.147659	-2.18073	0.0350207	0.274265
Q9DCN2	NADH-cytochrome b5 reductase 3;NADH-cytochrome b5 reductase 3 membrane-bound form;NADH-cytochrome b5 reductase 3 soluble form	Cyb5r3	0.158779	2.17831	0.0352125	0.275165
O55137;Q8BWN8	Acyl-coenzyme A thioesterase 1	Acot1	0.492528	2.17721	0.0353005	0.275251
Q9DCS9	NADH dehydrogenase [ubiquinone] 1 beta subcomplex subunit 10	Ndufb10	-0.201765	-2.17426	0.0355359	0.276485
O08539	Myc box-dependent-interacting protein 1	Bin1	-0.155036	-2.16942	0.0359261	0.276515
O08599	Syntaxin-binding protein 1	Stxbp1	-0.131673	-2.16962	0.0359099	0.276515
O35988	Syndecan-4	Sdc4	0.431144	2.17102	0.035797	0.276515
P60202	Myelin proteolipid protein	Plp1	-0.320778	-2.16997	0.035882	0.276515
Q3UNZ8	Quinone oxidoreductase-like protein 2		0.515786	2.16942	0.0359261	0.276515
B1AXH1	NHS-like protein 2	Nhsl2	-0.447016	-2.16511	0.0362764	0.278612
Q3UH68	LIM and calponin homology domains-containing protein 1	Limch1	0.297289	2.15962	0.0367275	0.279594
Q922H2	[Pyruvate dehydrogenase (acetyl-transferring)] kinase isozyme 3, mitochondrial	Pdk3	-0.283362	-2.15918	0.0367642	0.279594
Q99LD9	Translation initiation factor eIF-2B subunit beta	Eif2b2	-0.266413	-2.16203	0.0365292	0.279594
Q9CWE0	Mitochondrial fission regulator 1-like	Mtfr1l	-0.271616	-2.16152	0.0365714	0.279594
Q9JMG1	Endothelial differentiation-related factor 1	Edf1	0.379896	2.1588	0.0367949	0.279594
Q08460	Calcium-activated potassium channel subunit alpha-1	Kcnma1	-0.218327	-2.15785	0.0368737	0.279599
Q5PR73	GTP-binding protein Di-Ras2	Diras2	-0.200196	-2.15506	0.0371057	0.280764
Q00612;P97324	Glucose-6-phosphate 1-dehydrogenase X	G6pdx	0.178411	2.15097	0.0374478	0.282755
Q9JM96	Cdc42 effector protein 4	Cdc42ep4	0.246215	2.14834	0.0376692	0.283828
P20917	Myelin-associated glycoprotein	Mag	-0.306942	-2.14574	0.0378893	0.284886
Q01097;Q03391	Glutamate receptor ionotropic, NMDA 2B	Grin2b	-0.141794	-2.14472	0.0379763	0.284942
P16546	Spectrin alpha chain, non-erythrocytic 1	Sptan1	-0.136079	-2.1365	0.038681	0.28792
P50153	Guanine nucleotide-binding protein G(I)/G(S)/G(O) subunit gamma-4	Gng4	-0.388868	-2.13773	0.038575	0.28792
Q80TB8	Synaptic vesicle membrane protein VAT-1 homolog-like	Vat1l	-0.45861	-2.13634	0.0386951	0.28792
Q9D0M5	Dynein light chain 2, cytoplasmic	Dynll2	-0.192448	-2.13733	0.038609	0.28792
P09405	Nucleolin	Ncl	0.134172	2.13173	0.0390947	0.29029
P62827	GTP-binding nuclear protein Ran	Ran	-0.21174	-2.12772	0.0394464	0.291903
Q99P72	Reticulon-4	Rtn4	-0.117965	-2.12739	0.039475	0.291903
O88587	Catechol O-methyltransferase	Comt	0.333179	2.12515	0.0396725	0.292759
O70503	Very-long-chain 3-oxoacyl-CoA reductase	Hsd17b12	0.325615	2.10692	0.0413132	0.295239
P28652	Calcium/calmodulin-dependent protein kinase type II subunit beta	Camk2b	-0.188564	-2.11325	0.0407368	0.295239
P29699	Alpha-2-HS-glycoprotein	Ahsg	0.663174	2.11138	0.0409066	0.295239
P46096	Synaptotagmin-1	Syt1	-0.11738	-2.11164	0.0408827	0.295239
P46467	Vacuolar protein sorting-associated protein 4B	Vps4b	0.261193	2.11088	0.0409515	0.295239
P58871	182 kDa tankyrase-1-binding protein	Tnks1bp1	-0.151151	-2.10918	0.0411065	0.295239
P63276	40S ribosomal protein S17	Rps17	0.227986	2.11163	0.0408839	0.295239
Q14BI2	Metabotropic glutamate receptor 2	Grm2	-0.29724	-2.11401	0.0406686	0.295239
Q3TXX4;Q8BFU8;Q5SZA1;Q61983	Vesicular glutamate transporter 1	Slc17a7	-0.189388	-2.11176	0.0408717	0.295239
Q3U5Q7	UMP-CMP kinase 2, mitochondrial	Cmpk2	0.661352	2.11777	0.0403302	0.295239
Q3UQ44	Ras GTPase-activating-like protein IQGAP2	Iqgap2	-0.276917	-2.10523	0.0414683	0.295239
Q3URD3	Sarcolemmal membrane-associated protein	Slmap	0.279655	2.1087	0.0411501	0.295239
Q60738	Zinc transporter 1	Slc30a1	0.287573	2.10495	0.0414936	0.295239
Q811S7	Upstream-binding protein 1	Ubp1	-0.482271	-2.11826	0.040286	0.295239
Q922R1	UPF0183 protein C16orf70 homolog		-0.77544	-2.11752	0.0403525	0.295239
Q99PL6	UBX domain-containing protein 6	Ubxn6	-0.149968	-2.10525	0.0414667	0.295239
Q9CZJ2	Heat shock 70 kDa protein 12B	Hspa12b	-0.394811	-2.11938	0.0401854	0.295239
Q9Z0H3	SWI/SNF-related matrix-associated actin-dependent regulator of chromatin subfamily B member 1	Smarcb1	-0.190724	-2.10746	0.0412638	0.295239
Q61151	Serine/threonine-protein phosphatase 2A 56 kDa regulatory subunit epsilon isoform	Ppp2r5e	-0.162673	-2.10309	0.041665	0.295871
Q9JIF0	Protein arginine N-methyltransferase 1	Prmt1	-0.198293	-2.10123	0.041837	0.296504
P28650	Adenylosuccinate synthetase isozyme 1	Adssl1	0.347235	2.09908	0.0420363	0.296605
P47963	60S ribosomal protein L13	Rpl13	0.146359	2.09879	0.0420636	0.296605
Q80ZJ1	Ras-related protein Rap-2a	Rap2a	-0.200218	-2.0984	0.0420998	0.296605
Q8K4Q0	Regulatory-associated protein of mTOR	Rptor	-0.474887	-2.09661	0.0422668	0.296614
Q9D6J5	NADH dehydrogenase [ubiquinone] 1 beta subcomplex subunit 8, mitochondrial	Ndufb8	-0.141818	-2.09707	0.0422235	0.296614
P13707	Glycerol-3-phosphate dehydrogenase [NAD(+)], cytoplasmic	Gpd1	-0.210675	-2.09104	0.0427905	0.298533
P84075	Neuron-specific calcium-binding protein hippocalcin	Hpca	-0.209351	-2.09262	0.0426409	0.298533
Q8BNI4	Derlin-2	Derl2	0.378662	2.09141	0.0427556	0.298533
O35841	Apoptosis inhibitor 5	Api5	0.274873	2.0831	0.043546	0.299138
Q56A07	Sodium channel subunit beta-2	Scn2b	-0.328116	-2.08667	0.0432049	0.299138
Q6PAK3	Protein arginine N-methyltransferase 8	Prmt8	-0.573523	-2.08687	0.0431859	0.299138
Q91WG7	Diacylglycerol kinase gamma	Dgkg	-0.203084	-2.08652	0.0432194	0.299138
Q99JI4	26S proteasome non-ATPase regulatory subunit 6	Psmd6	-0.264958	-2.08437	0.0434247	0.299138
Q9D0M1	Phosphoribosyl pyrophosphate synthase-associated protein 1	Prpsap1	0.227978	2.08409	0.043451	0.299138
Q9D2R0	Acetoacetyl-CoA synthetase	Aacs	-0.387964	-2.0838	0.0434788	0.299138
Q9D6S7	Ribosome-recycling factor, mitochondrial	Mrrf	0.264299	2.08724	0.04315	0.299138
Q8BK63	Casein kinase I isoform alpha	Csnk1a1	0.240791	2.08186	0.0436654	0.299384
F8VPU2	FERM, RhoGEF and pleckstrin domain-containing protein 1	Farp1	0.175681	2.07667	0.0441665	0.299947
O70194	Eukaryotic translation initiation factor 3 subunit D	Eif3d	0.279697	2.07852	0.0439875	0.299947
P10649;P19639;O35660	Glutathione S-transferase Mu 1	Gstm1	0.168518	2.07758	0.0440779	0.299947
Q9CVB6	Actin-related protein 2/3 complex subunit 2	Arpc2	-0.136706	-2.07705	0.0441296	0.299947
Q9Z0U1;Q9QXY1	Tight junction protein ZO-2	Tjp2	0.382394	2.07814	0.0440242	0.299947
Q99KK2	N-acylneuraminate cytidylyltransferase	Cmas	0.365014	2.07432	0.0443955	0.300422
Q9D051	Pyruvate dehydrogenase E1 component subunit beta, mitochondrial	Pdhb	-0.114587	-2.07423	0.0444043	0.300422
P52800	Ephrin-B2	Efnb2	-0.399306	-2.07165	0.0446561	0.301555
P97351	40S ribosomal protein S3a	Rps3a	0.227521	2.06993	0.0448252	0.301559
Q3UH60	Disco-interacting protein 2 homolog B	Dip2b	-0.35264	-2.07038	0.0447812	0.301559
P13595	Neural cell adhesion molecule 1	Ncam1	-0.114132	-2.06436	0.0453757	0.304144
P63242	Eukaryotic translation initiation factor 5A-1	Eif5a	-0.167623	-2.06433	0.0453795	0.304144
P34022	Ran-specific GTPase-activating protein	Ranbp1	0.222122	2.06222	0.0455889	0.304408
P97370	Sodium/potassium-transporting ATPase subunit beta-3	Atp1b3	-0.233003	-2.06235	0.0455767	0.304408
O35682	Myeloid-associated differentiation marker	Myadm	0.33854	2.05281	0.0465368	0.308045
P56695	Wolframin	Wfs1	-0.258844	-2.05255	0.0465639	0.308045
Q5SV85	Synergin gamma	Synrg	-0.248683	-2.05454	0.0463615	0.308045
Q9CQC7	NADH dehydrogenase [ubiquinone] 1 beta subcomplex subunit 4	Ndufb4	-0.154645	-2.05298	0.04652	0.308045
Q9DBR1	5-3 exoribonuclease 2	Xrn2	-0.417421	-2.05331	0.0464868	0.308045
O70325	Phospholipid hydroperoxide glutathione peroxidase, mitochondrial	Gpx4	-0.234434	-2.05117	0.0467043	0.308403
Q91ZA3	Propionyl-CoA carboxylase alpha chain, mitochondrial	Pcca	-0.176721	-2.04566	0.0472692	0.310986
Q9JHR7	Insulin-degrading enzyme	Ide	0.309937	2.04606	0.0472277	0.310986
O55143;Q8R429;Q64518	Sarcoplasmic/endoplasmic reticulum calcium ATPase 2	Atp2a2	-0.0986842	-2.04303	0.0475408	0.312199
Q6DFW0	Protein C9orf72 homolog		0.280677	2.03966	0.0478909	0.312942
Q8BH04	Phosphoenolpyruvate carboxykinase [GTP], mitochondrial	Pck2	-0.178462	-2.04054	0.0477986	0.312942
Q9EPQ7	StAR-related lipid transfer protein 5	Stard5	-0.373905	-2.03942	0.0479162	0.312942
Q60829	Protein phosphatase 1 regulatory subunit 1B	Ppp1r1b	-0.268951	-2.03412	0.0484715	0.313645
Q61102	ATP-binding cassette sub-family B member 7, mitochondrial	Abcb7	-0.298524	-2.03374	0.048511	0.313645
Q71LX4	Talin-2	Tln2	-0.116432	-2.03489	0.04839	0.313645
Q8VD37	SH3-containing GRB2-like protein 3-interacting protein 1	Sgip1	-0.124189	-2.03652	0.0482185	0.313645
Q9D394	Protein RUFY3	Rufy3	0.162257	2.03337	0.0485497	0.313645
Q9R1V4	Disintegrin and metalloproteinase domain-containing protein 11	Adam11	-0.290896	-2.03664	0.0482068	0.313645
P56564	Excitatory amino acid transporter 1	Slc1a3	0.190672	2.0278	0.0491409	0.315189
Q9CQ89	Protein CutA	Cuta	-0.349559	-2.02831	0.0490863	0.315189
Q9ERT9	Protein phosphatase 1 regulatory subunit 1A	Ppp1r1a	-0.204041	-2.02978	0.0489299	0.315189
Q9QYG0	Protein NDRG2	Ndrg2	0.170822	2.02893	0.0490199	0.315189
P23953;Q8VCT4;Q8VCC2;Q64176;Q91WU0	Carboxylesterase 1C	Ces1c	-0.493417	-2.02619	0.0493129	0.315726
P59281	Rho GTPase-activating protein 39	Arhgap39	-0.286725	-2.0248	0.0494614	0.316112
P11627	Neural cell adhesion molecule L1	L1cam	-0.226464	-2.02264	0.0496933	0.316387
P61082	NEDD8-conjugating enzyme Ubc12	Ube2m	-0.256311	-2.02354	0.0495968	0.316387
Q8BNW9	Kelch repeat and BTB domain-containing protein 11	Kbtbd11	-0.179995	-2.02193	0.0497698	0.316387
Q8BYK6	YTH domain-containing family protein 3	Ythdf3	0.270266	2.02079	0.0498929	0.316608
P56379	6.8 kDa mitochondrial proteolipid	Mp68	-0.269052	-2.01693	0.0503109	0.318132
Q9DB27;Q9CQ21	Malignant T-cell-amplified sequence 1	Mcts1	-0.218121	-2.01725	0.050277	0.318132
P47753	F-actin-capping protein subunit alpha-1	Capza1	0.203411	2.0152	0.0504993	0.318199
Q9JJA9	General receptor for phosphoinositides 1-associated scaffold protein	Grasp	-0.284077	-2.01521	0.0504986	0.318199
Q9JK42	[Pyruvate dehydrogenase (acetyl-transferring)] kinase isozyme 2, mitochondrial	Pdk2	-0.305408	-2.01342	0.050694	0.318864
Q8VED9	Galectin-related protein	Lgalsl	-0.263824	-2.01076	0.0509866	0.319872
Q99KW9	T-cell immunomodulatory protein	Itfg1	0.378987	2.01034	0.0510329	0.319872
Q69ZS8	Kazrin	Kazn	0.250741	2.00944	0.051132	0.319932
A2AN08	E3 ubiquitin-protein ligase UBR4	Ubr4	-0.238455	-1.99975	0.0522102	0.32554
Q3V3R1	Monofunctional C1-tetrahydrofolate synthase, mitochondrial	Mthfd1l	-0.453358	-2.00013	0.0521681	0.32554
O09131;Q8K2Q2	Glutathione S-transferase omega-1	Gsto1	0.286289	1.99502	0.0527446	0.326032
P62849	40S ribosomal protein S24	Rps24	0.290706	1.99688	0.0525343	0.326032
Q60692	Proteasome subunit beta type-6	Psmb6	-0.310696	-1.99566	0.0526716	0.326032
Q8C0L9	Glycerophosphocholine phosphodiesterase GPCPD1	Gpcpd1	-0.312019	-1.99518	0.0527259	0.326032
Q9R1K9;P41209	Centrin-2	Cetn2	-0.358513	-1.99556	0.0526833	0.326032
O54991	Contactin-associated protein 1	Cntnap1	-0.144179	-1.99285	0.0529905	0.326988
P42208	Septin-2	2023-09-02	0.158198	1.99078	0.0532264	0.327163
P51863	V-type proton ATPase subunit d 1	Atp6v0d1	-0.135883	-1.99064	0.0532428	0.327163
Q9QVP9	Protein-tyrosine kinase 2-beta	Ptk2b	-0.126182	-1.9902	0.053293	0.327163
O08919	Numb-like protein	Numbl	-0.177367	-1.98915	0.0534137	0.32722
Q3TC72	Fumarylacetoacetate hydrolase domain-containing protein 2A	Fahd2	-0.216359	-1.98773	0.0535766	0.32722
Q9DCX2	ATP synthase subunit d, mitochondrial	Atp5h	-0.136692	-1.98842	0.0534971	0.32722
Q9JKP5	Muscleblind-like protein 1	Mbnl1	0.337716	1.98612	0.0537615	0.327373
Q9Z351	Potassium voltage-gated channel subfamily KQT member 2	Kcnq2	-0.350163	-1.98592	0.0537846	0.327373
O35405	Phospholipase D3	Pld3	0.240176	1.9762	0.0549147	0.329087
P40124	Adenylyl cyclase-associated protein 1	Cap1	0.123752	1.9756	0.0549858	0.329087
P70175	Disks large homolog 3	Dlg3	-0.128507	-1.98143	0.0543039	0.329087
Q3UHD6	Sorting nexin-27	Snx27	0.312424	1.97657	0.0548714	0.329087
Q60996	Serine/threonine-protein phosphatase 2A 56 kDa regulatory subunit gamma isoform	Ppp2r5c	-0.201967	-1.98259	0.0541693	0.329087
Q61411	GTPase HRas;GTPase HRas, N-terminally processed	Hras	-0.172179	-1.97859	0.0546351	0.329087
Q64521	Glycerol-3-phosphate dehydrogenase, mitochondrial	Gpd2	-0.145072	-1.97572	0.0549722	0.329087
Q99NE5	Regulating synaptic membrane exocytosis protein 1	Rims1	-0.167696	-1.98015	0.0544531	0.329087
Q9D6Y9	1,4-alpha-glucan-branching enzyme	Gbe1	0.409365	1.98025	0.0544417	0.329087
Q9Z2C4	Myotubularin-related protein 1	Mtmr1	-0.182828	-1.97602	0.0549367	0.329087
P23818	Glutamate receptor 1	Gria1	-0.146022	-1.97395	0.0551798	0.329148
Q8K3H0	DCC-interacting protein 13-alpha	Appl1	-0.162823	-1.97445	0.0551205	0.329148
Q02248	Catenin beta-1	Ctnnb1	-0.130112	-1.97174	0.0554404	0.329603
Q9JKS5	Intracellular hyaluronan-binding protein 4	Habp4	-0.301174	-1.9719	0.0554214	0.329603
Q3V0Q1	Dynein heavy chain 12, axonemal	Dnah12	-0.502296	-1.9698	0.0556713	0.32988
Q6P4S6	Serine/threonine-protein kinase SIK3	Sik3	0.344931	1.97019	0.055625	0.32988
P62267	40S ribosomal protein S23	Rps23	0.491099	1.96737	0.0559603	0.331044
P24369	Peptidyl-prolyl cis-trans isomerase B	Ppib	0.198979	1.96442	0.0563126	0.331485
P62908	40S ribosomal protein S3	Rps3	0.114704	1.96509	0.0562322	0.331485
Q8BGC0	HIV Tat-specific factor 1 homolog	Htatsf1	0.185639	1.96514	0.0562269	0.331485
A2AHC3	Calmodulin-regulated spectrin-associated protein 1	Camsap1	-0.37654	-1.96069	0.0567622	0.332099
P61804	Dolichyl-diphosphooligosaccharide--protein glycosyltransferase subunit DAD1	Dad1	0.39539	1.95846	0.0570317	0.332099
Q80U40	RIMS-binding protein 2	Rimbp2	-0.182176	-1.96072	0.0567582	0.332099
Q80VP0	Tectonin beta-propeller repeat-containing protein 1	Tecpr1	-0.27577	-1.96017	0.056825	0.332099
Q922Q1	Mitochondrial amidoxime reducing component 2	2023-03-02	0.225743	1.95817	0.0570665	0.332099
Q9JHS3	Ragulator complex protein LAMTOR2	Lamtor2	0.341999	1.95869	0.0570041	0.332099
Q9QYI5	DnaJ homolog subfamily B member 2	Dnajb2	0.380975	1.96	0.0568454	0.332099
Q8VCR7	Alpha/beta hydrolase domain-containing protein 14B	Abhd14b	0.28895	1.95666	0.05725	0.332626
Q9ESJ4	NCK-interacting protein with SH3 domain	Nckipsd	-0.273476	-1.95371	0.0576103	0.334177
P48453;P48455	Serine/threonine-protein phosphatase 2B catalytic subunit beta isoform	Ppp3cb	-0.145725	-1.94776	0.0583422	0.3356
Q62095;Q61496	ATP-dependent RNA helicase DDX3Y	Ddx3y	-0.306822	-1.94969	0.0581043	0.3356
Q8K1J6	CCA tRNA nucleotidyltransferase 1, mitochondrial	Trnt1	-0.315995	-1.94935	0.0581457	0.3356
Q8R0Y6	Cytosolic 10-formyltetrahydrofolate dehydrogenase	Aldh1l1	0.169688	1.94714	0.0584183	0.3356
Q99JP0	Mitogen-activated protein kinase kinase kinase kinase 3	Map4k3	-0.342209	-1.94846	0.0582559	0.3356
Q9DBG5	Perilipin-3	Plin3	0.319805	1.95068	0.0579821	0.3356
A2AP18	1-phosphatidylinositol 4,5-bisphosphate phosphodiesterase eta-2	Plch2	0.451028	1.94183	0.0590797	0.336767
O35409	Glutamate carboxypeptidase 2	Folh1	0.325583	1.94192	0.0590675	0.336767
O54734	Dolichyl-diphosphooligosaccharide--protein glycosyltransferase 48 kDa subunit	Ddost	0.19726	1.94227	0.0590243	0.336767
Q5DTL9	Sodium-driven chloride bicarbonate exchanger	Slc4a10	-0.182106	-1.94173	0.0590918	0.336767
Q5XG69	Soluble lamin-associated protein of 75 kDa	Fam169a	-0.241881	-1.94202	0.0590559	0.336767
Q9JKK7;Q9JHJ0	Tropomodulin-2	Tmod2	-0.13867	-1.93824	0.0595302	0.338726
O35127	Protein C10	Grcc10	-0.334873	-1.93603	0.0598086	0.339527
Q61301	Catenin alpha-2	Ctnna2	-0.144172	-1.93448	0.0600042	0.339527
Q8R010	Aminoacyl tRNA synthase complex-interacting multifunctional protein 2	Aimp2	0.292524	1.93412	0.0600504	0.339527
Q9D8E6	60S ribosomal protein L4	Rpl4	0.168262	1.93554	0.0598708	0.339527
O88967	ATP-dependent zinc metalloprotease YME1L1	Yme1l1	0.259284	1.93014	0.0605568	0.340856
Q8BPE4	Transmembrane protein 177	Tmem177	-0.370508	-1.93039	0.060524	0.340856
Q9Z239	Phospholemman	Fxyd1	0.346032	1.93002	0.0605713	0.340856
P24668	Cation-dependent mannose-6-phosphate receptor	M6pr	0.191346	1.92751	0.0608936	0.342061
P42128	Forkhead box protein K1	Foxk1	-0.221743	-1.92616	0.0610658	0.342061
P84104	Serine/arginine-rich splicing factor 3	Srsf3	-0.235469	-1.92612	0.0610721	0.342061
P83870	PHD finger-like domain-containing protein 5A	Phf5a	-0.392899	-1.92461	0.0612661	0.342612
Q9ERE7	LDLR chaperone MESD	Mesdc2	0.35458	1.92342	0.0614194	0.342933
P70398	Probable ubiquitin carboxyl-terminal hydrolase FAF-X	Usp9x	-0.176095	-1.91468	0.0625578	0.348745
P47738;Q9JHW9	Aldehyde dehydrogenase, mitochondrial	Aldh2	-0.193564	-1.91292	0.0627894	0.348949
Q924M7	Mannose-6-phosphate isomerase	Mpi	-0.195117	-1.91365	0.062694	0.348949
Q3TW96	UDP-N-acetylhexosamine pyrophosphorylase-like protein 1	Uap1l1	0.358926	1.91212	0.0628946	0.348992
Q8BWM0	Prostaglandin E synthase 2;Prostaglandin E synthase 2 truncated form	Ptges2	0.273955	1.90825	0.0634072	0.351292
Q8VDM4	26S proteasome non-ATPase regulatory subunit 2	Psmd2	0.109471	1.90427	0.0639382	0.353686
O88910	MAGUK p55 subfamily member 3	Mpp3	-0.227552	-1.90313	0.0640904	0.353981
Q64345	Interferon-induced protein with tetratricopeptide repeats 3	Ifit3	1.1087	1.89983	0.0645345	0.35472
Q8CGV2	Tryptophan 5-hydroxylase 2	Tph2	-0.299178	-1.89919	0.0646207	0.35472
Q99104	Unconventional myosin-Va	Myo5a	-0.105822	-1.89922	0.0646165	0.35472
Q9QYF9	Protein NDRG3	Ndrg3	-0.161321	-1.90021	0.0644828	0.35472
Q80U49	Centrosomal protein of 170 kDa protein B	Cep170b	-0.256091	-1.89703	0.0649134	0.355644
Q9JKB1;P58321	Ubiquitin carboxyl-terminal hydrolase isozyme L3;Ubiquitin carboxyl-terminal hydrolase isozyme L4	Uchl3;Uchl4	-0.169843	-1.89648	0.0649878	0.355644
P07356	Annexin A2	Anxa2	0.555631	1.88985	0.0658923	0.355699
P15105	Glutamine synthetase	Glul	-0.245748	-1.89371	0.0653644	0.355699
P48428	Tubulin-specific chaperone A	Tbca	-0.379333	-1.89089	0.0657492	0.355699
P58021	Transmembrane 9 superfamily member 2	Tm9sf2	0.276256	1.89058	0.0657924	0.355699
Q6ZQ38	Cullin-associated NEDD8-dissociated protein 1	Cand1	-0.102476	-1.89443	0.0652659	0.355699
Q80Y17	Lethal(2) giant larvae protein homolog 1	Llgl1	0.214295	1.89153	0.0656619	0.355699
Q8BG51	Mitochondrial Rho GTPase 1	Rhot1	-0.177454	-1.89004	0.0658657	0.355699
Q8K273	Membrane magnesium transporter 1	Mmgt1	0.1658	1.89024	0.0658393	0.355699
Q9JHW4	Selenocysteine-specific elongation factor	Eefsec	0.397884	1.89003	0.0658682	0.355699
P28184	Metallothionein-3	Mt3	0.492883	1.88538	0.0665085	0.358485
P62702	40S ribosomal protein S4, X isoform	Rps4x	0.171895	1.8836	0.066755	0.358763
Q8BGS7	Choline/ethanolaminephosphotransferase 1	Cept1	0.307475	1.88323	0.0668062	0.358763
Q91VD9	NADH-ubiquinone oxidoreductase 75 kDa subunit, mitochondrial	Ndufs1	-0.0994403	-1.88212	0.0669611	0.358763
Q91YQ3	Cold shock domain-containing protein C2	Csdc2	0.505925	1.88222	0.0669468	0.358763
Q920N7	Synaptotagmin-12	Syt12	-0.246971	-1.87913	0.0673774	0.360454
P06330;P01757;P01756	Ig heavy chain V region AC38 205.12;Ig heavy chain V region J558;Ig heavy chain V region MOPC 104E		1.45609	1.87405	0.0680917	0.36087
P58281;P58682	Dynamin-like 120 kDa protein, mitochondrial;Dynamin-like 120 kDa protein, form S1	Opa1	-0.103339	-1.87601	0.0678152	0.36087
Q7TQI3	Ubiquitin thioesterase OTUB1	Otub1	-0.133439	-1.87592	0.0678287	0.36087
Q8R5H6	Wiskott-Aldrich syndrome protein family member 1	Wasf1	-0.156642	-1.87537	0.0679058	0.36087
Q91WG4	Elongator complex protein 2	Elp2	-0.242021	-1.87364	0.0681502	0.36087
Q9Z0N1	Eukaryotic translation initiation factor 2 subunit 3, X-linked	Eif2s3x	0.198476	1.87356	0.068161	0.36087
Q9Z1D1	Eukaryotic translation initiation factor 3 subunit G	Eif3g	-0.33805	-1.87563	0.0678686	0.36087
E9Q3L2		Pi4ka	-0.146302	-1.87063	0.0685756	0.361461
Q6P5E4	UDP-glucose:glycoprotein glucosyltransferase 1	Uggt1	0.197762	1.87148	0.068455	0.361461
Q7M6Y3	Phosphatidylinositol-binding clathrin assembly protein	Picalm	0.2936	1.87081	0.068551	0.361461
Q3UKJ7	WD40 repeat-containing protein SMU1;WD40 repeat-containing protein SMU1, N-terminally processed	Smu1	0.625826	1.86977	0.0686984	0.361576
Q9CS84;P0DI97	Neurexin-1	Nrxn1	0.17444	1.86832	0.0689048	0.361599
Q9ES97	Reticulon-3	Rtn3	-0.117276	-1.86884	0.0688316	0.361599
O88703	Potassium/sodium hyperpolarization-activated cyclic nucleotide-gated channel 2	Hcn2	0.398563	1.86467	0.0694278	0.363205
Q80Y86	Mitogen-activated protein kinase 15	Mapk15	-0.257736	-1.86502	0.0693766	0.363205
Q9CQJ8	NADH dehydrogenase [ubiquinone] 1 beta subcomplex subunit 9	Ndufb9	-0.265502	-1.86406	0.0695153	0.363205
P50114	Protein S100-B	S100b	0.335031	1.86249	0.0697401	0.363318
Q9DCZ4	Apolipoprotein O	Apoo	-0.161103	-1.86257	0.0697294	0.363318
P15864;Q07133	Histone H1.2	Hist1h1c	0.403718	1.85941	0.0701852	0.363912
P61922	4-aminobutyrate aminotransferase, mitochondrial	Abat	-0.13968	-1.85968	0.0701464	0.363912
Q05909	Receptor-type tyrosine-protein phosphatase gamma	Ptprg	0.293369	1.85993	0.0701109	0.363912
Q9Z1J3	Cysteine desulfurase, mitochondrial	Nfs1	-0.322211	-1.85889	0.0702608	0.363912
P62855	40S ribosomal protein S26	Rps26	0.198828	1.85552	0.0707505	0.365919
P07901	Heat shock protein HSP 90-alpha	Hsp90aa1	0.139259	1.8541	0.0709591	0.36594
P97445	Voltage-dependent P/Q-type calcium channel subunit alpha-1A	Cacna1a	-0.340157	-1.85468	0.0708742	0.36594
P70663	SPARC-like protein 1	Sparcl1	0.222118	1.85133	0.0713646	0.367502
O35295	Transcriptional activator protein Pur-beta	Purb	-0.171009	-1.84763	0.0719099	0.368603
P08249	Malate dehydrogenase, mitochondrial	Mdh2	-0.0975301	-1.84692	0.0720157	0.368603
P48758	Carbonyl reductase [NADPH] 1	Cbr1	-0.134299	-1.84842	0.0717927	0.368603
Q5U4E0	Lipoma HMGIC fusion partner-like 4 protein	Lhfpl4	-0.609755	-1.84572	0.0721932	0.368603
Q8R146	Acylamino-acid-releasing enzyme	Apeh	0.506053	1.84795	0.0718629	0.368603
Q99L13	3-hydroxyisobutyrate dehydrogenase, mitochondrial	Hibadh	0.232027	1.8457	0.0721963	0.368603
Q6Q477	Calcium-transporting ATPase	Atp2b4	-0.327563	-1.84353	0.0725178	0.369191
Q8CIE6	Coatomer subunit alpha;Xenin;Proxenin	Copa	0.163382	1.84368	0.0724959	0.369191
Q91W50	Cold shock domain-containing protein E1	Csde1	0.177458	1.84253	0.0726678	0.369429
Q9CZ42	ATP-dependent (S)-NAD(P)H-hydrate dehydratase	Carkd	-0.145319	-1.84059	0.0729568	0.370372
O35083	1-acyl-sn-glycerol-3-phosphate acyltransferase alpha	Agpat1	0.34819	1.83448	0.0738766	0.371354
Q3U4G3	Xyloside xylosyltransferase 1	Xxylt1	0.588894	1.837	0.073497	0.371354
Q7TQF7	Amphiphysin	Amph	-0.143219	-1.83471	0.0738425	0.371354
Q8CHT1	Ephexin-1	Ngef	-0.364317	-1.83541	0.0737371	0.371354
Q8K310	Matrin-3	Matr3	-0.130858	-1.83516	0.0737737	0.371354
Q99NB1	Acetyl-coenzyme A synthetase 2-like, mitochondrial	Acss1	-0.256994	-1.83783	0.0733715	0.371354
Q9JKC8	AP-3 complex subunit mu-1	Ap3m1	0.602013	1.83571	0.0736918	0.371354
P19253	60S ribosomal protein L13a	Rpl13a	0.285464	1.83336	0.0740468	0.371688
P61222	ATP-binding cassette sub-family E member 1	Abce1	0.26915	1.83145	0.074337	0.372622
Q9QZB0	Regulator of G-protein signaling 17	Rgs17	-0.346224	-1.83054	0.0744752	0.372793
P06728	Apolipoprotein A-IV	Apoa4	0.445986	1.82748	0.0749432	0.373045
P12960	Contactin-1	Cntn1	-0.112561	-1.82764	0.0749188	0.373045
P33173	Kinesin-like protein KIF1A	Kif1a	0.154023	1.82808	0.0748515	0.373045
Q80XI4	Phosphatidylinositol 5-phosphate 4-kinase type-2 beta	Pip4k2b	-0.133158	-1.8268	0.0750468	0.373045
Q91VW3	SH3 domain-binding glutamic acid-rich-like protein 3	Sh3bgrl3	0.307182	1.82817	0.0748374	0.373045
Q9CYR6	Phosphoacetylglucosamine mutase	Pgm3	-0.346169	-1.82481	0.0753533	0.374049
Q8BZ98	Dynamin-3	Dnm3	-0.108546	-1.82306	0.0756225	0.374865
Q8K394	Inactive phospholipase C-like protein 2	Plcl2	-0.532819	-1.82143	0.0758748	0.375596
Q8K183	Pyridoxal kinase	Pdxk	-0.38835	-1.82026	0.0760547	0.375966
A2AQ07	Tubulin beta-1 chain	Tubb1	0.718864	1.81813	0.0763864	0.376566
Q3TDK6	Protein rogdi homolog	Rogdi	-0.136563	-1.81822	0.0763727	0.376566
Q9CR68	Cytochrome b-c1 complex subunit Rieske, mitochondrial;Cytochrome b-c1 complex subunit 11	Uqcrfs1	-0.162163	-1.81522	0.0768403	0.378283
O08917	Flotillin-1	Flot1	0.190873	1.81093	0.0775144	0.380033
O70228	Probable phospholipid-transporting ATPase IIA	Atp9a	0.299767	1.8122	0.0773146	0.380033
P17427	AP-2 complex subunit alpha-2	Ap2a2	-0.0926469	-1.81127	0.07746	0.380033
Q64331	Unconventional myosin-VI	Myo6	0.264771	1.80967	0.0777135	0.380166
Q8CI61	BAG family molecular chaperone regulator 4	Bag4	-0.233538	-1.80941	0.077754	0.380166
Q9DBE8	Alpha-1,3/1,6-mannosyltransferase ALG2	Alg2	-0.125505	-1.80447	0.0785379	0.383475
Q9WV54	Acid ceramidase;Acid ceramidase subunit alpha;Acid ceramidase subunit beta	Asah1	0.228622	1.80255	0.0788438	0.384444
P62878	E3 ubiquitin-protein ligase RBX1;E3 ubiquitin-protein ligase RBX1, N-terminally processed	Rbx1	-0.161518	-1.79992	0.0792661	0.385209
Q8BH55	Threonine synthase-like 1	Thnsl1	-0.325216	-1.80055	0.0791643	0.385209
Q9CXJ4	ATP-binding cassette sub-family B member 8, mitochondrial	Abcb8	0.260825	1.79956	0.0793236	0.385209
P63085	Mitogen-activated protein kinase 1	Mapk1	-0.150461	-1.79816	0.0795479	0.385364
Q80UJ7	Rab3 GTPase-activating protein catalytic subunit	Rab3gap1	-0.219098	-1.79802	0.0795709	0.385364
O35681;Q9R0N9	Synaptotagmin-3	Syt3	-0.228226	-1.794	0.0802205	0.38694
Q9CQZ6	NADH dehydrogenase [ubiquinone] 1 beta subcomplex subunit 3	Ndufb3	-0.258029	-1.79413	0.0802006	0.38694
Q9D8U8	Sorting nexin-5	Snx5	0.243207	1.79424	0.0801815	0.38694
P63328	Serine/threonine-protein phosphatase 2B catalytic subunit alpha isoform	Ppp3ca	-0.128788	-1.79025	0.0808312	0.389317
Q9DB41	Mitochondrial glutamate carrier 2	Slc25a18	-0.208612	-1.78964	0.0809309	0.389317
P70333	Heterogeneous nuclear ribonucleoprotein H2	Hnrnph2	-0.128789	-1.78774	0.0812422	0.39029
P62812	Gamma-aminobutyric acid receptor subunit alpha-1	Gabra1	-0.167359	-1.78655	0.0814374	0.390703
Q9JHL1	Na(+)/H(+) exchange regulatory cofactor NHE-RF2	Slc9a3r2	-0.357369	-1.78492	0.0817051	0.391463
Q3UVL4	Vacuolar protein sorting-associated protein 51 homolog	Vps51	-0.181221	-1.78408	0.0818438	0.391603
Q91W39	Nuclear receptor coactivator 5	Ncoa5	-0.343948	-1.78115	0.0823292	0.392875
Q9Z0E6	Interferon-induced guanylate-binding protein 2	Gbp2	1.7559	1.78153	0.082265	0.392875
Q6PIC6	Sodium/potassium-transporting ATPase subunit alpha-3	Atp1a3	-0.109617	-1.78039	0.0824547	0.39295
P09055	Integrin beta-1	Itgb1	0.257746	1.77858	0.0827559	0.393338
Q8BNU0	Armadillo repeat-containing protein 6	Armc6	0.274346	1.77859	0.0827545	0.393338
P51880	Fatty acid-binding protein, brain	Fabp7	0.255192	1.77333	0.0836334	0.396323
Q9ET22	Dipeptidyl peptidase 2	Dpp7	0.29818	1.77284	0.0837162	0.396323
Q9QZB7	Actin-related protein 10	Actr10	-0.157492	-1.77329	0.0836398	0.396323
Q9CPU0	Lactoylglutathione lyase	Glo1	-0.210107	-1.77027	0.0841489	0.397845
O09172	Glutamate--cysteine ligase regulatory subunit	Gclm	-0.54669	-1.76652	0.0847849	0.397896
O35737	Heterogeneous nuclear ribonucleoprotein H;Heterogeneous nuclear ribonucleoprotein H, N-terminally processed	Hnrnph1	-0.231851	-1.76731	0.0846508	0.397896
P31650;P31649;O35316;Q8VBW1;Q61327;O55192;P31651	Sodium- and chloride-dependent GABA transporter 3	Slc6a11	-0.193346	-1.76646	0.0847948	0.397896
Q6P1B1	Xaa-Pro aminopeptidase 1	Xpnpep1	-0.126042	-1.76831	0.0844807	0.397896
Q9CQY6	Ubiquinol-cytochrome-c reductase complex assembly factor 2	Uqcc2	-0.198157	-1.76831	0.0844813	0.397896
Q9WV02	RNA-binding motif protein, X chromosome;RNA-binding motif protein, X chromosome, N-terminally processed	Rbmx	-0.181637	-1.76627	0.0848266	0.397896
P11404	Fatty acid-binding protein, heart	Fabp3	-0.355166	-1.76401	0.0852114	0.398656
Q9QYX7	Protein piccolo	Pclo	-0.137422	-1.7642	0.0851796	0.398656
P11352	Glutathione peroxidase 1	Gpx1	0.21634	1.76264	0.0854464	0.399233
Q91ZH7	Phospholipase ABHD3	Abhd3	0.278282	1.75614	0.0865642	0.403467
Q9R099	Transducin beta-like protein 2	Tbl2	0.261113	1.75606	0.0865781	0.403467
P56382	ATP synthase subunit epsilon, mitochondrial	Atp5e	-0.452552	-1.75508	0.0867483	0.403735
Q9QUH0	Glutaredoxin-1	Glrx	-0.19346	-1.75342	0.0870354	0.404545
P50544	Very long-chain specific acyl-CoA dehydrogenase, mitochondrial	Acadvl	-0.166447	-1.75196	0.0872895	0.4052
Q91YP0	L-2-hydroxyglutarate dehydrogenase, mitochondrial	L2hgdh	-0.255934	-1.75095	0.0874649	0.405488
P61759	Prefoldin subunit 3	Vbp1	0.316602	1.75007	0.0876187	0.405676
Q60963	Platelet-activating factor acetylhydrolase	Pla2g7	0.298486	1.74744	0.0880787	0.407278
Q61553	Fascin	Fscn1	-0.131793	-1.74648	0.0882479	0.407534
O55125	Protein NipSnap homolog 1	Nipsnap1	-0.227586	-1.74434	0.0886245	0.40822
Q8R4N0	Citrate lyase subunit beta-like protein, mitochondrial	Clybl	-0.336756	-1.74489	0.0885275	0.40822
Q9R111	Guanine deaminase	Gda	-0.117881	-1.74313	0.0888385	0.40868
Q811D0	Disks large homolog 1	Dlg1	-0.130668	-1.73762	0.0898168	0.411331
Q8BXZ1	Protein disulfide-isomerase TMX3	Tmx3	0.213259	1.7373	0.0898745	0.411331
Q920P5	Adenylate kinase isoenzyme 5	Ak5	-0.148382	-1.73821	0.0897107	0.411331
Q921F4	Heterogeneous nuclear ribonucleoprotein L-like	Hnrnpll	-0.19971	-1.73915	0.089545	0.411331
P61079;P62838;Q6ZWY6;P61080	Ubiquitin-conjugating enzyme E2 D3;Ubiquitin-conjugating enzyme E2 D2;Ubiquitin-conjugating enzyme E2 D2B;Ubiquitin-conjugating enzyme E2 D1	Ube2d3;Ube2d2;Ube2d2b;Ube2d1	0.305685	1.73599	0.0901076	0.411346
Q9CZB0	Succinate dehydrogenase cytochrome b560 subunit, mitochondrial	Sdhc	-0.451494	-1.73645	0.0900253	0.411346
Q91X97	Neurocalcin-delta	Ncald	-0.214037	-1.7339	0.0904827	0.411512
Q9D415	Disks large-associated protein 1	Dlgap1	-0.184411	-1.73486	0.0903106	0.411512
Q9DCT8	Cysteine-rich protein 2	Crip2	-0.158473	-1.73386	0.090489	0.411512
Q8BYI8	Uncharacterized protein KIAA1467	Kiaa1467	0.235888	1.73296	0.090651	0.411726
Q920Q4	Vacuolar protein sorting-associated protein 16 homolog	Vps16	0.244316	1.72986	0.0912102	0.413741
Q9WTP6	Adenylate kinase 2, mitochondrial;Adenylate kinase 2, mitochondrial, N-terminally processed	Ak2	0.249326	1.72814	0.0915199	0.41462
Q62448	Eukaryotic translation initiation factor 4 gamma 2	Eif4g2	0.293299	1.72643	0.091831	0.415472
Q99JY0	Trifunctional enzyme subunit beta, mitochondrial;3-ketoacyl-CoA thiolase	Hadhb	0.116546	1.72519	0.0920562	0.415472
Q9D0F3	Protein ERGIC-53	Lman1	0.412897	1.72579	0.0919473	0.415472
Q8CFV4	Neuritin	Nrn1	-0.240528	-1.72311	0.0924359	0.41666
Q9WV85	Nucleoside diphosphate kinase 3	Nme3	-0.358302	-1.72212	0.0926167	0.41695
Q91W52	Transmembrane protein 19	Tmem19	0.230285	1.71721	0.0935191	0.420483
Q8R5M8	Cell adhesion molecule 1	Cadm1	-0.146945	-1.71653	0.0936448	0.42052
P08122	Collagen alpha-2(IV) chain;Canstatin	Col4a2	0.439558	1.70856	0.0951253	0.422461
P20444	Protein kinase C alpha type	Prkca	-0.171423	-1.70951	0.0949475	0.422461
P70429	Ena/VASP-like protein	Evl	0.418383	1.70935	0.0949787	0.422461
Q61831	Mitogen-activated protein kinase 10	Mapk10	-0.280972	-1.71056	0.0947516	0.422461
Q8BSZ2	AP-3 complex subunit sigma-2	Ap3s2	0.408879	1.70904	0.0950357	0.422461
Q8VCN5	Cystathionine gamma-lyase	Cth	-0.21453	-1.70911	0.0950226	0.422461
Q9CR61	NADH dehydrogenase [ubiquinone] 1 beta subcomplex subunit 7	Ndufb7	-0.179969	-1.70978	0.0948981	0.422461
Q9R0Q3	Transmembrane emp24 domain-containing protein 2	Tmed2	0.59026	1.71302	0.0942947	0.422461
Q9Z1Z2	Serine-threonine kinase receptor-associated protein	Strap	0.172526	1.70849	0.0951392	0.422461
O08688	Calpain-5	Capn5	-0.261771	-1.70413	0.0959579	0.424151
P09470	Angiotensin-converting enzyme;Angiotensin-converting enzyme, soluble form	Ace	-0.971711	-1.70394	0.0959939	0.424151
Q8BL95	UPF0769 protein C21orf59 homolog		-0.196886	-1.70496	0.0958013	0.424151
Q9DCW4	Electron transfer flavoprotein subunit beta	Etfb	-0.120863	-1.70439	0.0959082	0.424151
Q62419	Endophilin-A2	Sh3gl1	-0.201731	-1.70277	0.0962141	0.42446
Q80UM3	N-alpha-acetyltransferase 15, NatA auxiliary subunit	Naa15	0.247325	1.70127	0.0964967	0.42446
Q9DB05	Alpha-soluble NSF attachment protein	Napa	-0.134001	-1.70105	0.0965383	0.42446
Q9QZB9	Dynactin subunit 5	Dctn5	-0.415843	-1.70173	0.09641	0.42446
O54774	AP-3 complex subunit delta-1	Ap3d1	0.161979	1.69648	0.0974077	0.424974
P12367	cAMP-dependent protein kinase type II-alpha regulatory subunit	Prkar2a	-0.14306	-1.69354	0.0979706	0.424974
P35564	Calnexin	Canx	0.112243	1.6928	0.098112	0.424974
P35700	Peroxiredoxin-1	Prdx1	0.137906	1.69318	0.0980396	0.424974
Q80XI3	Eukaryotic translation initiation factor 4 gamma 3	Eif4g3	-0.231953	-1.69235	0.0981988	0.424974
Q80Y98	Phospholipase DDHD2	Ddhd2	0.35451	1.69489	0.0977115	0.424974
Q8C7R4	Ubiquitin-like modifier-activating enzyme 6	Uba6	-0.268987	-1.69737	0.0972372	0.424974
Q91ZJ5	UTP--glucose-1-phosphate uridylyltransferase	Ugp2	0.136373	1.69541	0.0976115	0.424974
Q99K28	ADP-ribosylation factor GTPase-activating protein 2	Arfgap2	-0.296909	-1.69783	0.0971506	0.424974
Q9EQK5	Major vault protein	Mvp	0.335643	1.69472	0.0977449	0.424974
Q9R069	Basal cell adhesion molecule	Bcam	-0.245192	-1.69442	0.0978021	0.424974
Q9R0Q6	Actin-related protein 2/3 complex subunit 1A	Arpc1a	-0.125224	-1.69537	0.097619	0.424974
Q9WUB3	Glycogen phosphorylase, muscle form	Pygm	-0.19017	-1.69963	0.0968084	0.424974
P56212	cAMP-regulated phosphoprotein 19	Arpp19	-0.409927	-1.69066	0.0985239	0.425866
Q8CHU3	Epsin-2	Epn2	-0.211423	-1.68872	0.0988987	0.426808
Q91X72	Hemopexin	Hpx	1.3587	1.68829	0.0989802	0.426808
P47941	Crk-like protein	Crkl	0.292844	1.68716	0.0992003	0.427242
P32883	GTPase KRas;GTPase KRas, N-terminally processed	Kras	-0.338937	-1.6858	0.0994633	0.42786
P54071	Isocitrate dehydrogenase [NADP], mitochondrial	Idh2	-0.160891	-1.68518	0.0995846	0.427867
Q9EPJ9	ADP-ribosylation factor GTPase-activating protein 1	Arfgap1	-0.152698	-1.68442	0.0997309	0.427982
Q9D906	Ubiquitin-like modifier-activating enzyme ATG7	Atg7	0.124125	1.68231	0.100142	0.429233
P40240	CD9 antigen	Cd9	0.238444	1.68074	0.100449	0.429776
Q5U5Q9	BRCA1-A complex subunit RAP80	Uimc1	-0.247182	-1.68044	0.100509	0.429776
Q8BW96	Calcium/calmodulin-dependent protein kinase type 1D	Camk1d	-0.172174	-1.67762	0.101062	0.430641
Q91VR2	ATP synthase subunit gamma, mitochondrial	Atp5c1	-0.139142	-1.67852	0.100886	0.430641
Q91WC3	Long-chain-fatty-acid--CoA ligase 6	Acsl6	-0.139226	-1.67757	0.101072	0.430641
P39053	Dynamin-1	Dnm1	-0.0917352	-1.6769	0.101204	0.430687
Q6PB66	Leucine-rich PPR motif-containing protein, mitochondrial	Lrpprc	-0.15359	-1.67488	0.101603	0.431871
P09242	Alkaline phosphatase, tissue-nonspecific isozyme	Alpl	0.406567	1.67362	0.10185	0.432037
P58771	Tropomyosin alpha-1 chain	Tpm1	-0.201143	-1.67346	0.101883	0.432037
Q9D172	ES1 protein homolog, mitochondrial	D10Jhu81e	-0.137975	-1.67215	0.102143	0.432628
P0DM40	Fer-1-like protein 5	Fer1l5	0.25292	1.67016	0.102537	0.433669
P68033;P68134	Actin, alpha cardiac muscle 1;Actin, alpha skeletal muscle	Actc1;Acta1	-0.281294	-1.66908	0.102753	0.433669
Q8R0S2	IQ motif and SEC7 domain-containing protein 1	Iqsec1	-0.173341	-1.66944	0.102681	0.433669
Q99JR5	Tubulointerstitial nephritis antigen-like	Tinagl1	-0.343802	-1.66628	0.103313	0.435521
P14206	40S ribosomal protein SA	Rpsa	0.123814	1.66279	0.104013	0.43677
P61961	Ubiquitin-fold modifier 1	Ufm1	0.239633	1.66238	0.104097	0.43677
Q8CDG3	Deubiquitinating protein VCIP135	Vcpip1	0.264565	1.66311	0.103949	0.43677
Q9DBH5	Vesicular integral-membrane protein VIP36	Lman2	0.222801	1.66243	0.104086	0.43677
Q9JJ69	Kv channel-interacting protein 2	Kcnip2	-0.266196	-1.66062	0.104452	0.437232
Q9QZ88	Vacuolar protein sorting-associated protein 29	Vps29	0.168373	1.6607	0.104436	0.437232
Q9QYJ3	DnaJ homolog subfamily B member 1	Dnajb1	-0.28056	-1.65697	0.105192	0.439815
Q8R3Z5	Voltage-dependent L-type calcium channel subunit beta-1	Cacnb1	-0.179003	-1.65541	0.10551	0.440575
Q99LC3	NADH dehydrogenase [ubiquinone] 1 alpha subcomplex subunit 10, mitochondrial	Ndufa10	-0.124513	-1.65487	0.10562	0.440575
P62814	V-type proton ATPase subunit B, brain isoform	Atp6v1b2	-0.0855037	-1.65156	0.106297	0.44154
P62900	60S ribosomal protein L31	Rpl31	0.244276	1.65132	0.106345	0.44154
Q8R4H2	Rho guanine nucleotide exchange factor 12	Arhgef12	-0.26974	-1.65207	0.106192	0.44154
Q9R1J0	Sterol-4-alpha-carboxylate 3-dehydrogenase, decarboxylating	Nsdhl	0.395611	1.65225	0.106156	0.44154
O88543	COP9 signalosome complex subunit 3	Cops3	0.319068	1.6502	0.106575	0.441984
Q6NTA4;Q80X95	Ras-related GTP-binding protein B;Ras-related GTP-binding protein A	Rragb;Rraga	0.390819	1.64887	0.106849	0.442607
Q3TCN2	Putative phospholipase B-like 2;Putative phospholipase B-like 2 28 kDa form;Putative phospholipase B-like 2 40 kDa form;Putative phospholipase B-like 2 15 kDa form	Plbd2	0.360191	1.64799	0.107029	0.442842
Q3UH99	Protein shisa-6 homolog	Shisa6	-0.384667	-1.64664	0.107309	0.442975
Q8VEM8	Phosphate carrier protein, mitochondrial	Slc25a3	-0.131041	-1.64684	0.107267	0.442975
Q6PEB6	MOB-like protein phocein	Mob4	-0.235816	-1.64519	0.107609	0.443437
Q9D8Y0	EF-hand domain-containing protein D2	Efhd2	0.284969	1.6449	0.107669	0.443437
Q8BTH8	Casein kinase I isoform gamma-1	Csnk1g1	-0.211614	-1.64402	0.107851	0.443676
Q3UUG6	TBC1 domain family member 24	Tbc1d24	-0.348828	-1.64209	0.108254	0.444311
Q6NVF9	Cleavage and polyadenylation specificity factor subunit 6	Cpsf6	0.217338	1.64255	0.108158	0.444311
Q8BGD8	Cytochrome c oxidase assembly factor 6 homolog	Coa6	-0.237179	-1.64117	0.108445	0.444589
Q3TES0	IQ motif and SEC7 domain-containing protein 3	Iqsec3	-0.346357	-1.63885	0.10893	0.445289
Q91V14;Q9WVL3	Solute carrier family 12 member 5	Slc12a5	-0.131722	-1.63944	0.108805	0.445289
Q9D924	Iron-sulfur cluster assembly 1 homolog, mitochondrial	Isca1	-0.243941	-1.63856	0.108989	0.445289
P35922	Fragile X mental retardation protein 1 homolog	Fmr1	0.228909	1.63791	0.109126	0.445338
O70161;P70181	Phosphatidylinositol 4-phosphate 5-kinase type-1 gamma	Pip5k1c	-0.142653	-1.63519	0.109697	0.44665
P08775	DNA-directed RNA polymerase II subunit RPB1	Polr2a	0.482657	1.63528	0.109677	0.44665
P43006	Excitatory amino acid transporter 2	Slc1a2	-0.109881	-1.63458	0.109825	0.446664
Q569Z6	Thyroid hormone receptor-associated protein 3	Thrap3	-0.323541	-1.63224	0.110318	0.447053
Q63959;Q14B80;Q8R1C0	Potassium voltage-gated channel subfamily C member 3	Kcnc3	0.323258	1.63293	0.110174	0.447053
Q6PE15	Mycophenolic acid acyl-glucuronide esterase, mitochondrial	Abhd10	0.228028	1.63176	0.110421	0.447053
Q8K341	Alpha-tubulin N-acetyltransferase 1	Atat1	-0.201031	-1.63192	0.110388	0.447053
Q810A7	ATP-dependent RNA helicase DDX42	Ddx42	-0.352432	-1.63011	0.11077	0.447457
Q9QZ73	DCN1-like protein 1	Dcun1d1	-0.176761	-1.63024	0.110742	0.447457
Q61074	Protein phosphatase 1G	Ppm1g	0.222352	1.62947	0.110906	0.447501
Q8CGA0	Protein phosphatase 1F	Ppm1f	0.24071	1.62827	0.11116	0.448021
E9QAT4		Sec16a	0.282473	1.62572	0.111704	0.4492
Q8VHC3	Selenoprotein M	Selm	0.338214	1.6259	0.111667	0.4492
Q9CRB0	Sorting nexin-24	Snx24	-0.404221	-1.62511	0.111834	0.449219
P26040	Ezrin	Ezr	0.186953	1.62347	0.112187	0.45013
Q9CQP2	Trafficking protein particle complex subunit 2	Trappc2	0.417486	1.62287	0.112314	0.450137
Q9Z0R4;CON__ENSEMBL:ENSBTAP00000001528	Intersectin-1	Itsn1	-0.109587	-1.62131	0.112651	0.45098
Q8C8N2	Protein SCAI	Scai	-0.196926	-1.62063	0.112795	0.451055
P01868;P01869	Ig gamma-1 chain C region secreted form;Ig gamma-1 chain C region, membrane-bound form	Ighg1	0.829193	1.61388	0.114257	0.452169
P14211	Calreticulin	Calr	0.13711	1.61367	0.114303	0.452169
P29758	Ornithine aminotransferase, mitochondrial	Oat	0.142241	1.61252	0.114553	0.452169
P47962	60S ribosomal protein L5	Rpl5	-0.275667	-1.61364	0.114309	0.452169
P51906	Excitatory amino acid transporter 3	Slc1a1	0.285989	1.61119	0.114843	0.452169
Q5M8N0	CB1 cannabinoid receptor-interacting protein 1	Cnrip1	-0.13363	-1.61148	0.114779	0.452169
Q80Z38	SH3 and multiple ankyrin repeat domains protein 2	Shank2	-0.150168	-1.61691	0.113599	0.452169
Q8BK30	NADH dehydrogenase [ubiquinone] flavoprotein 3, mitochondrial	Ndufv3	-0.163544	-1.61363	0.114312	0.452169
Q8BXC6	COMM domain-containing protein 2	Commd2	-0.279316	-1.61648	0.113692	0.452169
Q8C0Q9	Rap guanine nucleotide exchange factor 5	Rapgef5	-0.322095	-1.61138	0.114802	0.452169
Q99JW2	Aminoacylase-1	Acy1	0.424246	1.61581	0.113838	0.452169
Q99N28	Cell adhesion molecule 3	Cadm3	-0.12957	-1.6121	0.114645	0.452169
Q9CPT4	Myeloid-derived growth factor	Mydgf	0.269392	1.6135	0.11434	0.452169
Q9D6Z1	Nucleolar protein 56	Nop56	0.322952	1.61572	0.113858	0.452169
Q8K274	Ketosamine-3-kinase	Fn3krp	-0.241027	-1.61059	0.114975	0.452192
P35293	Ras-related protein Rab-18	Rab18	-0.136978	-1.60898	0.115328	0.453082
P28271	Cytoplasmic aconitate hydratase	Aco1	0.136208	1.60779	0.115588	0.453198
Q8R0S4	Voltage-dependent L-type calcium channel subunit beta-4	Cacnb4	-0.152761	-1.60769	0.11561	0.453198
O54833	Casein kinase II subunit alpha	Csnk2a2	-0.183793	-1.606	0.115982	0.453247
P17879	Heat shock 70 kDa protein 1B	Hspa1b	-0.279725	-1.60642	0.11589	0.453247
Q6PDQ2	Chromodomain-helicase-DNA-binding protein 4	Chd4	0.251881	1.60476	0.116256	0.453247
Q91X96	Guanine nucleotide exchange factor MSS4	Rabif	-0.203481	-1.60513	0.116174	0.453247
Q9CZD3	Glycine--tRNA ligase	Gars	0.136956	1.60479	0.116248	0.453247
O35609	Secretory carrier-associated membrane protein 3	Scamp3	0.179884	1.60198	0.11687	0.453666
P26369	Splicing factor U2AF 65 kDa subunit	U2af2	0.177573	1.60198	0.116871	0.453666
P97825	Hematological and neurological expressed 1 protein;Hematological and neurological expressed 1 protein, N-terminally processed	Hn1	-0.190803	-1.60294	0.116657	0.453666
Q6P5F7	Protein tweety homolog 3	Ttyh3	0.519249	1.60208	0.116848	0.453666
Q8BZF8	Phosphoglucomutase-like protein 5	Pgm5	0.245845	1.59515	0.118392	0.458081
Q8CCS6	Polyadenylate-binding protein 2	Pabpn1	0.321265	1.59563	0.118283	0.458081
Q9EPW0	Type I inositol 3,4-bisphosphate 4-phosphatase	Inpp4a	-0.14434	-1.59525	0.118369	0.458081
P31648	Sodium- and chloride-dependent GABA transporter 1	Slc6a1	-0.171093	-1.59293	0.11889	0.458957
P43406	Integrin alpha-V;Integrin alpha-V heavy chain;Integrin alpha-V light chain	Itgav	0.153125	1.59173	0.119159	0.458957
Q3TUH1	Phosphatidate cytidylyltransferase, mitochondrial	Tamm41	-0.354032	-1.59029	0.119484	0.458957
Q61292	Laminin subunit beta-2	Lamb2	-0.264764	-1.59182	0.119139	0.458957
Q9CQJ6	Density-regulated protein	Denr	-0.227607	-1.59017	0.11951	0.458957
Q9CZW5	Mitochondrial import receptor subunit TOM70	Tomm70a	-0.123401	-1.59015	0.119516	0.458957
Q9Z218	Dipeptidyl aminopeptidase-like protein 6	Dpp6	-0.128286	-1.59293	0.118889	0.458957
P35803	Neuronal membrane glycoprotein M6-b	Gpm6b	-0.183216	-1.58757	0.120099	0.460702
P58252	Elongation factor 2	Eef2	0.0867914	1.58694	0.120241	0.460751
P62242	40S ribosomal protein S8	Rps8	0.13025	1.58615	0.120421	0.460947
Q62351	Transferrin receptor protein 1	Tfrc	0.226395	1.58488	0.120709	0.461556
Q9D0S9	Histidine triad nucleotide-binding protein 2, mitochondrial	Hint2	0.473795	1.58417	0.120871	0.461685
Q07813	Apoptosis regulator BAX	Bax	0.449493	1.58123	0.121543	0.463263
Q8JZS0	Protein lin-7 homolog A	Lin7a	-0.199733	-1.58135	0.121514	0.463263
Q3UHB1	5-nucleotidase domain-containing protein 3	Nt5dc3	-0.111696	-1.57832	0.12221	0.465307
Q9R1L5	Microtubule-associated serine/threonine-protein kinase 1	Mast1	-0.333693	-1.57671	0.122579	0.466218
Q6GQT9	Nodal modulator 1	Nomo1	0.243722	1.57588	0.122772	0.466454
Q8K157	Aldose 1-epimerase	Galm	0.34262	1.57517	0.122936	0.466504
Q99LB6	Methionine adenosyltransferase 2 subunit beta	Mat2b	-0.238358	-1.57413	0.123176	0.466504
Q9R0P5	Destrin	Dstn	-0.118548	-1.57455	0.123077	0.466504
P48771	Cytochrome c oxidase subunit 7A2, mitochondrial	Cox7a2	-0.300741	-1.57327	0.123374	0.466546
Q91VF2	Histamine N-methyltransferase	Hnmt	-0.325192	-1.57295	0.123448	0.466546
Q99KE1	NAD-dependent malic enzyme, mitochondrial	Me2	-0.172343	-1.57239	0.123578	0.466546
P57780	Alpha-actinin-4	Actn4	-0.112533	-1.57122	0.123849	0.466908
Q9Z130	Heterogeneous nuclear ribonucleoprotein D-like	Hnrnpdl	-0.142768	-1.57085	0.123935	0.466908
Q60790	Ras GTPase-activating protein 3	Rasa3	0.318156	1.56869	0.124438	0.467819
Q61990	Poly(rC)-binding protein 2	Pcbp2	0.117746	1.56901	0.124364	0.467819
Q04690	Neurofibromin	Nf1	-0.449138	-1.56678	0.124885	0.469005
P19783	Cytochrome c oxidase subunit 4 isoform 1, mitochondrial	Cox4i1	-0.125677	-1.56435	0.125454	0.469743
P68510	14-3-3 protein eta	Ywhah	0.141318	1.5652	0.125254	0.469743
Q9CXW3	Calcyclin-binding protein	Cacybp	0.162772	1.56426	0.125475	0.469743
P62748	Hippocalcin-like protein 1	Hpcal1	-0.238034	-1.56256	0.125874	0.470552
P70296;Q8VIN1	Phosphatidylethanolamine-binding protein 1;Hippocampal cholinergic neurostimulating peptide	Pebp1	-0.109317	-1.56179	0.126057	0.470552
Q8BHG2	UPF0587 protein C1orf123 homolog		-0.379701	-1.56111	0.126217	0.470552
Q9R1T4	Septin-6	2023-09-06	-0.157218	-1.56135	0.126161	0.470552
Q9D0T1	NHP2-like protein 1;NHP2-like protein 1, N-terminally processed	Nhp2l1	0.192668	1.5576	0.127048	0.472666
Q9JJZ2	Tubulin alpha-8 chain	Tuba8	0.27825	1.55791	0.126974	0.472666
Q9D898	Actin-related protein 2/3 complex subunit 5-like protein	Arpc5l	-0.163591	-1.55559	0.127525	0.473948
Q8CBY8	Dynactin subunit 4	Dctn4	0.133396	1.55431	0.127829	0.474584
P07309	Transthyretin	Ttr	-0.973579	-1.54375	0.130367	0.475073
P46097	Synaptotagmin-2	Syt2	-0.18385	-1.54774	0.129403	0.475073
P49442	Inositol polyphosphate 1-phosphatase	Inpp1	-0.163262	-1.54636	0.129736	0.475073
P62077	Mitochondrial import inner membrane translocase subunit Tim8 B	Timm8b	-0.254682	-1.54766	0.129421	0.475073
P62862	40S ribosomal protein S30	Fau	0.279284	1.54654	0.129691	0.475073
P70704	Phospholipid-transporting ATPase IA	Atp8a1	0.108071	1.55046	0.128748	0.475073
P97390	Vacuolar protein sorting-associated protein 45	Vps45	0.16107	1.55128	0.128553	0.475073
Q2M3X8	Phosphatase and actin regulator 1	Phactr1	-0.272593	-1.54689	0.129608	0.475073
Q61543	Golgi apparatus protein 1	Glg1	0.293424	1.55136	0.128533	0.475073
Q62165	Dystroglycan;Alpha-dystroglycan;Beta-dystroglycan	Dag1	0.234927	1.54327	0.130482	0.475073
Q64433	10 kDa heat shock protein, mitochondrial	Hspe1	0.166268	1.54561	0.129916	0.475073
Q7TPD3	Roundabout homolog 2	Robo2	-0.218998	-1.54357	0.130409	0.475073
Q80TL0	Protein phosphatase 1E	Ppm1e	-0.0983482	-1.54901	0.129096	0.475073
Q8C570	mRNA export factor	Rae1	0.30404	1.54762	0.12943	0.475073
Q922Q9	Chitinase domain-containing protein 1	Chid1	-0.301038	-1.55001	0.128857	0.475073
Q9CQH3	NADH dehydrogenase [ubiquinone] 1 beta subcomplex subunit 5, mitochondrial	Ndufb5	-0.1988	-1.54871	0.129168	0.475073
Q9DBJ1	Phosphoglycerate mutase 1	Pgam1	-0.0984478	-1.54987	0.128891	0.475073
Q9JLB0	MAGUK p55 subfamily member 6	Mpp6	-0.120566	-1.54534	0.12998	0.475073
Q9JLC8	Sacsin	Sacs	-0.256461	-1.54392	0.130323	0.475073
Q9CQA1	Trafficking protein particle complex subunit 5	Trappc5	0.346617	1.54186	0.130822	0.475494
Q9DBR3	Armadillo repeat-containing protein 8	Armc8	-0.514748	-1.54169	0.130864	0.475494
Q7TN99;Q812E0;Q7TN98	Cytoplasmic polyadenylation element-binding protein 3;Cytoplasmic polyadenylation element-binding protein 2;Cytoplasmic polyadenylation element-binding protein 4	Cpeb3;Cpeb2;Cpeb4	-0.295748	-1.54113	0.131001	0.475511
P01872	Ig mu chain C region	Ighm	1.23789	1.54051	0.131152	0.475553
Q4KML4	Costars family protein ABRACL	Abracl	-0.336648	-1.5389	0.131545	0.475553
Q61137	Astrotactin-1	Astn1	-0.150325	-1.53907	0.131503	0.475553
Q8BU30	Isoleucine--tRNA ligase, cytoplasmic	Iars	0.185464	1.53944	0.131413	0.475553
P16330	2,3-cyclic-nucleotide 3-phosphodiesterase	Cnp	-0.178147	-1.53761	0.13186	0.476211
P62918	60S ribosomal protein L8	Rpl8	0.233744	1.53697	0.132016	0.476294
Q8VCY8	Lipid phosphate phosphatase-related protein type 2	Lppr2	-0.230087	-1.53636	0.132165	0.476353
Q8BUV3	Gephyrin;Molybdopterin adenylyltransferase;Molybdopterin molybdenumtransferase	Gphn	-0.0927776	-1.53523	0.132441	0.476387
Q8CAQ8	MICOS complex subunit Mic60	Immt	-0.08446	-1.53575	0.132313	0.476387
E9Q6P5		Ttc7b	-0.158123	-1.53324	0.132929	0.476861
G5E8K5	Ankyrin-3	Ank3	-0.103147	-1.53277	0.133046	0.476861
Q7TSJ2	Microtubule-associated protein 6	Map6	-0.115584	-1.53253	0.133105	0.476861
Q9QZ06	Toll-interacting protein	Tollip	0.155862	1.53327	0.132921	0.476861
P63005	Platelet-activating factor acetylhydrolase IB subunit alpha	Pafah1b1	-0.110659	-1.53076	0.13354	0.477941
P50247	Adenosylhomocysteinase	Ahcy	-0.0890155	-1.52927	0.133908	0.478779
Q8R0F8	Acylpyruvase FAHD1, mitochondrial	Fahd1	-0.204519	-1.52761	0.134321	0.479776
Q9QXJ1	Amyloid beta A4 precursor protein-binding family B member 1	Apbb1	-0.296431	-1.52524	0.134909	0.481396
P28571	Sodium- and chloride-dependent glycine transporter 1	Slc6a9	0.196845	1.52371	0.135291	0.481435
P58389	Serine/threonine-protein phosphatase 2A activator	Ppp2r4	-0.116631	-1.52304	0.135458	0.481435
P63094;Q6R0H7	Guanine nucleotide-binding protein G(s) subunit alpha isoforms short;Guanine nucleotide-binding protein G(s) subunit alpha isoforms XLas	Gnas	-0.0902803	-1.5231	0.135443	0.481435
Q80UG2	Plexin-A4	Plxna4	-0.177114	-1.52444	0.135108	0.481435
Q9EQF6	Dihydropyrimidinase-related protein 5	Dpysl5	-0.137016	-1.51997	0.136226	0.483684
E9Q7X7		Nrxn2	0.284747	1.51609	0.137201	0.485738
Q8BPU7	Engulfment and cell motility protein 1	Elmo1	0.266496	1.51605	0.137212	0.485738
Q9DC33	High mobility group protein 20A	Hmg20a	-0.407703	-1.51646	0.137108	0.485738
Q61656	Probable ATP-dependent RNA helicase DDX5	Ddx5	-0.115663	-1.51526	0.137411	0.485961
P47708	Rabphilin-3A	Rph3a	-0.133517	-1.51252	0.138104	0.486847
Q80T41	Gamma-aminobutyric acid type B receptor subunit 2	Gabbr2	-0.139004	-1.51212	0.138205	0.486847
Q8CIM7	Cytochrome P450 2D26	Cyp2d26	0.21968	1.51309	0.137959	0.486847
Q8K019	Bcl-2-associated transcription factor 1	Bclaf1	0.429727	1.5129	0.138009	0.486847
P48962	ADP/ATP translocase 1	Slc25a4	-0.106888	-1.51002	0.13874	0.48825
P50516	V-type proton ATPase catalytic subunit A	Atp6v1a	-0.0870855	-1.50746	0.139391	0.488815
Q61147;CON__ENSEMBL:ENSBTAP00000031900	Ceruloplasmin	Cp	0.436349	1.50699	0.139512	0.488815
Q6NZB0	DnaJ homolog subfamily C member 8	Dnajc8	0.345404	1.50671	0.139583	0.488815
Q8VE88	Protein FAM114A2	Fam114a2	0.315254	1.50795	0.139266	0.488815
Q9WUA6	RAC-gamma serine/threonine-protein kinase	Akt3	-0.371239	-1.5078	0.139304	0.488815
Q3THS6	S-adenosylmethionine synthase isoform type-2	Mat2a	-0.135034	-1.50543	0.139912	0.489485
Q02357	Ankyrin-1	Ank1	-0.354569	-1.5042	0.140226	0.489678
Q8BKC5	Importin-5	Ipo5	0.12108	1.50362	0.140377	0.489678
Q8R307	Vacuolar protein sorting-associated protein 18 homolog	Vps18	0.387274	1.50372	0.140349	0.489678
P05201	Aspartate aminotransferase, cytoplasmic	Got1	-0.0996749	-1.50289	0.140563	0.489849
Q63810;Q63811	Calcineurin subunit B type 1	Ppp3r1	-0.0992521	-1.50129	0.140974	0.490804
Q80U56	Late secretory pathway protein AVL9 homolog	Avl9	-0.248198	-1.50023	0.141249	0.490983
Q8VC30	Bifunctional ATP-dependent dihydroxyacetone kinase/FAD-AMP lyase (cyclizing);ATP-dependent dihydroxyacetone kinase;FAD-AMP lyase (cyclizing)	Dak	0.414328	1.50003	0.1413	0.490983
Q8R1T1	Charged multivesicular body protein 7	Chmp7	0.569377	1.49912	0.141535	0.491324
Q9D0B6	Protein PBDC1	Pbdc1	-0.227068	-1.49417	0.142821	0.494825
Q9D1D4	Transmembrane emp24 domain-containing protein 10	Tmed10	0.229882	1.49452	0.142729	0.494825
A2A690	Protein TANC2	Tanc2	-0.26917	-1.48984	0.143952	0.496797
P43277	Histone H1.3	Hist1h1d	0.183898	1.49007	0.143892	0.496797
P48318	Glutamate decarboxylase 1	Gad1	-0.17185	-1.48934	0.144084	0.496797
Q8C5H8	NAD kinase 2, mitochondrial	Nadk2	0.279947	1.48986	0.143946	0.496797
Q9WTL7	Acyl-protein thioesterase 2	Lypla2	-0.333183	-1.48975	0.143976	0.496797
P35278	Ras-related protein Rab-5C	Rab5c	0.184113	1.48685	0.144737	0.498501
Q9R0Q7	Prostaglandin E synthase 3	Ptges3	0.204769	1.4864	0.144856	0.498501
P17710;O08528;Q91W97;Q3TRM8	Hexokinase-1	Hk1	-0.0747793	-1.48492	0.145246	0.499056
P61226	Ras-related protein Rap-2b	Rap2b	-0.120796	-1.48473	0.145296	0.499056
Q9JIS5	Synaptic vesicle glycoprotein 2A	Sv2a	-0.135803	-1.48079	0.14634	0.502158
P08030	Adenine phosphoribosyltransferase	Aprt	0.188185	1.48006	0.146532	0.502336
P54923	[Protein ADP-ribosylarginine] hydrolase	Adprh	-0.259564	-1.47935	0.146723	0.502508
E9PV24	Fibrinogen alpha chain;Fibrinopeptide A;Fibrinogen alpha chain	Fga	0.87249	1.4775	0.147214	0.502894
O08795	Glucosidase 2 subunit beta	Prkcsh	0.0943133	1.47734	0.147257	0.502894
Q8BJW6	Eukaryotic translation initiation factor 2A;Eukaryotic translation initiation factor 2A, N-terminally processed	Eif2a	-0.241227	-1.47824	0.147018	0.502894
O88322	Nidogen-2	Nid2	-0.329413	-1.47409	0.148127	0.504225
P60670	Nuclear protein localization protein 4 homolog	Nploc4	-0.153936	-1.47275	0.148486	0.504225
P62317	Small nuclear ribonucleoprotein Sm D2	Snrpd2	0.167325	1.47248	0.148559	0.504225
Q8BSS9	Liprin-alpha-2	Ppfia2	-0.196291	-1.47492	0.147903	0.504225
Q8VDQ8	NAD-dependent protein deacetylase sirtuin-2	Sirt2	-0.159011	-1.47244	0.14857	0.504225
Q9D8N2	Protein FAM45A	Fam45a	-0.327551	-1.47267	0.148507	0.504225
Q9DB77	Cytochrome b-c1 complex subunit 2, mitochondrial	Uqcrc2	-0.0916583	-1.4722	0.148633	0.504225
A2APY7	NADH dehydrogenase [ubiquinone] 1 alpha subcomplex assembly factor 5	Ndufaf5	-0.27658	-1.46903	0.149488	0.506414
Q91YW3	DnaJ homolog subfamily C member 3	Dnajc3	0.362689	1.46876	0.149561	0.506414
Q8JZQ9	Eukaryotic translation initiation factor 3 subunit B	Eif3b	0.177487	1.46225	0.151329	0.511917
Q9QX11	Cytohesin-1	Cyth1	1.24694	1.4612	0.151614	0.512394
Q8BM72	Heat shock 70 kDa protein 13	Hspa13	0.340611	1.46044	0.151821	0.51261
O88712	C-terminal-binding protein 1	Ctbp1	-0.145095	-1.45688	0.152798	0.514453
P70195	Proteasome subunit beta type-7	Psmb7	-0.165825	-1.45699	0.152767	0.514453
Q9DBP5	UMP-CMP kinase	Cmpk1	0.145025	1.45723	0.152703	0.514453
Q9JHK4	Geranylgeranyl transferase type-2 subunit alpha	Rabggta	0.170977	1.45498	0.153321	0.51531
Q9JIA1	Leucine-rich glioma-inactivated protein 1	Lgi1	-0.10127	-1.45491	0.15334	0.51531
Q8R326	Paraspeckle component 1	Pspc1	0.135137	1.4535	0.15373	0.515792
Q9D7B6	Isobutyryl-CoA dehydrogenase, mitochondrial	Acad8	-0.253685	-1.45334	0.153772	0.515792
P62996	Transformer-2 protein homolog beta	Tra2b	-0.232186	-1.45218	0.154094	0.515904
Q3UHK1	Proton myo-inositol cotransporter	Slc2a13	0.204596	1.45226	0.154071	0.515904
O89116	Vesicle transport through interaction with t-SNAREs homolog 1A	Vti1a	0.211499	1.44889	0.155005	0.518472
Q7TT50	Serine/threonine-protein kinase MRCK beta	Cdc42bpb	-0.200959	-1.44832	0.155164	0.518516
P62627	Dynein light chain roadblock-type 1	Dynlrb1	0.183069	1.447	0.155531	0.518776
Q9WVK4	EH domain-containing protein 1	Ehd1	-0.125941	-1.44728	0.155454	0.518776
P23242	Gap junction alpha-1 protein	Gja1	0.229375	1.44413	0.156334	0.519035
P23492	Purine nucleoside phosphorylase	Pnp	0.242926	1.44457	0.156209	0.519035
Q8BL65	Actin-binding LIM protein 2	Ablim2	-0.12626	-1.44581	0.155863	0.519035
Q8C522	Endonuclease domain-containing 1 protein	Endod1	-0.147675	-1.44498	0.156094	0.519035
Q9DCR2	AP-3 complex subunit sigma-1	Ap3s1	-0.236227	-1.44545	0.155963	0.519035
Q8BG32	26S proteasome non-ATPase regulatory subunit 11	Psmd11	0.221608	1.44332	0.156559	0.5193
P62500	TSC22 domain family protein 1	Tsc22d1	-0.145647	-1.44242	0.156811	0.519654
Q00896	Alpha-1-antitrypsin 1-3	Serpina1c	0.283727	1.44062	0.157318	0.520854
O88448	Kinesin light chain 2	Klc2	0.243614	1.43991	0.157517	0.52103
Q69ZU6	Thrombospondin type-1 domain-containing protein 7A	Thsd7a	0.267563	1.4357	0.158704	0.524471
Q8BFQ8	Parkinson disease 7 domain-containing protein 1	Pddc1	-0.183423	-1.4328	0.159528	0.526501
Q8CCN5	Breast carcinoma-amplified sequence 3 homolog	Bcas3	-0.122777	-1.43199	0.15976	0.526501
Q9D0E3	LysM and putative peptidoglycan-binding domain-containing protein 1	Lysmd1	-0.182936	-1.43232	0.159663	0.526501
P61021	Ras-related protein Rab-5B	Rab5b	0.200482	1.42813	0.160861	0.527031
Q3TCJ1	BRISC complex subunit Abro1	Fam175b	-0.214823	-1.42781	0.160951	0.527031
Q8K4F5	Alpha/beta hydrolase domain-containing protein 11	Abhd11	0.313123	1.42775	0.160969	0.527031
Q99KI0	Aconitate hydratase, mitochondrial	Aco2	-0.0734839	-1.42959	0.160441	0.527031
Q9D7N9	Adipocyte plasma membrane-associated protein	Apmap	-0.203758	-1.42999	0.160328	0.527031
Q9EQ80	NIF3-like protein 1	Nif3l1	0.282417	1.43021	0.160266	0.527031
Q9ERB0	Synaptosomal-associated protein 29	Snap29	-0.213805	-1.42805	0.160882	0.527031
Q9JI91	Alpha-actinin-2	Actn2	-0.15605	-1.4273	0.161099	0.527031
B1AY13	Ubiquitin carboxyl-terminal hydrolase 24	Usp24	-0.361387	-1.42514	0.161717	0.527126
P01027	Complement C3;Complement C3 beta chain;C3-beta-c;Complement C3 alpha chain;C3a anaphylatoxin;Acylation stimulating protein;Complement C3b alpha chain;Complement C3c alpha chain fragment 1;Complement C3dg fragment;Complement C3g fragment;Complement C3d fragment;Complement C3f fragment;Complement C3c alpha chain fragment 2	C3	0.525798	1.42553	0.161604	0.527126
Q8K2B3	Succinate dehydrogenase [ubiquinone] flavoprotein subunit, mitochondrial	Sdha	-0.10706	-1.42525	0.161684	0.527126
Q9DCJ1	Target of rapamycin complex subunit LST8	Mlst8	0.198598	1.42664	0.161288	0.527126
Q9D164	FXYD domain-containing ion transport regulator 6	Fxyd6	-0.313752	-1.42434	0.161948	0.527399
P14685	26S proteasome non-ATPase regulatory subunit 3	Psmd3	0.105631	1.4222	0.162563	0.52849
Q9JI19	Acidic fibroblast growth factor intracellular-binding protein	Fibp	-0.208727	-1.42215	0.162578	0.52849
O08582	GTP-binding protein 1	Gtpbp1	-0.252015	-1.42052	0.163049	0.528788
P36916	Guanine nucleotide-binding protein-like 1	Gnl1	-0.142197	-1.42007	0.163179	0.528788
P45376	Aldose reductase	Akr1b1	0.125537	1.42107	0.16289	0.528788
Q91VI7	Ribonuclease inhibitor	Rnh1	0.136919	1.41943	0.163363	0.528788
Q9R0N5	Synaptotagmin-5	Syt5	-0.192818	-1.41928	0.163409	0.528788
P45377	Aldose reductase-related protein 2	Akr1b8	0.388755	1.41643	0.164234	0.530501
Q91YP2	Neurolysin, mitochondrial	Nln	-0.26603	-1.41689	0.164101	0.530501
P97427	Dihydropyrimidinase-related protein 1	Crmp1	-0.0777909	-1.41504	0.164639	0.531089
Q62433	Protein NDRG1	Ndrg1	0.22479	1.41479	0.164713	0.531089
Q8BH24	Transmembrane 9 superfamily member 4	Tm9sf4	0.241152	1.41339	0.165122	0.531102
Q9CZC8	Secernin-1	Scrn1	-0.104119	-1.41325	0.165162	0.531102
Q9DCT5	Stromal cell-derived factor 2	Sdf2	0.354588	1.41418	0.164891	0.531102
Q810U4	Neuronal cell adhesion molecule	Nrcam	-0.0742503	-1.41207	0.165506	0.531645
Q91VM9	Inorganic pyrophosphatase 2, mitochondrial	Ppa2	-0.146647	-1.41165	0.165628	0.531645
Q99J08	SEC14-like protein 2	Sec14l2	-0.148128	-1.40879	0.166469	0.533863
O35963	Ras-related protein Rab-33B	Rab33b	-0.259882	-1.40678	0.16706	0.535281
Q2NL51	Glycogen synthase kinase-3 alpha	Gsk3a	-0.163954	-1.40623	0.167223	0.535321
Q6ZPJ3	E2/E3 hybrid ubiquitin-protein ligase UBE2O	Ube2o	-0.108787	-1.40524	0.167512	0.53577
Q640R3	Hepatocyte cell adhesion molecule	Hepacam	0.129898	1.40428	0.167796	0.535806
Q80UM7	Mannosyl-oligosaccharide glucosidase	Mogs	0.277726	1.40419	0.167823	0.535806
O55131	Septin-7	2023-09-07	-0.0934516	-1.40254	0.168312	0.536522
Q9CZT8	Ras-related protein Rab-3B	Rab3b	-0.174298	-1.40223	0.168404	0.536522
Q9D6N5	Dr1-associated corepressor	Drap1	-0.415941	-1.40192	0.168497	0.536522
O88487	Cytoplasmic dynein 1 intermediate chain 2	Dync1i2	0.16486	1.40127	0.168688	0.536654
P35276	Ras-related protein Rab-3D	Rab3d	-0.578557	-1.40024	0.168995	0.537152
Q3TBW2	39S ribosomal protein L10, mitochondrial	Mrpl10	-0.259368	-1.39648	0.170115	0.537372
Q60967	Bifunctional 3-phosphoadenosine 5-phosphosulfate synthase 1;Sulfate adenylyltransferase;Adenylyl-sulfate kinase	Papss1	0.282436	1.39659	0.170083	0.537372
Q8BG67	Protein EFR3 homolog A	Efr3a	-0.194017	-1.39664	0.170069	0.537372
Q8VEA4	Mitochondrial intermembrane space import and assembly protein 40	Chchd4	-0.2391	-1.3969	0.16999	0.537372
Q9D1G1	Ras-related protein Rab-1B	Rab1b	-0.0791864	-1.39759	0.169784	0.537372
Q9EPL8	Importin-7	Ipo7	-0.148802	-1.39938	0.169251	0.537372
Q9Z0F7	Gamma-synuclein	Sncg	-0.324838	-1.39801	0.16966	0.537372
O70589	Peripheral plasma membrane protein CASK	Cask	-0.124959	-1.39412	0.170821	0.538664
O88745	Scrapie-responsive protein 1	Scrg1	0.184577	1.39411	0.170827	0.538664
Q8C5Q4	G-rich sequence factor 1	Grsf1	-0.267897	-1.39355	0.170995	0.538664
Q9Z110	Delta-1-pyrroline-5-carboxylate synthase;Glutamate 5-kinase;Gamma-glutamyl phosphate reductase	Aldh18a1	0.420146	1.39311	0.171126	0.538664
P16388	Potassium voltage-gated channel subfamily A member 1	Kcna1	0.294593	1.39147	0.171618	0.539264
Q80ZJ6	Protein zer-1 homolog	Zer1	0.251257	1.39147	0.171618	0.539264
P17809	Solute carrier family 2, facilitated glucose transporter member 1	Slc2a1	-0.244936	-1.38629	0.173184	0.539917
P98203	Armadillo repeat protein deleted in velo-cardio-facial syndrome homolog	Arvcf	-0.305288	-1.38864	0.172471	0.539917
Q61704;CON__Q0V8M9	Inter-alpha-trypsin inhibitor heavy chain H3	Itih3	0.374156	1.38649	0.173122	0.539917
Q62384	Zinc finger protein ZPR1	Zpr1	-0.231863	-1.38786	0.172709	0.539917
Q80TL4	Protein KIAA1045	Kiaa1045	-0.106326	-1.38684	0.173016	0.539917
Q80Z24	Neuronal growth regulator 1	Negr1	-0.158489	-1.38994	0.172079	0.539917
Q9D2R6	Cytochrome c oxidase assembly factor 3 homolog, mitochondrial	Coa3	0.497275	1.38708	0.172942	0.539917
Q9DCZ1	GMP reductase 1	Gmpr	0.214463	1.38644	0.173137	0.539917
Q9JM63	ATP-sensitive inward rectifier potassium channel 10	Kcnj10	0.317426	1.38917	0.172313	0.539917
Q99L45	Eukaryotic translation initiation factor 2 subunit 2	Eif2s2	0.253929	1.38366	0.173982	0.541347
Q9CQY2	RNMT-activating mini protein	Fam103a1	-0.368483	-1.38328	0.174096	0.541347
Q9Z2I0	LETM1 and EF-hand domain-containing protein 1, mitochondrial	Letm1	-0.0759154	-1.38418	0.173823	0.541347
O35643	AP-1 complex subunit beta-1	Ap1b1	0.111945	1.38085	0.174838	0.541772
Q8BRV5	Uncharacterized protein KIAA1671	Kiaa1671	-0.23428	-1.38107	0.17477	0.541772
Q9CQN1	Heat shock protein 75 kDa, mitochondrial	Trap1	-0.157483	-1.38134	0.174687	0.541772
Q9CQV6	Microtubule-associated proteins 1A/1B light chain 3B	Map1lc3b	-0.216229	-1.38131	0.174697	0.541772
Q8BWU5	Probable tRNA N6-adenosine threonylcarbamoyltransferase	Osgep	-0.498467	-1.37927	0.175322	0.5428
Q8CDN6	Thioredoxin-like protein 1	Txnl1	-0.111689	-1.37854	0.175544	0.543017
Q68EF8	Rap guanine nucleotide exchange factor-like 1	Rapgefl1	-0.212572	-1.37704	0.176003	0.543582
Q8VHY0	Chondroitin sulfate proteoglycan 4	Cspg4	0.123389	1.37695	0.17603	0.543582
Q5FWK3	Rho GTPase-activating protein 1	Arhgap1	-0.118365	-1.37578	0.17639	0.543608
Q61937	Nucleophosmin	Npm1	0.16041	1.37543	0.176498	0.543608
Q8BGT8	Phytanoyl-CoA hydroxylase-interacting protein-like	Phyhipl	-0.106022	-1.37573	0.176407	0.543608
Q9Z1Q2	Abhydrolase domain-containing protein 16A	Abhd16a	-0.251935	-1.37495	0.176646	0.543608
P01864;P01863;P01865	Ig gamma-2A chain C region secreted form		-0.855522	-1.37322	0.177178	0.544776
P62717	60S ribosomal protein L18a	Rpl18a	0.295942	1.37259	0.177372	0.544906
P27661	Histone H2AX	H2afx	0.342161	1.3713	0.177772	0.545665
O70435	Proteasome subunit alpha type-3	Psma3	-0.116125	-1.37071	0.177953	0.545753
O88441	Metaxin-2	Mtx2	-0.150757	-1.36702	0.179099	0.548797
Q9QUR8	Semaphorin-7A	Sema7a	0.2008	1.36572	0.179503	0.549564
Q8BPQ7	Small G protein signaling modulator 1	Sgsm1	0.17429	1.36464	0.17984	0.549657
Q9DC50	Peroxisomal carnitine O-octanoyltransferase	Crot	0.308706	1.36466	0.179834	0.549657
P06797	Cathepsin L1;Cathepsin L1 heavy chain;Cathepsin L1 light chain	Ctsl	0.220508	1.36373	0.180123	0.550053
Q9D0L8	mRNA cap guanine-N7 methyltransferase	Rnmt	0.219519	1.36315	0.180307	0.550145
O89001	Carboxypeptidase D	Cpd	-0.246005	-1.35869	0.181703	0.553754
Q91VM3	WD repeat domain phosphoinositide-interacting protein 4	Wdr45	0.230143	1.35839	0.1818	0.553754
Q9QZD8	Mitochondrial dicarboxylate carrier	Slc25a10	-0.254739	-1.35731	0.18214	0.554317
P38060	Hydroxymethylglutaryl-CoA lyase, mitochondrial	Hmgcl	0.187309	1.35258	0.183633	0.555086
P70232	Neural cell adhesion molecule L1-like protein;Processed neural cell adhesion molecule L1-like protein	Chl1	0.180479	1.35304	0.183489	0.555086
P97494	Glutamate--cysteine ligase catalytic subunit	Gclc	-0.120706	-1.35342	0.183369	0.555086
Q00915	Retinol-binding protein 1	Rbp1	-0.394565	-1.35476	0.182943	0.555086
Q00PI9	Heterogeneous nuclear ribonucleoprotein U-like protein 2	Hnrnpul2	-0.105124	-1.35358	0.183318	0.555086
Q6PFR5	Transformer-2 protein homolog alpha	Tra2a	0.213865	1.35356	0.183324	0.555086
Q6PHN9	Ras-related protein Rab-35	Rab35	-0.192097	-1.35599	0.182556	0.555086
Q9CR21	Acyl carrier protein, mitochondrial	Ndufab1	-0.345444	-1.35279	0.183566	0.555086
O35668	Huntingtin-associated protein 1	Hap1	-0.227603	-1.34534	0.185939	0.55583
O88532	Zinc finger RNA-binding protein	Zfr	0.227707	1.34632	0.185627	0.55583
P10126	Elongation factor 1-alpha 1	Eef1a1	0.0883952	1.34372	0.186458	0.55583
P35235	Tyrosine-protein phosphatase non-receptor type 11	Ptpn11	-0.162611	-1.34529	0.185957	0.55583
P35979	60S ribosomal protein L12	Rpl12	0.0932928	1.34112	0.187294	0.55583
P36536	GTP-binding protein SAR1a	Sar1a	0.20462	1.33967	0.187761	0.55583
P55012	Solute carrier family 12 member 2	Slc12a2	-0.259567	-1.3397	0.187752	0.55583
P97765	WW domain-binding protein 2	Wbp2	-0.279423	-1.34879	0.184838	0.55583
Q3UJD6	Ubiquitin carboxyl-terminal hydrolase 19	Usp19	0.261193	1.34966	0.184563	0.55583
Q60634	Flotillin-2	Flot2	-0.1327	-1.34104	0.187322	0.55583
Q61220	Protein kinase C-binding protein NELL2	Nell2	0.198433	1.3484	0.184963	0.55583
Q6P542	ATP-binding cassette sub-family F member 1	Abcf1	0.227227	1.34964	0.184567	0.55583
Q7TMS5	ATP-binding cassette sub-family G member 2	Abcg2	-0.184577	-1.34534	0.185942	0.55583
Q8BTY2	Sodium bicarbonate cotransporter 3	Slc4a7	-0.355687	-1.3499	0.184485	0.55583
Q8C437	PEX5-related protein	Pex5l	-0.184676	-1.34329	0.186597	0.55583
Q8C8R3	Ankyrin-2	Ank2	-0.068866	-1.34153	0.187163	0.55583
Q8CCB4	Vacuolar protein sorting-associated protein 53 homolog	Vps53	-0.2255	-1.34019	0.187594	0.55583
Q8R3B1	1-phosphatidylinositol 4,5-bisphosphate phosphodiesterase delta-1	Plcd1	0.23012	1.34505	0.186033	0.55583
Q9CQM5	Thioredoxin domain-containing protein 17	Txndc17	-0.129411	-1.34197	0.187023	0.55583
Q9CQQ7	ATP synthase F(0) complex subunit B1, mitochondrial	Atp5f1	-0.125238	-1.34466	0.18616	0.55583
Q9CXW2	28S ribosomal protein S22, mitochondrial	Mrps22	-0.227607	-1.34105	0.187316	0.55583
Q9EPK7	Exportin-7	Xpo7	-0.328744	-1.34429	0.186276	0.55583
Q9JHI5	Isovaleryl-CoA dehydrogenase, mitochondrial	Ivd	-0.161867	-1.34673	0.185495	0.55583
Q9JIY5	Serine protease HTRA2, mitochondrial	Htra2	-0.234154	-1.34274	0.186773	0.55583
Q9R1V7	Disintegrin and metalloproteinase domain-containing protein 23	Adam23	-0.133705	-1.34197	0.187023	0.55583
P14094	Sodium/potassium-transporting ATPase subunit beta-1	Atp1b1	-0.0911235	-1.33764	0.188417	0.557308
O35551	Rab GTPase-binding effector protein 1	Rabep1	-0.289496	-1.33621	0.188882	0.558053
Q8R086	Sulfite oxidase, mitochondrial	Suox	0.233036	1.3359	0.18898	0.558053
O35215	D-dopachrome decarboxylase	Ddt	-0.219225	-1.33464	0.18939	0.558803
O54988	STE20-like serine/threonine-protein kinase	Slk	-0.181651	-1.33345	0.189775	0.559348
Q8VHH5	Arf-GAP with GTPase, ANK repeat and PH domain-containing protein 3	Agap3	-0.112362	-1.33291	0.189952	0.559348
Q91ZU6	Dystonin	Dst	-0.134612	-1.33263	0.190044	0.559348
Q9WVA4	Transgelin-2	Tagln2	0.316666	1.33107	0.190551	0.56038
Q4QQM5	Protein FAM73A	Fam73a	0.22167	1.32852	0.191385	0.561116
Q8CCJ4	APC membrane recruitment protein 2	Amer2	-0.23491	-1.329	0.191229	0.561116
Q91VA6	Polymerase delta-interacting protein 2	Poldip2	-0.1988	-1.32925	0.191147	0.561116
Q9D6F9	Tubulin beta-4A chain	Tubb4a	-0.129328	-1.32839	0.191428	0.561116
Q8VE33	Ganglioside-induced differentiation-associated protein 1-like 1	Gdap1l1	-0.113789	-1.32786	0.191601	0.561161
B9EJ86	Oxysterol-binding protein	Osbpl8	-0.27256	-1.32694	0.191903	0.561238
O89086	RNA-binding protein 3	Rbm3	-0.320682	-1.32682	0.191941	0.561238
Q99KH8;Q99JT2;Q9Z2W1	Serine/threonine-protein kinase 24;Serine/threonine-protein kinase 24 35 kDa subunit;Serine/threonine-protein kinase 24 12 kDa subunit	Stk24	0.181958	1.32625	0.19213	0.561333
Q8BTX9	Inactive hydroxysteroid dehydrogenase-like protein 1	Hsdl1	0.153849	1.32398	0.192874	0.563048
Q8BIK4	Dedicator of cytokinesis protein 9	Dock9	0.194798	1.32162	0.193654	0.564865
Q08642	Protein-arginine deiminase type-2	Padi2	0.321314	1.32112	0.193819	0.564886
A2ASQ1	Agrin;Agrin N-terminal 110 kDa subunit;Agrin C-terminal 110 kDa subunit;Agrin C-terminal 90 kDa fragment;Agrin C-terminal 22 kDa fragment	Agrn	0.156286	1.32015	0.194137	0.565256
Q9WVT6	Carbonic anhydrase 14	Ca14	-0.269163	-1.31978	0.194262	0.565256
O08529	Calpain-2 catalytic subunit	Capn2	0.145131	1.3179	0.194885	0.566588
P63040	Complexin-1	Cplx1	-0.133963	-1.31744	0.195037	0.566588
Q8BFT9	Synaptic vesicle 2-related protein	Svop	-0.239231	-1.31671	0.195278	0.56683
Q6ZWQ0	Nesprin-2	Syne2	-0.656447	-1.31526	0.195763	0.567776
P0DP60			-0.179465	-1.31421	0.196111	0.568326
O35857	Mitochondrial import inner membrane translocase subunit TIM44	Timm44	-0.152271	-1.3127	0.196616	0.568866
Q9QZQ8	Core histone macro-H2A.1	H2afy	-0.12606	-1.31282	0.196576	0.568866
Q61879	Myosin-10	Myh10	-0.0700021	-1.31027	0.197428	0.570756
P17095	High mobility group protein HMG-I/HMG-Y	Hmga1	0.254028	1.3061	0.19883	0.572296
P60041	Somatostatin;Antrin;Somatostatin-28;Somatostatin-14	Sst	-0.291029	-1.30634	0.198747	0.572296
P62880	Guanine nucleotide-binding protein G(I)/G(S)/G(T) subunit beta-2	Gnb2	-0.104409	-1.30523	0.199123	0.572296
Q6PD26	GPI transamidase component PIG-S	Pigs	0.277011	1.30485	0.19925	0.572296
Q8BFR5	Elongation factor Tu, mitochondrial	Tufm	-0.091467	-1.3076	0.198325	0.572296
Q8BHB9	Chloride intracellular channel protein 6	Clic6	-1.21032	-1.3055	0.199033	0.572296
Q8BIF2	RNA binding protein fox-1 homolog 3	Rbfox3	-0.139711	-1.30682	0.198586	0.572296
Q8BMS1	Trifunctional enzyme subunit alpha, mitochondrial;Long-chain enoyl-CoA hydratase;Long chain 3-hydroxyacyl-CoA dehydrogenase	Hadha	0.106415	1.30441	0.1994	0.572296
Q921M4	Golgin subfamily A member 2	Golga2	-0.22985	-1.30663	0.198653	0.572296
Q9ERS2	NADH dehydrogenase [ubiquinone] 1 alpha subcomplex subunit 13	Ndufa13	-0.188557	-1.30352	0.199702	0.572702
P70202	Latexin	Lxn	0.202889	1.30149	0.200388	0.573292
Q3TLS3	GDP-D-glucose phosphorylase 1	Gdpgp1	0.262712	1.30196	0.200228	0.573292
Q8VE70	Programmed cell death protein 10	Pdcd10	-0.181548	-1.30169	0.200319	0.573292
Q9Z127;Q8BGK6	Large neutral amino acids transporter small subunit 1	Slc7a5	0.176438	1.30055	0.200704	0.573739
P23198	Chromobox protein homolog 3	Cbx3	-0.102489	-1.2959	0.202289	0.574684
Q64727	Vinculin	Vcl	0.141818	1.2958	0.202323	0.574684
Q80TL1	Adenylate cyclase type 2	Adcy2	0.342713	1.29793	0.201597	0.574684
Q8BIW1	Protein prune homolog	Prune	-0.120973	-1.29609	0.202223	0.574684
Q8BRF7	Sec1 family domain-containing protein 1	Scfd1	0.271995	1.29692	0.20194	0.574684
Q8CHC4	Synaptojanin-1	Synj1	-0.0724053	-1.29534	0.20248	0.574684
Q8CHW4	Translation initiation factor eIF-2B subunit epsilon	Eif2b5	0.206435	1.29669	0.202017	0.574684
Q9JIW9	Ras-related protein Ral-B	Ralb	0.233277	1.29613	0.202209	0.574684
Q9JMH9	Unconventional myosin-XVIIIa	Myo18a	-0.0919549	-1.29845	0.20142	0.574684
Q60710	Deoxynucleoside triphosphate triphosphohydrolase SAMHD1	Samhd1	0.572046	1.29414	0.202888	0.575386
Q3TC33	Coiled-coil domain-containing protein 127	Ccdc127	-0.243113	-1.29297	0.203289	0.575738
Q9DBL7	Bifunctional coenzyme A synthase;Phosphopantetheine adenylyltransferase;Dephospho-CoA kinase	Coasy	0.119729	1.29284	0.203334	0.575738
P11087	Collagen alpha-1(I) chain	Col1a1	-0.518277	-1.29208	0.203596	0.576024
Q00558	Factor VIII intron 22 protein	F8a1	-0.267088	-1.29014	0.204262	0.576067
Q6ZWY9;Q64478;P10853;P10854;Q64475;Q64525;Q8CGP2;Q8CGP1;Q9D2U9;P70696;Q8CGP0;Q64524	Histone H2B type 1-C/E/G;Histone H2B type 1-H;Histone H2B type 1-F/J/L;Histone H2B type 1-M;Histone H2B type 1-B;Histone H2B type 2-B;Histone H2B type 1-P;Histone H2B type 1-K;Histone H2B type 3-A;Histone H2B type 1-A;Histone H2B type 3-B;Histone H2B type 2-E	Hist1h2bc;Hist1h2bh;Hist1h2bf;Hist1h2bm;Hist1h2bb;Hist2h2bb;Hist1h2bp;Hist1h2bk;Hist3h2ba;Hist1h2ba;Hist3h2bb;Hist2h2be	0.154377	1.29073	0.204059	0.576067
Q80U23;Q8BHS8	Syntaphilin	Snph	-0.14865	-1.29145	0.203813	0.576067
Q922Q8	Leucine-rich repeat-containing protein 59	Lrrc59	0.135817	1.28969	0.204416	0.576067
Q9R0X4;Q32MW3	Acyl-coenzyme A thioesterase 9, mitochondrial	Acot9	0.111218	1.28977	0.204389	0.576067
P21126	Ubiquitin-like protein 4A	Ubl4a	-0.25182	-1.28871	0.204753	0.576409
P22892	AP-1 complex subunit gamma-1	Ap1g1	0.172713	1.28812	0.204957	0.576409
P97478	5-demethoxyubiquinone hydroxylase, mitochondrial	Coq7	-0.218581	-1.28794	0.20502	0.576409
P03987	Ig gamma-3 chain C region		0.816009	1.28697	0.205355	0.576897
P12961	Neuroendocrine protein 7B2;N-terminal peptide;C-terminal peptide	Scg5	0.327133	1.28615	0.205637	0.577234
O88456;Q9D7J7	Calpain small subunit 1	Capns1	0.145424	1.28484	0.206089	0.577693
P11531	Dystrophin	Dmd	0.241033	1.28446	0.206222	0.577693
Q6NS52	Diacylglycerol kinase beta	Dgkb	-0.169592	-1.28381	0.206446	0.577693
Q9ET80	Junctophilin-1	Jph1	0.167848	1.28411	0.206344	0.577693
Q9D8T7	SRA stem-loop-interacting RNA-binding protein, mitochondrial	Slirp	-0.326297	-1.28213	0.207028	0.57887
Q8BVI5	Syntaxin-16	Stx16	0.222004	1.27893	0.208144	0.581081
Q9DC28;Q9JMK2	Casein kinase I isoform delta;Casein kinase I isoform epsilon	Csnk1d;Csnk1e	0.188795	1.27921	0.208047	0.581081
Q8BH58	TIP41-like protein	Tiprl	-0.134305	-1.27683	0.208876	0.581312
Q8QZR5	Alanine aminotransferase 1	Gpt	-0.185598	-1.27804	0.208454	0.581312
Q91XU3	Phosphatidylinositol 5-phosphate 4-kinase type-2 gamma	Pip4k2c	-0.195127	-1.27765	0.208591	0.581312
Q9DB16	Calcium-binding protein 39-like	Cab39l	-0.369465	-1.27726	0.208728	0.581312
A2A699	Protein FAM171A2	Fam171a2	0.259249	1.27523	0.209436	0.582238
O08756	3-hydroxyacyl-CoA dehydrogenase type-2	Hsd17b10	0.107518	1.2737	0.209972	0.582238
Q68ED2;P47743	Metabotropic glutamate receptor 7	Grm7	-0.210524	-1.27381	0.209933	0.582238
Q91YN5	UDP-N-acetylhexosamine pyrophosphorylase;UDP-N-acetylgalactosamine pyrophosphorylase;UDP-N-acetylglucosamine pyrophosphorylase	Uap1	0.22779	1.27442	0.209722	0.582238
Q9JHU4	Cytoplasmic dynein 1 heavy chain 1	Dync1h1	-0.0512081	-1.27356	0.210022	0.582238
P11103	Poly [ADP-ribose] polymerase 1	Parp1	-0.255096	-1.27207	0.210544	0.582333
P61967	AP-1 complex subunit sigma-1A	Ap1s1	-0.133862	-1.27249	0.210398	0.582333
P61979	Heterogeneous nuclear ribonucleoprotein K	Hnrnpk	-0.0867673	-1.27214	0.210522	0.582333
P11881	Inositol 1,4,5-trisphosphate receptor type 1	Itpr1	-0.132166	-1.27068	0.211036	0.582343
Q4QQM4	Tumor protein p53-inducible protein 11	Trp53i11	-0.270373	-1.27087	0.210968	0.582343
Q8BK67	Protein RCC2	Rcc2	-0.196587	-1.27117	0.210864	0.582343
Q6DIC0	Probable global transcription activator SNF2L2	Smarca2	-0.299183	-1.26981	0.211342	0.582736
P28028	Serine/threonine-protein kinase B-raf	Braf	-0.109164	-1.26892	0.211656	0.583153
Q9QX60	Deoxyguanosine kinase, mitochondrial	Dguok	-0.376403	-1.26776	0.212066	0.583834
Q9Z1S5	Neuronal-specific septin-3	2023-09-03	-0.0926244	-1.26692	0.212365	0.584207
Q9D3D9	ATP synthase subunit delta, mitochondrial	Atp5d	0.259569	1.26633	0.212573	0.58433
Q8C878	NEDD8-activating enzyme E1 catalytic subunit	Uba3	-0.226	-1.26463	0.213175	0.585535
Q3TY86	Apoptosis-inducing factor 3	Aifm3	-0.243078	-1.2612	0.214397	0.588321
Q8R4U7	Leucine zipper protein 1	Luzp1	-0.191651	-1.26086	0.214518	0.588321
E9Q414	Apolipoprotein B-100;Apolipoprotein B-48	Apob	0.295042	1.25963	0.214957	0.588623
Q9CR09	Ubiquitin-fold modifier-conjugating enzyme 1	Ufc1	-0.163617	-1.25986	0.214872	0.588623
P50428	Arylsulfatase A	Arsa	-0.255829	-1.25874	0.215274	0.58904
Q8VCI5	Peroxisomal biogenesis factor 19	Pex19	0.17561	1.25724	0.215812	0.589162
Q9D328	Transmembrane protein 35	Tmem35	0.190173	1.25765	0.215664	0.589162
Q9JK48	Endophilin-B1	Sh3glb1	-0.168398	-1.25746	0.215731	0.589162
Q3UU96	Serine/threonine-protein kinase MRCK alpha	Cdc42bpa	0.23719	1.25641	0.216111	0.589527
P17225;Q8BHD7	Polypyrimidine tract-binding protein 1	Ptbp1	0.304521	1.25569	0.216367	0.589776
Q499X9	Methionine--tRNA ligase, mitochondrial	Mars2	-0.244123	-1.25502	0.216608	0.589986
Q8R550	SH3 domain-containing kinase-binding protein 1	Sh3kbp1	0.188195	1.25364	0.217106	0.59089
Q8CI75	DIS3-like exonuclease 2	Dis3l2	0.194141	1.25177	0.217776	0.592265
Q62426	Cystatin-B	Cstb	-0.213614	-1.25052	0.218228	0.593045
Q4KMM3	Oxidation resistance protein 1	Oxr1	-0.0825194	-1.24992	0.218445	0.593182
Q9ERI6	Retinol dehydrogenase 14	Rdh14	-0.117429	-1.24939	0.218636	0.593252
P83917	Chromobox protein homolog 1	Cbx1	0.269878	1.24854	0.218944	0.593355
Q9D6K8	FUN14 domain-containing protein 2	Fundc2	-0.220538	-1.24837	0.219006	0.593355
Q3UFK8	FERM domain-containing protein 8	Frmd8	0.229085	1.24635	0.219742	0.593999
Q8BJ71	Nuclear pore complex protein Nup93	Nup93	0.201764	1.24661	0.219644	0.593999
Q9R226	KH domain-containing, RNA-binding, signal transduction-associated protein 3	Khdrbs3	-0.163052	-1.24709	0.219471	0.593999
P39688;P14234	Tyrosine-protein kinase Fyn	Fyn	0.36173	1.24451	0.22041	0.594459
P62484	Abl interactor 2	Abi2	-0.120574	-1.2451	0.220196	0.594459
Q3URE1	Acyl-CoA synthetase family member 3, mitochondrial	Acsf3	-0.156408	-1.24453	0.220403	0.594459
O08810	116 kDa U5 small nuclear ribonucleoprotein component	Eftud2	0.143619	1.2418	0.221397	0.595965
P97352	Protein S100-A13	S100a13	0.214663	1.24112	0.221645	0.595965
Q3THG9	Alanyl-tRNA editing protein Aarsd1	Aarsd1	0.164358	1.24226	0.221229	0.595965
Q60960	Importin subunit alpha-5;Importin subunit alpha-5, N-terminally processed	Kpna1	-0.175735	-1.24043	0.221897	0.595965
Q9DAK9	14 kDa phosphohistidine phosphatase	Phpt1	-0.156609	-1.24144	0.221527	0.595965
Q9WV96	Mitochondrial import inner membrane translocase subunit Tim10 B	Timm10b	-0.21592	-1.24024	0.221967	0.595965
Q9D0L4	Uncharacterized aarF domain-containing protein kinase 1	Adck1	-0.223478	-1.23908	0.222392	0.596658
Q62241	U1 small nuclear ribonucleoprotein C	Snrpc	-0.152736	-1.23645	0.223357	0.596741
Q6ZWV7	60S ribosomal protein L35	Rpl35	0.222075	1.23536	0.223757	0.596741
Q8R1G2	Carboxymethylenebutenolidase homolog	Cmbl	0.379241	1.23809	0.222755	0.596741
Q99KU0	Vacuole membrane protein 1	Vmp1	-0.216654	-1.23764	0.222921	0.596741
Q9CQV5	28S ribosomal protein S24, mitochondrial	Mrps24	-0.143692	-1.23613	0.223474	0.596741
Q9ERR1;Q9CZA6	Nuclear distribution protein nudE-like 1	Ndel1	0.317094	1.23654	0.223323	0.596741
Q9QXG4	Acetyl-coenzyme A synthetase, cytoplasmic	Acss2	0.190096	1.2355	0.223705	0.596741
Q9WVF8	Tumor suppressor candidate 2	Tusc2	-0.147922	-1.23566	0.223647	0.596741
Q9D1C3	Protein preY, mitochondrial	Pyurf	-0.330002	-1.2348	0.223965	0.59685
Q7TSQ8	Pyruvate dehydrogenase phosphatase regulatory subunit, mitochondrial	Pdpr	-0.210097	-1.23327	0.224528	0.597907
Q9WUD1	STIP1 homology and U box-containing protein 1	Stub1	-0.34469	-1.22893	0.226135	0.601737
Q99JI6	Ras-related protein Rap-1b	Rap1b	-0.23379	-1.22801	0.226477	0.602201
Q9CWJ9	Bifunctional purine biosynthesis protein PURH;Phosphoribosylaminoimidazolecarboxamide formyltransferase;IMP cyclohydrolase	Atic	0.101594	1.22672	0.226955	0.603022
Q9JKX6	ADP-sugar pyrophosphatase	Nudt5	0.182197	1.22508	0.227565	0.604196
Q8VCD6	Receptor expression-enhancing protein 2	Reep2	-0.243203	-1.22424	0.227881	0.604585
P05213	Tubulin alpha-1B chain	Tuba1b	-0.0656926	-1.22322	0.228261	0.605146
O54724	Polymerase I and transcript release factor	Ptrf	-0.21845	-1.22121	0.229012	0.606237
Q8BMS4	Ubiquinone biosynthesis O-methyltransferase, mitochondrial	Coq3	-0.211193	-1.2214	0.22894	0.606237
P0DN34			-0.170627	-1.2171	0.230554	0.609868
Q9D4H8	Cullin-2	Cul2	0.246159	1.21514	0.231291	0.610625
Q9WUR2;Q78JN3	Enoyl-CoA delta isomerase 2, mitochondrial	Eci2	0.181604	1.21508	0.231318	0.610625
Q9Z0Y1	Dynactin subunit 3	Dctn3	-0.17921	-1.21499	0.231351	0.610625
Q3TDD9	Protein phosphatase 1 regulatory subunit 21	Ppp1r21	-0.381129	-1.21422	0.23164	0.610936
Q8BVU5	ADP-ribose pyrophosphatase, mitochondrial	Nudt9	0.225011	1.21363	0.231861	0.611069
P28660	Nck-associated protein 1	Nckap1	-0.157788	-1.21197	0.232492	0.611396
Q5SUR0	Phosphoribosylformylglycinamidine synthase	Pfas	-0.150224	-1.21156	0.232648	0.611396
Q8C1Y8	Vacuolar fusion protein CCZ1 homolog	Ccz1	0.218238	1.21231	0.232363	0.611396
Q8R0A7	Uncharacterized protein KIAA0513	Kiaa0513	-0.120877	-1.2115	0.232669	0.611396
O35114	Lysosome membrane protein 2	Scarb2	0.254213	1.21056	0.233026	0.611885
P84086	Complexin-2	Cplx2	-0.128871	-1.20911	0.233578	0.612477
Q8C6E0	Cilia- and flagella-associated protein 36	Cfap36	-0.262811	-1.20861	0.233765	0.612477
Q8K2H2	OTU domain-containing protein 6B	Otud6b	0.271767	1.20885	0.233677	0.612477
O88531	Palmitoyl-protein thioesterase 1	Ppt1	0.130233	1.2079	0.234035	0.612729
Q9CS42	Ribose-phosphate pyrophosphokinase 2	Prps2	-0.210083	-1.20746	0.234203	0.612729
P0C0A3	Charged multivesicular body protein 6	Chmp6	-0.27119	-1.20675	0.234475	0.612993
Q8VD62	UPF0696 protein C11orf68 homolog	Bles03	0.25864	1.20622	0.234676	0.613069
Q9ERU9	E3 SUMO-protein ligase RanBP2	Ranbp2	-0.245458	-1.20498	0.235148	0.613855
Q8BW41	Protein O-linked-mannose beta-1,4-N-acetylglucosaminyltransferase 2	Pomgnt2	-0.228812	-1.20418	0.235455	0.614207
Q61166	Microtubule-associated protein RP/EB family member 1	Mapre1	0.163657	1.20119	0.236599	0.616294
Q91ZP9	N-terminal EF-hand calcium-binding protein 2	Necab2	-0.116483	-1.20157	0.236455	0.616294
Q11011	Puromycin-sensitive aminopeptidase	Npepps	-0.0599782	-1.19965	0.23719	0.617384
P52503	NADH dehydrogenase [ubiquinone] iron-sulfur protein 6, mitochondrial	Ndufs6	-0.124024	-1.19919	0.237366	0.617394
P01867	Ig gamma-2B chain C region	Igh-3	0.594525	1.19804	0.237809	0.618097
P84078	ADP-ribosylation factor 1	Arf1	0.387206	1.19584	0.238658	0.619403
Q4JIM5;P00520	Abelson tyrosine-protein kinase 2	Abl2	0.189899	1.19626	0.238498	0.619403
Q9QZE7	Translin-associated protein X	Tsnax	-0.19183	-1.19429	0.239258	0.62051
Q6P9R2	Serine/threonine-protein kinase OSR1	Oxsr1	0.27633	1.19361	0.23952	0.620741
P54763	Ephrin type-B receptor 2	Ephb2	-0.183692	-1.19079	0.240612	0.622218
P85094	Isochorismatase domain-containing protein 2A, mitochondrial	Isoc2a	-0.14703	-1.19098	0.240541	0.622218
Q9QUM9	Proteasome subunit alpha type-6	Psma6	0.0934017	1.19168	0.240268	0.622218
P31786	Acyl-CoA-binding protein	Dbi	0.16445	1.18817	0.241633	0.623625
P39447	Tight junction protein ZO-1	Tjp1	0.144723	1.18871	0.241423	0.623625
Q80ZI6	E3 ubiquitin-protein ligase LRSAM1	Lrsam1	0.191419	1.18805	0.241679	0.623625
Q8VEH5	EPM2A-interacting protein 1	Epm2aip1	-0.13556	-1.18733	0.241961	0.623903
Q61598	Rab GDP dissociation inhibitor beta	Gdi2	0.0779882	1.18684	0.242153	0.623948
Q3UHK6	Teneurin-4	Tenm4	0.176608	1.18581	0.242552	0.624529
Q5HZI9	Solute carrier family 25 member 51	Slc25a51	-0.244915	-1.18488	0.242917	0.625018
A2ALU4;Q1W617;Q9QXN0	Protein Shroom2	Shroom2	0.145754	1.17872	0.245334	0.62528
O08547	Vesicle-trafficking protein SEC22b	Sec22b	-0.134326	-1.17754	0.245799	0.62528
O35344	Importin subunit alpha-4	Kpna3	0.154666	1.18081	0.244513	0.62528
P03888	NADH-ubiquinone oxidoreductase chain 1	Mtnd1	-0.149822	-1.175	0.246803	0.62528
P0C7L0	WAS/WASL-interacting protein family member 3	Wipf3	-0.133427	-1.18001	0.244825	0.62528
P15327	Bisphosphoglycerate mutase	Bpgm	-0.31848	-1.17747	0.245828	0.62528
P19137	Laminin subunit alpha-1	Lama1	-0.210857	-1.18155	0.244221	0.62528
P47809	Dual specificity mitogen-activated protein kinase kinase 4	Map2k4	-0.0860609	-1.18365	0.243396	0.62528
P70297;O88811	Signal transducing adapter molecule 1	Stam	-0.0747413	-1.18124	0.244342	0.62528
Q03137;P29319	Ephrin type-A receptor 4	Epha4	-0.0889885	-1.17634	0.246271	0.62528
Q5XJV6	Serine/threonine-protein kinase LMTK3	Lmtk3	-0.181024	-1.17664	0.246154	0.62528
Q64362	AKT-interacting protein	Aktip	0.175683	1.17975	0.24493	0.62528
Q80TI0	GRAM domain-containing protein 1B	Gramd1b	-0.157359	-1.1756	0.246564	0.62528
Q80W54	CAAX prenyl protease 1 homolog	Zmpste24	-0.178348	-1.17427	0.247091	0.62528
Q8BGB7	Enolase-phosphatase E1	Enoph1	0.239335	1.18162	0.244193	0.62528
Q8BIJ6	Isoleucine--tRNA ligase, mitochondrial	Iars2	-0.0926802	-1.18263	0.243799	0.62528
Q91V41	Ras-related protein Rab-14	Rab14	0.0977216	1.17396	0.247212	0.62528
Q91YJ2	Sorting nexin-4	Snx4	-0.112807	-1.17405	0.247177	0.62528
Q9CR00	26S proteasome non-ATPase regulatory subunit 9	Psmd9	-0.182838	-1.17754	0.245798	0.62528
Q9CR16	Peptidyl-prolyl cis-trans isomerase D	Ppid	0.0665457	1.18107	0.244409	0.62528
Q9D1P4	Cysteine and histidine-rich domain-containing protein 1	Chordc1	0.0960507	1.17788	0.245666	0.62528
Q9D273	Cob(I)yrinic acid a,c-diamide adenosyltransferase, mitochondrial	Mmab	0.145537	1.18193	0.24407	0.62528
Q9D964	Glycine amidinotransferase, mitochondrial	Gatm	0.382697	1.17486	0.246857	0.62528
Q9EQC5	N-terminal kinase-like protein	Scyl1	0.205129	1.17739	0.245856	0.62528
P60603	Reactive oxygen species modulator 1	Romo1	-0.179402	-1.17291	0.247631	0.625898
P09925	Surfeit locus protein 1	Surf1	0.192879	1.17007	0.248757	0.626091
P62071	Ras-related protein R-Ras2	Rras2	-0.278309	-1.17043	0.248616	0.626091
P70670;Q60817	Nascent polypeptide-associated complex subunit alpha, muscle-specific form;Nascent polypeptide-associated complex subunit alpha	Naca	0.132199	1.17057	0.248557	0.626091
Q03265;REV__P54729	ATP synthase subunit alpha, mitochondrial	Atp5a1	-0.0762812	-1.17065	0.248529	0.626091
Q60631	Growth factor receptor-bound protein 2	Grb2	-0.146051	-1.17207	0.247962	0.626091
Q99020	Heterogeneous nuclear ribonucleoprotein A/B	Hnrnpab	-0.0942159	-1.17084	0.248451	0.626091
O70250	Phosphoglycerate mutase 2	Pgam2	-0.253771	-1.1682	0.249503	0.626358
P04227;P14438;P14437;P14436;P14435;P23150;P14434;P04228;P01910	H-2 class II histocompatibility antigen, A-Q alpha chain;H-2 class II histocompatibility antigen, A-U alpha chain;H-2 class II histocompatibility antigen, A-S alpha chain;H-2 class II histocompatibility antigen, A-R alpha chain;H-2 class II histocompatibility antigen, A-F alpha chain;H-2 class II histocompatibility antigen, I-E alpha chain;H-2 class II histocompatibility antigen, A-B alpha chain;…	H2-Aa	0.179814	1.16642	0.250213	0.626358
P54823	Probable ATP-dependent RNA helicase DDX6	Ddx6	0.0927606	1.16586	0.250438	0.626358
P62823	Ras-related protein Rab-3C	Rab3c	-0.0871862	-1.16744	0.249807	0.626358
P80560	Receptor-type tyrosine-protein phosphatase N2	Ptprn2	0.163261	1.166	0.250382	0.626358
Q8C1A5	Thimet oligopeptidase	Thop1	-0.0818635	-1.1662	0.250302	0.626358
Q8CHK3	Lysophospholipid acyltransferase 7	Mboat7	0.320103	1.16668	0.250108	0.626358
Q9CYS6	Uncharacterized protein C2orf72 homolog		0.346941	1.16832	0.249456	0.626358
Q9DCS2	UPF0585 protein C16orf13 homolog		-0.248647	-1.16748	0.24979	0.626358
O55106	Striatin	Strn	-0.122652	-1.15937	0.253042	0.628392
P12849	cAMP-dependent protein kinase type I-beta regulatory subunit	Prkar1b	-0.158598	-1.1617	0.252103	0.628392
P12970	60S ribosomal protein L7a	Rpl7a	0.107963	1.15854	0.253377	0.628392
P29595	NEDD8	Nedd8	-0.216992	-1.15888	0.253239	0.628392
P32233	Developmentally-regulated GTP-binding protein 1	Drg1	0.203069	1.15815	0.253534	0.628392
P63017	Heat shock cognate 71 kDa protein	Hspa8	0.0646432	1.15866	0.253325	0.628392
P63323	40S ribosomal protein S12	Rps12	-0.142993	-1.16287	0.251635	0.628392
Q8R3Q2	Serine/threonine-protein phosphatase 6 regulatory subunit 2	Ppp6r2	-0.186986	-1.15821	0.25351	0.628392
Q99L43	Phosphatidate cytidylyltransferase 2	Cds2	-0.145481	-1.15845	0.253413	0.628392
Q9D338	39S ribosomal protein L19, mitochondrial	Mrpl19	0.438376	1.16089	0.252428	0.628392
Q9DC61	Mitochondrial-processing peptidase subunit alpha	Pmpca	0.140656	1.1613	0.252266	0.628392
Q9DCT2	NADH dehydrogenase [ubiquinone] iron-sulfur protein 3, mitochondrial	Ndufs3	-0.0971193	-1.16137	0.252235	0.628392
Q9R0P3	S-formylglutathione hydrolase	Esd	-0.10272	-1.15902	0.253183	0.628392
Q91W53	Golgin subfamily A member 7	Golga7	0.164433	1.15723	0.253904	0.62844
Q9ESM3	Hyaluronan and proteoglycan link protein 2	Hapln2	0.2866	1.15757	0.253768	0.62844
Q9QXL2	Kinesin-like protein KIF21A	Kif21a	-0.0865825	-1.15665	0.25414	0.628587
P97393	Rho GTPase-activating protein 5	Arhgap5	-0.195096	-1.15393	0.255241	0.63044
Q3UPC7	Uncharacterized protein KIAA0825 homolog		-0.113774	-1.15424	0.255113	0.63044
Q80WS3	rRNA/tRNA 2-O-methyltransferase fibrillarin-like protein 1	Fbll1	-0.192062	-1.15252	0.255811	0.631411
Q5EBG8	Uncharacterized protein C1orf50 homolog		0.274602	1.15035	0.256695	0.633158
Q64133	Amine oxidase [flavin-containing] A	Maoa	0.0813794	1.14922	0.257154	0.633853
P40142	Transketolase	Tkt	0.0791331	1.14398	0.259296	0.637815
Q64373	Bcl-2-like protein 1	Bcl2l1	0.141561	1.14413	0.259233	0.637815
Q9CPX8	Cytochrome b-c1 complex subunit 10	Uqcr11	-0.19557	-1.14475	0.25898	0.637815
P53996	Cellular nucleic acid-binding protein	Cnbp	-0.324698	-1.14197	0.260121	0.638528
Q6NVE8	WD repeat-containing protein 44	Wdr44	-0.214571	-1.14223	0.260014	0.638528
Q8VIM9	Immunity-related GTPase family Q protein	Irgq	-0.258771	-1.14277	0.259793	0.638528
Q9Z0V7	Mitochondrial import inner membrane translocase subunit Tim17-B	Timm17b	-0.222282	-1.13918	0.261269	0.640906
Q91VJ5	Polyglutamine-binding protein 1	Pqbp1	-0.213972	-1.13635	0.262436	0.643327
P56565	Protein S100-A1	S100a1	0.246929	1.1352	0.262912	0.644054
O08989	Ras-related protein M-Ras	Mras	0.157737	1.13279	0.26391	0.645046
P59764	Dedicator of cytokinesis protein 4	Dock4	-0.0882995	-1.1322	0.264157	0.645046
Q7TMF3	NADH dehydrogenase [ubiquinone] 1 alpha subcomplex subunit 12	Ndufa12	-0.107234	-1.13219	0.26416	0.645046
Q8VE22	28S ribosomal protein S23, mitochondrial	Mrps23	0.221772	1.13306	0.263798	0.645046
Q9D7I5	Phospholysine phosphohistidine inorganic pyrophosphate phosphatase	Lhpp	0.318705	1.13205	0.264219	0.645046
Q61789	Laminin subunit alpha-3	Lama3	-0.266339	-1.13133	0.264518	0.645337
P62069;Q9D9M2	Ubiquitin carboxyl-terminal hydrolase 46;Ubiquitin carboxyl-terminal hydrolase 12	Usp46;Usp12	0.26359	1.1304	0.264904	0.645399
Q9D7A8	Armadillo repeat-containing protein 1	Armc1	0.199221	1.13066	0.264795	0.645399
Q8BWF0	Succinate-semialdehyde dehydrogenase, mitochondrial	Aldh5a1	-0.0713436	-1.12947	0.265291	0.645463
Q8K2J0	1-phosphatidylinositol 4,5-bisphosphate phosphodiesterase delta-3	Plcd3	-0.287933	-1.12967	0.265211	0.645463
Q8BU33	Acetolactate synthase-like protein	Ilvbl	-0.206318	-1.12901	0.265485	0.645498
Q9D0B5	Thiosulfate sulfurtransferase/rhodanese-like domain-containing protein 3	Tstd3	0.227333	1.12753	0.266103	0.64656
Q62422	Osteoclast-stimulating factor 1	Ostf1	0.28628	1.12695	0.266344	0.646706
Q62077	1-phosphatidylinositol 4,5-bisphosphate phosphodiesterase gamma-1	Plcg1	-0.18898	-1.12361	0.267743	0.649662
P51175	Protoporphyrinogen oxidase	Ppox	-0.164469	-1.12088	0.26889	0.650241
Q6ZPU9	KIF1-binding protein	Kbp	0.144726	1.12165	0.268563	0.650241
Q9CQA3	Succinate dehydrogenase [ubiquinone] iron-sulfur subunit, mitochondrial	Sdhb	-0.0847613	-1.12112	0.268787	0.650241
Q9D7P6	Iron-sulfur cluster assembly enzyme ISCU, mitochondrial	Iscu	-0.21691	-1.12146	0.268647	0.650241
Q9EQS3	C-Myc-binding protein	Mycbp	-0.263006	-1.12239	0.268254	0.650241
D3YZP9	Coiled-coil domain-containing protein 6	Ccdc6	0.379834	1.11868	0.269814	0.651155
Q6PD03	Serine/threonine-protein phosphatase 2A 56 kDa regulatory subunit alpha isoform	Ppp2r5a	-0.182532	-1.11888	0.269732	0.651155
Q7TPR4	Alpha-actinin-1	Actn1	-0.0900445	-1.11932	0.269544	0.651155
B0V2N1	Receptor-type tyrosine-protein phosphatase S	Ptprs	-0.0818938	-1.11688	0.270574	0.651495
O89112	LanC-like protein 1	Lancl1	-0.133284	-1.11727	0.270412	0.651495
P81117	Nucleobindin-2;Nesfatin-1	Nucb2	0.216214	1.11663	0.270683	0.651495
Q8CH09	SURP and G-patch domain-containing protein 2	Sugp2	0.206553	1.11763	0.270257	0.651495
Q7M750	Opalin	Opalin	-0.2335	-1.11613	0.270891	0.651559
O35188	Fractalkine;Processed fractalkine	Cx3cl1	-0.214864	-1.11004	0.273476	0.651856
P56380	Bis(5-nucleosyl)-tetraphosphatase [asymmetrical]	Nudt2	-0.166706	-1.115	0.27137	0.651856
P56959	RNA-binding protein FUS	Fus	0.216351	1.11258	0.272398	0.651856
Q3U898	Myeloma-overexpressed gene 2 protein homolog	Myeov2	0.231948	1.11341	0.272044	0.651856
Q61545	RNA-binding protein EWS	Ewsr1	-0.130937	-1.1105	0.273282	0.651856
Q68FD9	UPF0606 protein KIAA1549	Kiaa1549	0.185282	1.11328	0.272101	0.651856
Q6P3D0	U8 snoRNA-decapping enzyme	Nudt16	0.223525	1.11297	0.272233	0.651856
Q80U28	MAP kinase-activating death domain protein	Madd	-0.0846155	-1.11167	0.272782	0.651856
Q80VD1	Protein FAM98B	Fam98b	-0.0824064	-1.11486	0.271432	0.651856
Q8CIG8	Protein arginine N-methyltransferase 5	Prmt5	-0.11833	-1.1125	0.272429	0.651856
Q925I1	ATPase family AAA domain-containing protein 3	Atad3	-0.130181	-1.10983	0.273565	0.651856
Q9CQ65	S-methyl-5-thioadenosine phosphorylase	Mtap	-0.222332	-1.1102	0.27341	0.651856
Q9JL04	Formin-2	Fmn2	0.197619	1.11057	0.27325	0.651856
Q9JLZ3	Methylglutaconyl-CoA hydratase, mitochondrial	Auh	-0.105322	-1.11075	0.273174	0.651856
P63250	G protein-activated inward rectifier potassium channel 1	Kcnj3	0.228463	1.1091	0.273879	0.652171
Q6VNS1	NT-3 growth factor receptor	Ntrk3	-0.126907	-1.10848	0.274141	0.652361
P62751	60S ribosomal protein L23a	Rpl23a	0.393086	1.10692	0.274809	0.652649
Q8C0D5	Elongation factor Tu GTP-binding domain-containing protein 1	Eftud1	-0.182574	-1.10649	0.274992	0.652649
Q9D0M3	Cytochrome c1, heme protein, mitochondrial	Cyc1	-0.0878233	-1.10719	0.274693	0.652649
Q9R257	Heme-binding protein 1	Hebp1	0.205312	1.10681	0.274857	0.652649
Q7TPS5	C2 domain-containing protein 5	C2cd5	-0.196463	-1.10598	0.275208	0.65273
Q8R1Q8	Cytoplasmic dynein 1 light intermediate chain 1	Dync1li1	0.0788957	1.10451	0.275841	0.653797
P56371	Ras-related protein Rab-4A	Rab4a	0.170087	1.10373	0.276173	0.654152
Q9D7N3	28S ribosomal protein S9, mitochondrial	Mrps9	-0.195742	-1.10303	0.276474	0.654431
P56395	Cytochrome b5	Cyb5a	0.0961385	1.10132	0.277208	0.6555
Q8C0P5	Coronin-2A	Coro2a	-0.15795	-1.10112	0.277292	0.6555
P0DP28;P0DP27;P0DP26;P20801			-0.119812	-1.10025	0.277669	0.655958
A2AJI0	MAP7 domain-containing protein 1	Map7d1	0.112294	1.09965	0.277927	0.656136
Q923T9	Calcium/calmodulin-dependent protein kinase type II subunit gamma	Camk2g	-0.0984553	-1.09904	0.278189	0.656321
P62911	60S ribosomal protein L32	Rpl32	0.18379	1.09836	0.278484	0.656583
P28741;P33174	Kinesin-like protein KIF3A	Kif3a	0.276582	1.09517	0.279862	0.65853
P62311	U6 snRNA-associated Sm-like protein LSm3	Lsm3	-0.204794	-1.09587	0.279559	0.65853
Q6PEE3	Ribonucleoside-diphosphate reductase subunit M2 B	Rrm2b	0.261347	1.09531	0.279801	0.65853
P26043	Radixin	Rdx	0.137583	1.09474	0.280046	0.658532
P62301	40S ribosomal protein S13	Rps13	0.144697	1.09088	0.28172	0.661026
Q8BGS2	BolA-like protein 2	Bola2	0.222802	1.09017	0.28203	0.661026
Q8R422	CD109 antigen	Cd109	-0.182615	-1.09038	0.281938	0.661026
Q91XD7	Cysteine-rich with EGF-like domain protein 1	Creld1	-0.0825535	-1.0912	0.281582	0.661026
Q9CPQ8	ATP synthase subunit g, mitochondrial	Atp5l	-0.122865	-1.09066	0.281816	0.661026
Q59J78	Mimitin, mitochondrial	Ndufaf2	-0.144713	-1.08894	0.282566	0.661849
Q8C854	Myelin expression factor 2	Myef2	0.127125	1.08753	0.283183	0.662427
Q9CRB9	MICOS complex subunit Mic19	Chchd3	-0.0981119	-1.08769	0.283113	0.662427
P97772	Metabotropic glutamate receptor 1	Grm1	-0.142406	-1.08622	0.283754	0.663175
Q8R317	Ubiquilin-1	Ubqln1	-0.186876	-1.08594	0.283874	0.663175
Q04447	Creatine kinase B-type	Ckb	-0.0741864	-1.08535	0.284135	0.663209
Q6DFW4	Nucleolar protein 58	Nop58	0.220471	1.08506	0.284259	0.663209
P46978	Dolichyl-diphosphooligosaccharide--protein glycosyltransferase subunit STT3A	Stt3a	0.150732	1.08441	0.284546	0.663447
P68254	14-3-3 protein theta	Ywhaq	-0.0694906	-1.08385	0.284788	0.663579
Q62083	PRKCA-binding protein	Pick1	-0.210828	-1.08337	0.284999	0.663637
E9Q7G0		Numa1	-0.302406	-1.0824	0.285425	0.663757
Q61739	Integrin alpha-6;Integrin alpha-6 heavy chain;Integrin alpha-6 light chain	Itga6	0.22088	1.08239	0.285431	0.663757
Q9CQX2	Cytochrome b5 type B	Cyb5b	-0.488501	-1.08199	0.285606	0.663757
Q14C51	Pentatricopeptide repeat domain-containing protein 3, mitochondrial	Ptcd3	0.193504	1.08063	0.286206	0.664344
Q8K2Q7	BRO1 domain-containing protein BROX	Brox	0.18586	1.08057	0.28623	0.664344
O70310	Glycylpeptide N-tetradecanoyltransferase 1	Nmt1	0.108796	1.07758	0.287546	0.665017
P14873	Microtubule-associated protein 1B;MAP1B heavy chain;MAP1 light chain LC1	Map1b	-0.0701928	-1.07792	0.287398	0.665017
P21278	Guanine nucleotide-binding protein subunit alpha-11	Gna11	-0.139031	-1.07658	0.28799	0.665017
P35486	Pyruvate dehydrogenase E1 component subunit alpha, somatic form, mitochondrial	Pdha1	-0.0823446	-1.07707	0.287773	0.665017
P50429	Arylsulfatase B	Arsb	0.191269	1.07659	0.287984	0.665017
P63030	Mitochondrial pyruvate carrier 1	Mpc1	0.307899	1.07654	0.288007	0.665017
Q9ER72	Cysteine--tRNA ligase, cytoplasmic	Cars	0.143038	1.07856	0.287117	0.665017
Q9WV60	Glycogen synthase kinase-3 beta	Gsk3b	-0.0921927	-1.07805	0.287342	0.665017
Q91YR1	Twinfilin-1	Twf1	0.1464	1.07606	0.288217	0.665073
P13634	Carbonic anhydrase 1	Ca1	-0.37029	-1.07562	0.288413	0.665096
O55033	Cytoplasmic protein NCK2	Nck2	0.144194	1.07439	0.288955	0.665332
P51881	ADP/ATP translocase 2;ADP/ATP translocase 2, N-terminally processed	Slc25a5	-0.0734419	-1.07371	0.289259	0.665332
Q62376	U1 small nuclear ribonucleoprotein 70 kDa	Snrnp70	-0.0843955	-1.07478	0.288783	0.665332
Q9R269	Periplakin	Ppl	0.323106	1.07385	0.289194	0.665332
P28658	Ataxin-10	Atxn10	0.166376	1.07149	0.290241	0.665657
P97333	Neuropilin-1	Nrp1	0.134282	1.07183	0.290093	0.665657
Q8CE50	Sorting nexin-30	Snx30	0.168821	1.07087	0.290516	0.665657
Q8R180	ERO1-like protein alpha	Ero1l	-0.375684	-1.0719	0.290058	0.665657
Q8R5L3	Vam6/Vps39-like protein	Vps39	0.177162	1.07193	0.290049	0.665657
Q922J6	Tetraspanin-2	Tspan2	-0.223601	-1.07126	0.290346	0.665657
Q9JJC6	RILP-like protein 1	Rilpl1	0.164819	1.06905	0.291326	0.667086
Q8BLF1	Neutral cholesterol ester hydrolase 1	Nceh1	-0.113096	-1.06808	0.291758	0.667649
P63037	DnaJ homolog subfamily A member 1	Dnaja1	0.0659212	1.06716	0.292168	0.66816
Q3UJU9	Regulator of microtubule dynamics protein 3	Rmdn3	0.133103	1.06558	0.292876	0.669079
Q9WUA3	ATP-dependent 6-phosphofructokinase, platelet type	Pfkp	-0.0685169	-1.06542	0.292944	0.669079
Q9Z2W9	Glutamate receptor 3	Gria3	-0.132676	-1.06444	0.293383	0.669654
Q99L20		Gstt3	-0.209299	-1.06261	0.294203	0.671097
Q60902	Epidermal growth factor receptor substrate 15-like 1	Eps15l1	-0.092964	-1.05869	0.295966	0.673831
Q8BMF3	NADP-dependent malic enzyme, mitochondrial	Me3	-0.325523	-1.05906	0.295798	0.673831
Q923Z3	Protein MTO1 homolog, mitochondrial	Mto1	-0.243275	-1.05891	0.295864	0.673831
Q9Z1S3	RAS guanyl-releasing protein 1	Rasgrp1	-0.149622	-1.05781	0.29636	0.674299
A2CG63	AT-rich interactive domain-containing protein 4B	Arid4b	-0.129573	-1.05588	0.297231	0.674432
E9Q8I9	Protein furry homolog	Fry	-0.197341	-1.05105	0.299416	0.674432
P62281	40S ribosomal protein S11	Rps11	-0.22026	-1.05252	0.298751	0.674432
P97461	40S ribosomal protein S5;40S ribosomal protein S5, N-terminally processed	Rps5	-0.106319	-1.05312	0.298479	0.674432
Q3U1J4	DNA damage-binding protein 1	Ddb1	-0.100706	-1.052	0.298986	0.674432
Q61037	Tuberin	Tsc2	-0.164745	-1.05535	0.29747	0.674432
Q62393	Tumor protein D52	Tpd52	0.182094	1.05511	0.29758	0.674432
Q6P5F6	Zinc transporter ZIP10	Slc39a10	0.258301	1.05389	0.29813	0.674432
Q8BXK8	Arf-GAP with GTPase, ANK repeat and PH domain-containing protein 1	Agap1	0.172077	1.05389	0.298129	0.674432
Q8BYL4	Tyrosine--tRNA ligase, mitochondrial	Yars2	-0.198614	-1.05087	0.299497	0.674432
Q8QZT2	Centriole, cilia and spindle-associated protein	Ccsap	-0.153051	-1.05398	0.29809	0.674432
Q8VCV1	Alpha/beta hydrolase domain-containing protein 17C	Abhd17c	-0.201006	-1.0506	0.299622	0.674432
Q8VD33	Small glutamine-rich tetratricopeptide repeat-containing protein beta	Sgtb	-0.138305	-1.05177	0.299091	0.674432
Q99KV1	DnaJ homolog subfamily B member 11	Dnajb11	0.156659	1.05142	0.299249	0.674432
Q99M51	Cytoplasmic protein NCK1	Nck1	-0.172458	-1.05677	0.29683	0.674432
Q9CQR4	Acyl-coenzyme A thioesterase 13;Acyl-coenzyme A thioesterase 13, N-terminally processed	Acot13	0.136285	1.05297	0.298547	0.674432
Q9CXS4	Centromere protein V	Cenpv	-0.115865	-1.05355	0.298286	0.674432
O54865	Guanylate cyclase soluble subunit beta-1	Gucy1b3	-0.166023	-1.04979	0.299991	0.674756
Q60676	Serine/threonine-protein phosphatase 5	Ppp5c	-0.0682232	-1.04904	0.300331	0.674756
Q9Z2A0	3-phosphoinositide-dependent protein kinase 1	Pdpk1	0.212971	1.04925	0.300234	0.674756
Q02257	Junction plakoglobin	Jup	0.213621	1.04862	0.300523	0.674763
P97412	Lysosomal-trafficking regulator	Lyst	0.157233	1.04759	0.300989	0.675386
Q9D7S7	60S ribosomal protein L22-like 1	Rpl22l1	0.312084	1.04672	0.301385	0.67585
O70493	Sorting nexin-12	Snx12	-0.0840453	-1.04503	0.302158	0.676198
P50518;Q9D593	V-type proton ATPase subunit E 1	Atp6v1e1	-0.0591586	-1.0455	0.301941	0.676198
P61982	14-3-3 protein gamma;14-3-3 protein gamma, N-terminally processed	Ywhag	-0.103969	-1.04431	0.302485	0.676198
Q8BJU0	Small glutamine-rich tetratricopeptide repeat-containing protein alpha	Sgta	-0.0984278	-1.04463	0.30234	0.676198
Q8BTY8	Sec1 family domain-containing protein 2	Scfd2	-0.217599	-1.04543	0.301976	0.676198
P50580	Proliferation-associated protein 2G4	Pa2g4	0.0881275	1.04379	0.302723	0.676308
P62192	26S protease regulatory subunit 4	Psmc1	0.0942055	1.04321	0.302987	0.676476
P62082	40S ribosomal protein S7	Rps7	0.106626	1.04109	0.303959	0.678222
Q9CX86	Heterogeneous nuclear ribonucleoprotein A0	Hnrnpa0	0.20133	1.03997	0.304473	0.678946
Q9CPU2	NADH dehydrogenase [ubiquinone] 1 beta subcomplex subunit 2, mitochondrial	Ndufb2	-0.130958	-1.03878	0.305021	0.679744
Q8K021	Secretory carrier-associated membrane protein 1	Scamp1	-0.0654798	-1.03768	0.305528	0.68045
P24549;O35945	Retinal dehydrogenase 1	Aldh1a1	-0.262845	-1.03657	0.306038	0.680741
Q8JZN7	Mitochondrial Rho GTPase 2	Rhot2	0.176218	1.03671	0.305974	0.680741
O70133	ATP-dependent RNA helicase A	Dhx9	-0.0730283	-1.03437	0.307052	0.681596
Q6NZM9	Histone deacetylase 4	Hdac4	-0.212838	-1.03489	0.306813	0.681596
Q8BUM6	Protein FAM163B	Fam163b	-0.183136	-1.03503	0.306746	0.681596
Q9CQ62	2,4-dienoyl-CoA reductase, mitochondrial	Decr1	0.114889	1.03408	0.307185	0.681596
Q99MB7	RING finger protein 141	Rnf141	-0.147665	-1.03317	0.307607	0.68211
P00405	Cytochrome c oxidase subunit 2	Mtco2	-0.0950895	-1.02762	0.310179	0.682565
P39087	Glutamate receptor ionotropic, kainate 2	Grik2	0.508194	1.02873	0.309663	0.682565
P42669	Transcriptional activator protein Pur-alpha	Pura	-0.0859189	-1.02948	0.309316	0.682565
P60469	Liprin-alpha-3	Ppfia3	-0.0825702	-1.02663	0.310637	0.682565
P62774	Myotrophin	Mtpn	-0.0900118	-1.02356	0.312068	0.682565
P63087	Serine/threonine-protein phosphatase PP1-gamma catalytic subunit	Ppp1cc	-0.130213	-1.02048	0.313509	0.682565
P68037	Ubiquitin-conjugating enzyme E2 L3	Ube2l3	0.125155	1.03017	0.308994	0.682565
P70288	Histone deacetylase 2	Hdac2	0.134083	1.0268	0.310558	0.682565
P70408	Cadherin-10	Cdh10	-0.151332	-1.02397	0.311877	0.682565
Q3UPH1	Protein PRRC1	Prrc1	0.162894	1.02494	0.311426	0.682565
Q5SSL4	Active breakpoint cluster region-related protein	Abr	-0.0784537	-1.02855	0.309745	0.682565
Q60780	Growth arrest-specific protein 7	Gas7	-0.171908	-1.02116	0.313189	0.682565
Q60936	Atypical kinase ADCK3, mitochondrial	Adck3	0.350628	1.03226	0.308025	0.682565
Q62465	Synaptic vesicle membrane protein VAT-1 homolog	Vat1	0.096621	1.02121	0.313166	0.682565
Q6A065	Centrosomal protein of 170 kDa	Cep170	-0.131375	-1.03069	0.308753	0.682565
Q6P1D5	Seizure 6-like protein	Sez6l	0.172815	1.02078	0.313371	0.682565
Q6P5U7	NACHT and WD repeat domain-containing protein 2	Nwd2	-0.235871	-1.02779	0.310101	0.682565
Q80TM9	Nischarin	Nisch	-0.12115	-1.03185	0.308215	0.682565
Q80U35	Rho guanine nucleotide exchange factor 17	Arhgef17	0.188988	1.02748	0.310241	0.682565
Q8BH44	Coronin-2B	Coro2b	-0.0893367	-1.02321	0.312231	0.682565
Q8BTM8	Filamin-A	Flna	0.251019	1.0265	0.310702	0.682565
Q8CC27	Voltage-dependent L-type calcium channel subunit beta-2	Cacnb2	0.156854	1.02088	0.313322	0.682565
Q91YS8	Calcium/calmodulin-dependent protein kinase type 1	Camk1	-0.170328	-1.02538	0.311221	0.682565
Q99K85	Phosphoserine aminotransferase	Psat1	0.0853444	1.0209	0.313313	0.682565
Q9CQT7	Desumoylating isopeptidase 1	Desi1	0.230489	1.02273	0.312457	0.682565
Q9CRC9	Glucosamine-6-phosphate isomerase 2	Gnpda2	-0.189334	-1.02681	0.310557	0.682565
Q9CWZ7	Gamma-soluble NSF attachment protein	Napg	-0.0739058	-1.03112	0.308552	0.682565
Q9QYC0	Alpha-adducin	Add1	-0.0618411	-1.02043	0.313534	0.682565
Q9Z1M8	Protein Red	Ik	0.233181	1.02494	0.311425	0.682565
Q9Z2U0;Q9CWH6	Proteasome subunit alpha type-7	Psma7	-0.0723009	-1.02328	0.312199	0.682565
D3Z7Q2		Smim20	-0.104905	-1.01926	0.314084	0.682932
P49070	Calcium signal-modulating cyclophilin ligand	Camlg	-0.134644	-1.01956	0.31394	0.682932
O09061	Proteasome subunit beta type-1	Psmb1	-0.0660414	-1.01831	0.31453	0.682978
P97823	Acyl-protein thioesterase 1	Lypla1	0.151891	1.01802	0.314661	0.682978
Q9ESN6	Tripartite motif-containing protein 2	Trim2	-0.0558797	-1.01799	0.314678	0.682978
Q3UHD1	Brain-specific angiogenesis inhibitor 1	Bai1	-0.246663	-1.01655	0.315352	0.684028
P33175	Kinesin heavy chain isoform 5A	Kif5a	-0.132553	-1.01552	0.31584	0.684257
Q9CRY7	Glycerophosphodiester phosphodiesterase domain-containing protein 1	Gdpd1	0.132598	1.01591	0.315654	0.684257
Q8CH72	E3 ubiquitin-protein ligase TRIM32	Trim32	-0.19162	-1.01463	0.316258	0.684748
P16014	Secretogranin-1;CCB peptide;PE-11	Chgb	0.164681	1.01362	0.316735	0.685365
Q8R313	Exocyst complex component 6	Exoc6	-0.156128	-1.01314	0.316961	0.68544
Q8BG73	SH3 domain-binding glutamic acid-rich-like protein 2	Sh3bgrl2	-0.126194	-1.0121	0.317452	0.686087
Q6P8X1	Sorting nexin-6;Sorting nexin-6, N-terminally processed	Snx6	0.122191	1.00986	0.318508	0.687539
Q8BMK4	Cytoskeleton-associated protein 4	Ckap4	0.133072	1.01012	0.318387	0.687539
A2ASZ8	Calcium-binding mitochondrial carrier protein SCaMC-2	Slc25a25	-0.148283	-1.00776	0.319507	0.689261
Q9Z0V8	Mitochondrial import inner membrane translocase subunit Tim17-A	Timm17a	0.199925	1.00737	0.319691	0.689261
P70211	Netrin receptor DCC	Dcc	-0.143659	-1.00603	0.320326	0.689957
P70257	Nuclear factor 1 X-type	Nfix	0.190761	1.00533	0.32066	0.689957
Q8C079	Striatin-interacting protein 1	Strip1	-0.176197	-1.00581	0.32043	0.689957
Q8JZW4	Copine-5	Cpne5	-0.188316	-1.00507	0.320785	0.689957
P17183	Gamma-enolase	Eno2	-0.0672101	-1.00347	0.321546	0.690104
Q6P9K9;Q8C985	Neurexin-3	Nrxn3	-0.065624	-1.0033	0.321624	0.690104
Q99KY4	Cyclin-G-associated kinase	Gak	-0.123254	-1.00402	0.321283	0.690104
Q9R1V6	Disintegrin and metalloproteinase domain-containing protein 22	Adam22	-0.0805758	-1.00333	0.321612	0.690104
P70404	Isocitrate dehydrogenase [NAD] subunit gamma 1, mitochondrial	Idh3g	-0.0890553	-1.00275	0.321886	0.690252
Q3U1F9	Phosphoprotein associated with glycosphingolipid-enriched microdomains 1	Pag1	0.204155	1.00148	0.322493	0.690767
Q9CPR5	39S ribosomal protein L15, mitochondrial	Mrpl15	0.182044	1.00144	0.322512	0.690767
Q68EF6	Brain-enriched guanylate kinase-associated protein	Begain	-0.285749	-1.00031	0.323052	0.69151
Q7TNC4	Putative RNA-binding protein Luc7-like 2	Luc7l2	-0.127587	-0.999373	0.323501	0.692055
P24472	Glutathione S-transferase A4	Gsta4	-0.0888157	-0.995859	0.325184	0.69211
Q8BGX2	Uncharacterized protein C19orf52 homolog		0.309918	0.99805	0.324134	0.69211
Q8BJZ4	28S ribosomal protein S35, mitochondrial	Mrps35	-0.199953	-0.998335	0.323997	0.69211
Q8C0D4	Rho GTPase-activating protein 12	Arhgap12	-0.190269	-0.996083	0.325077	0.69211
Q8VEK0;Q8BHG3	Cell cycle control protein 50A	Tmem30a	0.116615	0.995286	0.32546	0.69211
Q91ZM2;Q9JID9	SH2B adapter protein 1	Sh2b1	-0.150901	-0.996183	0.325029	0.69211
Q9CWM4	Prefoldin subunit 1	Pfdn1	0.312732	0.996312	0.324967	0.69211
Q9D7G0	Ribose-phosphate pyrophosphokinase 1	Prps1	-0.163526	-0.997304	0.324491	0.69211
Q9QZ23	NFU1 iron-sulfur cluster scaffold homolog, mitochondrial	Nfu1	-0.127534	-0.99532	0.325443	0.69211
Q9WVE8	Protein kinase C and casein kinase substrate in neurons protein 2	Pacsin2	-0.109841	-0.995761	0.325231	0.69211
P22315	Ferrochelatase, mitochondrial	Fech	-0.100016	-0.994496	0.325839	0.692229
Q9QUI0	Transforming protein RhoA	Rhoa	-0.0739462	-0.994363	0.325903	0.692229
Q9CR57	60S ribosomal protein L14	Rpl14	0.186139	0.993251	0.326438	0.692955
Q9CR98	Protein FAM136A	Fam136a	0.109704	0.992745	0.326682	0.693061
O35129	Prohibitin-2	Phb2	0.072813	0.983054	0.331371	0.69606
P28474;Q64437	Alcohol dehydrogenase class-3	Adh5	0.100016	0.98299	0.331402	0.69606
P62482	Voltage-gated potassium channel subunit beta-2	Kcnab2	-0.110856	-0.986379	0.329757	0.69606
P97364	Selenide, water dikinase 2	Sephs2	-0.273211	-0.984063	0.33088	0.69606
P97863	Nuclear factor 1 B-type	Nfib	-0.184577	-0.985072	0.33039	0.69606
Q3U0M1	Trafficking protein particle complex subunit 9	Trappc9	-0.154818	-0.982995	0.331399	0.69606
Q61481	Calcium/calmodulin-dependent 3,5-cyclic nucleotide phosphodiesterase 1A	Pde1a	-0.124433	-0.984959	0.330446	0.69606
Q62048	Astrocytic phosphoprotein PEA-15	Pea15	0.108835	0.98326	0.33127	0.69606
Q64322	Neural proliferation differentiation and control protein 1	Npdc1	0.255479	0.987162	0.329378	0.69606
Q7TPM6	Fibronectin type III and SPRY domain-containing protein 1	Fsd1	-0.128473	-0.987063	0.329426	0.69606
Q80X80	C2 domain-containing protein 2-like	C2cd2l	0.112194	0.984969	0.330441	0.69606
Q8BXV2	BRI3-binding protein	Bri3bp	-0.224123	-0.986962	0.329474	0.69606
Q8CCF0	U4/U6 small nuclear ribonucleoprotein Prp31	Prpf31	0.173023	0.985861	0.330008	0.69606
Q8R570	Synaptosomal-associated protein 47	Snap47	0.0696967	0.988532	0.328715	0.69606
Q9JIX8	Apoptotic chromatin condensation inducer in the nucleus	Acin1	-0.223454	-0.985743	0.330065	0.69606
Q9R062	Glycogenin-1	Gyg1	0.119123	0.98377	0.331023	0.69606
Q9Z2A5	Arginyl-tRNA--protein transferase 1	Ate1	-0.180575	-0.988131	0.328909	0.69606
Q99KK7	Dipeptidyl peptidase 3	Dpp3	0.0996788	0.982302	0.331736	0.696354
Q9CPR4	60S ribosomal protein L17	Rpl17	0.234692	0.980929	0.332405	0.696925
Q9CZN7;P50431	Serine hydroxymethyltransferase	Shmt2	-0.14016	-0.980544	0.332592	0.696925
Q9D8W7	OCIA domain-containing protein 2	Ociad2	-0.255505	-0.980706	0.332514	0.696925
O54983	Ketimine reductase mu-crystallin	Crym	-0.097238	-0.979672	0.333018	0.697072
Q6ZQ82	Rho GTPase-activating protein 26	Arhgap26	0.241818	0.979107	0.333293	0.697072
Q9CQ79	Thioredoxin domain-containing protein 9	Txndc9	0.278977	0.979599	0.333054	0.697072
Q9DBT5	AMP deaminase 2	Ampd2	0.144898	0.978804	0.333442	0.697072
Q91V12	Cytosolic acyl coenzyme A thioester hydrolase	Acot7	0.0828441	0.977085	0.334281	0.698419
Q9JHQ5	Leucine zipper transcription factor-like protein 1	Lztfl1	0.190799	0.976563	0.334537	0.698546
P60335	Poly(rC)-binding protein 1	Pcbp1	-0.0698379	-0.974729	0.335435	0.698954
Q3V132	ADP/ATP translocase 4;ADP/ATP translocase 4, N-terminally processed	Slc25a31	0.197444	0.973771	0.335904	0.698954
Q8BTY1	Kynurenine--oxoglutarate transaminase 1	Ccbl1	-0.14937	-0.97535	0.33513	0.698954
Q8R5J9	PRA1 family protein 3	Arl6ip5	-0.0924222	-0.973979	0.335803	0.698954
Q91WJ8	Far upstream element-binding protein 1	Fubp1	-0.136096	-0.97409	0.335748	0.698954
Q9EPK2	Protein XRP2	Rp2	0.172899	0.974188	0.3357	0.698954
Q8CGC7	Bifunctional glutamate/proline--tRNA ligase;Glutamate--tRNA ligase;Proline--tRNA ligase	Eprs	0.0743444	0.971904	0.336821	0.700455
Q71RI9	Kynurenine--oxoglutarate transaminase 3	Ccbl2	-0.153348	-0.970956	0.337287	0.701017
Q8R0W0	Epiplakin	Eppk1	0.254934	0.969459	0.338025	0.702142
Q6PDS3	Sterile alpha and TIR motif-containing protein 1	Sarm1	-0.144237	-0.968071	0.338709	0.702491
Q8BFZ3	Beta-actin-like protein 2	Actbl2	-2.42304	-0.96864	0.338428	0.702491
Q9D379	Epoxide hydrolase 1	Ephx1	0.148486	0.967617	0.338933	0.702491
Q9JLN9	Serine/threonine-protein kinase mTOR	Mtor	-0.134852	-0.967525	0.338978	0.702491
D3YVF0	A-kinase anchor protein 5	Akap5	-0.130118	-0.965478	0.33999	0.703204
Q64332	Synapsin-2	Syn2	-0.0548721	-0.965665	0.339897	0.703204
Q99JP6	Homer protein homolog 3	Homer3	-0.274952	-0.964923	0.340264	0.703204
Q9CPZ8	COX assembly mitochondrial protein homolog	Cmc1	0.19394	0.966172	0.339646	0.703204
Q9CQ69	Cytochrome b-c1 complex subunit 8	Uqcrq	-0.152193	-0.964842	0.340305	0.703204
P07759;P29621;Q5I2A0;Q80X76	Serine protease inhibitor A3K	Serpina3k	0.445301	0.962567	0.341431	0.704055
P68433	Histone H3.1	Hist1h3a	0.240052	0.961311	0.342055	0.704055
Q04750	DNA topoisomerase 1	Top1	0.148074	0.961404	0.342009	0.704055
Q05920	Pyruvate carboxylase, mitochondrial	Pc	-0.0646928	-0.962052	0.341687	0.704055
Q9D4H1	Exocyst complex component 2	Exoc2	0.131025	0.962748	0.341342	0.704055
Q9QXB9	Developmentally-regulated GTP-binding protein 2	Drg2	0.140349	0.961233	0.342093	0.704055
Q9WTQ5	A-kinase anchor protein 12	Akap12	-0.144408	-0.963128	0.341153	0.704055
P08228	Superoxide dismutase [Cu-Zn]	Sod1	-0.151671	-0.960711	0.342353	0.704184
P97447	Four and a half LIM domains protein 1	Fhl1	0.0798552	0.957804	0.343799	0.706516
Q03958	Prefoldin subunit 6	Pfdn6	0.117002	0.957272	0.344064	0.706516
Q61595	Kinectin	Ktn1	-0.1795	-0.957243	0.344079	0.706516
Q62283	Tetraspanin-7	Tspan7	-0.12619	-0.956663	0.344368	0.706705
O35593	26S proteasome non-ATPase regulatory subunit 14	Psmd14	0.10855	0.955856	0.344771	0.707126
Q9R013	Cathepsin F	Ctsf	0.124523	0.954186	0.345605	0.708431
Q6PIE5;Q9Z1W8	Sodium/potassium-transporting ATPase subunit alpha-2	Atp1a2	0.0631365	0.953581	0.345908	0.708483
Q6Y7W8	PERQ amino acid-rich with GYF domain-containing protein 2	Gigyf2	0.177707	0.953136	0.34613	0.708483
Q9CZ44	NSFL1 cofactor p47	Nsfl1c	-0.0725587	-0.952948	0.346224	0.708483
Q80VP1	Epsin-1	Epn1	-0.103352	-0.952012	0.346693	0.709037
Q8VCM7	Fibrinogen gamma chain	Fgg	0.27596	0.950318	0.347542	0.710368
O35633	Vesicular inhibitory amino acid transporter	Slc32a1	0.156271	0.948735	0.348337	0.71126
Q8R574	Phosphoribosyl pyrophosphate synthase-associated protein 2	Prpsap2	-0.108476	-0.948658	0.348376	0.71126
Q3UGF1	WD repeat-containing protein 19	Wdr19	0.186583	0.947712	0.348852	0.711825
Q69ZK0	Phosphatidylinositol 3,4,5-trisphosphate-dependent Rac exchanger 1 protein	Prex1	0.122395	0.944914	0.350262	0.714162
Q8BH66	Atlastin-1	Atl1	-0.0881389	-0.944646	0.350396	0.714162
P46061	Ran GTPase-activating protein 1	Rangap1	-0.135888	-0.943979	0.350734	0.714442
O35969	Guanidinoacetate N-methyltransferase	Gamt	-0.156261	-0.937758	0.353883	0.715669
P61924	Coatomer subunit zeta-1	Copz1	0.174621	0.94061	0.352437	0.715669
Q00493	Carboxypeptidase E	Cpe	0.092134	0.941042	0.352218	0.715669
Q3UMY5	Echinoderm microtubule-associated protein-like 4	Eml4	0.156758	0.936842	0.354349	0.715669
Q501J6	Probable ATP-dependent RNA helicase DDX17	Ddx17	0.103139	0.937984	0.353769	0.715669
Q61035;Q99KK9	Histidine--tRNA ligase, cytoplasmic	Hars	-0.147834	-0.936135	0.354708	0.715669
Q80TR1	Latrophilin-1	Lphn1	-0.0862304	-0.940537	0.352474	0.715669
Q80UU9	Membrane-associated progesterone receptor component 2	Pgrmc2	0.1906	0.940265	0.352612	0.715669
Q8BK08	Transmembrane protein 11, mitochondrial	Tmem11	0.309834	0.938743	0.353383	0.715669
Q8BK64;Q8N9S3	Activator of 90 kDa heat shock protein ATPase homolog 1	Ahsa1	0.0831213	0.93721	0.354162	0.715669
Q8BLV3	Sodium/hydrogen exchanger 7	Slc9a7	-0.18313	-0.941782	0.351844	0.715669
Q8BMJ2	Leucine--tRNA ligase, cytoplasmic	Lars	0.0814699	0.937262	0.354135	0.715669
Q8C080	Sorting nexin-16	Snx16	-0.119022	-0.939807	0.352844	0.715669
Q8CFI5	Probable proline--tRNA ligase, mitochondrial	Pars2	-0.160366	-0.940132	0.352679	0.715669
Q91XF0	Pyridoxine-5-phosphate oxidase	Pnpo	-0.247985	-0.935689	0.354935	0.715669
Q9D7V9	N-acylethanolamine-hydrolyzing acid amidase;N-acylethanolamine-hydrolyzing acid amidase subunit alpha;N-acylethanolamine-hydrolyzing acid amidase subunit beta	Naaa	0.202198	0.936084	0.354734	0.715669
Q9DCS3	Trans-2-enoyl-CoA reductase, mitochondrial	Mecr	-0.139932	-0.935726	0.354916	0.715669
Q9R1P1	Proteasome subunit beta type-3	Psmb3	0.155652	0.937594	0.353967	0.715669
P29341	Polyadenylate-binding protein 1	Pabpc1	-0.050242	-0.933949	0.355821	0.717052
P53994	Ras-related protein Rab-2A	Rab2a	0.0680432	0.932553	0.356533	0.718064
P70280	Vesicle-associated membrane protein 7	Vamp7	0.196872	0.931238	0.357204	0.718064
Q4VAE3	Transmembrane protein 65	Tmem65	0.173592	0.930999	0.357327	0.718064
Q8BXR1	Probable cationic amino acid transporter	Slc7a14	-0.103598	-0.931717	0.35696	0.718064
Q9DCH4	Eukaryotic translation initiation factor 3 subunit F	Eif3f	-0.143692	-0.932034	0.356798	0.718064
Q8CGK7	Guanine nucleotide-binding protein G(olf) subunit alpha	Gnal	-0.144526	-0.9302	0.357735	0.718481
Q9CYN9	Renin receptor	Atp6ap2	-0.150374	-0.929298	0.358197	0.719005
P06837	Neuromodulin	Gap43	-0.184543	-0.927535	0.3591	0.719592
P17665	Cytochrome c oxidase subunit 7C, mitochondrial	Cox7c	0.163398	0.927157	0.359294	0.719592
Q3UE31	Uncharacterized protein KIAA0930 homolog		0.511352	0.92723	0.359256	0.719592
Q9D6M3	Mitochondrial glutamate carrier 1	Slc25a22	-0.0657914	-0.927641	0.359046	0.719592
Q9CQI3;Q9ERL7	Glia maturation factor beta	Gmfb	-0.123124	-0.92595	0.359913	0.72043
P62137	Serine/threonine-protein phosphatase PP1-alpha catalytic subunit	Ppp1ca	-0.0594824	-0.924192	0.360816	0.720551
P70302	Stromal interaction molecule 1	Stim1	-0.126357	-0.923614	0.361114	0.720551
Q6PDM2	Serine/arginine-rich splicing factor 1	Srsf1	-0.0588278	-0.924125	0.360851	0.720551
Q9CQ75	NADH dehydrogenase [ubiquinone] 1 alpha subcomplex subunit 2	Ndufa2	-0.104436	-0.923482	0.361182	0.720551
Q9D187	Mitotic spindle-associated MMXD complex subunit MIP18	Fam96b	-0.148477	-0.925395	0.360198	0.720551
Q9EQP2	EH domain-containing protein 4	Ehd4	0.292757	0.924611	0.360601	0.720551
Q99M71	Mammalian ependymin-related protein 1	Epdr1	0.141212	0.922433	0.361722	0.721228
Q7TNR6	Immunoglobulin superfamily member 21	Igsf21	-0.15798	-0.921751	0.362073	0.721526
P08113	Endoplasmin	Hsp90b1	0.13857	0.920306	0.362819	0.72202
P38647	Stress-70 protein, mitochondrial	Hspa9	-0.0593505	-0.920505	0.362716	0.72202
Q8CEC5	NF-kappa-B inhibitor-interacting Ras-like protein 1	Nkiras1	-0.159125	-0.920097	0.362926	0.72202
Q80VP9	Aspartate beta-hydroxylase domain-containing protein 2	Asphd2	0.146739	0.919084	0.36345	0.722659
P70372	ELAV-like protein 1	Elavl1	-0.0757163	-0.917728	0.364151	0.723652
Q99JF8	PC4 and SFRS1-interacting protein	Psip1	0.097893	0.916919	0.36457	0.724082
Q9CQE1	Protein NipSnap homolog 3B	Nipsnap3b	-0.276931	-0.915625	0.36524	0.724609
Q9ESX5	H/ACA ribonucleoprotein complex subunit 4	Dkc1	-0.22046	-0.91574	0.36518	0.724609
Q8CA71	Protein shisa-4	Shisa4	0.183324	0.91489	0.365622	0.724964
O35604	Niemann-Pick C1 protein	Npc1	0.18358	0.91311	0.366546	0.725189
Q99L47	Hsc70-interacting protein	St13	-0.0863646	-0.913394	0.366398	0.725189
Q9JM14	5(3)-deoxyribonucleotidase, cytosolic type	Nt5c	0.153966	0.913837	0.366168	0.725189
Q9R0M6	Ras-related protein Rab-9A	Rab9a	-0.171394	-0.913413	0.366388	0.725189
Q8BIG7	Catechol O-methyltransferase domain-containing protein 1	Comtd1	0.190382	0.911558	0.367352	0.726384
Q9Z0H4	CUGBP Elav-like family member 2	Celf2	-0.0850891	-0.909198	0.368582	0.728412
P26883	Peptidyl-prolyl cis-trans isomerase FKBP1A	Fkbp1a	-0.0803996	-0.908181	0.369112	0.729058
P32020	Non-specific lipid-transfer protein	Scp2	0.126064	0.906599	0.369939	0.730287
P21619	Lamin-B2	Lmnb2	-0.0795972	-0.905675	0.370422	0.730838
P14869	60S acidic ribosomal protein P0	Rplp0	0.0952953	0.904953	0.3708	0.731006
P22723	Gamma-aminobutyric acid receptor subunit gamma-2	Gabrg2	0.123494	0.904732	0.370916	0.731006
Q60597	2-oxoglutarate dehydrogenase, mitochondrial	Ogdh	-0.0661447	-0.903754	0.371428	0.731612
Q9DB60	Prostamide/prostaglandin F synthase	Fam213b	0.196324	0.903156	0.371741	0.731827
P09528	Ferritin heavy chain;Ferritin heavy chain, N-terminally processed	Fth1	-0.135868	-0.897814	0.374549	0.732446
P62858	40S ribosomal protein S28	Rps28	-0.151176	-0.901656	0.372528	0.732446
Q5F2E8	Serine/threonine-protein kinase TAO1	Taok1	-0.113497	-0.899809	0.373499	0.732446
Q60900	ELAV-like protein 3	Elavl3	0.109353	0.900035	0.37338	0.732446
Q6NSW3	A-kinase anchor protein SPHKAP	Sphkap	0.210696	0.900237	0.373274	0.732446
Q6ZWM4	U6 snRNA-associated Sm-like protein LSm8	Lsm8	0.184402	0.898728	0.374067	0.732446
Q8BP47	Asparagine--tRNA ligase, cytoplasmic	Nars	-0.0775558	-0.897497	0.374716	0.732446
Q8BR90	UPF0600 protein C5orf51 homolog		-0.168654	-0.898549	0.374162	0.732446
Q8BYA0	Tubulin-specific chaperone D	Tbcd	-0.199911	-0.897528	0.3747	0.732446
Q99LC5	Electron transfer flavoprotein subunit alpha, mitochondrial	Etfa	0.0651841	0.897527	0.3747	0.732446
Q9EP89	Serine beta-lactamase-like protein LACTB, mitochondrial	Lactb	-0.323441	-0.901777	0.372465	0.732446
Q9JKD3	Secretory carrier-associated membrane protein 5	Scamp5	-0.151692	-0.900826	0.372964	0.732446
Q9QZX7	Serine racemase	Srr	-0.0814833	-0.900858	0.372947	0.732446
O88507	Ciliary neurotrophic factor receptor subunit alpha	Cntfr	-0.228499	-0.89572	0.375653	0.733658
P51410	60S ribosomal protein L9	Rpl9	0.113883	0.895544	0.375746	0.733658
Q9Z2I2	Peptidyl-prolyl cis-trans isomerase FKBP1B	Fkbp1b	-0.146856	-0.893914	0.376607	0.734938
Q80WJ7	Protein LYRIC	Mtdh	-0.0817724	-0.893394	0.376882	0.735075
P04370	Myelin basic protein	Mbp	-0.127863	-0.891463	0.377905	0.73519
P20357	Microtubule-associated protein 2	Map2	-0.0492336	-0.891342	0.377969	0.73519
P30416	Peptidyl-prolyl cis-trans isomerase FKBP4;Peptidyl-prolyl cis-trans isomerase FKBP4, N-terminally processed	Fkbp4	0.102071	0.892413	0.377401	0.73519
Q99N84	28S ribosomal protein S18b, mitochondrial	Mrps18b	-0.159462	-0.891636	0.377813	0.73519
Q9CQ91	NADH dehydrogenase [ubiquinone] 1 alpha subcomplex subunit 3	Ndufa3	-0.139959	-0.891475	0.377898	0.73519
Q9QYF1	Retinol dehydrogenase 11	Rdh11	0.179716	0.890642	0.37834	0.735512
O55017	Voltage-dependent N-type calcium channel subunit alpha-1B	Cacna1b	-0.127131	-0.888978	0.379223	0.736828
Q8BL66	Early endosome antigen 1	Eea1	-0.116559	-0.888566	0.379441	0.736854
P03911	NADH-ubiquinone oxidoreductase chain 4	Mtnd4	-0.203353	-0.887171	0.380183	0.737894
Q3TEL6	RING finger protein 157	Rnf157	0.140292	0.88554	0.381052	0.738621
Q6P1F6;Q6ZWR4	Serine/threonine-protein phosphatase 2A 55 kDa regulatory subunit B alpha isoform	Ppp2r2a	0.0887062	0.885304	0.381177	0.738621
Q8K2Q0	COMM domain-containing protein 9	Commd9	0.199419	0.885616	0.381011	0.738621
P34884	Macrophage migration inhibitory factor	Mif	0.112722	0.882725	0.382553	0.739176
P62313	U6 snRNA-associated Sm-like protein LSm6	Lsm6	-0.108549	-0.882444	0.382703	0.739176
P97355	Spermine synthase	Sms	-0.114772	-0.883751	0.382005	0.739176
Q3UH66;Q80UE6	Serine/threonine-protein kinase WNK2	Wnk2	-0.0873505	-0.883488	0.382146	0.739176
Q6ZQK5	Arf-GAP with coiled-coil, ANK repeat and PH domain-containing protein 2	Acap2	-0.144352	-0.883402	0.382191	0.739176
Q9D967	Magnesium-dependent phosphatase 1	Mdp1	0.102205	0.883023	0.382393	0.739176
A2ALS5	Rap1 GTPase-activating protein 1	Rap1gap	-0.083324	-0.880749	0.383609	0.739223
P62830	60S ribosomal protein L23	Rpl23	0.100866	0.877769	0.385205	0.739223
Q02053;P31254	Ubiquitin-like modifier-activating enzyme 1	Uba1	-0.0459599	-0.878864	0.384619	0.739223
Q6PDI5	Proteasome-associated protein ECM29 homolog	Ecm29	0.180081	0.878003	0.38508	0.739223
Q6PHU5	Sortilin	Sort1	0.118892	0.878731	0.38469	0.739223
Q8C166	Copine-1	Cpne1	-0.120113	-0.881995	0.382943	0.739223
Q8CIV8	Tubulin-specific chaperone E	Tbce	-0.141656	-0.879281	0.384395	0.739223
Q9CQK7	RWD domain-containing protein 1	Rwdd1	-0.142578	-0.879605	0.384221	0.739223
Q9CY50	Translocon-associated protein subunit alpha	Ssr1	0.166025	0.878014	0.385074	0.739223
Q9JHG6	Calcipressin-1	Rcan1	0.169251	0.881379	0.383272	0.739223
Q9JM13	Rab5 GDP/GTP exchange factor	Rabgef1	0.164637	0.877904	0.385133	0.739223
Q9QYJ0	DnaJ homolog subfamily A member 2	Dnaja2	0.079757	0.879367	0.384349	0.739223
P84096	Rho-related GTP-binding protein RhoG	Rhog	0.0894051	0.875483	0.386433	0.739595
Q06138	Calcium-binding protein 39	Cab39	-0.0997306	-0.876271	0.386009	0.739595
Q61423	Potassium voltage-gated channel subfamily A member 4	Kcna4	0.0884035	0.875866	0.386227	0.739595
Q7TQH0	Ataxin-2-like protein	Atxn2l	-0.0996047	-0.875582	0.38638	0.739595
Q9CX56	26S proteasome non-ATPase regulatory subunit 8	Psmd8	0.0970097	0.875588	0.386376	0.739595
Q9CPW4	Actin-related protein 2/3 complex subunit 5	Arpc5	-0.107055	-0.87366	0.387413	0.741075
A2AG50	MAP7 domain-containing protein 2	Map7d2	-0.234656	-0.859856	0.394889	0.7412
O08585	Clathrin light chain A	Clta	-0.222261	-0.863027	0.393164	0.7412
O70152	Dolichol-phosphate mannosyltransferase subunit 1	Dpm1	-0.199296	-0.858621	0.395563	0.7412
O89026	Roundabout homolog 1	Robo1	-0.0980034	-0.867799	0.390576	0.7412
P14148	60S ribosomal protein L7	Rpl7	0.0866452	0.858922	0.395398	0.7412
P14576	Signal recognition particle 54 kDa protein	Srp54	-0.201324	-0.869764	0.389514	0.7412
P37804	Transgelin	Tagln	-0.336545	-0.859895	0.394868	0.7412
P42125	Enoyl-CoA delta isomerase 1, mitochondrial	Eci1	-0.100921	-0.86432	0.392462	0.7412
P53026	60S ribosomal protein L10a	Rpl10a	-0.145746	-0.871266	0.388703	0.7412
P53395	Lipoamide acyltransferase component of branched-chain alpha-keto acid dehydrogenase complex, mitochondrial	Dbt	0.113172	0.859244	0.395223	0.7412
P54728	UV excision repair protein RAD23 homolog B	Rad23b	-0.183114	-0.862746	0.393317	0.7412
P60710	Actin, cytoplasmic 1;Actin, cytoplasmic 1, N-terminally processed	Actb	-0.111037	-0.871169	0.388756	0.7412
P62270	40S ribosomal protein S18	Rps18	0.116779	0.869212	0.389813	0.7412
P70168	Importin subunit beta-1	Kpnb1	-0.0657582	-0.862821	0.393276	0.7412
Q60875	Rho guanine nucleotide exchange factor 2	Arhgef2	-0.0766008	-0.870474	0.389131	0.7412
Q6GYP7	Ral GTPase-activating protein subunit alpha-1	Ralgapa1	-0.139219	-0.872375	0.388106	0.7412
Q8BJ42	Disks large-associated protein 2	Dlgap2	-0.103162	-0.863173	0.393085	0.7412
Q8BKH7	Target of rapamycin complex 2 subunit MAPKAP1	Mapkap1	0.15353	0.865481	0.391832	0.7412
Q8BTE0	Succinate dehydrogenase assembly factor 4, mitochondrial	Sdhaf4	0.150511	0.859333	0.395174	0.7412
Q8BTG3	T-complex protein 11-like protein 1	Tcp11l1	0.149712	0.858644	0.39555	0.7412
Q8C0E2	Vacuolar protein sorting-associated protein 26B	Vps26b	0.0757435	0.869114	0.389866	0.7412
Q8C4Q6	Axin interactor, dorsalization-associated protein	Aida	0.176489	0.861698	0.393887	0.7412
Q8CBW3	Abl interactor 1	Abi1	-0.072186	-0.859296	0.395194	0.7412
Q8CGP5;Q8R1M2;Q8CGP7;Q8BFU2;Q8CGP6;C0HKE9;C0HKE8;C0HKE7;C0HKE6;C0HKE5;C0HKE4;C0HKE3;C0HKE2;C0HKE1	Histone H2A type 1-F;Histone H2A.J;Histone H2A type 1-K;Histone H2A type 3;Histone H2A type 1-H	Hist1h2af;H2afj;Hist1h2ak;Hist3h2a;Hist1h2ah	0.723159	0.870413	0.389164	0.7412
Q8JZN5	Acyl-CoA dehydrogenase family member 9, mitochondrial	Acad9	0.100836	0.865496	0.391824	0.7412
Q8JZY2	COMM domain-containing protein 10	Commd10	0.105787	0.862265	0.393578	0.7412
Q8QZY1	Eukaryotic translation initiation factor 3 subunit L	Eif3l	0.102201	0.87039	0.389176	0.7412
Q8R1H0	Homeodomain-only protein	Hopx	0.315942	0.86311	0.393119	0.7412
Q8R4E6	Purine-rich element-binding protein gamma	Purg	0.167936	0.864853	0.392173	0.7412
Q91VC7	Protein phosphatase 1 regulatory subunit 14A	Ppp1r14a	-0.305095	-0.867469	0.390755	0.7412
Q99M87	DnaJ homolog subfamily A member 3, mitochondrial	Dnaja3	-0.122189	-0.866524	0.391267	0.7412
Q9CQ19	Myosin regulatory light polypeptide 9	Myl9	-0.252141	-0.858255	0.395762	0.7412
Q9CQM9	Glutaredoxin-3	Glrx3	0.0776292	0.868761	0.390056	0.7412
Q9CY27	Very-long-chain enoyl-CoA reductase	Tecr	0.263493	0.872147	0.388228	0.7412
Q9CY58	Plasminogen activator inhibitor 1 RNA-binding protein	Serbp1	-0.0912146	-0.862493	0.393454	0.7412
Q9D1G5	Leucine-rich repeat-containing protein 57	Lrrc57	0.134786	0.859105	0.395298	0.7412
Q9DCD0	6-phosphogluconate dehydrogenase, decarboxylating	Pgd	0.0799295	0.872928	0.387808	0.7412
Q9JIG8	PRA1 family protein 2	Praf2	0.162469	0.861516	0.393985	0.7412
Q9QZ08	N-acetyl-D-glucosamine kinase	Nagk	0.166283	0.86515	0.392011	0.7412
Q9QZH3	Peptidyl-prolyl cis-trans isomerase E	Ppie	0.125118	0.862381	0.393515	0.7412
Q3TLI0	Trafficking protein particle complex subunit 10	Trappc10	-0.199814	-0.856608	0.396662	0.742108
Q8C008	Double zinc ribbon and ankyrin repeat-containing protein 1	Dzank1	-0.121314	-0.856979	0.396459	0.742108
P21550	Beta-enolase	Eno3	-0.169827	-0.855571	0.397228	0.742779
O88307	Sortilin-related receptor	Sorl1	0.123923	0.854752	0.397676	0.742841
P55088	Aquaporin-4	Aqp4	0.266703	0.854812	0.397644	0.742841
Q3UUI3	Acyl-coenzyme A thioesterase THEM4	Them4	-0.120297	-0.851839	0.399273	0.745046
Q66JS6;Q3UGC7	Eukaryotic translation initiation factor 3 subunit J-B;Eukaryotic translation initiation factor 3 subunit J-A	Eif3j2;Eif3j1	0.0926518	0.852183	0.399084	0.745046
P17156	Heat shock-related 70 kDa protein 2	Hspa2	-0.0456757	-0.84818	0.401283	0.745526
P57722	Poly(rC)-binding protein 3	Pcbp3	0.168092	0.84882	0.400931	0.745526
P62141	Serine/threonine-protein phosphatase PP1-beta catalytic subunit	Ppp1cb	-0.0842193	-0.849432	0.400594	0.745526
P62309	Small nuclear ribonucleoprotein G	Snrpg	0.182632	0.848266	0.401236	0.745526
P97450	ATP synthase-coupling factor 6, mitochondrial	Atp5j	-0.0970731	-0.84758	0.401613	0.745526
Q60737	Casein kinase II subunit alpha	Csnk2a1	-0.0642081	-0.849511	0.400551	0.745526
Q61387	Cytochrome c oxidase subunit 7A-related protein, mitochondrial	Cox7a2l	0.622048	0.849946	0.400312	0.745526
Q6PA06	Atlastin-2	Atl2	0.129077	0.848071	0.401343	0.745526
Q80W04	Transmembrane and coiled-coil domains protein 2	Tmcc2	-0.128105	-0.847802	0.401491	0.745526
Q9D1K7	UPF0687 protein C20orf27 homolog		-0.163007	-0.84832	0.401206	0.745526
A2AHG0	Leucine zipper putative tumor suppressor 3	Lzts3	-0.129957	-0.843315	0.403966	0.746409
O88986	2-amino-3-ketobutyrate coenzyme A ligase, mitochondrial	Gcat	0.205818	0.845136	0.402961	0.746409
Q76MZ3;Q7TNP2	Serine/threonine-protein phosphatase 2A 65 kDa regulatory subunit A alpha isoform	Ppp2r1a	-0.0704968	-0.843896	0.403645	0.746409
Q9D154;Q8VHP7;Q9JK88	Leukocyte elastase inhibitor A	Serpinb1a	-0.204476	-0.845394	0.402818	0.746409
Q9D8W5	26S proteasome non-ATPase regulatory subunit 12	Psmd12	0.0762979	0.84363	0.403792	0.746409
Q9QZE5	Coatomer subunit gamma-1	Copg1	0.17147	0.846285	0.402327	0.746409
Q9R0D8	WD repeat-containing protein 54	Wdr54	0.132937	0.843631	0.403792	0.746409
Q9WVQ1;P46938	Membrane-associated guanylate kinase, WW and PDZ domain-containing protein 2	Magi2	-0.134562	-0.844602	0.403255	0.746409
Q9Z1P6	NADH dehydrogenase [ubiquinone] 1 alpha subcomplex subunit 7	Ndufa7	-0.122492	-0.844961	0.403057	0.746409
P50136	2-oxoisovalerate dehydrogenase subunit alpha, mitochondrial	Bckdha	-0.14232	-0.841488	0.404976	0.746528
Q3TCH7	Cullin-4A	Cul4a	0.180667	0.841173	0.405151	0.746528
Q3UYH7	Beta-adrenergic receptor kinase 2	Adrbk2	-0.135633	-0.841086	0.405199	0.746528
Q62093	Serine/arginine-rich splicing factor 2	Srsf2	-0.0643518	-0.841763	0.404824	0.746528
Q8BHL8	Proteasome inhibitor PI31 subunit	Psmf1	-0.136234	-0.840937	0.405282	0.746528
Q8R1N4	NudC domain-containing protein 3	Nudcd3	0.227057	0.842574	0.404376	0.746528
Q9D1M4	Eukaryotic translation elongation factor 1 epsilon-1	Eef1e1	-0.260756	-0.840323	0.405622	0.746769
P12815	Programmed cell death protein 6	Pdcd6	-0.100286	-0.838385	0.406696	0.747594
Q8R5H1	Ubiquitin carboxyl-terminal hydrolase 15	Usp15	-0.200745	-0.838939	0.406389	0.747594
Q9Z2D3	Non-syndromic hearing impairment protein 5 homolog	Dfna5	0.218681	0.838663	0.406542	0.747594
O35387	HCLS1-associated protein X-1	Hax1	-0.130722	-0.837959	0.406933	0.747645
Q60864	Stress-induced-phosphoprotein 1	Stip1	0.0507293	0.837532	0.40717	0.747697
Q8VHQ9	Acyl-coenzyme A thioesterase 11	Acot11	0.209885	0.836122	0.407953	0.748752
Q8BYK4	Retinol dehydrogenase 12	Rdh12	-0.242403	-0.8333	0.409524	0.750864
Q9JMD0	BUB3-interacting and GLEBS motif-containing protein ZNF207	Znf207	-0.137994	-0.833357	0.409492	0.750864
P09671	Superoxide dismutase [Mn], mitochondrial	Sod2	-0.0963544	-0.832258	0.410105	0.751544
Q8C7K6	Prenylcysteine oxidase-like	Pcyox1l	0.122132	0.830585	0.411039	0.75287
Q7TNG5	Echinoderm microtubule-associated protein-like 2	Eml2	0.166207	0.828808	0.412032	0.753872
Q9CQ48	NudC domain-containing protein 2	Nudcd2	0.116064	0.828477	0.412218	0.753872
Q9DCJ5	NADH dehydrogenase [ubiquinone] 1 alpha subcomplex subunit 8	Ndufa8	0.0870814	0.828989	0.411931	0.753872
Q9CWQ0	Diphthine synthase	Dph5	-0.203886	-0.827776	0.41261	0.754204
Q3UTJ2	Sorbin and SH3 domain-containing protein 2	Sorbs2	-0.112526	-0.824361	0.414525	0.757017
Q8BFY6	Peflin	Pef1	0.196867	0.823524	0.414995	0.757017
Q8BYM5	Neuroligin-3	Nlgn3	-0.0794147	-0.823693	0.4149	0.757017
Q8K0E8;CON__P02676	Fibrinogen beta chain;Fibrinopeptide B;Fibrinogen beta chain	Fgb	0.501812	0.824056	0.414696	0.757017
P04919	Band 3 anion transport protein	Slc4a1	0.224718	0.822785	0.41541	0.757388
Q8VHI6	Wiskott-Aldrich syndrome protein family member 3	Wasf3	0.0944189	0.822329	0.415666	0.757469
Q6PIP5	NudC domain-containing protein 1	Nudcd1	-0.127517	-0.821728	0.416005	0.757701
P20352	Tissue factor	F3	0.102239	0.820559	0.416663	0.75828
Q6WVG3	BTB/POZ domain-containing protein KCTD12	Kctd12	-0.0614957	-0.820034	0.416958	0.75828
Q9DCB8	Iron-sulfur cluster assembly 2 homolog, mitochondrial	Isca2	0.0999919	0.820183	0.416875	0.75828
O88343	Electrogenic sodium bicarbonate cotransporter 1	Slc4a4	-0.0867965	-0.819446	0.41729	0.758357
Q3UPL0	Protein transport protein Sec31A	Sec31a	0.0751767	0.817914	0.418154	0.758357
Q6PAR5	GTPase-activating protein and VPS9 domain-containing protein 1	Gapvd1	-0.094599	-0.81733	0.418484	0.758357
Q6ZPJ0	Testis-expressed sequence 2 protein	Tex2	-0.179924	-0.818195	0.417996	0.758357
Q8K1A6	Coiled-coil and C2 domain-containing protein 1A	Cc2d1a	-0.136895	-0.817887	0.418169	0.758357
Q9ERG2	Striatin-3	Strn3	-0.122577	-0.817453	0.418414	0.758357
Q9Z0V1	Potassium voltage-gated channel subfamily D member 3	Kcnd3	0.131144	0.818301	0.417936	0.758357
P23591	GDP-L-fucose synthase	Tsta3	-0.155458	-0.812505	0.421214	0.758957
P51859	Hepatoma-derived growth factor	Hdgf	-0.118347	-0.81369	0.420543	0.758957
P56391	Cytochrome c oxidase subunit 6B1	Cox6b1	-0.0710019	-0.813847	0.420454	0.758957
Q3UDE2	Tubulin--tyrosine ligase-like protein 12	Ttll12	-0.147233	-0.81374	0.420514	0.758957
Q3V1L4	Cytosolic purine 5-nucleotidase	Nt5c2	0.171347	0.815003	0.4198	0.758957
Q6PDL0	Cytoplasmic dynein 1 light intermediate chain 2	Dync1li2	0.0954094	0.8157	0.419405	0.758957
Q8BIF0	CD99 antigen-like protein 2	Cd99l2	-0.208847	-0.814014	0.420359	0.758957
Q8CAK1	Putative transferase CAF17 homolog, mitochondrial	Iba57	0.141682	0.814173	0.42027	0.758957
Q8K2C9	Very-long-chain (3R)-3-hydroxyacyl-CoA dehydratase 3	Hacd3	0.0761026	0.813523	0.420637	0.758957
Q9EP69	Phosphatidylinositide phosphatase SAC1	Sacm1l	0.141242	0.812248	0.42136	0.758957
Q9ET77	Junctophilin-3	Jph3	-0.125129	-0.813138	0.420856	0.758957
Q9Z2I9	Succinyl-CoA ligase [ADP-forming] subunit beta, mitochondrial	Sucla2	-0.0497441	-0.81272	0.421093	0.758957
P84099	60S ribosomal protein L19	Rpl19	0.0921412	0.811692	0.421676	0.759144
O35326	Serine/arginine-rich splicing factor 5	Srsf5	0.163774	0.808841	0.423295	0.759558
P23927	Alpha-crystallin B chain	Cryab	-0.159874	-0.809859	0.422717	0.759558
Q5HZI2	C2 calcium-dependent domain-containing protein 4C	C2cd4cC2CD4 family	-0.133973	-0.807805	0.423885	0.759558
Q64511;Q01320	DNA topoisomerase 2-beta	Top2b	-0.1156	-0.8072	0.424229	0.759558
Q6ZPF3	T-lymphoma invasion and metastasis-inducing protein 2	Tiam2	-0.160481	-0.807346	0.424146	0.759558
Q8CCT4	Transcription elongation factor A protein-like 5	Tceal5	-0.138425	-0.810646	0.422269	0.759558
Q8VCF0	Mitochondrial antiviral-signaling protein	Mavs	0.10886	0.807179	0.424241	0.759558
Q91VR8	Protein BRICK1	Brk1	0.127932	0.808633	0.423413	0.759558
Q91VZ6	Stromal membrane-associated protein 1	Smap1	-0.100319	-0.807554	0.424027	0.759558
Q9CX00	IST1 homolog	Ist1	-0.147066	-0.80995	0.422665	0.759558
[truncated: 1,581 more rows]

## Sheet: Supplementary DataS2C_female
R
Protein.IDs	Protein.names	Gene.names	logFC	t	P.Value	adj.P.Val
P56695	Wolframin	Wfs1	-0.587856	-5.10643	8.03679e-06	0.0287637
O70456	14-3-3 protein sigma	Sfn	-3.69345	-4.24553	0.000122531	0.171314
Q9JK42	[Pyruvate dehydrogenase (acetyl-transferring)] kinase isozyme 2, mitochondrial	Pdk2	0.580751	4.19406	0.000143599	0.171314
P56873	Sjoegren syndrome/scleroderma autoantigen 1 homolog	Sssca1	0.587248	4.03826	0.000231262	0.206922
Q9CQ40	39S ribosomal protein L49, mitochondrial	Mrpl49	0.639559	3.77179	0.000514923	0.31385
P42227	Signal transducer and activator of transcription 3	Stat3	-0.631988	-3.73879	0.000567774	0.31385
P49446	Receptor-type tyrosine-protein phosphatase epsilon	Ptpre	-1.39366	-3.71236	0.000613844	0.31385
Q8CE50	Sorting nexin-30	Snx30	-0.523404	-3.63696	0.000765965	0.342673
Q9Z127;Q8BGK6	Large neutral amino acids transporter small subunit 1	Slc7a5	-0.445172	-3.59464	0.000866632	0.344631
Q9QY76	Vesicle-associated membrane protein-associated protein B	Vapb	0.287044	3.45606	0.00129299	0.459039
Q8BMK4	Cytoskeleton-associated protein 4	Ckap4	0.411957	3.42554	0.00141085	0.459039
Q9D4H1	Exocyst complex component 2	Exoc2	0.417959	3.3642	0.00167943	0.50089
Q3UMB5	Smith-Magenis syndrome chromosomal region candidate gene 8 protein homolog	Smcr8	0.387572	3.28455	0.00210154	0.522224
Q9D2P8	Myelin-associated oligodendrocyte basic protein	Mobp	-1.54118	-3.26883	0.00219596	0.522224
Q4ACU6	SH3 and multiple ankyrin repeat domains protein 3	Shank3	0.21574	3.25955	0.00225363	0.522224
Q91YJ2	Sorting nexin-4	Snx4	0.284789	3.24688	0.00233461	0.522224
O70251	Elongation factor 1-beta	Eef1b	0.310343	3.17772	0.0028278	0.556604
Q8BHZ0	Protein FAM49A	Fam49a	0.223696	3.16599	0.00292068	0.556604
Q8CIP4	MAP/microtubule affinity-regulating kinase 4	Mark4	0.378133	3.16176	0.00295487	0.556604
Q9ES56	Trafficking protein particle complex subunit 4	Trappc4	0.473167	3.11512	0.00335787	0.558088
P43274	Histone H1.4	Hist1h1e	-0.346117	-3.10374	0.00346386	0.558088
Q3UVK0	Endoplasmic reticulum metallopeptidase 1	Ermp1	-0.491004	-3.10193	0.00348091	0.558088
O35841	Apoptosis inhibitor 5	Api5	-0.371822	-3.08676	0.00362775	0.558088
Q9CXW2	28S ribosomal protein S22, mitochondrial	Mrps22	0.476472	3.07531	0.00374242	0.558088
Q9CR98	Protein FAM136A	Fam136a	0.306803	3.04134	0.00410289	0.583099
P01872	Ig mu chain C region	Ighm	2.19606	2.99376	0.00466306	0.583099
P04370	Myelin basic protein	Mbp	-0.391233	-2.98803	0.00473526	0.583099
Q8C437	PEX5-related protein	Pex5l	-0.373625	-2.97706	0.00487625	0.583099
Q9D1D4	Transmembrane emp24 domain-containing protein 10	Tmed10	0.415176	2.95679	0.00514715	0.583099
Q9D2M8	Ubiquitin-conjugating enzyme E2 variant 2	Ube2v2	-0.216025	-2.94786	0.00527094	0.583099
P55258	Ras-related protein Rab-8A	Rab8a	0.413222	2.94015	0.00537993	0.583099
O88531	Palmitoyl-protein thioesterase 1	Ppt1	0.288125	2.92741	0.00556497	0.583099
Q80W21	Glutathione S-transferase Mu 7	Gstm7	-0.350353	-2.92083	0.0056628	0.583099
P01837	Ig kappa chain C region		1.34896	2.87605	0.00637234	0.583099
Q6NZM9	Histone deacetylase 4	Hdac4	0.539353	2.87281	0.00642689	0.583099
Q9JLJ2	4-trimethylaminobutyraldehyde dehydrogenase	Aldh9a1	0.207005	2.83724	0.00705367	0.583099
O08585	Clathrin light chain A	Clta	-0.664453	-2.82628	0.00725794	0.583099
Q99J77		Nans	-0.591924	-2.826	0.00726321	0.583099
Q91YT0	NADH dehydrogenase [ubiquinone] flavoprotein 1, mitochondrial	Ndufv1	0.157941	2.82562	0.00727039	0.583099
O35678	Monoglyceride lipase	Mgll	0.314569	2.81629	0.00744907	0.583099
Q8VH51	RNA-binding protein 39	Rbm39	-0.354719	-2.81269	0.00751904	0.583099
Q3V0C5	Ubiquitin carboxyl-terminal hydrolase 48	Usp48	-2.76385	-2.80365	0.00769738	0.583099
Q9JKF7	39S ribosomal protein L39, mitochondrial	Mrpl39	0.440292	2.80101	0.00775038	0.583099
P00920	Carbonic anhydrase 2	Ca2	-0.268284	-2.79571	0.00785745	0.583099
P84096	Rho-related GTP-binding protein RhoG	Rhog	-0.259227	-2.78071	0.00816807	0.583099
Q9WUA2	Phenylalanine--tRNA ligase beta subunit	Farsb	0.202258	2.77166	0.00836094	0.583099
Q9QYR6	Microtubule-associated protein 1A;MAP1A heavy chain;MAP1 light chain LC2	Map1a	-0.141098	-2.75541	0.00871798	0.583099
Q01065	Calcium/calmodulin-dependent 3,5-cyclic nucleotide phosphodiesterase 1B	Pde1b	0.309652	2.745	0.00895403	0.583099
P32883	GTPase KRas;GTPase KRas, N-terminally processed	Kras	-0.503294	-2.7422	0.00901854	0.583099
P28474;Q64437	Alcohol dehydrogenase class-3	Adh5	-0.254475	-2.73979	0.00907434	0.583099
P26645	Myristoylated alanine-rich C-kinase substrate	Marcks	-0.360321	-2.73369	0.00921725	0.583099
Q91YE6	Importin-9	Ipo9	0.325535	2.72103	0.00952017	0.583099
Q9CR57	60S ribosomal protein L14	Rpl14	-0.46457	-2.71559	0.00965334	0.583099
Q8K4B0	Metastasis-associated protein MTA1	Mta1	-0.41925	-2.71161	0.00975183	0.583099
Q91VR8	Protein BRICK1	Brk1	0.390136	2.70134	0.0100101	0.583099
Q8BWR2	PITH domain-containing protein 1	Pithd1	-0.295936	-2.69441	0.0101879	0.583099
P63328	Serine/threonine-protein phosphatase 2B catalytic subunit alpha isoform	Ppp3ca	-0.176381	-2.68584	0.0104116	0.583099
P20352	Tissue factor	F3	0.305007	2.68159	0.0105245	0.583099
O88958	Glucosamine-6-phosphate isomerase 1	Gnpda1	0.444998	2.67827	0.0106132	0.583099
P59481	VIP36-like protein	Lman2l	0.439772	2.67794	0.0106223	0.583099
Q8K0U4	Heat shock 70 kDa protein 12A	Hspa12a	0.201262	2.67357	0.0107404	0.583099
P40240	CD9 antigen	Cd9	-0.34487	-2.66294	0.0110326	0.583099
Q91VM5	RNA binding motif protein, X-linked-like-1	Rbmxl1	0.486775	2.65582	0.0112325	0.583099
Q9CPP6	NADH dehydrogenase [ubiquinone] 1 alpha subcomplex subunit 5	Ndufa5	0.236532	2.65159	0.0113528	0.583099
Q9JLB0	MAGUK p55 subfamily member 6	Mpp6	0.187557	2.63344	0.0118825	0.583099
Q80XK6	Autophagy-related protein 2 homolog B	Atg2b	-0.494726	-2.62542	0.0121239	0.583099
Q9DC28;Q9JMK2	Casein kinase I isoform delta;Casein kinase I isoform epsilon	Csnk1d;Csnk1e	0.351433	2.60846	0.0126491	0.583099
P57759	Endoplasmic reticulum resident protein 29	Erp29	0.1723	2.60723	0.0126878	0.583099
P51830	Adenylate cyclase type 9	Adcy9	0.205219	2.60514	0.0127544	0.583099
Q61885	Myelin-oligodendrocyte glycoprotein	Mog	-0.31881	-2.59662	0.0130278	0.583099
P62823	Ras-related protein Rab-3C	Rab3c	-0.176909	-2.59493	0.0130827	0.583099
Q91YP0	L-2-hydroxyglutarate dehydrogenase, mitochondrial	L2hgdh	0.344947	2.58518	0.013404	0.583099
Q0VGU4		Vgf	-0.384414	-2.58465	0.0134215	0.583099
Q8VCT3	Aminopeptidase B	Rnpep	-0.375286	-2.58212	0.0135061	0.583099
Q9JHS9	Spliceosome-associated protein CWC15 homolog	Cwc15	0.362012	2.57737	0.0136662	0.583099
O88441	Metaxin-2	Mtx2	0.258079	2.56354	0.0141422	0.583099
Q62178	Semaphorin-4A	Sema4a	0.297999	2.5606	0.0142453	0.583099
Q6R891	Neurabin-2	Ppp1r9b	-0.194729	-2.54571	0.0147787	0.583099
Q56A07	Sodium channel subunit beta-2	Scn2b	0.364754	2.54107	0.0149482	0.583099
Q4VA53;Q6A026	Sister chromatid cohesion protein PDS5 homolog B	Pds5b	-0.833255	-2.53186	0.0152908	0.583099
P70297;O88811	Signal transducing adapter molecule 1	Stam	-0.146038	-2.52833	0.0154237	0.583099
Q922H2	[Pyruvate dehydrogenase (acetyl-transferring)] kinase isozyme 3, mitochondrial	Pdk3	0.302719	2.52684	0.0154804	0.583099
Q922D8	C-1-tetrahydrofolate synthase, cytoplasmic;Methylenetetrahydrofolate dehydrogenase;Methenyltetrahydrofolate cyclohydrolase;Formyltetrahydrofolate synthetase;C-1-tetrahydrofolate synthase, cytoplasmic, N-terminally processed	Mthfd1	0.196897	2.52154	0.0156828	0.583099
Q3TXS7	26S proteasome non-ATPase regulatory subunit 1	Psmd1	0.201897	2.51104	0.016091	0.583099
Q9DBR7	Protein phosphatase 1 regulatory subunit 12A	Ppp1r12a	0.406407	2.5097	0.0161437	0.583099
Q99KF1	Transmembrane emp24 domain-containing protein 9	Tmed9	0.49639	2.50674	0.0162609	0.583099
Q5HZI2	C2 calcium-dependent domain-containing protein 4C	C2cd4cC2CD4 family	0.379205	2.50469	0.0163428	0.583099
Q5EBJ4	Ermin	Ermn	-0.316158	-2.50366	0.0163837	0.583099
P27048;P63163	Small nuclear ribonucleoprotein-associated protein B;Small nuclear ribonucleoprotein-associated protein N	Snrpb;Snrpn	0.256017	2.50359	0.0163865	0.583099
Q8BHL3	TBC1 domain family member 10B	Tbc1d10b	0.49161	2.50196	0.016452	0.583099
Q8CHW4	Translation initiation factor eIF-2B subunit epsilon	Eif2b5	-0.363609	-2.50195	0.0164523	0.583099
Q8CCN5	Breast carcinoma-amplified sequence 3 homolog	Bcas3	0.195094	2.49263	0.0168305	0.583099
Q9QZQ1	Afadin	Mllt4	0.366986	2.4925	0.0168359	0.583099
Q9WV54	Acid ceramidase;Acid ceramidase subunit alpha;Acid ceramidase subunit beta	Asah1	0.288153	2.48877	0.0169895	0.583099
P62307	Small nuclear ribonucleoprotein F	Snrpf	0.415539	2.48601	0.0171039	0.583099
P48542	G protein-activated inward rectifier potassium channel 2	Kcnj6	-0.456854	-2.48138	0.0172973	0.583099
Q924L1	LETM1 domain-containing protein 1	Letmd1	0.271685	2.47814	0.0174339	0.583099
Q9CRB6	Tubulin polymerization-promoting protein family member 3	Tppp3	0.344501	2.47641	0.0175072	0.583099
Q91XV3	Brain acid soluble protein 1	Basp1	-0.312758	-2.47225	0.0176849	0.583099
P06330;P01757;P01756	Ig heavy chain V region AC38 205.12;Ig heavy chain V region J558;Ig heavy chain V region MOPC 104E		1.75212	2.4703	0.0177686	0.583099
Q6P5E4	UDP-glucose:glycoprotein glucosyltransferase 1	Uggt1	0.237944	2.46665	0.0179265	0.583099
P29595	NEDD8	Nedd8	0.42058	2.46055	0.018193	0.583099
Q8K183	Pyridoxal kinase	Pdxk	0.478599	2.45738	0.0183327	0.583099
Q8VDM4	26S proteasome non-ATPase regulatory subunit 2	Psmd2	0.128607	2.45067	0.0186324	0.583099
Q9JIF0	Protein arginine N-methyltransferase 1	Prmt1	0.211039	2.44974	0.0186741	0.583099
Q8R050	Eukaryotic peptide chain release factor GTP-binding subunit ERF3A	Gspt1	-0.20212	-2.44353	0.018956	0.583099
Q08274	Dystrophia myotonica WD repeat-containing protein	Dmwd	0.277506	2.43439	0.0193775	0.583099
Q9Z0E6	Interferon-induced guanylate-binding protein 2	Gbp2	-2.18931	-2.43329	0.0194289	0.583099
O88507	Ciliary neurotrophic factor receptor subunit alpha	Cntfr	-0.565943	-2.43026	0.0195707	0.583099
P80315	T-complex protein 1 subunit delta	Cct4	0.189064	2.42728	0.0197113	0.583099
Q9WUL7	ADP-ribosylation factor-like protein 3	Arl3	0.320852	2.42561	0.0197902	0.583099
P68404	Protein kinase C beta type	Prkcb	-0.167371	-2.42476	0.0198307	0.583099
Q8VDQ8	NAD-dependent protein deacetylase sirtuin-2	Sirt2	-0.238194	-2.41619	0.0202422	0.583099
P43006	Excitatory amino acid transporter 2	Slc1a2	-0.148265	-2.41608	0.0202473	0.583099
P62849	40S ribosomal protein S24	Rps24	0.3207	2.41317	0.0203891	0.583099
Q8C8T7	Protein ELFN1	Elfn1	-0.357604	-2.40892	0.0205971	0.583099
Q04899;Q04735	Cyclin-dependent kinase 18	Cdk18	0.199948	2.40701	0.0206917	0.583099
Q3UFS0	Protein zyg-11 homolog B	Zyg11b	0.44211	2.40695	0.0206946	0.583099
A2A8L5	Receptor-type tyrosine-protein phosphatase F	Ptprf	-0.528774	-2.39863	0.0211095	0.583099
Q6ZQ18	Protein EFR3 homolog B	Efr3b	0.259725	2.39656	0.021214	0.583099
P97351	40S ribosomal protein S3a	Rps3a	0.24035	2.39535	0.021275	0.583099
P23953;Q8VCT4;Q8VCC2;Q64176;Q91WU0	Carboxylesterase 1C	Ces1c	-0.53188	-2.3926	0.0214151	0.583099
Q920P5	Adenylate kinase isoenzyme 5	Ak5	0.186415	2.39218	0.0214367	0.583099
Q99MN9	Propionyl-CoA carboxylase beta chain, mitochondrial	Pccb	0.200152	2.38947	0.0215754	0.583099
P62077	Mitochondrial import inner membrane translocase subunit Tim8 B	Timm8b	0.358723	2.38797	0.0216525	0.583099
Q8R081	Heterogeneous nuclear ribonucleoprotein L	Hnrnpl	-0.136318	-2.3826	0.0219305	0.583099
Q9Z2D0	Myotubularin-related protein 9	Mtmr9	0.385038	2.37721	0.0222129	0.583099
Q9DC33	High mobility group protein 20A	Hmg20a	0.583203	2.37628	0.022262	0.583099
Q7TNM2	Tripartite motif-containing protein 46	Trim46	-0.2926	-2.37344	0.0224121	0.583099
Q45VK7	Cytoplasmic dynein 2 heavy chain 1	Dync2h1	-0.499333	-2.36968	0.022613	0.583099
Q91YD9	Neural Wiskott-Aldrich syndrome protein	Wasl	-0.181782	-2.36178	0.0230397	0.583099
P42859	Huntingtin	Htt	-0.262509	-2.36122	0.0230703	0.583099
Q921M4	Golgin subfamily A member 2	Golga2	0.378532	2.35722	0.0232892	0.583099
Q64362	AKT-interacting protein	Aktip	-0.320442	-2.35721	0.0232897	0.583099
P61750	ADP-ribosylation factor 4	Arf4	-0.330501	-2.35647	0.0233305	0.583099
P01867	Ig gamma-2B chain C region	Igh-3	1.06573	2.35256	0.0235469	0.583099
P38647	Stress-70 protein, mitochondrial	Hspa9	0.138109	2.34646	0.0238878	0.583099
Q8BP92	Reticulocalbin-2	Rcn2	-0.255292	-2.34382	0.0240367	0.583099
P70699	Lysosomal alpha-glucosidase	Gaa	0.288875	2.34292	0.0240875	0.583099
Q3UYH7	Beta-adrenergic receptor kinase 2	Adrbk2	0.344346	2.33918	0.0243008	0.583099
Q3THW5;P0C0S6	Histone H2A.V;Histone H2A.Z	H2afv;H2afz	-0.306849	-2.33677	0.0244386	0.583099
Q3UTH8;Q5DU57	Rho guanine nucleotide exchange factor 9	Arhgef9	0.335978	2.33567	0.024502	0.583099
P21614	Vitamin D-binding protein	Gc	-0.582305	-2.33511	0.0245343	0.583099
Q6PHZ2	Calcium/calmodulin-dependent protein kinase type II subunit delta	Camk2d	0.22459	2.33466	0.0245598	0.583099
Q9JI91	Alpha-actinin-2	Actn2	0.233007	2.33459	0.0245644	0.583099
Q80Y14	Glutaredoxin-related protein 5, mitochondrial	Glrx5	0.257245	2.33346	0.0246291	0.583099
P43277	Histone H1.3	Hist1h1d	-0.262278	-2.32799	0.0249475	0.583099
Q9CPU2	NADH dehydrogenase [ubiquinone] 1 beta subcomplex subunit 2, mitochondrial	Ndufb2	0.267301	2.32263	0.0252629	0.583099
Q3V038	Tetratricopeptide repeat protein 9A	Ttc9	-0.311366	-2.3118	0.0259113	0.583099
B1AWN6;A2ASI5;A2APX8;Q62205;Q9JJV9;Q6QIY3	Sodium channel protein	Scn2a1	0.19856	2.31139	0.0259361	0.583099
Q8R3P0	Aspartoacylase	Aspa	-0.30737	-2.3083	0.0261234	0.583099
O89053	Coronin-1A	Coro1a	-0.254869	-2.3064	0.02624	0.583099
P99029	Peroxiredoxin-5, mitochondrial	Prdx5	0.144138	2.30171	0.0265281	0.583099
Q8BLQ9	Cell adhesion molecule 2	Cadm2	-0.157388	-2.30163	0.0265335	0.583099
P50171	Estradiol 17-beta-dehydrogenase 8	Hsd17b8	0.402254	2.29974	0.0266505	0.583099
Q9CYT6	Adenylyl cyclase-associated protein 2	Cap2	-0.123867	-2.29484	0.0269559	0.583099
O08915	AH receptor-interacting protein	Aip	0.276623	2.292	0.0271349	0.583099
Q8CG76	Aflatoxin B1 aldehyde reductase member 2	Akr7a2	0.288442	2.28923	0.0273097	0.583099
Q91W90	Thioredoxin domain-containing protein 5	Txndc5	0.222829	2.2887	0.0273433	0.583099
Q00915	Retinol-binding protein 1	Rbp1	0.608358	2.2882	0.0273753	0.583099
Q8BP48	Methionine aminopeptidase 1	Metap1	0.297202	2.28741	0.0274253	0.583099
Q8BHC1	Ras-related protein Rab-39B	Rab39b	0.372923	2.27877	0.0279808	0.583099
P24549;O35945	Retinal dehydrogenase 1	Aldh1a1	-0.527375	-2.27828	0.0280125	0.583099
Q9CQE1	Protein NipSnap homolog 3B	Nipsnap3b	0.628714	2.27714	0.0280864	0.583099
Q8VHY0	Chondroitin sulfate proteoglycan 4	Cspg4	-0.185985	-2.27359	0.0283184	0.583099
Q9CQX2	Cytochrome b5 type B	Cyb5b	0.936819	2.27302	0.0283557	0.583099
O70250	Phosphoglycerate mutase 2	Pgam2	0.450581	2.27216	0.0284126	0.583099
Q9DCS3	Trans-2-enoyl-CoA reductase, mitochondrial	Mecr	0.309774	2.26916	0.02861	0.583099
Q9JIY5	Serine protease HTRA2, mitochondrial	Htra2	-0.361034	-2.26793	0.0286914	0.583099
Q9QZ08	N-acetyl-D-glucosamine kinase	Nagk	0.397908	2.26786	0.0286964	0.583099
Q8R0Y8	Mitochondrial coenzyme A transporter SLC25A42	Slc25a42	0.698111	2.26671	0.0287724	0.583099
P10922	Histone H1.0;Histone H1.0, N-terminally processed	H1f0	-0.776769	-2.26141	0.0291267	0.583099
Q9Z239	Phospholemman	Fxyd1	-0.370009	-2.26073	0.0291724	0.583099
Q7TNV0	Protein DEK	Dek	-0.299588	-2.2595	0.0292557	0.583099
Q9D7V9	N-acylethanolamine-hydrolyzing acid amidase;N-acylethanolamine-hydrolyzing acid amidase subunit alpha;N-acylethanolamine-hydrolyzing acid amidase subunit beta	Naaa	-0.445289	-2.25824	0.0293407	0.583099
Q8R2Y8	Peptidyl-tRNA hydrolase 2, mitochondrial	Ptrh2	0.382038	2.25767	0.0293795	0.583099
Q920I9	WD repeat-containing protein 7	Wdr7	0.134665	2.25305	0.0296939	0.583099
Q6PEB6	MOB-like protein phocein	Mob4	-0.294516	-2.25082	0.0298461	0.583099
P55096	ATP-binding cassette sub-family D member 3	Abcd3	0.324816	2.24722	0.0300945	0.583099
Q68FH0	Plakophilin-4	Pkp4	-0.181664	-2.24188	0.030466	0.583099
Q80XN0	D-beta-hydroxybutyrate dehydrogenase, mitochondrial	Bdh1	0.232728	2.23741	0.0307799	0.583099
Q3UQ84	Threonine--tRNA ligase, mitochondrial	Tars2	0.423322	2.23528	0.0309308	0.583099
Q01853	Transitional endoplasmic reticulum ATPase	Vcp	0.104928	2.23291	0.0310996	0.583099
Q6IRU5	Clathrin light chain B	Cltb	-0.210322	-2.22958	0.0313372	0.583099
P60879	Synaptosomal-associated protein 25	Snap25	-0.16894	-2.22546	0.0316342	0.583099
P80560	Receptor-type tyrosine-protein phosphatase N2	Ptprn2	0.284246	2.22382	0.0317527	0.583099
O88741	Ganglioside-induced differentiation-associated protein 1	Gdap1	0.180661	2.21646	0.032291	0.583099
Q922B1	O-acetyl-ADP-ribose deacetylase MACROD1	Macrod1	0.419383	2.21537	0.0323717	0.583099
Q8K4Z0	Leucine-rich repeat LGI family member 2	Lgi2	0.339945	2.21386	0.0324832	0.583099
Q6PEE3	Ribonucleoside-diphosphate reductase subunit M2 B	Rrm2b	-0.482159	-2.2136	0.0325025	0.583099
Q9D8B7	Junctional adhesion molecule C	Jam3	-0.266848	-2.21335	0.0325213	0.583099
Q9D7E4	UPF0449 protein C19orf25 homolog		-0.314247	-2.2114	0.0326655	0.583099
Q9D8W5	26S proteasome non-ATPase regulatory subunit 12	Psmd12	0.182567	2.21133	0.0326714	0.583099
Q8BLF1	Neutral cholesterol ester hydrolase 1	Nceh1	0.213424	2.20797	0.032922	0.583099
Q99JP6	Homer protein homolog 3	Homer3	-0.573358	-2.2042	0.0332056	0.583099
Q3V3V9	Leucine-rich repeat-containing protein 16C	Rltpr	-0.18072	-2.20244	0.0333387	0.583099
O08739	AMP deaminase 3	Ampd3	-0.451659	-2.20027	0.0335039	0.583099
Q3UUI3	Acyl-coenzyme A thioesterase THEM4	Them4	0.28324	2.1971	0.0337461	0.583099
Q91YM2	Rho GTPase-activating protein 35	Arhgap35	-0.304866	-2.19603	0.033828	0.583099
P70175	Disks large homolog 3	Dlg3	-0.129832	-2.19294	0.0340656	0.583099
Q9R257	Heme-binding protein 1	Hebp1	-0.371238	-2.1923	0.034115	0.583099
Q5XJV6	Serine/threonine-protein kinase LMTK3	Lmtk3	0.30706	2.18636	0.0345778	0.583099
Q80U63;Q811U4	Mitofusin-2	Mfn2	0.207702	2.18271	0.0348643	0.583099
P53994	Ras-related protein Rab-2A	Rab2a	0.145244	2.1806	0.0350306	0.583099
P62309	Small nuclear ribonucleoprotein G	Snrpg	0.428389	2.17964	0.0351072	0.583099
O09044	Synaptosomal-associated protein 23	Snap23	-0.453157	-2.17543	0.0354427	0.583099
Q62084	Protein phosphatase 1 regulatory subunit 14B	Ppp1r14b	-0.165571	-2.175	0.0354768	0.583099
Q9JHW4	Selenocysteine-specific elongation factor	Eefsec	-0.417612	-2.17307	0.0356316	0.583099
Q9Z1T2	Thrombospondin-4	Thbs4	-0.500179	-2.17212	0.035708	0.583099
Q8BZW8	NHL repeat-containing protein 2	Nhlrc2	-0.297834	-2.17155	0.0357538	0.583099
Q9JIS5	Synaptic vesicle glycoprotein 2A	Sv2a	-0.181541	-2.16843	0.0360061	0.583099
Q9ERS2	NADH dehydrogenase [ubiquinone] 1 alpha subcomplex subunit 13	Ndufa13	0.286019	2.166	0.0362043	0.583099
Q07417	Short-chain specific acyl-CoA dehydrogenase, mitochondrial	Acads	-0.260212	-2.16275	0.0364698	0.583099
Q99N84	28S ribosomal protein S18b, mitochondrial	Mrps18b	-0.352444	-2.1588	0.0367955	0.583099
Q8BGX0	E3 ubiquitin-protein ligase TRIM23	Trim23	0.315531	2.15651	0.036985	0.583099
Q9CQW2	ADP-ribosylation factor-like protein 8B	Arl8b	0.22688	2.15586	0.037039	0.583099
Q80YN3	Breast carcinoma-amplified sequence 1 homolog	Bcas1	-0.275401	-2.155	0.0371108	0.583099
Q7TME0	Lipid phosphate phosphatase-related protein type 4	Lppr4	-0.148167	-2.15102	0.037444	0.583099
Q99KJ8	Dynactin subunit 2	Dctn2	0.119901	2.14935	0.0375843	0.583099
O54983	Ketimine reductase mu-crystallin	Crym	0.19474	2.14927	0.0375911	0.583099
Q8BYA0	Tubulin-specific chaperone D	Tbcd	-0.436987	-2.14917	0.0375995	0.583099
Q9DBG6	Dolichyl-diphosphooligosaccharide--protein glycosyltransferase subunit 2	Rpn2	0.195057	2.14595	0.0378716	0.583099
Q80Y86	Mitogen-activated protein kinase 15	Mapk15	0.270661	2.14549	0.0379109	0.583099
Q9D964	Glycine amidinotransferase, mitochondrial	Gatm	-0.637593	-2.1442	0.0380205	0.583099
P62192	26S protease regulatory subunit 4	Psmc1	0.176248	2.13802	0.0385498	0.583099
Q9D882	Uncharacterized protein C10orf35 homolog		-0.231325	-2.13584	0.0387375	0.583099
Q9DBF1	Alpha-aminoadipic semialdehyde dehydrogenase	Aldh7a1	0.408292	2.13302	0.0389827	0.583099
Q9Z1S5	Neuronal-specific septin-3	2023-09-03	-0.142351	-2.13291	0.0389923	0.583099
Q9D5V5	Cullin-5	Cul5	0.186897	2.13228	0.0390472	0.583099
Q61789	Laminin subunit alpha-3	Lama3	0.45672	2.12518	0.0396704	0.583099
Q64332	Synapsin-2	Syn2	0.110231	2.12504	0.0396825	0.583099
P61957;Q9Z172	Small ubiquitin-related modifier 2;Small ubiquitin-related modifier 3	Sumo2;Sumo3	0.360716	2.12417	0.0397598	0.583099
Q9EPQ7	StAR-related lipid transfer protein 5	Stard5	0.355429	2.12368	0.0398032	0.583099
Q80W54	CAAX prenyl protease 1 homolog	Zmpste24	0.29412	2.12137	0.0400084	0.583099
Q6P1B1	Xaa-Pro aminopeptidase 1	Xpnpep1	0.137972	2.12044	0.0400912	0.583099
P24472	Glutathione S-transferase A4	Gsta4	-0.172582	-2.1198	0.0401485	0.583099
Q9CPV4	Glyoxalase domain-containing protein 4	Glod4	-0.174998	-2.11917	0.0402047	0.583099
P63318	Protein kinase C gamma type	Prkcg	-0.116702	-2.11843	0.0402707	0.583099
Q8C0D5	Elongation factor Tu GTP-binding domain-containing protein 1	Eftud1	-0.319006	-2.11787	0.0403212	0.583099
P80316	T-complex protein 1 subunit epsilon	Cct5	0.111056	2.11746	0.0403575	0.583099
Q60766	Immunity-related GTPase family M protein 1	Irgm1	-1.41366	-2.11678	0.0404186	0.583099
Q9CVB6	Actin-related protein 2/3 complex subunit 2	Arpc2	-0.127168	-2.11654	0.0404401	0.583099
Q9CQA3	Succinate dehydrogenase [ubiquinone] iron-sulfur subunit, mitochondrial	Sdhb	0.14598	2.11515	0.0405657	0.583099
P62852	40S ribosomal protein S25	Rps25	0.247537	2.11476	0.0406002	0.583099
Q8R1S0	Ubiquinone biosynthesis monooxygenase COQ6, mitochondrial	Coq6	0.344237	2.11195	0.0408546	0.583099
Q3UYC0	Protein phosphatase 1H	Ppm1h	0.195596	2.10937	0.0410894	0.583099
Q6W8Q3	Purkinje cell protein 4-like protein 1	Pcp4l1	-0.883502	-2.10889	0.0411329	0.583099
Q62093	Serine/arginine-rich splicing factor 2	Srsf2	-0.147116	-2.10804	0.0412106	0.583099
Q569Z6	Thyroid hormone receptor-associated protein 3	Thrap3	0.381323	2.10737	0.0412724	0.583099
P55302	Alpha-2-macroglobulin receptor-associated protein	Lrpap1	0.248467	2.10558	0.0414363	0.583099
Q8BYM5	Neuroligin-3	Nlgn3	-0.185192	-2.10415	0.0415674	0.583099
Q8BKX1	Brain-specific angiogenesis inhibitor 1-associated protein 2	Baiap2	0.124312	2.10292	0.0416809	0.583099
P16675	Lysosomal protective protein;Lysosomal protective protein 32 kDa chain;Lysosomal protective protein 20 kDa chain	Ctsa	0.33515	2.10109	0.0418503	0.583099
Q6DFV3	Rho GTPase-activating protein 21	Arhgap21	-0.327265	-2.10076	0.041881	0.583099
Q99JY0	Trifunctional enzyme subunit beta, mitochondrial;3-ketoacyl-CoA thiolase	Hadhb	0.129501	2.09992	0.0419586	0.583099
Q3THS6	S-adenosylmethionine synthase isoform type-2	Mat2a	0.171709	2.09701	0.0422297	0.583099
Q9DCJ9	N-acetylneuraminate lyase	Npl	0.833674	2.09688	0.0422414	0.583099
Q8BPN8	DmX-like protein 2	Dmxl2	0.0893176	2.09532	0.0423876	0.583099
Q5SW19	Clustered mitochondria protein homolog	Cluh	-0.328106	-2.09134	0.0427621	0.583099
Q6P8X1	Sorting nexin-6;Sorting nexin-6, N-terminally processed	Snx6	-0.230935	-2.09077	0.0428158	0.583099
Q80TB8	Synaptic vesicle membrane protein VAT-1 homolog-like	Vat1l	0.409533	2.0898	0.0429072	0.583099
Q6P1F6;Q6ZWR4	Serine/threonine-protein phosphatase 2A 55 kDa regulatory subunit B alpha isoform	Ppp2r2a	-0.19114	-2.08968	0.0429187	0.583099
Q3TY86	Apoptosis-inducing factor 3	Aifm3	-0.367603	-2.08933	0.0429521	0.583099
Q8VC42	Uncharacterized protein C18orf8 homolog	Mic1	-0.269166	-2.0887	0.0430115	0.583099
Q5DQR4	Syntaxin-binding protein 5-like	Stxbp5l	-0.204184	-2.08664	0.0432074	0.583545
Q6NSW3	A-kinase anchor protein SPHKAP	Sphkap	-0.443814	-2.07726	0.0441089	0.589073
Q99LY9	NADH dehydrogenase [ubiquinone] iron-sulfur protein 5;NADH dehydrogenase [ubiquinone] iron-sulfur protein 5, N-terminally processed	Ndufs5	0.117336	2.07713	0.044122	0.589073
P60202	Myelin proteolipid protein	Plp1	-0.280208	-2.07644	0.0441891	0.589073
P62141	Serine/threonine-protein phosphatase PP1-beta catalytic subunit	Ppp1cb	-0.187787	-2.07479	0.0443494	0.589073
O35409	Glutamate carboxypeptidase 2	Folh1	0.31695	2.07086	0.0447336	0.589073
Q9WV69	Dematin	Dmtn	-0.215738	-2.07023	0.0447957	0.589073
Q64345	Interferon-induced protein with tetratricopeptide repeats 3	Ifit3	-1.10245	-2.06943	0.0448742	0.589073
O54692	Centromere/kinetochore protein zw10 homolog	Zw10	0.348981	2.06783	0.0450324	0.589073
Q9QZH3	Peptidyl-prolyl cis-trans isomerase E	Ppie	-0.273781	-2.06716	0.0450981	0.589073
Q8R0A7	Uncharacterized protein KIAA0513	Kiaa0513	0.187991	2.06399	0.0454133	0.591033
Q64514	Tripeptidyl-peptidase 2	Tpp2	0.154632	2.06062	0.0457493	0.591088
Q7TMM9	Tubulin beta-2A chain	Tubb2a	-0.263479	-2.05632	0.046182	0.591088
Q9QXS6	Drebrin	Dbn1	-0.101526	-2.05631	0.0461823	0.591088
O70228	Probable phospholipid-transporting ATPase IIA	Atp9a	0.310301	2.05492	0.0463227	0.591088
Q80WG5	Volume-regulated anion channel subunit LRRC8A	Lrrc8a	0.357817	2.05382	0.046435	0.591088
Q8CDG3	Deubiquitinating protein VCIP135	Vcpip1	-0.298229	-2.05367	0.04645	0.591088
Q9CXI0	2-methoxy-6-polyprenyl-1,4-benzoquinol methylase, mitochondrial	Coq5	-0.222633	-2.04949	0.0468754	0.591088
Q9JKP5	Muscleblind-like protein 1	Mbnl1	-0.317773	-2.04721	0.0471098	0.591088
Q64521	Glycerol-3-phosphate dehydrogenase, mitochondrial	Gpd2	0.137154	2.04615	0.047218	0.591088
Q8BK64;Q8N9S3	Activator of 90 kDa heat shock protein ATPase homolog 1	Ahsa1	0.165558	2.04487	0.0473505	0.591088
P0C7L0	WAS/WASL-interacting protein family member 3	Wipf3	-0.210797	-2.0422	0.0476263	0.591088
P27546	Microtubule-associated protein 4	Map4	-0.141236	-2.04106	0.0477454	0.591088
O35954	Membrane-associated phosphatidylinositol transfer protein 1	Pitpnm1	0.163101	2.04092	0.04776	0.591088
Q9R1P1	Proteasome subunit beta type-3	Psmb3	0.309185	2.04018	0.047837	0.591088
Q8CIM7	Cytochrome P450 2D26	Cyp2d26	0.270306	2.03949	0.0479085	0.591088
Q9Z2V5	Histone deacetylase 6	Hdac6	-0.29667	-2.03804	0.04806	0.591088
P18524;P18526;P01806;P01809;P01810;P01808;P01807	Ig heavy chain V region RF;Ig heavy chain V region 345		-0.453975	-2.02947	0.0489629	0.599326
Q9DCS9	NADH dehydrogenase [ubiquinone] 1 beta subcomplex subunit 10	Ndufb10	0.171769	2.0277	0.0491516	0.599326
Q6PIE5;Q9Z1W8	Sodium/potassium-transporting ATPase subunit alpha-2	Atp1a2	-0.12243	-2.02561	0.0493749	0.599326
P29351	Tyrosine-protein phosphatase non-receptor type 6	Ptpn6	-0.523987	-2.02538	0.0493996	0.599326
Q9JHS3	Ragulator complex protein LAMTOR2	Lamtor2	-0.32022	-2.009	0.0511805	0.613623
Q9CQE5	Regulator of G-protein signaling 10	Rgs10	0.329995	2.00815	0.0512744	0.613623
Q61686	Chromobox protein homolog 5	Cbx5	-0.26273	-2.00604	0.0515087	0.613623
Q64442	Sorbitol dehydrogenase	Sord	0.21633	2.00467	0.0516601	0.613623
P14148	60S ribosomal protein L7	Rpl7	-0.184524	-2.00379	0.0517582	0.613623
P26883	Peptidyl-prolyl cis-trans isomerase FKBP1A	Fkbp1a	-0.161808	-2.00221	0.0519351	0.613623
P42225	Signal transducer and activator of transcription 1	Stat1	-1.64728	-1.99926	0.0522661	0.613623
P26369	Splicing factor U2AF 65 kDa subunit	U2af2	0.20224	1.99866	0.0523338	0.613623
P56382	ATP synthase subunit epsilon, mitochondrial	Atp5e	0.470395	1.99839	0.0523633	0.613623
P35282	Ras-related protein Rab-21	Rab21	0.23111	1.9977	0.0524415	0.613623
O70161;P70181	Phosphatidylinositol 4-phosphate 5-kinase type-1 gamma	Pip5k1c	0.159078	1.9975	0.052464	0.613623
Q01405	Protein transport protein Sec23A	Sec23a	0.228892	1.99275	0.0530019	0.613873
P63101	14-3-3 protein zeta/delta	Ywhaz	-0.158654	-1.99133	0.0531642	0.613873
Q6NS60	F-box only protein 41	Fbxo41	0.28254	1.99059	0.0532485	0.613873
P56546	C-terminal-binding protein 2	Ctbp2	0.294489	1.99058	0.0532495	0.613873
Q9D6J6	NADH dehydrogenase [ubiquinone] flavoprotein 2, mitochondrial	Ndufv2	0.114388	1.98977	0.053343	0.613873
Q6NXK7	Inactive dipeptidyl peptidase 10	Dpp10	0.238774	1.98524	0.0538635	0.617876
O35326	Serine/arginine-rich splicing factor 5	Srsf5	-0.366156	-1.98096	0.0543586	0.621564
P47199	Quinone oxidoreductase	Cryz	0.222397	1.97672	0.0548548	0.622245
P14106	Complement C1q subcomponent subunit B	C1qb	-0.615728	-1.97403	0.0551705	0.622245
Q9ER72	Cysteine--tRNA ligase, cytoplasmic	Cars	0.238985	1.97402	0.0551714	0.622245
Q8BVI5	Syntaxin-16	Stx16	0.312766	1.97377	0.0552016	0.622245
Q9JMA1	Ubiquitin carboxyl-terminal hydrolase 14	Usp14	-0.165596	-1.97304	0.0552875	0.622245
Q9D7X8	Gamma-glutamylcyclotransferase	Ggct	-0.350405	-1.9689	0.0557773	0.624183
Q9CQ10	Charged multivesicular body protein 3	Chmp3	0.269557	1.96219	0.0565815	0.624183
Q8K273	Membrane magnesium transporter 1	Mmgt1	0.157064	1.96156	0.0566573	0.624183
Q9R0P3	S-formylglutathione hydrolase	Esd	-0.158636	-1.96077	0.0567517	0.624183
D3YXK2	Scaffold attachment factor B1	Safb	-0.162298	-1.96072	0.0567584	0.624183
Q8C1B1	Calmodulin-regulated spectrin-associated protein 2	Camsap2	-0.424238	-1.95926	0.0569352	0.624183
Q8BFV3	Dual specificity protein phosphatase 4	Dusp4	6.73689	1.95802	0.0570852	0.624183
P62748	Hippocalcin-like protein 1	Hpcal1	0.272196	1.95737	0.0571647	0.624183
Q61730	Interleukin-1 receptor accessory protein	Il1rap	-0.492862	-1.95615	0.0573122	0.624183
Q921L3	Transmembrane and coiled-coil domain-containing protein 1	Tmco1	0.335382	1.95278	0.0577238	0.624183
Q9CZM2	60S ribosomal protein L15	Rpl15	-0.248472	-1.9494	0.0581394	0.624183
Q924D0	Reticulon-4-interacting protein 1, mitochondrial	Rtn4ip1	0.273456	1.94922	0.0581615	0.624183
Q8BG51	Mitochondrial Rho GTPase 1	Rhot1	0.166877	1.94704	0.0584318	0.624183
Q4KMM3	Oxidation resistance protein 1	Oxr1	-0.117238	-1.9453	0.0586475	0.624183
Q9WVK4	EH domain-containing protein 1	Ehd1	0.15436	1.94318	0.0589114	0.624183
Q00558	Factor VIII intron 22 protein	F8a1	0.367132	1.94265	0.0589767	0.624183
Q9Z2L6	Multiple inositol polyphosphate phosphatase 1	Minpp1	0.395422	1.94078	0.0592105	0.624183
P62996	Transformer-2 protein homolog beta	Tra2b	-0.28281	-1.93763	0.0596066	0.624183
Q61696	Heat shock 70 kDa protein 1A	Hspa1a	0.143244	1.93749	0.0596237	0.624183
Q9Z0S1	3(2),5-bisphosphate nucleotidase 1	Bpnt1	-0.215764	-1.93709	0.0596742	0.624183
Q8BNI4	Derlin-2	Derl2	-0.320034	-1.93631	0.0597735	0.624183
P09602	Non-histone chromosomal protein HMG-17	Hmgn2	-0.558496	-1.93579	0.0598382	0.624183
Q9ES00	Ubiquitin conjugation factor E4 B	Ube4b	0.265194	1.93508	0.0599286	0.624183
Q8BZA9	Fructose-2,6-bisphosphatase TIGAR	Tigar	0.357008	1.93234	0.0602766	0.624183
P17439	Glucosylceramidase	Gba	-0.315283	-1.9309	0.0604598	0.624183
P18760	Cofilin-1	Cfl1	-0.125597	-1.93073	0.0604805	0.624183
Q8R5C5	Beta-centractin	Actr1b	0.123178	1.93059	0.0604991	0.624183
P36536	GTP-binding protein SAR1a	Sar1a	0.269098	1.92998	0.0605767	0.624183
Q9ER35	Fructosamine-3-kinase	Fn3k	-0.416562	-1.92913	0.0606852	0.624183
Q8CGU1	Calcium-binding and coiled-coil domain-containing protein 1	Calcoco1	-0.240547	-1.92857	0.060757	0.624183
A2RT62	F-box/LRR-repeat protein 16	Fbxl16	-0.142009	-1.92713	0.0609421	0.624183
Q6PA06	Atlastin-2	Atl2	0.267647	1.92636	0.0610405	0.624183
Q9CR16	Peptidyl-prolyl cis-trans isomerase D	Ppid	0.0988682	1.92222	0.0615748	0.625349
Q80ZW2	Protein THEM6	Them6	0.491976	1.92193	0.0616121	0.625349
Q91V64	Isochorismatase domain-containing protein 1	Isoc1	-0.398818	-1.92125	0.0617005	0.625349
Q6ZPQ6	Membrane-associated phosphatidylinositol transfer protein 2	Pitpnm2	-0.210906	-1.91903	0.0619898	0.625349
P70207	Plexin-A2	Plxna2	-0.604638	-1.91784	0.0621444	0.625349
Q8C6E0	Cilia- and flagella-associated protein 36	Cfap36	0.379931	1.91399	0.0626494	0.625349
P62259	14-3-3 protein epsilon	Ywhae	-0.157629	-1.91327	0.0627437	0.625349
Q9CQS4	Solute carrier family 25 member 46	Slc25a46	0.238383	1.91307	0.0627695	0.625349
Q9DB20	ATP synthase subunit O, mitochondrial	Atp5o	0.137588	1.91276	0.0628104	0.625349
Q91W67	Ubiquitin-like protein 7	Ubl7	-0.41256	-1.91207	0.0629019	0.625349
Q6WQJ1	Sn1-specific diacylglycerol lipase alpha	Dagla	-0.256277	-1.90756	0.0634987	0.629535
Q9JMF3	Guanine nucleotide-binding protein G(I)/G(S)/G(O) subunit gamma-13	Gng13	0.441572	1.90442	0.0639175	0.630591
Q8C0M9	Isoaspartyl peptidase/L-asparaginase;Isoaspartyl peptidase/L-asparaginase alpha chain;Isoaspartyl peptidase/L-asparaginase beta chain	Asrgl1	0.151011	1.90412	0.0639577	0.630591
Q9CXI5	Mesencephalic astrocyte-derived neurotrophic factor	Manf	0.32657	1.90034	0.0644654	0.631879
Q8CBE3	WD repeat-containing protein 37	Wdr37	0.151673	1.89979	0.0645395	0.631879
Q9WV92	Band 4.1-like protein 3;Band 4.1-like protein 3, N-terminally processed	Epb41l3	-0.108399	-1.89921	0.064618	0.631879
P61148	Fibroblast growth factor 1	Fgf1	0.344625	1.89403	0.0653206	0.633069
P80317	T-complex protein 1 subunit zeta	Cct6a	0.103353	1.89402	0.0653213	0.633069
P97478	5-demethoxyubiquinone hydroxylase, mitochondrial	Coq7	0.293227	1.89267	0.0655056	0.633069
Q9Z2Q6	Septin-5	2023-09-05	0.127448	1.89232	0.0655535	0.633069
Q9D2R0	Acetoacetyl-CoA synthetase	Aacs	0.321528	1.8918	0.0656253	0.633069
P84104	Serine/arginine-rich splicing factor 3	Srsf3	0.210965	1.89038	0.0658189	0.633069
Q8VCF0	Mitochondrial antiviral-signaling protein	Mavs	-0.23259	-1.88923	0.0659778	0.633069
P63323	40S ribosomal protein S12	Rps12	0.211586	1.88492	0.0665722	0.634887
Q9D1G1	Ras-related protein Rab-1B	Rab1b	0.0973508	1.88218	0.0669526	0.634887
Q8C050	Ribosomal protein S6 kinase alpha-5	Rps6ka5	0.366849	1.88164	0.0670276	0.634887
Q6ZPR5	Sphingomyelin phosphodiesterase 4	Smpd4	0.377305	1.87551	0.0678855	0.634887
P35505	Fumarylacetoacetase	Fah	-0.225286	-1.87426	0.0680622	0.634887
Q03517	Secretogranin-2;Secretoneurin;Manserin	Scg2	0.219472	1.87253	0.0683071	0.634887
A2ASS6	Titin	Ttn	-0.33092	-1.8716	0.0684388	0.634887
Q9JJC6	RILP-like protein 1	Rilpl1	-0.263284	-1.87071	0.0685653	0.634887
P02802	Metallothionein-1	Mt1	-1.76713	-1.86984	0.0686881	0.634887
Q80X50	Ubiquitin-associated protein 2-like	Ubap2l	0.125633	1.86751	0.0690201	0.634887
Q923D2	Flavin reductase (NADPH)	Blvrb	-0.229092	-1.86693	0.0691031	0.634887
O35215	D-dopachrome decarboxylase	Ddt	0.279911	1.86674	0.0691307	0.634887
P59325	Eukaryotic translation initiation factor 5	Eif5	0.189628	1.86466	0.069429	0.634887
Q8VBT0	Thioredoxin-related transmembrane protein 1	Tmx1	0.260015	1.86361	0.0695799	0.634887
Q8CEC5	NF-kappa-B inhibitor-interacting Ras-like protein 1	Nkiras1	0.294177	1.86336	0.0696161	0.634887
O70378	ER membrane protein complex subunit 8	Emc8	-0.251071	-1.86294	0.0696765	0.634887
Q64520	Guanylate kinase	Guk1	-0.20115	-1.85976	0.070135	0.634887
Q6P3D0	U8 snoRNA-decapping enzyme	Nudt16	0.340609	1.85781	0.0704174	0.634887
P83887;Q8VCK3	Tubulin gamma-1 chain;Tubulin gamma-2 chain	Tubg1;Tubg2	-0.295397	-1.85757	0.0704523	0.634887
P68254	14-3-3 protein theta	Ywhaq	-0.108635	-1.85612	0.0706641	0.634887
Q64373	Bcl-2-like protein 1	Bcl2l1	0.209624	1.85594	0.0706904	0.634887
Q80TJ1	Calcium-dependent secretion activator 1	Cadps	0.111244	1.85565	0.0707323	0.634887
Q61411	GTPase HRas;GTPase HRas, N-terminally processed	Hras	0.147306	1.85433	0.0709245	0.634887
Q9CRB0	Sorting nexin-24	Snx24	-0.42071	-1.85284	0.0711424	0.634887
Q8VHL1	Histone-lysine N-methyltransferase SETD7	Setd7	0.167622	1.85268	0.071166	0.634887
Q9D0B5	Thiosulfate sulfurtransferase/rhodanese-like domain-containing protein 3	Tstd3	-0.340671	-1.85093	0.0714227	0.634887
P97411	Islet cell autoantigen 1	Ica1	-0.215918	-1.84815	0.0718333	0.634887
P56379	6.8 kDa mitochondrial proteolipid	Mp68	-0.225031	-1.84795	0.071863	0.634887
P70414	Sodium/calcium exchanger 1	Slc8a1	0.197243	1.84758	0.0719175	0.634887
Q8BHA3	Probable D-tyrosyl-tRNA(Tyr) deacylase 2	Dtd2	-0.239517	-1.84646	0.0720832	0.634887
P11881	Inositol 1,4,5-trisphosphate receptor type 1	Itpr1	-0.175283	-1.84606	0.0721426	0.634887
Q3UJB9	Enhancer of mRNA-decapping protein 4	Edc4	0.252124	1.84558	0.0722138	0.634887
Q8BMJ2	Leucine--tRNA ligase, cytoplasmic	Lars	-0.146361	-1.8445	0.0723741	0.634887
Q9QUH0	Glutaredoxin-1	Glrx	0.185758	1.8443	0.0724032	0.634887
Q9R0I7	YLP motif-containing protein 1	Ylpm1	-0.196721	-1.84258	0.0726594	0.634887
O54724	Polymerase I and transcript release factor	Ptrf	-0.300783	-1.84197	0.0727515	0.634887
P12658	Calbindin	Calb1	-0.166941	-1.83912	0.0731783	0.634887
Q8VDK1	Nitrilase homolog 1	Nit1	-0.264667	-1.83897	0.0732009	0.634887
Q8CHI8	E1A-binding protein p400	Ep400	-0.287439	-1.837	0.0734972	0.634887
P63216	Guanine nucleotide-binding protein G(I)/G(S)/G(O) subunit gamma-3	Gng3	-0.205639	-1.83639	0.0735881	0.634887
Q9D2V7	Coronin-7	Coro7	-0.171139	-1.83527	0.0737573	0.634887
P28667	MARCKS-related protein	Marcksl1	-0.277567	-1.83369	0.0739969	0.634887
P16330	2,3-cyclic-nucleotide 3-phosphodiesterase	Cnp	-0.193936	-1.83365	0.0740024	0.634887
Q9Z2I8	Succinyl-CoA ligase [GDP-forming] subunit beta, mitochondrial	Suclg2	-0.259714	-1.83282	0.0741293	0.634887
Q6ZQ29	Serine/threonine-protein kinase TAO2	Taok2	-0.22936	-1.83268	0.07415	0.634887
Q80UJ7	Rab3 GTPase-activating protein catalytic subunit	Rab3gap1	0.203648	1.83074	0.0744448	0.634955
P43406	Integrin alpha-V;Integrin alpha-V heavy chain;Integrin alpha-V light chain	Itgav	0.160328	1.82567	0.0752201	0.634955
Q6PGB6	N-alpha-acetyltransferase 50	Naa50	0.304534	1.82495	0.0753309	0.634955
Q9CQ92	Mitochondrial fission 1 protein	Fis1	-0.230126	-1.82424	0.0754397	0.634955
Q8R317	Ubiquilin-1	Ubqln1	-0.286398	-1.82312	0.0756135	0.634955
Q60759	Glutaryl-CoA dehydrogenase, mitochondrial	Gcdh	0.230962	1.82202	0.0757835	0.634955
Q3U0V1	Far upstream element-binding protein 2	Khsrp	-0.105012	-1.8216	0.0758485	0.634955
Q62446	Peptidyl-prolyl cis-trans isomerase FKBP3	Fkbp3	0.317025	1.82153	0.0758585	0.634955
P83917	Chromobox protein homolog 1	Cbx1	-0.359001	-1.81938	0.0761924	0.634955
P80313	T-complex protein 1 subunit eta	Cct7	0.122195	1.8192	0.07622	0.634955
Q925E7	Serine/threonine-protein phosphatase 2A 55 kDa regulatory subunit B delta isoform	Ppp2r2d	0.533707	1.81894	0.0762603	0.634955
Q9WV85	Nucleoside diphosphate kinase 3	Nme3	0.34544	1.81877	0.0762869	0.634955
Q8CHP8	Phosphoglycolate phosphatase	Pgp	0.148536	1.81759	0.0764711	0.635012
Q8CGK7	Guanine nucleotide-binding protein G(olf) subunit alpha	Gnal	0.257321	1.81425	0.0769926	0.637863
Q61418	H(+)/Cl(-) exchange transporter 4	Clcn4	0.404484	1.81187	0.0773653	0.63947
P21981	Protein-glutamine gamma-glutamyltransferase 2	Tgm2	-0.563394	-1.80465	0.0785098	0.644949
Q9JKC6	Cell cycle exit and neuronal differentiation protein 1	Cend1	-0.747717	-1.80463	0.0785123	0.644949
Q3URD3	Sarcolemmal membrane-associated protein	Slmap	0.218433	1.80427	0.0785689	0.644949
P07724;CON__P02768-1	Serum albumin	Alb	-0.324107	-1.80308	0.0787599	0.645038
P15105	Glutamine synthetase	Glul	-0.21342	-1.80156	0.0790025	0.645548
Q9QYS2	Metabotropic glutamate receptor 3	Grm3	-0.163597	-1.79662	0.0797965	0.64801
Q9ESJ4	NCK-interacting protein with SH3 domain	Nckipsd	0.22957	1.79658	0.0798028	0.64801
Q02105	Complement C1q subcomponent subunit C	C1qc	-0.575829	-1.79628	0.0798521	0.64801
Q3UNZ8	Quinone oxidoreductase-like protein 2		0.389624	1.79519	0.080028	0.64801
Q6PGL7	WASH complex subunit FAM21	Fam21	-0.256047	-1.79165	0.0806037	0.651198
Q9D6J5	NADH dehydrogenase [ubiquinone] 1 beta subcomplex subunit 8, mitochondrial	Ndufb8	0.110513	1.79013	0.0808503	0.651719
P62301	40S ribosomal protein S13	Rps13	0.216321	1.78652	0.0814416	0.653654
P63037	DnaJ homolog subfamily A member 1	Dnaja1	-0.100694	-1.78566	0.0815844	0.653654
S4R1M9	Oxysterol-binding protein	Osbpl10	0.331564	1.78468	0.0817443	0.653654
Q8QZY1	Eukaryotic translation initiation factor 3 subunit L	Eif3l	0.191175	1.78354	0.0819338	0.653654
Q148V7	LisH domain and HEAT repeat-containing protein KIAA1468	Kiaa1468	0.142468	1.7819	0.0822037	0.653654
P70441	Na(+)/H(+) exchange regulatory cofactor NHE-RF1	Slc9a3r1	-0.137534	-1.78089	0.0823718	0.653654
Q6ZQ08	CCR4-NOT transcription complex subunit 1	Cnot1	0.349369	1.78017	0.0824915	0.653654
Q8VHW2	Voltage-dependent calcium channel gamma-8 subunit	Cacng8	-0.138075	-1.77736	0.0829591	0.653654
Q8CFV4	Neuritin	Nrn1	-0.2262	-1.77513	0.0833316	0.653654
Q9JKK7;Q9JHJ0	Tropomodulin-2	Tmod2	0.115772	1.77263	0.0837508	0.653654
O88848	ADP-ribosylation factor-like protein 6	Arl6	0.281065	1.77252	0.0837701	0.653654
Q99K51;Q3V0K9	Plastin-3	Pls3	0.127603	1.77018	0.084165	0.653654
Q9JHR7	Insulin-degrading enzyme	Ide	0.244437	1.76768	0.0845882	0.653654
Q9ESN6	Tripartite motif-containing protein 2	Trim2	0.0885123	1.76638	0.0848089	0.653654
Q3UJU9	Regulator of microtubule dynamics protein 3	Rmdn3	-0.201239	-1.76481	0.0850748	0.653654
P24270	Catalase	Cat	-0.217829	-1.76478	0.0850801	0.653654
P40124	Adenylyl cyclase-associated protein 1	Cap1	-0.100893	-1.7644	0.0851455	0.653654
P62322	U6 snRNA-associated Sm-like protein LSm5	Lsm5	0.269002	1.76351	0.0852968	0.653654
E9Q735	Ubiquitin conjugation factor E4 A	Ube4a	0.217964	1.76146	0.0856476	0.653654
Q8K0Z7	Translational activator of cytochrome c oxidase 1	Taco1	0.301462	1.76125	0.0856849	0.653654
P97461	40S ribosomal protein S5;40S ribosomal protein S5, N-terminally processed	Rps5	0.162252	1.76054	0.0858066	0.653654
Q99K10	Neuroligin-1	Nlgn1	-0.650438	-1.76025	0.0858561	0.653654
P08414;P58801	Calcium/calmodulin-dependent protein kinase type IV	Camk4	-0.321873	-1.75898	0.086074	0.653654
P50544	Very long-chain specific acyl-CoA dehydrogenase, mitochondrial	Acadvl	0.152485	1.75819	0.0862104	0.653654
Q62465	Synaptic vesicle membrane protein VAT-1 homolog	Vat1	0.151736	1.75681	0.086449	0.653654
Q9ERK4	Exportin-2	Cse1l	0.182458	1.7556	0.0866568	0.653654
Q6PIP5	NudC domain-containing protein 1	Nudcd1	-0.248678	-1.75545	0.0866835	0.653654
[truncated: 3,108 more rows]

## Sheet: Supplementary DataS2D_male
Supplementary DataS2D Analysis of differentially expressed proteins (DEP) in 5xFAD-DUSP4vs5xFAD in male mouse
[truncated: 3,580 more rows]
