# Supplementary material for: Proteomic Signaling of Dual-Specificity Phosphatase 4 (DUSP4) in Alzheimer’s Disease
Source: Biomolecules. 2024 Jan 3;14(1):66. doi: 10.3390/biom14010066 (PMC10813059; doi:10.3390/biom14010066)
Supplement: Supplementary file 1 [file biomolecules-14-00066-s001.zip › Supplementary.dataS3.xlsx]

## Sheet: Supplementary DataS3A_male
Supplementary DataS3A Analysis of differentially expressed PTM (DEPTM) in 5xFADvsWT in male mouse
siteIDs	uniprotIDs	logFC	AveExpr	t	P.Value	adj.P.Val
Akt1;S124	P31750;S124	1.68474	0.207018	3.96941	0.000272837	0.197225
Arhgap35;S975	Q91YM2;S975	-1.46899	2.98979	-4.18455	0.000140538	0.197225
Bcan;T544	Q61361;T544	1.37607	0.010276	3.96463	0.000276847	0.197225
Cep170b;S881	Q80U49;S881	2.46973	-1.60436	4.41718	6.77249e-05	0.197225
Irgq;S319	Q8VIM9;S319	0.961748	-3.05635	3.98736	0.000258271	0.197225
Itm2c;T39	Q91VK4;T39	1.5975	-0.179226	4.07069	0.00019995	0.197225
Map2;S1728	P20357;S1728	1.4641	-2.29833	4.25191	0.000113904	0.197225
Plcb1;S982	Q9Z1B3;S982	3.39549	0.670635	4.04925	0.000213598	0.197225
Ptprc;S964	P06800;S964	1.5805	-0.208842	4.3509	8.34871e-05	0.197225
Syt11;S113	Q9R0N3;S113	1.76333	-0.979344	4.30863	9.53569e-05	0.197225
Iqsec1;S923	Q8R0S2;S923	1.24265	1.43981	3.90719	0.000329772	0.213573
Apoe;S139	P08226;S139	1.74789	-0.271306	3.82017	0.000429048	0.235118
Gfap;S12	P03995;S12	1.71679	1.46513	3.82183	0.000426913	0.235118
Plekhf2;S16	Q91WB4;S16	1.11057	-0.316139	3.76577	0.0005052	0.239936
Tmem55a;S47	Q9CZX7;S47	1.44606	-0.544917	3.7731	0.000494214	0.239936
App;T743	P12023;T743	2.81472	-0.512506	3.73867	0.000547841	0.243926
Sgip1;S287	Q8VD37;S287	-1.30697	4.219	-3.7114	0.00059424	0.246713
Syn2;Y287	Q64332;Y287	1.58684	-1.67802	3.69531	0.000623362	0.246713
Arfgef3;S2054	Q3UGY8;S2054	1.3838	2.42631	3.66277	0.000686553	0.257421
Dock2;S1729	Q8C3J5;S1729	1.41767	-0.613274	3.63705	0.000740793	0.263871
Add2;S598	Q9QYB8;S598	-0.896721	3.3395	-3.54018	0.000984502	0.297351
Dlgap3;S510	Q6PFD5;S510	-1.14898	0.567522	-3.53423	0.00100174	0.297351
Pak4;S181	Q8BTW9;S181	1.4218	0.232183	3.53728	0.000992874	0.297351
Tmem55b;S169	Q3TWL2;S169	1.05861	2.4323	3.55202	0.000951037	0.297351
Add2;S602	Q9QYB8;S602	-0.997598	3.43143	-3.51624	0.00105566	0.30082
App;S441	P12023;S441	1.52597	-0.0236186	3.47701	0.00118302	0.323154
Clcn6;S774	O35454;S774	1.07482	-2.26741	3.45245	0.00127012	0.323154
Scg2;S555	Q03517;S555	-2.02492	0.663706	-3.45677	0.00125434	0.323154
Ank3;S1863	G5E8K5;S1863	1.00429	0.53898	3.42602	0.00137065	0.330083
Gfap;T40	P03995;T40	1.43394	0.148935	3.42114	0.00139002	0.330083
Akt3;S472	Q9WUA6;S472	1.56554	-1.2911	3.35851	0.00166311	0.34847
Bsn;S2649	O88737;S2649	-1.4944	-1.1939	-3.37879	0.00156951	0.34847
Pclo;S636	Q9QYX7;S636	-1.16734	0.971742	-3.37654	0.00157965	0.34847
Tnr;S724	Q8BYI9;S724	-1.42348	2.18069	-3.36744	0.00162125	0.34847
Efr3b;S214	Q6ZQ18;S214	-2.41706	0.110526	-3.30349	0.00194448	0.378591
Fmnl1;S184	Q9JL26;S184	0.755837	1.73488	3.29012	0.00201943	0.378591
Map2;T1632	P20357;T1632	1.24382	-0.258751	3.29572	0.00198773	0.378591
Vim;S39	P20152;S39	1.21273	-0.660516	3.30217	0.00195174	0.378591
Nedd4l;S512	Q8CFI0;S512	1.13203	0.181259	3.27043	0.00213477	0.389951
Sgip1;S27	Q8VD37;S27	-1.66992	0.723476	-3.26123	0.00219077	0.390177
Lamtor1;T28	Q9CQ22;T28	1.16342	-0.716749	3.23949	0.00232871	0.402811
Mast1;S1427	Q9R1L5;S1427	1.23192	0.272256	3.2325	0.0023748	0.402811
Bcl11b;S664	Q99PV8;S664	0.951989	-1.35568	3.16018	0.00290502	0.442334
Eps15l1;S610	Q60902;S610	-1.48356	-2.00463	-3.15854	0.00291826	0.442334
Fam21;S747	Q6PGL7;S747	0.728568	1.79926	3.16849	0.00283887	0.442334
Map1a;S1315	Q9QYR6;S1315	1.48132	-1.92336	3.175	0.00278799	0.442334
Shank3;S1134	Q4ACU6;S1134	1.18031	1.0577	3.16786	0.00284385	0.442334
Epn2;S173	Q8CHU3;S173	0.811415	1.86961	3.14137	0.00306028	0.454196
Kndc1;S267	Q0KK55;S267	0.779486	-2.88464	3.13089	0.00315014	0.457992
Ak5;S105	Q920P5;S105	1.36836	3.11321	3.07832	0.00363965	0.463015
Arfgef3;S2074	Q3UGY8;S2074	1.48523	0.199212	3.09464	0.00348053	0.463015
Bsn;S1530	O88737;S1530	1.05869	-0.181528	3.10685	0.00336573	0.463015
Efr3b;S216	Q6ZQ18;S216	-1.89591	0.455887	-3.09134	0.00351213	0.463015
Eif4g1;T1226	Q6NZJ6;T1226	0.951082	-0.909767	3.08162	0.00360688	0.463015
Palmd;S375	Q9JHU2;S375	-1.25131	-0.274238	-3.10443	0.00338821	0.463015
Rab7a;S72	P51150;S72	1.04405	-2.16619	3.09871	0.00344178	0.463015
Map2;S1139	P20357;S1139	-1.95396	4.86452	-3.0554	0.00387479	0.467865
Mark2;S566	Q05512;S566	1.14297	1.25207	3.06061	0.0038201	0.467865
Pbxip1;S164	Q3TVI8;S164	0.84911	0.616227	3.06051	0.0038211	0.467865
Gfap;T107	P03995;T107	0.803274	-2.10225	3.0383	0.00405936	0.481982
Kcnb1;S804	Q03717;S804	1.12656	1.94268	3.02872	0.00416642	0.483666
Syt5;S95	Q9R0N5;S95	1.00744	0.456731	3.02494	0.00420933	0.483666
Efr3b;S212	Q6ZQ18;S212	-1.73676	0.642158	-2.99774	0.00453095	0.504352
Syn1;S666	O88935;S666	0.858928	5.58645	2.99852	0.00452144	0.504352
Akap10;S281	O88845;S281	0.957928	-0.788214	2.93151	0.00541283	0.547397
Amigo1;S476	Q80ZD8;S476	0.759018	-4.24168	2.86705	0.00642301	0.547397
Arfgef3;S1881	Q3UGY8;S1881	1.1371	-1.71625	2.95384	0.00509891	0.547397
Arhgef12;S1185	Q8R4H2;S1185	1.45724	-2.37802	2.89563	0.00595516	0.547397
Brsk1;S311	Q5RJI5;S311	-0.981087	-0.796414	-2.86253	0.00650022	0.547397
Camlg;S53	P49070;S53	2.18282	-0.324585	2.89368	0.00598613	0.547397
Chgb;S129	P16014;S129	0.907456	4.57082	2.89237	0.00600698	0.547397
Dlgap4;S665	B1AZP2;S665	1.4416	-1.48936	2.90529	0.00580445	0.547397
Dpysl2;S540	O08553;S540	1.37852	1.30548	2.93508	0.0053615	0.547397
Epn1;S419	Q80VP1;S419	-1.27668	-0.795869	-2.94896	0.00516612	0.547397
Nrcam;S1254	Q810U4;S1254	1.8811	-0.894498	2.85178	0.00668689	0.547397
Phactr4;S620	Q501J7;S620	1.08366	-1.66431	2.85454	0.00663852	0.547397
Pkp4;S775	Q68FH0;S775	-0.823021	-1.65159	-2.92375	0.00552603	0.547397
Plekho2;T233	Q8K124;T233	1.08196	-0.53459	2.87725	0.00625234	0.547397
Ppig;S395	A2AR02;S395	0.853988	0.830485	2.8627	0.00649717	0.547397
Rab11fip2;S227	G3XA57;S227	0.945878	0.929044	2.85287	0.00666771	0.547397
Rap1gap;S484	A2ALS5;S484	0.844934	-0.592054	2.95753	0.00504875	0.547397
Sptbn1;S2340	Q62261;S2340	2.07559	3.77297	2.84755	0.00676179	0.547397
Stx6;S2	Q9JKK1;S2	1.47873	-0.947208	2.92075	0.00557047	0.547397
Sympk;S1276	Q80X82;S1276	1.10581	-1.91452	2.85239	0.00667612	0.547397
Tmem55a;S32	Q9CZX7;S32	1.60395	0.801874	2.85547	0.00662221	0.547397
Uba1;S876	Q02053;S876	0.79493	-0.355426	2.89917	0.00589959	0.547397
Uhrf1bp1l;S934	A2RSJ4;S934	1.26732	0.901446	2.92659	0.00548443	0.547397
Zdhhc5;S425	Q8VDZ4;S425	0.670351	-2.90784	2.88463	0.00613139	0.547397
Cntf;S7	P51642;S7	0.936716	-2.25366	2.83425	0.00700223	0.548174
Ptges3;S151	Q9R0Q7;S151	-2.4361	-1.54427	-2.84098	0.00687952	0.548174
Ywhaz;S207	P63101;S207	-1.14108	0.185832	-2.83831	0.00692786	0.548174
Gsk3b;S25	Q9WV60;S25	0.868229	0.669093	2.82503	0.0071734	0.549498
Pag1;S293	Q3U1F9;S293	0.973051	-0.318185	2.82669	0.00714238	0.549498
Adcy9;S373	P51830;S373	0.861365	-2.05737	2.67572	0.0105483	0.563197
Adcy9;S374	P51830;S374	0.909241	-2.07029	2.78667	0.00792878	0.563197
Ampd3;S85	O08739;S85	0.776925	0.0803169	2.65185	0.0112075	0.563197
Ank2;S1703	Q8C8R3;S1703	-1.81871	0.712591	-2.59072	0.0130711	0.563197
Ank3;S1114	G5E8K5;S1114	-1.18613	-2.05891	-2.62713	0.0119296	0.563197
Arhgap33;S1144	Q80YF9;S1144	0.813861	-1.49197	2.79244	0.00781071	0.563197
Atxn1l;T328	P0C7T6;T328	0.700642	-0.500648	2.67778	0.0104932	0.563197
Cacna1b;T1909	O55017;T1909	-0.585473	-0.766567	-2.64772	0.0113251	0.563197
Cadps;T483	Q80TJ1;T483	-1.02883	-0.378002	-2.67195	0.0106499	0.563197
Camsap2;S910	Q8C1B1;S910	0.77455	-1.72047	2.79856	0.00768707	0.563197
Ccdc85a;S295	Q5SP85;S295	0.852932	0.862551	2.59598	0.0129003	0.563197
Cldn11;S198	Q60771;S198	3.42355	4.39462	2.68592	0.0102779	0.563197
Cnksr2;S767	Q80YA9;S767	-1.20786	1.24711	-2.66187	0.0109262	0.563197
Cplx1;S93	P63040;S93	-1.17841	0.23207	-2.73388	0.00908937	0.563197
Dagla;S1032	Q6WQJ1;S1032	1.4609	3.94765	2.77728	0.00812472	0.563197
Dlgap1;S516	Q9D415;S516	-0.615065	-0.109814	-2.65053	0.011245	0.563197
Dnm3;S763	Q8BZ98;S763	-1.50618	-0.431561	-2.67476	0.0105741	0.563197
Dpysl2;S292	O08553;S292	1.06121	-0.83445	2.72623	0.00927002	0.563197
F11r;S285	O88792;S285	0.948997	-1.69971	2.66525	0.0108329	0.563197
Fam169a;S630	Q5XG69;S630	-0.977077	-2.06008	-2.76037	0.00848869	0.563197
Fam169a;S631	Q5XG69;S631	-0.937945	-2.05751	-2.61467	0.0123096	0.563197
Gatad2b;S123	Q8VHR5;S123	-0.89507	-1.75548	-2.63161	0.0117957	0.563197
Gpn1;S338	Q8VCE2;S338	-1.18984	-0.393539	-2.70927	0.00968245	0.563197
Gprc5b;S369	Q923Z0;S369	0.823494	-0.0243825	2.59038	0.0130823	0.563197
Hdgf;S133	P51859;S133	-1.09739	0.00779994	-2.70388	0.00981696	0.563197
Hspb8;S87	Q9JK92;S87	0.876112	-1.38134	2.62847	0.0118894	0.563197
Kctd8;S413	Q50H33;S413	0.81267	-2.53048	2.592	0.0130296	0.563197
Lifr;S922	P42703;S922	0.633416	-1.05921	2.63327	0.0117461	0.563197
Lrrc4b;S698	P0C192;S698	0.950891	2.28617	2.72489	0.00930195	0.563197
Mal2;S2	Q8BI08;S2	-0.853572	-2.25274	-2.7783	0.00810326	0.563197
Map1a;S1762	Q9QYR6;S1762	2.88459	1.115	2.61488	0.0123031	0.563197
Map1a;S873	Q9QYR6;S873	-1.61987	-0.00222468	-2.61115	0.0124188	0.563197
Map4;T657	P27546;T657	1.19773	2.40944	2.69784	0.00996984	0.563197
Mfsd6;T11	Q8CBH5;T11	-0.740704	0.809062	-2.78363	0.00799176	0.563197
Msh4;T261	Q99MT2;T261	1.03985	-1.11417	2.80955	0.00746995	0.563197
Necap2;S181	Q9D1J1;S181	0.719554	-1.03058	2.58336	0.0133137	0.563197
Nefh;S715	P19246;S715	0.664913	1.38633	2.60501	0.0126116	0.563197
Nefh;S721	P19246;S721	0.682742	1.384	2.65874	0.0110132	0.563197
Numb;T438	Q9QZS3;T438	1.01157	-0.744707	2.73602	0.00903929	0.563197
Numbl;S317	O08919;S317	0.971297	-0.617436	2.75773	0.00854693	0.563197
Pdap1;S60	Q3UHX2;S60	-1.28451	0.310964	-2.5906	0.013075	0.563197
Pi4k2a;S462	Q2TBE6;S462	0.781046	-0.306461	2.59523	0.0129247	0.563197
Plec;S4389	Q9QXS1;S4389	0.726901	-1.84388	2.67646	0.0105285	0.563197
Plec;S4393	Q9QXS1;S4393	0.941305	4.25339	2.58475	0.0132678	0.563197
Plekha1;S372	Q8BUL6;S372	0.801442	-1.02476	2.77489	0.00817518	0.563197
Ppme1;S25	Q8BVQ5;S25	1.0108	-1.17586	2.65306	0.011173	0.563197
Prkci;T411	Q62074;T411	-0.931786	-0.511206	-2.60905	0.0124844	0.563197
Prrt1;T103	O35449;T103	1.42121	1.10677	2.59227	0.0130207	0.563197
Prrt2;T214	E9PUL5;T214	-1.54065	1.30893	-2.73078	0.00916205	0.563197
Psd3;S998	Q2PFD7;S998	-1.72254	1.48831	-2.80687	0.00752236	0.563197
Psmd2;T20	Q8VDM4;T20	0.706552	2.15225	2.73531	0.00905596	0.563197
Ptges3;S148	Q9R0Q7;S148	-2.40217	-1.56682	-2.74282	0.00888233	0.563197
Purb;S316	O35295;S316	-0.75993	3.2661	-2.62065	0.0121258	0.563197
Purg;S163	Q8R4E6;S163	-1.05456	3.25065	-2.79912	0.00767596	0.563197
Rab10;S188	P61027;S188	-0.838391	-1.14986	-2.62927	0.0118653	0.563197
Rab11fip5;S530	Q8R361;S530	-0.934375	-0.193273	-2.62824	0.0118963	0.563197
Rab12;S20	P35283;S20	0.68618	1.85045	2.58196	0.0133605	0.563197
Ranbp3;S40	Q9CT10;S40	-1.09922	-0.150922	-2.59064	0.0130738	0.563197
Rasgrf1;S837	P27671;S837	-1.20744	0.804614	-2.63624	0.0116585	0.563197
Rims1;S745	Q99NE5;S745	-1.5273	-1.10713	-2.60728	0.01254	0.563197
Rufy3;S34	Q9D394;S34	0.841835	-1.89439	2.60587	0.0125847	0.563197
Sec31a;S531	Q3UPL0;S531	-1.01065	-1.29894	-2.63464	0.0117058	0.563197
Shisa6;T288	Q3UH99;T288	1.06773	2.72089	2.6146	0.0123115	0.563197
Sipa1l1;S1544	Q8C0T5;S1544	1.3906	0.381502	2.61732	0.0122279	0.563197
Slc1a2;S542	P43006;S542	0.765513	2.13821	2.70271	0.00984636	0.563197
Slc6a7;S22	Q6PGE7;S22	-1.26383	-1.33437	-2.58519	0.013253	0.563197
Slc9a3r1;S264	P70441;S264	0.934302	0.461262	2.69837	0.00995629	0.563197
Strip2;S331	Q8C9H6;S331	0.862771	-0.792572	2.64702	0.0113453	0.563197
Stx1a;S14	O35526;S14	-1.27322	2.56671	-2.58615	0.0132214	0.563197
Syt11;S133	Q9R0N3;S133	0.878052	-1.46234	2.63805	0.0116055	0.563197
Thrap3;S248	Q569Z6;S248	0.78647	2.38114	2.71969	0.00942692	0.563197
Tiam2;S1604	Q6ZPF3;S1604	1.21553	0.663764	2.59386	0.0129691	0.563197
Tmem185b;S333	Q8R3R5;S333	0.660095	-2.38409	2.6903	0.0101635	0.563197
Trappc9;S574	Q3U0M1;S574	1.03824	-2.7309	2.7465	0.00879841	0.563197
Znrf2;S147	Q71FD5;S147	-0.673767	-2.12213	-2.68221	0.0103754	0.563197
Zranb2;S188	Q9R020;S188	-0.78101	-1.44316	-2.64888	0.0112918	0.563197
Rftn2;T408	Q8CHX7;T408	1.01246	1.20888	2.5782	0.0134864	0.565159
Add2;S594	Q9QYB8;S594	-0.657287	4.50791	-2.56891	0.0138022	0.568362
Cep170b;S360	Q80U49;S360	-1.05459	1.38223	-2.5698	0.0137717	0.568362
Limch1;S303	Q3UH68;S303	1.48226	-2.26123	2.571	0.0137306	0.568362
Agap2;S632	Q3UHD9;S632	0.588459	1.53314	2.533	0.0150876	0.574321
Ahcyl2;S109	Q68FL4;S109	0.519936	4.22567	2.55424	0.0143147	0.574321
Ank2;S1562	Q8C8R3;S1562	0.753561	-0.402461	2.51036	0.0159531	0.574321
Ap2a1;T653	P17426;T653	-1.67658	1.24756	-2.51506	0.0157696	0.574321
Clip2;S18	Q9Z0H8;S18	0.960345	0.0637204	2.54394	0.0146847	0.574321
Csnk1d;S382	Q9DC28;S382	0.678454	-0.553323	2.49563	0.0165402	0.574321
Dmxl2;S473	Q8BPN8;S473	-1.7394	1.23084	-2.51933	0.015605	0.574321
Epb41l1;S441	Q9Z2H5;S441	-1.21782	0.736544	-2.51313	0.0158446	0.574321
Fam160b1;S187	Q8CDM8;S187	0.722979	-2.6345	2.52882	0.015244	0.574321
Fam63b;S99	Q6PDI6;S99	0.601126	-0.343565	2.49782	0.0164518	0.574321
Gpr37l1;T479	Q99JG2;T479	1.85628	-3.04612	2.55598	0.0142531	0.574321
Grm5;S1185	Q3UVX5;S1185	-1.07534	0.571607	-2.49606	0.0165227	0.574321
Hba;T135	P01942;T135	-1.01117	-1.31426	-2.53739	0.0149248	0.574321
Hcn2;S757	O88703;S757	1.3859	1.28798	2.54836	0.0145248	0.574321
Hspa8;T341	P63017;T341	0.690726	-1.30284	2.492	0.0166879	0.574321
Itpr1;S1588	P11881;S1588	-2.25833	0.67025	-2.51426	0.0158008	0.574321
Map2;S1240	P20357;S1240	-1.65884	4.66313	-2.50913	0.0160014	0.574321
Mtor;S2448	Q9JLN9;S2448	1.19766	-1.93741	2.50299	0.0162443	0.574321
Ndrg4;S306	Q8BTG7;S306	1.05803	1.35138	2.55631	0.0142414	0.574321
Oxr1;S346	Q4KMM3;S346	-1.64954	4.84909	-2.49273	0.0166579	0.574321
Pacs1;S529	Q8K212;S529	-2.87095	-0.230931	-2.50863	0.0160211	0.574321
Pafah1b2;T220	Q61206;T220	-2.25641	2.51975	-2.51248	0.01587	0.574321
Pclo;S4066	Q9QYX7;S4066	1.16935	0.388498	2.50702	0.0160845	0.574321
Pdap1;S63	Q3UHX2;S63	-1.0339	0.00780476	-2.55701	0.0142168	0.574321
Pex5l;S198	Q8C437;S198	1.29417	-1.728	2.49847	0.0164256	0.574321
Rab11fip5;S307	Q8R361;S307	0.51433	1.1331	2.53679	0.0149468	0.574321
Sgip1;T180	Q8VD37;T180	-1.63301	1.75982	-2.51622	0.0157249	0.574321
Shroom2;S935	A2ALU4;S935	0.775425	-0.794671	2.49891	0.016408	0.574321
Slc4a3;S13	P16283;S13	-1.15357	-2.61363	-2.51224	0.0158795	0.574321
Slc6a7;T20	Q6PGE7;T20	-1.24909	-1.26963	-2.51083	0.0159345	0.574321
Tjp2;S107	Q9Z0U1;S107	0.596539	2.47696	2.50356	0.0162218	0.574321
Tmem55a;T22	Q9CZX7;T22	1.07382	1.15741	2.51345	0.0158325	0.574321
Tubb4b;T219	P68372;T219	-0.86606	-1.28955	-2.54656	0.0145899	0.574321
Usp24;S2558	B1AY13;S2558	-0.695709	-2.24518	-2.50028	0.0163528	0.574321
Chd8;S1997	Q09XV5;S1997	0.619181	-1.84854	2.48413	0.0170123	0.574385
Hist1h1c;S2	P15864;S2	0.640997	-0.590277	2.48987	0.016775	0.574385
Lysmd1;S193	Q9D0E3;S193	1.07757	-0.547877	2.48498	0.016977	0.574385
Ppp1r2;S123	Q9DCL8;S123	-1.12598	0.0743515	-2.48526	0.0169652	0.574385
Aak1;S20	Q3UHJ0;S20	1.34779	-0.471088	2.48193	0.0171038	0.574389
Creb1;S142	Q01147;S142	0.856254	-1.35812	2.47733	0.0172969	0.574389
Elfn2;S750	Q68FM6;S750	0.612473	1.21045	2.47702	0.0173103	0.574389
Unc80;S526	Q8BLN6;S526	-0.790847	-0.438741	-2.47643	0.0173349	0.574389
Scn1a;S607	A2APX8;S607	0.800145	-2.09644	2.47341	0.017463	0.575957
Lmtk2;S742	Q3TYD6;S742	0.672613	-2.13558	2.45972	0.0180549	0.592732
Nbea;S2565	Q9EPN1;S2565	-0.778696	-2.04831	-2.45709	0.0181704	0.593788
Pde11a;S163	P0C1Q2;S163	-0.823145	0.012811	-2.45475	0.0182742	0.594455
Cep170;S1188	Q6A065;S1188	0.756032	-0.819864	2.45069	0.0184549	0.595895
Rnmt;S64	Q9D0L8;S64	0.75067	-0.0980566	2.45	0.0184858	0.595895
Ap3b1;S276	Q9Z1T1;S276	-0.651734	-0.489343	-2.42462	0.0196558	0.601859
Camsap1;S499	A2AHC3;S499	0.983521	0.0905843	2.43023	0.0193915	0.601859
Cap1;S307	P40124;S307	1.05374	2.14606	2.42662	0.0195611	0.601859
Cds2;S20	Q99L43;S20	-1.05038	0.71594	-2.40884	0.0204166	0.601859
Ctnnd2;S534	O35927;S534	-0.861025	0.996836	-2.40804	0.0204558	0.601859
Dagla;S943	Q6WQJ1;S943	-1.01762	-1.68552	-2.43138	0.0193379	0.601859
Dst;S7186	Q91ZU6;S7186	0.537221	0.902882	2.41729	0.0200058	0.601859
Fam189a2;S280	Q4FZH1;S280	0.767626	-1.86028	2.41054	0.0203332	0.601859
Gabbr2;S923	Q80T41;S923	-1.41425	0.968556	-2.42043	0.0198552	0.601859
Gfap;T147	P03995;T147	0.681602	-2.41505	2.42224	0.0197686	0.601859
Myo9a;S2458	Q8C170;S2458	0.785313	-1.68311	2.42818	0.019488	0.601859
Pikfyve;S307	Q9Z1T6;S307	1.61283	-1.47404	2.40695	0.0205091	0.601859
Pip5k1c;S659	O70161;S659	-1.34058	1.34359	-2.43934	0.0189694	0.601859
Pkp4;S514	Q68FH0;S514	-1.58915	1.47556	-2.41828	0.0199583	0.601859
Prkar2b;S83	P31324;S83	-1.39026	1.13247	-2.42477	0.0196485	0.601859
Rgs14;S289	P97492;S289	-1.02512	3.76966	-2.42042	0.0198558	0.601859
Rundc3a;S346	O08576;S346	0.996095	-0.443809	2.41166	0.0202785	0.601859
S1pr1;S351	O08530;S351	0.92464	0.167164	2.41143	0.0202898	0.601859
Srcin1;S579	Q9QWI6;S579	-0.817414	2.67222	-2.42833	0.0194809	0.601859
Sv2a;S80	Q9JIS5;S80	-3.00901	0.598863	-2.40654	0.0205294	0.601859
Tjp2;S968	Q9Z0U1;S968	0.664846	-0.556718	2.42921	0.0194393	0.601859
Tubb6;S371	Q922F4;S371	1.09053	-2.40329	2.43003	0.0194008	0.601859
Synpo;S488	Q8CC35;S488	0.976287	0.534111	2.40451	0.0206298	0.602322
Pkp4;S511	Q68FH0;S511	-1.11999	2.54129	-2.39905	0.0209015	0.605715
Ppme1;S243	Q8BVQ5;S243	-1.05774	1.82647	-2.39876	0.020916	0.605715
Ablim1;S411	Q8K4G5;S411	0.842802	2.52949	2.27054	0.0283072	0.606271
Add2;S606	Q9QYB8;S606	-1.50796	3.40348	-2.3563	0.0231444	0.606271
Arf3;S147	P61205;S147	-0.559948	-1.95012	-2.27728	0.0278666	0.606271
Arfgap1;S347	Q9EPJ9;S347	-0.858367	0.909591	-2.34098	0.0239995	0.606271
Arhgap32;S592	Q811P8;S592	0.779575	-2.26325	2.2821	0.0275559	0.606271
Arhgap39;S282	P59281;S282	0.594554	-0.770963	2.27824	0.0278048	0.606271
Atg2b;S1017	Q80XK6;S1017	-0.916143	-0.808871	-2.27105	0.0282734	0.606271
Atp1a2;S439	Q6PIE5;S439	-1.43688	-0.0806654	-2.32132	0.0251382	0.606271
Basp1;S192	Q91XV3;S192	-1.07845	1.11131	-2.35808	0.0230471	0.606271
Caskin1;T783	Q6P9K8;T783	0.723152	-0.725331	2.28299	0.0274985	0.606271
Cdc42bpa;S1532	Q3UU96;S1532	0.769826	-1.54228	2.3218	0.0251102	0.606271
Cecr6;S527	Q99MX7;S527	-1.02457	0.877885	-2.27482	0.0280264	0.606271
Chrm2;S232	Q9ERZ4;S232	0.70925	-0.0829935	2.38978	0.0213707	0.606271
Clip1;S203	Q922J3;S203	0.675994	-0.105508	2.37398	0.0221922	0.606271
Clip1;S311	Q922J3;S311	0.894681	-1.38035	2.3665	0.0225905	0.606271
Clstn3;S951	Q99JH7;S951	1.04803	-0.277585	2.28458	0.0273968	0.606271
Clvs2;S302	Q8BG92;S302	0.861982	-0.17155	2.32833	0.024727	0.606271
Dbn1;T394	Q9QXS6;T394	1.39819	-0.138463	2.32133	0.0251379	0.606271
Dgkg;S107	Q91WG7;S107	-0.806636	0.306856	-2.27091	0.0282827	0.606271
Dlgap4;S13	B1AZP2;S13	1.15778	-1.05934	2.30138	0.0263426	0.606271
Dmtn;S226	Q9WV69;S226	-0.756601	2.32022	-2.336	0.0242837	0.606271
Dzip3;S1107	Q7TPV2;S1107	1.10288	0.543744	2.30402	0.0261801	0.606271
Eml3;S177	Q8VC03;S177	0.621997	-3.32523	2.32703	0.024803	0.606271
Exosc5;S23	Q9CRA8;S23	0.848953	-0.340747	2.33036	0.0246089	0.606271
Fgf13;S208	P70377;S208	-0.737397	0.756171	-2.35063	0.023458	0.606271
Fzd2;T199	Q9JIP6;T199	-0.572553	-1.90619	-2.30604	0.0260564	0.606271
Gabbr2;S919	Q80T41;S919	-1.77999	0.68466	-2.31761	0.0253584	0.606271
Gapdh;S208	P16858;S208	0.666382	1.8957	2.28728	0.0272252	0.606271
Gart;S467	Q64737;S467	-0.646662	-3.01349	-2.27034	0.0283201	0.606271
Hepacam;S385	Q640R3;S385	3.36429	3.57223	2.3733	0.0222279	0.606271
Inpp5f;S908	Q8CDA1;S908	0.714595	1.55362	2.32084	0.025167	0.606271
Inpp5f;S936	Q8CDA1;S936	1.34856	0.773067	2.35506	0.0232127	0.606271
Itsn1;S315	Q9Z0R4;S315	1.08509	0.0614904	2.29242	0.0269002	0.606271
Itsn2;S843	Q9Z0R6;S843	0.791062	0.848078	2.32082	0.0251681	0.606271
Jph3;S457	Q9ET77;S457	-1.0522	-1.74505	-2.3033	0.0262241	0.606271
Kalrn;S1771	A2CG49;S1771	-0.639246	0.256031	-2.31987	0.025224	0.606271
Kcna2;S441	P63141;S441	-1.3351	0.274752	-2.34684	0.0236694	0.606271
Kiaa1109;S2603	A2AAE1;S2603	0.851374	0.177469	2.32756	0.0247717	0.606271
Kiaa1467;S63	Q8BYI8;S63	-1.139	0.0190414	-2.33437	0.024377	0.606271
Kif1b;S1487	Q60575;S1487	0.900039	-0.435011	2.31898	0.025277	0.606271
Madd;T1060	Q80U28;T1060	0.757532	-0.11416	2.28568	0.0273269	0.606271
Map4;S809	P27546;S809	-1.07282	-0.471285	-2.3135	0.0256045	0.606271
Map6d1;S155	Q14BB9;S155	1.93766	-0.754785	2.32657	0.0248298	0.606271
Mycbp2;S2861	Q7TPH6;S2861	0.596121	0.551097	2.27552	0.0279812	0.606271
Nbea;S1311	Q9EPN1;S1311	-1.43875	0.160936	-2.31297	0.0256367	0.606271
Necap2;T180	Q9D1J1;T180	0.751207	-1.47274	2.29018	0.0270412	0.606271
Nefm;S715	P08553;S715	-1.12336	1.57461	-2.30186	0.0263129	0.606271
Nppb;S109	P40753;S109	-0.797185	1.69968	-2.32852	0.0247161	0.606271
Nppb;S111	P40753;S111	-0.816462	1.689	-2.29005	0.0270498	0.606271
Nudc;S139	O35685;S139	-0.738693	-0.375418	-2.30325	0.0262276	0.606271
Osbp;S349	Q3B7Z2;S349	-1.10264	0.71223	-2.35444	0.0232467	0.606271
Otud4;S1016	B2RRE7;S1016	-0.973667	0.262438	-2.27447	0.0280495	0.606271
Palm;T145	Q9Z0P4;T145	-0.634777	4.02336	-2.35932	0.0229796	0.606271
Pclo;T4064	Q9QYX7;T4064	0.90842	-1.43039	2.36755	0.0225343	0.606271
Poldip3;S127	Q8BG81;S127	1.30218	-1.23588	2.30648	0.0260296	0.606271
Ppp1r12a;T596	Q9DBR7;T596	1.08959	0.489683	2.31441	0.0255502	0.606271
Ppp1r14a;S136	Q91VC7;S136	1.23122	-1.47918	2.36825	0.0224969	0.606271
Prkab2;S107	Q6PAM0;S107	0.593612	0.127096	2.27005	0.0283392	0.606271
Prkacb;S339	P68181;S339	0.709162	-1.59292	2.35958	0.0229653	0.606271
Psd3;S1009	Q2PFD7;S1009	-0.5524	4.09496	-2.29411	0.026794	0.606271
Purb;S6	O35295;S6	-0.995704	1.64921	-2.2785	0.0277876	0.606271
Rap1gap;T486	A2ALS5;T486	1.33398	-0.616792	2.37224	0.0222843	0.606271
Rrn3;S42	B2RS91;S42	0.742286	-2.41409	2.35864	0.0230164	0.606271
Rtn3;S233	Q9ES97;S233	-1.86456	1.96462	-2.27019	0.0283296	0.606271
Rundc3a;S232	O08576;S232	1.16823	0.499339	2.35991	0.0229473	0.606271
Scn2a1;S554	B1AWN6;S554	0.972711	1.23575	2.36161	0.0228545	0.606271
Sh3bp1;S535	P55194;S535	0.814903	0.974738	2.3116	0.0257193	0.606271
Sik3;S533	Q6P4S6;S533	-2.28596	-0.639602	-2.29974	0.026444	0.606271
Slc12a5;S963	Q91V14;S963	0.438534	4.33437	2.32648	0.024835	0.606271
Son;S1723	Q9QX47;S1723	0.56491	-1.64984	2.3455	0.0237442	0.606271
Sorbs2;S315	Q3UTJ2;S315	0.820357	-0.381408	2.33274	0.0244712	0.606271
Sphk2;S364	Q9JIA7;S364	0.848272	1.70755	2.32409	0.024975	0.606271
Sptan1;S1190	P16546;S1190	-1.49262	1.18705	-2.37771	0.0219953	0.606271
Stim2;S28	P83093;S28	0.814832	1.11712	2.34566	0.0237353	0.606271
Stxbp5l;S792	Q5DQR4;S792	0.683885	-1.8539	2.29398	0.0268027	0.606271
Syn3;S483	Q8JZP2;S483	-1.80174	0.46067	-2.35646	0.0231357	0.606271
Syngap1;Y34	F6SEU4;Y34	0.970255	0.212689	2.33437	0.0243774	0.606271
Syt7;S52	Q9R0N7;S52	-0.945571	0.0765612	-2.3242	0.0249688	0.606271
Tjp1;T1423	P39447;T1423	1.02456	-0.849713	2.32373	0.0249961	0.606271
Ttbk1;S432	Q6PCN3;S432	1.74043	-0.560867	2.38529	0.0216014	0.606271
Ttc1;S69	Q91Z38;S69	0.68997	3.39221	2.3578	0.0230626	0.606271
Ube3b;S421	Q9ES34;S421	0.593879	0.712894	2.29513	0.0267303	0.606271
Usp9x;S2547	P70398;S2547	0.878572	-0.0919472	2.33216	0.0245049	0.606271
Uvssa;S15	Q9D479;S15	-1.29793	2.80797	-2.28285	0.0275078	0.606271
Uvssa;T14	Q9D479;T14	-1.36132	2.79969	-2.37388	0.0221971	0.606271
Vti1b;S138	O88384;S138	0.637694	-0.573	2.3645	0.0226984	0.606271
Wdr37;S254	Q8CBE3;S254	-1.17995	1.79249	-2.28325	0.0274819	0.606271
Aldoa;S39	P05064;S39	0.642154	2.8298	2.26677	0.0285558	0.607532
Bsn;T55	O88737;T55	0.880515	0.742402	2.25911	0.0290674	0.607532
Dos;S389	Q66L44;S389	-0.653023	1.25249	-2.26391	0.0287455	0.607532
Inpp5f;S941	Q8CDA1;S941	1.69578	0.535052	2.2611	0.0289339	0.607532
Nfasc;S1226	Q810U3;S1226	-1.33155	-1.26742	-2.26564	0.0286309	0.607532
Otud4;S1017	B2RRE7;S1017	-0.943446	0.27932	-2.25765	0.0291656	0.607532
Sept4;S117	P28661;S117	-1.24412	1.25735	-2.2579	0.0291488	0.607532
Srgap3;S919	Q812A2;S919	0.950901	0.413942	2.25874	0.0290926	0.607532
Uba1;S835	Q02053;S835	0.624318	2.26558	2.26097	0.0289423	0.607532
Ctnnb1;T551	Q02248;T551	0.903338	2.45587	2.25391	0.0294191	0.6095
Sptbn1;S2163	Q62261;S2163	-2.16411	3.5214	-2.25374	0.0294312	0.6095
Myo9b;S1218	Q9QY06;S1218	1.25187	-1.94291	2.2523	0.0295293	0.609759
Ap2a1;T650	P17426;T650	-1.60823	-0.744433	-2.24509	0.0300253	0.612895
Flad1;S468	Q8R123;S468	1.01779	-0.58552	2.24877	0.0297712	0.612895
Sptbn1;T2186	Q62261;T2186	0.666555	-0.890204	2.24677	0.0299091	0.612895
Tpd52;S175	Q62393;S175	0.554563	2.69963	2.2459	0.0299693	0.612895
Gtpbp1;S44	O08582;S44	-1.03223	0.268942	-2.23938	0.030423	0.617913
Nyap2;S238	Q8BM65;S238	0.758071	-1.47299	2.23907	0.0304446	0.617913
Prkce;S316	P16054;S316	1.5311	-0.970165	2.23681	0.0306038	0.619379
Atg2b;S885	Q80XK6;S885	-0.653795	-0.327394	-2.22933	0.0311352	0.620054
Brsk2;S413	Q69Z98;S413	1.03211	0.15406	2.22336	0.0315654	0.620054
Coro1a;T418	O89053;T418	0.946138	0.127947	2.22563	0.0314009	0.620054
Kif2a;S139	P28740;S139	0.47429	3.523	2.22832	0.0312077	0.620054
Map1b;S1307	P14873;S1307	0.526307	7.48242	2.22928	0.0311387	0.620054
Plcb1;S978	Q9Z1B3;S978	-0.826989	0.299936	-2.22957	0.0311178	0.620054
Ranbp3;S257	Q9CT10;S257	0.735871	0.31677	2.22421	0.0315033	0.620054
Rtn4;S768	Q99P72;S768	0.682385	5.07372	2.22593	0.0313792	0.620054
Tanc2;S1744	A2A690;S1744	1.4241	-0.11574	2.22984	0.0310985	0.620054
Ubap2l;S482	Q80X50;S482	-0.892363	-0.0750649	-2.22295	0.0315945	0.620054
Wdr47;S559	Q8CGF6;S559	0.962613	0.519785	2.2288	0.031173	0.620054
Glcci1;S293	Q8K3I9;S293	1.13477	-1.50189	2.22145	0.0317039	0.62049
Homer3;S159	Q99JP6;S159	-1.51423	1.67273	-2.21973	0.0318292	0.621236
Map3k7;S412	Q62073;S412	0.755794	0.635331	2.21593	0.0321073	0.62325
Snapin;T14	Q9Z266;T14	0.74074	-0.97001	2.21676	0.0320467	0.62325
Ahsg;S314	P29699;S314	1.14464	0.811841	2.17273	0.0354284	0.623775
Ap2a1;S655	P17426;S655	-1.1144	1.80492	-2.14037	0.0381106	0.623775
Ap3d1;S686	O54774;S686	0.979318	0.349339	2.14019	0.0381262	0.623775
Arglu1;S264	Q3UL36;S264	0.804744	-2.24281	2.1799	0.0348569	0.623775
Arhgef12;S190	Q8R4H2;S190	0.589988	0.0954503	2.19234	0.0338847	0.623775
Cacna1e;S15	Q61290;S15	-0.616551	2.44931	-2.18284	0.0346246	0.623775
Caskin1;S637	Q6P9K8;S637	-1.23602	-0.727841	-2.17393	0.0353322	0.623775
Caskin1;T741	Q6P9K8;T741	1.02386	0.744774	2.15062	0.0372425	0.623775
Cdc23;S588	Q8BGZ4;S588	0.648287	-2.02373	2.15587	0.0368045	0.623775
Cmtm4;S194	Q8CJ61;S194	-0.617454	1.08299	-2.17146	0.0355303	0.623775
Cnksr2;S488	Q80YA9;S488	0.655147	-2.32623	2.19882	0.033388	0.623775
Cnot4;S2	Q8BT14;S2	-0.705138	-2.06987	-2.20627	0.0328252	0.623775
Ctnna1;S655	P26231;S655	0.989785	1.58923	2.20194	0.0331511	0.623775
Ctnnd1;S349	P30999;S349	1.15332	-0.607492	2.18881	0.0341585	0.623775
Ctr9;S970	Q62018;S970	-0.803301	-0.995804	-2.19903	0.0333722	0.623775
Dclk1;S2	Q9JLM8;S2	1.373	-1.76679	2.17003	0.0356453	0.623775
Dlg4;T482	Q62108;T482	-0.605129	-1.43869	-2.16516	0.0360403	0.623775
Dmwd;S537	Q08274;S537	-0.937389	0.622602	-2.15293	0.0370491	0.623775
Dmxl2;S1141	Q8BPN8;S1141	-1.05833	0.157197	-2.18505	0.0344516	0.623775
Dmxl2;S221	Q8BPN8;S221	0.65254	-0.827134	2.14597	0.0376341	0.623775
Efr3a;S220	Q8BG67;S220	-0.933676	-0.248836	-2.13961	0.038176	0.623775
Eps15l1;S108	Q60902;S108	0.817988	-1.17837	2.14821	0.037445	0.623775
Eps8;S684	Q08509;S684	0.748042	-1.54306	2.17198	0.0354883	0.623775
Evl;S329	P70429;S329	0.700296	1.51554	2.16399	0.036136	0.623775
Fam73b;T206	Q8BK03;T206	0.773077	0.447738	2.1714	0.0355351	0.623775
Flnc;S2234	Q8VHX6;S2234	1.83112	-1.84957	2.18606	0.0343729	0.623775
Gatad2b;T121	Q8VHR5;T121	-0.795391	-1.72171	-2.19134	0.0339618	0.623775
Gpr158;S699	Q8C419;S699	0.87532	0.391903	2.1885	0.034182	0.623775
Gpr162;S539	Q3UN16;S539	-0.676379	-0.722619	-2.20752	0.0327313	0.623775
Map1a;S1747	Q9QYR6;S1747	-0.480393	1.26351	-2.14818	0.0374474	0.623775
Map1a;T2064	Q9QYR6;T2064	-3.47515	1.42211	-2.16463	0.0360833	0.623775
Map1s;S573	Q8C052;S573	-0.985093	0.495016	-2.16805	0.0358055	0.623775
Map2;S1545	P20357;S1545	1.02954	-0.614076	2.16517	0.0360394	0.623775
Map2;S1635	P20357;S1635	0.765472	0.774639	2.14342	0.0378508	0.623775
Map7d1;S548	A2AJI0;S548	-0.79211	1.86564	-2.17132	0.0355412	0.623775
Map7d1;T49	A2AJI0;T49	-1.17231	-0.00155965	-2.16243	0.0362637	0.623775
Mcf2l;S976	Q64096;S976	0.900107	0.0241865	2.20375	0.0330148	0.623775
Mcoln1;S547	Q99J21;S547	1.52352	-0.192801	2.18238	0.0346613	0.623775
Nedd4l;S477	Q8CFI0;S477	1.09272	1.83754	2.14376	0.0378216	0.623775
Nos1;S283	Q9Z0J4;S283	0.84124	-0.983976	2.16155	0.0363357	0.623775
Numb;S440	Q9QZS3;S440	0.863742	-0.772287	2.1763	0.0351429	0.623775
Pclo;S1642	Q9QYX7;S1642	-1.18029	-0.570492	-2.17598	0.035168	0.623775
Pi4kb;S511	Q8BKC8;S511	0.466073	0.758767	2.14236	0.0379404	0.623775
Plek;S117	Q9JHK5;S117	0.975139	-2.14396	2.14969	0.0373201	0.623775
Prkcg;S148	P63318;S148	0.783193	-1.71299	2.1904	0.0340352	0.623775
Prkcg;S70	P63318;S70	1.41861	-2.07426	2.16809	0.0358026	0.623775
Prrc2a;T825	Q7TSC1;T825	0.921394	-0.405277	2.14247	0.0379313	0.623775
Psd3;T1029	Q2PFD7;T1029	-1.55113	0.603419	-2.19806	0.0334462	0.623775
Ptprn2;S422	P80560;S422	1.92591	0.327964	2.20674	0.0327897	0.623775
Ranbp3;S33	Q9CT10;S33	-0.943552	-0.154202	-2.17674	0.0351076	0.623775
Rasgrp1;S693	Q9Z1S3;S693	0.680444	-1.86021	2.20151	0.0331836	0.623775
Rbm5;S59	Q91YE7;S59	-0.630794	-0.451023	-2.17452	0.0352851	0.623775
Rps6kb1;S447	Q8BSK8;S447	0.74315	-2.91265	2.15481	0.0368925	0.623775
Sdcbp;S6	O08992;S6	-0.858513	-1.05991	-2.14887	0.0373897	0.623775
Sdhaf4;S56	Q8BTE0;S56	-0.579141	-0.111192	-2.17518	0.0352317	0.623775
Sec22b;S137	O08547;S137	-1.21575	0.499039	-2.14388	0.0378112	0.623775
Sgip1;S300	Q8VD37;S300	-1.30434	3.50754	-2.19026	0.0340456	0.623775
Shank1;S869	D3YZU1;S869	0.842695	-1.2429	2.16628	0.0359491	0.623775
Shank3;S801	Q4ACU6;S801	-2.05882	-0.124948	-2.2071	0.0327628	0.623775
Slc32a1;S95	O35633;S95	-1.03249	2.01606	-2.14619	0.0376155	0.623775
Slc9a3r1;S297	P70441;S297	-0.893186	1.84134	-2.15754	0.0366658	0.623775
Sptbn1;S2168	Q62261;S2168	-0.961582	4.11426	-2.15056	0.0372471	0.623775
Srrm2;S1998	Q8BTI8;S1998	-0.727771	1.32541	-2.15408	0.0369533	0.623775
Srsf9;S212	Q9D0B0;S212	0.851818	0.0866088	2.17346	0.0353694	0.623775
Syngap1;S895	F6SEU4;S895	-0.948096	-1.6245	-2.15649	0.0367527	0.623775
Thrap3;S935	Q569Z6;S935	-0.467787	2.14229	-2.18207	0.0346853	0.623775
Ttbk1;S631	Q6PCN3;S631	-0.74589	-0.388987	-2.19848	0.0334137	0.623775
Ttyh1;S440	Q9D3A9;S440	-0.783467	-1.32685	-2.17391	0.0353335	0.623775
Usp9x;S2443	P70398;S2443	0.678086	0.926671	2.14799	0.0374632	0.623775
Shank3;T1234	Q4ACU6;T1234	0.673005	0.96347	2.1371	0.0383919	0.625867
Dmtn;S279	Q9WV69;S279	0.715221	1.85792	2.13606	0.0384812	0.625891
Bsn;S3301	O88737;S3301	-0.721714	1.43105	-2.13345	0.0387076	0.626711
Sugp2;S740	Q8CH09;S740	0.905568	0.858325	2.13419	0.0386429	0.626711
Map4;S617	P27546;S617	0.781532	-2.98422	2.13221	0.0388148	0.627022
Npm1;S4	Q61937;S4	0.768336	-0.407294	2.12817	0.0391679	0.631294
Synpo;S689	Q8CC35;S689	1.39201	-0.985204	2.12704	0.0392669	0.631461
Clasp2;S319	Q8BRT1;S319	0.599498	0.298012	2.12392	0.0395418	0.631955
Crbn;S25	Q8C7D2;S25	-0.679904	-0.509867	-2.12494	0.0394522	0.631955
Shank1;S1054	D3YZU1;S1054	1.02998	-3.04994	2.12367	0.0395637	0.631955
Lmna;S392	P48678;S392	-1.08328	0.220677	-2.1217	0.0397384	0.632818
Tmem240;S169	B2RWJ3;S169	-1.83812	-1.87374	-2.12106	0.0397954	0.632818
Dync1i1;S94	O88485;S94	-0.664489	-2.29072	-2.11886	0.0399914	0.634518
Bcas1;S601	Q80YN3;S601	0.477514	1.90416	2.11784	0.0400825	0.634551
Adcy9;S27	P51830;S27	-0.721624	0.483149	-2.10234	0.0414906	0.635154
Add3;S423	Q9QYB5;S423	0.522999	1.21286	2.09398	0.0422682	0.635154
Ahsg;S309	P29699;S309	0.963863	-1.08186	2.10291	0.0414378	0.635154
Ank2;S3786	Q8C8R3;S3786	0.50941	2.74891	2.09537	0.0421376	0.635154
Bag6;T985	Q9Z1R2;T985	1.03271	1.12907	2.09271	0.0423872	0.635154
Bsn;S1100	O88737;S1100	-0.715035	-1.34482	-2.10981	0.0408069	0.635154
C2cd2l;S660	Q80X80;S660	2.44498	1.21689	2.10244	0.0414817	0.635154
Coro7;S912	Q9D2V7;S912	-0.642386	-0.772215	-2.10146	0.041572	0.635154
Dgkb;S95	Q6NS52;S95	-1.87159	1.4478	-2.11261	0.040553	0.635154
Dnajc6;S490	Q80TZ3;S490	-1.27693	3.21753	-2.10018	0.04169	0.635154
Dpysl2;T512	O08553;T512	0.915925	0.770025	2.09216	0.0424387	0.635154
Epb41l1;S69	Q9Z2H5;S69	-1.26385	0.579076	-2.09697	0.0419885	0.635154
Gnao1;S207	P18872;S207	-0.51315	-1.24416	-2.09315	0.0423456	0.635154
Kcnh7;S1188	Q9ER47;S1188	-0.74879	-0.00837078	-2.10223	0.041501	0.635154
Kcnk1;S326	O08581;S326	0.851895	-0.927852	2.09988	0.041718	0.635154
Kiaa1045;T100	Q80TL4;T100	-0.544841	-2.09829	-2.1097	0.0408165	0.635154
Lsm14a;T194	Q8K2F8;T194	1.21728	-0.347506	2.09546	0.0421297	0.635154
Mycbp2;T3992	Q7TPH6;T3992	0.796992	0.204727	2.09589	0.0420893	0.635154
Myt1l;S865	P97500;S865	0.717253	-1.16492	2.10647	0.0411115	0.635154
Nadk2;S176	Q8C5H8;S176	0.774799	-1.62242	2.10717	0.0410477	0.635154
Numa1;S1739	E9Q7G0;S1739	0.472921	0.945183	2.11429	0.0404015	0.635154
Pclo;S1708	Q9QYX7;S1708	-1.62519	2.00103	-2.09941	0.0417618	0.635154
Pclo;S2288	Q9QYX7;S2288	1.34156	1.58075	2.11574	0.0402709	0.635154
Pclo;S4290	Q9QYX7;S4290	-1.0874	0.176992	-2.09516	0.0421575	0.635154
Smarcad1;S127	Q04692;S127	-0.575342	-1.7296	-2.10059	0.0416521	0.635154
Trim28;S51	Q62318;S51	0.686253	3.46291	2.10303	0.0414273	0.635154
Bmpr2;S515	O35607;S515	0.891111	0.21806	2.07731	0.0438559	0.635614
Braf;S766	P28028;S766	-1.71225	1.66316	-2.05277	0.0462886	0.635614
Bsn;T2595	O88737;T2595	-0.586245	2.69167	-2.06013	0.0455476	0.635614
C2cd4cC2CD4 family;S153	Q5HZI2;S153	0.687286	1.18909	2.0747	0.0441092	0.635614
Cep170b;S653	Q80U49;S653	-0.775432	-1.92929	-2.05222	0.0463445	0.635614
Clip2;S39	Q9Z0H8;S39	0.771914	1.24025	2.05095	0.0464744	0.635614
Crocc;S1483	Q8CJ40;S1483	-0.646614	-2.71403	-2.04822	0.0467524	0.635614
Ctnna2;S654	Q61301;S654	0.844694	1.64936	2.05538	0.0460247	0.635614
Dffa;S314	O54786;S314	0.799078	-1.74855	2.08008	0.0435888	0.635614
Dlg4;S422	Q62108;S422	1.05387	0.755557	2.06339	0.0452223	0.635614
Dpysl2;S542	O08553;S542	0.669172	2.61617	2.06895	0.044672	0.635614
Eepd1;T134	Q3TGW2;T134	1.0936	-1.59589	2.08214	0.0433909	0.635614
Elfn1;S773	Q8C8T7;S773	0.523575	-2.25231	2.07828	0.043762	0.635614
Epb41l1;S639	Q9Z2H5;S639	-2.55897	0.225211	-2.05887	0.0456736	0.635614
Epb41l1;S650	Q9Z2H5;S650	-1.72234	3.42448	-2.0679	0.0447751	0.635614
Eps15l1;S558	Q60902;S558	-0.934115	1.13809	-2.06118	0.0454426	0.635614
Farp1;S433	F8VPU2;S433	1.09403	2.2605	2.05439	0.0461249	0.635614
Gab1;S420	Q9QYY0;S420	0.704258	-1.2578	2.06416	0.0451455	0.635614
Garnl3;T901	Q3V0G7;T901	0.771457	-2.7771	2.06688	0.0448762	0.635614
Hnrnpul2;S183	Q00PI9;S183	-1.1249	0.151907	-2.06	0.0455606	0.635614
Igf2r;S2476	Q07113;S2476	-1.10878	-2.09524	-2.06985	0.044584	0.635614
Iqsec3;S256	Q3TES0;S256	0.788098	0.20336	2.05043	0.0465271	0.635614
Irf2bp2;S300	E9Q1P8;S300	0.752639	-0.627492	2.08284	0.0433241	0.635614
Kcnab2;S9	P62482;S9	0.675489	1.60373	2.0432	0.0472687	0.635614
Kiaa1671;S205	Q8BRV5;S205	-0.628317	1.04489	-2.05637	0.0459252	0.635614
Ksr1;S320	Q61097;S320	1.64253	-0.460721	2.06998	0.0445707	0.635614
Lmnb2;S427	P21619;S427	-1.49098	0.932855	-2.07133	0.0444383	0.635614
Lphn1;T1167	Q80TR1;T1167	0.677117	-1.31566	2.04597	0.0469833	0.635614
Map2;S938	P20357;S938	0.654737	4.54323	2.05569	0.0459938	0.635614
Map2k2;S23	Q63932;S23	0.978174	-0.50501	2.05068	0.0465011	0.635614
Nefh;T839	P19246;T839	0.551727	3.97146	2.05981	0.0455791	0.635614
Nkap;S147	Q9D0F4;S147	-1.10998	-3.03571	-2.08715	0.0429123	0.635614
Pacs1;S517	Q8K212;S517	-0.90145	3.18407	-2.07862	0.0437296	0.635614
Pclo;S1808	Q9QYX7;S1808	-1.95373	-1.01992	-2.08631	0.0429924	0.635614
Phactr3;S277	Q8BYK5;S277	0.619812	-1.03205	2.04788	0.0467873	0.635614
Rplp0;S307	P14869;S307	-1.81899	0.162674	-2.07223	0.0443501	0.635614
Sh2d3c;S435	Q9QZS8;S435	-0.845716	-0.164939	-2.04394	0.0471923	0.635614
Shisa7;S317	Q8C3Q5;S317	0.833687	-1.12652	2.08806	0.0428264	0.635614
Slc26a6;S751	Q8CIW6;S751	-0.714329	0.0719998	-2.04302	0.0472874	0.635614
Sptbn1;S2102	Q62261;S2102	0.780974	3.47566	2.04855	0.0467188	0.635614
Srcin1;S1054	Q9QWI6;S1054	-0.303118	5.64517	-2.05837	0.0457238	0.635614
Srcin1;S1110	Q9QWI6;S1110	-0.470024	5.21243	-2.08727	0.042901	0.635614
Srrm2;T2056	Q8BTI8;T2056	-1.05869	-0.0666359	-2.06726	0.0448392	0.635614
Stk24;S4	Q99KH8;S4	0.923984	0.816835	2.04424	0.0471614	0.635614
Sv2a;S81	Q9JIS5;S81	-2.52725	0.750978	-2.06658	0.0449057	0.635614
Syn2;T422	Q64332;T422	0.443528	4.89032	2.08836	0.0427976	0.635614
Synpo;S672	Q8CC35;S672	0.508362	1.99253	2.04845	0.0467289	0.635614
Tjp1;S1614	P39447;S1614	1.19716	0.642987	2.04902	0.0466705	0.635614
Tmem9b;S143	Q9JJR8;S143	0.667456	-0.278405	2.05439	0.0461244	0.635614
Tprn;S457	A2AI08;S457	0.806443	0.702398	2.05105	0.0464636	0.635614
Ttc9b;S114	Q9D6E4;S114	0.649781	0.161222	2.07487	0.044093	0.635614
Vps13c;T1397	Q8BX70;T1397	0.691961	1.9635	2.0457	0.0470112	0.635614
Zc3h14;S515	Q8BJ05;S515	0.637002	-0.0243168	2.05609	0.0459535	0.635614
Zranb2;S153	Q9R020;S153	-0.531228	1.05806	-2.04452	0.0471331	0.635614
Cmtr1;S27	Q9DBC3;S27	1.20131	1.52764	2.04167	0.0474279	0.636163
Pak4;T207	Q8BTW9;T207	0.593524	-1.33741	2.04091	0.0475068	0.636163
Opalin;S84	Q7M750;S84	1.08168	2.80129	2.03994	0.0476076	0.636316
Abcf1;S107	Q6P542;S107	-0.616262	0.765052	-2.03655	0.0479611	0.636847
Clvs1;S329	Q9D4C9;S329	-0.62142	0.873276	-2.03835	0.0477732	0.636847
Sos1;S1120	Q62245;S1120	0.550375	-1.25215	2.0374	0.0478717	0.636847
Znrf2;S141	Q71FD5;S141	-0.860807	-1.21758	-2.03613	0.0480049	0.636847
Epb41l1;S648	Q9Z2H5;S648	-1.63776	3.6044	-2.03045	0.0486027	0.637025
Fxyd1;S82	Q9Z239;S82	3.0588	1.53432	2.03389	0.0482397	0.637025
Map1a;S2637	Q9QYR6;S2637	0.784623	2.11216	2.02912	0.0487444	0.637025
Nr2c2;T352	P49117;T352	0.470856	-2.7483	2.03506	0.0481169	0.637025
Shank3;S781	Q4ACU6;S781	0.461719	-0.184448	2.03125	0.0485179	0.637025
Soga1;S1015	E1U8D0;S1015	0.657154	-1.50074	2.02802	0.0488609	0.637025
Sorbs1;S254	Q62417;S254	1.04559	-2.10112	2.02754	0.0489125	0.637025
Srpk1;S450	O70551;S450	-0.574469	-1.25265	-2.03088	0.0485571	0.637025
Srrm2;S1996	Q8BTI8;S1996	-0.672426	1.33682	-2.02895	0.0487618	0.637025
Zc3hc1;S353	Q80YV2;S353	0.844845	0.998426	2.03256	0.0483802	0.637025
Aaas;S495	P58742;S495	-0.488847	-1.24051	-2.02496	0.0491872	0.637109
Jcad;S980	Q5DTX6;S980	-0.645381	-1.18814	-2.02533	0.0491479	0.637109
Psd3;S1001	Q2PFD7;S1001	-0.749791	3.50172	-2.02605	0.0490714	0.637109
Atp1a3;S712	Q6PIC6;S712	-0.439191	0.429506	-2.01944	0.0497808	0.637334
Elfn2;S671	Q68FM6;S671	0.514024	0.251783	2.01587	0.0501681	0.637334
Fam122a;S144	Q9DB52;S144	0.6448	-2.0102	2.02323	0.0493725	0.637334
Fbxl20;T417	Q9CZV8;T417	0.884062	-0.306326	2.01849	0.0498844	0.637334
Gpr162;S542	Q3UN16;S542	-0.652803	-0.74555	-2.02186	0.0495196	0.637334
Map1s;S569	Q8C052;S569	-0.846172	0.656945	-2.01756	0.0499843	0.637334
Mark2;S616	Q05512;S616	0.832744	2.09606	2.02061	0.0496547	0.637334
Mark3;S400	Q03141;S400	-1.07125	-0.838372	-2.02097	0.0496164	0.637334
Ndn;S88	P25233;S88	0.649311	-1.21957	2.01682	0.0500656	0.637334
Pclo;S1332	Q9QYX7;S1332	-0.981689	-0.549987	-2.01568	0.0501887	0.637334
Rplp0;S304	P14869;S304	-1.78212	0.145615	-2.01635	0.0501166	0.637334
Srrt;S4	Q99MR6;S4	-0.735853	0.657916	-2.01157	0.050638	0.641895
Cpne5;S583	Q8JZW4;S583	-0.7245	2.75696	-2.00849	0.0509778	0.643911
Numa1;S167	E9Q7G0;S167	0.641661	-0.874778	2.00872	0.0509524	0.643911
Nedd4l;S516	Q8CFI0;S516	-0.675912	-0.245392	-2.00596	0.0512567	0.646174
Srcin1;T704	Q9QWI6;T704	0.835182	0.673302	2.00523	0.0513383	0.646174
Aak1;S21	Q3UHJ0;S21	0.853944	1.37486	2.00115	0.0517928	0.649598
Lppr4;S685	Q7TME0;S685	-0.551816	-1.52832	-2.00158	0.0517449	0.649598
Marf1;S1081	Q8BJ34;S1081	0.693879	-1.62849	1.99985	0.0519389	0.650285
Cend1;S89	Q9JKC6;S89	2.05872	5.8584	1.99792	0.0521557	0.650713
Wipf3;T357	P0C7L0;T357	0.62523	-1.1157	1.99832	0.0521106	0.650713
Prrt2;T72	E9PUL5;T72	1.3456	0.0544658	1.99677	0.0522849	0.651184
Rtn4;S489	Q99P72;S489	-1.78369	0.221819	-1.99446	0.0525465	0.653301
Mapt;S554	P10637;S554	-1.37216	1.19785	-1.99058	0.0529878	0.657639
Mon1a;S56	Q6PDG8;S56	-0.420319	-1.42619	-1.98935	0.0531277	0.658229
Aak1;T460	Q3UHJ0;T460	1.02747	1.2663	1.90545	0.0635058	0.658929
Abi1;S216	Q8CBW3;S216	1.20179	-1.06064	1.85894	0.0699733	0.658929
Abi1;S222	Q8CBW3;S222	-1.74822	-3.87836	-1.96965	0.0554232	0.658929
Ablim1;S475	Q8K4G5;S475	0.452898	3.55476	1.87153	0.0681704	0.658929
Ablim2;S334	Q8BL65;S334	0.574352	-0.490078	1.92731	0.0606475	0.658929
Acap2;S521	Q6ZQK5;S521	1.02309	-0.340782	1.87307	0.0679524	0.658929
Actb;T249	P63260;T249	-0.919543	-1.89889	-1.96003	0.0565746	0.658929
Add1;S436	Q9QYC0;S436	0.459601	4.13813	1.951	0.057675	0.658929
Add3;S414	Q9QYB5;S414	1.06529	-0.968126	1.8463	0.0718253	0.658929
Add3;S681	Q9QYB5;S681	0.748409	4.89624	1.86764	0.0687227	0.658929
Agap2;T629	Q3UHD9;T629	0.842232	-2.15136	1.92841	0.0605062	0.658929
Akt3;S34	Q9WUA6;S34	0.525655	-2.77707	1.88524	0.0662512	0.658929
Ampd2;S87	Q9DBT5;S87	1.35806	0.320498	1.92958	0.0603568	0.658929
Ap3d1;S688	O54774;S688	-0.458279	0.429807	-1.88515	0.0662637	0.658929
Ap3d1;S754	O54774;S754	-1.83143	-0.474597	-1.97151	0.0552032	0.658929
Ap3d1;S784	O54774;S784	-1.03924	4.94862	-1.84847	0.0715039	0.658929
Arhgap44;S636	Q5SSM3;S636	0.536905	2.2387	1.85732	0.0702088	0.658929
Arhgef6;S679	Q8K4I3;S679	1.15948	-1.81041	1.87773	0.0672962	0.658929
Arhgef7;S497	Q9ES28;S497	0.733077	2.15865	1.84548	0.0719476	0.658929
Arhgef7;S573	Q9ES28;S573	0.676311	-0.337213	1.91412	0.0623584	0.658929
Asap1;S1062	Q9QWY8;S1062	-1.02719	-2.47513	-1.91006	0.0628936	0.658929
Asap1;S1146	Q9QWY8;S1146	-1.04472	-2.06093	-1.87623	0.0675068	0.658929
Asap1;S741	Q9QWY8;S741	-0.867153	-0.709156	-1.94553	0.05835	0.658929
Asap1;S854	Q9QWY8;S854	0.656042	-0.169478	1.88917	0.065709	0.658929
Atat1;S315	Q8K341;S315	0.830812	-1.51984	1.84757	0.0716372	0.658929
Atp1a3;S442	Q6PIC6;S442	1.11083	-2.50893	1.86742	0.0687543	0.658929
Atp1a3;Y532	Q6PIC6;Y532	-0.516881	-1.88099	-1.8401	0.0727481	0.658929
Atp5b;S231	P56480;S231	-0.354283	-1.378	-1.87547	0.0676133	0.658929
Atp8a1;T28	P70704;T28	-0.794749	0.249371	-1.84583	0.0718956	0.658929
Basp1;S40	Q91XV3;S40	-0.56188	4.73072	-1.98478	0.0536532	0.658929
Bcas1;S425	Q80YN3;S425	0.630766	0.583508	1.87748	0.0673312	0.658929
Bin1;S304	O08539;S304	-0.679207	2.90457	-1.8719	0.0681181	0.658929
Bin1;S332	O08539;S332	0.927027	0.944634	1.94602	0.058289	0.658929
Bnip3l;S119	Q9Z2F7;S119	0.714275	-0.413087	1.93236	0.060003	0.658929
C2cd2l;S426	Q80X80;S426	-0.741991	-0.946604	-1.87554	0.0676041	0.658929
Cacna1a;S752	P97445;S752	-0.702915	-1.10984	-1.83965	0.0728163	0.658929
Cacna1b;S2188	O55017;S2188	0.702623	-0.250326	1.89932	0.0643286	0.658929
Cacna1b;S783	O55017;S783	0.555081	0.913034	1.85587	0.0704197	0.658929
Cadps;S88	Q80TJ1;S88	1.09468	2.25421	1.87617	0.0675152	0.658929
Camk2b;S367	P28652;S367	0.939169	2.54946	1.96463	0.056022	0.658929
Camkk1;S492	Q8VBY2;S492	0.524873	0.803609	1.87014	0.068367	0.658929
Camlg;S55	P49070;S55	-1.79606	0.941577	-1.92917	0.0604097	0.658929
Camsap2;S836	Q8C1B1;S836	0.417789	-0.357208	1.93121	0.0601495	0.658929
Capg;S341	P24452;S341	1.1406	-1.14466	1.91888	0.0617363	0.658929
Cask;S319	O70589;S319	-0.676594	-1.72848	-1.94299	0.0586659	0.658929
Caskin1;S821	Q6P9K8;S821	0.4792	1.29687	1.97416	0.0548904	0.658929
Ccdc93;S305	Q7TQK5;S305	0.660206	0.620167	1.90079	0.0641302	0.658929
Ccz1;S264	Q8C1Y8;S264	0.569703	1.22119	1.84753	0.0716431	0.658929
Cdc16;S560	Q8R349;S560	-0.555552	-1.94504	-1.86994	0.0683949	0.658929
Cdc42bpb;S1692	Q7TT50;S1692	-0.902239	1.07936	-1.88035	0.0669305	0.658929
Cdh10;S784	P70408;S784	-0.710854	-0.0244266	-1.84897	0.0714309	0.658929
Cdk16;S138	Q04735;S138	0.638208	-0.763573	1.94074	0.0589467	0.658929
Cep170b;S1029	Q80U49;S1029	-0.54347	-0.702377	-1.84559	0.0719312	0.658929
Cep170b;T338	Q80U49;T338	-0.564066	0.525351	-1.90392	0.063711	0.658929
Chgb;S342	P16014;S342	-0.878976	3.87644	-1.93669	0.0594546	0.658929
Chka;S71	O54804;S71	-0.511631	-2.04809	-1.86767	0.0687191	0.658929
Cit;S479	P49025;S479	-0.590873	-1.18936	-1.94192	0.0587987	0.658929
Clasp1;S1193	Q80TV8;S1193	0.45788	0.85542	1.84535	0.0719668	0.658929
Clint1;S307	Q99KN9;S307	0.743478	3.13822	1.90542	0.0635095	0.658929
Clip2;S295	Q9Z0H8;S295	0.404114	1.2029	1.88945	0.0656715	0.658929
Cpne5;S575	Q8JZW4;S575	-0.70189	2.76101	-1.95972	0.0566121	0.658929
Cpne5;S579	Q8JZW4;S579	-0.745863	2.70099	-1.91927	0.0616857	0.658929
Crocc;S1479	Q8CJ40;S1479	-0.59504	-2.71272	-1.84549	0.0719449	0.658929
Dact3;S10	Q0PHV7;S10	-1.02201	-2.00551	-1.84715	0.0717002	0.658929
Dlg5;T984	E9Q9R9;T984	0.80058	-2.71143	1.92688	0.0607027	0.658929
Dlgap1;S362	Q9D415;S362	-0.882476	-0.48802	-1.83858	0.0729772	0.658929
Dlgap3;S753	Q6PFD5;S753	0.696242	1.89969	1.96091	0.0564689	0.658929
Dtx3l;S9	Q3UIR3;S9	0.723575	-2.86654	1.91905	0.061714	0.658929
Eif3b;S75	Q8JZQ9;S75	-1.58815	2.9944	-1.93755	0.0593461	0.658929
Elfn2;T493	Q68FM6;T493	0.523569	0.727129	1.91841	0.0617979	0.658929
Enah;S738	Q03173;S738	-0.737089	-0.212366	-1.93798	0.0592924	0.658929
Enah;T696	Q03173;T696	-1.08027	2.42738	-1.96823	0.0555922	0.658929
Epb41l1;T652	Q9Z2H5;T652	-1.05752	-0.117921	-1.87552	0.0676068	0.658929
Epb41l2;S116	O70318;S116	0.536497	-0.50878	1.92821	0.0605319	0.658929
Fam134c;S258	Q9CQV4;S258	-0.644861	-1.65602	-1.84217	0.0724386	0.658929
Fam171a2;S475	A2A699;S475	0.514675	1.03157	1.94263	0.0587106	0.658929
Fam53c;S122	Q8BXQ8;S122	-0.618498	-2.55996	-1.96973	0.0554135	0.658929
Fbxo42;S552	Q6PDJ6;S552	0.894459	-1.96215	1.88281	0.0665878	0.658929
Gab1;S266	Q9QYY0;S266	-0.658502	-1.73438	-1.9329	0.0599344	0.658929
Gabbr2;S892	Q80T41;S892	-1.28744	1.70755	-1.88135	0.0667907	0.658929
Gpsm1;S543	Q6IR34;S543	-0.615981	-1.75543	-1.89869	0.0644127	0.658929
Grin2a;S1291	P35436;S1291	-0.757951	3.0962	-1.90843	0.0631097	0.658929
Grin2a;S1459	P35436;S1459	0.693499	1.26643	1.84223	0.0724306	0.658929
Gsk3b;S389	Q9WV60;S389	0.497487	1.93341	1.86931	0.0684858	0.658929
Hcn1;T39	O88704;T39	-1.43281	1.90195	-1.94613	0.0582757	0.658929
Hdgfrp2;S366	Q3UMU9;S366	-0.861549	-0.947161	-1.87735	0.0673499	0.658929
Hnrnpd;S80	Q60668;S80	-1.24689	-0.946831	-1.8988	0.0643989	0.658929
Htr2a;S298	P35363;S298	-0.933225	-2.09615	-1.96434	0.0560558	0.658929
Ildr2;S584	B5TVM2;S584	-0.957757	-0.883018	-1.93561	0.0595914	0.658929
Inpp5j;S325	P59644;S325	-0.611048	-1.32318	-1.95108	0.0576645	0.658929
Iqsec1;S362	Q8R0S2;S362	-0.967065	0.410809	-1.85028	0.0712375	0.658929
Iqsec2;S402	Q5DU25;S402	0.73459	3.4942	1.87012	0.0683701	0.658929
Irf2bpl;S195	Q8K3X4;S195	0.854312	0.44074	1.8768	0.0674265	0.658929
Itpka;S185	Q8R071;S185	0.869763	-0.0955854	1.84705	0.0717146	0.658929
Jph3;S440	Q9ET77;S440	-0.93081	-1.75391	-1.94841	0.0579935	0.658929
Kcnab2;S20	P62482;S20	0.605038	1.23511	1.97957	0.0542568	0.658929
Kcnb1;S611	Q03717;S611	0.601687	-2.13256	1.90611	0.0634177	0.658929
Kcnma1;T1061	Q08460;T1061	0.90495	1.64566	1.95544	0.0571317	0.658929
Kctd16;T369	Q5DTY9;T369	-0.435591	0.498844	-1.8488	0.0714563	0.658929
Khsrp;S481	Q3U0V1;S481	0.632097	-1.35766	1.91343	0.0624499	0.658929
Kiaa1109;S1361	A2AAE1;S1361	0.551795	-2.61995	1.96401	0.0560954	0.658929
Kif1a;S1342	P33173;S1342	0.710323	-0.168345	1.88085	0.0668608	0.658929
Ksr1;T411	Q61097;T411	0.480907	1.72808	1.86408	0.0692322	0.658929
Lrrc7;S904	Q80TE7;S904	0.515847	-2.40996	1.89848	0.0644414	0.658929
Luzp1;S660	Q8R4U7;S660	-0.867282	0.0100369	-1.90054	0.0641644	0.658929
Map1a;S1789	Q9QYR6;S1789	0.765333	6.28176	1.85129	0.0710897	0.658929
Map1b;S1204	P14873;S1204	0.554064	2.63765	1.87183	0.0681279	0.658929
Map2;S364	P20357;S364	-0.710117	-1.24276	-1.88842	0.0658118	0.658929
Map4k4;S795	P97820;S795	0.783457	-0.494659	1.96723	0.0557112	0.658929
Map4k5;S335	Q8BPM2;S335	0.668732	-1.27198	1.94072	0.0589491	0.658929
Map7d1;S552	A2AJI0;S552	-0.840519	0.888517	-1.93427	0.0597606	0.658929
Map9;S160	Q3TRR0;S160	0.41487	3.37078	1.90668	0.063342	0.658929
Marcksl1;S104	P28667;S104	0.43979	4.95602	1.89034	0.0655488	0.658929
Marcksl1;S22	P28667;S22	-0.451205	3.22984	-1.97768	0.0544774	0.658929
Marcksl1;S93	P28667;S93	0.515982	2.94958	1.8768	0.0674265	0.658929
Mark4;S423	Q8CIP4;S423	0.713022	1.38951	1.93092	0.0601862	0.658929
Matr3;S164	Q8K310;S164	0.658117	-0.147975	1.86253	0.0694557	0.658929
Med22;S173	Q62276;S173	0.631069	-0.394953	1.8942	0.0650211	0.658929
Mief1;S55	Q8BGV8;S55	-0.410708	-1.14456	-1.96121	0.0564325	0.658929
Mllt4;S1173	Q9QZQ1;S1173	0.614947	0.485301	1.97546	0.0547371	0.658929
Mprip;S976	P97434;S976	0.779916	0.711312	1.92347	0.0611409	0.658929
Mta1;S576	Q8K4B0;S576	0.568973	-2.49099	1.86123	0.0696425	0.658929
Mtdh;S565	Q80WJ7;S565	0.61982	-0.25164	1.92707	0.060678	0.658929
Nbea;S1707	Q9EPN1;S1707	1.05481	0.167584	1.84244	0.0723986	0.658929
Ncoa3;S847	O09000;S847	0.537089	-2.51429	1.86119	0.0696482	0.658929
Ndrg2;T334	Q9QYG0;T334	1.38822	1.06128	1.98402	0.0537411	0.658929
Nedd4l;S332	Q8CFI0;S332	0.510395	0.337196	1.92557	0.0608704	0.658929
Nedd4l;S493	Q8CFI0;S493	1.6264	-0.0782245	1.86358	0.069305	0.658929
Nedd4l;T331	Q8CFI0;T331	0.564216	0.300813	1.95806	0.0568137	0.658929
Nefh;S637	P19246;S637	-1.07996	1.17484	-1.96239	0.0562899	0.658929
Nefh;S751	P19246;S751	-0.845678	0.998335	-1.8554	0.0704876	0.658929
Nefl;S13	P08551;S13	-0.91642	-2.62687	-1.8759	0.0675534	0.658929
Nefm;S610	P08553;S610	0.747913	6.83446	1.84142	0.0725513	0.658929
Nek1;S618	P51954;S618	0.595526	-1.67451	1.95711	0.0569281	0.658929
Nfia;S323	Q02780;S323	1.37695	0.383249	1.96788	0.0556333	0.658929
Nup210;S1852	Q9QY81;S1852	0.671559	-0.853151	1.87992	0.0669895	0.658929
Pclo;S1292	Q9QYX7;S1292	-1.0695	1.304	-1.83796	0.0730704	0.658929
Pclo;T1571	Q9QYX7;T1571	0.865833	-0.733679	1.86466	0.0691492	0.658929
Pde4a;S333	O89084;S333	1.01887	1.14416	1.86129	0.0696337	0.658929
Phactr4;S118	Q501J7;S118	0.638405	-0.297498	1.94333	0.0586228	0.658929
Phldb1;T524	Q6PDH0;T524	0.514622	-1.51961	1.87068	0.0682905	0.658929
Pip5k1c;T661	O70161;T661	-0.935957	0.13263	-1.86913	0.0685106	0.658929
Pkp4;S246	Q68FH0;S246	-1.04498	0.689789	-1.9378	0.0593145	0.658929
Plcd1;S460	Q8R3B1;S460	-0.761751	-1.01459	-1.90027	0.0642004	0.658929
Plch2;S660	A2AP18;S660	0.865061	0.0357075	1.88467	0.0663291	0.658929
Plcl2;S72	Q8K394;S72	0.492511	-0.105855	1.83852	0.0729853	0.658929
Plekha2;S184	Q9ERS5;S184	0.623584	-1.17151	1.85074	0.0711707	0.658929
Pml;S17	Q60953;S17	0.752609	-0.305801	1.97302	0.0550242	0.658929
Ppp1r16a;S379	Q923M0;S379	0.616735	0.70895	1.94821	0.0580178	0.658929
Prickle2;S696	Q80Y24;S696	0.522785	2.63663	1.84251	0.0723884	0.658929
Prkar1a;S77	Q9DBC7;S77	0.669989	1.91147	1.91568	0.0621542	0.658929
Prkar2a;S78	P12367;S78	-1.52791	-0.144761	-1.91364	0.0624215	0.658929
Prkar2b;S85	P31324;S85	-0.913661	1.31072	-1.965	0.0559768	0.658929
Prkg2;S110	Q61410;S110	-0.944951	-0.80199	-1.87597	0.067544	0.658929
Prox1;S220	P48437;S220	0.619903	-0.291239	1.91854	0.06178	0.658929
Prpf4b;S366	Q61136;S366	-0.815848	-0.535446	-1.95387	0.0573229	0.658929
Prrt3;S857	Q6PE13;S857	0.688593	-1.82043	1.94927	0.057887	0.658929
Psd;S993	Q5DTT2;S993	-0.643374	-0.259627	-1.93449	0.0597322	0.658929
Psd3;S1003	Q2PFD7;S1003	-0.758846	3.55952	-1.92968	0.0603435	0.658929
Rab3a;S190	P63011;S190	0.807098	1.44459	1.87778	0.067289	0.658929
Ralbp1;S34	Q62172;S34	-0.441012	-0.152496	-1.90944	0.0629757	0.658929
Rapgef2;S1158	Q8CHG7;S1158	0.909739	0.756114	1.95491	0.0571965	0.658929
Raver1;S14	Q9CW46;S14	0.897606	2.05585	1.86394	0.0692519	0.658929
Rbbp6;S1329	P97868;S1329	-0.543168	-1.99564	-1.90848	0.0631025	0.658929
Rbm39;S136	Q8VH51;S136	0.390123	4.58875	1.94708	0.0581576	0.658929
Rcan1;S161	Q9JHG6;S161	-0.718044	-0.140926	-1.87425	0.067786	0.658929
Reps1;S482	O54916;S482	0.839065	-0.274834	1.89556	0.0648363	0.658929
Reps2;S32	Q80XA6;S32	0.660232	-1.94917	1.98728	0.0533648	0.658929
Rnf20;S138	Q5DTM8;S138	-0.788106	-0.679838	-1.98535	0.0535879	0.658929
Rph3a;S680	P47708;S680	-0.434994	3.01972	-1.84326	0.0722762	0.658929
Rps6ka3;S369	P18654;S369	0.558281	-1.26974	1.93182	0.0600711	0.658929
Rtn3;S219	Q9ES97;S219	-1.19386	0.173827	-1.93681	0.0594391	0.658929
Rtn3;S230	Q9ES97;S230	-1.26512	2.75011	-1.8869	0.0660221	0.658929
Rtn4;S16	Q99P72;S16	1.9778	3.71162	1.87257	0.0680231	0.658929
Scg3;S40	P47867;S40	0.986299	-1.43062	1.845	0.0720188	0.658929
Scn2a1;S558	B1AWN6;S558	1.05625	-0.755039	1.91858	0.0617751	0.658929
Scn8a;S504	Q9WTU3;S504	-0.730973	-0.873341	-1.88597	0.0661494	0.658929
Sec16a;S1028	E9QAT4;S1028	0.626775	-0.502889	1.9364	0.0594913	0.658929
Sgpp1;S101	Q9JI99;S101	0.482749	1.68445	1.87987	0.0669973	0.658929
Sh3kbp1;S555	Q8R550;S555	1.01331	0.386781	1.98129	0.054057	0.658929
Shank1;S638	D3YZU1;S638	-0.766179	-0.610029	-1.84739	0.0716635	0.658929
Shank2;T485	Q80Z38;T485	0.74638	-2.73442	1.96827	0.0555871	0.658929
Slc16a1;S210	P53986;S210	-1.04629	1.2488	-1.89898	0.0643744	0.658929
Slc1a3;S512	P56564;S512	0.995898	3.67181	1.84476	0.0720539	0.658929
Slc6a15;S675	Q8BG16;S675	0.702053	1.25577	1.98099	0.0540915	0.658929
Smn1;S25	P97801;S25	-0.650057	-3.39639	-1.98555	0.0535647	0.658929
Sorbs2;S633	Q3UTJ2;S633	-0.709425	-1.86434	-1.86084	0.0696989	0.658929
Speg;S2413	Q62407;S2413	0.559297	-0.805769	1.95221	0.0575262	0.658929
Sptan1;S1186	P16546;S1186	-0.456683	0.487188	-1.90965	0.0629478	0.658929
Srcin1;S47	Q9QWI6;S47	-0.929568	1.66686	-1.87784	0.0672802	0.658929
Srrm1;S915	Q52KI8;S915	-0.566433	1.45062	-1.92642	0.0607609	0.658929
Srrm2;S1230	Q8BTI8;S1230	-0.810832	0.215884	-1.92123	0.0614312	0.658929
Srrm2;S1278	Q8BTI8;S1278	0.578808	-0.0893671	1.84937	0.0713714	0.658929
Srrm2;S1360	Q8BTI8;S1360	0.448566	2.38044	1.94111	0.0588994	0.658929
Stmn1;S25	P54227;S25	1.07143	0.969856	1.89624	0.0647447	0.658929
Stx7;T41	O70439;T41	0.936074	1.51977	1.96642	0.0558079	0.658929
Sv2a;S393	Q9JIS5;S393	0.457075	1.89306	1.93756	0.0593448	0.658929
Syap1;T262	Q9D5V6;T262	0.672553	2.19224	1.88545	0.066222	0.658929
Syn1;S341	O88935;S341	0.873693	-0.858797	1.84077	0.0726484	0.658929
Tmcc3;S216	Q8R310;S216	0.612036	-0.283006	1.91375	0.0624076	0.658929
Tmpo;T74	Q61029;T74	0.610121	1.48085	1.8796	0.0670346	0.658929
Tnik;S659	P83510;S659	-0.871159	0.260968	-1.88838	0.0658178	0.658929
Tom1;S462	O88746;S462	0.454681	1.69038	1.93269	0.0599609	0.658929
Tomm22;S15	Q9CPQ3;S15	-0.516612	1.48485	-1.91049	0.0628369	0.658929
Tppp;S34	Q7TQD2;S34	-1.50404	3.42628	-1.92847	0.0604987	0.658929
Tprg1l;T13	Q9DBS2;T13	-1.3134	0.837785	-1.90451	0.0636319	0.658929
Tubb4b;Y340	P68372;Y340	0.521856	-2.54209	1.94093	0.0589221	0.658929
Tubb5;S75	Q7TMM9;S75	-1.07063	-2.14041	-1.90122	0.0640721	0.658929
Unc13a;S241	Q4KUS2;S241	1.00315	-1.67845	1.84202	0.0724612	0.658929
Unc5c;S693	O08747;S693	0.492018	-0.790791	1.90375	0.0637331	0.658929
Usp39;S46	Q3TIX9;S46	-1.35225	-2.28466	-1.85032	0.0712317	0.658929
Usp39;S81	Q3TIX9;S81	-0.571717	0.292241	-1.98361	0.0537877	0.658929
Wipf3;S211	P0C7L0;S211	0.538672	3.35859	1.90916	0.0630127	0.658929
Zc2hc1a;T243	Q8BJH1;T243	-0.637156	-0.0680831	-1.95132	0.0576348	0.658929
Zc3h13;S198	E9Q784;S198	-0.648827	-1.4921	-1.92793	0.0605679	0.658929
Iws1;S321	Q8C1D8;S321	-0.825742	-0.615005	-1.83725	0.0731761	0.659047
Pclo;S3545	Q9QYX7;S3545	0.416051	1.87064	1.83629	0.0733212	0.659521
Arhgap23;S351	Q69ZH9;S351	-1.28903	0.250712	-1.83437	0.0736117	0.660063
Camkv;T470	Q3UHL1;T470	0.473673	2.12949	1.83375	0.0737055	0.660063
Hdgfrp2;S367	Q3UMU9;S367	-0.849931	-0.960822	-1.831	0.0741227	0.660063
Mapre3;S162	Q6PER3;S162	0.951294	3.87777	1.83181	0.0739997	0.660063
Sgip1;S169	Q8VD37;S169	0.414914	5.45755	1.83102	0.0741194	0.660063
Sipa1l2;S1488	Q80TE4;S1488	-0.493187	-0.553507	-1.83115	0.0740987	0.660063
Stx7;T79	O70439;T79	0.914005	2.87308	1.83393	0.0736772	0.660063
Syn1;S9	O88935;S9	-0.850294	4.96925	-1.83179	0.0740024	0.660063
Add1;T358	Q9QYC0;T358	-1.20166	3.59113	-1.80805	0.0776841	0.660366
Add2;S11	Q9QYB8;S11	0.826085	5.57859	1.80398	0.07833	0.660366
Ank2;S1936	Q8C8R3;S1936	-0.972109	0.454069	-1.81177	0.0770968	0.660366
Ap3d1;S825	O54774;S825	0.397997	5.46523	1.80103	0.0788018	0.660366
Aqp4;S285	P55088;S285	0.607325	6.4217	1.81962	0.075871	0.660366
Arfgap2;S239	Q99K28;S239	0.636221	0.967061	1.82926	0.0743871	0.660366
Arfgef2;S227	A2A5R2;S227	0.359182	3.16409	1.82523	0.075005	0.660366
Arhgap5;S1217	P97393;S1217	-0.528915	0.96584	-1.79318	0.0800669	0.660366
Arhgef7;S228	Q9ES28;S228	-1.19858	2.87534	-1.79972	0.0790121	0.660366
Atp8a2;S1110	P98200;S1110	0.657335	-0.10642	1.8091	0.0775183	0.660366
Bin1;S298	O08539;S298	-0.285237	5.27363	-1.79616	0.0795844	0.660366
Cacna1b;S2221	O55017;S2221	0.380497	2.15292	1.80342	0.0784192	0.660366
Camk2a;T337	P11798;T337	-0.809069	4.33941	-1.82601	0.0748846	0.660366
Ccdc27;S137	Q3V036;S137	-0.611254	0.926604	-1.80597	0.0780134	0.660366
Coil;S171	Q5SU73;S171	-0.728593	-1.28368	-1.81189	0.0770778	0.660366
Dgkb;S791	Q6NS52;S791	0.59636	-2.55349	1.80694	0.0778596	0.660366
Dmtn;T274	Q9WV69;T274	0.588569	1.56315	1.80116	0.0787813	0.660366
Dock4;S1933	P59764;S1933	0.706175	-0.764448	1.79768	0.0793398	0.660366
Enah;T315	Q03173;T315	-0.539069	-1.60938	-1.80069	0.0788563	0.660366
Epb41l1;S541	Q9Z2H5;S541	-0.911411	1.79602	-1.7931	0.0800808	0.660366
Epb41l3;T495	Q9WV92;T495	0.361939	4.06588	1.79473	0.0798166	0.660366
Fam171a2;S445	A2A699;S445	1.14403	-0.0137775	1.80158	0.0787139	0.660366
Fam21;T322	Q6PGL7;T322	-0.500352	-1.214	-1.82203	0.0754974	0.660366
Fry;S1383	E9Q8I9;S1383	0.916213	-0.887271	1.82675	0.0747717	0.660366
Gnl1;S51	P36916;S51	-0.671443	2.21495	-1.81724	0.07624	0.660366
Grin2a;S948	P35436;S948	-0.515178	-2.15945	-1.80357	0.0783957	0.660366
Gtpbp1;S47	O08582;S47	-0.785475	0.274572	-1.8064	0.0779456	0.660366
Hist1h1b;S2	P43276;S2	0.711977	0.0717342	1.81619	0.076405	0.660366
Jph1;T161	Q9ET80;T161	0.708813	-0.745102	1.79868	0.0791793	0.660366
Lrrc4b;S700	P0C192;S700	0.812204	2.12014	1.80024	0.0789283	0.660366
Map1a;T893	Q9QYR6;T893	-1.89489	-0.785723	-1.8073	0.0778024	0.660366
Map1b;S1151	P14873;S1151	0.890668	3.75315	1.80727	0.0778064	0.660366
Map1s;S577	Q8C052;S577	-0.954092	0.413316	-1.79802	0.0792856	0.660366
Map2;S140	P20357;S140	-1.39194	4.30541	-1.82434	0.0751405	0.660366
Map7;S164	O88735;S164	0.504307	0.852003	1.80779	0.0777245	0.660366
Mical3;S1187	Q8CJ19;S1187	-0.800212	1.0643	-1.81297	0.0769087	0.660366
Mllt4;S1454	Q9QZQ1;S1454	0.81864	0.392084	1.80832	0.0776403	0.660366
Nefh;S679	P19246;S679	-0.615213	0.883048	-1.80159	0.0787115	0.660366
Nsfl1c;T73	Q9CZ44;T73	0.707816	-0.205626	1.82681	0.0747612	0.660366
Nucks1;S58	Q80XU3;S58	-1.04187	-0.968929	-1.82612	0.0748681	0.660366
Pclo;S3514	Q9QYX7;S3514	-0.902047	0.857227	-1.80457	0.0782359	0.660366
Pde4d;S287	Q01063;S287	0.575512	-0.440985	1.79724	0.0794101	0.660366
Pdzd8;S532	B9EJ80;S532	0.541276	-1.21246	1.8095	0.0774538	0.660366
Plcl2;S18	Q8K394;S18	0.740321	-0.269455	1.81004	0.0773685	0.660366
Podxl2;S594	Q8CAE9;S594	-0.555483	-2.51716	-1.79321	0.0800618	0.660366
Psip1;S176	Q99JF8;S176	0.548796	1.76914	1.81159	0.0771255	0.660366
Rabl6;S483	Q5U3K5;S483	-0.988804	-1.24134	-1.79298	0.0800991	0.660366
Rbm17;S155	Q8JZX4;S155	-0.593408	1.39973	-1.80667	0.077902	0.660366
Scn2a1;S606	B1AWN6;S606	1.31568	0.5062	1.81301	0.0769013	0.660366
Sept5;S225	Q9Z2Q6;S225	-1.15173	6.70226	-1.8136	0.0768089	0.660366
Slc12a5;T1029	Q91V14;T1029	0.568797	-1.32598	1.81795	0.0761297	0.660366
Slc25a23;T71	Q6GQS1;T71	-0.909006	0.183759	-1.80697	0.077854	0.660366
Srgap2;S994	Q91Z67;S994	0.651294	0.498132	1.82	0.0758121	0.660366
Srrm2;S2351	Q8BTI8;S2351	0.723024	0.605696	1.81211	0.0770433	0.660366
Stx1b;S10	P61264;S10	-0.87262	0.0835942	-1.79554	0.0796848	0.660366
Stxbp5;S903	Q8K400;S903	1.15072	3.01208	1.80424	0.0782894	0.660366
Syn2;S108	Q64332;S108	-0.571966	-0.640504	-1.82011	0.0757952	0.660366
Synpo2;S895	Q91YE8;S895	0.842792	-2.10515	1.79682	0.079478	0.660366
Syt7;S61	Q9R0N7;S61	-0.505849	1.18556	-1.79807	0.0792774	0.660366
Taldo1;S237	Q93092;S237	0.660004	-0.131324	1.82358	0.0752589	0.660366
Tbc1d9b;T397	Q5SVR0;T397	0.737655	-2.15535	1.80541	0.0781029	0.660366
Tuba1b;S340	P05213;S340	-1.139	0.369669	-1.79247	0.080182	0.660366
Tubb2a;T312	Q7TMM9;T312	-0.789958	-3.01277	-1.79829	0.0792412	0.660366
Tubgcp3;S513	P58854;S513	-0.547222	-2.62276	-1.79306	0.0800874	0.660366
Ubxn6;S78	Q99PL6;S78	0.727146	0.520646	1.8085	0.0776116	0.660366
Abcf1;S138	Q6P542;S138	-0.691824	0.0503177	-1.78573	0.0812848	0.660529
Abl2;S632	Q4JIM5;S632	0.43642	-0.649993	1.71831	0.0930227	0.660529
Ablim1;T586	Q8K4G5;T586	0.57142	-0.142711	1.76735	0.0843551	0.660529
Abr;S57	Q5SSL4;S57	-0.703476	-2.69959	-1.72904	0.0910663	0.660529
Actr3;S418	Q99JY9;S418	0.690567	1.7409	1.7124	0.094117	0.660529
Akap12;S1645	Q9WTQ5;S1645	0.609331	0.713808	1.73933	0.0892202	0.660529
Ank2;S2475	Q8C8R3;S2475	0.820099	2.26489	1.72289	0.0921833	0.660529
Ank2;T3745	Q8C8R3;T3745	1.02579	3.86631	1.70606	0.0953005	0.660529
Ap3d1;S755	O54774;S755	-0.89219	1.23093	-1.77765	0.0826226	0.660529
Atad1;S322	Q9D5T0;S322	0.439699	2.94272	1.73758	0.0895329	0.660529
Atg2b;S1015	Q80XK6;S1015	-0.765445	-0.532489	-1.73305	0.0903436	0.660529
Atg4c;S451	Q811C2;S451	-0.627203	-4.15178	-1.74976	0.087382	0.660529
Atl1;S23	Q8BH66;S23	-0.769489	0.0747178	-1.71544	0.0935531	0.660529
Atp2a2;S661	O55143;S661	0.475431	-1.84634	1.7371	0.0896176	0.660529
Baiap2;S396	Q8BKX1;S396	0.701935	-3.62379	1.71043	0.094483	0.660529
Bcas3;S706	Q8CCN5;S706	0.530707	0.730129	1.78408	0.0815562	0.660529
Bckdha;S344	P50136;S344	0.583505	1.92643	1.7138	0.0938558	0.660529
Bsn;S2029	O88737;S2029	0.497216	1.59166	1.73301	0.0903511	0.660529
Bsn;S833	O88737;S833	-0.576485	-1.86635	-1.72702	0.0914312	0.660529
Bsn;Y2804	O88737;Y2804	0.834	-0.632372	1.72627	0.0915683	0.660529
Cacnb4;S50	Q8R0S4;S50	-0.422952	0.843369	-1.71471	0.0936875	0.660529
Cadps2;S61	Q8BYR5;S61	0.601962	0.902217	1.74615	0.0880158	0.660529
Camsap2;S818	Q8C1B1;S818	0.794445	-0.00458954	1.73803	0.0894523	0.660529
Camsap3;S812	Q80VC9;S812	0.453027	1.01615	1.77114	0.0837133	0.660529
Caskin1;S759	Q6P9K8;S759	-0.665781	-0.751814	-1.77044	0.0838316	0.660529
Caskin1;S776	Q6P9K8;S776	1.35654	1.64257	1.71025	0.0945173	0.660529
Ccdc132;S15	Q8CI71;S15	0.529078	1.10523	1.78038	0.0821681	0.660529
Ccdc132;S498	Q8CI71;S498	-0.453133	-1.06627	-1.75255	0.0868969	0.660529
Ccdc136;S50	Q3TVA9;S50	-1.02792	-1.56103	-1.72732	0.0913769	0.660529
Ccdc88a;S1417	Q5SNZ0;S1417	0.49325	-1.80781	1.72562	0.0916868	0.660529
Ccdc92;S194	Q8VDN4;S194	0.461727	0.723399	1.74768	0.0877459	0.660529
Cdc42bpb;S1695	Q7TT50;S1695	-0.779814	0.624875	-1.72812	0.0912323	0.660529
Cdkl5;S343	Q3UTQ8;S343	0.549465	-0.450013	1.71501	0.0936326	0.660529
Cep170;S1384	Q6A065;S1384	0.61322	1.44647	1.70311	0.0958555	0.660529
Cep170b;S1032	Q80U49;S1032	-0.629714	-0.390308	-1.72671	0.0914885	0.660529
Cep170b;S421	Q80U49;S421	0.478321	0.827513	1.76465	0.0848141	0.660529
Cep170b;T864	Q80U49;T864	0.993736	1.34469	1.76232	0.0852114	0.660529
Cflar;S465	O35732;S465	-0.700894	0.0362463	-1.7106	0.0944508	0.660529
Ckb;S199	Q04447;S199	0.657177	0.0297805	1.77752	0.0826436	0.660529
Clip3;S399	B9EHT4;S399	0.813787	0.109448	1.70476	0.0955444	0.660529
Cplx2;S93	P84086;S93	0.406195	4.66418	1.70646	0.0952254	0.660529
Crmp1;S540	P97427;S540	1.69695	1.51628	1.70477	0.0955442	0.660529
Dclk1;S352	Q9JLM8;S352	-1.12084	2.26861	-1.77091	0.083752	0.660529
Dclk1;S751	Q9JLM8;S751	-0.761827	-0.012677	-1.7813	0.0820151	0.660529
Dclk1;T209	Q9JLM8;T209	0.735293	-3.19363	1.73981	0.089135	0.660529
Dip2b;S99	Q3UH60;S99	0.662925	0.178189	1.79014	0.0805617	0.660529
Dlg4;S480	Q62108;S480	-0.753149	0.209255	-1.71537	0.0935662	0.660529
Dmxl2;S1144	Q8BPN8;S1144	-1.21969	-0.391613	-1.72899	0.0910741	0.660529
Dmxl2;S1152	Q8BPN8;S1152	-0.721576	-1.37111	-1.74806	0.0876793	0.660529
Dnajb2;S311	Q9QYI5;S311	-0.962385	1.34566	-1.76529	0.0847046	0.660529
Dnajc5;T11	P60904;T11	-0.889764	-2.98224	-1.77986	0.0822551	0.660529
Doc2b;S411	P70169;S411	-0.752206	-2.17811	-1.74089	0.0889441	0.660529
Dopey2;S679	Q3UHQ6;S679	0.935357	-2.90251	1.70254	0.095964	0.660529
Dos;S512	Q66L44;S512	0.825266	1.23624	1.76275	0.0851377	0.660529
Efnb2;T277	P52800;T277	0.527137	-1.47736	1.74264	0.0886334	0.660529
Elfn2;S451	Q68FM6;S451	0.562371	-0.780796	1.71973	0.0927619	0.660529
Epb41l1;T489	Q9Z2H5;T489	-0.836763	3.80898	-1.71232	0.0941318	0.660529
Epb41l2;S38	O70318;S38	0.434518	0.652426	1.78058	0.0821356	0.660529
Eps15l1;S607	Q60902;S607	-0.585473	-3.00709	-1.74398	0.0883972	0.660529
Fam13c;T125	Q9DBR2;T125	1.44681	-2.08743	1.75225	0.0869481	0.660529
Fam193a;S1151	Q8CGI1;S1151	0.554937	-2.51463	1.7381	0.0894402	0.660529
Fbxo42;T539	Q6PDJ6;T539	1.13261	-1.38968	1.77451	0.0831467	0.660529
Fgf12;S212	P61329;S212	0.458191	0.769234	1.70805	0.0949269	0.660529
Fmn2;S377	Q9JL04;S377	1.18247	-1.157	1.72207	0.092334	0.660529
Fmn2;S476	Q9JL04;S476	0.50593	-2.35145	1.7793	0.0823469	0.660529
G3bp1;S149	P97855;S149	-0.777912	0.810362	-1.72184	0.0923747	0.660529
Gipc3;S222	Q8R5M0;S222	0.548295	0.877453	1.7779	0.08258	0.660529
Gprc5b;S355	Q923Z0;S355	0.382301	-0.160676	1.78974	0.0806269	0.660529
Gprin1;T582	Q3UNH4;T582	0.619774	-1.17967	1.71004	0.0945558	0.660529
Habp4;S7	Q9JKS5;S7	0.794085	-1.03374	1.77496	0.0830711	0.660529
Hcn2;S750	O88703;S750	-1.08137	-0.143098	-1.71403	0.0938141	0.660529
Hnrnpdl;S122	Q9Z130;S122	-0.783249	-1.33615	-1.78455	0.0814786	0.660529
Hnrnph1;S104	O35737;S104	0.568771	3.98324	1.77504	0.0830587	0.660529
Hspa12b;S276	Q9CZJ2;S276	-0.572039	-1.85786	-1.70445	0.0956028	0.660529
Huwe1;T3930	Q7TMY8;T3930	-0.667304	-0.576444	-1.75725	0.0860824	0.660529
Igsf11;S378	P0C673;S378	0.597919	-0.782233	1.75482	0.0865024	0.660529
Ildr2;S511	B5TVM2;S511	0.589033	1.04519	1.76563	0.0846473	0.660529
Itsn1;S313	Q9Z0R4;S313	0.872736	-0.100636	1.71006	0.0945519	0.660529
Jph3;S675	Q9ET77;S675	0.580135	-1.0632	1.71686	0.0932914	0.660529
Jup;S665	Q02257;S665	-0.42448	-2.79263	-1.74055	0.0890048	0.660529
Kcnd2;S616	Q9Z0V2;S616	-1.42746	1.91447	-1.70404	0.0956802	0.660529
Lima1;S225	Q9ERG0;S225	0.619105	-0.0305717	1.70857	0.0948313	0.660529
Lpin2;S106	Q99PI5;S106	-0.580487	-2.19459	-1.70966	0.0946274	0.660529
Lrrc7;S1206	Q80TE7;S1206	0.67102	1.36214	1.71983	0.0927447	0.660529
Lysmd1;S3	Q9D0E3;S3	0.546067	-1.38469	1.74608	0.0880277	0.660529
Map1a;S460	Q9QYR6;S460	0.469558	2.65251	1.72668	0.0914938	0.660529
Map1s;S660	Q8C052;S660	1.2091	0.587284	1.74599	0.0880441	0.660529
Map2;S283	P20357;S283	0.924807	4.03421	1.7217	0.0924002	0.660529
Map2;S655	P20357;S655	-0.872352	1.30113	-1.7072	0.095086	0.660529
Map3k13;S680	Q1HKZ5;S680	0.421924	-0.334521	1.78573	0.081284	0.660529
Map4;S517	P27546;S517	0.544811	0.0696694	1.74455	0.0882965	0.660529
Map4k2;S394	Q61161;S394	-1.10979	-0.612972	-1.70614	0.0952858	0.660529
Map7d1;S282	A2AJI0;S282	0.617646	-1.67737	1.77698	0.0827344	0.660529
Mapt;S288	P10637;S288	0.667359	0.433457	1.71339	0.0939321	0.660529
Mapt;S648	P10637;S648	0.576579	0.0729155	1.77087	0.0837599	0.660529
Mdh1;S241	P14152;S241	-1.2062	1.11244	-1.71999	0.0927136	0.660529
Mgea5;S364	Q9EQQ9;S364	-0.685335	-1.60984	-1.73559	0.0898873	0.660529
Mief1;S94	Q8BGV8;S94	0.716002	-0.753308	1.74528	0.0881677	0.660529
Mpdz;S1066	Q8VBX6;S1066	0.492596	-1.26161	1.78742	0.0810072	0.660529
Mpp2;T117	Q9WV34;T117	-0.69333	3.12425	-1.78645	0.0811666	0.660529
Ncam1;S958	P13595;S958	0.438337	2.77694	1.71069	0.094435	0.660529
Ndrg2;S352	Q9QYG0;S352	-0.74345	-0.434143	-1.713	0.0940052	0.660529
Nefh;S500	P19246;S500	-1.25495	2.36078	-1.73297	0.0903565	0.660529
Nefh;S691	P19246;S691	-0.649327	-0.289577	-1.75024	0.0872991	0.660529
Nos1;S287	Q9Z0J4;S287	0.757936	0.158811	1.72003	0.092707	0.660529
Osbpl11;S194	Q8CI95;S194	0.668086	-0.307793	1.71207	0.0941768	0.660529
Pa2g4;S2	P50580;S2	-1.06467	0.475961	-1.70819	0.0949011	0.660529
Pak1;S223	O88643;S223	-0.461168	1.77638	-1.75334	0.0867591	0.660529
Pclo;S1553	Q9QYX7;S1553	-1.02494	0.769804	-1.7731	0.0833833	0.660529
Pclo;S212	Q9QYX7;S212	0.383972	2.32715	1.70254	0.0959628	0.660529
Pde1b;S7	Q01065;S7	-0.473166	-0.916919	-1.70412	0.0956648	0.660529
Pdlim4;S111	P70271;S111	0.711992	0.187774	1.77616	0.0828717	0.660529
Phf6;S155	Q9D4J7;S155	0.815116	0.735998	1.7448	0.0882535	0.660529
Pi4k2a;S51	Q2TBE6;S51	0.494712	1.36316	1.75527	0.0864253	0.660529
Ppm1h;S222	Q3UYC0;S222	0.779756	0.878851	1.76421	0.0848883	0.660529
Ppp1r3g;S156	Q9CW07;S156	-0.445507	-2.80936	-1.72471	0.0918507	0.660529
Ppp4r4;S805	Q8C0Y0;S805	-0.584766	-1.29031	-1.70323	0.0958337	0.660529
Prickle2;S732	Q80Y24;S732	0.627702	0.0210829	1.75597	0.0863038	0.660529
Prkab2;S183	Q6PAM0;S183	-0.993469	0.409224	-1.74713	0.0878428	0.660529
Prkag2;S90	Q91WG5;S90	0.462113	0.303565	1.74102	0.0889212	0.660529
Prkar2a;S74	P12367;S74	-1.51783	-0.257972	-1.79042	0.080517	0.660529
Prrt3;S917	Q6PE13;S917	-0.550546	-1.7044	-1.73789	0.089478	0.660529
Ptbp2;S308	Q91Z31;S308	-1.31171	1.85528	-1.73791	0.0894731	0.660529
Pura;T182	P42669;T182	1.39119	1.789	1.75336	0.0867557	0.660529
Rabep1;S410	O35551;S410	-0.558077	-1.39614	-1.74963	0.087406	0.660529
Ralgapa1;S796	Q6GYP7;S796	-0.720781	-1.61241	-1.76409	0.0849095	0.660529
Rap1gap2;S525	Q5SVL6;S525	0.567564	-0.573344	1.79148	0.0803438	0.660529
Rasgrf2;S633	P70392;S633	0.405403	1.02562	1.75048	0.0872565	0.660529
Rcan1;S165	Q9JHG6;S165	-0.754801	0.543209	-1.78408	0.0815568	0.660529
Rftn2;S404	Q8CHX7;S404	-0.693984	-2.05745	-1.70721	0.0950846	0.660529
Rims1;S1051	Q99NE5;S1051	1.16092	0.288932	1.76044	0.0855339	0.660529
Rims1;S211	Q99NE5;S211	-1.31891	1.84325	-1.77042	0.0838357	0.660529
Rims1;S716	Q99NE5;S716	1.03426	2.90348	1.75367	0.0867022	0.660529
Rps6ka2;S377	Q9WUT3;S377	-0.73305	-2.16278	-1.76435	0.0848647	0.660529
Rtn4;S857	Q99P72;S857	-0.448729	1.15141	-1.77706	0.0827208	0.660529
Scg5;S141	P12961;S141	0.877467	0.7878	1.77228	0.0835216	0.660529
Scg5;S205	P12961;S205	0.522086	1.52843	1.76236	0.085205	0.660529
Slc6a7;S616	Q6PGE7;S616	-0.756756	-0.875637	-1.70691	0.0951417	0.660529
Slc9a3r1;S275	P70441;S275	0.36882	5.25572	1.70511	0.0954784	0.660529
Slco2b1;S21	Q8BXB6;S21	0.648168	0.14202	1.7103	0.094507	0.660529
Smim13;S61	E9Q942;S61	-0.773854	0.189858	-1.73835	0.0893959	0.660529
Sobp;S627	Q0P5V2;S627	0.586804	-0.625979	1.78534	0.0813493	0.660529
Sort1;S819	Q6PHU5;S819	-0.974547	1.85266	-1.73611	0.0897948	0.660529
Sparcl1;S70	P70663;S70	-1.01023	0.427252	-1.76775	0.0842871	0.660529
Spatc1l;S269	Q9D9W0;S269	-0.587825	-3.04603	-1.77595	0.0829068	0.660529
Srgap3;S874	Q812A2;S874	1.3763	3.23842	1.72734	0.0913739	0.660529
Srrm2;S1151	Q8BTI8;S1151	0.398044	3.47747	1.75339	0.0867507	0.660529
Srrm2;S1229	Q8BTI8;S1229	-0.765442	0.178234	-1.73625	0.0897697	0.660529
Stim2;S719	P83093;S719	-0.720381	-0.694564	-1.71451	0.0937246	0.660529
Strn4;S223	P58404;S223	0.491552	0.332379	1.70349	0.0957848	0.660529
Strn4;S276	P58404;S276	-1.16554	0.115471	-1.72647	0.0915316	0.660529
Sv2b;T330	Q8BG39;T330	0.830349	-0.736257	1.71587	0.0934731	0.660529
Syap1;T255	Q9D5V6;T255	0.590853	-1.87138	1.7399	0.0891191	0.660529
Sybu;S557	Q8BHS8;S557	-0.381958	-2.81439	-1.72591	0.091634	0.660529
Syn1;S437	O88935;S437	2.18824	1.84467	1.78664	0.0811357	0.660529
Syn1;S438	O88935;S438	-1.13	2.76958	-1.7147	0.0936891	0.660529
Syngap1;S1027	F6SEU4;S1027	-1.1392	1.61746	-1.73884	0.0893082	0.660529
Syngap1;S752	F6SEU4;S752	0.686288	0.834296	1.7427	0.0886227	0.660529
Tbc1d10b;S664	Q8BHL3;S664	0.560493	0.905321	1.70299	0.0958796	0.660529
Tbc1d10b;T136	Q8BHL3;T136	0.670799	2.39561	1.77316	0.083374	0.660529
Tenm2;T346	Q9WTS5;T346	0.679583	-0.375991	1.78823	0.0808746	0.660529
Tjp1;S131	P39447;S131	-0.980356	1.8927	-1.72471	0.0918512	0.660529
Tjp2;S1136	Q9Z0U1;S1136	0.409831	2.6186	1.72008	0.0926979	0.660529
Trappc12;S309	Q8K2L8;S309	0.417387	0.733732	1.71473	0.0936847	0.660529
Tsc22d4;S189	Q9EQN3;S189	0.623775	-0.889596	1.73387	0.0901959	0.660529
Ube4b;S105	Q9ES00;S105	-0.78278	-1.17098	-1.77645	0.0828229	0.660529
Vgf;S156	Q0VGU4;S156	-2.0856	2.01674	-1.71976	0.0927563	0.660529
Wasf3;S223	Q8VHI6;S223	0.864612	0.314228	1.76217	0.085237	0.660529
Zdhhc5;S380	Q8VDZ4;S380	0.454185	0.398879	1.75893	0.0857924	0.660529
Zdhhc5;S423	Q8VDZ4;S423	-0.461945	-1.57376	-1.75265	0.0868784	0.660529
Add2;S614	Q9QYB8;S614	-0.836667	3.02002	-1.70144	0.0961721	0.661323
Agap2;S149	Q3UHD9;S149	1.03663	-1.6281	1.70068	0.0963162	0.661674
Hnrnpul2;S186	Q00PI9;S186	-0.737814	-0.678721	-1.7001	0.096426	0.661791
Prkar2a;S76	P12367;S76	-1.43584	-0.236744	-1.69794	0.0968365	0.662815
Srr;T71	Q9QZX7;T71	-0.32639	0.973874	-1.69784	0.0968544	0.662815
Trim2;S424	Q9ESN6;S424	-0.569031	-0.072836	-1.69818	0.0967909	0.662815
Ap2a1;S652	P17426;S652	-1.32912	0.906854	-1.68997	0.098363	0.662834
Atp1a3;S218	Q6PIC6;S218	0.526242	1.93135	1.69216	0.0979417	0.662834
Cacna1a;T1092	P97445;T1092	0.744411	0.277387	1.69242	0.0978914	0.662834
Cacng2;S221	O88602;S221	0.541611	-2.38547	1.68918	0.0985147	0.662834
Carhsp1;S42	Q9CR86;S42	0.650456	1.73488	1.69144	0.0980799	0.662834
Ccdc27;S136	Q3V036;S136	-0.566227	0.934058	-1.68808	0.0987276	0.662834
Dagla;S835	Q6WQJ1;S835	-0.676999	-2.14249	-1.69025	0.0983086	0.662834
Dlgap1;S973	Q9D415;S973	-0.854668	-0.13359	-1.69653	0.0971053	0.662834
Eepd1;S25	Q3TGW2;S25	0.635588	-1.83839	1.69503	0.0973914	0.662834
Gapdh;T180	P16858;T180	1.19195	-1.60225	1.68765	0.098811	0.662834
Gja1;S373	P23242;S373	0.676789	2.78614	1.68862	0.0986225	0.662834
Mapk8;T183	Q91Y86;T183	1.2353	-1.21778	1.69028	0.0983027	0.662834
Myh11;S1954	O08638;S1954	-0.776371	0.540936	-1.69009	0.0983385	0.662834
Pafah1b2;S2	Q61206;S2	0.824195	-2.49658	1.69464	0.0974658	0.662834
Pex5l;S386	Q8C437;S386	0.61943	-1.93634	1.68791	0.0987597	0.662834
Psd;S720	Q5DTT2;S720	-0.633024	1.1552	-1.69576	0.0972508	0.662834
Shank1;S2008	D3YZU1;S2008	0.772627	-0.2214	1.69342	0.0976985	0.662834
Srsf10;S133	Q9R0U0;S133	-0.710824	1.43676	-1.68908	0.0985343	0.662834
Stmn1;S28	P54227;S28	0.729058	0.623003	1.68826	0.0986916	0.662834
Top2b;S1453	Q64511;S1453	-0.857553	0.0494035	-1.69609	0.0971886	0.662834
Trp53i11;S14	Q4QQM4;S14	-2.18751	-2.43119	-1.69074	0.098213	0.662834
Ddx3x;S63	Q62167;S63	0.685374	-0.130904	1.68594	0.0991408	0.663173
Gpr158;S806	Q8C419;S806	-0.672003	-0.25071	-1.68631	0.0990709	0.663173
Synpo;S740	Q8CC35;S740	-0.792278	-0.159652	-1.68631	0.0990704	0.663173
Ercc6;S1329	F8VPZ5;S1329	0.965616	0.305872	1.6837	0.0995776	0.664848
Grm5;S860	Q3UVX5;S860	0.415368	1.0365	1.68274	0.0997645	0.664848
Slc9a3r1;S2	P70441;S2	0.779987	-2.57753	1.68346	0.0996236	0.664848
Tmem169;S4	Q8BG50;S4	0.829221	0.328266	1.68307	0.0996998	0.664848
Wipf3;S203	P0C7L0;S203	0.689469	2.37055	1.68149	0.100009	0.665854
Arfgap3;S331	Q9D8S3;S331	0.444364	-0.198525	1.67978	0.100343	0.666762
Bsn;S1050	O88737;S1050	-1.11351	2.16649	-1.67765	0.100761	0.666762
Dlgap1;S437	Q9D415;S437	-1.52313	1.22696	-1.67756	0.100779	0.666762
Eif3b;S123	Q8JZQ9;S123	-0.559698	1.92041	-1.67737	0.100817	0.666762
Eif3b;T72	Q8JZQ9;T72	-0.589128	-0.447105	-1.67703	0.100883	0.666762
Lrrc7;S850	Q80TE7;S850	-0.341511	0.363341	-1.67697	0.100894	0.666762
Map2;S496	P20357;S496	-0.59567	-0.259656	-1.67889	0.100517	0.666762
Sept4;S325	P28661;S325	-0.634205	4.34851	-1.67861	0.100573	0.666762
Shank2;S1338	Q80Z38;S1338	0.391554	1.93555	1.67622	0.101043	0.667127
Abi2;S301	P62484;S301	0.45134	0.0953819	1.67419	0.101444	0.668058
Clasp2;S413	Q8BRT1;S413	-0.872111	1.85566	-1.67407	0.101468	0.668058
Dos;S520	Q66L44;S520	0.59629	2.6779	1.67361	0.101559	0.668058
Tppp;S158	Q7TQD2;S158	-1.53944	0.851616	-1.67427	0.101427	0.668058
Syt17;S115	Q920M7;S115	-0.656482	0.577118	-1.67216	0.101846	0.669324
Tecpr1;T486	Q80VP0;T486	0.513545	-2.4966	1.6713	0.102016	0.669829
Mink1;S729	Q9JM52;S729	0.401439	5.62341	1.66958	0.102358	0.670216
Strn3;S257	Q9ERG2;S257	-0.92801	1.25424	-1.66998	0.102279	0.670216
Tnks1bp1;S1611	P58871;S1611	-0.747455	-0.124746	-1.67048	0.102179	0.670216
Caskin1;S650	Q6P9K8;S650	0.700421	2.05771	1.65877	0.10453	0.673049
Cc2d1b;S502	Q8BRN9;S502	0.471763	-0.570911	1.66171	0.103936	0.673049
Cnbp;T173	P53996;T173	-0.527126	-2.13975	-1.66528	0.103218	0.673049
Dock10;T1440	Q8BZN6;T1440	1.65942	-2.70916	1.65981	0.104321	0.673049
Dock9;S936	Q8BIK4;S936	0.695628	1.20845	1.66413	0.10345	0.673049
Grip1;T971	Q925T6;T971	-0.366052	0.580519	-1.65926	0.104431	0.673049
Hdac2;S394	P70288;S394	0.542158	2.96814	1.66042	0.104197	0.673049
Larp1;T503	Q6ZQ58;T503	0.422667	0.370358	1.65946	0.104391	0.673049
Map4k5;S433	Q8BPM2;S433	-0.593641	-0.342539	-1.66457	0.103361	0.673049
Marcksl1;T85	P28667;T85	0.630256	1.48416	1.6587	0.104545	0.673049
Rasgrf2;S725	P70392;S725	0.482147	0.540534	1.66196	0.103885	0.673049
Rtn4;T488	Q99P72;T488	-1.11876	4.2514	-1.65899	0.104486	0.673049
Sacs;S2513	Q9JLC8;S2513	0.627234	-2.19155	1.65943	0.104396	0.673049
Sipa1l3;S1538	G3X9J0;S1538	-0.455522	0.250106	-1.66353	0.10357	0.673049
Snph;S20	Q80U23;S20	-1.21554	1.61701	-1.6608	0.10412	0.673049
Snph;S200	Q80U23;S200	0.689018	0.56478	1.66606	0.103061	0.673049
Stx1b;S108	P61264;S108	0.615378	-1.43787	1.66555	0.103163	0.673049
Tnks1bp1;S178	P58871;S178	0.556536	0.476616	1.66481	0.103313	0.673049
Wdfy3;S3321	Q6VNB8;S3321	1.18696	-2.56529	1.6585	0.104585	0.673049
Anln;S656	Q8K298;S656	-1.2357	-0.36022	-1.65695	0.104901	0.673299
Cacnb1;S26	Q8R3Z5;S26	-0.452697	-1.63642	-1.65631	0.10503	0.673299
Fmnl1;T509	Q9JL26;T509	0.521339	-1.90582	1.65777	0.104733	0.673299
Smarcad1;S124	Q04692;S124	-0.455356	-1.71919	-1.65574	0.105146	0.673299
Stk3;S316	Q9JI10;S316	0.530114	-0.745364	1.65573	0.105148	0.673299
Vps13c;S1396	Q8BX70;S1396	0.691961	1.7713	1.65552	0.105191	0.673299
Nucks1;S181	Q80XU3;S181	-1.09395	1.48964	-1.65503	0.105291	0.673334
Rims1;T412	Q99NE5;T412	0.480199	2.08777	1.65389	0.105524	0.67422
Shank3;S1163	Q4ACU6;S1163	0.769278	-1.57843	1.65287	0.105732	0.674941
Slc6a17;S20	Q8BJI1;S20	-0.739988	-0.969581	-1.6524	0.105829	0.674957
Ank2;S1700	Q8C8R3;S1700	-0.909376	1.8816	-1.64883	0.106562	0.675997
Kiaa1107;S481	Q80TK0;S481	0.524219	3.27424	1.65008	0.106303	0.675997
Ppp1r37;S566	Q8BKR5;S566	0.6156	-0.337754	1.64981	0.10636	0.675997
Sh2d5;S421	Q8JZW5;S421	0.477652	1.02463	1.65	0.106321	0.675997
Thrap3;S559	Q569Z6;S559	-0.693727	-1.35512	-1.6489	0.106546	0.675997
Tnks1bp1;S1612	P58871;S1612	-0.575677	0.405317	-1.64919	0.106487	0.675997
Aarsd1;S88	Q3THG9;S88	0.598113	1.19021	1.64601	0.107143	0.676085
Abl2;S936	Q4JIM5;S936	0.447261	-1.07671	1.63313	0.109835	0.676085
Add1;S586	Q9QYC0;S586	-0.962003	0.590483	-1.62887	0.110736	0.676085
Add3;S64	Q9QYB5;S64	-0.547234	-1.83618	-1.61572	0.113559	0.676085
Agfg1;T177	Q8K2K6;T177	0.974723	-0.590557	1.62088	0.112445	0.676085
Aktip;T29	Q64362;T29	0.55893	0.926077	1.62402	0.111771	0.676085
Amph;T274	Q7TQF7;T274	1.36266	1.37105	1.62052	0.112523	0.676085
Arfgef1;S52	G3X9K3;S52	0.476705	1.96651	1.62597	0.111355	0.676085
Arhgap32;S1688	Q811P8;S1688	0.578678	-3.20649	1.6265	0.111242	0.676085
Arhgap39;S384	P59281;S384	0.463585	-3.3357	1.61856	0.112945	0.676085
Bai1;S1276	Q3UHD1;S1276	0.941247	-1.11947	1.62798	0.110925	0.676085
Baiap2;S326	Q8BKX1;S326	-1.08668	1.58487	-1.62276	0.112041	0.676085
Baiap2;T341	Q8BKX1;T341	0.596508	0.553741	1.64402	0.107556	0.676085
Cacna1e;S2097	Q61290;S2097	0.599622	-1.33633	1.6394	0.108519	0.676085
Caskin1;S1402	Q6P9K8;S1402	0.605753	0.693516	1.61519	0.113674	0.676085
Cpeb3;S197	Q7TN99;S197	0.659149	-0.122991	1.62981	0.110538	0.676085
Ctnnd2;S412	O35927;S412	0.329809	5.47933	1.6458	0.107186	0.676085
Dbn1;S274	Q9QXS6;S274	-0.597381	-0.484669	-1.63398	0.109656	0.676085
Dclk1;S32	Q9JLM8;S32	0.359886	4.55934	1.64341	0.107682	0.676085
Ddn;S388	Q80TS7;S388	0.621886	-1.55377	1.63299	0.109865	0.676085
Dlg4;S295	Q62108;S295	-1.42539	-1.53736	-1.61849	0.112961	0.676085
Dlg4;S73	Q62108;S73	-0.639142	-1.11956	-1.62456	0.111657	0.676085
Dlgap2;S1047	Q8BJ42;S1047	-0.473324	1.83279	-1.61669	0.11335	0.676085
Dlgap3;S930	Q6PFD5;S930	-1.40416	0.574098	-1.63815	0.108779	0.676085
Dpysl2;S507	O08553;S507	-1.10847	0.0563356	-1.62382	0.111814	0.676085
Dpysl2;S522	O08553;S522	-1.10153	4.57092	-1.62345	0.111894	0.676085
Dpysl2;T509	O08553;T509	0.326357	8.09187	1.6157	0.113565	0.676085
Efnb1;S282	P52795;S282	0.413768	-2.83849	1.64779	0.106776	0.676085
Elfn1;S675	Q8C8T7;S675	-0.763589	-1.99629	-1.62923	0.110661	0.676085
Evl;S302	P70429;S302	0.636149	0.657916	1.61784	0.113101	0.676085
Gap43;S96	P06837;S96	0.727901	7.07009	1.62817	0.110886	0.676085
Gpm6b;S320	P35803;S320	-0.60675	4.9922	-1.6252	0.11152	0.676085
Gpsm1;S653	Q6IR34;S653	0.677993	-0.68566	1.63157	0.110165	0.676085
Grin2b;S1019	Q01097;S1019	0.63948	-1.02435	1.6169	0.113304	0.676085
Ica1l;S316	Q3TY65;S316	-0.456326	-0.742351	-1.61467	0.113788	0.676085
Iqsec2;S1113	Q5DU25;S1113	-0.430211	-0.269811	-1.62561	0.111432	0.676085
Iqsec2;S1114	Q5DU25;S1114	-0.419648	-0.262525	-1.61793	0.113082	0.676085
Kcnq2;S352	Q9Z351;S352	0.441962	-2.00609	1.6314	0.1102	0.676085
Larp4b;S603	Q6A0A2;S603	0.552474	-0.759768	1.61533	0.113645	0.676085
Map7d1;S444	A2AJI0;S444	0.485514	0.121018	1.62087	0.112448	0.676085
Neto1;S483	Q8R4I7;S483	-0.684531	1.98122	-1.61469	0.113784	0.676085
Nr2c2;S351	P49117;S351	0.458122	-2.66504	1.64171	0.108035	0.676085
Nsf;S739	P46460;S739	-0.789536	-2.02723	-1.63535	0.109367	0.676085
Osbp;S238	Q3B7Z2;S238	0.46972	-0.0114005	1.62151	0.11231	0.676085
Pcbp1;S190	P60335;S190	-0.779658	-0.889402	-1.64803	0.106726	0.676085
Pclo;S75	Q9QYX7;S75	0.603387	0.66627	1.62795	0.110932	0.676085
Pfkfb2;S469	P70265;S469	0.367516	1.36016	1.62622	0.111302	0.676085
Pgm1;S117	Q9D0F9;S117	0.368403	4.19544	1.62763	0.111001	0.676085
Plekhm3;S132	Q8BM47;S132	0.818246	-2.49768	1.62164	0.112282	0.676085
Prpf4b;S368	Q61136;S368	-0.709233	-0.546574	-1.63206	0.110061	0.676085
Ptk2b;S375	Q9QVP9;S375	0.492483	4.96997	1.62664	0.111212	0.676085
Pvrl1;S421	Q9JKF6;S421	-0.671511	1.39409	-1.61547	0.113615	0.676085
Rab6a;S2	P35279;S2	0.5067	-2.29701	1.62615	0.111317	0.676085
Ralgapa1;S772	Q6GYP7;S772	0.901262	0.0796636	1.62666	0.111207	0.676085
Ralgapa1;T753	Q6GYP7;T753	0.638956	-2.74647	1.62575	0.111402	0.676085
Rltpr;S1096	Q3V3V9;S1096	0.444305	-1.85653	1.62557	0.11144	0.676085
Rptor;S863	Q8K4Q0;S863	-1.00647	0.0958935	-1.64197	0.107982	0.676085
Rragc;S15	Q99K70;S15	-0.619408	-1.24546	-1.62296	0.111999	0.676085
Rufy3;S49	Q9D394;S49	1.67535	-0.594814	1.62009	0.112616	0.676085
Sh3pxd2a;S592	O89032;S592	0.593646	0.90131	1.62354	0.111875	0.676085
Slc15a2;S9	Q9ES07;S9	0.738548	0.236535	1.6237	0.111841	0.676085
Slc35g2;S409	D3YVE8;S409	0.388259	-1.92424	1.62629	0.111287	0.676085
Soga3;S639	Q6NZL0;S639	0.43115	-0.139602	1.61566	0.113573	0.676085
Srpk1;T448	O70551;T448	-0.457969	-1.23933	-1.6218	0.112247	0.676085
Srrm2;S1984	Q8BTI8;S1984	-0.334102	1.44377	-1.62227	0.112148	0.676085
Stk39;T366	Q9Z1W9;T366	0.645428	0.396525	1.63904	0.108592	0.676085
Stx16;S35	Q8BVI5;S35	-0.721899	2.61466	-1.6336	0.109735	0.676085
Stx1b;S14	P61264;S14	-1.94258	7.65946	-1.62705	0.111124	0.676085
Stxbp5l;S819	Q5DQR4;S819	-0.702474	1.55932	-1.62103	0.112414	0.676085
Svil;S960	Q8K4L3;S960	0.553272	-0.482197	1.63967	0.10846	0.676085
Syn1;S11	O88935;S11	-1.1941	1.36323	-1.61831	0.113001	0.676085
Thrap3;S238	Q569Z6;S238	-0.396598	-2.47115	-1.62589	0.111371	0.676085
Thumpd1;S86	Q99J36;S86	-1.39629	2.6983	-1.64522	0.107307	0.676085
Thumpd1;S88	Q99J36;S88	-1.3991	2.68064	-1.63472	0.1095	0.676085
Tmem163;S45	Q8C996;S45	-0.546562	-0.0357643	-1.62576	0.111399	0.676085
Xkr4;T579	Q5GH67;T579	0.379066	-0.121186	1.62905	0.110699	0.676085
Acin1;S391	Q9JIX8;S391	-0.418193	-0.839789	-1.60997	0.114812	0.67694
Add2;T599	Q9QYB8;T599	-1.14832	2.89751	-1.61086	0.114618	0.67694
Add3;S673	Q9QYB5;S673	0.439644	2.98019	1.60534	0.115829	0.67694
Apc;S742	Q61315;S742	0.684367	0.201752	1.60768	0.115315	0.67694
Arhgef17;S994	Q80U35;S994	0.573668	-2.27487	1.60595	0.115695	0.67694
Crmp1;S518	P97427;S518	-1.4129	2.86726	-1.60623	0.115635	0.67694
Ctnnd1;S352	P30999;S352	0.452244	-0.591674	1.60492	0.115924	0.67694
Gja1;S372	P23242;S372	0.676789	2.75315	1.60498	0.11591	0.67694
Limch1;S719	Q3UH68;S719	0.434956	0.989782	1.6061	0.115664	0.67694
Lrsam1;S234	Q80ZI6;S234	-0.681271	0.406902	-1.6049	0.115927	0.67694
Otud7a;S711	Q8R554;S711	0.436848	-0.0120032	1.61354	0.114033	0.67694
Prickle2;S608	Q80Y24;S608	-0.680039	-0.985985	-1.60545	0.115806	0.67694
Prrt2;S98	E9PUL5;S98	-0.933383	2.1001	-1.61095	0.114599	0.67694
Rab11fip5;S209	Q8R361;S209	0.835078	-0.885837	1.60712	0.115439	0.67694
Rasgrf2;S484	P70392;S484	-0.413463	-1.19734	-1.60881	0.115067	0.67694
Sgip1;S265	Q8VD37;S265	0.576656	3.63866	1.60695	0.115476	0.67694
Syn1;S36	O88935;S36	-1.01895	0.361673	-1.60528	0.115844	0.67694
Syt10;T136	Q9R0N4;T136	-0.427028	-2.10146	-1.60747	0.115362	0.67694
Tceal3;S30	Q8R0A5;S30	-0.586252	5.11906	-1.60986	0.114837	0.67694
Ttc7b;S677	E9Q6P5;S677	-0.888433	-1.8467	-1.60971	0.11487	0.67694
Ufd1l;S299	P70362;S299	0.326326	1.29654	1.61146	0.114487	0.67694
Atp2b2;S1105	Q9R0K7;S1105	0.574608	0.748777	1.60428	0.116064	0.677185
Dpysl2;T514	O08553;T514	-1.00685	4.68746	-1.60366	0.1162	0.677422
Osbp2;S281	Q5QNQ6;S281	-0.765171	0.40094	-1.6028	0.116392	0.677985
Ston2;S270	Q8BZ60;S270	0.702885	-0.239344	1.60212	0.116541	0.6783
Rictor;S1301	Q6QI06;S1301	0.444169	-0.495411	1.60156	0.116667	0.678477
Vamp1;S63	Q62442;S63	-0.462631	-2.21533	-1.60112	0.116763	0.678482
Cdc42bpb;S1685	Q7TT50;S1685	-0.695099	0.652811	-1.59986	0.117043	0.679003
Phyhipl;S11	Q8BGT8;S11	0.63077	0.269834	1.59992	0.117029	0.679003
Hcn2;S842	O88703;S842	-0.886639	-0.0927664	-1.59716	0.117644	0.681719
Tbc1d1;S660	Q60949;S660	0.546214	-1.91924	1.5969	0.117703	0.681719
Map7d1;S256	A2AJI0;S256	0.432643	-2.5617	1.59556	0.118003	0.682901
Khdrbs1;S58	Q60749;S58	-0.791805	1.26676	-1.59479	0.118175	0.683278
Napb;S157	P28663;S157	-0.61468	0.175712	-1.59441	0.11826	0.683278
Skt;S1808	A2AQ25;S1808	0.547468	-0.957506	1.59344	0.118479	0.683989
Shisa7;S437	Q8C3Q5;S437	0.699216	1.01193	1.59275	0.118634	0.684328
Acot1;S67	Q9QYR7;S67	0.503214	-0.35829	1.58834	0.119628	0.685624
Bag3;S390	Q9JLV1;S390	0.622881	0.769555	1.58914	0.119447	0.685624
Cnksr2;S906	Q80YA9;S906	-0.700944	1.90549	-1.59034	0.119176	0.685624
Ctnnd2;S357	O35927;S357	0.619183	0.637826	1.59118	0.118986	0.685624
Hbb-b1;S88	P02088;S88	-0.435621	-1.50563	-1.58898	0.119483	0.685624
Rc3h1;S770	Q4VGL6;S770	0.536473	-1.45457	1.58835	0.119625	0.685624
Scaf1;S240	Q5U4C3;S240	-0.703107	0.351366	-1.5895	0.119365	0.685624
Ubxn1;S200	Q922Y1;S200	0.890381	0.0680922	1.59009	0.119233	0.685624
Arhgap5;S1194	P97393;S1194	0.621367	-1.63134	1.58629	0.120092	0.685979
Hivep3;S555	A2A884;S555	0.46269	-2.1355	1.58652	0.12004	0.685979
Map2k1;T386	P31938;T386	0.531338	1.65632	1.58728	0.119867	0.685979
Sltm;S289	Q8CH25;S289	0.388947	0.989622	1.58629	0.120092	0.685979
Tubb4b;S339	P68372;S339	0.58432	0.198838	1.58594	0.120172	0.685979
Adam10;T720	O35598;T720	0.418827	-0.3679	1.5842	0.120567	0.687074
Fam117b;S10	Q3U3E2;S10	0.90464	-0.66534	1.58438	0.120525	0.687074
Nefm;S605	P08553;S605	0.675515	6.33334	1.58382	0.120653	0.687074
Map2;T1650	P20357;T1650	0.40913	3.6403	1.58336	0.120758	0.687127
Cap2;S300	Q9CYT6;S300	-1.49185	-3.12153	-1.58202	0.121066	0.688155
Cdip1;T27	Q9DB75;T27	-0.799848	0.447935	-1.58088	0.121325	0.688155
Cep170b;S340	Q80U49;S340	-0.440091	0.545323	-1.5812	0.121251	0.688155
Tmcc2;S435	Q80W04;S435	0.458663	1.15922	1.58129	0.121231	0.688155
Arhgap23;S421	Q69ZH9;S421	0.40455	-0.181075	1.57978	0.121578	0.688902
Begain;T263	Q68EF6;T263	-0.526238	-1.96269	-1.5786	0.121849	0.688902
Cep170b;S419	Q80U49;S419	-0.596065	-0.527908	-1.57857	0.121855	0.688902
Hist2h2bb;S39	Q64525;S39	0.629876	-2.25293	1.5782	0.121941	0.688902
Tra2b;T201	P62996;T201	0.655338	3.6655	1.57848	0.121876	0.688902
Crmp1;S542	P97427;S542	-0.810495	1.31593	-1.57775	0.122043	0.688932
Aak1;T389	Q3UHJ0;T389	0.942827	-1.47762	1.56751	0.124416	0.689073
Abcf1;S225	Q6P542;S225	-0.547652	2.33223	-1.56191	0.125731	0.689073
Add1;S12	Q9QYC0;S12	-0.545422	6.11192	-1.56342	0.125377	0.689073
Add1;S364	Q9QYC0;S364	-0.861964	-0.757785	-1.57423	0.122855	0.689073
Adgra1;T239	Q8C4G9;T239	0.78522	0.63757	1.5706	0.123698	0.689073
Ank2;S1699	Q8C8R3;S1699	-0.832922	1.82755	-1.57034	0.123757	0.689073
Ank2;S901	Q8C8R3;S901	0.753631	-0.864046	1.57542	0.12258	0.689073
Apba1;S84	B2RUJ5;S84	0.617366	2.23606	1.57412	0.12288	0.689073
Arhgap21;S314	Q6DFV3;S314	0.486559	2.13997	1.57599	0.122449	0.689073
Arhgap35;S970	Q91YM2;S970	0.689925	1.24475	1.57225	0.123314	0.689073
Clcn6;S726	O35454;S726	0.676823	-1.52636	1.5605	0.126063	0.689073
Dpysl5;S532	Q9EQF6;S532	0.933882	3.78358	1.56815	0.124267	0.689073
Dpysl5;S536	Q9EQF6;S536	0.906464	1.21893	1.56524	0.124949	0.689073
Ermn;S211	Q5EBJ4;S211	0.379364	2.75884	1.56315	0.125439	0.689073
Gapdh;T151	P16858;T151	0.501965	-0.00522528	1.56578	0.124822	0.689073
Hist1h1d;T18	P43277;T18	0.462702	-0.9219	1.56146	0.125838	0.689073
Lysmd2;S5	Q9D7V2;S5	0.410581	-3.01052	1.57576	0.122502	0.689073
Map1b;T1784	P14873;T1784	-1.23877	-0.189667	-1.56187	0.125739	0.689073
Mcf2l;S973	Q64096;S973	-0.547053	-1.10737	-1.56271	0.125542	0.689073
Mef2d;S180	Q63943;S180	0.731727	-1.40022	1.57416	0.122872	0.689073
Mtmr2;S21	Q9Z2D1;S21	-0.526065	0.680149	-1.57433	0.122831	0.689073
Pikfyve;S23	Q9Z1T6;S23	0.794397	-0.803762	1.56647	0.12466	0.689073
Pkp4;S446	Q68FH0;S446	0.472345	0.774331	1.56406	0.125224	0.689073
Prkca;S319	P20444;S319	-1.52317	1.71418	-1.56658	0.124634	0.689073
Prrc2a;S761	Q7TSC1;S761	-0.37458	-1.02826	-1.57158	0.12347	0.689073
Prrt3;S791	Q6PE13;S791	-1.17365	-0.880366	-1.56306	0.125461	0.689073
Ralgapb;S420	Q8BQZ4;S420	0.823739	0.699411	1.5735	0.123025	0.689073
Rims1;S742	Q99NE5;S742	-0.873166	-1.4067	-1.56429	0.12517	0.689073
Safb;S235	D3YXK2;S235	0.486931	0.616055	1.56859	0.124164	0.689073
Scaf1;S676	Q5U4C3;S676	-0.470524	-1.97309	-1.56198	0.125714	0.689073
Shank3;S694	Q4ACU6;S694	-0.469261	-1.36806	-1.56022	0.12613	0.689073
Shisa7;S287	Q8C3Q5;S287	0.782408	1.05824	1.56106	0.125932	0.689073
Sipa1l2;S195	Q80TE4;S195	0.548054	-1.55724	1.56035	0.126099	0.689073
Sltm;S999	Q8CH25;S999	0.744476	0.550677	1.5685	0.124185	0.689073
Smn1;S28	P97801;S28	-0.503499	-3.42016	-1.56397	0.125247	0.689073
Stxbp5l;S822	Q5DQR4;S822	-0.685092	1.51224	-1.56903	0.124063	0.689073
Tanc1;S445	Q0VGY8;S445	-0.536969	-1.07537	-1.56177	0.125764	0.689073
Tnks1bp1;S429	P58871;S429	0.461861	0.522747	1.56824	0.124247	0.689073
Trim46;S79	Q7TNM2;S79	0.615281	1.04368	1.5619	0.125732	0.689073
Tuba1b;T80	P05213;T80	-0.580965	-0.885774	-1.56179	0.125758	0.689073
Yap1;S94	P46938;S94	-0.424237	-0.24801	-1.57088	0.123633	0.689073
Znf330;S287	Q922H9;S287	-0.783601	-0.0685499	-1.57186	0.123404	0.689073
Map1a;S1606	Q9QYR6;S1606	-0.346688	3.45807	-1.55968	0.126257	0.689238
Dlgap2;S1012	Q8BJ42;S1012	-0.794445	1.89539	-1.55867	0.126497	0.689491
Ptprz1;S1680	B9EKR1;S1680	-0.70931	-1.57023	-1.55871	0.126487	0.689491
Map1b;S1877	P14873;S1877	0.957727	2.80063	1.55718	0.126848	0.68982
Plch2;S1048	A2AP18;S1048	-0.48246	2.05994	-1.55722	0.12684	0.68982
Wdtc1;S511	Q80ZK9;S511	0.538763	-0.699462	1.55756	0.126759	0.68982
Lmtk2;S1418	Q3TYD6;S1418	0.350056	-0.872696	1.5567	0.126963	0.689918
Arhgap39;S403	P59281;S403	0.608865	-1.4094	1.55387	0.127637	0.690719
Grin1;S890	P35438;S890	0.474534	0.649942	1.55409	0.127583	0.690719
Kiaa1671;S259	Q8BRV5;S259	0.82247	-0.150727	1.55457	0.127471	0.690719
Ppp6r1;S531	Q7TSI3;S531	-0.491755	1.3666	-1.55415	0.127571	0.690719
Slc6a17;S682	Q8BJI1;S682	0.504399	2.07877	1.55413	0.127574	0.690719
Wnk2;S1797	Q3UH66;S1797	0.521241	1.28469	1.55364	0.127692	0.690719
Sh3pxd2a;S792	O89032;S792	-0.465602	-1.97497	-1.55271	0.127914	0.691396
Arhgap23;S361	Q69ZH9;S361	-0.443596	1.03959	-1.55216	0.128044	0.691576
Pex5l;S388	Q8C437;S388	0.3739	0.952563	1.55123	0.128268	0.691732
Plcd3;S492	Q8K2J0;S492	-0.791399	-1.31326	-1.5515	0.128202	0.691732
Bcl11a;S700	Q9QYE3;S700	0.829131	-2.27477	1.5467	0.129355	0.691873
Ccnt2;S477	Q7TQK0;S477	0.46136	-0.719391	1.54999	0.128564	0.691873
Cdc42ep4;S116	Q9JM96;S116	0.649556	-0.87515	1.54391	0.130029	0.691873
Dnm1;S264	P39053;S264	0.340098	-2.39377	1.55033	0.128484	0.691873
Fmnl2;S171	A2APV2;S171	-0.977578	0.771309	-1.54478	0.129819	0.691873
Fzd3;T542	Q61086;T542	-0.56736	-2.47156	-1.54607	0.129508	0.691873
Ina;S37	P46660;S37	0.727581	0.238475	1.54449	0.129888	0.691873
Iqsec3;S132	Q3TES0;S132	-0.53478	1.14918	-1.54966	0.128645	0.691873
Kiaa0195;S225	Q7TSH8;S225	-0.656323	0.250345	-1.54908	0.128782	0.691873
Map1a;S1580	Q9QYR6;S1580	-1.4832	1.28005	-1.54538	0.129674	0.691873
Map1a;S2082	Q9QYR6;S2082	-0.516293	3.66117	-1.54785	0.129079	0.691873
Map2;S1165	P20357;S1165	-0.490302	-1.56356	-1.54509	0.129743	0.691873
Ppp1r9b;S100	Q6R891;S100	0.267651	4.95332	1.54346	0.130139	0.691873
Prrt2;S208	E9PUL5;S208	0.465944	3.87083	1.54471	0.129835	0.691873
Slc16a1;S230	P53986;S230	-0.393733	-0.778798	-1.54854	0.128913	0.691873
Snx30;S40	Q8CE50;S40	-0.826685	-1.1035	-1.54936	0.128716	0.691873
Sult4a1;T11	P63046;T11	1.07724	0.457924	1.54709	0.129261	0.691873
Syne2;S6371	Q6ZWQ0;S6371	-0.455881	-2.17656	-1.54759	0.129141	0.691873
Ubxn1;S188	Q922Y1;S188	0.762837	-0.229273	1.54363	0.130096	0.691873
Gpkow;S6	Q56A08;S6	0.58763	-1.18817	1.54247	0.130378	0.692244
Sorbs1;S345	Q62417;S345	0.394879	-0.210531	1.54237	0.130403	0.692244
Lsp1;S243	P19973;S243	0.572816	-2.6171	1.54139	0.13064	0.692469
Rltpr;S1277	Q3V3V9;S1277	-0.796882	0.869265	-1.54151	0.130612	0.692469
Otub1;S16	Q7TQI3;S16	0.597941	-0.674649	1.53888	0.131252	0.695194
Anapc4;S779	Q91W96;S779	-0.493013	-0.106497	-1.5377	0.131541	0.696209
Plekha6;S864	Q7TQG1;S864	-0.482847	0.796964	-1.53692	0.131731	0.696695
Pclo;S1439	Q9QYX7;S1439	0.71563	2.10372	1.53515	0.132165	0.698475
Atp8a1;S1126	P70704;S1126	-1.3961	2.31642	-1.53277	0.132748	0.698509
Cdk13;S384	Q69ZA1;S384	-0.342324	-1.68036	-1.53291	0.132713	0.698509
Epb41l3;T64	Q9WV92;T64	0.344814	2.65214	1.53379	0.132497	0.698509
Fam160a2;S863	Q3U2I3;S863	1.03554	-0.480619	1.53319	0.132645	0.698509
Tmem74;S11	Q8BQU7;S11	0.484454	-0.214844	1.53277	0.132749	0.698509
Tppp;T15	Q7TQD2;T15	-0.595289	4.88094	-1.53272	0.13276	0.698509
Caskin1;S723	Q6P9K8;S723	1.23058	-1.58175	1.52945	0.133568	0.699662
Edc4;S565	Q3UJB9;S565	0.603445	-0.340037	1.52989	0.13346	0.699662
Epb41l1;S540	Q9Z2H5;S540	-1.2193	2.22237	-1.5295	0.133556	0.699662
Epb41l1;T488	Q9Z2H5;T488	-0.738427	2.93968	-1.53048	0.133314	0.699662
Pde1b;S18	Q01065;S18	-0.377587	-1.69219	-1.53005	0.133419	0.699662
Sptb;T2072	P15508;T2072	0.568369	0.501705	1.52946	0.133566	0.699662
Ank3;S958	G5E8K5;S958	-0.379797	-2.44399	-1.52708	0.134155	0.700268
Cnksr2;S801	Q80YA9;S801	-0.751853	2.28265	-1.52745	0.134064	0.700268
Gja1;T326	P23242;T326	1.29029	2.74199	1.52851	0.1338	0.700268
Ppp1r1a;S43	Q9ERT9;S43	-1.09078	-1.38103	-1.52732	0.134096	0.700268
Tubb3;T232	Q9ERD7;T232	-0.651252	-3.36131	-1.527	0.134175	0.700268
Srpk2;S50	O54781;S50	-0.47065	-0.47143	-1.52651	0.134296	0.700383
Ist1;T276	Q9CX00;T276	-0.560929	-0.697717	-1.52527	0.134605	0.701483
Rbsn;S214	Q80Y56;S214	0.745656	0.533165	1.52303	0.135164	0.703367
Syn2;S98	Q64332;S98	0.485531	-1.26711	1.52315	0.135134	0.703367
Iscu;S30	Q9D7P6;S30	-0.854944	0.338378	-1.52246	0.135307	0.703594
Iqgap2;S16	Q3UQ44;S16	-0.346626	-0.033556	-1.52136	0.135581	0.704506
Cflar;T471	O35732;T471	-0.665259	-0.004554	-1.5203	0.135846	0.704971
Col4a3bp;S377	Q9EQG9;S377	0.812268	-1.92724	1.52021	0.135868	0.704971
Cep170;S568	Q6A065;S568	0.466107	0.225747	1.51874	0.136238	0.706377
Aak1;S774	Q3UHJ0;S774	-0.473959	-1.57638	-1.51759	0.136527	0.707357
Dock4;T1911	P59764;T1911	0.439887	-2.30931	1.51623	0.13687	0.707381
Mtmr2;S9	Q9Z2D1;S9	0.418151	-1.40968	1.51643	0.136819	0.707381
Palm;S116	Q9Z0P4;S116	0.927218	3.61809	1.51661	0.136775	0.707381
Serbp1;S202	Q9CY58;S202	-0.395886	-0.505642	-1.516	0.136929	0.707381
Akap12;S613	Q9WTQ5;S613	-0.865681	0.109997	-1.50931	0.138623	0.707415
Arhgef7;S776	Q9ES28;S776	-0.498733	-1.20036	-1.51554	0.137044	0.707415
Elfn1;S674	Q8C8T7;S674	-0.727985	-2.03389	-1.51505	0.137167	0.707415
Gorasp1;T216	Q91X51;T216	-0.88595	0.435026	-1.51141	0.138091	0.707415
Got2;T332	P05202;T332	-0.35483	-2.45703	-1.51477	0.137239	0.707415
Homer3;S120	Q99JP6;S120	-0.495289	-0.844215	-1.51341	0.137582	0.707415
Nav1;S808	Q8CH77;S808	-0.927341	-0.274585	-1.51247	0.137821	0.707415
Rmdn3;S46	Q3UJU9;S46	0.39498	3.73626	1.51239	0.137842	0.707415
Slc1a2;S21	P43006;S21	-0.843718	-2.80264	-1.51074	0.138261	0.707415
Slc4a7;S57	Q8BTY2;S57	0.536482	-1.06793	1.51225	0.137877	0.707415
Srgap3;S868	Q812A2;S868	0.379245	0.640986	1.51173	0.138008	0.707415
Strada;S313	Q3UUJ4;S313	-0.588053	-0.56067	-1.51201	0.137937	0.707415
Syn1;S293	O88935;S293	0.58453	-1.02257	1.51045	0.138333	0.707415
Syne1;T2268	Q6ZWR6;T2268	-0.591984	-1.19836	-1.50937	0.138608	0.707415
Top2b;S1387	Q64511;S1387	-0.536512	2.26388	-1.50949	0.138578	0.707415
Ube2o;S893	Q6ZPJ3;S893	0.385199	2.58245	1.51393	0.13745	0.707415
Xpo6;T204	Q924Z6;T204	0.653739	-0.368448	1.51	0.138449	0.707415
Arhgap39;S169	P59281;S169	1.0063	-0.741849	1.50789	0.138986	0.7079
Bclaf1;S177	Q8K019;S177	-0.555341	2.90894	-1.50804	0.138947	0.7079
Taf12;S51	Q8VE65;S51	0.535394	0.237716	1.50777	0.139016	0.7079
Acaca;S79	Q5SWU9;S79	0.46574	-0.235036	1.49597	0.142055	0.708418
Add3;S724	Q9QYC0;S724	1.37481	2.08165	1.5007	0.140833	0.708418
Agap2;S147	Q3UHD9;S147	0.608668	-0.65964	1.49321	0.142775	0.708418
Ak5;S108	Q920P5;S108	-0.915889	0.0746077	-1.49928	0.141198	0.708418
Akap5;S79	D3YVF0;S79	0.455272	0.551642	1.50311	0.140212	0.708418
Arfgef3;S471	Q3UGY8;S471	0.678678	1.08946	1.49308	0.14281	0.708418
Atp8a1;S29	P70704;S29	-0.680656	0.51068	-1.49324	0.142767	0.708418
Bcl9;S686	Q9D219;S686	0.765091	-2.50058	1.50567	0.139555	0.708418
Bsn;S1051	O88737;S1051	-0.587766	4.22103	-1.49399	0.142572	0.708418
C2cd4cC2CD4 family;S259	Q5HZI2;S259	1.0757	-0.296805	1.49915	0.141231	0.708418
Cacng8;S254	Q8VHW2;S254	-0.460326	0.0892333	-1.49466	0.142397	0.708418
Camkk2;S511	Q8C078;S511	-0.448643	-1.48769	-1.49407	0.14255	0.708418
Caskin1;S1048	Q6P9K8;S1048	0.521292	-2.69178	1.5003	0.140936	0.708418
Caskin1;S710	Q6P9K8;S710	0.768177	1.23692	1.49917	0.141226	0.708418
Cdkl5;S377	Q3UTQ8;S377	0.738133	-0.528601	1.49811	0.141501	0.708418
Epb41l1;S868	Q9Z2H5;S868	-0.712205	-0.457992	-1.50191	0.140519	0.708418
Fam131b;S322	Q3TY60;S322	0.410416	0.100303	1.50409	0.139959	0.708418
Huwe1;T3927	Q7TMY8;T3927	-0.907999	0.380536	-1.50144	0.140642	0.708418
Kcnq2;S681	Q9Z351;S681	0.343714	1.08311	1.49236	0.142996	0.708418
Map2;S18	P20357;S18	-0.925437	1.14582	-1.5054	0.139622	0.708418
Nf1;S2525	Q04690;S2525	0.621345	0.851625	1.49502	0.142304	0.708418
Npdc1;S236	Q64322;S236	-0.520808	-1.69055	-1.49644	0.141934	0.708418
Osbp2;S284	Q5QNQ6;S284	-0.803923	1.41628	-1.49806	0.141513	0.708418
Osbpl6;S368	Q8BXR9;S368	0.610539	-1.12938	1.50294	0.140256	0.708418
Pgam1;S118	Q9DBJ1;S118	0.420944	-1.92647	1.49645	0.141932	0.708418
Phldb1;S522	Q6PDH0;S522	0.56747	-1.43403	1.49766	0.141617	0.708418
Plxdc2;S507	Q9DC11;S507	0.648537	1.53007	1.49892	0.141291	0.708418
Rbm43;S137	Q99J64;S137	0.539677	-1.13589	1.49584	0.14209	0.708418
Sash1;S435	P59808;S435	0.446457	-1.62006	1.4954	0.142205	0.708418
Slc6a17;S13	Q8BJI1;S13	-0.65313	4.48646	-1.49367	0.142656	0.708418
Snx2;S119	Q9CWK8;S119	0.477061	-2.70054	1.49497	0.142317	0.708418
Srrm1;S391	Q52KI8;S391	-0.366128	0.878916	-1.50377	0.140041	0.708418
Syn1;S432	O88935;S432	-0.693599	0.849534	-1.50613	0.139437	0.708418
Syne1;S8284	Q6ZWR6;S8284	-0.558043	-1.6576	-1.49704	0.141779	0.708418
Tanc1;S267	Q0VGY8;S267	0.309698	0.971763	1.49257	0.142941	0.708418
Tnik;S541	P83510;S541	0.953276	-1.88206	1.4987	0.141349	0.708418
U2surp;S67	Q6NV83;S67	0.576193	0.118766	1.50224	0.140434	0.708418
Ube2o;S510	Q6ZPJ3;S510	-0.638156	0.407359	-1.49887	0.141304	0.708418
Wdr47;S344	Q8CGF6;S344	0.996288	-1.79062	1.49974	0.141079	0.708418
Arhgap21;S471	Q6DFV3;S471	0.347167	0.64345	1.49167	0.143177	0.708823
Cdh11;S788	P55288;S788	-0.402118	-1.19829	-1.49076	0.143415	0.709013
Clip2;S924	Q9Z0H8;S924	0.396951	2.86398	1.49094	0.143367	0.709013
Slc6a15;S687	Q8BG16;S687	0.552096	-0.673321	1.4886	0.143982	0.709846
Srrm2;T1986	Q8BTI8;T1986	-0.334102	1.43194	-1.48879	0.14393	0.709846
Tmem87a;S540	Q8BXN9;S540	-0.80987	-0.196655	-1.48964	0.143707	0.709846
Trim2;S10	Q9ESN6;S10	0.570313	-0.839381	1.48917	0.143832	0.709846
Astn1;S906	Q61137;S906	-1.12702	-0.669366	-1.48609	0.144641	0.710956
Cby1;S20	Q9D1C2;S20	0.561024	-0.900185	1.48529	0.144852	0.710956
Edc4;S6	Q3UJB9;S6	-0.531938	-0.108127	-1.48537	0.144831	0.710956
Oxr1;S202	Q4KMM3;S202	1.58108	1.97386	1.48665	0.144494	0.710956
Pitpnm1;S373	O35954;S373	-0.536382	-1.57274	-1.48625	0.144599	0.710956
Specc1;S54	Q5SXY1;S54	-0.72836	2.17128	-1.48509	0.144906	0.710956
Sqstm1;S334	Q64337;S334	0.73289	0.579363	1.48687	0.144437	0.710956
Prpsap2;S227	Q8R574;S227	1.23327	3.88238	1.4835	0.145324	0.71252
Dlgap2;S670	Q8BJ42;S670	-0.669706	-1.55052	-1.48268	0.145543	0.712609
Eif3b;S120	Q8JZQ9;S120	-0.495133	1.92436	-1.48284	0.145499	0.712609
Actb;T203	P63260;T203	0.487855	-0.823017	1.47945	0.146401	0.71265
Ank2;S1828	Q8C8R3;S1828	-1.71446	-1.44207	-1.47993	0.146274	0.71265
Gpm6a;S267	P35802;S267	-1.04503	6.68223	-1.48076	0.146051	0.71265
Huwe1;S1395	Q7TMY8;S1395	-0.417782	0.52833	-1.48048	0.146126	0.71265
Huwe1;S3922	Q7TMY8;S3922	-0.542222	0.821949	-1.47957	0.146367	0.71265
Pcbp2;S185	Q61990;S185	0.723877	2.11724	1.48113	0.145954	0.71265
Polr2a;S1878	P08775;S1878	0.484138	-0.821237	1.47926	0.146451	0.71265
Tenm2;S90	Q9WTS5;S90	0.493344	-1.49123	1.47929	0.146442	0.71265
Tenm4;S196	Q3UHK6;S196	-0.594958	0.745684	-1.48077	0.14605	0.71265
Srsf2;S26	Q62093;S26	0.39499	1.26699	1.47819	0.146734	0.71354
Map1a;S2603	Q9QYR6;S2603	-1.77098	0.164907	-1.47713	0.147018	0.714429
Aak1;S622	Q3UHJ0;S622	0.335844	1.13907	1.44907	0.154661	0.715245
Add1;S420	Q9QYC0;S420	-1.25152	1.40128	-1.46942	0.149088	0.715245
Arhgap1;S27	Q5FWK3;S27	-0.850639	-0.0424573	-1.46537	0.150186	0.715245
Bclaf1;S395	Q8K019;S395	-0.367873	1.30576	-1.45644	0.152625	0.715245
Bclaf1;S494	Q8K019;S494	-0.618614	-0.433031	-1.46911	0.149171	0.715245
Begain;T567	Q68EF6;T567	0.590409	-0.465563	1.45869	0.152008	0.715245
Bsn;S980	O88737;S980	-1.31354	0.958065	-1.46406	0.150541	0.715245
Ccdc6;S45	D3YZP9;S45	0.475093	-1.94452	1.45046	0.154277	0.715245
Ccm2;S15	Q8K2Y9;S15	-0.444068	-1.22469	-1.46075	0.151442	0.715245
Cdkl5;S641	Q3UTQ8;S641	0.621218	-1.4869	1.45795	0.152209	0.715245
Cflar;Y452	O35732;Y452	-0.598769	0.0388163	-1.45337	0.153472	0.715245
Clec2l;S47	P0C7M9;S47	0.390461	-1.30308	1.46817	0.149426	0.715245
Dclk1;S355	Q9JLM8;S355	-0.670933	1.67371	-1.45043	0.154285	0.715245
Dmxl2;S2394	Q8BPN8;S2394	0.595327	0.658909	1.45659	0.152584	0.715245
Dpf2;S244	Q61103;S244	0.626024	0.820478	1.46908	0.149181	0.715245
Dpysl4;S540	O35098;S540	1.21516	1.18446	1.47316	0.148082	0.715245
Dync1li2;S411	Q6PDL0;S411	0.529622	0.0370755	1.45706	0.152453	0.715245
Efhd2;S74	Q9D8Y0;S74	0.301042	2.62591	1.47173	0.148467	0.715245
Eif3j1;T114	Q66JS6;T114	0.454415	-1.54071	1.45962	0.151752	0.715245
Eif4enif1;S949	Q9EST3;S949	-0.634615	-1.70851	-1.46522	0.150226	0.715245
Fam117b;T12	Q3U3E2;T12	0.503761	-2.06746	1.45145	0.154001	0.715245
Farp2;S375	Q91VS8;S375	0.396771	-2.01368	1.44859	0.154797	0.715245
Fmnl2;S1015	A2APV2;S1015	0.403135	0.60547	1.45378	0.153359	0.715245
Fnbp1l;S295	Q8K012;S295	-0.30185	0.524126	-1.47135	0.148568	0.715245
Gpm6a;T268	P35802;T268	-0.919949	3.78176	-1.44927	0.154606	0.715245
Grin2a;S882	P35436;S882	0.462851	2.14089	1.4543	0.153213	0.715245
Grin2b;S929	Q01097;S929	-0.80922	1.1799	-1.46074	0.151446	0.715245
Gripap1;S620	Q8VD04;S620	-0.72137	-0.872385	-1.46526	0.150213	0.715245
Gripap1;S657	Q8VD04;S657	-0.960706	2.23192	-1.45011	0.154374	0.715245
Hnrnpd;S82	Q60668;S82	-1.17823	-0.109275	-1.46703	0.149735	0.715245
Iqsec1;S104	Q8R0S2;S104	-0.602894	-1.27358	-1.44953	0.154535	0.715245
Kcnma1;T709	Q08460;T709	-0.461734	-1.71623	-1.46481	0.150336	0.715245
Kif21a;S524	Q9QXL2;S524	0.674	0.981045	1.45482	0.153072	0.715245
Kif3b;S681	Q61771;S681	0.527787	-1.36764	1.47131	0.148578	0.715245
Magi2;S702	Q9WVQ1;S702	-0.611206	-0.444615	-1.4743	0.147774	0.715245
Map1a;S384	Q9QYR6;S384	-1.37219	1.70661	-1.45134	0.154034	0.715245
Map1a;S981	Q9QYR6;S981	-0.58967	4.03278	-1.45842	0.152081	0.715245
Map2;S883	P20357;S883	0.751384	1.60094	1.47261	0.148228	0.715245
Mast1;S1121	Q9R1L5;S1121	0.784227	-1.28873	1.45661	0.152579	0.715245
Mtss1l;S602	Q6P9S0;S602	-0.583093	-1.52349	-1.4683	0.14939	0.715245
Nav1;S380	Q8CH77;S380	-0.573391	-3.1545	-1.46365	0.150652	0.715245
Ncdn;S409	Q9Z0E0;S409	0.391025	-1.33308	1.4511	0.154099	0.715245
Ndrg3;S333	Q9QYF9;S333	0.977894	0.213339	1.4674	0.149635	0.715245
Nefh;S673	P19246;S673	-0.467213	0.742086	-1.46859	0.149311	0.715245
Nefh;S685	P19246;S685	-0.568306	-0.304175	-1.46056	0.151496	0.715245
Nf1;S2517	Q04690;S2517	0.421558	-2.23393	1.45539	0.152915	0.715245
Nolc1;S563	E9Q5C9;S563	-0.630904	0.621551	-1.44852	0.154816	0.715245
Pclo;S1563	Q9QYX7;S1563	-0.458022	2.98242	-1.47473	0.147659	0.715245
Pde11a;T136	P0C1Q2;T136	0.675546	-0.16202	1.45602	0.152741	0.715245
Phactr1;T104	Q2M3X8;T104	1.02057	1.91305	1.45614	0.152707	0.715245
Pitpnm3;S907	Q3UHE1;S907	-0.762389	0.704804	-1.47299	0.148128	0.715245
Ppp1r1b;S192	Q60829;S192	0.385508	1.95622	1.44963	0.154507	0.715245
Prkcb;S11	P68404;S11	0.482783	0.690276	1.47469	0.147672	0.715245
Prrt3;S916	Q6PE13;S916	-1.32836	2.06444	-1.45802	0.15219	0.715245
Psd;S736	Q5DTT2;S736	-1.02104	-0.799748	-1.46318	0.15078	0.715245
Rab12;S105	P35283;S105	-0.652384	-2.06544	-1.46789	0.149503	0.715245
Rasip1;S322	Q3U0S6;S322	0.390718	-3.0787	1.46458	0.1504	0.715245
Rimbp2;S859	Q80U40;S859	-0.619539	-1.25257	-1.47208	0.148371	0.715245
Rplp2;S105	P99027;S105	-1.39884	0.0712101	-1.45702	0.152466	0.715245
Rtn3;S596	Q9ES97;S596	-0.710944	-2.18486	-1.4667	0.149825	0.715245
Scaf1;S682	Q5U4C3;S682	-0.447628	-1.98628	-1.45923	0.151859	0.715245
Sema4d;S782	O09126;S782	-0.310506	-0.935808	-1.47368	0.147942	0.715245
Sgsm1;S232	Q8BPQ7;S232	0.603311	1.31289	1.44991	0.154429	0.715245
Shank3;S897	Q4ACU6;S897	0.871875	0.576726	1.46785	0.149513	0.715245
Slc16a1;T462	P53986;T462	-0.611186	2.05555	-1.45456	0.153142	0.715245
Slc4a3;S67	P16283;S67	0.463783	-0.271085	1.46074	0.151446	0.715245
Slc9a1;S609	Q61165;S609	0.472997	-1.2745	1.45567	0.152837	0.715245
Snap25;S115	P60879;S115	0.410392	-0.804247	1.46318	0.150781	0.715245
Srrm2;S1068	Q8BTI8;S1068	-0.710706	1.56244	-1.44855	0.154807	0.715245
Syn3;S404	Q8JZP2;S404	0.664391	-1.13542	1.45987	0.151683	0.715245
Synpo;S854	Q8CC35;S854	0.392373	-0.703442	1.47128	0.148586	0.715245
Tanc2;S1583	A2A690;S1583	0.35658	2.98475	1.47089	0.14869	0.715245
Tjp1;S212	P39447;S212	-0.418084	-2.00009	-1.46867	0.14929	0.715245
Tmem100;S121	Q9CQG9;S121	0.454608	0.510009	1.45701	0.152468	0.715245
Tmpo;S183	Q61029;S183	-0.625929	1.62917	-1.46043	0.151531	0.715245
Tsc2;S664	Q61037;S664	0.409621	-2.257	1.4598	0.151702	0.715245
Cdk18;S75	Q04899;S75	-0.549998	-0.924003	-1.44792	0.154981	0.715542
Dpysl4;S544	O35098;S544	-1.11335	0.238039	-1.4472	0.155182	0.715543
Ppfia3;S508	P60469;S508	0.371934	0.562598	1.44751	0.155096	0.715543
Ate1;S166	Q9Z2A5;S166	0.616375	-0.73282	1.44679	0.155298	0.715615
Hnrnpa3;S359	Q8BG05;S359	0.349896	3.55578	1.44538	0.15569	0.716505
Syngap1;S1005	F6SEU4;S1005	0.92581	3.51185	1.44537	0.155692	0.716505
Prkci;T563	Q62074;T563	-0.525445	-0.978773	-1.44476	0.155863	0.71683
Denr;S73	Q9CQJ6;S73	-0.558701	2.99258	-1.44271	0.156437	0.717743
Gatad2b;S136	Q8VHR5;S136	-0.585856	-1.99766	-1.44261	0.156465	0.717743
Map7;S209	O88735;S209	-0.503402	-0.00992755	-1.44296	0.156368	0.717743
Sik3;S493	Q6P4S6;S493	0.434205	1.19953	1.44348	0.15622	0.717743
Atp2b2;T1117	Q9R0K7;T1117	0.6429	3.98176	1.43983	0.157246	0.718306
Caskin1;S893	Q6P9K8;S893	-0.970243	0.980767	-1.43992	0.157221	0.718306
Cttn;S417	Q60598;S417	-0.823354	4.86512	-1.44174	0.156709	0.718306
Dpysl2;T241	O08553;T241	-0.321069	-1.86412	-1.43966	0.157293	0.718306
Rims1;S252	Q99NE5;S252	0.684565	0.862643	1.44056	0.157041	0.718306
Shc3;S282	Q61120;S282	-0.622881	-0.762501	-1.44031	0.157111	0.718306
Srrm2;S1284	Q8BTI8;S1284	0.838709	-1.74698	1.44016	0.157153	0.718306
Map1b;S829	P14873;S829	-0.981995	2.99466	-1.43917	0.157433	0.718484
Cacna1e;S793	Q61290;S793	0.554898	0.310659	1.43554	0.158458	0.719076
Cacng3;S248	Q9JJV5;S248	-0.627642	-0.700674	-1.43714	0.158006	0.719076
Cflar;S467	O35732;S467	-0.62666	-0.00354101	-1.43694	0.158062	0.719076
Ctnnd2;S529	O35927;S529	-0.811702	0.627724	-1.43683	0.158092	0.719076
Matr3;S598	Q8K310;S598	-1.80647	-0.545839	-1.43717	0.157996	0.719076
Pclo;S4358	Q9QYX7;S4358	0.653334	0.162177	1.43817	0.157715	0.719076
Sptbn1;T2194	Q62261;T2194	0.43256	-0.576002	1.43549	0.158471	0.719076
Srrm2;S2646	Q8BTI8;S2646	-0.42522	-1.8221	-1.43639	0.158218	0.719076
Zbtb18;S321	Q9WUK6;S321	0.503424	-0.812748	1.43552	0.158463	0.719076
Prkce;S388	P16054;S388	0.292156	4.72868	1.43495	0.158625	0.719315
Adcy2;S471	Q80TL1;S471	-0.644206	-0.851057	-1.43157	0.159586	0.71958
Akt1s1;T247	Q9D1F4;T247	-0.580832	-0.590355	-1.42841	0.160487	0.71958
Atp2b2;S1155	Q9R0K7;S1155	-1.23355	2.26734	-1.43238	0.159354	0.71958
Atxn2;S836	O70305;S836	0.633987	-2.90334	1.42524	0.161395	0.71958
Bcl9;T257	Q9D219;T257	-0.468705	-1.06504	-1.42028	0.162825	0.71958
Bsn;S2647	O88737;S2647	-0.729797	0.988513	-1.42326	0.161966	0.71958
C2cd2l;T417	Q80X80;T417	0.374155	3.36275	1.424	0.161752	0.71958
Cacna1a;S1981	P97445;S1981	-0.463785	-0.56393	-1.4235	0.161897	0.71958
Cacng7;S273	P62956;S273	0.391507	-0.913399	1.43392	0.158916	0.71958
Caskin1;S423	Q6P9K8;S423	0.61148	0.552228	1.42567	0.161273	0.71958
Cflar;Y464	O35732;Y464	-0.6168	0.0114469	-1.43288	0.159214	0.71958
Clmp;T316	Q8R373;T316	-0.476477	-2.76549	-1.42106	0.162601	0.71958
Dlg1;S619	Q811D0;S619	-0.530034	-2.77695	-1.42037	0.162799	0.71958
Dlg4;S418	Q62108;S418	-0.72439	-1.55724	-1.42477	0.161531	0.71958
Dlgap1;S605	Q9D415;S605	0.573701	-0.173118	1.4211	0.162589	0.71958
Fbxo42;S365	Q6PDJ6;S365	0.556144	-0.0419428	1.42284	0.162088	0.71958
Hopx;S66	Q8R1H0;S66	0.36084	-1.2925	1.42113	0.162581	0.71958
Jph4;S157	Q80WT0;S157	0.427098	0.315007	1.42108	0.162596	0.71958
Kiaa0195;S221	Q7TSH8;S221	-0.616965	0.223136	-1.4208	0.162675	0.71958
Map1a;S991	Q9QYR6;S991	0.61448	6.24719	1.42997	0.160041	0.71958
Mapk8;Y185	Q91Y86;Y185	0.792076	1.765	1.43117	0.1597	0.71958
Mef2a;S253	Q60929;S253	0.63463	-0.579789	1.42661	0.161004	0.71958
Mfap4;S206	Q9D1H9;S206	-0.391112	1.84101	-1.42696	0.160903	0.71958
Mtmr6;S557	Q8VE11;S557	0.437838	-0.918741	1.4241	0.161724	0.71958
Nbea;S1252	Q9EPN1;S1252	0.659676	-1.01789	1.43144	0.159623	0.71958
Ncam1;S943	P13595;S943	0.651167	-0.08011	1.43336	0.159075	0.71958
Nefm;S723	P08553;S723	-0.70071	0.588349	-1.42549	0.161324	0.71958
Nfasc;S1231	Q810U3;S1231	-0.690833	-0.450964	-1.42943	0.160195	0.71958
Npm1;S125	Q61937;S125	-0.719627	2.92366	-1.42848	0.160469	0.71958
Pclo;S615	Q9QYX7;S615	0.646969	0.852223	1.42795	0.160619	0.71958
Pde7a;S58	P70453;S58	-0.4067	-0.967958	-1.42881	0.160374	0.71958
Prkaca;T198	P05132;T198	-1.28943	0.728716	-1.43092	0.159772	0.71958
Pum2;S181	Q80U58;S181	0.357079	0.0761406	1.42434	0.161655	0.71958
Rims1;S790	Q99NE5;S790	-1.24718	-1.93942	-1.42502	0.16146	0.71958
Slc38a7;S28	Q8BWH0;S28	0.471736	-1.36663	1.42818	0.160554	0.71958
Slc4a1;S18	P04919;S18	-0.44573	-0.468766	-1.42117	0.16257	0.71958
Sorbs2;T357	Q3UTJ2;T357	-0.566985	0.341553	-1.4265	0.161036	0.71958
Specc1;S914	Q5SXY1;S914	0.992175	0.132258	1.43314	0.159138	0.71958
Tnks1bp1;S713	P58871;S713	0.378996	-0.184025	1.42717	0.160843	0.71958
Tuba1b;T223	P05213;T223	0.45355	-0.859439	1.43205	0.159449	0.71958
Vcpip1;S746	Q8CDG3;S746	-0.582343	-0.473284	-1.42724	0.160822	0.71958
Prrt2;T78	E9PUL5;T78	-1.22101	3.08295	-1.41972	0.162989	0.719861
Prrt3;S965	Q6PE13;S965	0.574753	-0.877068	1.41895	0.16321	0.719943
Tsc1;S592	Q9EP53;S592	-0.700955	-0.123822	-1.41917	0.163148	0.719943
Asap1;S732	Q9QWY8;S732	-0.683843	1.54621	-1.41807	0.163466	0.720093
Map2;S1136	P20357;S1136	-0.803314	1.99421	-1.41756	0.163616	0.720093
Pde7b;S426	Q9QXQ1;S426	-2.0517	0.539793	-1.41734	0.16368	0.720093
Snap91;T309	Q61548;T309	-0.852211	2.50336	-1.4171	0.163749	0.720093
Wdr44;S50	Q6NVE8;S50	0.412149	-0.309404	1.41848	0.163348	0.720093
Ank2;T2232	Q8C8R3;T2232	-0.525261	1.03025	-1.41658	0.163898	0.720303
Rab12;S15	P35283;S15	0.389891	0.889829	1.41518	0.164306	0.720762
Scfd1;S300	Q8BRF7;S300	0.47976	-0.181702	1.41534	0.164261	0.720762
Tjp2;S239	Q9Z0U1;S239	0.457757	2.66448	1.41532	0.164265	0.720762
Arhgef19;S574	Q8BWA8;S574	0.533422	1.5908	1.41238	0.165124	0.721643
Atp2b2;S19	Q9R0K7;S19	0.498765	2.12345	1.41374	0.164727	0.721643
Kif21b;S1150	Q9QXL1;S1150	0.547545	-1.99609	1.41082	0.165581	0.721643
Ncoa7;S682	Q6DFV7;S682	0.453825	-0.947738	1.40999	0.165824	0.721643
Nefh;S613	P19246;S613	-0.582365	2.8947	-1.41209	0.165208	0.721643
Nefh;S727	P19246;S727	-0.527381	1.82707	-1.41017	0.165772	0.721643
Nmt1;S31	O70310;S31	0.552334	1.5697	1.41166	0.165335	0.721643
Pcsk1n;S204	Q9QXV0;S204	-0.527252	-0.202209	-1.41324	0.164873	0.721643
Plch2;S662	A2AP18;S662	-0.516006	-0.537787	-1.41266	0.165041	0.721643
Sept5;T13	Q9Z2Q6;T13	-0.453535	1.65664	-1.41135	0.165425	0.721643
Slc2a13;S17	Q3UHK1;S17	0.441209	-1.94733	1.41165	0.165339	0.721643
Tanc2;S404	A2A690;S404	-0.646298	-0.240552	-1.41044	0.165691	0.721643
Zranb2;S120	Q9R020;S120	0.873818	2.08686	1.41344	0.164813	0.721643
Bsn;S121	O88737;S121	-1.67008	-1.73289	-1.40927	0.166036	0.721686
Stmn2;S62	P55821;S62	0.399718	2.14518	1.40935	0.166011	0.721686
Tceal5;S23	Q8CCT4;S23	-0.632489	-1.23711	-1.40882	0.166167	0.721813
Arhgef17;S219	Q80U35;S219	0.54703	0.20426	1.40702	0.166698	0.722563
Shc3;S354	Q61120;S354	-0.699821	0.596095	-1.40686	0.166745	0.722563
Sphkap;S1070	Q6NSW3;S1070	-0.54701	-0.814005	-1.40763	0.166518	0.722563
Tppp;S19	Q7TQD2;S19	-0.545129	4.8334	-1.40688	0.166738	0.722563
Brd3;S262	Q8K2F0;S262	0.372672	-0.388425	1.40645	0.166864	0.722639
Amph;S518	Q7TQF7;S518	1.173	2.35197	1.40429	0.167503	0.722653
C2cd2l;S466	Q80X80;S466	-0.784675	3.15569	-1.4042	0.16753	0.722653
Epb41l3;S547	Q9WV92;S547	-0.554559	-0.472534	-1.40565	0.167101	0.722653
Purg;S342	Q8R4E6;S342	-0.834691	0.718281	-1.40429	0.167504	0.722653
Rbm10;S718	Q99KG3;S718	0.455229	-0.0280463	1.40404	0.167578	0.722653
Sntb1;S86	Q99L88;S86	-0.507435	0.255102	-1.40541	0.167171	0.722653
Wipf3;S161	P0C7L0;S161	0.967998	0.826307	1.40514	0.167251	0.722653
Mprip;S292	P97434;S292	-0.654196	0.123718	-1.40301	0.167884	0.723535
Prrt3;S845	Q6PE13;S845	0.694787	2.81921	1.40227	0.168102	0.724036
Gpi;T109	P06745;T109	0.497597	-2.26718	1.40158	0.168307	0.724268
Map1a;S319	Q9QYR6;S319	-2.10079	-1.47991	-1.4014	0.168359	0.724268
Arhgap35;S985	Q91YM2;S985	-0.573622	0.489395	-1.39922	0.169007	0.724432
Atxn2l;S333	Q7TQH0;S333	-0.629656	-0.30192	-1.39951	0.168921	0.724432
Gap43;S142	P06837;S142	-0.314141	6.53887	-1.40024	0.168704	0.724432
Mark1;S423	Q8VHJ5;S423	0.310046	-2.39508	1.40034	0.168674	0.724432
Nfic;S323	P70255;S323	0.748462	-3.36041	1.40036	0.168668	0.724432
Ssfa2;S738	Q922B9;S738	0.523545	-1.72105	1.39958	0.168902	0.724432
Sowaha;S124	Q8BLS7;S124	0.580616	0.927809	1.39876	0.169145	0.724589
Mapt;T509	P10637;T509	0.3795	2.57813	1.39834	0.16927	0.724685
Kcna4;S586	Q61423;S586	-0.573466	-0.876305	-1.39708	0.169646	0.725859
Kctd16;S146	Q5DTY9;S146	-0.387739	0.603293	-1.39673	0.169753	0.725881
Dclk1;S330	Q9JLM8;S330	0.459008	1.05246	1.39506	0.170251	0.726634
Mink1;S677	Q9JM52;S677	0.435608	2.77614	1.39511	0.170237	0.726634
Ppm1h;S123	Q3UYC0;S123	0.4582	-0.268183	1.39477	0.170337	0.726634
Prkar2b;S112	P31324;S112	-0.259203	5.38142	-1.39507	0.170248	0.726634
Acin1;S413	Q9JIX8;S413	-0.605652	-2.27994	-1.38874	0.172152	0.72698
Arhgap23;S607	Q69ZH9;S607	0.94614	-1.69036	1.38614	0.172938	0.72698
Atp2b2;S1156	Q9R0K7;S1156	0.825827	2.21022	1.38467	0.173384	0.72698
Bcl2l13;T342	P59017;T342	0.868673	3.22361	1.38388	0.173626	0.72698
Cacna1a;S450	P97445;S450	-0.445934	-1.08443	-1.39233	0.17107	0.72698
Clip1;S353	Q9Z0H8;S353	0.717803	0.958283	1.38726	0.172599	0.72698
Dbn1;S344	Q9QXS6;S344	-0.925012	2.9586	-1.38786	0.172418	0.72698
Dlgap1;S509	Q9D415;S509	-0.495128	2.5798	-1.38396	0.173601	0.72698
Kbtbd11;S186	Q8BNW9;S186	0.557245	-2.68763	1.38715	0.172632	0.72698
Kcnj3;S385	P63250;S385	-0.250875	1.2028	-1.3938	0.170627	0.72698
Limk1;S154	P53668;S154	0.531471	-0.769143	1.38637	0.172868	0.72698
Nav1;S531	Q8CH77;S531	0.481376	-0.269521	1.3878	0.172436	0.72698
Nbea;S1519	Q9EPN1;S1519	0.630929	3.69061	1.38468	0.173381	0.72698
Ncl;S403	P09405;S403	-0.54842	-2.72294	-1.39258	0.170994	0.72698
Pclo;S3549	Q9QYX7;S3549	0.324582	0.793247	1.39146	0.171331	0.72698
Ppp6r2;S820	Q8R3Q2;S820	-0.468871	1.02788	-1.39146	0.171332	0.72698
Rab3c;S211	P62823;S211	-0.39593	1.18555	-1.38379	0.173653	0.72698
Rplp2;S102	P99027;S102	-1.3309	0.0583627	-1.38369	0.173683	0.72698
Sde2;S269	Q8K1J5;S269	0.376619	-0.980355	1.38446	0.17345	0.72698
Sgip1;S142	Q8VD37;S142	0.609361	0.0813187	1.38803	0.172368	0.72698
Sik3;T1048	Q6P4S6;T1048	-0.532696	-0.658944	-1.38578	0.173049	0.72698
Sptbn1;S2164	Q62261;S2164	-1.14594	3.23082	-1.39279	0.170933	0.72698
Stmn1;S16	P54227;S16	0.450889	1.98845	1.39149	0.171321	0.72698
Supt6h;S1535	Q62383;S1535	-0.432004	-2.6863	-1.38582	0.173037	0.72698
Synpo;S507	Q8CC35;S507	-0.658106	0.621025	-1.39039	0.171654	0.72698
Tanc1;S1665	Q0VGY8;S1665	-0.399983	0.255187	-1.3937	0.17066	0.72698
Tmem55a;S33	Q9CZX7;S33	0.683944	0.450169	1.38684	0.172726	0.72698
Tnks1bp1;S1373	P58871;S1373	-0.693182	-1.27436	-1.38613	0.172941	0.72698
Tp53bp1;S1096	P70399;S1096	0.519041	1.04477	1.38613	0.172942	0.72698
Tp53bp1;S268	P70399;S268	-0.537763	1.75403	-1.39103	0.171461	0.72698
Tprg1l;T34	Q9DBS2;T34	0.337046	5.31646	1.38462	0.1734	0.72698
Vdac1;S117	Q60932;S117	0.428031	-0.288403	1.3867	0.17277	0.72698
Epb41l3;S96	Q9WV92;S96	-0.74033	2.0608	-1.38327	0.17381	0.727084
Fundc1;S13	Q9DB70;S13	-0.534947	0.42221	-1.38274	0.173973	0.72734
Kcnab1;T54	P63143;T54	0.595094	-1.04992	1.3823	0.174106	0.727468
Atp5b;T285	P56480;T285	-0.399532	-3.07989	-1.38104	0.174492	0.727797
Dpysl2;T521	O08553;T521	0.946505	3.54814	1.38127	0.174422	0.727797
Shank1;S1539	D3YZU1;S1539	0.469586	1.2139	1.38167	0.174299	0.727797
Gap43;S41	P06837;S41	-1.39177	5.13982	-1.37996	0.174819	0.727886
Nrgn;S36	P60761;S36	-1.39177	5.13511	-1.38019	0.17475	0.727886
Snap25;S154	P60879;S154	-0.40126	-2.42349	-1.38057	0.174634	0.727886
Cpd;T1365	O89001;T1365	-0.516116	-0.676899	-1.37782	0.175476	0.729753
Grm1;T871	P97772;T871	-0.595882	-2.08987	-1.37688	0.175764	0.729753
Llgl1;S986	Q80Y17;S986	0.49101	0.56251	1.37621	0.175972	0.729753
Nefh;S541	P19246;S541	-0.66345	0.983419	-1.37746	0.175588	0.729753
Ppp3ca;T427	P63328;T427	0.434564	-1.65362	1.37616	0.175985	0.729753
Reep1;S152	Q8BGH4;S152	1.25183	-0.317529	1.37647	0.17589	0.729753
U2af2;S79	P26369;S79	-0.973714	1.5788	-1.37654	0.17587	0.729753
Bcan;S414	Q61361;S414	0.801154	0.428543	1.37367	0.176751	0.730511
Grasp;T76	Q9JJA9;T76	0.540344	-1.39298	1.37432	0.176553	0.730511
Gsk3b;S9	Q9WV60;S9	0.710899	2.53335	1.37464	0.176455	0.730511
Ndrg2;T348	Q9QYG0;T348	-0.613936	2.28499	-1.37398	0.176655	0.730511
Sept7;S333	O55131;S333	-0.374	0.403893	-1.37357	0.176783	0.730511
Sh3pxd2b;S528	A2AAY5;S528	0.880274	-2.47391	1.3737	0.176744	0.730511
Ksr1;S392	Q61097;S392	0.35644	2.07639	1.37279	0.177023	0.730657
Rapgef2;T1118	Q8CHG7;T1118	-0.494144	-0.351225	-1.37282	0.177013	0.730657
Nf1;S2804	Q04690;S2804	-0.485951	-0.753538	-1.37214	0.177225	0.731065
Wdr77;T5	Q99J09;T5	0.335459	1.10125	1.37103	0.177568	0.732055
Add3;S42	Q9QYB5;S42	-0.597338	-1.40617	-1.3663	0.179035	0.733006
C2cd2l;T621	Q80X80;T621	0.767352	0.457362	1.36527	0.179357	0.733006
Epb41l1;T475	Q9Z2H5;T475	-1.24448	-0.810224	-1.36776	0.178581	0.733006
Gfap;S382	P03995;S382	0.661063	-2.93197	1.36566	0.179234	0.733006
Git1;T508	Q68FF6;T508	-0.659041	-4.11514	-1.36499	0.179445	0.733006
Hcn2;S134	O88703;S134	-0.370123	-2.7527	-1.36541	0.179314	0.733006
Hnrnpul1;S195	Q8VDM6;S195	0.414027	0.286605	1.36682	0.178875	0.733006
Kcnh7;S174	Q9ER47;S174	0.391465	-1.18303	1.36848	0.178358	0.733006
Kcnj3;S442	P63250;S442	-0.598418	-0.335067	-1.36607	0.179108	0.733006
Lrfn4;S627	Q80XU8;S627	-0.421717	-0.578303	-1.36664	0.178931	0.733006
Map6;S86	Q7TSJ2;S86	-0.821756	1.69948	-1.36759	0.178635	0.733006
Mtmr1;T663	Q9Z2C4;T663	0.430598	0.468617	1.36689	0.178852	0.733006
Nefh;S535	P19246;S535	-0.660203	0.97855	-1.36584	0.179179	0.733006
Scg2;S270	Q03517;S270	-1.14371	-1.17943	-1.36869	0.178291	0.733006
Spg20;S126	Q8R1X6;S126	-0.415235	1.54029	-1.36641	0.179002	0.733006
Zdhhc5;S274	Q8VDZ4;S274	-0.756905	0.861995	-1.36787	0.178548	0.733006
Smap;S17	Q9R0P4;S17	-1.37305	2.92177	-1.36454	0.179585	0.733158
Bsn;S105	O88737;S105	-0.68932	-1.7092	-1.35758	0.181767	0.73385
Ccdc132;S494	Q8CI71;S494	0.494686	1.25198	1.36165	0.180488	0.73385
Cep170b;S709	Q80U49;S709	0.414757	-1.48314	1.36078	0.18076	0.73385
Chgb;Y348	P16014;Y348	-0.419588	3.79405	-1.36133	0.18059	0.73385
Dlgap2;S811	Q8BJ42;S811	0.675153	0.93584	1.35678	0.18202	0.73385
Dmxl2;S451	Q8BPN8;S451	-0.623241	1.70227	-1.35703	0.181941	0.73385
Dock4;S1608	P59764;S1608	-0.949117	1.55672	-1.3572	0.181886	0.73385
Elavl4;S233	Q61701;S233	0.654932	-1.55071	1.36281	0.180124	0.73385
Epm2aip1;S147	Q8VEH5;S147	-0.543163	-2.44153	-1.36307	0.180043	0.73385
Map2;T1609	P20357;T1609	0.898382	6.56067	1.35707	0.181929	0.73385
Map3k2;S331	Q61083;S331	0.497016	-0.353441	1.35881	0.18138	0.73385
Mink1;S750	Q9JM52;S750	0.356937	1.37734	1.35952	0.181157	0.73385
Mpp3;S517	O88910;S517	-0.404042	-1.08506	-1.35734	0.181843	0.73385
Mycbp2;S2943	Q7TPH6;S2943	-0.441278	-0.232924	-1.36241	0.18025	0.73385
Nos1;S293	Q9Z0J4;S293	0.597399	-0.34244	1.3621	0.180346	0.73385
Nsmf;S72	Q99NF2;S72	-0.874019	-0.484774	-1.35752	0.181787	0.73385
Pllp;S9	Q9DCU2;S9	0.361889	-0.899168	1.35978	0.181074	0.73385
Slc3a2;S58	P10852;S58	0.874746	-1.98376	1.35688	0.181989	0.73385
Snph;S204	Q80U23;S204	0.358462	2.10295	1.3596	0.18113	0.73385
Tanc1;S310	Q0VGY8;S310	0.430794	0.499981	1.35783	0.181689	0.73385
Tpmt;S2	O55060;S2	0.391496	-0.995851	1.36012	0.180968	0.73385
Ubap1;S146	Q8BH48;S146	-0.554553	-1.06395	-1.35808	0.181609	0.73385
Cyb5b;T3	Q9CQX2;T3	0.536906	0.18678	1.35499	0.182584	0.733959
Dnajc6;S481	Q80TZ3;S481	-0.576565	5.13644	-1.35463	0.1827	0.733959
Epb41l1;S443	Q9Z2H5;S443	-0.659421	0.496442	-1.35248	0.183379	0.733959
Kiaa1211;S409	Q5PR69;S409	-0.693928	-0.760063	-1.35195	0.183547	0.733959
Mapk8ip3;S1192	Q9ESN9;S1192	0.386899	3.28257	1.35522	0.182511	0.733959
Marcks;S112	P26645;S112	0.487807	2.63363	1.35385	0.182947	0.733959
Mark2;T208	Q05512;T208	-0.406833	2.34584	-1.35571	0.182358	0.733959
Mfap4;S205	Q9D1H9;S205	-0.377924	1.83426	-1.352	0.183531	0.733959
Nop56;S543	Q9D6Z1;S543	-0.401079	0.0284135	-1.3532	0.183151	0.733959
Pebp1;T42	P70296;T42	0.620001	-0.278889	1.35438	0.182778	0.733959
Rps6ka1;S221	P18653;S221	0.445221	-1.74855	1.35181	0.183593	0.733959
Slain2;S414	Q8CI08;S414	0.334031	-2.67766	1.35356	0.183036	0.733959
Srcin1;S233	Q9QWI6;S233	0.467244	4.07635	1.35293	0.183236	0.733959
Synrg;S1067	Q5SV85;S1067	0.368581	-3.04839	1.35591	0.182293	0.733959
Triobp;S1603	Q99KW3;S1603	0.520487	-2.10354	1.35588	0.182303	0.733959
Ank2;T3739	Q8C8R3;T3739	0.589968	2.81791	1.3503	0.184071	0.734572
Arhgap39;S683	P59281;S683	0.454249	2.82313	1.34943	0.184348	0.734572
Arhgef19;T567	Q8BWA8;T567	0.533422	1.57047	1.34996	0.184179	0.734572
Bsn;S2866	O88737;S2866	0.288876	3.8711	1.34884	0.184538	0.734572
Grip1;S995	Q925T6;S995	0.464747	-0.555638	1.34945	0.184343	0.734572
Lgalsl;S25	Q8VED9;S25	0.381874	4.16062	1.34873	0.184571	0.734572
Lrrc8b;S215	Q5DU41;S215	0.441264	-0.220082	1.34922	0.184414	0.734572
Psma3;S215	O70435;S215	-0.437189	-0.667661	-1.35046	0.184022	0.734572
Arhgap5;S765	P97393;S765	0.341047	-2.2833	1.34575	0.185522	0.735023
Asap1;T1066	Q9QWY8;T1066	-0.660257	-0.944853	-1.3475	0.184963	0.735023
Ccdc28b;S46	Q8CEG5;S46	0.409091	-2.4822	1.34683	0.185179	0.735023
Crmp1;S495	P97427;S495	0.418745	0.0252225	1.34626	0.185361	0.735023
Dzank1;S768	Q8C008;S768	-0.4912	-1.07985	-1.34515	0.185716	0.735023
Htt;S396	P42859;S396	0.496292	-2.3185	1.34541	0.185634	0.735023
Pclo;S3506	Q9QYX7;S3506	-0.80624	-0.331151	-1.34549	0.185606	0.735023
Smim13;S59	E9Q942;S59	-0.549825	0.721104	-1.3466	0.185251	0.735023
Tbc1d25;S560	A1A5B6;S560	0.826476	-1.94122	1.34788	0.184843	0.735023
Tuba1b;T361	P05213;T361	0.304897	0.0873921	1.34645	0.185298	0.735023
Map1b;S1911	P14873;S1911	0.255002	4.31234	1.34368	0.186187	0.736068
Scn1a;S568	B1AWN6;S568	0.518743	-0.198059	1.34369	0.186185	0.736068
Atp8a1;S1124	P70704;S1124	-0.814796	0.662368	-1.34108	0.187023	0.736862
Cacna1e;S2073	Q61290;S2073	-0.351506	2.07601	-1.34223	0.186654	0.736862
Caskin1;T1031	Q6P9K8;T1031	-0.591725	1.50387	-1.34103	0.187039	0.736862
Dnajc6;S478	Q80TZ3;S478	-0.633517	4.9605	-1.3408	0.187112	0.736862
Mef2d;S251	Q63943;S251	0.386682	2.01351	1.34177	0.1868	0.736862
Pfkfb2;S486	P70265;S486	0.331275	1.28931	1.34106	0.18703	0.736862
Tmem55a;S18	Q9CZX7;S18	0.611446	-0.776705	1.34134	0.186938	0.736862
Camsap1;S415	A2AHC3;S415	0.506682	-3.07186	1.33859	0.187826	0.738312
Larp1;S743	Q6ZQ58;S743	-0.695243	0.175201	-1.33838	0.187894	0.738312
Ptprn2;S423	P80560;S423	-0.787988	1.83618	-1.33859	0.187825	0.738312
Skt;S326	A2AQ25;S326	0.581613	0.035216	1.33886	0.18774	0.738312
Ccdc132;S559	Q8CI71;S559	-0.452596	1.33654	-1.33674	0.188423	0.738754
Clip1;S194	Q922J3;S194	0.410849	-0.145305	1.33538	0.188865	0.738754
Dlgap4;S421	B1AZP2;S421	-0.438508	-1.09956	-1.33732	0.188236	0.738754
Dmxl2;T2017	Q8BPN8;T2017	-0.938977	0.347126	-1.33467	0.189096	0.738754
Epb41l1;T685	Q9Z2H5;T685	-0.793993	2.33181	-1.33479	0.189056	0.738754
Esyt2;S685	Q3TZZ7;S685	-0.607953	-1.21021	-1.33451	0.189148	0.738754
Gja1;S306	P23242;S306	0.504358	2.70252	1.33697	0.18835	0.738754
Jph4;S222	Q80WT0;S222	0.380751	-2.86515	1.33613	0.188621	0.738754
Map1a;S644	Q9QYR6;S644	0.741537	1.98586	1.33668	0.188443	0.738754
Tcf4;S92	Q60722;S92	0.44379	-1.71583	1.33546	0.188839	0.738754
Tuba4a;T337	P68368;T337	0.45733	-1.9211	1.33508	0.188964	0.738754
Ckb;T35	Q04447;T35	0.341068	-0.746607	1.33223	0.189889	0.739508
Dapk3;S316	O54784;S316	-0.298632	-1.57572	-1.332	0.189963	0.739508
Irs2;S675	P81122;S675	0.550054	-0.883136	1.33218	0.189906	0.739508
Kcnc2;S557	Q14B80;S557	0.514487	-0.267788	1.33263	0.18976	0.739508
Tmem151a;S423	Q6GQT5;S423	-0.369533	-2.60498	-1.33261	0.189767	0.739508
Tmem25;T316	Q9DCF1;T316	0.502889	-0.877639	1.33238	0.189841	0.739508
Ssbp3;S347	Q9D032;S347	0.448588	-2.04088	1.33157	0.190105	0.739656
Cntn1;Y583	P12960;Y583	-0.443644	-0.0380811	-1.32894	0.190964	0.740109
Hnrnpul2;S159	Q00PI9;S159	-0.585979	-0.605701	-1.32962	0.19074	0.740109
Ncam2;S765	O35136;S765	0.61687	2.10779	1.33	0.190618	0.740109
Nefh;S745	P19246;S745	0.668615	0.364733	1.32872	0.191034	0.740109
Pip4k2b;T322	Q80XI4;T322	0.472585	0.472283	1.32925	0.190861	0.740109
Rasgrp1;S794	Q9Z1S3;S794	-0.389438	-0.476477	-1.32867	0.191053	0.740109
Wdfy1;S408	E9Q4P1;S408	0.464333	-3.48417	1.32957	0.190757	0.740109
Zfhx3;T671	Q61329;T671	0.470126	-0.221629	1.32975	0.190698	0.740109
Map1s;T571	Q8C052;T571	-0.611077	0.292795	-1.32812	0.19123	0.740394
Irs2;T517	P81122;T517	0.396536	-0.167098	1.32497	0.192266	0.742275
Kctd12;S189	Q6WVG3;S189	0.541521	-0.260775	1.32596	0.191941	0.742275
Map7d2;S357	A2AG50;S357	0.270919	2.94935	1.32531	0.192154	0.742275
Rnmt;S15	Q9D0L8;S15	0.277603	1.80346	1.32442	0.192445	0.742275
Safb;S626	D3YXK2;S626	-0.537762	-0.318962	-1.32455	0.192403	0.742275
Speg;S2135	Q62407;S2135	0.398785	0.574346	1.3261	0.191893	0.742275
Sphkap;S1574	Q6NSW3;S1574	-0.43264	-0.520306	-1.32542	0.192117	0.742275
Add2;S692	Q9QYB8;S692	0.506533	1.79075	1.32348	0.192757	0.742614
Dpysl5;T509	Q9EQF6;T509	-0.405775	3.46272	-1.32286	0.19296	0.742614
Ksr1;T256	Q61097;T256	0.369786	1.04401	1.32215	0.193196	0.742614
Mbp;T149	P04370;T149	0.508563	1.60851	1.3223	0.193147	0.742614
Mmgt1;S120	Q8K273;S120	0.421374	-1.81371	1.32245	0.193095	0.742614
Sgsm1;S646	Q8BPQ7;S646	0.502427	0.0095694	1.32367	0.192692	0.742614
Tomm20;S135	Q9DCC8;S135	0.430425	-0.736751	1.32163	0.193367	0.742614
Wasf1;S310	Q8R5H6;S310	0.544377	3.2715	1.32171	0.193341	0.742614
Caskin1;S1036	Q6P9K8;S1036	0.447779	1.218	1.32059	0.193709	0.74333
Oxr1;S204	Q4KMM3;S204	-1.77356	2.49647	-1.32043	0.193762	0.74333
Aqp4;T289	P55088;T289	-0.956611	0.34328	-1.31938	0.19411	0.743462
Fnbp1l;S488	Q8K012;S488	-0.569208	1.46438	-1.31966	0.194017	0.743462
Gprin3;S327	Q8BWS5;S327	0.458584	1.28467	1.32	0.193906	0.743462
Atp2b2;T1143	Q9R0K7;T1143	-0.622853	0.3129	-1.31728	0.194809	0.743664
Cntnap2;S1307	Q9CPW0;S1307	-0.468038	-0.123793	-1.31729	0.194806	0.743664
Gm996;S448	A2AJA9;S448	-0.260287	-0.518679	-1.3179	0.194601	0.743664
Ppfia3;S142	P60469;S142	0.358858	0.647365	1.31723	0.194825	0.743664
Ptpn12;S448	P35831;S448	0.505243	-0.252694	1.31866	0.19435	0.743664
Srrm2;S1276	Q8BTI8;S1276	-1.6831	1.06065	-1.31812	0.194528	0.743664
Suds3;S234	Q8BR65;S234	0.449732	0.957958	1.31702	0.194893	0.743664
Atp6v1h;S59	Q8BVE3;S59	-0.477513	-1.1229	-1.31467	0.195676	0.744307
Bin1;S296	O08539;S296	-0.281504	4.97982	-1.31599	0.195238	0.744307
Git1;S507	Q68FF6;S507	-0.626781	-4.07779	-1.31481	0.195631	0.744307
Mboat2;S472	Q8R3I2;S472	-0.990988	0.459444	-1.31543	0.195425	0.744307
Mical3;S1736	Q8CJ19;S1736	-0.549047	-0.683461	-1.31481	0.19563	0.744307
Snx27;S49	Q3UHD6;S49	0.338778	1.68572	1.31463	0.195689	0.744307
Epb41l2;S193	O70318;S193	0.427101	-1.36839	1.31406	0.195879	0.74445
Kcnj6;S25	P48542;S25	0.541074	0.649904	1.31389	0.195935	0.74445
Rims1;S217	Q99NE5;S217	-0.454095	2.11161	-1.31295	0.19625	0.745248
Amph;S500	Q7TQF7;S500	0.571459	5.09206	1.31179	0.196636	0.745428
Atrx;S92	Q61687;S92	-0.475167	1.25287	-1.31046	0.197083	0.745428
Gas2l1;S316	Q8JZP9;S316	0.391762	1.59014	1.31113	0.196858	0.745428
Kif1a;S1533	P33173;S1533	0.693602	2.55615	1.31228	0.196474	0.745428
Mark1;T215	Q8VHJ5;T215	-0.402758	2.34093	-1.30988	0.197278	0.745428
Pclo;S1709	Q9QYX7;S1709	-0.605916	3.35303	-1.3105	0.197069	0.745428
Ppp1r2;S122	Q9DCL8;S122	-0.58081	-0.159175	-1.31121	0.196831	0.745428
Prkaca;S339	P05132;S339	0.395697	0.0953339	1.30968	0.197344	0.745428
Slc6a17;S686	Q8BJI1;S686	0.494247	1.2762	1.31142	0.196761	0.745428
Tusc2;S50	Q9WVF8;S50	-0.65145	1.18522	-1.31027	0.197148	0.745428
Atp2b1;S17	G5E829;S17	0.432796	1.84471	1.30874	0.197661	0.74623
Fam171a2;T787	A2A699;T787	-0.570076	0.0963632	-1.30809	0.197879	0.746292
Ncam1;S1005	P13595;S1005	0.78417	1.40869	1.3079	0.197941	0.746292
Sgip1;T263	Q8VD37;T263	0.701823	2.05766	1.30775	0.197991	0.746292
Mff;T89	Q6PCP5;T89	0.468551	4.52539	1.30714	0.1982	0.746682
Pde7b;S45	Q9QXQ1;S45	-0.507417	-2.95185	-1.30657	0.198389	0.747
Srrm2;S1810	Q8BTI8;S1810	-0.49051	-0.264292	-1.30592	0.198609	0.747432
Camsap1;S560	A2AHC3;S560	0.43883	0.0966719	1.29949	0.200785	0.750073
Camsap1;T559	A2AHC3;T559	0.43883	0.0966719	1.29949	0.200785	0.750073
Cnksr2;S756	Q80YA9;S756	0.29811	2.77381	1.3007	0.200373	0.750073
Crmp1;S521	P97427;S521	0.55276	4.37474	1.30123	0.200195	0.750073
Ctnna2;S640	Q61301;S640	-0.522382	1.02196	-1.30122	0.200198	0.750073
Daam2;S704	Q80U19;S704	0.442705	0.25813	1.3013	0.20017	0.750073
Kcnh1;T897	Q60603;T897	0.346708	0.227799	1.30215	0.199882	0.750073
Kif21a;S1660	Q9QXL2;S1660	-0.416499	-0.537936	-1.30173	0.200026	0.750073
Sik3;S610	Q6P4S6;S610	0.329422	-1.58569	1.30124	0.200192	0.750073
Slc12a5;S1047	Q91V14;S1047	-0.608147	0.871717	-1.30219	0.199868	0.750073
Sptbn1;S2318	Q62261;S2318	-0.68278	1.64633	-1.29951	0.200778	0.750073
Srsf1;S199	Q6PDM2;S199	0.369419	3.69671	1.30097	0.200284	0.750073
Tnfaip3;S550	Q60769;S550	0.368862	-2.34994	1.2997	0.200714	0.750073
Wdr20;S432	Q9D5R2;S432	0.521608	2.9854	1.30126	0.200184	0.750073
Map2;S1743	P20357;S1743	-0.531577	1.55812	-1.29859	0.201091	0.750325
Myo18a;T978	Q9JMH9;T978	0.419211	-2.98456	1.2982	0.201225	0.750325
Rap1gap;T522	A2ALS5;T522	-0.967887	-0.059887	-1.29775	0.201379	0.750325
Sfr1;S71	Q8BP27;S71	-0.377418	2.33632	-1.29779	0.201365	0.750325
Shank2;S43	Q80Z38;S43	0.851706	-1.37896	1.29795	0.201309	0.750325
Add3;T722	Q9QYC0;T722	0.39356	-1.31654	1.2967	0.201737	0.750752
Akt1s1;S213	Q9D1F4;S213	0.289769	-0.304587	1.29617	0.201915	0.750752
Arfgef3;S1646	Q3UGY8;S1646	0.718965	1.4869	1.29637	0.201847	0.750752
Shank2;S1005	Q80Z38;S1005	0.357336	-1.8325	1.29668	0.201742	0.750752
Macf1;S5988	Q9QXZ0;S5988	-0.48663	-0.215775	-1.29564	0.202097	0.751036
Eif4b;S409	Q8BGD9;S409	0.524682	2.32052	1.2951	0.20228	0.751178
Iscu;S21	Q9D7P6;S21	-0.237229	-0.644893	-1.29461	0.202451	0.751178
Rims1;S241	Q99NE5;S241	0.87442	3.3555	1.29476	0.202399	0.751178
Map2;S764	P20357;S764	-0.410459	0.326401	-1.29409	0.202627	0.751441
Syn2;S420	Q64332;S420	0.974866	5.80332	1.29305	0.202984	0.752134
Usp24;S1138	B1AY13;S1138	0.354446	0.351988	1.29293	0.203026	0.752134
Asap2;S704	Q7SIG6;S704	-0.31966	1.58738	-1.292	0.203345	0.752608
Basp1;T132	Q91XV3;T132	-0.499569	0.102858	-1.29102	0.203682	0.752608
Mark1;S382	Q8VHJ5;S382	0.38604	-0.752725	1.29117	0.203627	0.752608
Matr3;S604	Q8K310;S604	-1.35648	-0.905362	-1.2914	0.203549	0.752608
Slc38a3;S53	Q9DCP2;S53	0.397993	0.470307	1.29165	0.203463	0.752608
Acin1;S491	Q9JIX8;S491	-0.492322	-0.367289	-1.28707	0.205041	0.752849
Anks1b;S964	Q8BIZ1;S964	0.644027	0.222009	1.28046	0.207331	0.752849
Arhgap23;S372	Q69ZH9;S372	0.601072	0.196529	1.28114	0.207097	0.752849
Atp1a3;S643	Q6PIC6;S643	1.3258	-1.12107	1.28294	0.20647	0.752849
Begain;S483	Q68EF6;S483	0.711251	1.97998	1.28197	0.206806	0.752849
Capn5;T44	O08688;T44	0.520628	1.14278	1.28137	0.207017	0.752849
Cdk16;S119	Q04735;S119	0.394489	1.69799	1.28064	0.207269	0.752849
Cdk17;S146	Q8K0D0;S146	0.394489	1.69799	1.28064	0.207269	0.752849
Ckap2l;T274	Q7TS74;T274	-0.510804	-1.01721	-1.28355	0.206257	0.752849
Dact3;S217	Q0PHV7;S217	0.574858	-0.755057	1.28266	0.206566	0.752849
Dmtn;S22	Q9WV69;S22	0.410571	-1.40101	1.28442	0.205958	0.752849
Dnajb7;S281	Q9QYI8;S281	0.547775	2.06356	1.28746	0.204905	0.752849
Dpysl3;T519	Q62188;T519	1.14545	0.556429	1.2799	0.207529	0.752849
Eno1;T272	P17182;T272	-0.729334	-4.12267	-1.27989	0.207531	0.752849
Fgd1;S116	P52734;S116	0.723605	-0.162599	1.28101	0.20714	0.752849
Gja1;S325	P23242;S325	0.850545	3.04224	1.2798	0.207561	0.752849
Hist1h1b;S18	P43276;S18	0.333938	2.42343	1.28224	0.206714	0.752849
Kcnc2;S509	Q14B80;S509	0.434632	-2.18225	1.28266	0.206567	0.752849
Kiaa1671;S262	Q8BRV5;S262	0.484718	-2.06468	1.28272	0.206548	0.752849
Lppr4;S549	Q7TME0;S549	-0.831926	2.70669	-1.28499	0.205758	0.752849
Lrrc7;S1118	Q80TE7;S1118	-0.637318	0.840572	-1.28695	0.205082	0.752849
Map2;S1140	P20357;S1140	-0.884133	2.11527	-1.28841	0.204578	0.752849
Map2;S1787	P20357;S1787	-0.739161	0.999507	-1.28762	0.204851	0.752849
Mast3;S1229	Q3U214;S1229	0.451429	-1.73351	1.28545	0.205602	0.752849
Mkl1;T488	Q8K4J6;T488	-0.477739	-0.320083	-1.28533	0.205641	0.752849
Nefh;S834	P19246;S834	0.311154	4.82058	1.27988	0.207533	0.752849
Peak1;S877	Q69Z38;S877	0.525169	-1.1634	1.28104	0.207129	0.752849
Phactr1;S467	Q2M3X8;S467	0.542293	0.0780881	1.28674	0.205155	0.752849
Pip5k1a;S443	P70182;S443	-0.477136	-0.739802	-1.28804	0.204706	0.752849
Prrt3;S833	Q6PE13;S833	0.298456	5.31926	1.28135	0.207023	0.752849
Rbsn;S218	Q80Y56;S218	0.603498	0.692255	1.27981	0.20756	0.752849
Srrm2;S1269	Q8BTI8;S1269	-0.370307	1.42041	-1.28646	0.205253	0.752849
Stim2;S609	P83093;S609	0.536135	-1.30099	1.28839	0.204585	0.752849
Syt2;T128	P46097;T128	-0.344494	4.30474	-1.28081	0.207209	0.752849
Tbc1d10b;S22	Q8BHL3;S22	0.385948	-0.671857	1.28798	0.204725	0.752849
Thrap3;S695	Q569Z6;S695	0.403727	0.706218	1.28714	0.205017	0.752849
Tmcc2;S137	Q80W04;S137	0.475287	-1.24545	1.27953	0.207657	0.752849
Epb41l3;T518	Q9WV92;T518	0.319823	-0.793028	1.27815	0.208138	0.753061
Frmd4a;S712	Q8BIE6;S712	0.341835	-0.169694	1.27823	0.208111	0.753061
Rtn4;S165	Q99P72;S165	0.535581	3.53703	1.2786	0.207981	0.753061
Syn1;S427	O88935;S427	0.459011	7.09303	1.27852	0.208007	0.753061
Cpeb2;S24	Q812E0;S24	-0.484544	-0.85499	-1.27746	0.208378	0.753367
Ncor2;S863	Q9WU42;S863	0.468752	-0.443923	1.2773	0.208434	0.753367
C2cd2l;S662	Q80X80;S662	-0.4223	0.254991	-1.27512	0.209197	0.753385
Gas7;S108	Q60780;S108	-1.08361	-1.32754	-1.27689	0.208578	0.753385
Map2;S737	P20357;S737	-0.728647	2.48525	-1.27572	0.208987	0.753385
Ndrg1;S2	Q62433;S2	0.343435	1.75421	1.27632	0.208776	0.753385
Srrm2;T1974	Q8BTI8;T1974	-0.785425	0.617282	-1.27493	0.209266	0.753385
Tecpr1;S485	Q80VP0;S485	0.385941	-2.46742	1.27647	0.208724	0.753385
Tomm70a;S105	Q9CZW5;S105	-0.514557	-0.878386	-1.27487	0.209285	0.753385
Wfs1;T5	P56695;T5	0.737782	1.08004	1.2757	0.208995	0.753385
Arfgap3;S241	Q9D8S3;S241	0.698066	0.0669854	1.2742	0.209522	0.753795
Hspa12b;S46	Q9CZJ2;S46	0.509635	1.02526	1.27277	0.210023	0.753795
Lrfn1;T727	Q2WF71;T727	-0.279411	-0.023315	-1.27374	0.209681	0.753795
Myo18a;S2037	Q9JMH9;S2037	-0.489647	-0.654715	-1.27214	0.210246	0.753795
Osbpl11;S15	Q8CI95;S15	0.638053	-2.46593	1.27237	0.210163	0.753795
Prkcg;T655	P63318;T655	0.293498	6.93404	1.27248	0.210124	0.753795
Rps6ka1;S352	P18653;S352	0.378254	-1.38724	1.27313	0.209895	0.753795
Stxbp5l;S1120	Q5DQR4;S1120	0.68791	-2.01718	1.27291	0.209973	0.753795
Pfkfb2;S496	P70265;S496	0.649549	-1.98161	1.27179	0.210368	0.753854
Eef1g;S33	Q9D8N0;S33	0.594497	-0.936129	1.27094	0.210667	0.754547
Syn1;S502	O88935;S502	0.619378	0.0300338	1.27053	0.210811	0.754683
Add1;T614	Q9QYC0;T614	0.377282	5.10729	1.26978	0.211078	0.755258
Rasgrf2;S745	P70392;S745	0.257065	2.22643	1.26884	0.211407	0.756055
Macf1;S1367	Q9QXZ0;S1367	-0.623735	-2.95425	-1.26738	0.211923	0.757522
Aak1;T651	Q3UHJ0;T651	0.359712	1.89529	1.25916	0.21485	0.75869
Adcyap1r1;S462	P70205;S462	0.280042	3.43778	1.25454	0.216506	0.75869
Ahctf1;T1224	Q8CJF7;T1224	0.298785	-2.92444	1.25412	0.216658	0.75869
Als2;S486	Q920R0;S486	0.664948	0.311295	1.26461	0.212908	0.75869
Amer2;S589	Q8CCJ4;S589	0.799167	-1.65071	1.26347	0.213313	0.75869
[truncated: 5,126 more rows]

## Sheet: Supplementary DataS3B_female
Supplementary DataS3B Analysis of differentially expressed PTM (DEPTM) in 5xFADvsWT in female mouse
siteIDs	uniprotIDs	logFC	AveExpr	t	P.Value	adj.P.Val
Itm2c;T39	Q91VK4;T39	2.50391	-0.179226	6.29115	1.44785e-07	0.00103145
Rab7a;S72	P51150;S72	1.93414	-2.16619	5.6602	1.1819e-06	0.00420991
Map1a;S1316	Q9QYR6;S1316	-3.02353	-0.0562873	-5.31422	3.71064e-06	0.00881153
App;S441	P12023;S441	2.25898	-0.0236186	5.07523	8.13041e-06	0.0115842
Pclo;S3514	Q9QYX7;S3514	-2.58345	0.857227	-5.09597	7.5971e-06	0.0115842
Gfap;S12	P03995;S12	2.26689	1.46513	4.97584	1.12454e-05	0.013352
Gfap;T107	P03995;T107	1.29747	-2.10225	4.8389	1.75441e-05	0.0178548
Nefm;S605	P08553;S605	2.00237	6.33334	4.62913	3.44848e-05	0.0261077
Syt11;S133	Q9R0N3;S133	1.5608	-1.46234	4.62374	3.50857e-05	0.0261077
Tmem55a;T22	Q9CZX7;T22	1.99753	1.15741	4.61014	3.66475e-05	0.0261077
Map4;S517	P27546;S517	1.44017	0.0696694	4.54711	4.48235e-05	0.0290294
Nefm;S610	P08553;S610	1.8609	6.83446	4.51759	4.92446e-05	0.0292349
Camsap1;S550	A2AHC3;S550	-1.7109	-2.17361	-4.4103	6.92153e-05	0.0352207
Prrt3;S903	Q6PE13;S903	-1.95448	0.451753	-4.42968	6.50997e-05	0.0352207
App;T743	P12023;T743	3.34175	-0.512506	4.37661	7.69865e-05	0.0365635
Mlf2;S151	Q99KX1;S151	-1.31497	-2.34273	-4.34331	8.55067e-05	0.0380719
Akap13;S1892	E9Q394;S1892	1.2285	-0.752651	4.21867	0.000126366	0.0421909
Ccdc6;S316	D3YZP9;S316	-1.63195	0.0300308	-4.13527	0.000163775	0.0421909
Gfap;T147	P03995;T147	1.20649	-2.41505	4.22761	0.00012289	0.0421909
Kcnma1;S923	Q08460;S923	-1.34074	-1.30355	-4.23018	0.000121907	0.0421909
Kpna6;S6	O35345;S6	-1.66026	-1.77547	-4.14649	0.000158174	0.0421909
Lyst;S3251	P97412;S3251	-0.951074	-2.56525	-4.13125	0.000165826	0.0421909
Prrt3;S865	Q6PE13;S865	-2.32724	0.275801	-4.20469	0.000131996	0.0421909
Ptprc;S964	P06800;S964	1.57365	-0.208842	4.27145	0.000107149	0.0421909
Ptprz1;S1457	B9EKR1;S1457	-2.15481	-0.586426	-4.13729	0.000162753	0.0421909
Smarcc2;S347	Q6PDG5;S347	1.52329	0.87375	4.16665	0.000148579	0.0421909
Supt6h;S125	Q62383;S125	1.41616	-0.776329	4.1386	0.000162092	0.0421909
Tubb2a;T166	Q7TMM9;T166	-1.74986	-1.34966	-4.22368	0.000124408	0.0421909
Efnb2;T277	P52800;T277	-1.25837	-1.47736	-4.1018	0.000181647	0.0440178
Nsmf;S58	Q99NF2;S58	-1.70722	-0.131833	-4.08802	0.000189547	0.0440178
Pak1;S144	O88643;S144	-1.12128	-1.10941	-4.08462	0.000191543	0.0440178
S1pr1;S351	O08530;S351	1.57502	0.167164	4.05015	0.000213011	0.0474216
Cacnb1;S26	Q8R3Z5;S26	-1.11675	-1.63642	-4.02877	0.000227481	0.0482688
Lrrc7;S933	Q80TE7;S933	-1.469	0.366181	-4.01521	0.000237143	0.0482688
Ndrg1;S330	Q62433;S330	2.34128	1.09753	4.02139	0.000232694	0.0482688
Dagla;S733	Q6WQJ1;S733	1.21023	-0.783019	3.99189	0.000254712	0.0504046
Usp7;S19	Q6A4J8;S19	1.5778	0.806573	3.9746	0.000268545	0.0517058
Dip2b;S99	Q3UH60;S99	1.48412	0.178189	3.95161	0.000288073	0.052649
Rin1;S590	Q921Q7;S590	1.31005	0.00670672	3.95144	0.000288225	0.052649
Sh3pxd2a;S1047	O89032;S1047	1.15447	-1.23038	3.92196	0.000315293	0.0561536
Ywhab;T2	Q9CQV8;T2	-1.44212	-0.139656	-3.89722	0.000339902	0.05906
Palm;S157	Q9Z0P4;S157	-2.07383	2.94206	-3.87545	0.000363087	0.0601542
Slc38a7;S28	Q8BWH0;S28	1.3002	-1.36663	3.88128	0.000356732	0.0601542
Bcan;T544	Q61361;T544	1.34049	0.010276	3.80809	0.000444936	0.063082
Brsk1;S399	Q5RJI5;S399	1.5948	0.114854	3.8452	0.000397868	0.063082
Caskin1;S1083	Q6P9K8;S1083	1.48108	1.93677	3.80315	0.000451598	0.063082
Cdh10;S784	P70408;S784	-1.49231	-0.0244266	-3.8273	0.000419934	0.063082
Cltc;T105	Q68FD5;T105	-1.17269	-2.17171	-3.82132	0.000427576	0.063082
Hnrnpk;S284	P61979;S284	-2.0463	0.543974	-3.81248	0.000439095	0.063082
Pebp1;T42	P70296;T42	1.77382	-0.278889	3.82068	0.000428394	0.063082
Reep2;S152	Q8VCD6;S152	1.97064	0.677186	3.83793	0.000406693	0.063082
Chmp6;S119	P0C0A3;S119	1.47905	0.918663	3.77569	0.000490393	0.0646955
Map2;S28	P20357;S28	-1.09647	5.81301	-3.78196	0.000481273	0.0646955
Pip5k1c;S645	O70161;S645	-2.29194	0.684977	-3.77821	0.000486706	0.0646955
Map1b;S2410	P14873;S2410	-1.45889	-1.33912	-3.75968	0.000514495	0.0658629
Syn3;S9	Q8JZP2;S9	-2.08082	0.0424142	-3.75758	0.000517732	0.0658629
Srcin1;S46	Q9QWI6;S46	-1.8698	1.72558	-3.74825	0.000532373	0.0665372
Syt6;T137	Q9R0N8;T137	-1.26708	-2.58919	-3.7422	0.000542088	0.0665833
Pde1b;S7	Q01065;S7	-1.04598	-0.916919	-3.71444	0.000588879	0.0711046
Lphn3;S1485	Q80TS3;S1485	-1.19761	-1.76157	-3.69315	0.00062739	0.0720891
Prkcg;T689	P63318;T689	-2.82941	0.384738	-3.69462	0.000624655	0.0720891
Slco2b1;S21	Q8BXB6;S21	1.42159	0.14202	3.69864	0.000617239	0.0720891
Prkar2b;S85	P31324;S85	-1.73266	1.31072	-3.6743	0.000663491	0.0729021
Rabep1;T480	O35551;T480	1.38027	-0.433607	3.67976	0.000652823	0.0729021
Syngap1;S766	F6SEU4;S766	2.09323	1.03338	3.67345	0.000665165	0.0729021
Mbp;T167	P04370;T167	0.80416	1.48245	3.65511	0.000702292	0.0758049
Mllt4;S216	Q9QZQ1;S216	1.26848	0.913449	3.64778	0.000717673	0.076309
Arhgap32;S952	Q811P8;S952	3.20046	1.17981	3.64167	0.000730752	0.076557
Syt11;S113	Q9R0N3;S113	1.5067	-0.979344	3.63007	0.000756225	0.0780775
Plcl2;T585	Q8K394;T585	-1.10599	1.74161	-3.62122	0.000776213	0.0789963
Slc15a2;S9	Q9ES07;S9	1.66795	0.236535	3.61568	0.000788978	0.0791645
Camkk2;S99	Q8C078;S99	1.43262	0.446241	3.60973	0.000802929	0.0794453
C2cd2l;S674	Q80X80;S674	1.71448	-1.53727	3.57018	0.000901803	0.0801103
Clcn6;S774	O35454;S774	1.12368	-2.26741	3.55889	0.000932103	0.0801103
Cntnap2;S1307	Q9CPW0;S1307	-1.28984	-0.123793	-3.57945	0.000877639	0.0801103
Dst;S5407	Q91ZU6;S5407	-0.878049	-2.57626	-3.53984	0.000985493	0.0801103
Fam169a;S512	Q5XG69;S512	-1.34092	0.395538	-3.53842	0.000989572	0.0801103
Gpr158;S946	Q8C419;S946	-1.06783	-1.23819	-3.54284	0.000976883	0.0801103
Gtpbp1;S580	O08582;S580	-1.10479	1.03529	-3.53973	0.000985811	0.0801103
Lmtk3;S962	Q5XJV6;S962	1.31883	0.393644	3.56902	0.000904874	0.0801103
Macf1;S4611	Q9QXZ0;S4611	-1.09525	0.0941338	-3.54114	0.000981737	0.0801103
Ndrg1;S2	Q62433;S2	0.976455	1.75421	3.57809	0.000881139	0.0801103
Pum1;S124	Q80U78;S124	1.18094	-0.620857	3.55317	0.000947848	0.0801103
Slc1a3;S512	P56564;S512	1.96319	3.67181	3.58566	0.000861779	0.0801103
Stim2;S28	P83093;S28	1.26885	1.11712	3.60155	0.00082248	0.0801103
Tmcc2;S137	Q80W04;S137	1.33767	-1.24545	3.5508	0.000954424	0.0801103
Tmem9b;S143	Q9JJR8;S143	1.17761	-0.278405	3.57394	0.00089193	0.0801103
Ttbk1;S484	Q6PCN3;S484	-1.13973	-1.51967	-3.57118	0.000899163	0.0801103
Kcnma1;S924	Q08460;S924	-1.09672	-1.41104	-3.53331	0.00100445	0.0804007
Trim32;S330	Q8CH72;S330	1.13511	1.71625	3.52806	0.00101994	0.0807338
Adam22;S832	Q9R1V6;S832	-1.31709	1.52949	-3.50382	0.00109447	0.0856817
Arfgef3;S2074	Q3UGY8;S2074	1.70136	0.199212	3.49538	0.00112166	0.0859219
Nmt1;S31	O70310;S31	1.38757	1.5697	3.49676	0.00111716	0.0859219
Cetn2;S20	Q9R1K9;S20	1.461	2.15978	3.47591	0.00118678	0.0894374
Ube2o;S833	Q6ZPJ3;S833	1.61853	1.29072	3.47421	0.00119267	0.0894374
Asap1;S732	Q9QWY8;S732	-1.69331	1.54621	-3.46226	0.00123459	0.0912535
Larp1;T626	Q6ZQ58;T626	-0.944704	-2.47143	-3.46005	0.0012425	0.0912535
Cacna1a;T1935	P97445;T1935	-1.03971	0.711085	-3.42863	0.00136039	0.0960057
Dlg2;S530	Q91XM9;S530	-1.64473	-0.977899	-3.42844	0.00136111	0.0960057
Grin2b;S917	Q01097;S917	2.04202	-1.01339	3.43421	0.00133871	0.0960057
Lifr;S922	P42703;S922	0.838747	-1.05921	3.43812	0.00132371	0.0960057
Ube2o;S1196	Q6ZPJ3;S1196	1.68735	0.978947	3.4247	0.00137585	0.0960939
Unc79;S1761	Q0KK59;S1761	1.45871	-0.1152	3.41978	0.00139547	0.0965175
Pgm3;S64	Q9CYR6;S64	1.2879	-0.158693	3.41305	0.00142272	0.0974563
Ttyh3;S496	Q6P5F7;S496	-1.5385	1.21616	-3.39696	0.00148997	0.100137
Vcpip1;S1196	Q8CDG3;S1196	1.47201	0.395602	3.39941	0.00147952	0.100137
Gnao1;S207	P18872;S207	-0.843181	-1.24416	-3.39125	0.00151453	0.100165
Plcl1;S96	Q3USB7;S96	1.33062	0.109428	3.38707	0.00153277	0.100165
Scg3;S365	P47867;S365	0.934841	1.90458	3.38392	0.00154663	0.100165
Snph;S20	Q80U23;S20	-2.51609	1.61701	-3.38968	0.00152135	0.100165
Clmp;T316	Q8R373;T316	-1.14836	-2.76549	-3.37701	0.00157752	0.101246
Arpp19;S67	P60840;S67	1.58713	0.422959	3.36403	0.00163709	0.102304
Cap1;S34	P40124;S34	1.06788	2.69221	3.36929	0.00161273	0.102304
Stk3;S316	Q9JI10;S316	1.09299	-0.745364	3.36605	0.00162771	0.102304
Kcnj6;S25	P48542;S25	1.40207	0.649904	3.35704	0.00167007	0.103457
Atp1a2;S464	Q6PIE5;S464	-0.972307	-1.44812	-3.32302	0.00183979	0.106303
Cntn1;T584	P12960;T584	-1.06457	-0.00583586	-3.31928	0.0018594	0.106303
Dnm1l;S622	Q8K1M6;S622	-0.758727	1.61088	-3.33184	0.00179427	0.106303
Flnc;S2234	Q8VHX6;S2234	2.82537	-1.84957	3.32584	0.00182511	0.106303
Gab1;S552	Q9QYY0;S552	0.906625	-0.396347	3.31537	0.00188014	0.106303
Hdac4;S629	Q6NZM9;S629	-1.10516	0.455822	-3.33704	0.00176796	0.106303
Hmbox1;S148	Q8BJA3;S148	-1.25043	-2.56581	-3.31549	0.00187948	0.106303
Itsn2;S110	Q9Z0R6;S110	-1.30671	-1.80945	-3.3221	0.00184459	0.106303
Jph3;S457	Q9ET77;S457	-1.53616	-1.74505	-3.31569	0.00187844	0.106303
Map1b;S1321	P14873;S1321	-1.81353	0.299861	-3.3265	0.00182169	0.106303
Slc6a7;S600	Q6PGE7;S600	-1.56246	2.02086	-3.33469	0.00177981	0.106303
Tcf4;S514	Q60722;S514	1.28091	0.416113	3.30851	0.00191706	0.107537
Cacna1e;S793	Q61290;S793	-1.29072	0.310659	-3.29242	0.00200633	0.110799
Ddi2;S121	A2ADY9;S121	-1.54638	-0.728687	-3.29326	0.00200158	0.110799
Agfg1;T177	Q8K2K6;T177	1.98686	-0.590557	3.25777	0.00221219	0.111063
Bcl11a;S86	Q9QYE3;S86	1.3223	1.322	3.18455	0.00271498	0.111063
Cacna1a;S2273	P97445;S2273	1.1892	0.850607	3.1835	0.0027229	0.111063
Cacna1a;S752	P97445;S752	-1.26159	-1.10984	-3.2556	0.00222572	0.111063
Cdk18;S66	Q04899;S66	-1.05519	0.577016	-3.24519	0.00229177	0.111063
Cdkl5;S377	Q3UTQ8;S377	1.63242	-0.528601	3.2668	0.00215671	0.111063
Chrm1;S321	P12657;S321	-1.00523	1.66915	-3.27522	0.00210615	0.111063
Cntnap2;S1304	Q9CPW0;S1304	-1.31184	0.0719644	-3.25706	0.00221662	0.111063
Ctnnb1;S552	Q02248;S552	1.24627	3.98608	3.18572	0.00270617	0.111063
Dclk2;S374	Q6PGN3;S374	-1.02298	0.580044	-3.20132	0.00259109	0.111063
Dlgap1;S389	Q9D415;S389	1.13346	1.46679	3.22832	0.00240278	0.111063
Elfn2;S472	Q68FM6;S472	1.40655	0.768463	3.19275	0.00265366	0.111063
Enah;T734	Q03173;T734	-1.24382	-0.162648	-3.21128	0.00252004	0.111063
Htatsf1;S388	Q8BGC0;S388	1.53606	-0.457295	3.1888	0.00268307	0.111063
Inpp5f;S714	Q8CDA1;S714	-1.30136	-0.533814	-3.21128	0.00252003	0.111063
Iqsec2;S402	Q5DU25;S402	1.30781	3.4942	3.28285	0.00206128	0.111063
Jph4;S222	Q80WT0;S222	0.925054	-2.86515	3.2008	0.00259479	0.111063
Kiaa0513;S275	Q8R0A7;S275	-0.901006	4.14349	-3.19624	0.00262798	0.111063
Lima1;S225	Q9ERG0;S225	1.20265	-0.0305717	3.27258	0.00212188	0.111063
Limch1;S231	Q3UH68;S231	1.02659	1.36203	3.21118	0.00252073	0.111063
Lppr4;S474	Q7TME0;S474	1.37946	1.73415	3.17871	0.00275943	0.111063
Lrrc7;S999	Q80TE7;S999	1.81736	-1.71768	3.2376	0.00234108	0.111063
Map1b;S343	P14873;S343	-1.59099	-0.763052	-3.18373	0.00272112	0.111063
Map2;T288	P20357;T288	1.86817	-1.01617	3.17901	0.00275707	0.111063
Map7d1;T49	A2AJI0;T49	-1.80242	-0.00155965	-3.2782	0.00208851	0.111063
Mast4;S1368	Q811L6;S1368	0.938146	-1.91141	3.19252	0.00265541	0.111063
Necap2;T180	Q9D1J1;T180	1.07819	-1.47274	3.24107	0.00231841	0.111063
Nono;T452	Q99K48;T452	1.62996	0.0323474	3.25322	0.00224069	0.111063
Nt5c;T102	Q9JM14;T102	-2.21212	-1.96236	-3.22312	0.00243798	0.111063
Panx2;S514	Q6IMP4;S514	0.890937	-2.97129	3.21855	0.00246936	0.111063
Pcbp2;S268	Q61990;S268	1.71841	1.88319	3.22133	0.00245026	0.111063
Pclo;S1829	Q9QYX7;S1829	-0.553122	2.69432	-3.18008	0.00274892	0.111063
Plekhf2;S16	Q91WB4;S16	0.966387	-0.316139	3.23105	0.00238449	0.111063
Ppp3ca;S498	P63328;S498	1.24692	-1.30646	3.19734	0.00261997	0.111063
Rgs14;S143	P97492;S143	-1.40957	-1.39602	-3.23183	0.00237923	0.111063
Sgsm1;S229	Q8BPQ7;S229	-1.71652	0.321841	-3.22962	0.00239404	0.111063
Sirt2;S372	Q8VDQ8;S372	1.09303	1.9997	3.2134	0.00250515	0.111063
Slc4a4;S245	O88343;S245	-1.28214	2.35648	-3.20427	0.00256985	0.111063
Slc7a14;S488	Q8BXR1;S488	-1.98983	-2.3696	-3.21155	0.00251813	0.111063
Snx19;S379	Q6P4T1;S379	0.957927	-1.69761	3.20543	0.00256153	0.111063
Sorbs1;S576	Q62417;S576	1.1106	-0.681176	3.21097	0.00252222	0.111063
Syn1;S699	O88935;S699	1.06023	-3.5205	3.18958	0.00267718	0.111063
Tanc2;S1549	A2A690;S1549	-1.0018	-0.522119	-3.2558	0.00222446	0.111063
Tanc2;S5	A2A690;S5	1.03323	-0.947221	3.17946	0.00275365	0.111063
Tanc2;T434	A2A690;T434	-1.85298	1.0115	-3.19894	0.00260833	0.111063
Tmem55a;S47	Q9CZX7;S47	1.25634	-0.544917	3.23224	0.00237654	0.111063
Ttc3;S1009	O88196;S1009	-1.1684	-1.26971	-3.2415	0.0023156	0.111063
Tubb2a;S168	Q7TMM9;S168	1.19875	-0.14704	3.23492	0.00235877	0.111063
Ablim1;S789	Q8K4G5;S789	-1.32941	-1.15369	-3.15667	0.00293339	0.111189
Abr;S57	Q5SSL4;S57	-1.30038	-2.69959	-3.15143	0.00297627	0.111189
Cntn1;Y583	P12960;Y583	-1.0693	-0.0380811	-3.15829	0.00292031	0.111189
Dock3;S1655	Q8CIQ7;S1655	-1.09375	-1.44646	-3.17114	0.00281801	0.111189
Git1;S419	Q68FF6;S419	-1.33101	0.700314	-3.16759	0.00284594	0.111189
Irf2bpl;S195	Q8K3X4;S195	1.46518	0.44074	3.17376	0.00279758	0.111189
Kndc1;S267	Q0KK55;S267	0.796312	-2.88464	3.15374	0.00295735	0.111189
Pdlim4;S119	P70271;S119	1.33527	1.563	3.16473	0.00286864	0.111189
Sik3;S856	Q6P4S6;S856	-1.18621	-0.999226	-3.1509	0.00298063	0.111189
Slc1a2;S21	P43006;S21	-1.78625	-2.80264	-3.15366	0.00295796	0.111189
Slc20a1;S273	Q61609;S273	-1.17741	-0.480487	-3.16488	0.00286738	0.111189
Tuba1b;T223	P05213;T223	-1.01434	-0.859439	-3.1579	0.00292345	0.111189
Uhrf1bp1l;S934	A2RSJ4;S934	1.38423	0.901446	3.15184	0.00297294	0.111189
Vti1b;S138	O88384;S138	0.861824	-0.573	3.15085	0.00298107	0.111189
Arfgef3;S471	Q3UGY8;S471	1.44913	1.08946	3.14347	0.00304256	0.112251
Dlgap1;S605	Q9D415;S605	1.28579	-0.173118	3.14045	0.00306807	0.112251
Pitpnm1;S593	O35954;S593	1.26154	0.966894	3.14456	0.0030334	0.112251
Thrap3;S572	Q569Z6;S572	1.32958	1.78379	3.13992	0.00307257	0.112251
Epb41l1;S407	Q9Z2H5;S407	-0.850429	-2.11501	-3.1353	0.00311202	0.113113
Hdac1;S393	O09106;S393	1.40171	1.95497	3.11875	0.00325733	0.117793
Srcin1;S399	Q9QWI6;S399	1.46403	1.41623	3.11631	0.00327924	0.117986
Caskin1;S708	Q6P9K8;S708	1.12673	-1.81926	3.11082	0.00332916	0.118683
Rbm43;S137	Q99J64;S137	1.13815	-1.13589	3.11052	0.00333193	0.118683
Taldo1;S237	Q93092;S237	1.14015	-0.131324	3.10614	0.00337233	0.119525
Map1b;S2030	P14873;S2030	-1.03549	1.71346	-3.09881	0.00344085	0.120384
Pdha1;S300	P35486;S300	1.39106	4.38406	3.10156	0.00341499	0.120384
Zfhx3;T671	Q61329;T671	1.11086	-0.221629	3.09813	0.00344727	0.120384
Tubb2a;T312	Q7TMM9;T312	-1.3781	-3.01277	-3.09328	0.00349349	0.121403
Epb41l1;S60	Q9Z2H5;S60	1.90751	2.17563	3.0905	0.0035202	0.121738
Cntf;S7	P51642;S7	1.0334	-2.25366	3.08307	0.00359267	0.12347
Slc20a1;S268	Q61609;S268	-1.15066	-0.499285	-3.08182	0.00360497	0.12347
Scrib;S1361	Q80U72;S1361	0.970896	-2.02661	3.07413	0.00368164	0.125493
Ank3;S1863	G5E8K5;S1863	0.911666	0.53898	3.06654	0.00375875	0.125539
Atp1a1;S47	Q8VDN2;S47	-0.821185	0.58353	-3.06979	0.00372553	0.125539
Cdk17;S165	Q8K0D0;S165	1.01477	-0.179498	3.06534	0.00377109	0.125539
Enah;S738	Q03173;S738	-1.18454	-0.212366	-3.07087	0.00371452	0.125539
Slc17a7;S522	Q3TXX4;S522	-1.22867	4.12085	-3.06762	0.00374769	0.125539
Cnksr2;T339	Q80YA9;T339	1.22202	2.69322	3.06073	0.00381883	0.126536
Sgsm1;S232	Q8BPQ7;S232	1.28928	1.31289	3.05514	0.00387755	0.127713
Slc17a7;S519	Q3TXX4;S519	-1.24032	4.25117	-3.05394	0.0038902	0.127713
Nedd4;T287	P46935;T287	0.921267	0.191067	3.05089	0.0039227	0.128046
Serbp1;S329	Q9CY58;S329	1.17496	4.17799	3.04962	0.00393627	0.128046
Sorbs2;S315	Q3UTJ2;S315	1.08465	-0.381408	3.04113	0.00402824	0.130442
Arhgap39;S682	P59281;S682	1.0117	-0.432857	3.03745	0.00406874	0.130823
Prkg2;S431	Q61410;S431	-1.92178	-3.38184	-3.03673	0.00407675	0.130823
Apba1;S246	B2RUJ5;S246	-2.24928	0.942916	-3.01249	0.00435382	0.131479
Arfgef3;S2072	Q3UGY8;S2072	1.32242	-1.11722	3.00922	0.00439256	0.131479
Cacna1b;S745	O55017;S745	-0.944399	-2.24785	-3.01837	0.00428503	0.131479
Cacna1e;S1051	Q61290;S1051	1.06898	0.580438	3.01843	0.00428437	0.131479
Caskin1;S710	Q6P9K8;S710	1.56474	1.23692	3.01103	0.00437104	0.131479
Crmp1;S540	P97427;S540	3.05237	1.51628	3.02353	0.00422548	0.131479
Irs2;S590	P81122;S590	0.928223	-0.715727	3.00945	0.00438975	0.131479
Jph3;S440	Q9ET77;S440	-1.45795	-1.75391	-3.00916	0.00439321	0.131479
Npy;S82	P57774;S82	1.38141	0.193073	3.00767	0.00441095	0.131479
Ppip5k1;S982	A2ARP1;S982	-1.0671	-0.355378	-3.0217	0.00424658	0.131479
Rab11fip2;S229	G3XA57;S229	1.74857	0.720918	3.01335	0.00434372	0.131479
Rtn1;S487	Q8K0T0;S487	-1.27194	-0.557961	-3.01579	0.00431511	0.131479
Slc1a2;S520	P43006;S520	1.36515	0.568901	3.0171	0.00429984	0.131479
Slc8a1;S282	P70414;S282	1.49051	2.98087	3.02483	0.00421068	0.131479
Srgap3;S919	Q812A2;S919	1.29021	0.413942	3.02186	0.00424474	0.131479
Thy1;T74	P01831;T74	-0.851423	-1.96524	-3.03194	0.00413016	0.131479
Tmcc3;S216	Q8R310;S216	0.978925	-0.283006	3.01814	0.00428766	0.131479
Wipf2;S155	Q6PEV3;S155	-1.08954	0.351943	-3.00416	0.00445309	0.132183
Gmps;S332	Q3THK7;S332	-1.38463	0.610829	-2.99797	0.00452811	0.133852
Eif4g2;S394	Q62448;S394	-1.06633	-1.32218	-2.99298	0.00458959	0.135108
Apoe;S139	P08226;S139	1.38152	-0.271306	2.9772	0.00478895	0.135498
Bcas3;S869	Q8CCN5;S869	-1.07797	0.698888	-2.97754	0.00478455	0.135498
Cntn1;T586	P12960;T586	-1.00354	-0.0284752	-2.98409	0.00470082	0.135498
Map1a;S1762	Q9QYR6;S1762	-3.33739	1.115	-2.98302	0.0047144	0.135498
Map1a;S981	Q9QYR6;S981	-1.22212	4.03278	-2.98038	0.00474814	0.135498
Map4;S785	P27546;S785	1.02181	1.62624	2.9788	0.00476832	0.135498
Necap2;S181	Q9D1J1;S181	0.840924	-1.03058	2.97688	0.00479298	0.135498
Pak6;S602	Q8C015;S602	1.63275	-1.23732	2.98599	0.00467683	0.135498
Prox1;S79	P48437;S79	1.31853	-0.826706	2.97688	0.00479301	0.135498
Synpo;S740	Q8CC35;S740	-1.42447	-0.159652	-2.98948	0.00463308	0.135498
Itsn2;S843	Q9Z0R6;S843	1.02833	0.848078	2.97473	0.00482086	0.135746
Inpp5j;S310	P59644;S310	1.08496	-0.444904	2.97281	0.00484576	0.13591
Cacna1e;S737	Q61290;S737	1.31149	1.16257	2.96433	0.00495745	0.136059
Dclk1;S330	Q9JLM8;S330	0.989562	1.05246	2.9655	0.0049419	0.136059
Dennd5b;S833	A2RSQ0;S833	-0.929753	-2.41986	-2.96086	0.00500386	0.136059
Prkcb;T500	P68404;T500	-6.05296	2.56097	-2.97076	0.00487264	0.136059
Ralgapb;T379	Q8BQZ4;T379	-0.838031	0.0692415	-2.96541	0.00494306	0.136059
Sipa1l1;S1127	Q8C0T5;S1127	-0.932316	-3.2837	-2.96139	0.00499678	0.136059
Stk24;S4	Q99KH8;S4	1.35848	0.816835	2.96349	0.00496865	0.136059
Tubb4b;T274	P68372;T274	1.10717	-1.30066	2.96385	0.00496388	0.136059
Map1b;S2205	P14873;S2205	1.55528	-0.494676	2.95802	0.00504214	0.136579
Fez1;S316	Q8K0X8;S316	1.31619	-1.30035	2.95389	0.00509824	0.137575
Gnl1;S324	P36916;S324	1.1305	-0.372205	2.9496	0.00515725	0.138642
Aqp4;T289	P55088;T289	2.15368	0.34328	2.92887	0.00545118	0.1409
Arfgef3;S1881	Q3UGY8;S1881	1.14707	-1.71625	2.93805	0.0053191	0.1409
Caskin1;S650	Q6P9K8;S650	1.25404	2.05771	2.92834	0.00545879	0.1409
Map7d1;S34	A2AJI0;S34	-1.67381	-0.256497	-2.9311	0.00541876	0.1409
Otub1;S16	Q7TQI3;S16	-1.15487	-0.674649	-2.93064	0.00542546	0.1409
Pclo;S3506	Q9QYX7;S3506	-1.78167	-0.331151	-2.93176	0.00540917	0.1409
Prkar2b;S83	P31324;S83	-1.70607	1.13247	-2.93395	0.0053777	0.1409
Prkca;T497	P20444;T497	-5.98104	2.58216	-2.93639	0.00534267	0.1409
Prkcg;T514	P63318;T514	-5.99228	2.5645	-2.9327	0.00539573	0.1409
Rtn3;S270	Q9ES97;S270	1.0568	-0.720305	2.94196	0.00526379	0.1409
Tubb4b;S126	P68372;S126	-0.840271	-1.19976	-2.93988	0.00529313	0.1409
Lrp1b;S1992	Q9JI18;S1992	0.736736	1.45952	2.91861	0.00560226	0.143563
Lrp1b;Y1988	Q9JI18;Y1988	0.736736	1.45952	2.91861	0.00560226	0.143563
Epb41l3;T488	Q9WV92;T488	2.31465	-1.93538	2.91488	0.0056582	0.143961
Tubb4b;S168	P68372;S168	1.07964	0.0334836	2.91577	0.00564483	0.143961
Rb1cc1;S257	Q9ESK9;S257	0.798682	-1.41538	2.90566	0.00579865	0.147009
Stmn2;S62	P55821;S62	0.835101	2.14518	2.90327	0.00583558	0.147421
Arhgef7;S155	Q9ES28;S155	-0.970305	-1.35147	-2.89014	0.00604255	0.149365
Kif21a;S258	Q9QXL2;S258	1.34614	0.784544	2.8909	0.00603037	0.149365
Lrrc7;T1207	Q80TE7;T1207	1.77097	2.82381	2.88883	0.00606349	0.149365
Map2;S764	P20357;S764	-0.930762	0.326401	-2.89345	0.00598975	0.149365
Myl12b;T19	Q3THE2;T19	1.45885	-1.71673	2.88649	0.00610123	0.149365
Pclo;S4522	Q9QYX7;S4522	1.50092	-0.993788	2.89123	0.0060252	0.149365
Rab3c;S211	P62823;S211	-0.837647	1.18555	-2.88666	0.00609859	0.149365
Snx30;S40	Q8CE50;S40	-1.56482	-1.1035	-2.89174	0.0060169	0.149365
Stxbp5l;S819	Q5DQR4;S819	-1.27315	1.55932	-2.89683	0.00593628	0.149365
Arfgef3;S1646	Q3UGY8;S1646	1.61845	1.4869	2.87743	0.00624928	0.14984
Calml3;S82	P0DP28;S82	1.02718	-0.60838	2.87685	0.00625889	0.14984
Cdk12;S640	Q14AX6;S640	0.788973	-3.34371	2.87802	0.00623953	0.14984
Gtpbp1;S25	O08582;S25	-0.789842	1.92714	-2.87523	0.00628573	0.14984
Kcna1;S23	P16388;S23	-1.02099	0.0598631	-2.87719	0.00625324	0.14984
Srrm2;S1229	Q8BTI8;S1229	-1.28803	0.178234	-2.88077	0.00619435	0.14984
Stxbp5l;S822	Q5DQR4;S822	-1.27315	1.51224	-2.87504	0.00628892	0.14984
Synrg;S744	Q5SV85;S744	-1.10071	-0.594794	-2.88038	0.00620079	0.14984
Sdcbp;S6	O08992;S6	1.16432	-1.05991	2.87353	0.00631408	0.149938
Mpp2;S42	Q9WV34;S42	0.912918	1.31554	2.86773	0.00641153	0.151747
Asap1;S741	Q9QWY8;S741	-1.29505	-0.709156	-2.86491	0.00645944	0.152374
Bsn;S980	O88737;S980	-2.60442	0.958065	-2.86226	0.00650473	0.152747
Mkrn2;S139	Q9ERV1;S139	-0.936091	-0.432737	-2.86148	0.00651811	0.152747
Braf;S483	P28028;S483	-1.84729	2.40648	-2.85875	0.00656534	0.153349
Camk4;T196	P08414;T196	-1.06319	-0.713958	-2.85703	0.00659509	0.153541
Dync1li2;S411	Q6PDL0;S411	1.05235	0.0370755	2.85468	0.00663601	0.15399
Rap1gap2;S488	Q5SVL6;S488	-1.39777	-0.77401	-2.85344	0.00665768	0.153991
Wnk1;S2367	P83741;S2367	0.816124	-2.15661	2.84854	0.0067441	0.155485
Nckipsd;S122	Q9ESJ4;S122	1.15191	2.87527	2.84706	0.00677041	0.155588
Bad;S155	Q61337;S155	1.0272	0.931818	2.84138	0.00687229	0.157422
Disp2;S1317	Q8CIP5;S1317	1.24179	-1.5352	2.839	0.00691536	0.157901
Kcnb2;S461	A6H8H5;S461	-0.754568	-3.72692	-2.83612	0.0069679	0.158592
Diras2;S126	Q5PR73;S126	-0.772166	0.365034	-2.83161	0.00705083	0.159969
Esyt2;S662	Q3TZZ7;S662	1.13547	0.166717	2.82615	0.00715239	0.161316
Wbp11;S237	Q923D5;S237	0.972415	-0.843581	2.82599	0.00715549	0.161316
Bola1;S81	Q9D8S9;S81	1.06035	-1.53744	2.82371	0.00719822	0.161767
Smim13;S61	E9Q942;S61	-1.27283	0.189858	-2.81923	0.00728314	0.163161
Cacna1e;S988	Q61290;S988	-1.35239	-1.82494	-2.81654	0.00733466	0.1638
Ndrg4;S298	Q8BTG7;S298	-0.795596	4.07027	-2.81287	0.00740534	0.163837
Rundc3a;S232	O08576;S232	1.41333	0.499339	2.81508	0.00736271	0.163837
Shisa7;S287	Q8C3Q5;S287	1.43019	1.05824	2.81359	0.00739137	0.163837
Stmn2;S50	P55821;S50	1.17886	-0.0217889	2.80948	0.0074713	0.164785
Tubb6;S371	Q922F4;S371	1.2781	-2.40329	2.80816	0.00749709	0.164843
Rptor;S877	Q8K4Q0;S877	-1.06431	0.94284	-2.80594	0.00754067	0.165291
Lsm14a;S216	Q8K2F8;S216	0.812916	1.55945	2.80399	0.00757917	0.165626
Tra2b;T201	P62996;T201	1.1792	3.6655	2.80055	0.00764738	0.166605
Dock2;S1729	Q8C3J5;S1729	1.10525	-0.613274	2.79587	0.00774114	0.167975
Nav1;S810	Q8CH77;S810	1.34241	0.364159	2.79299	0.00779954	0.167975
Ppp1r1a;S67	Q9ERT9;S67	-1.72099	0.67855	-2.79274	0.00780459	0.167975
Tjp2;S1136	Q9Z0U1;S1136	0.675053	2.6186	2.7936	0.00778712	0.167975
Add1;S436	Q9QYC0;S436	0.665836	4.13813	2.78692	0.00792358	0.167999
Brsk2;S383	Q69Z98;S383	-1.35563	-0.634241	-2.78813	0.00789875	0.167999
Map2;S550	P20357;S550	1.05742	-1.21509	2.78814	0.00789866	0.167999
Pclo;S4524	Q9QYX7;S4524	1.48611	-1.03805	2.78717	0.00791849	0.167999
Rabl6;T597	Q5U3K5;T597	-1.15736	2.27436	-2.78748	0.00791225	0.167999
Dpysl2;S537	O08553;S537	1.61233	2.93578	2.7842	0.00797996	0.168692
Osbpl11;S194	Q8CI95;S194	1.10035	-0.307793	2.78037	0.00805977	0.169875
Srpk1;T448	O70551;T448	-0.794302	-1.23933	-2.77351	0.0082045	0.172416
Actb;S271	P63260;S271	-1.18597	-2.17541	-2.77074	0.00826377	0.172696
Cdk18;S75	Q04899;S75	-1.06735	-0.924003	-2.77062	0.00826634	0.172696
Arhgef25;S529	Q9CWR0;S529	0.955407	-1.29856	2.76728	0.00833815	0.173181
Tubb3;T232	Q9ERD7;T232	-1.19699	-3.36131	-2.76733	0.00833695	0.173181
Gdap1l1;S139	Q8VE33;S139	1.11839	0.119392	2.75859	0.00852789	0.175306
Gripap1;S620	Q8VD04;S620	-1.3756	-0.872385	-2.75508	0.00860568	0.175306
Itsn1;S315	Q9Z0R4;S315	1.32386	0.0614904	2.75772	0.00854696	0.175306
Kcnq3;T82	Q8K3F6;T82	0.835688	-2.18411	2.75827	0.00853492	0.175306
Plekha1;S372	Q8BUL6;S372	0.80829	-1.02476	2.75946	0.00850871	0.175306
Pvrl1;S421	Q9JKF6;S421	1.16145	1.39409	2.75505	0.00860618	0.175306
Rtn3;T524	Q9ES97;T524	-0.839793	1.14606	-2.75476	0.00861273	0.175306
Adam10;T720	O35598;T720	0.73718	-0.3679	2.74936	0.00873363	0.176784
Gabarapl2;S10	P60521;S10	-0.976726	-1.48388	-2.7493	0.00873499	0.176784
Grin2a;S1025	P35436;S1025	-0.640196	2.60852	-2.73833	0.00898586	0.180574
Lyst;S2122	P97412;S2122	-1.23222	-2.24078	-2.73971	0.00895387	0.180574
Map2;S1165	P20357;S1165	-0.880847	-1.56356	-2.737	0.00901665	0.180574
Spred1;S239	Q924S8;S239	0.902521	0.662019	2.7367	0.00902361	0.180574
Bcl11b;S664	Q99PV8;S664	0.835282	-1.35568	2.73398	0.00908693	0.180912
Srrm2;S1230	Q8BTI8;S1230	-1.17013	0.215884	-2.7338	0.0090913	0.180912
Capg;S341	P24452;S341	1.64569	-1.14466	2.7299	0.00918287	0.182188
Uba1;S876	Q02053;S876	0.758858	-0.355426	2.7289	0.00920656	0.182188
Arrb1;T410	Q8BWG8;T410	1.0191	-1.29991	2.72441	0.00931345	0.183792
Plch2;S660	A2AP18;S660	1.26729	0.0357075	2.72238	0.0093622	0.184244
Arfgap2;S145	Q99K28;S145	-0.924672	1.34362	-2.71821	0.00946286	0.184936
Mink1;S559	Q9JM52;S559	-1.34594	1.60629	-2.7177	0.00947524	0.184936
Pds5b;S1182	Q4VA53;S1182	1.22572	0.435526	2.71969	0.00942699	0.184936
Dagla;S943	Q6WQJ1;S943	-1.152	-1.68552	-2.71395	0.00956691	0.185042
Pbxip1;S164	Q3TVI8;S164	0.763717	0.616227	2.71422	0.00956019	0.185042
Pi4k2a;S462	Q2TBE6;S462	0.828675	-0.306461	2.71497	0.00954177	0.185042
Unc13a;S241	Q4KUS2;S241	-1.49856	-1.67845	-2.71323	0.00958455	0.185042
Arhgap44;S805	Q5SSM3;S805	-0.913957	2.92342	-2.70751	0.00972598	0.186258
Grin2a;S1459	P35436;S1459	1.03375	1.26643	2.70767	0.00972212	0.186258
Map4;S475	P27546;S475	1.59333	-2.18474	2.70871	0.00969627	0.186258
Osbp;S349	Q3B7Z2;S349	-1.28548	0.71223	-2.70646	0.00975229	0.186261
Pclo;S4398	Q9QYX7;S4398	-1.15534	0.254029	-2.70331	0.00983132	0.187268
Iqsec2;S464	Q5DU25;S464	0.876621	1.01998	2.70197	0.00986506	0.18741
Bcan;S414	Q61361;S414	1.59504	0.428543	2.69663	0.0100005	0.187628
Camkk1;S475	Q8VBY2;S475	1.15035	-0.0143449	2.69452	0.0100547	0.187628
Dab2ip;S702	Q3UHC7;S702	1.09021	-1.16824	2.69296	0.0100947	0.187628
Dhx30;S249	Q99PU8;S249	0.674378	-1.25423	2.6934	0.0100833	0.187628
Grasp;S384	Q9JJA9;S384	-1.03403	-0.445429	-2.69678	0.00999687	0.187628
Map1a;S991	Q9QYR6;S991	1.17513	6.24719	2.69642	0.0100061	0.187628
Ranbp2;S2505	Q9ERU9;S2505	0.812573	-0.148651	2.69372	0.0100753	0.187628
Ubap2l;S482	Q80X50;S482	-1.09714	-0.0750649	-2.69483	0.0100466	0.187628
Wdr47;S292	Q8CGF6;S292	1.55805	-1.64533	2.69223	0.0101136	0.187628
Rasgrp1;S794	Q9Z1S3;S794	-0.798348	-0.476477	-2.68567	0.0102844	0.189808
Rbm43;S141	Q99J64;S141	1.03862	-1.15609	2.6857	0.0102835	0.189808
Mark1;S46	Q8VHJ5;S46	-0.853893	-0.909305	-2.68339	0.0103444	0.190422
Kif1a;S1342	P33173;S1342	1.02642	-0.168345	2.67983	0.0104386	0.191299
Lphn1;S1439	Q80TR1;S1439	1.30001	0.277806	2.67956	0.0104457	0.191299
Clstn3;S951	Q99JH7;S951	1.24554	-0.277585	2.67716	0.0105098	0.191488
Slc2a13;S17	Q3UHK1;S17	0.848792	-1.94733	2.67772	0.0104948	0.191488
Rtn3;S673	Q9ES97;S673	1.13156	2.51475	2.6761	0.0105381	0.191514
Shank1;S63	D3YZU1;S63	-1.21621	-3.14294	-2.67255	0.0106339	0.192273
Shank1;S898	D3YZU1;S898	1.78485	2.00379	2.67257	0.0106332	0.192273
Dlgap2;S670	Q8BJ42;S670	-1.22163	-1.55052	-2.66677	0.0107913	0.192674
Rbm14;T572	Q8C2Q3;T572	-0.913846	0.0340714	-2.66699	0.0107851	0.192674
Slain2;S87	Q8CI08;S87	-1.04518	-1.82239	-2.66857	0.0107418	0.192674
Spire1;S524	Q52KF3;S524	-0.744915	-1.7467	-2.66797	0.0107583	0.192674
Tom1l1;S170	Q923U0;S170	1.07691	-0.925106	2.66844	0.0107456	0.192674
Sept9;S60	Q80UG5;S60	0.969337	-0.142992	2.66474	0.010847	0.193186
Dclk2;S222	Q6PGN3;S222	0.912569	-3.20755	2.66233	0.0109134	0.193884
Map2;S1140	P20357;S1140	-1.85159	2.11527	-2.66051	0.0109641	0.194299
Ank2;T2542	Q8C8R3;T2542	-0.805124	2.49409	-2.65756	0.0110462	0.195059
Nf1;S2517	Q04690;S2517	0.780243	-2.23393	2.65604	0.0110891	0.195059
Thy1;Y86	P01831;Y86	-0.651864	-2.25589	-2.65638	0.0110795	0.195059
Ank2;T1721	Q8C8R3;T1721	0.774624	-3.29728	2.6519	0.0112059	0.196083
Baiap2;S367	Q8BKX1;S367	-1.19177	1.07557	-2.65009	0.0112574	0.196083
Prkag2;S122	Q91WG5;S122	-0.910853	-0.896796	-2.65056	0.011244	0.196083
Tbc1d5;S546	Q80XQ2;S546	-0.815143	-1.38842	-2.65297	0.0111757	0.196083
Brsk2;S514	Q69Z98;S514	-1.13561	-0.648907	-2.64846	0.0113038	0.196411
Akr7a2;S40	Q8CG76;S40	-0.987959	-1.13833	-2.64299	0.0114614	0.197304
Gfap;S382	P03995;S382	1.29803	-2.93197	2.64403	0.0114314	0.197304
Iqsec2;S383	Q5DU25;S383	1.90528	0.953347	2.64447	0.0114187	0.197304
Lrrc7;S1338	Q80TE7;S1338	1.29476	-0.263915	2.64188	0.0114937	0.197304
Ube4b;S105	Q9ES00;S105	-1.18098	-1.17098	-2.64263	0.0114717	0.197304
Srcin1;S911	Q9QWI6;S911	-1.44123	0.109924	-2.6408	0.0115252	0.197316
Uba1;S13	Q02053;S13	1.19602	0.511287	2.63995	0.0115498	0.197316
Grin2a;S890	P35436;S890	-1.14574	-0.354556	-2.63541	0.0116831	0.199058
Rgs14;S203	P97492;S203	0.980588	1.19188	2.63363	0.0117356	0.199058
Vim;S39	P20152;S39	0.981159	-0.660516	2.63426	0.0117168	0.199058
Arhgef19;T567	Q8BWA8;T567	1.05385	1.57047	2.62974	0.0118514	0.199584
Atp2b1;S1137	G5E829;S1137	-0.772806	-1.45651	-2.62402	0.0120232	0.199584
Atxn2l;S597	Q7TQH0;S597	-0.728234	-0.000234083	-2.62581	0.0119693	0.199584
Bsn;S2858	O88737;S2858	-1.83121	2.21906	-2.63008	0.0118411	0.199584
Ehbp1;S335	Q69ZW3;S335	-1.03428	-0.399364	-2.62859	0.0118857	0.199584
Larp1;S743	Q6ZQ58;S743	-1.38409	0.175201	-2.62717	0.0119283	0.199584
Pde4d;S314	Q01063;S314	-1.29714	0.508706	-2.62232	0.0120748	0.199584
Plvap;S527	Q9D0E1;S527	-1.1815	-1.7143	-2.62366	0.0120341	0.199584
Scg5;S205	P12961;S205	0.788013	1.52843	2.62282	0.0120597	0.199584
Sik3;S533	Q6P4S6;S533	-2.64803	-0.639602	-2.62673	0.0119416	0.199584
Sorbs1;S270	Q62417;S270	1.01762	0.988625	2.63141	0.0118016	0.199584
Add2;S528	Q9QYB8;S528	-0.850484	-0.380671	-2.60948	0.0124711	0.20118
Agap2;T629	Q3UHD9;T629	1.15895	-2.15136	2.61646	0.0122542	0.20118
Arhgap32;S1588	Q811P8;S1588	-0.712358	-1.4542	-2.61501	0.012299	0.20118
Bin1;T349	O08539;T349	1.00919	2.07919	2.60649	0.012565	0.20118
Grin2b;S1061	Q01097;S1061	-1.39365	0.762123	-2.60399	0.0126441	0.20118
Ksr1;S472	Q61097;S472	0.775169	-0.416397	2.61505	0.0122979	0.20118
Map1b;S1151	P14873;S1151	1.30209	3.75315	2.60515	0.0126071	0.20118
Nbea;S999	Q9EPN1;S999	-1.25639	-0.976468	-2.60313	0.0126713	0.20118
Nrcam;S1242	Q810U4;S1242	-1.31877	-1.72321	-2.60719	0.0125428	0.20118
Pclo;S3763	Q9QYX7;S3763	1.1097	2.87556	2.61024	0.0124473	0.20118
Plch2;S662	A2AP18;S662	0.967825	-0.537787	2.61255	0.0123753	0.20118
Rnf34;S258	Q99KR6;S258	-0.7969	-1.56891	-2.60205	0.0127056	0.20118
Rufy3;S34	Q9D394;S34	0.852503	-1.89439	2.60198	0.0127079	0.20118
Sphkap;S1574	Q6NSW3;S1574	-0.862774	-0.520306	-2.60619	0.0125743	0.20118
Srrm2;S1048	Q8BTI8;S1048	-1.18424	-0.453501	-2.60873	0.0124946	0.20118
Strada;S313	Q3UUJ4;S313	-1.02641	-0.56067	-2.6022	0.0127009	0.20118
Tanc2;S238	A2A690;S238	-1.11479	-0.573329	-2.61551	0.0122835	0.20118
Tnks1bp1;S1063	P58871;S1063	-0.71383	1.29164	-2.60912	0.0124825	0.20118
Tp53bp1;S1096	P70399;S1096	0.988525	1.04477	2.60299	0.0126758	0.20118
Gabrg2;S381	P22723;S381	-0.80745	0.786519	-2.59926	0.0127948	0.201224
Pclo;S4322	Q9QYX7;S4322	0.884251	2.24845	2.60066	0.0127499	0.201224
Prkab2;S183	Q6PAM0;S183	-1.49897	0.409224	-2.59924	0.0127954	0.201224
Ncoa7;S612	Q6DFV7;S612	0.908393	-1.35849	2.59671	0.0128766	0.201406
Rapgef2;S1079	Q8CHG7;S1079	0.699086	-2.95492	2.59787	0.0128395	0.201406
Ubxn6;S442	Q99PL6;S442	1.37041	-3.32404	2.59624	0.0128918	0.201406
Usp19;S220	Q3UJD6;S220	1.04749	-0.185529	2.59045	0.0130801	0.203901
Mink1;S677	Q9JM52;S677	0.819628	2.77614	2.58828	0.0131512	0.204115
Nbea;S1776	Q9EPN1;S1776	1.11265	0.341539	2.58906	0.0131255	0.204115
Kiaa1671;S262	Q8BRV5;S262	0.991083	-2.06468	2.58603	0.0132253	0.204143
Prkce;S329	P16054;S329	-1.17324	1.59428	-2.58475	0.0132676	0.204143
Vim;S419	P20152;S419	1.45687	-2.36834	2.58518	0.0132536	0.204143
Wdr47;S296	Q8CGF6;S296	1.1484	-2.4823	2.58499	0.0132598	0.204143
Ddx42;S185	Q810A7;S185	-1.08425	0.140443	-2.58353	0.0133082	0.204326
Bag6;S986	Q9Z1R2;S986	-1.30282	-0.160526	-2.5814	0.0133791	0.204342
Kiaa1211;T949	Q5PR69;T949	-0.961621	-1.10942	-2.58092	0.0133952	0.204342
Phactr1;S467	Q2M3X8;S467	1.10364	0.0780881	2.58207	0.0133568	0.204342
Glipr1l2;S95	Q9CQ35;S95	-1.18462	1.0505	-2.57851	0.0134759	0.205133
Glipr1l2;T98	Q9CQ35;T98	-1.13777	1.07848	-2.57709	0.0135237	0.205422
Dclk1;S363	Q9JLM8;S363	0.713654	0.199442	2.57509	0.0135914	0.20601
Gstm1;S67	P10649;S67	0.770994	-3.45368	2.57397	0.0136295	0.20615
Fam134c;S26	Q9CQV4;S26	-0.997199	-1.97935	-2.57118	0.0137243	0.207143
Akap5;T220	D3YVF0;T220	-1.62755	1.34943	-2.56948	0.0137827	0.207246
Shisa6;S392	Q3UH99;S392	-0.920982	0.53998	-2.56929	0.0137893	0.207246
Actb;S52	P63260;S52	-0.859598	-0.494685	-2.56646	0.0138865	0.208224
Arhgef19;S574	Q8BWA8;S574	0.982035	1.5908	2.56383	0.0139776	0.208224
Bin1;S324	O08539;S324	0.648246	2.04341	2.56399	0.0139721	0.208224
Cdk5r1;S45	P61809;S45	0.674848	-2.80897	2.56363	0.0139846	0.208224
Kcnma1;T709	Q08460;T709	-0.819419	-1.71623	-2.56318	0.0140005	0.208224
Ddn;T399	Q80TS7;T399	-0.755858	0.422914	-2.56055	0.0140922	0.208581
Dpysl2;S540	O08553;S540	1.21979	1.30548	2.5608	0.0140835	0.208581
R3hdm2;S362	Q80TM6;S362	-0.935902	0.261433	-2.55998	0.0141123	0.208581
Irf2bpl;S638	Q8K3X4;S638	1.00552	-0.304778	2.5576	0.0141958	0.20938
Srgap3;T839	Q812A2;T839	-0.771988	-1.7872	-2.55594	0.0142546	0.209813
Sparcl1;Y349	P70663;Y349	0.737513	-0.432987	2.55458	0.0143026	0.210086
Pacsin1;S345	Q61644;S345	-1.28742	2.07518	-2.55254	0.0143753	0.21072
Atp6v1h;S59	Q8BVE3;S59	0.936493	-1.1229	2.54225	0.0147463	0.211373
Camkk1;S82	Q8VBY2;S82	1.97532	2.43105	2.5439	0.0146864	0.211373
Dclk1;T209	Q9JLM8;T209	1.09122	-3.19363	2.54588	0.0146143	0.211373
Pacs1;S779	Q8K212;S779	-1.81843	2.01299	-2.54422	0.0146747	0.211373
Prickle2;S572	Q80Y24;S572	1.00198	-1.51906	2.54304	0.0147175	0.211373
Prrt1;T103	O35449;T103	1.41407	1.10677	2.54318	0.0147126	0.211373
Shank2;S372	Q80Z38;S372	0.96289	-2.69532	2.54601	0.0146098	0.211373
Shisa6;S398	Q3UH99;S398	-0.920982	0.534085	-2.54532	0.0146347	0.211373
Slc12a6;S1064	Q924N4;S1064	-0.891497	-1.25153	-2.55015	0.0144606	0.211373
Wasf1;S310	Q8R5H6;S310	1.06335	3.2715	2.54564	0.0146233	0.211373
Wipf3;S392	P0C7L0;S392	1.42982	0.708551	2.54285	0.0147245	0.211373
Tenm4;T89	Q3UHK6;T89	-0.650942	-1.0921	-2.54109	0.0147886	0.211555
Arhgap21;S451	Q6DFV3;S451	0.703069	-0.858525	2.53546	0.0149963	0.211632
Atad1;S322	Q9D5T0;S322	0.651362	2.94272	2.53801	0.0149018	0.211632
Dlgap1;S425	Q9D415;S425	-2.30222	1.06983	-2.53684	0.0149452	0.211632
Kiaa1468;S141	Q148V7;S141	-0.807235	-1.94442	-2.5345	0.0150317	0.211632
Map9;S79	Q3TRR0;S79	-0.857368	-1.04652	-2.53571	0.014987	0.211632
Mast3;S1289	Q3U214;S1289	0.823571	0.29159	2.53499	0.0150137	0.211632
Prrt2;T74	E9PUL5;T74	-2.32246	2.26107	-2.53862	0.0148795	0.211632
Sparcl1;S155	P70663;S155	0.98819	2.83877	2.53762	0.0149162	0.211632
Cic;S778	Q924A2;S778	0.825502	-0.512961	2.53303	0.0150865	0.211892
Pag1;S247	Q3U1F9;S247	0.80436	-1.49994	2.53241	0.0151096	0.211892
Prickle2;S643	Q80Y24;S643	-0.82333	-1.76481	-2.52777	0.0152837	0.213079
Syn2;S546	Q64332;S546	0.993861	-1.50693	2.52776	0.015284	0.213079
Tnik;S899	P83510;S899	1.29594	0.525934	2.5288	0.0152449	0.213079
Hspa4;T540	Q61316;T540	-0.884552	3.50953	-2.52373	0.0154366	0.214786
Pitpnc1;S299	Q8K4R4;S299	0.978811	-0.970716	2.52077	0.0155497	0.215938
Afap1;S665	Q80YS6;S665	0.740192	-0.887152	2.51479	0.0157804	0.216608
Ank2;S1467	Q8C8R3;S1467	-0.852815	-2.37009	-2.5162	0.0157257	0.216608
Palmd;S375	Q9JHU2;S375	-1.02856	-0.274238	-2.5161	0.0157295	0.216608
Sptbn1;T2186	Q62261;T2186	0.756747	-0.890204	2.5151	0.0157681	0.216608
Srpk1;S450	O70551;S450	-0.722539	-1.25265	-2.51862	0.0156322	0.216608
Stxbp5;S783	Q8K400;S783	-1.11149	-0.933994	-2.51777	0.0156649	0.216608
Pdcl;S296	Q9DBX2;S296	-0.743177	-1.02057	-2.51305	0.0158481	0.217119
Atp2b2;T1117	Q9R0K7;T1117	1.13601	3.98176	2.50861	0.0160218	0.219077
Slc9a3r1;S264	P70441;S264	0.880007	0.461262	2.50601	0.0161246	0.220061
Amot;S1083	Q8VHG2;S1083	-0.883253	0.0371671	-2.50189	0.0162883	0.22187
Fgf13;S208	P70377;S208	-0.79485	0.756171	-2.49833	0.016431	0.222441
Frmd4a;S601	Q8BIE6;S601	0.750264	-1.64249	2.49998	0.016365	0.222441
Gsk3b;S9	Q9WV60;S9	1.30963	2.53335	2.49696	0.0164863	0.222441
Ndrg4;S306	Q8BTG7;S306	-1.04821	1.35138	-2.49717	0.0164779	0.222441
Pitpnm3;S928	Q3UHE1;S928	-0.95892	-0.181544	-2.49742	0.0164677	0.222441
Add1;T358	Q9QYC0;T358	-1.68076	3.59113	-2.49356	0.0166244	0.223039
Pclo;S4323	Q9QYX7;S4323	0.907932	2.36232	2.49355	0.0166246	0.223039
Wdfy1;S408	E9Q4P1;S408	-0.883611	-3.48417	-2.49474	0.0165762	0.223039
Nsmf;S206	Q99NF2;S206	0.986823	0.651841	2.48854	0.0168297	0.224302
Pdlim4;S111	P70271;S111	1.012	0.187774	2.48926	0.0168001	0.224302
Pkn2;T957	Q8BWW9;T957	0.865919	-0.296844	2.48701	0.0168929	0.224302
Sh3gl2;S262	Q62420;S262	-1.06009	-0.239991	-2.48682	0.0169009	0.224302
Tnik;S735	P83510;S735	0.807873	1.11305	2.48589	0.0169391	0.224302
Tnks1bp1;S796	P58871;S796	-1.00673	-0.552028	-2.48625	0.0169243	0.224302
Znrf2;S147	Q71FD5;S147	0.634008	-2.12213	2.48863	0.0168259	0.224302
Rps6ka3;S369	P18654;S369	0.728136	-1.26974	2.48433	0.0170039	0.224742
Ctnnb1;T551	Q02248;T551	1.00893	2.45587	2.48217	0.0170937	0.225093
Ppp1r3g;S81	Q9CW07;S81	-1.40376	0.310454	-2.4823	0.0170883	0.225093
Slc4a4;S257	O88343;S257	0.538432	3.18969	2.4805	0.0171638	0.225599
Add3;S42	Q9QYB5;S42	-1.09919	-1.40617	-2.47904	0.0172251	0.225969
Dpysl5;T514	Q9EQF6;T514	1.26131	2.53357	2.47832	0.0172554	0.225969
Rpl17;S142	Q9CPR4;S142	-1.0166	-0.892599	-2.47587	0.0173589	0.226908
Gpsm1;S490	Q6IR34;S490	-1.09073	-0.198778	-2.47171	0.0175358	0.2288
Aplp1;S369	Q03157;S369	1.03709	-1.20473	2.4655	0.017803	0.230292
Lpar1;T351	P61793;T351	1.00582	-1.79482	2.46597	0.0177826	0.230292
Rb1cc1;S243	Q9ESK9;S243	-0.96604	-2.42549	-2.4638	0.0178764	0.230292
Shank3;S1032	Q4ACU6;S1032	1.01003	-1.86764	2.46425	0.0178572	0.230292
Tanc1;S310	Q0VGY8;S310	-0.792793	0.499981	-2.46387	0.0178737	0.230292
Tmem100;S121	Q9CQG9;S121	0.779943	0.510009	2.46474	0.0178357	0.230292
Tubb4b;S230	P68372;S230	-0.848989	-1.42386	-2.46807	0.0176918	0.230292
Hn1;S31	P97825;S31	1.09239	0.235983	2.46155	0.0179747	0.23114
Bsn;S1486	O88737;S1486	-2.38134	1.25179	-2.45978	0.0180524	0.231398
Speg;S1177	Q62407;S1177	-0.888529	-0.663261	-2.45961	0.0180597	0.231398
Pgam1;S118	Q9DBJ1;S118	-0.701321	-1.92647	-2.45831	0.0181168	0.231713
Ankrd28;S1011	Q505D1;S1011	1.21368	-1.10498	2.45132	0.0184267	0.232351
Basp1;S131	Q91XV3;S131	-0.927519	2.70243	-2.45632	0.0182046	0.232351
Fzd2;T199	Q9JIP6;T199	-0.618068	-1.90619	-2.45455	0.0182832	0.232351
Sacs;S4266	Q9JLC8;S4266	-1.43308	-1.52243	-2.45369	0.0183211	0.232351
Shroom2;S1153	A2ALU4;S1153	0.786082	-0.963997	2.45363	0.0183239	0.232351
Snw1;S232	Q9CSN1;S232	1.11075	0.615788	2.45204	0.0183947	0.232351
Tjp2;S107	Q9Z0U1;S107	0.592373	2.47696	2.4513	0.0184276	0.232351
Ythdc1;S425	E9Q5K9;S425	-0.751537	-1.14608	-2.4515	0.0184187	0.232351
Dlgap3;T89	Q6PFD5;T89	0.86629	-0.73139	2.4473	0.0186074	0.233379
Itpr1;S1755	P11881;S1755	0.73302	2.59486	2.44836	0.0185594	0.233379
Nav1;S651	Q8CH77;S651	0.847932	-1.17316	2.44755	0.0185959	0.233379
Snap91;S621	Q61548;S621	1.04553	-0.436525	2.44526	0.0186997	0.233713
Tpd52;S223	Q62393;S223	-1.14914	-0.757274	-2.44531	0.0186971	0.233713
Amot;S693	Q8VHG2;S693	-0.69932	-0.292536	-2.44393	0.0187598	0.233852
Neo1;T1229	P97798;T1229	-0.588503	-0.1142	-2.44357	0.0187764	0.233852
Gpkow;S6	Q56A08;S6	0.943778	-1.18817	2.44268	0.0188166	0.23392
Mff;S151	Q6PCP5;S151	-1.03385	-0.135814	-2.44166	0.018863	0.23392
Phactr4;S620	Q501J7;S620	0.939651	-1.66431	2.44056	0.0189133	0.23392
Srrm2;S2351	Q8BTI8;S2351	0.987814	0.605696	2.44112	0.0188877	0.23392
Sh3glb2;S207	Q8R3V5;S207	1.0078	-0.509248	2.43659	0.019096	0.235771
Irf2bp2;S300	E9Q1P8;S300	0.891758	-0.627492	2.43332	0.0192476	0.236993
Slc1a2;S24	P43006;S24	-3.30586	0.288836	-2.43302	0.0192615	0.236993
Arrb1;S412	Q8BWG8;S412	1.18866	2.93255	2.43158	0.0193285	0.237407
Prr12;S1070	E9PYL2;S1070	0.796954	-1.55269	2.43062	0.0193732	0.237546
Arhgef7;S497	Q9ES28;S497	0.977951	2.15865	2.4275	0.0195199	0.237903
Cpne5;S575	Q8JZW4;S575	-0.88138	2.76101	-2.42645	0.0195693	0.237903
Pkp4;S514	Q68FH0;S514	-1.61744	1.47556	-2.42691	0.0195477	0.237903
Shank3;S897	Q4ACU6;S897	1.46297	0.576726	2.42854	0.0194708	0.237903
Ttll12;S11	Q3UDE2;S11	0.865612	0.629621	2.42658	0.0195632	0.237903
Dlg3;S386	P70175;S386	0.935724	2.41345	2.42422	0.0196747	0.238778
Pclo;S4016	Q9QYX7;S4016	-1.3732	-0.319283	-2.42021	0.019866	0.239467
Rab3a;S188	P63011;S188	1.05854	1.56502	2.42067	0.0198438	0.239467
Sbf1;S1228	Q6ZPE2;S1228	0.647002	-1.04338	2.42083	0.0198361	0.239467
Ubl7;S230	Q91W67;S230	-1.76794	0.208776	-2.42034	0.0198597	0.239467
Nkap;S147	Q9D0F4;S147	-1.30368	-3.03571	-2.41709	0.0200157	0.240864
Cpne5;S583	Q8JZW4;S583	-0.882761	2.75696	-2.41299	0.0202137	0.242428
Rrp1b;S7	Q91YK2;S7	1.11994	0.0320024	2.41326	0.0202007	0.242428
Csnk1d;S382	Q9DC28;S382	0.664288	-0.553323	2.40935	0.0203917	0.242448
Fam189a2;S280	Q4FZH1;S280	0.778088	-1.86028	2.40922	0.0203978	0.242448
Grin1;S890	P35438;S890	0.746638	0.649942	2.41103	0.0203093	0.242448
Macf1;S4458	Q9QXZ0;S4458	-0.652752	1.4814	-2.41186	0.0202687	0.242448
Shisa6;S434	Q3UH99;S434	1.26495	2.74165	2.40878	0.0204196	0.242448
Tnks1bp1;S1437	P58871;S1437	0.996557	-0.247028	2.40953	0.0203829	0.242448
Epb41l1;S540	Q9Z2H5;S540	-1.93895	2.22237	-2.39821	0.0209439	0.24826
Exosc5;S23	Q9CRA8;S23	0.884537	-0.340747	2.39408	0.0211521	0.250312
Nucb1;S368	Q02819;S368	0.614949	-1.24183	2.3926	0.0212271	0.250701
Pdzd8;S532	B9EJ80;S532	0.725674	-1.21246	2.39202	0.0212564	0.250701
Prkcg;S148	P63318;S148	0.867175	-1.71299	2.39135	0.0212906	0.250701
Acot11;S25	Q8VHQ9;S25	-0.779358	-1.03222	-2.38757	0.0214837	0.252558
Tmem25;S297	Q9DCF1;S297	-0.944014	-3.6138	-2.38687	0.0215198	0.252565
Crbn;S25	Q8C7D2;S25	-0.774021	-0.509867	-2.38525	0.0216035	0.252715
Pclo;S599	Q9QYX7;S599	0.922917	-0.853431	2.38546	0.0215923	0.252715
Aldoa;T255	P05064;T255	-0.721349	-2.57005	-2.38101	0.0218231	0.25413
Atp8a1;S25	P70704;S25	-1.1687	0.357747	-2.38202	0.0217707	0.25413
Cdc23;S588	Q8BGZ4;S588	0.725992	-2.02373	2.3805	0.0218495	0.25413
Hdgfrp2;S366	Q3UMU9;S366	-1.1078	-0.947161	-2.38017	0.0218672	0.25413
Itsn1;S313	Q9Z0R4;S313	1.23118	-0.100636	2.37867	0.0219455	0.254625
Ttc9b;S27	Q9D6E4;S27	1.52327	-2.02385	2.37666	0.0220509	0.255432
Brsk2;S394	Q69Z98;S394	-0.875201	0.266634	-2.3688	0.0224675	0.255974
Dlgap2;S1040	Q8BJ42;S1040	-0.757674	0.668922	-2.36964	0.0224224	0.255974
Dock10;S877	Q8BZN6;S877	0.802527	-0.67011	2.36629	0.022602	0.255974
Fam131b;S47	Q3TY60;S47	-0.751812	-0.648086	-2.36699	0.0225643	0.255974
Fxyd1;S83	Q9Z239;S83	2.27046	3.42347	2.36644	0.0225939	0.255974
Gabrg2;T386	P22723;T386	-1.07993	-3.38352	-2.36888	0.0224633	0.255974
Gclm;S59	O09172;S59	0.670853	-1.29174	2.36564	0.0226367	0.255974
Hcn3;T16	O88705;T16	0.965458	-0.980277	2.37131	0.0223334	0.255974
Mobp;S107	Q9D2P8;S107	-1.13303	-0.0639756	-2.37133	0.0223325	0.255974
Pacs1;S758	Q8K212;S758	1.58169	2.48759	2.37031	0.022387	0.255974
Pdap1;S60	Q3UHX2;S60	-1.19197	0.310964	-2.37034	0.0223853	0.255974
Prrc2a;S1217	Q7TSC1;S1217	0.972893	-0.201001	2.36717	0.0225546	0.255974
Ptpn12;S434	P35831;S434	0.564509	-1.85718	2.37385	0.0221988	0.255974
Sgip1;T25	Q8VD37;T25	-1.03757	0.317257	-2.36583	0.0226264	0.255974
Slc8a1;S389	P70414;S389	-1.29105	0.274768	-2.36629	0.0226017	0.255974
Srcin1;S569	Q9QWI6;S569	1.68572	2.15158	2.36498	0.0226726	0.255974
Myh9;T1939	Q8VDD5;T1939	-1.11708	1.08368	-2.36418	0.0227158	0.256056
Pde7b;S426	Q9QXQ1;S426	-3.46417	0.539793	-2.35961	0.0229634	0.258438
Tra2b;S264	P62996;S264	-2.50743	2.53353	-2.35576	0.0231744	0.260401
Fam126b;S416	Q8C729;S416	0.901333	-2.16215	2.35459	0.0232384	0.260709
Cacna1b;S2188	O55017;S2188	0.882424	-0.250326	2.35199	0.0233826	0.261134
Cldn11;S194	Q60771;S194	1.08011	2.05428	2.35126	0.0234229	0.261134
Prkce;S388	P16054;S388	0.485658	4.72868	2.35199	0.0233823	0.261134
Rims1;S716	Q99NE5;S716	1.40646	2.90348	2.35139	0.0234155	0.261134
Dbnl;S277	Q62418;S277	1.04332	3.23052	2.34237	0.0239206	0.261496
Epn1;S419	Q80VP1;S419	-1.02895	-0.795869	-2.34349	0.0238578	0.261496
Hdgfrp2;S367	Q3UMU9;S367	-1.10381	-0.960822	-2.34466	0.0237919	0.261496
Lppr4;T417	Q7TME0;T417	-0.874314	1.08748	-2.3443	0.0238119	0.261496
Map2;S496	P20357;S496	-0.843173	-0.259656	-2.34324	0.0238719	0.261496
Map4;S617	P27546;S617	0.871207	-2.98422	2.34362	0.0238502	0.261496
Nek6;S13	Q9ES70;S13	-0.908316	-0.253198	-2.34706	0.0236567	0.261496
Shank1;S869	D3YZU1;S869	0.92404	-1.2429	2.34216	0.0239325	0.261496
Shisa6;T458	Q3UH99;T458	0.816645	-2.64077	2.34577	0.0237292	0.261496
Snd1;S426	Q78PY7;S426	0.830586	-0.471322	2.34766	0.0236232	0.261496
Srcin1;T951	Q9QWI6;T951	1.19043	1.78694	2.34999	0.0234933	0.261496
Syngap1;S895	F6SEU4;S895	-1.04701	-1.6245	-2.34817	0.0235951	0.261496
Tmsb10;S12	Q6ZWY8;S12	-0.686877	-2.15698	-2.34239	0.0239197	0.261496
Syt7;T89	Q9R0N7;T89	-1.06043	2.16606	-2.34096	0.024001	0.261842
Gramd1b;S30	Q80TI0;S30	0.971407	-1.19292	2.33953	0.0240822	0.262327
Cpne5;S587	Q8JZW4;S587	-0.882761	2.70745	-2.33836	0.0241486	0.262648
Cdk13;T1245	Q69ZA1;T1245	0.557852	-2.16608	2.33669	0.0242443	0.262886
Mef2a;S485	Q60929;S485	0.648692	-0.920202	2.3371	0.0242204	0.262886
Begain;T263	Q68EF6;T263	-0.788712	-1.96269	-2.33287	0.0244637	0.262921
Cep170b;S709	Q80U49;S709	0.720903	-1.48314	2.33215	0.0245055	0.262921
Clip1;S203	Q922J3;S203	-0.673754	-0.105508	-2.33302	0.0244552	0.262921
Fmnl1;S184	Q9JL26;S184	0.543435	1.73488	2.33246	0.0244876	0.262921
Lmna;T548	P48678;T548	-0.860341	-0.0173941	-2.33352	0.0244264	0.262921
Pi4k2a;S51	Q2TBE6;S51	0.667608	1.36316	2.33558	0.024308	0.262921
Sars;S506	P26638;S506	-0.920319	-1.54567	-2.33168	0.0245326	0.262921
Snw1;S224	Q9CSN1;S224	1.05954	0.618679	2.3315	0.0245427	0.262921
Scn2a1;S558	B1AWN6;S558	1.30054	-0.755039	2.32928	0.0246716	0.263116
Srrm1;T913	Q52KI8;T913	-1.02947	0.0130239	-2.32928	0.0246718	0.263116
Tp53bp1;S80	P70399;S80	-1.10009	-0.39603	-2.33041	0.0246061	0.263116
Add3;S681	Q9QYB5;S681	0.945767	4.89624	2.32714	0.0247966	0.263658
Fth1;S5	P09528;S5	-0.807479	0.738835	-2.32735	0.0247843	0.263658
Nav1;S493	Q8CH77;S493	-0.801032	-0.460158	-2.32623	0.0248496	0.263828
Aldoc;S36	P05063;S36	-0.821149	-1.86356	-2.32426	0.0249653	0.264662
Kcnk1;S326	O08581;S326	0.955543	-0.927852	2.32243	0.0250731	0.26541
Grip1;S995	Q925T6;S995	0.810353	-0.555638	2.32005	0.0252137	0.266502
Abi2;S177	P62484;S177	1.18986	2.9946	2.31773	0.0253518	0.267564
Ndrg3;S333	Q9QYF9;S333	1.56582	0.213339	2.31676	0.0254092	0.267774
Cdk16;S138	Q04735;S138	0.770312	-0.763573	2.30969	0.0258346	0.270867
Clasp2;S319	Q8BRT1;S319	0.661086	0.298012	2.30936	0.0258548	0.270867
Ptges3;S151	Q9R0Q7;S151	-2.00873	-1.54427	-2.30981	0.0258275	0.270867
Serbp1;S234	Q9CY58;S234	-0.620674	1.09536	-2.31054	0.0257834	0.270867
Mief1;S59	Q8BGV8;S59	-1.19571	1.21112	-2.30724	0.0259832	0.271812
Iqsec2;S214	Q5DU25;S214	1.27908	1.70129	2.30627	0.0260429	0.272037
Srcin1;S47	Q9QWI6;S47	-1.15537	1.66686	-2.30134	0.0263448	0.274788
Cplx1;S93	P63040;S93	-1.0048	0.23207	-2.29851	0.0265203	0.275419
Epn1;S450	Q80VP1;S450	-0.945596	-1.11295	-2.29601	0.0266759	0.275419
Lrrc7;S1118	Q80TE7;S1118	-1.15397	0.840572	-2.29765	0.0265735	0.275419
Map2;S1136	P20357;S1136	-1.32069	1.99421	-2.29793	0.026556	0.275419
Marcks;S112	P26645;S112	0.839424	2.63363	2.29713	0.0266058	0.275419
Phactr1;S95	Q2M3X8;S95	0.854134	-1.76094	2.2975	0.026583	0.275419
Rims1;S211	Q99NE5;S211	-1.73481	1.84325	-2.29613	0.0266684	0.275419
Slc6a17;S682	Q8BJI1;S682	0.755197	2.07877	2.29433	0.0267804	0.276097
Dclk1;S2	Q9JLM8;S2	1.47122	-1.76679	2.29274	0.0268802	0.276727
Amigo1;S476	Q80ZD8;S476	-0.614855	-4.24168	-2.29002	0.0270516	0.276891
Eftud1;T473	Q8C0D5;T473	1.03182	0.46318	2.29109	0.0269838	0.276891
Pclo;S1772	Q9QYX7;S1772	-1.1792	3.0872	-2.29091	0.0269954	0.276891
Ppme1;S243	Q8BVQ5;S243	-1.02425	1.82647	-2.29033	0.0270321	0.276891
Atp1a3;S456	Q6PIC6;S456	-0.812908	-0.949039	-2.28534	0.0273485	0.27761
Eef1d;S133	P57776;S133	0.913472	3.62071	2.28512	0.0273625	0.27761
Isyna1;S524	Q9JHU9;S524	-0.751175	0.208623	-2.28796	0.0271821	0.27761
Lppr4;S365	Q7TME0;S365	-0.575944	-2.57389	-2.28697	0.0272445	0.27761
Rab12;S20	P35283;S20	0.615771	1.85045	2.28462	0.0273947	0.27761
Smap2;S239	Q7TN29;S239	-0.739861	0.102992	-2.28519	0.0273583	0.27761
Tle3;S286	Q08122;S286	0.610724	-0.843121	2.2859	0.0273125	0.27761
Acaca;S79	Q5SWU9;S79	-0.720822	-0.235036	-2.28292	0.0275029	0.278311
Dpysl2;S542	O08553;S542	0.748016	2.61617	2.28038	0.0276666	0.27957
Tbc1d12;S307	Q6A039;S307	0.732754	-2.516	2.27952	0.0277221	0.279734
Tubb5;S75	Q7TMM9;S75	-1.30074	-2.14041	-2.27753	0.0278505	0.280632
Grm5;S887	Q3UVX5;S887	0.763242	-0.0358671	2.27511	0.028008	0.280674
Ppp1r7;S12	Q3UM45;S12	0.802077	-0.0416346	2.27504	0.0280123	0.280674
Prkce;T710	P16054;T710	0.884975	0.0485298	2.27685	0.0278949	0.280674
Tbcel;S18	Q8C5W3;S18	-1.24943	-2.37121	-2.27558	0.0279769	0.280674
Pak7;S205	Q8C015;S205	0.898781	-2.12198	2.27421	0.0280662	0.280819
Map6;S207	Q7TSJ2;S207	0.979327	-0.275976	2.27257	0.0281738	0.281501
Phc3;S614	Q8CHP6;S614	-0.559527	-2.22179	-2.2711	0.0282699	0.282066
Bcl11b;S128	Q99PV8;S128	0.600039	-1.4216	2.26922	0.0283938	0.282602
Rap1gap2;S589	Q5SVL6;S589	-0.828651	0.446159	-2.26908	0.028403	0.282602
Bcas1;S615	Q80YN3;S615	-1.20896	-0.766918	-2.26401	0.0287391	0.283705
Chgb;S220	P16014;S220	-1.23527	2.88997	-2.26497	0.0286753	0.283705
Foxk1;S402	P42128;S402	0.860668	-0.535163	2.26562	0.0286322	0.283705
Hacd3;S114	Q8K2C9;S114	0.933645	1.8046	2.26453	0.0287042	0.283705
Irs2;S675	P81122;S675	0.949012	-0.883136	2.26627	0.0285889	0.283705
Map1a;T2182	Q9QYR6;T2182	1.97002	2.11845	2.26381	0.0287528	0.283705
Mprip;S976	P97434;S976	0.929806	0.711312	2.26107	0.028936	0.28509
Rcan1;S165	Q9JHG6;S165	-0.969936	0.543209	-2.26051	0.0289732	0.28509
Caskin1;S1332	Q6P9K8;S1332	-0.989957	1.57792	-2.25909	0.0290689	0.285637
Stim1;S567	P70302;S567	0.774682	-1.88314	2.25585	0.0292874	0.287388
Mef2c;S222	Q8CFN5;S222	0.573827	-1.12415	2.25489	0.0293528	0.287633
Map2;T1358	P20357;T1358	-1.14987	5.08244	-2.25191	0.0295557	0.288037
Snx2;S119	Q9CWK8;S119	0.728883	-2.70054	2.25216	0.029539	0.288037
Ssh2;S461	Q5SW75;S461	0.622465	0.668797	2.25283	0.0294928	0.288037
Ssh2;S487	Q5SW75;S487	0.775443	-0.536268	2.2527	0.029502	0.288037
Ralbp1;S10	Q62172;S10	0.778834	-1.00887	2.24981	0.0296999	0.288705
Slc32a1;S95	O35633;S95	1.09765	2.01606	2.24973	0.0297053	0.288705
C2cd2l;S660	Q80X80;S660	2.64868	1.21689	2.24575	0.0299795	0.289394
Clcn6;S726	O35454;S726	0.98769	-1.52636	2.24539	0.0300042	0.289394
Enah;S383	Q03173;S383	-0.88459	-0.532897	-2.24527	0.0300129	0.289394
Lphn1;T1167	Q80TR1;T1167	-0.754164	-1.31566	-2.2469	0.0298997	0.289394
Mark2;S616	Q05512;S616	0.938971	2.09606	2.2465	0.0299277	0.289394
Sept6;T418	Q9R1T4;T418	1.27334	-0.0764068	2.24516	0.03002	0.289394
Tomm70a;S94	Q9CZW5;S94	2.16546	5.22144	2.24437	0.0300753	0.289536
Caskin1;S1048	Q6P9K8;S1048	0.789147	-2.69178	2.23942	0.0304201	0.289723
Caskin1;T741	Q6P9K8;T741	1.08128	0.744774	2.23944	0.0304186	0.289723
Clip2;S974	Q9Z0H8;S974	0.620736	1.6458	2.23959	0.0304087	0.289723
Cpne5;S579	Q8JZW4;S579	-0.882761	2.70099	-2.23977	0.0303961	0.289723
Epb41l2;S38	O70318;S38	0.5546	0.652426	2.24087	0.0303191	0.289723
Kif2a;S585	P28740;S585	1.35973	2.64051	2.24139	0.0302827	0.289723
Map2;S739	P20357;S739	0.928519	5.95163	2.23949	0.0304157	0.289723
Mef2d;S231	Q63943;S231	0.997252	-2.1742	2.24166	0.0302636	0.289723
Atp1a2;S496	Q6PIE5;S496	0.908153	-0.936917	2.23802	0.0305184	0.290271
Chmp7;S232	Q8R1T1;S232	1.06829	0.125775	2.23721	0.0305755	0.290427
Dpysl2;T241	O08553;T241	-0.505743	-1.86412	-2.23602	0.0306599	0.290841
Dlg1;S575	Q811D0;S575	1.06826	1.33084	2.23171	0.0309656	0.293033
Kiaa1467;S63	Q8BYI8;S63	-1.10424	0.0190414	-2.23147	0.0309821	0.293033
Ppm1e;S495	Q80TL0;S495	-1.01044	0.427922	-2.22999	0.031088	0.293033
Rnf214;S48	Q8BFU3;S48	-0.610809	-1.32035	-2.22987	0.0310967	0.293033
Sipa1l1;S318	Q8C0T5;S318	0.737218	-0.719979	2.23008	0.0310819	0.293033
Ank3;S1462	G5E8K5;S1462	0.849559	-1.63704	2.2288	0.0311734	0.293102
Kctd12;S178	Q6WVG3;S178	0.914414	1.79038	2.22862	0.0311863	0.293102
Bsn;S3578	O88737;S3578	-0.750348	-1.03419	-2.22597	0.0313766	0.293534
Dennd1a;S473	Q8K382;S473	-0.681242	-0.279009	-2.22682	0.0313155	0.293534
Map1a;S117	Q9QYR6;S117	-0.957011	-0.429778	-2.2264	0.0313456	0.293534
Nrbp1;T433	Q99J45;T433	-0.750832	-0.392171	-2.22568	0.0313971	0.293534
Eml3;S345	Q8VC03;S345	1.07937	0.925972	2.22345	0.0315588	0.294274
Slc4a10;S1057	Q5DTL9;S1057	-1.13661	0.25216	-2.22368	0.0315417	0.294274
Cacng3;S302	Q9JJV5;S302	0.953149	-0.545977	2.22276	0.0316084	0.294351
Pclo;S3616	Q9QYX7;S3616	0.582136	2.1275	2.22216	0.031652	0.294372
Macf1;S5988	Q9QXZ0;S5988	-0.845568	-0.215775	-2.21982	0.0318226	0.295225
Syn1;S494	O88935;S494	0.852026	-0.0343125	2.21976	0.0318266	0.295225
Ttyh1;S440	Q9D3A9;S440	-0.811078	-1.32685	-2.21905	0.031879	0.295326
Tprg1l;S10	Q9DBS2;S10	-0.784254	2.73265	-2.21744	0.0319965	0.29603
Bsn;T55	O88737;T55	0.876178	0.742402	2.21654	0.0320628	0.296174
Lppr4;S685	Q7TME0;S685	-0.619622	-1.52832	-2.2161	0.0320952	0.296174
Abl2;S632	Q4JIM5;S632	0.569834	-0.649993	2.21222	0.0323814	0.297861
Ensa;S43	P60840;S43	1.06077	-0.650086	2.21244	0.0323653	0.297861
Trim3;S427	Q9R1R2;S427	0.562092	0.0875285	2.21192	0.0324035	0.297861
Dlg3;S513	P70175;S513	0.996963	-0.811204	2.20966	0.0325716	0.299021
Ak5;S108	Q920P5;S108	-1.36717	0.0746077	-2.20672	0.0327916	0.300385
Kcna4;S586	Q61423;S586	-0.918577	-0.876305	-2.20654	0.0328046	0.300385
Astn1;S274	Q61137;S274	0.794574	-0.742189	2.1964	0.0335729	0.304317
Camkk1;S52	Q8VBY2;S52	0.790682	1.57652	2.19686	0.0335378	0.304317
Cdc42ep4;S116	Q9JM96;S116	0.936687	-0.87515	2.19525	0.0336612	0.304317
Dlg2;S328	Q91XM9;S328	1.54674	1.9985	2.19588	0.0336125	0.304317
Fmnl2;S1015	A2APV2;S1015	-0.618404	0.60547	-2.19888	0.0333836	0.304317
Hbb-b1;S88	P02088;S88	-0.61057	-1.50563	-2.19597	0.0336057	0.304317
Kcnq3;S579	Q8K3F6;S579	0.803703	-0.840602	2.19637	0.0335755	0.304317
Syngap1;S374	F6SEU4;S374	-1.27097	1.07096	-2.19923	0.0333573	0.304317
Trim3;S7	Q9R1R2;S7	1.08349	2.19792	2.19611	0.0335948	0.304317
Zeb2;S1122	Q9R0G7;S1122	0.815384	-1.15738	2.19536	0.033653	0.304317
Kcnab2;S9	P62482;S9	0.735818	1.60373	2.19456	0.0337142	0.304411
Ank2;S2090	Q8C8R3;S2090	-0.714749	1.34877	-2.19197	0.0339132	0.305182
Micall1;S496	Q8BGT6;S496	0.615002	-1.83996	2.19178	0.0339281	0.305182
Srrm2;S1996	Q8BTI8;S1996	-0.737059	1.33682	-2.19287	0.033844	0.305182
Tanc2;S1831	A2A690;S1831	-0.964432	-1.43387	-2.19031	0.0340418	0.305818
Bcas1;S347	Q80YN3;S347	0.633203	2.27921	2.18953	0.0341026	0.305979
Scn2a1;S606	B1AWN6;S606	1.60826	0.5062	2.18519	0.0344402	0.308233
Syn3;S404	Q8JZP2;S404	1.00859	-1.13542	2.18519	0.0344404	0.308233
Atf2;S94	P16951;S94	1.41495	-3.39073	2.18391	0.0345411	0.30839
Larp1;S81	Q6ZQ58;S81	0.475301	2.80817	2.18386	0.0345446	0.30839
Ksr1;T256	Q61097;T256	0.619037	1.04401	2.18237	0.0346616	0.308661
Ptges3;S148	Q9R0Q7;S148	-1.93852	-1.56682	-2.18246	0.034655	0.308661
Fnbp1l;S489	Q8K012;S489	2.10685	-0.0144678	2.18172	0.0347128	0.308732
Mon1a;S31	Q6PDG8;S31	0.901063	-1.45493	2.18052	0.034808	0.309193
Kbtbd11;S186	Q8BNW9;S186	0.887407	-2.68763	2.17813	0.034997	0.30991
Lppr4;S366	Q7TME0;S366	-0.551477	-2.57395	-2.1773	0.0350629	0.30991
Specc1l;S888	Q2KN98;S888	0.710088	-1.80863	2.17738	0.0350564	0.30991
Uchl3;S130	Q9JKB1;S130	0.627308	-1.96056	2.17838	0.0349775	0.30991
Nedd4l;S512	Q8CFI0;S512	0.764131	0.181259	2.17669	0.0351117	0.309957
Dis3l2;S864	Q8CI75;S864	0.67237	2.42008	2.17311	0.035398	0.312099
Trim36;S105	Q80WG7;S105	0.799188	-0.572168	2.1717	0.0355107	0.312705
Irf2bp2;S343	E9Q1P8;S343	0.804922	-1.16855	2.17056	0.035603	0.31313
Ttc7b;S677	E9Q6P5;S677	-1.21351	-1.8467	-2.16795	0.0358136	0.314595
Kctd16;S146	Q5DTY9;S146	-0.61003	0.603293	-2.16674	0.0359119	0.31507
Syn1;T339	O88935;T339	-1.01238	0.176396	-2.16482	0.0360681	0.31605
Ccdc86;S18	Q9JJ89;S18	0.614104	-2.51259	2.16217	0.0362845	0.31639
Gpr162;S413	Q3UN16;S413	0.473118	0.538542	2.16327	0.0361945	0.31639
Pak1;T219	O88643;T219	1.0233	-0.0299322	2.16262	0.0362475	0.31639
Tiam1;S231	Q60610;S231	-0.985489	0.376161	-2.16222	0.0362802	0.31639
Pex5l;S388	Q8C437;S388	-0.528228	0.952563	-2.16085	0.0363927	0.316946
Nf1;S866	Q04690;S866	0.991022	0.220238	2.15993	0.0364686	0.317219
Dock4;S1640	P59764;S1640	0.605638	-1.03049	2.15711	0.0367019	0.318859
Dlg2;S553	Q91XM9;S553	-0.752261	-0.885962	-2.1565	0.0367523	0.318906
Ranbp2;S2729	Q9ERU9;S2729	-1.36497	0.865025	-2.15596	0.0367969	0.318906
Epb41l3;T923	Q9WV92;T923	0.504287	2.56575	2.15526	0.0368549	0.319021
Cpne6;S556	Q9Z140;S556	-0.825039	2.17789	-2.15313	0.0370323	0.31978
Mapt;T504	P10637;T504	0.891778	1.18752	2.15313	0.0370322	0.31978
Pip5k1c;S655	O70161;S655	-1.15977	1.05852	-2.15237	0.0370962	0.319943
Srrm2;S1998	Q8BTI8;S1998	-0.737059	1.32541	-2.15106	0.0372058	0.320501
Stx6;S2	Q9JKK1;S2	1.10403	-0.947208	2.15015	0.0372816	0.320766
Arhgef2;S163	Q60875;S163	0.645078	0.682658	2.14885	0.037391	0.320937
Nlk;T298	O54949;T298	-0.625392	-1.77145	-2.14884	0.0373916	0.320937
Apeh;S187	Q8R146;S187	-0.667239	-1.30051	-2.14732	0.0375203	0.321267
Dlg2;Y348	Q91XM9;Y348	1.09672	-0.410629	2.14733	0.0375195	0.321267
Cdc42ep1;S121	Q91W92;S121	0.975528	-1.95695	2.14522	0.0376978	0.322106
Map1b;S336	P14873;S336	-1.8631	1.6027	-2.14509	0.0377086	0.322106
Atxn2;T710	O70305;T710	0.751742	-1.81196	2.14431	0.0377746	0.322148
Dlg4;S422	Q62108;S422	1.11056	0.755557	2.14397	0.037804	0.322148
Lmtk3;S232	Q5XJV6;S232	-0.647427	-0.422776	-2.14324	0.0378654	0.322286
Gorasp2;T222	Q99JX3;T222	-0.535298	-2.69368	-2.14245	0.0379329	0.322475
Arhgap23;T325	Q69ZH9;T325	1.43564	0.539002	2.14122	0.0380384	0.322986
Epb41l3;S547	Q9WV92;S547	-0.85649	-0.472534	-2.1406	0.0380912	0.323028
Gas2l1;S297	Q8JZP9;S297	0.876769	0.414688	2.1401	0.038134	0.323028
Cstf3;S691	Q99LI7;S691	-0.848134	0.380332	-2.13938	0.0381953	0.323163
Gys1;S657	Q9Z1E4;S657	-0.736472	1.59998	-2.13819	0.0382974	0.323259
Hnrnpul1;S195	Q8VDM6;S195	0.656946	0.286605	2.13842	0.0382779	0.323259
Clasp2;S884	Q8BRT1;S884	-0.765676	-0.624489	-2.13766	0.0383433	0.323264
Mark3;S469	Q03141;S469	0.842107	-0.628866	2.13709	0.0383923	0.323294
Nup160;S1123	Q9Z0W3;S1123	-0.660008	-1.15022	-2.13496	0.0385765	0.324462
Tnks1bp1;S1373	P58871;S1373	-1.08137	-1.27436	-2.13214	0.038821	0.326133
Doc2a;S226	Q7TNF0;S226	-0.742738	-1.10156	-2.12974	0.0390301	0.327504
Sobp;S627	Q0P5V2;S627	0.708511	-0.625979	2.12548	0.0394042	0.330254
Hist1h1b;S18	P43276;S18	0.560953	2.42343	2.12379	0.0395531	0.330392
Mief1;S94	Q8BGV8;S94	0.883613	-0.753308	2.12372	0.0395598	0.330392
Tjp2;S1133	Q9Z0U1;S1133	0.615419	-0.723069	2.12405	0.0395302	0.330392
Jph1;S157	Q9ET80;S157	-0.602407	-1.61939	-2.12022	0.0398706	0.331473
Nefh;S834	P19246;S834	0.522746	4.82058	2.12016	0.0398754	0.331473
Pitpnm3;S319	Q3UHE1;S319	-0.606482	-1.03441	-2.12096	0.0398042	0.331473
Synj1;T1055	Q8CHC4;T1055	0.626396	-1.92965	2.12146	0.0397601	0.331473
Cfl1;S3	P18760;S3	1.50418	0.525675	2.11964	0.0399221	0.331475
Ano8;S637	Q6PB70;S637	-0.68681	0.792359	-2.1136	0.0404635	0.331511
Apba1;S317	B2RUJ5;S317	1.0205	0.271632	2.11407	0.0404211	0.331511
Arhgap21;S453	Q6DFV3;S453	0.793324	-0.535996	2.11164	0.0406409	0.331511
Basp1;S192	Q91XV3;S192	-0.980181	1.11131	-2.11324	0.0404963	0.331511
Cacnb1;S59	Q8R3Z5;S59	1.762	1.09628	2.11105	0.040694	0.331511
Caskin1;S637	Q6P9K8;S637	-1.21454	-0.727841	-2.10628	0.0411287	0.331511
Cyb5b;S33	Q9CQX2;S33	-0.697769	-2.10955	-2.1134	0.0404814	0.331511
Eml3;T326	Q8VC03;T326	1.00171	0.94227	2.10587	0.0411662	0.331511
Ermn;S211	Q5EBJ4;S211	0.520857	2.75884	2.11614	0.0402345	0.331511
Glcci1;S293	Q8K3I9;S293	-1.09768	-1.50189	-2.11879	0.0399981	0.331511
H1foo;T178	Q8VIK3;T178	0.571708	-2.50966	2.10765	0.0410036	0.331511
Hspb8;S87	Q9JK92;S87	0.711899	-1.38134	2.10593	0.0411608	0.331511
Kcnab2;S14	P62482;S14	-0.732926	-0.0513064	-2.11165	0.0406395	0.331511
Kcnb1;S519	Q03717;S519	0.981666	-0.616334	2.10866	0.0409115	0.331511
Kiaa1211;S409	Q5PR69;S409	-1.10126	-0.760063	-2.11553	0.0402902	0.331511
Mast4;S1465	Q811L6;S1465	1.02513	-0.535766	2.10569	0.0411829	0.331511
Mef2d;S251	Q63943;S251	0.618536	2.01351	2.11628	0.0402225	0.331511
Ncam1;S946	P13595;S946	0.54888	1.23065	2.11279	0.0405364	0.331511
Pclo;S1808	Q9QYX7;S1808	-2.00288	-1.01992	-2.10887	0.040892	0.331511
Pkm;S519	P52480;S519	-0.791734	-2.83037	-2.10699	0.0410635	0.331511
Ppfia2;S260	Q8BSS9;S260	-0.694547	0.918043	-2.11763	0.0401016	0.331511
Shisa7;S455	Q8C3Q5;S455	0.886418	-1.01499	2.11727	0.0401335	0.331511
Slc1a2;S3	P43006;S3	-0.614237	-1.13592	-2.10805	0.0409674	0.331511
Srrm2;S1834	Q8BTI8;S1834	-0.704792	-1.30797	-2.10714	0.0410501	0.331511
Sv2a;S80	Q9JIS5;S80	-2.67052	0.598863	-2.10595	0.0411588	0.331511
Syn1;T512	O88935;T512	1.07763	5.27863	2.1106	0.0407347	0.331511
Zc3h4;S1104	Q6ZPZ3;S1104	1.04448	0.190125	2.10976	0.0408117	0.331511
Srrm2;S531	Q8BTI8;S531	-0.722261	0.666518	-2.10422	0.0413174	0.332218
Arfgef2;S1036	A2A5R2;S1036	-0.657028	-1.79671	-2.10107	0.0416076	0.332795
Dync1i1;S162	O88485;S162	0.767537	2.29128	2.10256	0.0414709	0.332795
Ralgapb;S414	Q8BQZ4;S414	0.858403	0.313642	2.10165	0.0415546	0.332795
Syn3;S540	Q8JZP2;S540	0.548975	3.46311	2.10091	0.0416228	0.332795
Tbc1d10b;S664	Q8BHL3;S664	0.701322	0.905321	2.10107	0.0416078	0.332795
Syngap1;S765	F6SEU4;S765	2.16195	-0.503697	2.09917	0.0417841	0.333711
Arhgap23;S316	Q69ZH9;S316	-0.995483	0.111073	-2.09774	0.0419165	0.334394
Nop56;S543	Q9D6Z1;S543	-0.630396	0.0284135	-2.09715	0.0419721	0.334462
Syn1;S510	O88935;S510	0.829785	4.7409	2.09631	0.04205	0.334709
Fam126b;S508	Q8C729;S508	0.764732	-1.17136	2.09511	0.042162	0.335226
Pclo;S4042	Q9QYX7;S4042	0.926211	-0.993284	2.09338	0.042324	0.335764
Ssh3;S38	Q8K330;S38	0.788731	0.283522	2.09345	0.0423178	0.335764
Pde1a;S3	Q61481;S3	-0.985146	-1.51259	-2.09266	0.0423924	0.335932
Gng3;T5	P63216;T5	1.08819	3.26383	2.09023	0.0426204	0.337329
Map1a;S1205	Q9QYR6;S1205	-1.30533	3.29864	-2.08893	0.0427439	0.337329
Sh3kbp1;S555	Q8R550;S555	1.08389	0.386781	2.08966	0.0426745	0.337329
Tpd52l2;S12	Q9CYZ2;S12	0.908564	1.53675	2.08878	0.042758	0.337329
Dlgap1;S437	Q9D415;S437	-1.92228	1.22696	-2.08757	0.0428727	0.337859
Atg2b;S1015	Q80XK6;S1015	-0.934711	-0.532489	-2.08668	0.0429569	0.338149
Ablim1;T586	Q8K4G5;T586	0.683993	-0.142711	2.08593	0.0430282	0.338275
Cldn11;S198	Q60771;S198	2.69598	4.39462	2.08552	0.0430678	0.338275
Tubb2a;S35	Q7TMM9;S35	-0.705705	-1.12567	-2.0847	0.0431456	0.338513
Rogdi;S227	Q3TDK6;S227	-0.915568	-0.375845	-2.08414	0.0431996	0.338564
Atp2b1;T1165	G5E829;T1165	-0.61919	-0.268318	-2.07849	0.043742	0.339084
Dync1h1;S4366	Q9JHU4;S4366	0.53062	1.32463	2.08106	0.0434945	0.339084
Ehd1;S456	Q9WVK4;S456	-0.857866	-2.47777	-2.07946	0.0436482	0.339084
Fam117b;T12	Q3U3E2;T12	0.73231	-2.06746	2.08044	0.0435539	0.339084
Fam21;T322	Q6PGL7;T322	0.579787	-1.214	2.08176	0.0434269	0.339084
Fnbp1l;S488	Q8K012;S488	-0.910993	1.46438	-2.08252	0.043354	0.339084
Pclo;S4290	Q9QYX7;S4290	-1.09425	0.176992	-2.07888	0.0437045	0.339084
Rell2;S187	Q8BRJ3;S187	-1.17846	-2.70751	-2.07944	0.0436506	0.339084
Sorbs2;S130	Q3UTJ2;S130	0.871498	0.0676107	2.07853	0.0437382	0.339084
Syngap1;S1183	F6SEU4;S1183	-0.909294	0.377625	-2.08056	0.0435421	0.339084
Cacna1b;T1909	O55017;T1909	-0.465875	-0.766567	-2.07739	0.0438488	0.339542
Map1b;S1371	P14873;S1371	-1.24966	-0.0238977	-2.07639	0.0439455	0.339921
Dagla;S835	Q6WQJ1;S835	-0.843114	-2.14249	-2.07554	0.0440275	0.340187
Tnks1bp1;S1611	P58871;S1611	-0.941428	-0.124746	-2.07456	0.0441233	0.340558
Snap29;S65	Q9ERB0;S65	0.661721	-2.09793	2.07345	0.0442309	0.341019
Mef2a;S253	Q60929;S253	0.935246	-0.579789	2.07296	0.0442789	0.341019
Mobp;S98	Q9D2P8;S98	-0.780774	0.924412	-2.0721	0.0443629	0.341298
Arhgap39;S719	P59281;S719	-0.789225	-3.34567	-2.07081	0.0444896	0.341401
Mapk8;Y185	Q91Y86;Y185	1.16233	1.765	2.07078	0.044492	0.341401
Shank1;S615	D3YZU1;S615	-0.690531	-0.420617	-2.0705	0.0445202	0.341401
Brsk2;S424	Q69Z98;S424	-1.42206	1.17084	-2.06779	0.0447867	0.342707
Dync1i1;S80	O88485;S80	0.679154	-1.32313	2.06814	0.044752	0.342707
Hcn2;S750	O88703;S750	-1.32141	-0.143098	-2.06522	0.0450406	0.343564
Map2;T1781	P20357;T1781	-1.30036	1.3943	-2.0651	0.0450525	0.343564
Syngap1;S1027	F6SEU4;S1027	-1.37188	1.61746	-2.0647	0.0450916	0.343564
Syngap1;T369	F6SEU4;T369	-0.996766	0.434956	-2.0654	0.0450229	0.343564
Apc;S742	Q61315;S742	0.890931	0.201752	2.06366	0.0451957	0.343622
Pde1a;T4	Q61481;T4	-0.988436	-1.52559	-2.0641	0.0451518	0.343622
Atl1;S23	Q8BH66;S23	-0.938559	0.0747178	-2.06308	0.0452524	0.343687
Camk2b;T321	P28652;T321	-1.22331	-0.555167	-2.06095	0.0454656	0.343759
Gja1;S325	P23242;S325	1.38909	3.04224	2.06091	0.0454696	0.343759
Kiaa1109;S1436	A2AAE1;S1436	1.01615	0.758966	2.06082	0.0454782	0.343759
Mtdh;T96	Q80WJ7;T96	0.65416	0.279934	2.06045	0.045515	0.343759
Nfia;S310	Q02780;S310	0.719061	-1.28936	2.06145	0.0454153	0.343759
Rrp1b;S8	Q91YK2;S8	0.996498	-0.0165786	2.06009	0.0455514	0.343759
Gprin1;S495	Q3UNH4;S495	1.11702	1.0079	2.05576	0.0459864	0.345942
Hepacam;T297	Q640R3;T297	-0.618707	-0.434559	-2.05621	0.0459411	0.345942
Syn1;S666	O88935;S666	0.597377	5.58645	2.05627	0.0459346	0.345942
Klc1;S523	O88447;S523	-0.688712	-1.19302	-2.05446	0.046118	0.346566
Apba1;S250	B2RUJ5;S250	-1.27644	0.321329	-2.0532	0.0462455	0.347152
Prrc2b;S415	Q7TPM1;S415	0.695478	-1.3261	2.05273	0.0462934	0.347152
Arhgap35;S985	Q91YM2;S985	-0.853134	0.489395	-2.05192	0.0463748	0.347397
Asap1;S540	Q9QWY8;S540	-0.820591	0.653523	-2.05089	0.0464802	0.34782
Kcnj3;S368	P63250;S368	0.717331	-2.11517	2.05038	0.0465324	0.347846
Oxr1;T72	Q4KMM3;T72	0.732282	-1.02311	2.04958	0.0466139	0.34809
Pclo;S1642	Q9QYX7;S1642	-1.12616	-0.570492	-2.04715	0.0468623	0.349212
Prrc2a;S454	Q7TSC1;S454	0.428528	0.62665	2.04759	0.0468176	0.349212
Gfap;T40	P03995;T40	0.869772	0.148935	2.04611	0.0469692	0.349644
Baiap2;S260	Q8BKX1;S260	-0.801305	-3.2668	-2.04526	0.0470567	0.349929
Rac1;T167	P63001;T167	-1.13175	-2.80791	-2.04454	0.0471304	0.350111
Arfgap1;T135	Q9EPJ9;T135	-0.8042	-0.25148	-2.04055	0.0475433	0.350362
Astn1;S906	Q61137;S906	-1.56933	-0.669366	-2.04038	0.0475609	0.350362
Ccny;T37	Q8BGU5;T37	-1.01836	-0.14805	-2.04144	0.0474513	0.350362
Dlgap4;S415	B1AZP2;S415	-0.521278	0.989047	-2.04268	0.0473225	0.350362
Epb41l3;S451	Q9WV92;S451	0.743261	0.977411	2.04172	0.0474228	0.350362
Irgq;S319	Q8VIM9;S319	0.499013	-3.05635	2.03994	0.0476068	0.350362
Pdha1;S293	P35486;S293	0.757661	5.34079	2.04025	0.0475753	0.350362
Raver1;S14	Q9CW46;S14	0.997716	2.05585	2.04285	0.0473052	0.350362
Tpd52;S175	Q62393;S175	0.511392	2.69963	2.04209	0.0473836	0.350362
Rims2;S479	Q9EQZ7;S479	-0.697247	-1.37511	-2.03906	0.0476985	0.350675
Ag2;S217	Q3UPL5;S217	0.72316	-1.23023	2.03539	0.0480825	0.353134
Dmtn;S96	Q9WV69;S96	0.798952	1.56906	2.0342	0.0482075	0.353687
Tjp2;S968	Q9Z0U1;S968	0.563666	-0.556718	2.03071	0.0485753	0.356019
Dmxl2;S1141	Q8BPN8;S1141	-0.997144	0.157197	-2.02992	0.048659	0.356266
Ube4b;S1136	Q9ES00;S1136	0.667031	-1.09919	2.028	0.0488628	0.357391
Atp5o;S129	Q9DB20;S129	-0.746253	-4.00269	-2.02606	0.0490694	0.3578
Jph3;S188	Q9ET77;S188	-0.757049	0.0206195	-2.02623	0.0490519	0.3578
Pak2;S64	Q8CIN4;S64	0.536469	-2.11831	2.02653	0.0490192	0.3578
Map7d1;S282	A2AJI0;S282	0.713454	-1.67737	2.02391	0.0492998	0.359113
Epn1;S416	Q80VP1;S416	2.20963	2.29384	2.02136	0.0495745	0.360744
Gphn;S270	Q8BUV3;S270	1.11979	2.22003	2.01973	0.0497496	0.361429
Srrm2;T1812	Q8BTI8;T1812	-0.727517	-0.220566	-2.01954	0.0497701	0.361429
Camk2b;T401	P28652;T401	0.684637	1.83538	2.01777	0.0499624	0.361884
Fam65b;S46	Q80U16;S46	0.579149	-0.726344	2.01709	0.0500359	0.361884
Fat3;S900	Q8BNA6;S900	0.886272	4.18288	2.01731	0.0500117	0.361884
Pkp4;S446	Q68FH0;S446	0.617807	0.774331	2.01712	0.050033	0.361884
Cacnb1;S547	Q8R3Z5;S547	0.549654	-1.24337	2.01597	0.0501572	0.361976
Nf1;S2525	Q04690;S2525	0.849576	0.851625	2.01557	0.0502011	0.361976
Specc1;S55	Q5SXY1;S55	0.762582	2.818	2.0162	0.050132	0.361976
Cacna1e;T2225	Q61290;T2225	0.79611	-2.22033	2.00718	0.0511217	0.363656
Carhsp1;S33	Q9CR86;S33	0.960511	0.892788	2.01048	0.0507582	0.363656
Ccdc136;S50	Q3TVA9;S50	-1.21138	-1.56103	-2.00714	0.0511268	0.363656
Cnksr2;S325	Q80YA9;S325	0.530309	1.09063	2.01149	0.0506466	0.363656
Dact3;S10	Q0PHV7;S10	-1.12859	-2.00551	-2.01125	0.0506738	0.363656
Dnajc5;T11	P60904;T11	-1.01984	-2.98224	-2.01152	0.0506442	0.363656
Gnb2;S2	P62880;S2	-1.42332	-0.583329	-2.00694	0.0511487	0.363656
Mapk8ip1;S6	Q9WVI9;S6	0.998255	-0.246427	2.00878	0.0509452	0.363656
Mkl1;T488	Q8K4J6;T488	-0.757325	-0.320083	-2.00904	0.0509163	0.363656
Nppb;S109	P40753;S109	0.69734	1.69968	2.00839	0.0509887	0.363656
Pclo;S4129	Q9QYX7;S4129	0.828368	-0.740746	2.00805	0.0510262	0.363656
Rabl6;T601	Q5U3K5;T601	-0.898931	-0.876087	-2.00939	0.0508775	0.363656
Rasgrf2;S725	P70392;S725	0.591323	0.540534	2.00978	0.050835	0.363656
Shisa7;S304	Q8C3Q5;S304	-0.613832	0.133294	-2.01218	0.0505716	0.363656
Lrrc4b;S689	P0C192;S689	0.801063	-2.18061	2.00478	0.0513885	0.364997
Inpp5f;S879	Q8CDA1;S879	0.778394	-1.20837	2.00227	0.0516681	0.366617
Larp1;T503	Q6ZQ58;T503	0.516996	0.370358	2.00142	0.0517627	0.366923
Dst;S3896	Q91ZU6;S3896	0.631366	0.0387027	1.99878	0.0520585	0.367815
Prkce;S344	P16054;S344	-1.10326	1.26088	-1.99849	0.0520917	0.367815
Psd3;S1009	Q2PFD7;S1009	-0.488035	4.09496	-1.99846	0.0520951	0.367815
Tnik;S678	P83510;S678	0.538574	2.09541	1.99956	0.0519717	0.367815
Dcc;S1178	P70211;S1178	0.997867	2.01955	1.99559	0.0524181	0.369729
Arhgap39;S380	P59281;S380	1.38496	-2.56958	1.99149	0.052884	0.370735
Arhgef6;S487	Q8K4I3;S487	0.899432	-0.353439	1.99219	0.0528041	0.370735
Bclaf1;S510	Q8K019;S510	0.623106	1.3319	1.99165	0.0528655	0.370735
Cep170b;S881	Q80U49;S881	1.12743	-1.60436	1.98823	0.0532562	0.370735
Eif3j2;S16	Q66JS6;S16	1.16743	0.0563583	1.98613	0.0534974	0.370735
Foxk1;S406	P42128;S406	0.765753	-0.548406	1.98672	0.0534296	0.370735
Gsk3a;S278	Q2NL51;S278	0.650878	-0.289241	1.98806	0.053276	0.370735
Hist1h1c;S2	P15864;S2	0.519968	-0.590277	1.9915	0.0528824	0.370735
Kcnab2;S20	P62482;S20	-0.616199	1.23511	-1.98789	0.0532952	0.370735
Kiaa0195;S445	Q7TSH8;S445	1.2006	1.55226	1.98933	0.0531303	0.370735
Map1a;S1008	Q9QYR6;S1008	0.779851	3.4108	1.98806	0.0532764	0.370735
Nfix;S361	P70257;S361	-0.561826	-1.70366	-1.98959	0.0531008	0.370735
Nhsl2;T284	B1AXH1;T284	0.630684	-1.00997	1.99245	0.052774	0.370735
Pds5b;S1255	Q4VA53;S1255	-0.496844	-0.751488	-1.99096	0.0529439	0.370735
Prrt3;S895	Q6PE13;S895	-0.792317	1.8936	-1.98815	0.053265	0.370735
Rph3a;S680	P47708;S680	-0.475451	3.01972	-1.98652	0.053453	0.370735
Rtn1;S70	Q8K0T0;S70	1.0742	0.206764	1.98727	0.0533665	0.370735
Sparcl1;S70	P70663;S70	-1.15371	0.427252	-1.99058	0.0529873	0.370735
Ulk2;S430	Q9QY01;S430	0.576529	-1.40929	1.98526	0.0535981	0.371072
Atl1;S15	Q8BH66;S15	-1.09467	-0.964979	-1.98148	0.0540346	0.371369
Gramd3;S265	Q6PEM6;S265	-0.837666	-2.48146	-1.98196	0.0539792	0.371369
Gys1;S653	Q9Z1E4;S653	-0.689481	1.56067	-1.98235	0.0539335	0.371369
Hdgf;S133	P51859;S133	-0.816626	0.00779994	-1.98395	0.0537486	0.371369
Neo1;S1245	P97798;S1245	0.968912	-0.336862	1.98116	0.0540726	0.371369
Reep1;S152	Q8BGH4;S152	1.82702	-0.317529	1.98083	0.0541102	0.371369
Rem2;S334	Q8VEL9;S334	-0.679728	0.0425304	-1.983	0.053859	0.371369
Rtn3;S230	Q9ES97;S230	-1.34938	2.75011	-1.98442	0.0536952	0.371369
Wdr47;S297	Q8CGF6;S297	0.930058	0.0639247	1.98282	0.05388	0.371369
Bmpr2;S515	O35607;S515	0.861307	0.21806	1.97975	0.0542357	0.371872
Atat1;S315	Q8K341;S315	0.902017	-1.51984	1.97786	0.0544562	0.372309
Rims1;S1027	Q99NE5;S1027	-0.668968	0.859149	-1.97792	0.0544491	0.372309
Terf2;S367	O35144;S367	0.603683	-2.01225	1.97868	0.0543612	0.372309
Map3k7;S412	Q62073;S412	0.683913	0.635331	1.97714	0.0545413	0.372533
Bsn;S834	O88737;S834	-0.934857	-1.21863	-1.972	0.0551451	0.373761
Cnksr2;T327	Q80YA9;T327	0.958565	0.0748978	1.9726	0.055074	0.373761
Dpysl5;S538	Q9EQF6;S538	0.972596	-0.128666	1.97166	0.055185	0.373761
Fbxo42;S365	Q6PDJ6;S365	0.78214	-0.0419428	1.97304	0.0550224	0.373761
Fyttd1;S23	Q91Z49;S23	0.86822	-1.95687	1.97402	0.0549069	0.373761
Limch1;S719	Q3UH68;S719	0.54247	0.989782	1.97508	0.054782	0.373761
Nos1;S1412	Q9Z0J4;S1412	0.637398	-1.54648	1.9724	0.055098	0.373761
Synpo;S805	Q8CC35;S805	0.731122	0.825986	1.97159	0.0551932	0.373761
Tubb4b;T366	P68372;T366	0.779346	-1.67775	1.97359	0.0549575	0.373761
Anapc4;S779	Q91W96;S779	-0.639683	-0.106497	-1.96725	0.0557086	0.374055
Asap2;S704	Q7SIG6;S704	-0.493548	1.58738	-1.96691	0.055749	0.374055
Bsn;S2649	O88737;S2649	-0.883158	-1.1939	-1.96886	0.0555167	0.374055
Eif3j1;T114	Q66JS6;T114	0.621684	-1.54071	1.96897	0.0555038	0.374055
Grin2b;S882	Q01097;S882	0.681335	-0.774812	1.9701	0.0553701	0.374055
Gsk3b;S389	Q9WV60;S389	0.531193	1.93341	1.96804	0.0556151	0.374055
Nrcam;S1178	Q810U4;S1178	0.605857	0.890774	1.96712	0.0557243	0.374055
Sash1;S400	P59808;S400	0.584169	-0.805913	1.96976	0.0554098	0.374055
Tkt;T287	P40142;T287	0.561116	-3.11841	1.96681	0.0557617	0.374055
Znf318;S205	Q99PP2;S205	-0.778884	-2.23731	-1.97001	0.0553802	0.374055
Gfap;T380	P03995;T380	1.14405	-2.79523	1.96293	0.056226	0.375204
Gtpbp1;S8	O08582;S8	-0.560384	2.18559	-1.96356	0.0561504	0.375204
Kalrn;S469	A2CG49;S469	-1.09045	0.250218	-1.96451	0.0560359	0.375204
Nfasc;S1231	Q810U3;S1231	-0.962012	-0.450964	-1.9627	0.0562533	0.375204
Rtn3;S597	Q9ES97;S597	-1.63035	0.400404	-1.96383	0.0561181	0.375204
Sv2a;S81	Q9JIS5;S81	-2.43376	0.750978	-1.9623	0.0563017	0.375204
Synj1;S1249	Q8CHC4;S1249	0.729547	1.37302	1.96312	0.0562024	0.375204
Arhgef7;S135	Q9ES28;S135	-1.01069	-0.281685	-1.96173	0.0563695	0.375305
Stx1a;S14	O35526;S14	-0.978625	2.56671	-1.95996	0.0565827	0.376373
Arhgef17;S219	Q80U35;S219	0.7723	0.20426	1.95866	0.0567409	0.376622
Hepacam;S280	Q640R3;S280	-0.554341	2.93463	-1.95835	0.0567783	0.376622
Ilf3;S382	Q9Z1X4;S382	1.60584	-3.28926	1.95834	0.0567787	0.376622
Nefh;T839	P19246;T839	0.531832	3.97146	1.95777	0.0568489	0.376736
Dmxl2;S1152	Q8BPN8;S1152	-0.819149	-1.37111	-1.95669	0.05698	0.376944
Psd3;S1003	Q2PFD7;S1003	-0.780359	3.55952	-1.95664	0.056986	0.376944
Cad;S1406	B2RQC6;S1406	0.622173	-2.06344	1.95326	0.0573971	0.378959
Eps15l1;S108	Q60902;S108	0.754438	-1.17837	1.9536	0.0573558	0.378959
Ppp1r2;S122	Q9DCL8;S122	-0.876756	-0.159175	-1.95165	0.0575953	0.379916
Dlg4;S418	Q62108;S418	-1.00496	-1.55724	-1.94897	0.0579248	0.379978
Lppr4;S404	Q7TME0;S404	1.03307	0.626835	1.94997	0.0578011	0.379978
Prkar1a;S83	Q9DBC7;S83	0.80592	3.06254	1.95089	0.0576884	0.379978
Prkcg;S330	P63318;S330	-0.928686	1.5297	-1.94917	0.0579	0.379978
Sacs;S1781	Q9JLC8;S1781	-0.748292	-1.31551	-1.94974	0.0578299	0.379978
Tanc1;S64	Q0VGY8;S64	-1.17136	-2.82386	-1.95051	0.0577345	0.379978
Ank3;S1114	G5E8K5;S1114	-0.891453	-2.05891	-1.94683	0.0581881	0.380912
Git1;S507	Q68FF6;S507	-0.941147	-4.07779	-1.94664	0.0582116	0.380912
Kctd8;S77	Q50H33;S77	0.894011	-1.02847	1.94651	0.0582275	0.380912
Epb41l2;S116	O70318;S116	0.548988	-0.50878	1.94551	0.0583525	0.381379
Add2;S602	Q9QYB8;S602	-0.558854	3.43143	-1.94224	0.0587584	0.382969
Camk2b;T400	P28652;T400	-0.815677	-0.366528	-1.93968	0.0590788	0.382969
Dpysl3;T509	Q62188;T509	1.25226	4.36086	1.93975	0.0590706	0.382969
Map1s;T571	Q8C052;T571	-0.904913	0.292795	-1.93925	0.0591334	0.382969
Mfap3l;S298	Q9D3X9;S298	0.740373	-0.136592	1.94102	0.0589108	0.382969
Pak4;T207	Q8BTW9;T207	0.572029	-1.33741	1.93948	0.0591038	0.382969
Prkci;T411	Q62074;T411	-0.703011	-0.511206	-1.94094	0.0589213	0.382969
Purg;S342	Q8R4E6;S342	-1.17016	0.718281	-1.94115	0.0588944	0.382969
Rab11fip5;S640	Q8R361;S640	-0.55539	-2.06015	-1.94216	0.0587691	0.382969
Sos1;S1120	Q62245;S1120	0.531732	-1.25215	1.94086	0.0589314	0.382969
Pitpnm3;S946	Q3UHE1;S946	-0.458851	1.02267	-1.93813	0.0592738	0.38353
Cspg5;S467	Q71M36;S467	0.932285	-0.961701	1.9354	0.059617	0.384421
Marcksl1;S93	P28667;S93	0.539619	2.94958	1.93532	0.0596274	0.384421
Ptpn12;S588	P35831;S588	0.845753	0.495431	1.93582	0.0595645	0.384421
Shank3;S1163	Q4ACU6;S1163	0.913775	-1.57843	1.93588	0.0595575	0.384421
Srrm2;T973	Q8BTI8;T973	0.70265	-0.446318	1.93483	0.0596894	0.384473
Amer2;S71	Q8CCJ4;S71	-1.15623	-2.91688	-1.93337	0.0598744	0.384792
Cttn;T401	Q60598;T401	0.467865	5.80019	1.93316	0.0599009	0.384792
Pnn;S346	O35691;S346	-0.795941	-0.277995	-1.93337	0.0598743	0.384792
Plekhm3;S132	Q8BM47;S132	0.98868	-2.49768	1.93201	0.060047	0.385199
Slc7a14;S735	Q8BXR1;S735	-0.696866	-2.40577	-1.93181	0.0600724	0.385199
Cmip;S377	Q9D486;S377	0.558872	-1.41187	1.93086	0.0601933	0.385627
Kif21a;S1660	Q9QXL2;S1660	-0.626047	-0.537936	-1.92928	0.0603948	0.38657
Srrm1;S220	Q52KI8;S220	0.34637	2.43504	1.92556	0.0608721	0.389002
Uba1;S835	Q02053;S835	0.539217	2.26558	1.92547	0.060884	0.389002
Oxr1;S336	Q4KMM3;S336	-1.58991	-0.0134574	-1.92414	0.0610544	0.389741
Palm;T141	Q9Z0P4;T141	-1.0749	3.56252	-1.92255	0.0612602	0.390705
Bai1;S1552	Q3UHD1;S1552	0.893735	-2.46313	1.92194	0.0613391	0.390858
Dgkb;S418	Q6NS52;S418	1.10132	4.54255	1.92137	0.0614126	0.390972
Tanc1;S462	Q0VGY8;S462	-0.712754	-1.4029	-1.92096	0.0614667	0.390972
Ckb;T255	Q04447;T255	0.711531	-3.10426	1.91967	0.0616334	0.391683
Bsn;S241	O88737;S241	0.922162	1.2947	1.91852	0.0617829	0.392283
Ildr2;S584	B5TVM2;S584	-0.962215	-0.883018	-1.91742	0.0619267	0.392846
Prkcb;T642	P68404;T642	-0.702366	-0.15021	-1.91568	0.0621539	0.393937
Anapc4;T781	Q91W96;T781	-0.704725	-0.21782	-1.90982	0.0629254	0.394266
Ank2;T3785	Q8C8R3;T3785	1.08129	2.55059	1.913	0.0625065	0.394266
Arhgap21;S314	Q6DFV3;S314	-0.598443	2.13997	-1.91128	0.0627329	0.394266
Bclaf1;S383	Q8K019;S383	-0.742432	-0.710322	-1.91187	0.0626541	0.394266
Cep170b;S1032	Q80U49;S1032	-0.706862	-0.390308	-1.91114	0.0627508	0.394266
Gtpbp1;S44	O08582;S44	-0.893936	0.268942	-1.91224	0.0626065	0.394266
Scaf8;S617	Q6DID3;S617	0.540789	2.2862	1.9103	0.0628625	0.394266
Serinc1;S364	Q9QZI8;S364	0.649674	1.12509	1.91067	0.0628131	0.394266
Srrm2;S1810	Q8BTI8;S1810	-0.727517	-0.264292	-1.90983	0.0629242	0.394266
Srrm2;S2404	Q8BTI8;S2404	0.51471	-1.77692	1.91312	0.0624895	0.394266
Srrm2;S533	Q8BTI8;S533	-0.658548	0.659294	-1.91363	0.0624226	0.394266
Syngap1;S873	F6SEU4;S873	1.24337	-1.48756	1.91118	0.0627463	0.394266
Top2b;T1562	Q64511;T1562	-1.53369	-1.40106	-1.91048	0.062838	0.394266
Bsn;S1493	O88737;S1493	-0.990473	1.25477	-1.90787	0.0631838	0.394994
Hnrnpc;S121	Q9Z204;S121	-1.02357	-1.25374	-1.90769	0.0632079	0.394994
Rapgef2;S1119	Q8CHG7;S1119	-0.87888	1.51234	-1.9083	0.0631268	0.394994
Cnnm2;S749	Q3TWN3;S749	-0.697331	0.00161233	-1.90718	0.0632762	0.395074
Enah;T315	Q03173;T315	-0.5788	-1.60938	-1.90636	0.0633848	0.395406
Akt1;S124	P31750;S124	0.82035	0.207018	1.90579	0.0634604	0.395531
Dlgap1;S421	Q9D415;S421	-0.924313	-0.902361	-1.902	0.0639681	0.398347
Dmxl2;S1144	Q8BPN8;S1144	-1.35971	-0.391613	-1.90053	0.0641654	0.399226
Myo18a;S2037	Q9JMH9;S2037	0.741269	-0.654715	1.89893	0.0643804	0.399911
Pdap1;S63	Q3UHX2;S63	-0.778684	0.00780476	-1.89888	0.0643877	0.399911
Mfsd8;S18	Q8BH31;S18	0.763529	-1.33281	1.89841	0.064451	0.399955
Atp1a1;S228	Q8VDN2;S228	1.36363	2.36455	1.89691	0.0646539	0.400008
Dpysl5;S534	Q9EQF6;S534	0.83531	-0.112593	1.89678	0.064672	0.400008
Map1b;S1325	P14873;S1325	-1.73135	1.91529	-1.89775	0.0645403	0.400008
Slc4a7;S1008	Q8BTY2;S1008	0.668735	0.624069	1.89669	0.0646841	0.400008
Cep170;S1296	Q6A065;S1296	-0.635224	-2.97014	-1.89527	0.0648763	0.400106
Ndrg2;S352	Q9QYG0;S352	-0.834068	-0.434143	-1.89491	0.0649245	0.400106
Syn1;S702	O88935;S702	1.08699	-0.967248	1.89576	0.0648096	0.400106
Syne1;S8284	Q6ZWR6;S8284	-0.716603	-1.6576	-1.89551	0.0648433	0.400106
Mapt;S490	P10637;S490	-1.85131	2.14015	-1.89368	0.065093	0.400603
Sqstm1;S24	Q64337;S24	0.646074	0.240205	1.8935	0.0651177	0.400603
Pde1b;S18	Q01065;S18	-0.47369	-1.69219	-1.89263	0.0652355	0.400636
Syngap1;S117	F6SEU4;S117	-0.672122	3.59057	-1.89288	0.0652017	0.400636
Scn1a;S586	A2APX8;S586	0.707287	-1.08541	1.89156	0.0653813	0.401186
Eml3;S177	Q8VC03;S177	0.51242	-3.32523	1.89026	0.0655593	0.401932
Mllt4;S512	Q9QZQ1;S512	0.509168	-2.07617	1.88973	0.0656321	0.402032
Git1;T508	Q68FF6;T508	-0.924954	-4.11514	-1.88895	0.0657399	0.402175
Mal2;S2	Q8BI08;S2	-0.588378	-2.25274	-1.88833	0.0658249	0.402175
Map2;T1260	P20357;T1260	1.16623	0.102099	1.88862	0.0657843	0.402175
Akap12;T910	Q9WTQ5;T910	-0.859277	-1.92902	-1.88227	0.066663	0.405327
Dopey2;S597	Q3UHQ6;S597	0.859103	-1.47373	1.88316	0.0665385	0.405327
Nav1;S544	Q8CH77;S544	0.593799	-0.148114	1.88172	0.0667391	0.405327
Nr2c2;T352	P49117;T352	-0.441787	-2.7483	-1.88272	0.0666003	0.405327
Sh3kbp1;S631	Q8R550;S631	0.819078	-0.0438275	1.88193	0.0667102	0.405327
Shank2;T485	Q80Z38;T485	0.724093	-2.73442	1.88279	0.0665902	0.405327
Trappc12;S309	Q8K2L8;S309	0.464802	0.733732	1.88282	0.0665869	0.405327
Ttc9b;S114	Q9D6E4;S114	0.597457	0.161222	1.88111	0.0668246	0.405501
Add1;S366	Q9QYC0;S366	-0.935984	-0.382187	-1.87953	0.0670444	0.405823
Kif2a;S584	P28740;S584	-1.11296	2.45281	-1.87944	0.0670572	0.405823
Nppb;S111	P40753;S111	0.679875	1.689	1.88027	0.0669413	0.405823
Tcf20;S994	Q9EPQ8;S994	0.705646	-1.47443	1.87909	0.0671055	0.405823
Apc;S2674	Q61315;S2674	0.724113	0.143175	1.87663	0.0674511	0.407222
Snap25;S154	P60879;S154	-0.553191	-2.42349	-1.87668	0.0674433	0.407222
Myh10;S1952	Q61879;S1952	-0.820015	0.0510255	-1.87592	0.0675502	0.407475
Cacng8;S357	Q8VHW2;S357	0.747043	0.0371299	1.87356	0.0678833	0.408102
Gigyf2;S237	Q6Y7W8;S237	-0.860702	0.451615	-1.87412	0.0678034	0.408102
Hid1;S593	Q8R1F6;S593	-0.493452	1.16363	-1.87374	0.0678574	0.408102
Ppfia2;S774	Q8BSS9;S774	-0.49531	1.14048	-1.87381	0.0678477	0.408102
Actb;S323	P63260;S323	0.746769	0.393832	1.87264	0.0680134	0.408218
Ncam2;S765	O35136;S765	0.880861	2.10779	1.87261	0.0680172	0.408218
Fam171b;S414	Q14CH0;S414	0.707289	0.711811	1.87107	0.0682346	0.409178
Kcnc1;S468	P15388;S468	-0.572894	-0.433854	-1.86682	0.0688403	0.410827
Myo18a;S2016	Q9JMH9;S2016	-0.790853	3.8108	-1.86671	0.0688558	0.410827
Pclo;S4132	Q9QYX7;S4132	-0.580572	0.353307	-1.86625	0.0689217	0.410827
Pnpla6;S346	Q3TRM4;S346	0.860059	-1.80878	1.86766	0.06872	0.410827
Srcin1;S366	Q9QWI6;S366	0.873096	-0.566304	1.86591	0.0689709	0.410827
Srgap3;S868	Q812A2;S868	-0.474759	0.640986	-1.866	0.0689579	0.410827
Srrm2;T1836	Q8BTI8;T1836	-0.579772	-1.27094	-1.86706	0.0688054	0.410827
Svop;S31	Q8BFT9;S31	-0.628343	2.57152	-1.86658	0.0688748	0.410827
Cep170b;S653	Q80U49;S653	-0.714505	-1.92929	-1.86453	0.0691682	0.411658
Caskin1;S358	Q6P9K8;S358	-0.677786	-0.738572	-1.86411	0.0692286	0.411673
Tsc2;S664	Q61037;S664	0.530294	-2.257	1.86343	0.0693265	0.411912
Ppp1r7;S48	Q3UM45;S48	-0.736613	0.907433	-1.86277	0.0694211	0.41213
Kiaa1109;S2603	A2AAE1;S2603	0.690504	0.177469	1.86136	0.0696243	0.412992
Rap1gap2;S594	Q5SVL6;S594	-0.551974	0.63263	-1.85951	0.0698907	0.414228
Eif3b;S123	Q8JZQ9;S123	-0.628895	1.92041	-1.85838	0.0700546	0.414854
Slc6a15;S701	Q8BG16;S701	0.77798	-0.872159	1.85755	0.0701757	0.415226
Eif3b;S120	Q8JZQ9;S120	-0.628895	1.92436	-1.85709	0.0702415	0.41527
Csrp1;S192	P97315;S192	0.546899	0.272925	1.85658	0.0703164	0.415368
Arhgef7;S132	Q9ES28;S132	-0.858432	1.86106	-1.8533	0.0707944	0.417782
Map2;S1352	P20357;S1352	-0.731076	5.5362	-1.85258	0.070901	0.417782
Sh3pxd2b;S528	A2AAY5;S528	1.20416	-2.47391	1.85286	0.0708599	0.417782
Magi2;S726	Q9WVQ1;S726	-0.491643	-1.22052	-1.84991	0.0712925	0.419395
Purb;S6	O35295;S6	-0.820036	1.64921	-1.85027	0.0712396	0.419395
Epb41l1;T78	Q9Z2H5;T78	0.954916	0.936633	1.84802	0.0715708	0.42003
Slc6a15;S687	Q8BG16;S687	0.695107	-0.673321	1.84798	0.0715773	0.42003
Snap91;S613	Q61548;S613	-0.734784	-2.07129	-1.84848	0.0715037	0.42003
Col4a3bp;S377	Q9EQG9;S377	-1.00102	-1.92724	-1.84727	0.0716814	0.420229
Smim13;S59	E9Q942;S59	-0.764817	0.721104	-1.84695	0.0717291	0.420229
Arhgap31;S272	A6X8Z5;S272	0.607242	-1.51188	1.84345	0.0722478	0.421378
Daam2;S704	Q80U19;S704	0.635884	0.25813	1.843	0.072316	0.421378
Map1a;S2637	Q9QYR6;S2637	-0.723617	2.11216	-1.84517	0.0719922	0.421378
Map1b;S339	P14873;S339	-1.54982	0.190117	-1.84382	0.0721928	0.421378
Prkar1a;S77	Q9DBC7;S77	0.653584	1.91147	1.84264	0.0723699	0.421378
Rph3a;S271	P47708;S271	0.723523	3.51702	1.84244	0.0723984	0.421378
Tnks1bp1;S807	P58871;S807	0.62286	-0.137165	1.8425	0.0723894	0.421378
Vcl;S290	Q64727;S290	-0.685327	-0.0871025	-1.84464	0.0720719	0.421378
Acin1;S989	Q9JIX8;S989	0.516489	-2.14017	1.83844	0.0729972	0.422199
Add2;T392	Q9QYB8;T392	0.567524	-2.23299	1.83751	0.0731371	0.422199
Agfg1;S181	Q8K2K6;S181	0.902308	2.00115	1.83715	0.0731914	0.422199
Atp2a2;S663	O55143;S663	-0.654862	1.20196	-1.8408	0.0726435	0.422199
Dennd5a;T1079	Q6PAL8;T1079	-0.87187	-0.404512	-1.8402	0.0727336	0.422199
Frmd4a;S712	Q8BIE6;S712	0.498379	-0.169694	1.83753	0.0731347	0.422199
Luzp1;S612	Q8R4U7;S612	1.02373	-1.13049	1.84001	0.0727618	0.422199
Nsmf;S166	Q99NF2;S166	-0.445723	1.0223	-1.83794	0.0730727	0.422199
Pclo;S3545	Q9QYX7;S3545	0.42264	1.87064	1.83928	0.0728712	0.422199
Sparcl1;S78	P70663;S78	-0.782207	-0.099231	-1.83986	0.0727848	0.422199
Sphkap;S1244	Q6NSW3;S1244	0.782942	-0.75029	1.83885	0.0729358	0.422199
Zbtb7a;S331	O88939;S331	-0.565429	-0.428379	-1.83491	0.0735295	0.423806
Srrm2;S2084	Q8BTI8;S2084	-0.571174	-2.42482	-1.83439	0.0736074	0.423912
Baiap2;T341	Q8BKX1;T341	0.67467	0.553741	1.83343	0.0737532	0.424073
Srrm2;T955	Q8BTI8;T955	0.567205	-2.39792	1.83342	0.0737544	0.424073
Vim;S56	P20152;S56	0.759669	-1.24704	1.83262	0.0738766	0.424433
Apbb1;S517	Q9QXJ1;S517	-0.543236	-1.92391	-1.83167	0.0740202	0.424573
Med22;S173	Q62276;S173	0.61895	-0.394953	1.83184	0.0739937	0.424573
Camsap1;S502	A2AHC3;S502	0.586037	-0.687466	1.83095	0.0741291	0.424697
Dgkq;S22	Q6P5E8;S22	0.690881	0.164183	1.82996	0.0742802	0.424697
Dnajc6;S481	Q80TZ3;S481	-0.790036	5.13644	-1.83021	0.0742426	0.424697
Specc1;S111	Q5SXY1;S111	0.47981	-3.02821	1.83054	0.0741918	0.424697
Rras2;S186	P62071;S186	0.71838	2.2264	1.82856	0.0744944	0.425438
Zbtb18;S321	Q9WUK6;S321	0.650272	-0.812748	1.82833	0.0745292	0.425438
Hecw2;S858	Q6I6G8;S858	-0.646404	-0.640776	-1.82595	0.0748935	0.426492
Shank3;T1234	Q4ACU6;T1234	0.583216	0.96347	1.82607	0.0748751	0.426492
Svop;S25	Q8BFT9;S25	-0.974214	2.21428	-1.82651	0.0748076	0.426492
Ablim3;T542	Q69ZX8;T542	0.781516	-2.18426	1.81513	0.0765694	0.427664
Arfgap1;S347	Q9EPJ9;S347	-0.676535	0.909591	-1.81928	0.0759239	0.427664
Arhgap33;S1144	Q80YF9;S1144	-0.537784	-1.49197	-1.81938	0.0759071	0.427664
Brsk1;S432	Q5RJI5;S432	0.587983	-0.897823	1.81821	0.0760887	0.427664
Bsn;S3436	O88737;S3436	0.888382	0.293041	1.821	0.075657	0.427664
Bsn;S3512	O88737;S3512	-1.13066	-0.170607	-1.81748	0.0762033	0.427664
Cend1;S10	Q9JKC6;S10	0.894063	3.40061	1.81641	0.0763701	0.427664
Iqsec2;T227	Q5DU25;T227	0.691153	0.392016	1.81698	0.0762811	0.427664
Kif21a;S524	Q9QXL2;S524	0.853664	0.981045	1.81684	0.0763022	0.427664
L1cam;S1166	P11627;S1166	-0.658794	-0.936253	-1.81893	0.0759782	0.427664
Map1a;S995	Q9QYR6;S995	1.13778	0.673356	1.81625	0.0763953	0.427664
Mpdz;S908	Q8VBX6;S908	0.704085	-0.118219	1.81902	0.075963	0.427664
Ncoa7;S682	Q6DFV7;S682	-0.594851	-0.947738	-1.82229	0.0754565	0.427664
Pclo;T4064	Q9QYX7;T4064	0.706509	-1.43039	1.81557	0.0765011	0.427664
Psip1;T122	Q99JF8;T122	-0.576175	2.26081	-1.81917	0.0759404	0.427664
Ralgapa1;T753	Q6GYP7;T753	0.723456	-2.74647	1.815	0.0765899	0.427664
Rph3a;S262	P47708;S262	0.614945	1.43726	1.81577	0.0764701	0.427664
Sfr1;S67	Q8BP27;S67	0.349658	3.23603	1.81809	0.0761088	0.427664
Sgsm1;S646	Q8BPQ7;S646	0.700974	0.0095694	1.82093	0.0756677	0.427664
Shank1;S783	D3YZU1;S783	0.677103	-1.90344	1.82073	0.0756985	0.427664
Sipa1l1;S1116	Q8C0T5;S1116	0.670267	1.60081	1.81921	0.0759343	0.427664
Slc14a1;S4	Q8VHL0;S4	0.578922	-1.90857	1.81484	0.0766151	0.427664
Snph;S200	Q80U23;S200	-0.762006	0.56478	-1.81678	0.0763122	0.427664
Speg;S531	Q62407;S531	0.5501	-2.07412	1.82227	0.0754595	0.427664
Stx1b;S58	P61264;S58	-0.605116	-0.112279	-1.81455	0.0766601	0.427664
Tjp2;S239	Q9Z0U1;S239	0.597693	2.66448	1.82214	0.0754804	0.427664
Gprin1;S771	Q3UNH4;S771	0.689719	0.485858	1.81333	0.0768514	0.428076
Prkcg;S373	P63318;S373	0.649711	-0.289214	1.81331	0.0768541	0.428076
Cds2;S20	Q99L43;S20	-0.800783	0.71594	-1.81075	0.0772571	0.428977
Napg;S284	Q9CWZ7;S284	-0.905706	3.27418	-1.81037	0.0773169	0.428977
Ncl;S577	P09405;S577	-0.556955	-1.58182	-1.81075	0.0772571	0.428977
Rab3a;S190	P63011;S190	0.789328	1.44459	1.81075	0.077257	0.428977
Tmpo;T159	Q61029;T159	1.32158	2.50274	1.81118	0.0771898	0.428977
Sh2d5;S421	Q8JZW5;S421	0.531171	1.02463	1.80921	0.0775007	0.429662
Lamtor1;T28	Q9CQ22;T28	0.658332	-0.716749	1.80745	0.077778	0.430864
Tbc1d10b;S673	Q8BHL3;S673	0.584625	2.43366	1.80588	0.0780281	0.431913
Efr3a;S692	Q8BG67;S692	0.487365	1.09161	1.80249	0.0785677	0.432882
Eps15l1;S558	Q60902;S558	0.829189	1.13809	1.80406	0.0783169	0.432882
Pclo;S212	Q9QYX7;S212	0.41247	2.32715	1.80333	0.0784344	0.432882
Rtn4;S836	Q99P72;S836	-1.6487	0.831433	-1.80264	0.0785443	0.432882
Tra2b;S266	P62996;S266	-1.94653	2.47205	-1.80319	0.0784553	0.432882
Wfs1;T5	P56695;T5	1.05791	1.08004	1.80364	0.0783837	0.432882
Prpsap1;S215	Q9D0M1;S215	-1.04501	0.235458	-1.80197	0.0786515	0.433009
Grin2a;S882	P35436;S882	0.581435	2.14089	1.80135	0.0787504	0.433218
Cttn;S417	Q60598;S417	-1.04295	4.86512	-1.80073	0.07885	0.433356
Map1a;S2281	Q9QYR6;S2281	0.665798	1.00449	1.80043	0.078897	0.433356
Fam117b;S452	Q3U3E2;S452	-0.622059	-0.881156	-1.79906	0.0791174	0.433564
Nsf;S343	P46460;S343	-0.748698	-0.596438	-1.79961	0.0790299	0.433564
Srcin1;S411	Q9QWI6;S411	0.417098	4.44385	1.79935	0.0790716	0.433564
Caskin1;S893	Q6P9K8;S893	-1.22845	0.980767	-1.79762	0.0793499	0.434169
Myo18a;T978	Q9JMH9;T978	0.588758	-2.98456	1.79774	0.0793292	0.434169
Snx1;S188	Q9WV80;S188	0.508001	-2.27204	1.79697	0.079454	0.434406
Ctnnd2;S471	O35927;S471	0.442626	3.69662	1.79557	0.0796809	0.435312
Ccdc88a;S1677	Q5SNZ0;S1677	0.865685	-3.16584	1.79444	0.0798625	0.43597
Pclo;T1760	Q9QYX7;T1760	-1.3206	2.45056	-1.7938	0.0799673	0.436029
Znf185;S18	Q62394;S18	0.882849	-1.31096	1.79362	0.0799958	0.436029
Ap3d1;S760	O54774;S760	-0.468684	2.48987	-1.79273	0.0801401	0.436482
Map1b;S1204	P14873;S1204	-0.538064	2.63765	-1.79235	0.0802025	0.436488
Rab3b;S188	Q9CZT8;S188	0.755567	0.00522133	1.79155	0.0803325	0.436862
Ahcyl2;S25	Q68FL4;S25	0.945854	1.05136	1.7868	0.0811084	0.440745
Camk2a;T305	P11798;T305	-0.445797	-3.34551	-1.78579	0.0812756	0.44098
Ppm1k;S248	Q8BXN7;S248	0.570374	-0.869633	1.78613	0.0812183	0.44098
Cpeb3;S197	Q7TN99;S197	0.730688	-0.122991	1.78143	0.0819951	0.443959
Tyro3;S859	P55144;S859	-0.643003	-0.261146	-1.78133	0.0820115	0.443959
Usp24;S1138	B1AY13;S1138	0.495471	0.351988	1.78207	0.0818879	0.443959
Synj1;S1053	Q8CHC4;S1053	-1.26736	3.05684	-1.78052	0.0821452	0.444345
Kcnj3;S369	P63250;S369	0.604058	-2.11283	1.77938	0.0823348	0.445033
Fgf12;S212	P61329;S212	0.483991	0.769234	1.779	0.0823984	0.445039
Sparcl1;S353	P70663;S353	0.59313	0.54328	1.77756	0.082638	0.445764
Srgap3;S837	Q812A2;S837	-0.498226	2.46406	-1.77744	0.0826578	0.445764
Prrt2;T72	E9PUL5;T72	1.21411	0.0544658	1.77645	0.0828231	0.4461
Zc2hc1a;T242	Q8BJH1;T242	-0.684415	-0.761932	-1.77631	0.0828454	0.4461
Aak1;T651	Q3UHJ0;T651	0.514376	1.89529	1.77537	0.0830039	0.446616
Prrc2a;T825	Q7TSC1;T825	-0.77399	-0.405277	-1.77455	0.0831407	0.447014
Zc3h14;S515	Q8BJ05;S515	0.556982	-0.0243168	1.77266	0.0834583	0.448384
Dlg2;S550	Q91XM9;S550	-0.408408	-2.22967	-1.7705	0.0838221	0.449753
Dnal1;S56	Q05A62;S56	-0.423804	-0.0757777	-1.77039	0.0838395	0.449753
Camk2a;T306	P11798;T306	-0.452606	-3.18616	-1.76964	0.0839672	0.4501
Srsf9;S212	Q9D0B0;S212	0.703055	0.0866088	1.76879	0.0841097	0.450524
Bcas1;S601	Q80YN3;S601	0.404065	1.90416	1.76702	0.0844107	0.451248
Map2;S915	P20357;S915	0.912953	-1.26411	1.76704	0.084407	0.451248
Tpmt;S2	O55060;S2	-0.51579	-0.995851	-1.76688	0.0844348	0.451248
Dmwd;S658	Q08274;S658	0.585681	-1.72769	1.76547	0.0846746	0.451935
Lrfn2;S742	Q80TG9;S742	-0.668792	-0.867656	-1.76537	0.0846902	0.451935
Aida;S161	Q8C4Q6;S161	0.605958	-2.12349	1.76197	0.0852716	0.454357
Rcan1;S161	Q9JHG6;S161	-0.684719	-0.140926	-1.76226	0.0852207	0.454357
Rapgef2;S935	Q8CHG7;S935	0.66211	-0.977731	1.76155	0.0853437	0.454401
Kcnq2;S681	Q9Z351;S681	0.411154	1.08311	1.76021	0.0855727	0.45528
Cacng8;S257	Q8VHW2;S257	0.639075	-0.312219	1.75925	0.0857378	0.455461
Map2;S1788	P20357;S1788	-1.24202	3.57941	-1.7589	0.0857986	0.455461
Usp9x;S2547	P70398;S2547	0.672084	-0.0919472	1.75908	0.0857667	0.455461
Nyap2;S154	Q8BM65;S154	-0.668392	0.174562	-1.75726	0.0860807	0.456279
Tubb4b;S75	P68372;S75	-0.547449	-2.01695	-1.75743	0.0860512	0.456279
Atp5a1;S502	Q03265;S502	0.598101	-2.40019	1.75605	0.0862901	0.456656
Camk2b;S371	P28652;S371	0.866155	1.07325	1.75563	0.0863619	0.456656
Map4k4;T187	Q9JM52;T187	-0.736319	-0.904474	-1.75617	0.0862689	0.456656
Scrib;S1331	Q80U72;S1331	0.702	-0.372715	1.7551	0.0864534	0.456656
Shisa7;S317	Q8C3Q5;S317	0.710646	-1.12652	1.75499	0.0864723	0.456656
Prkcd;S662	P28867;S662	0.938453	-2.41296	1.75405	0.086636	0.457181
Aprt;S15	P08030;S15	0.588109	-4.58014	1.75366	0.0867028	0.457195
Edc4;S712	Q3UJB9;S712	0.569117	-0.255214	1.75266	0.0868776	0.45744
Map2k2;S23	Q63932;S23	0.847965	-0.50501	1.75284	0.0868451	0.45744
Pitpnm2;S321	Q6ZPQ6;S321	-0.836294	2.41506	-1.75214	0.0869681	0.457578
Amph;S250	Q7TQF7;S250	-1.03168	2.00627	-1.75094	0.0871762	0.457861
Hivep2;S1023	Q3UHF7;S1023	-0.587948	-0.661752	-1.75125	0.0871233	0.457861
Slc6a17;T722	Q8BJI1;T722	0.803801	2.19522	1.75072	0.0872147	0.457861
Brsk1;S587	Q5RJI5;S587	-0.70935	-1.3131	-1.74989	0.0873608	0.45829
Ppm1e;S532	Q80TL0;S532	-0.350656	4.70131	-1.74898	0.0875194	0.458785
Ahcyl2;S109	Q68FL4;S109	0.360961	4.22567	1.74846	0.0876108	0.458926
Msh4;T261	Q99MT2;T261	0.656164	-1.11417	1.74808	0.0876762	0.458931
Map2;S283	P20357;S283	0.951753	4.03421	1.74709	0.0878507	0.459507
Dlgap2;S720	Q8BJ42;S720	-0.731411	-0.981235	-1.74513	0.088194	0.459776
Map1a;S2066	Q9QYR6;S2066	1.1329	3.55552	1.74457	0.0882932	0.459776
Map1b;S885	P14873;S885	1.17097	3.24547	1.74586	0.0880656	0.459776
Mark3;S583	Q03141;S583	0.690021	0.329943	1.74518	0.0881861	0.459776
Sept4;S117	P28661;S117	-0.974715	1.25735	-1.74423	0.0883539	0.459776
Syn2;S562	Q64332;S562	0.67632	1.30423	1.74458	0.0882919	0.459776
Uhrf1bp1l;S774	A2RSJ4;S774	0.50157	1.67955	1.74489	0.0882375	0.459776
Stx7;T41	O70439;T41	0.84184	1.51977	1.74372	0.0884426	0.459901
Arhgap23;S421	Q69ZH9;S421	0.452569	-0.181075	1.74257	0.0886456	0.460285
Dstn;S3	Q9R0P5;S3	1.03369	0.474541	1.74284	0.0885985	0.460285
Lsp1;S243	P19973;S243	0.656628	-2.6171	1.74221	0.0887101	0.460285
Add3;T12	Q9QYB5;T12	-0.691888	2.72992	-1.74021	0.0890641	0.460731
Arhgap21;S469	Q6DFV3;S469	0.559504	-1.22015	1.74085	0.0889515	0.460731
Cope;S10	O89079;S10	-0.980124	0.205465	-1.74022	0.0890632	0.460731
Ppp4r4;T803	Q8C0Y0;T803	0.540323	-2.19276	1.73954	0.0891842	0.460731
Ryr2;S2362	E9Q401;S2362	0.466429	0.567645	1.74134	0.0888644	0.460731
Scn8a;S632	Q9WTU3;S632	0.586469	-1.21164	1.73984	0.0891306	0.460731
C2cd4cC2CD4 family;S259	Q5HZI2;S259	1.26493	-0.296805	1.73821	0.0894198	0.460945
Exoc7;S250	O35250;S250	0.727268	0.256099	1.73873	0.0893273	0.460945
Tnik;S740	P83510;S740	0.46323	3.37467	1.73854	0.089361	0.460945
Add2;S60	Q9QYB8;S60	0.625796	0.49743	1.73718	0.0896029	0.461555
Mast1;S801	Q9R1L5;S801	0.526239	-2.01776	1.73675	0.0896799	0.461618
Appl1;S410	Q8K3H0;S410	0.658956	-1.25848	1.7362	0.0897796	0.461798
Rtn4;S768	Q99P72;S768	0.539497	5.07372	1.73522	0.0899543	0.462362
Cep170;S662	Q6A065;S662	0.680648	0.853579	1.73449	0.0900841	0.462524
Prpf4b;S366	Q61136;S366	-0.734445	-0.535446	-1.73432	0.0901156	0.462524
Fam160b1;S187	Q8CDM8;S187	0.50148	-2.6345	1.72953	0.0909766	0.465093
Gpn1;S338	Q8VCE2;S338	0.769979	-0.393539	1.72872	0.0911238	0.465093
Iqsec1;S938	Q8R0S2;S938	0.848219	-0.640406	1.73004	0.0908855	0.465093
Nefl;S439	P08551;S439	0.723759	0.000305028	1.72911	0.0910536	0.465093
Pclo;S4402	Q9QYX7;S4402	0.52624	0.937222	1.73111	0.0906915	0.465093
Rims2;S290	Q9EQZ7;S290	0.61508	-0.420252	1.73032	0.0908351	0.465093
Shc3;S204	Q61120;S204	-0.699186	1.20923	-1.72864	0.0911384	0.465093
Tex2;S294	Q6ZPJ0;S294	0.859195	-1.6506	1.72962	0.090961	0.465093
Irf2bp2;S169	E9Q1P8;S169	0.512492	0.519865	1.72606	0.0916068	0.466481
Nrcam;S1247	Q810U4;S1247	-1.06402	0.000614662	-1.7261	0.0915994	0.466481
Sept5;S327	Q9Z2Q6;S327	1.72167	1.92604	1.72629	0.0915642	0.466481
Dpysl2;S518	O08553;S518	-1.08872	4.56593	-1.72446	0.0918971	0.467625
Eif4b;S93	Q8BGD9;S93	0.738182	-0.6192	1.72409	0.0919648	0.467636
Eps15;S816	P42567;S816	-0.720675	-0.677158	-1.72314	0.0921382	0.467938
Mpp3;S517	O88910;S517	-0.519887	-1.08506	-1.72208	0.0923318	0.467938
Sarm1;S548	Q6PDS3;S548	0.703865	-0.600518	1.72261	0.0922343	0.467938
Sept6;S416	Q9R1T4;S416	-0.539838	2.28157	-1.72196	0.0923527	0.467938
Shroom2;S935	A2ALU4;S935	0.542254	-0.794671	1.72304	0.092156	0.467938
Slc9a3r1;S275	P70441;S275	0.377491	5.25572	1.72079	0.0925679	0.468695
Scaf1;S240	Q5U4C3;S240	-0.771537	0.351366	-1.7198	0.0927491	0.469279
Mark2;S409	Q05512;S409	0.423589	-0.212821	1.71835	0.0930155	0.470293
Carkd;Y81	Q9CZ42;Y81	-0.530932	-1.58162	-1.71784	0.0931095	0.470434
Fam122a;S186	Q9DB52;S186	0.533337	-1.4776	1.71717	0.0932338	0.470728
Tbc1d10b;S693	Q8BHL3;S693	0.425481	3.11391	1.71649	0.0933588	0.471026
Adgra1;T239	Q8C4G9;T239	0.86978	0.63757	1.7154	0.0935602	0.471374
Amph;T312	Q7TQF7;T312	0.645519	-1.90981	1.7156	0.093524	0.471374
Nefh;S757	P19246;S757	0.494445	3.65875	1.71399	0.0938211	0.472021
Snapin;T14	Q9Z266;T14	0.580911	-0.97001	1.71413	0.0937947	0.472021
Kif2a;S139	P28740;S139	0.36991	3.523	1.71361	0.0938919	0.472044
Cad;S1859	B2RQC6;S1859	0.549239	1.2556	1.70951	0.0946549	0.473152
Cdc16;S560	Q8R349;S560	-0.515776	-1.94504	-1.71178	0.0942314	0.473152
Dgkb;S95	Q6NS52;S95	-1.53693	1.4478	-1.71059	0.0944536	0.473152
Dlgap4;S665	B1AZP2;S665	0.859835	-1.48936	1.70861	0.0948231	0.473152
Fam21;S388	Q6PGL7;S388	0.761431	0.151634	1.71021	0.0945238	0.473152
Gipc3;S222	Q8R5M0;S222	0.534367	0.877453	1.7085	0.0948429	0.473152
Inpp5f;S123	Q8CDA1;S123	-0.451577	-0.089914	-1.70927	0.0946995	0.473152
Lima1;S488	Q9ERG0;S488	0.779087	0.652088	1.71079	0.0944153	0.473152
Mink1;T867	Q9JM52;T867	0.852769	-0.419948	1.7112	0.0943393	0.473152
Syn2;S561	Q64332;S561	0.691366	1.26889	1.70913	0.0947258	0.473152
Tmcc2;S435	Q80W04;S435	-0.503094	1.15922	-1.71021	0.0945236	0.473152
Bsn;S1948	O88737;S1948	-0.750839	-0.180448	-1.70801	0.0949349	0.473279
Gprin3;S323	Q8BWS5;S323	-0.722183	-0.740339	-1.70725	0.0950774	0.473327
Srrm1;S260	Q52KI8;S260	0.368373	3.37666	1.70759	0.0950144	0.473327
Bcas3;S706	Q8CCN5;S706	0.514786	0.730129	1.70635	0.0952456	0.473781
Mast3;S1156	Q3U214;S1156	0.523322	1.69757	1.70606	0.0953016	0.473781
Opalin;S90	Q7M750;S90	-0.785753	2.27612	-1.70532	0.0954394	0.473995
Rims1;S1448	Q99NE5;S1448	-0.482919	2.15734	-1.70476	0.0955443	0.473995
Srcin1;S79	Q9QWI6;S79	0.49628	4.00276	1.70481	0.0955353	0.473995
Scn2a1;S692	B1AWN6;S692	-0.829113	-1.9902	-1.70414	0.0956627	0.474252
Cadm1;S448	Q8R5M8;S448	0.420568	0.398848	1.70276	0.0959223	0.474879
Dync1i1;S618	O88485;S618	-0.727476	1.65041	-1.70295	0.0958867	0.474879
Bcl11b;T416	Q99PV8;T416	-0.735629	-0.046889	-1.70203	0.0960605	0.475013
Camk2b;T287	P28652;T287	1.34752	3.78565	1.70191	0.0960827	0.475013
Tom1l2;S160	Q5SRX1;S160	0.685504	3.93393	1.70112	0.0962314	0.475418
Ank2;S890	Q8C8R3;S890	0.673136	0.315149	1.69792	0.096839	0.47633
Dclk1;S364	Q9JLM8;S364	-0.727148	0.688693	-1.69927	0.0965822	0.47633
Dnajc6;S35	Q80TZ3;S35	-0.673629	0.0858149	-1.6977	0.0968822	0.47633
Dock11;S12	A2AF47;S12	0.566962	-1.30852	1.69769	0.0968841	0.47633
Nefh;S429	P19246;S429	0.562076	-2.40296	1.69887	0.0966592	0.47633
Shank3;S375	Q4ACU6;S375	0.835912	1.94046	1.6984	0.0967482	0.47633
Slc25a46;T72	Q9CQS4;T72	-1.10575	-0.487014	-1.69866	0.0966985	0.47633
Dpysl4;S544	O35098;S544	1.3239	0.238039	1.69681	0.0970502	0.476756
Ppfia3;S737	P60469;S737	-0.609557	-0.985774	-1.69573	0.0972572	0.476756
Scn2a1;S610	B1AWN6;S610	0.923341	0.697562	1.69548	0.0973054	0.476756
Sipa1l1;S258	Q8C0T5;S258	0.666472	-0.179098	1.69565	0.0972732	0.476756
Tubb4b;S115	P68372;S115	-0.637102	-1.43953	-1.69644	0.0971211	0.476756
Bin1;S332	O08539;S332	0.818182	0.944634	1.69351	0.0976822	0.478149
Rapgef2;T1118	Q8CHG7;T1118	-0.618141	-0.351225	-1.69329	0.0977239	0.478149
Akap12;S505	Q9WTQ5;S505	0.530072	-1.4623	1.69198	0.0979757	0.478596
Akap2;S152	O54931;S152	-0.641236	-0.812583	-1.69142	0.0980839	0.478596
Gjc3;S261	Q921C1;S261	0.461139	-2.12314	1.69221	0.0979305	0.478596
Tmx1;S245	Q8VBT0;S245	0.372149	4.45354	1.69171	0.0980269	0.478596
Chd8;S1997	Q09XV5;S1997	0.427474	-1.84854	1.69102	0.0981598	0.478638
Psma3;S215	O70435;S215	0.555064	-0.667661	1.69059	0.0982436	0.478719
Syngap1;S1156	F6SEU4;S1156	0.752588	-1.34021	1.6895	0.0984522	0.479408
Atg9a;S18	Q68FE2;S18	1.64158	-0.393607	1.68871	0.098605	0.479824
Cep170b;S862	Q80U49;S862	-0.738166	0.79508	-1.6868	0.0989751	0.480348
Htatsf1;S645	Q8BGC0;S645	-0.696253	0.304934	-1.68641	0.0990498	0.480348
Myh10;S1956	Q61879;S1956	-1.00438	-0.13862	-1.68664	0.0990062	0.480348
Rbm15;S256	Q0VBL3;S256	-0.514209	-0.0871285	-1.68648	0.0990363	0.480348
Syn1;S449	O88935;S449	0.985384	4.29891	1.68672	0.0989896	0.480348
Anks1a;S679	P59672;S679	-0.569617	-1.64945	-1.68591	0.0991466	0.48049
Plekha7;S362	Q3UIL6;S362	-0.796321	-2.33137	-1.68549	0.0992297	0.480566
Madd;S1109	Q80U28;S1109	-0.772579	-0.43777	-1.68453	0.0994154	0.481138
Chgb;S147	P16014;S147	-0.598447	1.34538	-1.68358	0.0996013	0.48119
Crmp1;T509	P97427;T509	1.02727	5.48602	1.68276	0.0997601	0.48119
Map1a;S1310	Q9QYR6;S1310	-2.24141	1.16048	-1.68304	0.0997067	0.48119
Specc1;S54	Q5SXY1;S54	0.837006	2.17128	1.68274	0.0997639	0.48119
Tbc1d12;S205	Q6A039;S205	0.408371	0.010418	1.68287	0.0997379	0.48119
Anln;S656	Q8K298;S656	-1.26811	-0.36022	-1.67661	0.100965	0.481255
Cep170b;S1029	Q80U49;S1029	-0.501706	-0.702377	-1.67993	0.100314	0.481255
Esyt2;S667	Q3TZZ7;S667	0.585756	-0.190304	1.67619	0.101049	0.481255
Evl;S367	P70429;S367	0.480535	-0.0404255	1.67928	0.100442	0.481255
Git1;S397	Q68FF6;S397	-0.69507	4.1163	-1.67613	0.101061	0.481255
Gprin1;S369	Q3UNH4;S369	0.468258	3.48136	1.67963	0.100372	0.481255
Lppr4;S462	Q7TME0;S462	0.999141	-0.532327	1.67886	0.100522	0.481255
Lrfn2;S757	Q80TG9;S757	0.53927	-3.70945	1.68061	0.10018	0.481255
Map1a;T1806	Q9QYR6;T1806	-0.74548	1.83282	-1.67884	0.100528	0.481255
Mllt4;S1107	Q9QZQ1;S1107	0.684673	-0.702423	1.67834	0.100626	0.481255
Pex5l;S386	Q8C437;S386	-0.624053	-1.93634	-1.67673	0.100943	0.481255
Psd3;S1001	Q2PFD7;S1001	-0.629512	3.50172	-1.67724	0.100841	0.481255
Rtn1;S92	Q8K0T0;S92	0.521726	1.18325	1.67788	0.100717	0.481255
Shank2;S1107	Q80Z38;S1107	-0.7163	-0.75118	-1.68069	0.100165	0.481255
Srcin1;S551	Q9QWI6;S551	1.05507	0.0393654	1.67724	0.100841	0.481255
Syn1;S642	O88935;S642	0.965117	0.96069	1.68233	0.0998451	0.481255
Synm;T430	Q70IV5;T430	0.58181	-2.40813	1.67963	0.100373	0.481255
Ttbk1;S365	Q6PCN3;S365	0.767774	2.85312	1.6785	0.100594	0.481255
Uhrf1bp1l;S1020	A2RSJ4;S1020	0.513071	1.87283	1.67737	0.100817	0.481255
Lppr3;S351	Q7TPB0;S351	1.01021	-2.13971	1.67496	0.10129	0.481861
Prrc2c;T2625	Q3TLH4;T2625	0.541893	0.115206	1.6748	0.101323	0.481861
Htt;S1159	P42859;S1159	0.978216	-1.76348	1.67315	0.101649	0.482765
Thumpd1;S8	Q99J36;S8	-0.64293	1.08637	-1.67316	0.101648	0.482765
Mdm1;S539	Q9D067;S539	0.589325	-1.87398	1.67243	0.101792	0.483123
Atg2b;S1017	Q80XK6;S1017	-0.683712	-0.808871	-1.67117	0.102043	0.483991
Dzank1;S201	Q8C008;S201	0.583661	-1.05099	1.66924	0.102426	0.485164
Nbea;S1001	Q9EPN1;S1001	0.648078	-0.795713	1.66925	0.102424	0.485164
Myzap;T242	Q3UIJ9;T242	0.461827	-1.20618	1.66863	0.102548	0.485239
Pclo;T2998	Q9QYX7;T2998	-0.508241	-0.232098	-1.66823	0.102628	0.485239
Sipa1l1;S1184	Q8C0T5;S1184	0.719243	0.49134	1.66779	0.102715	0.485239
Top2b;S1400	Q64511;S1400	-0.714591	0.561008	-1.66812	0.10265	0.485239
Armc1;S246	Q9D7A8;S246	-0.99914	2.52082	-1.66567	0.103139	0.485456
Cacna1e;S954	Q61290;S954	-0.615114	-0.221978	-1.66605	0.103063	0.485456
Cadps;S259	Q80TJ1;S259	-0.51297	-2.7721	-1.66596	0.103081	0.485456
Elfn1;S674	Q8C8T7;S674	-0.811637	-2.03389	-1.66552	0.10317	0.485456
Map1b;S1686	P14873;S1686	-1.00287	1.43764	-1.6657	0.103134	0.485456
Plcl1;T557	Q3USB7;T557	-0.901718	1.01399	-1.66701	0.102871	0.485456
Hectd1;S1777	Q69ZR2;S1777	0.530869	-0.723919	1.66181	0.103916	0.487025
Hist1h1c;S37	P43277;S37	0.665104	-1.91122	1.66281	0.103715	0.487025
Jph3;S166	Q9ET77;S166	-0.857455	0.33308	-1.66279	0.103719	0.487025
Otud7a;S771	Q8R554;S771	-0.538925	-0.181837	-1.66148	0.103982	0.487025
Pclo;S3582	Q9QYX7;S3582	-1.27096	0.722179	-1.66183	0.103912	0.487025
Slc12a5;S1047	Q91V14;S1047	-0.787381	0.871717	-1.6624	0.103798	0.487025
Zfpm2;S903	Q8CCH7;S903	0.685456	-1.33514	1.6631	0.103657	0.487025
Actr3;S418	Q99JY9;S418	0.679158	1.7409	1.66055	0.10417	0.487457
Shank1;S1054	D3YZU1;S1054	0.816692	-3.04994	1.66035	0.104211	0.487457
Phactr1;S505	Q2M3X8;S505	0.631056	0.570846	1.65869	0.104547	0.488195
Srpk2;S50	O54781;S50	-0.518774	-0.47143	-1.65907	0.10447	0.488195
Tcf20;S588	Q9EPQ8;S588	-0.71708	0.239326	-1.65856	0.104574	0.488195
Cpsf7;T203	Q8BTV2;T203	0.516002	-0.299527	1.65673	0.104945	0.488645
Ncam1;S943	P13595;S943	0.763328	-0.08011	1.65675	0.10494	0.488645
Ppfia3;S17	P60469;S17	0.937415	2.78923	1.65751	0.104787	0.488645
Prdx6;T44	O08709;T44	0.433955	-2.55482	1.65691	0.104908	0.488645
Add1;S12	Q9QYC0;S12	-0.585398	6.11192	-1.65454	0.105392	0.488706
Ag2;S210	Q3UPL5;S210	-1.22447	-1.54719	-1.65612	0.105069	0.488706
Aspscr1;S193	Q8VBT9;S193	-1.35071	0.655036	-1.65533	0.10523	0.488706
Dlgap4;S763	B1AZP2;S763	-0.757052	1.23546	-1.6533	0.105644	0.488706
Fam160a2;S863	Q3U2I3;S863	1.13372	-0.480619	1.65507	0.105283	0.488706
Map2;S1791	P20357;S1791	-1.00327	4.447	-1.65489	0.105319	0.488706
Map2;S608	P20357;S608	-0.417805	0.93045	-1.65361	0.10558	0.488706
Mllt4;S1173	Q9QZQ1;S1173	0.522376	0.485301	1.65462	0.105375	0.488706
Srrm2;S1813	Q8BTI8;S1813	-0.560116	-0.869892	-1.65361	0.105581	0.488706
U2af2;S2	P26369;S2	-0.821319	-1.49662	-1.65337	0.10563	0.488706
Map7d1;S496	A2AJI0;S496	-0.77069	-0.131904	-1.65244	0.105819	0.489199
Ank2;S2475	Q8C8R3;S2475	0.796625	2.26489	1.65017	0.106286	0.489452
Atg16l1;S287	Q8C0J2;S287	0.639629	-2.30397	1.65097	0.106121	0.489452
Erc2;S792	Q6PH08;S792	0.595578	-1.4076	1.65037	0.106245	0.489452
Marcksl1;S104	P28667;S104	0.389671	4.95602	1.65149	0.106015	0.489452
Rims1;S745	Q99NE5;S745	-0.980687	-1.10713	-1.65073	0.10617	0.489452
Uchl1;S119	Q9R0P9;S119	-0.635296	-0.821629	-1.65053	0.106211	0.489452
Dpysl5;S532	Q9EQF6;S532	0.995583	3.78358	1.64838	0.106655	0.490532
Shisa7;S451	Q8C3Q5;S451	0.399709	0.397832	1.64836	0.106658	0.490532
Arhgap23;S435	Q69ZH9;S435	0.843712	-1.54287	1.64793	0.106746	0.490621
Pdha1;S232	P35486;S232	-0.515479	3.37511	-1.64734	0.106868	0.490858
Pebp1;S113	P70296;S113	0.648904	-1.28566	1.64701	0.106936	0.490858
Fam169a;S630	Q5XG69;S630	-0.59109	-2.06008	-1.64655	0.107031	0.49098
Acin1;S391	Q9JIX8;S391	-0.433162	-0.839789	-1.64428	0.107502	0.49164
Dpysl3;T508	Q62188;T508	-1.09127	-0.807111	-1.64375	0.107611	0.49164
Faim2;S38	Q8K097;S38	0.592737	-1.18586	1.64525	0.107301	0.49164
Fyn;S25	P39688;S25	-0.693172	-0.141985	-1.6444	0.107477	0.49164
Ndrg2;S338	Q9QYG0;S338	-0.83672	2.76044	-1.64318	0.10773	0.49164
Rprd2;T742	Q6NXI6;T742	0.529999	-1.45234	1.64286	0.107796	0.49164
Setd7;S3	Q8VHL1;S3	-1.14178	-0.43629	-1.64351	0.10766	0.49164
Tln2;S428	Q71LX4;S428	0.8031	0.2698	1.64375	0.107612	0.49164
Tmem51;S114	Q99LG1;S114	0.661675	1.98143	1.64287	0.107794	0.49164
Arhgap5;S1201	P97393;S1201	-0.701475	-1.20464	-1.64227	0.107919	0.491883
Dync1i2;S81	O88487;S81	-0.683706	-0.57461	-1.64084	0.108217	0.492614
Pitpnc1;S270	Q8K4R4;S270	0.730199	1.29374	1.64102	0.10818	0.492614
Bcl11b;T313	Q99PV8;T313	0.447685	-3.00148	1.64018	0.108356	0.492743
Pde1b;S465	Q01065;S465	0.64925	-0.127055	1.64004	0.108384	0.492743
Ina;S13	P46660;S13	0.500113	-1.31177	1.63779	0.108855	0.49457
Mllt4;S1719	Q9QZQ1;S1719	0.938251	-1.21351	1.63654	0.109116	0.495156
Tmem163;S56	Q8C996;S56	-0.506046	-1.7669	-1.63651	0.109123	0.495156
Pclo;S3549	Q9QYX7;S3549	0.387044	0.793247	1.63602	0.109225	0.495302
Bsn;S2647	O88737;S2647	-0.850082	0.988513	-1.63465	0.109514	0.496009
Gatad2b;S136	Q8VHR5;S136	-0.673249	-1.99766	-1.63462	0.10952	0.496009
Ag2;S196	Q3UPL5;S196	0.697944	-1.65899	1.63387	0.109678	0.49641
Ccsap;S79	Q8QZT2;S79	0.633284	-1.56823	1.63163	0.110152	0.496659
Hcn2;S842	O88703;S842	-0.918938	-0.0927664	-1.63219	0.110032	0.496659
Hnrnpu;S58	Q8VEK3;S58	-0.578813	1.90486	-1.63232	0.110006	0.496659
Map2;S726	P20357;S726	0.877862	2.42872	1.63312	0.109837	0.496659
Plcb1;S1177	Q9Z1B3;S1177	0.569802	-0.748014	1.63269	0.109927	0.496659
Thumpd1;S86	Q99J36;S86	-1.40456	2.6983	-1.63182	0.110112	0.496659
Rundc3a;S346	O08576;S346	0.683303	-0.443809	1.63122	0.110239	0.496738
Nedd4l;S504	Q8CFI0;S504	0.706401	1.00042	1.63	0.110497	0.497586
Cpeb2;S21	Q812E0;S21	0.579769	-0.486612	1.62966	0.110568	0.497593
Rimbp2;S852	Q80U40;S852	0.577381	2.62522	1.62889	0.110732	0.498013
Uhrf1bp1l;S418	A2RSJ4;S418	0.715844	0.804187	1.62806	0.110909	0.498497
Add2;S606	Q9QYB8;S606	-1.0561	3.40348	-1.62715	0.111102	0.498555
Ptk2b;S375	Q9QVP9;S375	0.499691	4.96997	1.62736	0.111059	0.498555
Tle4;S292	Q62441;S292	0.469867	-0.607814	1.62701	0.111132	0.498555
Arhgap39;S384	P59281;S384	0.472404	-3.3357	1.62629	0.111287	0.498622
Stxbp5l;S1120	Q5DQR4;S1120	-0.891508	-2.01718	-1.62658	0.111225	0.498622
Shank2;S456	Q80Z38;S456	0.794895	-0.585168	1.62571	0.111411	0.498864
Stmn4;S90	P63042;S90	-0.616432	0.0659008	-1.62517	0.111525	0.499062
Lrrc7;S1343	Q80TE7;S1343	-0.555551	0.761728	-1.62383	0.111812	0.50003
Cacna1a;S2028	P97445;S2028	0.850098	0.388123	1.62244	0.112111	0.501051
Cnksr2;S441	Q80YA9;S441	-0.635031	-1.78386	-1.62207	0.11219	0.501094
Iqsec1;S923	Q8R0S2;S923	0.52303	1.43981	1.62153	0.112306	0.50118
Mybbp1a;S1325	Q7TPV4;S1325	0.525776	-2.86043	1.62132	0.11235	0.50118
Arhgef17;S414	Q80U35;S414	0.697957	-0.855015	1.61979	0.112681	0.502065
Atp2b1;S17	G5E829;S17	0.542924	1.84471	1.61879	0.112896	0.502065
Fam13c;T125	Q9DBR2;T125	1.35539	-2.08743	1.61857	0.112943	0.502065
Hspa12b;S25	Q9CZJ2;S25	-0.551073	-0.752092	-1.61811	0.113042	0.502065
Nefh;S54	P19246;S54	0.70808	-0.305726	1.61851	0.112957	0.502065
Pak4;S476	Q8BTW9;S476	-0.473874	-0.995512	-1.61895	0.11286	0.502065
Thumpd1;S88	Q99J36;S88	-1.40456	2.68064	-1.61815	0.113035	0.502065
Bcr;S475	Q6PAJ1;S475	0.503325	-0.236773	1.614	0.113934	0.503126
Camkv;T430	Q3UHL1;T430	-0.889358	1.24508	-1.61544	0.113621	0.503126
Dvl3;S125	Q61062;S125	0.638376	1.4322	1.61343	0.114058	0.503126
Fam134c;S258	Q9CQV4;S258	-0.573641	-1.65602	-1.6158	0.113543	0.503126
Hepacam;S352	Q640R3;S352	0.3877	2.34535	1.61473	0.113775	0.503126
Nedd4l;T347	Q8CFI0;T347	-0.613627	-1.17035	-1.61595	0.113511	0.503126
Oxr1;S204	Q4KMM3;S204	-2.20042	2.49647	-1.61532	0.113647	0.503126
Phldb1;S951	Q6PDH0;S951	0.613838	-1.46383	1.61401	0.113932	0.503126
Sipa1l1;S1170	Q8C0T5;S1170	-0.48778	-2.24913	-1.61347	0.114048	0.503126
Slc4a10;S276	Q5DTL9;S276	0.514603	1.94742	1.61563	0.11358	0.503126
Srrm2;S323	Q8BTI8;S323	1.03488	2.52553	1.61424	0.113882	0.503126
Arhgap39;S282	P59281;S282	0.426863	-0.770963	1.61279	0.114196	0.503349
Fxyd1;S82	Q9Z239;S82	2.45926	1.53432	1.61236	0.11429	0.503349
Tsc22d4;S189	Q9EQN3;S189	0.58824	-0.889596	1.61223	0.11432	0.503349
Pak4;S181	Q8BTW9;S181	0.657	0.232183	1.61168	0.11444	0.503566
Nefh;S763	P19246;S763	0.483071	4.11378	1.60911	0.115001	0.505467
Slc1a2;S532	P43006;S532	-0.800138	0.335339	-1.60905	0.115014	0.505467
Ccdc132;S498	Q8CI71;S498	0.421808	-1.06627	1.60857	0.115119	0.505616
Golga4;S93	Q91VW5;S93	-0.989861	-3.8564	-1.6077	0.11531	0.505942
Ncam2;S786	O35136;S786	-0.457606	1.30594	-1.60734	0.115389	0.505942
Szrd1;S107	Q6NXN1;S107	0.38505	2.63628	1.60726	0.115406	0.505942
Map1b;S1391	P14873;S1391	-2.22917	4.46896	-1.60639	0.115598	0.50647
Kiaa1045;T310	Q80TL4;T310	-0.712379	-2.92437	-1.60598	0.115689	0.506558
Atp2b2;T1143	Q9R0K7;T1143	-0.76723	0.3129	-1.59993	0.117029	0.506714
Brsk1;S519	Q5RJI5;S519	-1.222	1.36759	-1.60484	0.11594	0.506714
Cacna1b;S915	O55017;S915	-1.04645	1.2017	-1.60236	0.116488	0.506714
Csnk2b;S209	P67871;S209	1.39555	2.88526	1.60062	0.116875	0.506714
Fam171b;S792	Q14CH0;S792	0.599017	0.370748	1.59988	0.11704	0.506714
Huwe1;S1907	Q7TMY8;S1907	-0.562385	1.16254	-1.60388	0.116152	0.506714
Inpp5j;S325	P59644;S325	0.509623	-1.32318	1.60447	0.116022	0.506714
Map2;S309	P20357;S309	1.21243	-1.17456	1.60166	0.116644	0.506714
Map4;S876	P27546;S876	0.755238	2.01168	1.60155	0.116669	0.506714
Psd3;S1000	Q2PFD7;S1000	-0.269765	5.2557	-1.6023	0.116501	0.506714
Rabl6;T383	Q5U3K5;T383	0.77294	-2.50477	1.60034	0.116937	0.506714
Rltpr;S1134	Q3V3V9;S1134	-0.729883	0.732354	-1.60215	0.116535	0.506714
Slc6a7;S22	Q6PGE7;S22	-0.795526	-1.33437	-1.6045	0.116015	0.506714
Srcin1;S233	Q9QWI6;S233	0.562324	4.07635	1.60547	0.115802	0.506714
Ssfa2;S738	Q922B9;S738	0.607698	-1.72105	1.60182	0.116608	0.506714
Tanc2;S1583	A2A690;S1583	0.394288	2.98475	1.60369	0.116194	0.506714
Tmpo;T74	Q61029;T74	0.52675	1.48085	1.60006	0.116999	0.506714
Vipas39;S119	Q8BGQ1;S119	0.618243	0.99227	1.60346	0.116246	0.506714
Ywhaz;S207	P63101;S207	-0.652249	0.185832	-1.59971	0.117076	0.506714
Ank2;S3850	Q8C8R3;S3850	-0.975933	1.32498	-1.59852	0.117342	0.507556
Atp8a1;T28	P70704;T28	-0.697821	0.249371	-1.59804	0.117449	0.507709
Map1b;S1373	P14873;S1373	-0.888385	3.14255	-1.59735	0.117602	0.508063
Arhgap21;S471	Q6DFV3;S471	0.376791	0.64345	1.59631	0.117835	0.508454
Trappc9;S953	Q3U0M1;S953	1.32785	-0.935782	1.59655	0.117782	0.508454
Clasp2;S1004	Q8BRT1;S1004	0.797291	0.0510679	1.59579	0.117951	0.508597
Fam21;S783	Q6PGL7;S783	-0.612653	-0.632361	-1.59355	0.118454	0.508597
Gab1;S420	Q9QYY0;S420	0.55187	-1.2578	1.59489	0.118152	0.508597
Hist1h1b;S2	P43276;S2	-0.634023	0.0717342	-1.59471	0.118192	0.508597
Jph3;S163	Q9ET77;S163	-0.770268	-1.10998	-1.59433	0.118277	0.508597
Kiaa1549;S1338	Q68FD9;S1338	-0.609079	-0.637846	-1.59512	0.118101	0.508597
Mbp;S206	P04370;S206	-1.38934	2.54449	-1.59272	0.118639	0.508597
Myh9;S1943	Q8VDD5;S1943	-0.616838	3.08334	-1.59266	0.118653	0.508597
Ncor1;S2194	Q60974;S2194	0.587397	-4.39605	1.59303	0.118569	0.508597
Nhsl1;S1373	Q8CAF4;S1373	-0.52729	-1.48663	-1.59357	0.11845	0.508597
Osbpl6;S368	Q8BXR9;S368	0.65624	-1.12938	1.59284	0.118612	0.508597
Aspscr1;S279	Q8VBT9;S279	0.47051	-0.267229	1.59156	0.1189	0.508665
Map1s;S573	Q8C052;S573	-0.733208	0.495016	-1.59112	0.119	0.508665
Mark2;S566	Q05512;S566	0.602412	1.25207	1.59056	0.119125	0.508665
Ncam1;S926	P13595;S926	0.683534	2.32999	1.59059	0.119119	0.508665
Npm1;S125	Q61937;S125	-0.813169	2.92366	-1.59158	0.118895	0.508665
Pacsin1;S4	Q61644;S4	-0.516431	-2.32528	-1.59045	0.119151	0.508665
Pam;S935	P97467;S935	-1.20511	-2.57983	-1.59037	0.119169	0.508665
Cacybp;S50	Q9CXW3;S50	0.547962	-2.30857	1.58891	0.119497	0.509455
Sept4;Y115	P28661;Y115	-0.938344	0.327281	-1.58896	0.119487	0.509455
Sltm;S999	Q8CH25;S999	0.764421	0.550677	1.588	0.119704	0.510032
Scn2a1;S589	B1AWN6;S589	0.667337	0.398918	1.58734	0.119854	0.510364
Ank3;S1883	G5E8K5;S1883	-0.774108	0.352911	-1.58523	0.120333	0.510915
Dlgap4;S421	B1AZP2;S421	0.527157	-1.09956	1.58519	0.120342	0.510915
Dos;T150	Q66L44;T150	0.537652	-1.05468	1.58536	0.120304	0.510915
Lphn1;S1465	Q80TR1;S1465	0.651011	-1.66336	1.58603	0.120152	0.510915
Nhsl1;S1375	Q8CAF4;S1375	-0.515944	-1.4748	-1.58608	0.120139	0.510915
Agtpbp1;S471	Q641K1;S471	0.529303	-1.25818	1.58374	0.120673	0.512014
Cacna1a;S462	P97445;S462	-0.388075	-2.32664	-1.58307	0.120825	0.512356
Acot11;S27	Q8VHQ9;S27	-0.564768	-1.16306	-1.58189	0.121095	0.512983
Rims1;S740	Q99NE5;S740	-1.02293	-1.53825	-1.58179	0.121117	0.512983
Cdc42bpb;S1685	Q7TT50;S1685	-0.696175	0.652811	-1.57992	0.121544	0.51353
Dmxl2;S434	Q8BPN8;S434	-0.63383	2.53265	-1.57979	0.121574	0.51353
Ralgapa1;S1477	Q6GYP7;S1477	-0.440928	-1.09149	-1.57996	0.121536	0.51353
Rims1;T412	Q99NE5;T412	-0.465208	2.08777	-1.57984	0.121563	0.51353
Syn1;T448	O88935;T448	0.885546	3.15747	1.57965	0.121607	0.51353
Ap1g1;S232	P22892;S232	0.804479	-1.28176	1.57792	0.122003	0.514309
Epn1;S453	Q80VP1;S453	-0.691948	1.81411	-1.57791	0.122008	0.514309
Myo9b;S1218	Q9QY06;S1218	0.889743	-1.94291	1.57839	0.121896	0.514309
Hba;S132	P01942;S132	-1.11828	-2.10925	-1.57666	0.122295	0.515215
Radil;S235	Q69Z89;S235	0.471934	-0.70594	1.57576	0.122503	0.515526
Syngap1;S371	F6SEU4;S371	-1.01619	1.72935	-1.57571	0.122513	0.515526
Map2;S603	P20357;S603	-0.557808	0.0804705	-1.57524	0.122621	0.515676
Tuba1b;T94	P05213;T94	-0.63327	-1.37382	-1.57488	0.122705	0.515724
Plekhg5;S234	Q66T02;S234	0.447827	-1.63345	1.57437	0.122822	0.51584
Sipa1l3;S384	G3X9J0;S384	0.597191	-2.05579	1.57413	0.122878	0.51584
Sept4;S118	P28661;S118	-0.884145	0.993385	-1.57364	0.122992	0.516018
Map1a;S1289	Q9QYR6;S1289	-0.384111	2.44605	-1.57251	0.123254	0.516506
Plekhg5;S259	Q66T02;S259	0.462982	-1.71501	1.57261	0.123231	0.516506
Sema4b;S816	Q62179;S816	0.393031	-1.91041	1.57206	0.123357	0.516636
Ctnnd2;T1064	O35927;T1064	-0.399224	-1.34751	-1.57159	0.123466	0.516788
Bcl11a;S205	Q9QYE3;S205	0.433209	-0.195305	1.57108	0.123585	0.516982
Gpr37l1;T479	Q99JG2;T479	1.15609	-3.04612	1.56959	0.123932	0.518037
Jph3;S169	Q9ET77;S169	-0.734561	0.0503566	-1.56937	0.123983	0.518037
Cldn12;S231	Q9ET43;S231	1.03632	-0.0551565	1.56883	0.12411	0.518263
Grin2b;S1058	Q01097;S1058	-0.674364	0.412817	-1.56788	0.124329	0.518332
Mbd3;S56	Q9Z2D8;S56	-0.65714	-1.89404	-1.5672	0.12449	0.518332
Nsun2;S723	Q1HFZ0;S723	0.499329	1.34049	1.56751	0.124416	0.518332
Smad2;T8	Q62432;T8	0.786955	-0.74335	1.56744	0.124433	0.518332
Tbc1d10b;S650	Q8BHL3;S650	0.638432	-2.38447	1.5679	0.124326	0.518332
Kiaa1211;S783	Q5PR69;S783	0.438877	0.544774	1.56516	0.124967	0.51973
Lsm14a;T194	Q8K2F8;T194	0.922111	-0.347506	1.56514	0.124972	0.51973
Ralgps1;S298	A2AR50;S298	0.497169	-0.179244	1.56456	0.125108	0.519995
Camk2a;S331	P11798;S331	-1.74175	4.07249	-1.56354	0.125347	0.520076
Dnajc6;S490	Q80TZ3;S490	-0.964171	3.21753	-1.56361	0.125331	0.520076
Sipa1l2;S149	Q80TE4;S149	-0.621887	-3.3513	-1.56364	0.125324	0.520076
Bsn;S1173	O88737;S1173	1.25478	2.83277	1.56261	0.125565	0.520377
Magi2;S725	Q9WVQ1;S725	-0.43822	-1.23573	-1.56282	0.125517	0.520377
Fam169a;S631	Q5XG69;S631	-0.568036	-2.05751	-1.56134	0.125865	0.521018
Pclo;S4066	Q9QYX7;S4066	0.738583	0.388498	1.56133	0.125866	0.521018
Bai2;S1269	Q8CGM1;S1269	-0.426804	-1.80282	-1.55952	0.126294	0.522272
Ctnna2;T657	Q61301;T657	-0.333084	1.08323	-1.55943	0.126316	0.522272
Mark2;S453	Q05512;S453	1.42055	-1.24222	1.55838	0.126564	0.52269
Otud4;S1017	B2RRE7;S1017	-0.66058	0.27932	-1.55865	0.126501	0.52269
Tsc2;S660	Q61037;S660	0.677224	0.110406	1.55778	0.126706	0.522976
Sipa1l2;S1461	Q80TE4;S1461	-0.498861	-2.72527	-1.55746	0.126784	0.522992
Limk1;S271	P53668;S271	0.798719	0.618914	1.55587	0.127161	0.52364
Ptprr;S271	Q62132;S271	0.457905	-1.84352	1.5559	0.127153	0.52364
Slc12a5;T1029	Q91V14;T1029	0.493728	-1.32598	1.55595	0.127141	0.52364
Arhgap31;S1093	A6X8Z5;S1093	0.648772	-2.60172	1.55538	0.127277	0.523815
Dbn1;S142	Q9QXS6;S142	-1.27298	5.86668	-1.55491	0.12739	0.523975
Dgkg;T87	Q91WG7;T87	-0.719464	1.20919	-1.55416	0.127567	0.524401
Akap5;S262	D3YVF0;S262	0.622396	0.52913	1.55055	0.12843	0.525892
Anapc1;S688	P53995;S688	0.64677	-0.578571	1.55052	0.128437	0.525892
Arhgap35;S1179	Q91YM2;S1179	-0.815232	0.596399	-1.55056	0.128428	0.525892
Atp6v1b2;S399	P62814;S399	-0.767658	-3.11769	-1.5502	0.128514	0.525892
Ppm1h;S222	Q3UYC0;S222	0.694865	0.878851	1.55015	0.128525	0.525892
Rap1gap;S498	A2ALS5;S498	0.740119	0.463922	1.55179	0.128132	0.525892
Rasgrf2;S745	P70392;S745	0.318453	2.22643	1.54987	0.128594	0.525892
Slc4a1;S18	P04919;S18	-0.493646	-0.468766	-1.55193	0.128101	0.525892
Sqstm1;S368	Q64337;S368	0.573891	-0.628943	1.55145	0.128214	0.525892
Gabbr2;S915	Q80T41;S915	-0.99426	0.275723	-1.5492	0.128755	0.526247
Adcy9;S1332	P51830;S1332	-0.422383	-0.160644	-1.54838	0.12895	0.5264
Cacnb4;S406	Q8R0S4;S406	-1.10172	-0.174441	-1.5483	0.128969	0.5264
Chgb;S626	P16014;S626	-0.930546	2.17421	-1.5479	0.129068	0.5264
Smpd3;S289	Q9JJY3;S289	-0.660803	1.18028	-1.54781	0.129088	0.5264
C2cd4cC2CD4 family;S175	Q5HZI2;S175	0.6786	0.817046	1.54739	0.129189	0.526511
Atxn2l;S499	Q7TQH0;S499	0.588849	-1.06166	1.54671	0.129354	0.526581
Pclo;S1575	Q9QYX7;S1575	-0.518398	1.87115	-1.54671	0.129353	0.526581
Dgkg;S779	Q91WG7;S779	0.522142	-0.0534046	1.54608	0.129504	0.526892
Ppp1r2;S88	Q9DCL8;S88	-1.22504	2.15522	-1.54531	0.129691	0.527351
Numa1;S1739	E9Q7G0;S1739	0.350355	0.945183	1.54443	0.129905	0.527618
Vprbp;S999	Q80TR8;S999	0.675292	-3.35791	1.54455	0.129875	0.527618
Dnajc6;S595	Q80TZ3;S595	-1.1109	2.70725	-1.54246	0.130381	0.528649
Srrm2;T831	Q8BTI8;T831	-0.598346	-1.71747	-1.54247	0.130379	0.528649
Wdr47;S312	Q8CGF6;S312	0.588158	-1.3033	1.54247	0.130378	0.528649
Iqsec1;S362	Q8R0S2;S362	-0.817271	0.410809	-1.54181	0.130538	0.528983
Cacna1b;S48	O55017;S48	0.448647	1.2957	1.54146	0.130624	0.529032
Gpr22;S387	Q8BZL4;S387	-0.468923	-1.0799	-1.5402	0.130929	0.529966
Dmtn;S226	Q9WV69;S226	-0.505685	2.32022	-1.53946	0.13111	0.530128
Kcna4;S100	Q61423;S100	-0.562891	-0.791162	-1.53882	0.131267	0.530128
Nucb1;S85	Q02819;S85	0.673633	0.693674	1.53905	0.13121	0.530128
Slc4a4;S68	O88343;S68	0.960392	2.69067	1.53903	0.131215	0.530128
Gprin1;S917	Q3UNH4;S917	0.548501	-1.98888	1.53833	0.131385	0.530303
Arhgef7;S228	Q9ES28;S228	-1.0377	2.87534	-1.53636	0.131868	0.53047
Bin1;S298	O08539;S298	-0.247274	5.27363	-1.53533	0.13212	0.53047
Epb41l3;S428	Q9WV92;S428	0.369471	1.34457	1.53512	0.132171	0.53047
Igbp1b;S234	Q9QZ29;S234	0.50353	-1.66461	1.53595	0.131969	0.53047
Pkp4;S511	Q68FH0;S511	-0.72777	2.54129	-1.5371	0.131687	0.53047
Prkce;S729	P16054;S729	1.48178	-0.16234	1.53533	0.132121	0.53047
Prpf4b;S368	Q61136;S368	-0.677594	-0.546574	-1.53744	0.131602	0.53047
Rasip1;S322	Q3U0S6;S322	0.415746	-3.0787	1.5366	0.131809	0.53047
Tpi1;S273	P17751;S273	0.456037	-2.59245	1.53645	0.131846	0.53047
Ulk2;S772	Q9QY01;S772	0.473352	-1.59739	1.53565	0.13204	0.53047
Zbtb18;S333	Q9WUK6;S333	0.559141	0.513978	1.53445	0.132336	0.530836
Mlf2;S38	Q99KX1;S38	-0.593692	-2.13946	-1.53413	0.132415	0.530852
Abl2;S936	Q4JIM5;S936	0.425772	-1.07671	1.53292	0.132711	0.531253
Camsap1;S481	A2AHC3;S481	0.486394	2.00026	1.53281	0.132739	0.531253
Strn;S259	O55106;S259	0.41592	-1.81123	1.53289	0.132719	0.531253
Tnik;T552	P83510;T552	-0.672038	-2.81669	-1.53191	0.13296	0.53184
Ank2;S1839	Q8C8R3;S1839	-0.643597	-0.25564	-1.53092	0.133204	0.531969
Ap3b2;S282	Q9JME5;S282	0.712399	-0.295637	1.53057	0.133291	0.531969
Ccdc132;S559	Q8CI71;S559	-0.525677	1.33654	-1.53087	0.133216	0.531969
Mast3;S1229	Q3U214;S1229	0.545448	-1.73351	1.53144	0.133076	0.531969
Oxsr1;S339	Q6P9R2;S339	-0.527468	1.94924	-1.53011	0.133405	0.532128
Camsap2;S1120	Q8C1B1;S1120	0.483294	2.18364	1.52943	0.133572	0.532357
Shank3;S694	Q4ACU6;S694	-0.466478	-1.36806	-1.52927	0.133612	0.532357
Mink1;S715	Q9JM52;S715	0.758679	-0.375712	1.52855	0.133791	0.53277
Pcbp1;S173	P60335;S173	-0.762364	-0.0671926	-1.52793	0.133945	0.533087
Inpp5j;S893	P59644;S893	1.43369	-1.87718	1.52749	0.134052	0.533216
Phactr4;S118	Q501J7;S118	0.508753	-0.297498	1.527	0.134174	0.533402
Dock9;S178	Q8BIK4;S178	0.547542	0.960469	1.52641	0.134321	0.53369
Numa1;S398	E9Q7G0;S398	0.589551	-0.76735	1.52601	0.134421	0.533787
Begain;T567	Q68EF6;T567	0.626209	-0.465563	1.5255	0.134548	0.533871
Mpp1;S57	P70290;S57	-0.628501	0.122608	-1.52502	0.134667	0.533871
Rpgr;S518	Q9R0X5;S518	-0.677472	-3.85554	-1.52523	0.134616	0.533871
Akap5;S270	D3YVF0;S270	0.695367	0.822732	1.52091	0.135693	0.534024
Arhgap12;S584	Q8C0D4;S584	0.452357	1.18296	1.52365	0.135008	0.534024
Bag3;S390	Q9JLV1;S390	0.604833	0.769555	1.52151	0.135543	0.534024
Bsn;S3382	O88737;S3382	-1.7445	2.44016	-1.52265	0.135257	0.534024
C2cd2l;S662	Q80X80;S662	-0.510813	0.254991	-1.52081	0.135717	0.534024
Cacng2;S221	O88602;S221	0.494895	-2.38547	1.52189	0.135448	0.534024
Dock4;S1933	P59764;S1933	0.606963	-0.764448	1.52351	0.135044	0.534024
Fam131b;S102	Q3TY60;S102	-0.571195	-1.05873	-1.52102	0.135666	0.534024
Igbp1b;S235	Q9QZ29;S235	0.50353	-1.66913	1.52263	0.135263	0.534024
Kcnd2;T567	Q9Z0V2;T567	0.525257	0.724706	1.52159	0.135522	0.534024
Map1b;S1293	P14873;S1293	0.672859	2.24481	1.52304	0.135162	0.534024
Nedd4l;S350	Q8CFI0;S350	-0.796563	-3.8267	-1.52067	0.135755	0.534024
Rap1gap2;S26	Q5SVL6;S26	0.699927	1.40057	1.52228	0.13535	0.534024
Uba1;T800	Q02053;T800	0.523209	-3.72197	1.52067	0.135753	0.534024
Inpp5f;S911	Q8CDA1;S911	0.565489	-0.653045	1.51975	0.135983	0.534037
Rptor;S722	Q8K4Q0;S722	0.509473	-0.275751	1.51977	0.135978	0.534037
Spata2l;S329	Q8BNN1;S329	0.626721	-0.163142	1.52011	0.135893	0.534037
Ift140;S1445	E9PY46;S1445	-0.496701	-0.839442	-1.51894	0.136187	0.534542
Caskin1;S420	Q6P9K8;S420	0.654927	-2.51994	1.51645	0.136815	0.534605
Map1a;S1190	Q9QYR6;S1190	-0.911264	1.33529	-1.51692	0.136697	0.534605
Map1b;S1395	P14873;S1395	-2.12042	4.16584	-1.51787	0.136457	0.534605
Map7d1;S444	A2AJI0;S444	0.461243	0.121018	1.5183	0.136348	0.534605
Palmd;S321	Q9JHU2;S321	-0.737813	-0.243224	-1.51656	0.136786	0.534605
Plekhg5;S260	Q66T02;S260	-0.461473	-1.74699	-1.51708	0.136656	0.534605
Prkaa1;S356	Q5EG47;S356	0.538509	0.574101	1.51749	0.136552	0.534605
Prrt3;T867	Q6PE13;T867	-0.895481	-0.111488	-1.51695	0.136689	0.534605
Thrap3;S695	Q569Z6;S695	0.482321	0.706218	1.5162	0.136878	0.534605
Mast4;S2053	Q811L6;S2053	-0.362608	-2.69396	-1.51408	0.137412	0.536396
Camk2a;S333	P11798;S333	-1.06868	3.16502	-1.51358	0.13754	0.53651
Rtn4;S690	Q99P72;S690	-1.23378	1.66348	-1.51337	0.137592	0.53651
Cic;T2283	Q924A2;T2283	0.884087	0.613123	1.51275	0.137749	0.536538
Hbb-b1;S53	P02088;S53	-0.593617	-1.28313	-1.5129	0.137712	0.536538
Rab10;T73	P61027;T73	0.504501	-0.28067	1.51157	0.138049	0.53741
Palm;T145	Q9Z0P4;T145	-0.412268	4.02336	-1.51087	0.138226	0.537513
Srrm2;S2075	Q8BTI8;S2075	-0.86841	-2.40551	-1.51105	0.13818	0.537513
Pdlim5;S332	Q8CI51;S332	0.574669	1.64829	1.51005	0.138436	0.537951
Sgsm1;S230	Q8BPQ7;S230	-0.727782	-0.0086815	-1.50973	0.138516	0.537951
Sh3pxd2a;S812	O89032;S812	0.611921	-0.802741	1.50954	0.138565	0.537951
Htt;S1853	P42859;S1853	-0.606265	0.260015	-1.50854	0.138819	0.538642
Gpm6b;S320	P35803;S320	-0.571054	4.9922	-1.50819	0.13891	0.538702
Grin2b;S1019	Q01097;S1019	0.604675	-1.02435	1.50751	0.139082	0.539028
Pacs1;S428	Q8K212;S428	0.581639	-1.33258	1.50727	0.139145	0.539028
Neo1;S1254	P97798;S1254	0.583589	-1.17706	1.5055	0.139599	0.540489
Dock10;T1440	Q8BZN6;T1440	1.52556	-2.70916	1.50457	0.139836	0.541114
Phactr1;S67	Q2M3X8;S67	0.461819	2.21616	1.50352	0.140106	0.541866
Neto1;S483	Q8R4I7;S483	-0.64617	1.98122	-1.50288	0.140269	0.541906
Sgip1;S27	Q8VD37;S27	-0.780567	0.723476	-1.50307	0.140222	0.541906
Pak2;S141	Q8CIN4;S141	0.447478	0.835934	1.50007	0.140995	0.544053
Ptges3;S113	Q9R0Q7;S113	-1.29162	1.15931	-1.5	0.141013	0.544053
Sptan1;S1479	P16546;S1479	0.533435	-3.63202	1.49984	0.141054	0.544053
Dlgap3;S753	Q6PFD5;S753	0.539803	1.89969	1.49905	0.141259	0.544255
Mast1;S1427	Q9R1L5;S1427	-0.579428	0.272256	-1.49912	0.14124	0.544255
Sept5;T336	Q9Z2Q6;T336	0.936813	-0.433353	1.49814	0.141494	0.544865
Anln;S653	Q8K298;S653	-1.0515	-0.0805765	-1.49781	0.141578	0.544897
Cacna1e;S944	Q61290;S944	0.522226	1.44333	1.49678	0.141846	0.545633
Hsp90aa1;S231	P07901;S231	-0.818489	0.738661	-1.49611	0.142021	0.545745
Lrrfip2;S111	Q91WK0;S111	0.537601	0.263899	1.49608	0.142029	0.545745
Brsk1;S410	Q5RJI5;S410	0.589823	-2.27034	1.49569	0.142128	0.545782
Sh2b1;S126	Q91ZM2;S126	0.471382	0.801948	1.49457	0.142421	0.545782
Sh2b1;S127	Q91ZM2;S127	0.471382	0.801948	1.49457	0.142421	0.545782
Syngap1;S752	F6SEU4;S752	0.59705	0.834296	1.4949	0.142336	0.545782
Tjp1;S131	P39447;S131	-0.861755	1.8927	-1.49486	0.142346	0.545782
Brsk2;S482	Q69Z98;S482	0.748523	-2.44448	1.49384	0.142611	0.545981
Slc4a3;S67	P16283;S67	0.481	-0.271085	1.49378	0.142626	0.545981
Isyna1;T523	Q9JHU9;T523	-0.539915	-1.38957	-1.49235	0.142998	0.546231
Mark2;S408	Q05512;S408	0.375228	-0.241449	1.49273	0.142899	0.546231
Prickle2;T535	Q80Y24;T535	-0.611556	-1.23105	-1.49261	0.142932	0.546231
Syngap1;S1162	F6SEU4;S1162	-0.624327	0.104347	-1.49269	0.142911	0.546231
Add1;S59	Q9QYC0;S59	-0.643806	-1.67281	-1.49015	0.143574	0.546316
Atxn2l;S562	Q7TQH0;S562	0.493249	-0.862562	1.49086	0.143389	0.546316
Ccdc177;S310	Q3UHB8;S310	0.615903	2.94669	1.49075	0.143418	0.546316
Dtx3l;S9	Q3UIR3;S9	0.569765	-2.86654	1.48998	0.143619	0.546316
Hepacam;S345	Q640R3;S345	0.715622	-2.68067	1.48963	0.143711	0.546316
Mapk8ip3;S366	Q9ESN9;S366	0.494721	2.94854	1.48973	0.143685	0.546316
Rims1;S1450	Q99NE5;S1450	-0.630393	0.993981	-1.49078	0.14341	0.546316
Sptan1;S1186	P16546;S1186	-0.36171	0.487188	-1.49136	0.143258	0.546316
Syt7;S52	Q9R0N7;S52	-0.615182	0.0765612	-1.49096	0.143363	0.546316
Map1s;S670	Q8C052;S670	0.539758	-1.16349	1.48857	0.143988	0.546787
Tubb4b;T232	P68372;T232	-0.677752	-0.548942	-1.48883	0.143921	0.546787
Prkcg;S328	P63318;S328	0.992337	0.644696	1.4872	0.14435	0.547868
Cx3cl1;S262	O35188;S262	-0.463918	0.368743	-1.48651	0.144531	0.547971
Rgs12;S879	Q8CGE9;S879	-0.425426	-1.80483	-1.48659	0.14451	0.547971
Srrm2;S2646	Q8BTI8;S2646	-0.446121	-1.8221	-1.48591	0.144689	0.54828
Apba1;T375	B2RUJ5;T375	-0.793117	0.46597	-1.48522	0.14487	0.548673
Canx;S582	P35564;S582	0.315078	5.42688	1.48464	0.145025	0.548968
Rapgef2;S558	Q8CHG7;S558	0.761394	1.38257	1.48403	0.145186	0.549287
Egfr;S1166	Q01279;S1166	-0.50754	-2.22658	-1.48314	0.14542	0.549878
Ank2;S31	Q8C8R3;S31	-0.273284	1.14081	-1.48138	0.145888	0.550189
Arhgap32;S935	Q811P8;S935	0.477754	-0.930181	1.48148	0.145859	0.550189
Ctnna1;T658	P26231;T658	-0.333084	1.07397	-1.48143	0.145874	0.550189
Eno1;T229	P17182;T229	0.442376	-2.57219	1.48218	0.145674	0.550189
Pclo;S4325	Q9QYX7;S4325	-0.515624	2.81137	-1.48176	0.145787	0.550189
Ptprn;S307	Q60673;S307	0.428227	1.40225	1.48091	0.146011	0.55036
Hnrnpa3;S359	Q8BG05;S359	0.363408	3.55578	1.4802	0.146201	0.550784
Tacc1;S401	Q6Y685;S401	0.671494	-0.613349	1.47934	0.146428	0.551349
Brsk1;S508	Q5RJI5;S508	0.65343	2.05076	1.47773	0.146859	0.55158
Mical3;S1716	Q8CJ19;S1716	0.376519	-0.744675	1.47767	0.146874	0.55158
Nefm;S416	P08553;S416	0.722545	-3.01925	1.47766	0.146876	0.55158
Nipbl;S2652	Q6KCD5;S2652	0.508758	-1.51333	1.47769	0.146868	0.55158
Pitpnm1;S600	O35954;S600	0.636943	-1.49825	1.47794	0.146802	0.55158
Arhgap26;S609	Q6ZQ82;S609	-0.549957	-0.721716	-1.47541	0.147479	0.551867
Dffa;S314	O54786;S314	0.574617	-1.74855	1.47486	0.147625	0.551867
Gm996;S509	A2AJA9;S509	-0.399287	-2.69237	-1.47608	0.1473	0.551867
Nav1;S93	Q8CH77;S93	0.518424	-2.60339	1.47507	0.147569	0.551867
Osbpl11;S15	Q8CI95;S15	0.75013	-2.46593	1.47495	0.147601	0.551867
Radil;S432	Q69Z89;S432	0.514521	-3.0657	1.47628	0.147246	0.551867
Rapgef2;S1175	Q8CHG7;S1175	0.641546	-0.915661	1.47477	0.14765	0.551867
Snap91;T309	Q61548;T309	-0.900868	2.50336	-1.47705	0.147039	0.551867
Syn2;S108	Q64332;S108	-0.47005	-0.640504	-1.47487	0.147623	0.551867
Pitpnm2;S316	Q6ZPQ6;S316	0.453234	1.09523	1.47389	0.147886	0.552458
Aatk;S528	Q80YE4;S528	0.425787	-1.99592	1.47229	0.148314	0.55265
Cad;S1407	B2RQC6;S1407	0.482285	-2.13706	1.47238	0.14829	0.55265
Jph1;S216	Q9ET80;S216	-0.698821	-1.03319	-1.47129	0.148583	0.55265
Scg2;S556	Q03517;S556	-0.849072	0.66111	-1.4726	0.148233	0.55265
Srrm2;S1972	Q8BTI8;S1972	-0.929369	0.603906	-1.47142	0.148548	0.55265
Srrm2;T1974	Q8BTI8;T1974	-0.919246	0.617282	-1.47128	0.148587	0.55265
Syt7;T55	Q9R0N7;T55	-0.503747	0.77437	-1.4711	0.148635	0.55265
Tenm4;S29	Q3UHK6;S29	-0.601817	-2.07835	-1.4718	0.148446	0.55265
Ttc7b;Y617	E9Q6P5;Y617	-0.649488	-1.91828	-1.47114	0.148624	0.55265
Grin2b;T1065	Q01097;T1065	-0.604899	0.199741	-1.47075	0.148729	0.552711
Ak5;T110	Q920P5;T110	-0.790554	-1.10143	-1.46938	0.149098	0.553072
Clasp2;S333	Q8BRT1;S333	-0.567901	1.29604	-1.46925	0.149135	0.553072
Dlg2;S28	Q91XM9;S28	0.302581	4.00833	1.46924	0.149137	0.553072
Ttc7b;S678	E9Q6P5;S678	-0.962032	-1.5165	-1.46988	0.148965	0.553072
Arhgap44;S636	Q5SSM3;S636	0.430506	2.2387	1.46842	0.149357	0.553601
Hba;S134	P01942;S134	-0.593411	-2.45167	-1.46804	0.149461	0.553699
Camsap2;S943	Q8C1B1;S943	-0.528594	-0.335247	-1.4653	0.150204	0.553887
Carhsp1;S31	Q9CR86;S31	0.796255	1.23817	1.46369	0.150642	0.553887
Dlg4;S73	Q62108;S73	-0.585102	-1.11956	-1.4664	0.149906	0.553887
Eps15;S324	P42567;S324	0.468997	-1.00187	1.46643	0.149898	0.553887
Fam169a;S348	Q5XG69;S348	-0.55493	-0.19614	-1.4656	0.150123	0.553887
Lypla2;S82	Q9WTL7;S82	0.564692	-1.9389	1.46355	0.150678	0.553887
Map6;S491	Q7TSJ2;S491	0.514529	-0.571496	1.46572	0.150088	0.553887
Marf1;S1081	Q8BJ34;S1081	0.515021	-1.62849	1.4636	0.150667	0.553887
Nyap2;S538	Q8BM65;S538	0.731798	-1.7348	1.46403	0.15055	0.553887
Pip5k1c;S659	O70161;S659	-0.816724	1.34359	-1.46534	0.150193	0.553887
Reep2;S150	Q8VCD6;S150	0.537694	-2.39493	1.46417	0.150511	0.553887
Slc25a46;S61	Q9CQS4;S61	0.820895	3.47275	1.46401	0.150555	0.553887
Slc9a1;S801	Q61165;S801	-0.747658	0.067188	-1.46711	0.149712	0.553887
Syn1;S436	O88935;S436	-1.67903	1.73576	-1.46413	0.150523	0.553887
Syt5;S95	Q9R0N5;S95	0.495294	0.456731	1.46638	0.149912	0.553887
C2cd2l;S464	Q80X80;S464	-0.957736	3.20445	-1.46285	0.150871	0.553936
Ccdc85a;S342	Q5SP85;S342	0.339409	2.31467	1.46259	0.15094	0.553936
Dnajc6;S478	Q80TZ3;S478	-0.700287	4.9605	-1.46139	0.151268	0.553936
Epb41l1;S544	Q9Z2H5;S544	1.26246	2.19112	1.46161	0.151208	0.553936
Kif3b;S681	Q61771;S681	0.531884	-1.36764	1.462	0.151103	0.553936
Ppp1r12a;T596	Q9DBR7;T596	0.697788	0.489683	1.46144	0.151254	0.553936
Scg2;S176	Q03517;S176	-0.648726	-0.218462	-1.46213	0.151066	0.553936
Sorbs2;S358	Q3UTJ2;S358	0.557953	0.429624	1.46122	0.151314	0.553936
Ahsg;S138	P29699;S138	-0.75465	3.04222	-1.45368	0.153386	0.554206
Apba1;S267	B2RUJ5;S267	-0.660418	-0.971769	-1.45758	0.152312	0.554206
Atxn1l;T328	P0C7T6;T328	0.386195	-0.500648	1.45535	0.152924	0.554206
Clasp2;S413	Q8BRT1;S413	0.768795	1.85566	1.4551	0.152992	0.554206
Clip1;S194	Q922J3;S194	0.454635	-0.145305	1.45703	0.152462	0.554206
Cnksr2;S753	Q80YA9;S753	-0.85276	1.38991	-1.45816	0.152153	0.554206
Ctnna2;S640	Q61301;S640	-0.593805	1.02196	-1.45844	0.152075	0.554206
Dcaf11;S73	Q91VU6;S73	-0.36016	-1.68619	-1.45304	0.153563	0.554206
Dlgap4;S744	B1AZP2;S744	0.601964	0.335057	1.45352	0.153428	0.554206
Dmxl2;S1309	Q8BPN8;S1309	-0.497404	0.921461	-1.45578	0.152807	0.554206
Epb41l2;S86	O70318;S86	0.572971	0.611032	1.45907	0.151904	0.554206
Fam117b;S340	Q3U3E2;S340	-0.390754	-3.85755	-1.45274	0.153646	0.554206
Fmn2;S459	Q9JL04;S459	0.388627	-1.49993	1.45902	0.151915	0.554206
Garnl3;S655	Q3V0G7;S655	0.448625	-0.934358	1.45869	0.152008	0.554206
Jun;S100	P15066;S100	0.41748	-2.68114	1.45246	0.153721	0.554206
Kif2a;S206	P28740;S206	0.497202	-2.76105	1.45524	0.152956	0.554206
Mark4;S423	Q8CIP4;S423	0.546241	1.38951	1.45857	0.152039	0.554206
Mycbp2;S2861	Q7TPH6;S2861	0.386312	0.551097	1.45401	0.153294	0.554206
Necab2;S271	Q91ZP9;S271	0.385186	-2.22991	1.45397	0.153305	0.554206
Nucb1;S456	Q02819;S456	0.468455	-2.06893	1.45487	0.153057	0.554206
Ralgapa1;S859	Q6GYP7;S859	1.10572	1.42061	1.45252	0.153705	0.554206
Rap1gap;T486	A2ALS5;T486	0.832708	-0.616792	1.46011	0.151619	0.554206
Shc3;S354	Q61120;S354	-0.734628	0.596095	-1.45617	0.152698	0.554206
Slc6a17;S13	Q8BJI1;S13	-0.644509	4.48646	-1.45333	0.153481	0.554206
Sorbs2;S577	Q3UTJ2;S577	-0.829162	-0.741066	-1.45988	0.151682	0.554206
Sort1;S819	Q6PHU5;S819	-0.830573	1.85266	-1.45893	0.151941	0.554206
Synpo;S882	Q8CC35;S882	-0.652879	-0.183904	-1.45305	0.15356	0.554206
Tmem55b;S169	Q3TWL2;S169	0.440495	2.4323	1.45735	0.152375	0.554206
Tp53bp1;S1115	P70399;S1115	0.37117	-2.53944	1.45308	0.15355	0.554206
Zdhhc8;S335	Q5Y5T5;S335	-0.501684	0.0868119	-1.4535	0.153435	0.554206
Aqr;T888	Q8CFQ3;T888	-1.18901	-1.13445	-1.45078	0.154188	0.554451
Cep170;S1102	Q6A065;S1102	0.543452	-0.957168	1.4512	0.154071	0.554451
Dpy19l1;S23	A6X919;S23	0.574611	0.385396	1.45091	0.154152	0.554451
Hcn2;S757	O88703;S757	0.799737	1.28798	1.44997	0.154412	0.554451
Iqsec2;S1133	Q5DU25;S1133	0.504677	-0.25753	1.45036	0.154304	0.554451
Map1a;S1606	Q9QYR6;S1606	0.327019	3.45807	1.45062	0.154233	0.554451
Prkcg;S70	P63318;S70	0.962772	-2.07426	1.45084	0.15417	0.554451
Psmd2;T20	Q8VDM4;T20	0.379915	2.15225	1.45021	0.154346	0.554451
Begain;S265	Q68EF6;S265	-0.481228	-0.525401	-1.44885	0.154723	0.555288
Gapvd1;S758	Q6PAR5;S758	-0.627747	-0.08631	-1.44699	0.155242	0.556029
Map6d1;S38	Q14BB9;S38	-0.798282	0.284645	-1.44725	0.155168	0.556029
Nwd2;S792	Q6P5U7;S792	-0.387527	-2.20538	-1.44733	0.155147	0.556029
Plcd3;S492	Q8K2J0;S492	-0.74873	-1.31326	-1.44732	0.155149	0.556029
Dock10;S292	Q8BZN6;S292	0.444578	-2.48916	1.4454	0.155686	0.556779
Map7d1;S115	A2AJI0;S115	0.662762	1.68761	1.44555	0.155643	0.556779
Spag9;S203	Q58A65;S203	0.545345	-1.4776	1.44593	0.155536	0.556779
Samd4b;S172	Q80XS6;S172	-0.397619	-0.669758	-1.4451	0.155769	0.556799
Ahcyl2;S23	Q68FL4;S23	-0.473912	1.33032	-1.44477	0.155861	0.556801
Rem2;S295	Q8VEL9;S295	0.434801	0.277441	1.44454	0.155926	0.556801
Uhrf1bp1l;S414	A2RSJ4;S414	0.633134	0.819199	1.4435	0.156217	0.557559
Aqr;Y895	Q8CFQ3;Y895	-1.2473	-1.28126	-1.44291	0.156381	0.557866
Abcf1;S138	Q6P542;S138	-0.566795	0.0503177	-1.44254	0.156484	0.557955
[truncated: 5,126 more rows]

## Sheet: Supplementary DataS3C_male
Supplementary DataS3C Analysis of differentially expressed PTM (DEPTM) in 5xFAD-DUSP4vs5xFAD in male mouse
siteIDs	uniprotIDs	logFC	AveExpr	t	P.Value	adj.P.Val
Plcb1;S982	Q9Z1B3;S982	-4.79849	0.670635	-5.11826	7.06279e-06	0.0503153
Prrt2;S98	E9PUL5;S98	2.8486	2.1001	4.39742	7.20924e-05	0.256793
Dnajc5;T11	P60904;T11	2.36704	-2.98224	4.23507	0.000120061	0.285105
Srrm2;S1077	Q8BTI8;S1077	-1.43881	1.89629	-4.04075	0.00021926	0.390502
Arhgap32;S1688	Q811P8;S1688	-1.55553	-3.20649	-3.91059	0.000326388	0.427427
Camkv;T446	Q3UHL1;T446	1.75319	3.22672	3.83586	0.000409239	0.427427
Spred1;S239	Q924S8;S239	-1.39141	0.662019	-3.82726	0.000419987	0.427427
Ano3;S631	A2AHL1;S631	-1.24838	1.26638	-3.49983	0.00110724	0.689447
Camlg;S53	P49070;S53	-2.91449	-0.324585	-3.45573	0.00125811	0.689447
Mkl2;S209	P59759;S209	1.78816	1.56649	3.46	0.00124271	0.689447
Rtn4;S489	Q99P72;S489	3.47564	0.221819	3.47604	0.00118636	0.689447
Snx27;S49	Q3UHD6;S49	-0.997176	1.68572	-3.46104	0.00123897	0.689447
Stx1a;S64	O35526;S64	-0.960405	2.70569	-3.47201	0.00120028	0.689447
Arhgap35;S975	Q91YM2;S975	1.24395	2.98979	3.16941	0.00283157	0.751002
Atp5b;T285	P56480;T285	1.06777	-3.07989	3.30123	0.00195699	0.751002
Atp8a1;S1124	P70704;S1124	2.0596	0.662368	3.03204	0.00412905	0.751002
Bcan;T544	Q61361;T544	-1.15892	0.010276	-2.98649	0.00467052	0.751002
Bcl11b;S664	Q99PV8;S664	-1.02068	-1.35568	-3.0305	0.00414632	0.751002
Bclaf1;S289	Q8K019;S289	-0.949399	1.4622	-3.00651	0.00442488	0.751002
Cacng8;S251	Q8VHW2;S251	-0.981836	1.22277	-2.96808	0.00490784	0.751002
Clasp2;S319	Q8BRT1;S319	-0.93915	0.298012	-2.97598	0.00480464	0.751002
Dync1li1;S516	Q8R1Q8;S516	2.38967	2.45085	3.19873	0.00260982	0.751002
Esyt2;S667	Q3TZZ7;S667	1.19856	-0.190304	3.11121	0.00332565	0.751002
Fam21;S723	Q6PGL7;S723	-1.39705	1.47593	-3.06111	0.0038149	0.751002
Hcn2;S757	O88703;S757	-2.04353	1.28798	-3.3609	0.00165179	0.751002
Hspa4l;S579	P48722;S579	-0.977231	-1.92783	-3.03434	0.00410335	0.751002
Itsn2;S843	Q9Z0R6;S843	-1.15301	0.848078	-3.02558	0.00420214	0.751002
Kiaa1468;S244	Q148V7;S244	-0.776761	2.80791	-3.04417	0.00399511	0.751002
Lgalsl;S25	Q8VED9;S25	-1.03665	4.16062	-3.27477	0.00210879	0.751002
Lmtk2;S742	Q3TYD6;S742	-0.935963	-2.13558	-3.06143	0.00381154	0.751002
Map1s;S577	Q8C052;S577	1.87711	0.413316	3.16401	0.00287436	0.751002
Mark1;S444	Q8VHJ5;S444	-1.15001	0.847148	-3.37725	0.00157643	0.751002
Mkl1;T488	Q8K4J6;T488	1.25848	-0.320083	3.02841	0.00416994	0.751002
N4bp1;S299	Q6A037;S299	-0.945579	-1.03969	-3.08751	0.0035492	0.751002
Nfix;S361	P70257;S361	-0.962544	-1.70366	-3.09203	0.00350548	0.751002
Nhsl2;T284	B1AXH1;T284	-1.03049	-1.00997	-2.95312	0.00510886	0.751002
Pbxip1;S164	Q3TVI8;S164	-1.00599	0.616227	-3.24317	0.00230481	0.751002
Pde11a;S163	P0C1Q2;S163	1.15033	0.012811	3.06829	0.00374084	0.751002
Ppp1r9b;S94	Q6R891;S94	-0.778606	-0.758809	-3.13605	0.00310558	0.751002
Rab11fip2;S227	G3XA57;S227	-1.09653	0.929044	-2.95811	0.00504096	0.751002
Rbm15;T567	Q0VBL3;T567	-0.766774	-0.391033	-2.949	0.00516551	0.751002
Scn2a1;S589	B1AWN6;S589	-1.51746	0.398918	-3.2742	0.0021122	0.751002
Shank3;S694	Q4ACU6;S694	1.01815	-1.36806	3.0278	0.00417686	0.751002
Srcin1;S569	Q9QWI6;S569	2.32802	2.15158	2.96273	0.00497879	0.751002
Srrm2;S1216	Q8BTI8;S1216	-0.864072	1.60996	-3.1849	0.00271235	0.751002
Stk39;T366	Q9Z1W9;T366	-1.3062	0.396525	-2.96686	0.00492395	0.751002
Tubb4b;T232	P68372;T232	1.49353	-0.548942	2.97612	0.00480278	0.751002
Ube2e3;S12	P52483;S12	-1.03041	1.49953	-2.96403	0.00496149	0.751002
Znf638;S1099	Q61464;S1099	-0.893778	-2.27036	-2.95176	0.00512741	0.751002
Cacna1b;S2244	O55017;S2244	-0.92031	1.24566	-2.87872	0.00622807	0.770715
Cep170b;S881	Q80U49;S881	-1.78353	-1.60436	-2.85313	0.00666314	0.770715
Cic;S1403	Q924A2;S1403	-0.90503	-2.59739	-2.86344	0.00648451	0.770715
Clip1;S194	Q922J3;S194	-1.00009	-0.145305	-2.90741	0.00577183	0.770715
Grasp;T76	Q9JJA9;T76	-1.25632	-1.39298	-2.858	0.00657821	0.770715
Irs2;S616	P81122;S616	-0.957874	-1.55361	-2.90472	0.00581326	0.770715
Lmnb2;S427	P21619;S427	2.28212	0.932855	2.83571	0.00697538	0.770715
Lmtk2;S784	Q3TYD6;S784	1.06148	-1.07866	2.83307	0.00702391	0.770715
Map1a;S873	Q9QYR6;S873	1.97768	-0.00222468	2.85137	0.00669403	0.770715
Map3k7;S412	Q62073;S412	-1.08462	0.635331	-2.84431	0.00681961	0.770715
Nbea;S1311	Q9EPN1;S1311	1.98864	0.160936	2.85947	0.00655275	0.770715
Nek1;S618	P51954;S618	-0.992021	-1.67451	-2.91595	0.00564205	0.770715
Prkar2a;S96	P12367;S96	-1.38079	4.3823	-2.82106	0.00724845	0.770715
Sntb2;S75	Q61235;S75	-0.836269	0.153852	-2.9306	0.00542602	0.770715
Stxbp5;S903	Q8K400;S903	-2.01186	3.01208	-2.82142	0.00724167	0.770715
Tp53bp1;S1096	P70399;S1096	-1.20559	1.04477	-2.8797	0.00621186	0.770715
Vps13c;S2442	Q8BX70;S2442	-1.02073	-0.798957	-2.82183	0.00723382	0.770715
Wipf3;S211	P0C7L0;S211	-0.900363	3.35859	-2.85418	0.00664481	0.770715
Arfgap2;S239	Q99K28;S239	-1.09064	0.967061	-2.80474	0.00756424	0.770869
Mical3;S1216	Q8CJ19;S1216	-1.16913	0.831108	-2.79878	0.00768272	0.770869
Nyap2;S120	Q8BM65;S120	1.06341	0.0910165	2.8027	0.00760464	0.770869
Phactr4;S118	Q501J7;S118	-1.02926	-0.297498	-2.80235	0.00761157	0.770869
Ank2;S1936	Q8C8R3;S1936	1.63367	0.454069	2.7233	0.00933997	0.790776
Ano3;S636	A2AHL1;S636	-0.993765	1.2895	-2.72374	0.00932953	0.790776
Ap2a1;S655	P17426;S655	1.56215	1.80492	2.6836	0.0103388	0.790776
Arhgap21;S314	Q6DFV3;S314	-0.90123	2.13997	-2.61095	0.0124251	0.790776
Arhgap21;S874	Q6DFV3;S874	-0.523655	2.9688	-2.64339	0.0114497	0.790776
Brsk2;S383	Q69Z98;S383	-1.46479	-0.634241	-2.73281	0.00911449	0.790776
Bsn;S733	O88737;S733	-1.64913	2.09869	-2.61263	0.0123728	0.790776
Ccdc85a;S295	Q5SP85;S295	-0.985163	0.862551	-2.68188	0.0103841	0.790776
Ccny;S326	Q8BGU5;S326	-0.671652	3.31386	-2.69727	0.00998414	0.790776
Clip2;S295	Q9Z0H8;S295	-0.651032	1.2029	-2.72256	0.00935777	0.790776
Dlg2;S323	Q91XM9;S323	-1.35158	-0.369613	-2.65398	0.011147	0.790776
Dnajc6;S490	Q80TZ3;S490	1.87008	3.21753	2.75103	0.00869604	0.790776
Dtd1;S197	Q9DD18;S197	1.37462	-1.48816	2.69158	0.0101305	0.790776
Epb41l1;T488	Q9Z2H5;T488	1.4083	2.93968	2.61072	0.0124322	0.790776
Fmn1;S234	Q05860;S234	0.971314	-1.0027	2.66895	0.0107315	0.790776
Grm5;S839	Q3UVX5;S839	-0.869764	2.49313	-2.62109	0.0121125	0.790776
Gtpbp1;S8	O08582;S8	-0.826998	2.18559	-2.6286	0.0118855	0.790776
Kcna2;S441	P63141;S441	1.71215	0.274752	2.69187	0.0101229	0.790776
Lmtk2;S1418	Q3TYD6;S1418	-0.688944	-0.872696	-2.74029	0.00894044	0.790776
Map1a;S1648	Q9QYR6;S1648	-0.873358	6.71152	-2.62691	0.0119361	0.790776
Map4;S99	P27546;S99	-1.50491	0.93038	-2.76845	0.00831299	0.790776
Map6;S207	Q7TSJ2;S207	-1.25912	-0.275976	-2.65045	0.0112472	0.790776
Mast3;S107	Q3U214;S107	-0.908079	0.30003	-2.62161	0.0120964	0.790776
Mast3;S803	Q3U214;S803	-1.35353	-2.66996	-2.63762	0.011618	0.790776
Mmgt1;S120	Q8K273;S120	-0.966148	-1.81371	-2.71207	0.00961306	0.790776
Nbea;S2565	Q9EPN1;S2565	0.934525	-2.04831	2.63749	0.0116219	0.790776
Pkp4;S446	Q68FH0;S446	-0.8843	0.774331	-2.61903	0.0121754	0.790776
Prkar1a;S77	Q9DBC7;S77	-1.03337	1.91147	-2.64275	0.0114684	0.790776
Prox1;S220	P48437;S220	-0.982436	-0.291239	-2.71955	0.00943038	0.790776
Prrt2;T214	E9PUL5;T214	1.74762	1.30893	2.77061	0.00826641	0.790776
Shank2;T903	Q80Z38;T903	-1.73432	3.15878	-2.64104	0.0115181	0.790776
Shank3;S375	Q4ACU6;S375	-1.43165	1.94046	-2.63864	0.0115881	0.790776
Sptbn1;S2340	Q62261;S2340	-2.13231	3.77297	-2.61653	0.012252	0.790776
Syn1;S438	O88935;S438	1.98812	2.76958	2.69836	0.00995639	0.790776
Synj1;S1049	Q8CHC4;S1049	-2.05816	3.27019	-2.74246	0.00889069	0.790776
Synj1;T1048	Q8CHC4;T1048	-2.86027	3.01878	-2.73191	0.00913551	0.790776
Synpo;S882	Q8CC35;S882	1.36773	-0.183904	2.76128	0.00846866	0.790776
Tanc1;S1665	Q0VGY8;S1665	0.847295	0.255187	2.64062	0.0115303	0.790776
Tanc1;S445	Q0VGY8;S445	1.0445	-1.07537	2.71719	0.00948766	0.790776
Tuba1b;T361	P05213;T361	-0.679457	0.0873921	-2.68377	0.0103342	0.790776
Zdhhc5;S425	Q8VDZ4;S425	-0.687838	-2.90784	-2.6474	0.0113344	0.790776
Mff;S151	Q6PCP5;S151	1.21412	-0.135814	2.60107	0.012737	0.802995
Ahsg;S309	P29699;S309	-1.30769	-1.08186	-2.55185	0.0143997	0.805457
Ap3d1;T758	O54774;T758	1.42392	0.756521	2.58293	0.0133281	0.805457
Atp1a2;S439	Q6PIE5;S439	1.76993	-0.0806654	2.5575	0.0141993	0.805457
Camsap2;S836	Q8C1B1;S836	-0.624161	-0.357208	-2.58055	0.0134075	0.805457
Gm996;S499	A2AJA9;S499	-0.628485	2.12409	-2.56777	0.0138414	0.805457
Itpr1;S1588	P11881;S1588	2.57843	0.67025	2.56757	0.0138484	0.805457
Khdrbs1;S58	Q60749;S58	1.41338	1.26676	2.54619	0.0146032	0.805457
Kiaa1211;S409	Q5PR69;S409	1.46124	-0.760063	2.54632	0.0145985	0.805457
Map1a;T1472	Q9QYR6;T1472	-0.779962	-0.379419	-2.59137	0.0130502	0.805457
Mtor;S567	Q9JLN9;S567	1.17591	-3.16118	2.55507	0.0142852	0.805457
Nucb1;S368	Q02819;S368	-0.723787	-1.24183	-2.55449	0.014306	0.805457
Sgip1;T180	Q8VD37;T180	1.8707	1.75982	2.57816	0.0134878	0.805457
Sik3;S493	Q6P4S6;S493	-0.866046	1.19953	-2.57515	0.0135892	0.805457
Sphkap;S1244	Q6NSW3;S1244	-1.19245	-0.75029	-2.54051	0.0148102	0.805457
Sptbn1;S2337	Q62261;S2337	1.85446	-1.58995	2.55503	0.0142868	0.805457
Sucla2;S279	Q9Z2I9;S279	-0.93383	-0.0257757	-2.57254	0.013678	0.805457
Syn3;S461	Q8JZP2;S461	-0.904044	1.94416	-2.54048	0.0148112	0.805457
Vim;S39	P20152;S39	-1.0639	-0.660516	-2.5911	0.0130589	0.805457
Crtc2;S70	Q3U182;S70	1.08085	-0.623949	2.53024	0.0151906	0.807025
Gsk3a;S278	Q2NL51;S278	-0.911145	-0.289241	-2.52452	0.0154064	0.807025
Huwe1;T3930	Q7TMY8;T3930	1.07334	-0.576444	2.52809	0.0152714	0.807025
Map3k13;S680	Q1HKZ5;S680	-0.669956	-0.334521	-2.53614	0.0149708	0.807025
Pitpnm3;S946	Q3UHE1;S946	-0.659227	1.02267	-2.52585	0.0153561	0.807025
Ablim1;S475	Q8K4G5;S475	-0.681139	3.55476	-2.51754	0.0156739	0.814885
Caskin1;S1069	Q6P9K8;S1069	0.917655	-0.9351	2.49832	0.0164315	0.814885
Chka;S71	O54804;S71	0.764829	-2.04809	2.49719	0.016477	0.814885
Fkbp3;S36	Q62446;S36	-0.647553	-0.613375	-2.49779	0.0164529	0.814885
Hist1h1c;S2	P15864;S2	-0.716798	-0.590277	-2.49036	0.0167548	0.814885
Macf1;S1367	Q9QXZ0;S1367	1.36989	-2.95425	2.48966	0.0167837	0.814885
Mdh1;S241	P14152;S241	1.9471	1.11244	2.48338	0.0170435	0.814885
Nsun2;S723	Q1HFZ0;S723	-0.872903	1.34049	-2.48572	0.0169461	0.814885
Otud7a;T829	Q8R554;T829	-0.617941	1.16117	-2.48482	0.0169837	0.814885
Sept4;S117	P28661;S117	1.54692	1.25735	2.51104	0.0159264	0.814885
Shisa6;T288	Q3UH99;T288	-1.14349	2.72089	-2.50451	0.0161841	0.814885
Srrm2;S1360	Q8BTI8;S1360	-0.642216	2.38044	-2.48572	0.0169464	0.814885
Tnks1bp1;S866	P58871;S866	-0.729035	1.23125	-2.49844	0.0164268	0.814885
Adcyap1r1;S462	P70205;S462	-0.608484	3.43778	-2.43813	0.0190252	0.816156
Ank2;S1428	Q8C8R3;S1428	-1.91113	1.40005	-2.424	0.0196849	0.816156
Ank2;T3745	Q8C8R3;T3745	-1.62619	3.86631	-2.41911	0.0199186	0.816156
Cacna1a;S1981	P97445;S1981	0.902571	-0.56393	2.47781	0.0172769	0.816156
Carkd;Y81	Q9CZ42;Y81	0.826214	-1.58162	2.42493	0.0196411	0.816156
Cask;S51	O70589;S51	0.867008	-1.72046	2.41922	0.0199131	0.816156
Cldn12;S231	Q9ET43;S231	-1.76607	-0.0551565	-2.42521	0.019628	0.816156
Kiaa1107;S481	Q80TK0;S481	-0.865776	3.27424	-2.4375	0.0190541	0.816156
Lppr3;S320	Q7TPB0;S320	-0.634929	0.0249319	-2.41878	0.0199342	0.816156
Map2;S1165	P20357;S1165	0.866847	-1.56356	2.44331	0.0187881	0.816156
Mark1;S423	Q8VHJ5;S423	-0.602026	-2.39508	-2.43202	0.0193078	0.816156
Numa1;S167	E9Q7G0;S167	-0.879327	-0.874778	-2.46212	0.01795	0.816156
Otud7a;S771	Q8R554;S771	0.884475	-0.181837	2.47352	0.0174584	0.816156
Plekho2;T233	Q8K124;T233	-1.01741	-0.53459	-2.41997	0.0198774	0.816156
Rasip1;S322	Q3U0S6;S322	-0.730314	-3.0787	-2.44852	0.0185522	0.816156
Rims1;S745	Q99NE5;S745	1.6116	-1.10713	2.46073	0.0180104	0.816156
Sh2b1;S126	Q91ZM2;S126	-0.846432	0.801948	-2.43443	0.0191961	0.816156
Sh2b1;S127	Q91ZM2;S127	-0.846432	0.801948	-2.43443	0.0191961	0.816156
Shank1;S898	D3YZU1;S898	-1.79242	2.00379	-2.43461	0.0191875	0.816156
Sipa1l2;S195	Q80TE4;S195	-0.954993	-1.55724	-2.43189	0.0193142	0.816156
Slain2;S414	Q8CI08;S414	-0.672043	-2.67766	-2.43575	0.0191345	0.816156
Syp;Y81	Q62277;Y81	-0.631939	2.48754	-2.45184	0.0184035	0.816156
Thumpd1;S8	Q99J36;S8	1.0297	1.08637	2.43078	0.0193657	0.816156
Tnik;S651	P83510;S651	-1.78732	1.81434	-2.45276	0.0183626	0.816156
Top2b;S1387	Q64511;S1387	0.964104	2.26388	2.42617	0.0195826	0.816156
Agap2;S382	Q3UHD9;S382	-1.27398	1.36382	-2.41393	0.0201681	0.81753
Atg2a;S1607	Q6P4T0;S1607	0.96799	1.56561	2.41277	0.0202245	0.81753
Clip2;S50	Q9Z0H8;S50	-1.21799	1.55205	-2.40863	0.0204268	0.81753
Hepacam;S352	Q640R3;S352	-0.637674	2.34535	-2.40916	0.020401	0.81753
Aak1;S622	Q3UHJ0;S622	-0.566272	1.13907	-2.18536	0.0344275	0.826861
Aak1;S650	Q3UHJ0;S650	-0.859717	2.48023	-2.27908	0.0277501	0.826861
Abr;S53	Q5SSL4;S53	-1.49218	0.134008	-2.06087	0.0454732	0.826861
Acin1;S710	Q9JIX8;S710	0.96763	-0.616492	2.3225	0.0250688	0.826861
Adcy1;S550	O88444;S550	0.907287	-0.271479	2.13809	0.0383059	0.826861
Add1;T614	Q9QYC0;T614	-0.698538	5.10729	-2.10279	0.041449	0.826861
Add2;S530	Q9QYB8;S530	1.44464	1.24158	2.35936	0.0229773	0.826861
Agap2;S632	Q3UHD9;S632	-0.586662	1.53314	-2.25867	0.0290974	0.826861
Akt1s1;S213	Q9D1F4;S213	-0.524527	-0.304587	-2.09857	0.0418396	0.826861
Akt3;S472	Q9WUA6;S472	-1.06554	-1.2911	-2.04453	0.0471317	0.826861
Alox8;S77	O35936;S77	-1.00697	1.84216	-2.15634	0.0367656	0.826861
Als2;T504	Q920R0;T504	0.849432	-1.37576	2.13928	0.0382042	0.826861
Amer2;S280	Q8CCJ4;S280	-0.634941	0.796376	-2.06938	0.0446301	0.826861
Amer2;S340	Q8CCJ4;S340	-0.52489	-1.35077	-2.1538	0.0369767	0.826861
Amph;S500	Q7TQF7;S500	-1.14011	5.09206	-2.34084	0.0240075	0.826861
Amph;T274	Q7TQF7;T274	-2.17571	1.37105	-2.31426	0.0255591	0.826861
Ank2;T2232	Q8C8R3;T2232	0.882162	1.03025	2.12794	0.0391874	0.826861
Ap2a1;T653	P17426;T653	1.59966	1.24756	2.14634	0.0376028	0.826861
Aprt;S15	P08030;S15	-0.783175	-4.58014	-2.11841	0.0400319	0.826861
Arfgap1;S347	Q9EPJ9;S347	0.897472	0.909591	2.18923	0.0341257	0.826861
Arfgef3;S1881	Q3UGY8;S1881	-0.989917	-1.71625	-2.30002	0.0264267	0.826861
Arhgef6;S224	Q8K4I3;S224	-0.714412	3.53809	-2.1401	0.0381336	0.826861
Atp1b1;T78	P14094;T78	-0.592582	-1.72629	-2.16094	0.0363852	0.826861
Atxn1l;T328	P0C7T6;T328	-0.608861	-0.500648	-2.08133	0.0434682	0.826861
Atxn2;S653	O70305;S653	-0.556159	0.0173906	-2.12906	0.0390895	0.826861
Baiap2;S326	Q8BKX1;S326	1.72581	1.58487	2.30511	0.0261134	0.826861
Bcas1;S525	Q80YN3;S525	-0.778177	1.15792	-2.22641	0.0313451	0.826861
Bclaf1;Y283	Q8K019;Y283	-0.831007	-0.463111	-2.10298	0.0414321	0.826861
C2cd5;S659	Q7TPS5;S659	-1.68347	1.14986	-2.21083	0.0324846	0.826861
Cacna1a;S450	P97445;S450	0.76397	-1.08443	2.1335	0.0387029	0.826861
Cacna1e;S794	Q61290;S794	1.15514	-1.0865	2.20908	0.0326151	0.826861
Camk2a;S330	P11798;S330	2.36725	2.76291	2.09489	0.0421831	0.826861
Camk2b;T287	P28652;T287	-1.7953	3.78565	-2.05684	0.0458773	0.826861
Camsap2;S905	Q8C1B1;S905	-0.69973	-1.88338	-2.04809	0.0467658	0.826861
Camsap2;S910	Q8C1B1;S910	-0.642305	-1.72047	-2.07573	0.0440091	0.826861
Caskin1;S1363	Q6P9K8;S1363	-0.841222	1.08775	-2.3374	0.0242036	0.826861
Caskin1;S759	Q6P9K8;S759	0.889385	-0.751814	2.11536	0.0403047	0.826861
Ccdc88a;S1417	Q5SNZ0;S1417	-0.679789	-1.80781	-2.12714	0.0392583	0.826861
Cdc37l1;S88	Q9CZP7;S88	-0.799146	-0.644495	-2.18293	0.0346181	0.826861
Cdip1;T27	Q9DB75;T27	1.28447	0.447935	2.2707	0.0282962	0.826861
Cdk14;S24	O35495;S24	-0.816915	-2.13671	-2.19356	0.0337913	0.826861
Cdk5r2;T84	O35926;T84	-0.91603	0.833944	-2.26004	0.0290052	0.826861
Cdkn1b;S10	P46414;S10	1.16755	-0.555573	2.38321	0.0217087	0.826861
Cep170;S1008	Q6A065;S1008	-0.975472	1.45104	-2.19748	0.0334901	0.826861
Chd8;S1997	Q09XV5;S1997	-0.607948	-1.84854	-2.18156	0.0347254	0.826861
Cic;S778	Q924A2;S778	-0.809924	-0.512961	-2.25438	0.0293872	0.826861
Clasp2;S14	Q8BRT1;S14	-0.83063	2.12076	-2.09368	0.0422957	0.826861
Cldn11;S194	Q60771;S194	-1.17407	2.05428	-2.3184	0.0253113	0.826861
Clip1;S146	Q922J3;S146	2.04069	-1.15303	2.14095	0.038061	0.826861
Cmtm4;S194	Q8CJ61;S194	0.651685	1.08299	2.04988	0.0465827	0.826861
Cnksr2;T339	Q80YA9;T339	-0.911592	2.69322	-2.07114	0.0444571	0.826861
Cnnm2;S749	Q3TWN3;S749	0.832179	0.00161233	2.06458	0.0451043	0.826861
Cntf;S7	P51642;S7	-0.820968	-2.25366	-2.22178	0.0316797	0.826861
Cttn;S405	Q60598;S405	1.96043	2.0229	2.23847	0.0304873	0.826861
Dbn1;T394	Q9QXS6;T394	-1.56545	-0.138463	-2.32464	0.024943	0.826861
Dlg4;S295	Q62108;S295	2.04125	-1.53736	2.07309	0.0442663	0.826861
Dnm1;T776	P39053;T776	2.32131	0.430497	2.11173	0.0406329	0.826861
Dnm3;S763	Q8BZ98;S763	1.47821	-0.431561	2.34795	0.0236069	0.826861
Dock4;S1616	P59764;S1616	1.42751	0.316561	2.04397	0.0471891	0.826861
Dock4;S1933	P59764;S1933	-0.903412	-0.764448	-2.05698	0.0458633	0.826861
Dopey2;S679	Q3UHQ6;S679	-1.26374	-2.90251	-2.05741	0.0458199	0.826861
Dpf2;S244	Q61103;S244	-1.10893	0.820478	-2.32757	0.0247713	0.826861
Dpysl2;S402	O08553;S402	0.884631	-3.61021	2.31919	0.0252648	0.826861
Dpysl2;S542	O08553;S542	-0.818882	2.61617	-2.26453	0.0287042	0.826861
Dpysl3;T508	Q62188;T508	1.65901	-0.807111	2.2668	0.0285534	0.826861
Dst;S7336	Q91ZU6;S7336	0.894663	-0.0188582	2.08423	0.0431908	0.826861
Eepd1;T134	Q3TGW2;T134	-1.27831	-1.59589	-2.17686	0.0350977	0.826861
Ehbp1;S646	Q69ZW3;S646	-0.815411	-0.200179	-2.04154	0.0474407	0.826861
Eif4enif1;S949	Q9EST3;S949	1.01281	-1.70851	2.09153	0.0424986	0.826861
Eif5b;S137	Q05D44;S137	-0.697928	1.2462	-2.22103	0.0317341	0.826861
Eno1;T272	P17182;T272	1.39784	-4.12267	2.19406	0.0337525	0.826861
Epb41l2;S396	Q9Z2H5;S396	2.39084	-0.328249	2.12852	0.0391367	0.826861
Epn2;S173	Q8CHU3;S173	-0.644256	1.86961	-2.23089	0.0310234	0.826861
Erich5;S62	Q8K0S2;S62	1.44509	-1.81101	2.2661	0.0286004	0.826861
Esyt2;S662	Q3TZZ7;S662	-0.979253	0.166717	-2.21094	0.0324763	0.826861
Exosc5;S23	Q9CRA8;S23	-0.93529	-0.340747	-2.29631	0.026657	0.826861
Fam13c;T125	Q9DBR2;T125	-1.96646	-2.08743	-2.13017	0.0389928	0.826861
Farp1;T24	F8VPU2;T24	-0.732159	4.04996	-2.33786	0.0241771	0.826861
Fbxo42;S365	Q6PDJ6;S365	-0.913095	-0.0419428	-2.08944	0.0426957	0.826861
Fmnl1;S184	Q9JL26;S184	-0.591291	1.73488	-2.30213	0.0262965	0.826861
Fnbp1l;S489	Q8K012;S489	-2.20489	-0.0144678	-2.07117	0.0444544	0.826861
Foxo3;S7	Q9WVH4;S7	0.927883	-1.40914	2.1874	0.0342682	0.826861
Fth1;S5	P09528;S5	0.808394	0.738835	2.11356	0.040467	0.826861
G3bp1;S231	P97855;S231	-0.985486	3.80011	-2.34406	0.0238253	0.826861
Gapvd1;S761	Q6PAR5;S761	0.977282	-0.6077	2.13591	0.0384938	0.826861
Gas7;S108	Q60780;S108	2.21269	-1.32754	2.33209	0.0245088	0.826861
Gfap;T40	P03995;T40	-1.10857	0.148935	-2.36563	0.0226372	0.826861
Git1;S601	Q68FF6;S601	-0.670464	2.65133	-2.28045	0.0276621	0.826861
Gpr158;S806	Q8C419;S806	0.944874	-0.25071	2.12072	0.0398257	0.826861
Gprc5b;S369	Q923Z0;S369	-0.814341	-0.0243825	-2.29115	0.02698	0.826861
Grin2b;S917	Q01097;S917	1.41426	-1.01339	2.15753	0.0366665	0.826861
Gstp1;S196	P19157;S196	0.764559	-1.626	2.14031	0.0381156	0.826861
Habp4;S108	Q9JKS5;S108	-0.505327	0.465778	-2.06346	0.0452151	0.826861
Hcn2;S771	O88703;S771	1.36364	1.3056	2.23309	0.0308673	0.826861
Hcn2;S842	O88703;S842	1.26723	-0.0927664	2.04176	0.0474187	0.826861
Hist1h1b;S2	P43276;S2	-0.926396	0.0717342	-2.11366	0.0404578	0.826861
Hist1h1e;S2	P43274;S2	-0.626495	3.03538	-2.10291	0.041438	0.826861
Hnrnpa3;S116	Q8BG05;S116	-0.971503	1.4858	-2.35069	0.0234544	0.826861
Hnrnpc;S121	Q9Z204;S121	-1.33566	-1.25374	-2.25812	0.0291342	0.826861
Hnrnpul1;S195	Q8VDM6;S195	-0.783388	0.286605	-2.31314	0.025626	0.826861
Hsp90aa1;S263	P07901;S263	-0.881921	5.22985	-2.08202	0.0434019	0.826861
Huwe1;S3922	Q7TMY8;S3922	0.885401	0.821949	2.16095	0.0363849	0.826861
Igf2r;S2476	Q07113;S2476	1.27912	-2.09524	2.13575	0.0385083	0.826861
Iqsec1;S362	Q8R0S2;S362	1.21682	0.410809	2.08235	0.0433708	0.826861
Irf2bp2;S300	E9Q1P8;S300	-0.948068	-0.627492	-2.34668	0.0236785	0.826861
Irf2bpl;S195	Q8K3X4;S195	-1.04485	0.44074	-2.05305	0.0462605	0.826861
Jph1;T161	Q9ET80;T161	-0.974935	-0.745102	-2.2128	0.0323387	0.826861
Jph3;S578	Q9ET77;S578	-0.533319	1.11631	-2.09221	0.0424342	0.826861
Kcnq3;T82	Q8K3F6;T82	-0.743924	-2.18411	-2.22732	0.0312792	0.826861
Kiaa1671;S64	Q8BRV5;S64	1.059	0.116473	2.24939	0.0297286	0.826861
Kndc1;S267	Q0KK55;S267	-0.617702	-2.88464	-2.21913	0.0318727	0.826861
Llgl1;S986	Q80Y17;S986	-0.819808	0.56251	-2.05518	0.046045	0.826861
Lrfn4;S627	Q80XU8;S627	0.729259	-0.578303	2.11377	0.040448	0.826861
Lrp1b;S1992	Q9JI18;S1992	-0.628175	1.45952	-2.25739	0.0291832	0.826861
Lrp1b;Y1988	Q9JI18;Y1988	-0.628175	1.45952	-2.25739	0.0291832	0.826861
Luzp1;S660	Q8R4U7;S660	1.18365	0.0100369	2.31997	0.0252182	0.826861
Map1a;S1315	Q9QYR6;S1315	-1.14801	-1.92336	-2.20082	0.0332361	0.826861
Map1a;S2603	Q9QYR6;S2603	2.96688	0.164907	2.21335	0.0322974	0.826861
Map1a;T893	Q9QYR6;T893	2.489	-0.785723	2.12332	0.0395948	0.826861
Map2;S1728	P20357;S1728	-0.829092	-2.29833	-2.15358	0.0369945	0.826861
Map2;S550	P20357;S550	-0.891043	-1.21509	-2.13122	0.0389012	0.826861
Map2;T1617	P20357;T1617	-2.1845	0.94163	-2.23863	0.0304759	0.826861
Map2k4;S255	P47809;S255	0.521159	0.0474255	2.07102	0.0444688	0.826861
Map4;T658	P27546;T658	-0.935935	-0.666434	-2.10053	0.0416584	0.826861
Map7d1;S282	A2AJI0;S282	-0.910725	-1.67737	-2.34355	0.023854	0.826861
Mapt;S288	P10637;S288	-1.00364	0.433457	-2.30474	0.0261364	0.826861
Mapt;S554	P10637;S554	1.73152	1.19785	2.24671	0.029913	0.826861
Marcks;S140	P26645;S140	1.0728	1.28918	2.08887	0.0427498	0.826861
Marcks;S152	P26645;S152	2.81579	1.70158	2.17897	0.0349301	0.826861
Marcks;S46	P26645;S46	-0.666454	2.87703	-2.27075	0.0282932	0.826861
Mark1;S393	Q8VHJ5;S393	-1.04361	0.227962	-2.30832	0.0259175	0.826861
Mark2;S409	Q05512;S409	-0.597715	-0.212821	-2.1995	0.0333365	0.826861
Mast1;S1121	Q9R1L5;S1121	-1.34159	-1.28873	-2.22876	0.0311758	0.826861
Mast1;S139	Q9R1L5;S139	0.820206	0.359013	2.1934	0.033803	0.826861
Mast3;S1156	Q3U214;S1156	-0.740696	1.69757	-2.19041	0.0340338	0.826861
Mast3;S1289	Q3U214;S1289	-0.776912	0.29159	-2.16924	0.0357089	0.826861
Matr3;S598	Q8K310;S598	3.00705	-0.545839	2.13975	0.0381641	0.826861
Mbp;T152	P04370;T152	0.787269	1.16197	2.37057	0.0223731	0.826861
Med22;S173	Q62276;S173	-0.85636	-0.394953	-2.29907	0.0264856	0.826861
Mgea5;S364	Q9EQQ9;S364	0.977819	-1.60984	2.21487	0.0321856	0.826861
Mical3;S1187	Q8CJ19;S1187	1.00881	1.0643	2.04428	0.0471581	0.826861
Mical3;S1716	Q8CJ19;S1716	0.607131	-0.744675	2.1614	0.0363476	0.826861
Mink1;S750	Q9JM52;S750	-0.601917	1.37734	-2.05058	0.0465121	0.826861
Msh4;T261	Q99MT2;T261	-0.947285	-1.11417	-2.28925	0.0271004	0.826861
Myo9a;S2458	Q8C170;S2458	-0.758038	-1.68311	-2.09639	0.0420423	0.826861
Nckipsd;S286	Q9ESJ4;S286	-1.37486	1.59012	-2.21546	0.032142	0.826861
Ndrg2;S350	Q9QYG0;S350	-1.42199	2.60658	-2.05642	0.0459199	0.826861
Nefh;S637	P19246;S637	1.31932	1.17484	2.14424	0.0377805	0.826861
Nmt1;S47	O70310;S47	1.27438	1.32442	2.26988	0.0283502	0.826861
Npepps;S789	Q11011;S789	-0.754184	-1.80689	-2.24991	0.0296927	0.826861
Nucks1;S58	Q80XU3;S58	1.35155	-0.968929	2.11882	0.0399948	0.826861
Numbl;S263	O08919;S263	-1.05163	5.39592	-2.12669	0.039298	0.826861
Otud4;S1017	B2RRE7;S1017	1.02822	0.27932	2.20075	0.0332416	0.826861
Otud7a;S711	Q8R554;S711	-0.617536	-0.0120032	-2.04013	0.0475875	0.826861
Pacs1;S529	Q8K212;S529	2.78616	-0.230931	2.17752	0.0350457	0.826861
Pacsin1;S427	Q61644;S427	0.807546	0.66902	2.12504	0.0394431	0.826861
Palm;T153	Q9Z0P4;T153	1.67356	2.16676	2.22826	0.0312115	0.826861
Pcbp1;S190	P60335;S190	1.09644	-0.889402	2.07296	0.0442796	0.826861
Pclo;S1338	Q9QYX7;S1338	0.721778	-1.40225	2.22216	0.0316519	0.826861
Pclo;S4129	Q9QYX7;S4129	1.08644	-0.740746	2.38902	0.0214097	0.826861
Pde4a;S297	O89084;S297	0.759718	-2.57962	2.2847	0.0273893	0.826861
Pde7a;S74	Q9QXQ1;S74	-0.607453	-2.08009	-2.06216	0.0453446	0.826861
Pdzd8;S532	B9EJ80;S532	-0.779877	-1.21246	-2.33191	0.0245189	0.826861
Pex5l;S202	Q8C437;S202	-0.349589	4.3637	-2.05656	0.0459061	0.826861
Pip5k1a;S443	P70182;S443	0.977123	-0.739802	2.35929	0.022981	0.826861
Pip5k1c;S659	O70161;S659	1.25385	1.34359	2.04065	0.0475329	0.826861
Pitpnm3;S907	Q3UHE1;S907	1.22874	0.704804	2.12338	0.0395896	0.826861
Pkn2;T957	Q8BWW9;T957	-0.793984	-0.296844	-2.06859	0.0447079	0.826861
Plch2;S660	A2AP18;S660	-1.13573	0.0357075	-2.21314	0.0323134	0.826861
Ppapdc2;S24	Q9D4F2;S24	-0.960704	0.203116	-2.04882	0.0466918	0.826861
Ppm1e;S504	Q80TL0;S504	-1.1454	1.47881	-2.19897	0.0333771	0.826861
Ppm1h;S222	Q3UYC0;S222	-1.03368	0.878851	-2.09181	0.0424719	0.826861
Ppme1;S25	Q8BVQ5;S25	-0.923286	-1.17586	-2.16752	0.0358487	0.826861
Prkca;S319	P20444;S319	2.35317	1.71418	2.16473	0.036075	0.826861
Prkci;T563	Q62074;T563	0.916802	-0.978773	2.2547	0.0293655	0.826861
Psd3;T1029	Q2PFD7;T1029	1.64005	0.603419	2.07871	0.0437208	0.826861
Rab11fip2;S270	G3XA57;S270	0.735706	0.900741	2.33398	0.0243997	0.826861
Rabep1;S407	O35551;S407	-0.511306	1.55001	-2.27427	0.0280628	0.826861
Ralgapa1;T753	Q6GYP7;T753	-1.00068	-2.74647	-2.27731	0.0278647	0.826861
Rasgrp1;S693	Q9Z1S3;S693	-0.794345	-1.86021	-2.2987	0.0265081	0.826861
Rbsn;S218	Q80Y56;S218	-1.11052	0.692255	-2.1064	0.0411175	0.826861
Rgs14;S143	P97492;S143	0.992654	-1.39602	2.06454	0.045108	0.826861
Rgs14;S289	P97492;S289	0.98282	3.76966	2.07555	0.0440265	0.826861
Rims1;S740	Q99NE5;S740	1.63274	-1.53825	2.29026	0.0270366	0.826861
Rims2;S525	Q9EQZ7;S525	-0.811118	1.01574	-2.1866	0.0343307	0.826861
Rogdi;S227	Q3TDK6;S227	0.990903	-0.375845	2.04611	0.0469694	0.826861
Scaf4;S154	Q7TSH6;S154	-0.593924	-1.96594	-2.08932	0.0427071	0.826861
Sccpdh;S215	Q8R127;S215	-0.716805	-1.58521	-2.26186	0.028883	0.826861
Scg3;S365	P47867;S365	-0.650565	1.90458	-2.13617	0.0384718	0.826861
Sgip1;S151	Q8VD37;S151	1.83957	-1.58923	2.34071	0.0240152	0.826861
Sgsm3;S406	Q8VCZ6;S406	0.983582	-1.8954	2.05672	0.04589	0.826861
Sh3kbp1;S630	Q8R550;S630	0.844856	-1.18762	2.25949	0.0290418	0.826861
Sipa1l1;S1345	Q8C0T5;S1345	-1.84315	-1.39691	-2.0727	0.0443045	0.826861
Sipa1l1;S1564	Q8C0T5;S1564	-0.676813	2.64182	-2.34819	0.0235939	0.826861
Slc4a7;S57	Q8BTY2;S57	-0.880169	-1.06793	-2.21911	0.0318742	0.826861
Slc7a8;S21	Q9QXW9;S21	-1.15701	4.87126	-2.33142	0.0245474	0.826861
Soga3;S639	Q6NZL0;S639	-0.615222	-0.139602	-2.06204	0.0453562	0.826861
Sorbs1;S576	Q62417;S576	-0.848418	-0.681176	-2.2251	0.031439	0.826861
Sos1;S1120	Q62245;S1120	-0.686356	-1.25215	-2.27254	0.0281753	0.826861
Spag9;S733	Q58A65;S733	-0.98949	0.370557	-2.11913	0.0399674	0.826861
Sptan1;S1190	P16546;S1190	1.54809	1.18705	2.20573	0.0328658	0.826861
Sptbn1;T2186	Q62261;T2186	-0.778722	-0.890204	-2.34774	0.023619	0.826861
Srrm2;S323	Q8BTI8;S323	-1.68911	2.52553	-2.39	0.0213593	0.826861
Srrm2;T1448	Q8BTI8;T1448	1.62403	-0.25644	2.28464	0.0273934	0.826861
Srrm2;T2056	Q8BTI8;T2056	1.16896	-0.0666359	2.0416	0.0474351	0.826861
Srsf2;S26	Q62093;S26	-0.62729	1.26699	-2.09971	0.0417339	0.826861
Stk39;T364	Q9Z1W9;T364	-1.07128	0.612321	-2.0951	0.0421632	0.826861
Strn3;S257	Q9ERG2;S257	1.34952	1.25424	2.17212	0.0354774	0.826861
Sv2a;S81	Q9JIS5;S81	2.85888	0.750978	2.09096	0.0425523	0.826861
Svil;S960	Q8K4L3;S960	-0.882992	-0.482197	-2.34056	0.0240233	0.826861
Syngap1;S895	F6SEU4;S895	1.13016	-1.6245	2.29923	0.0264757	0.826861
Tanc1;S310	Q0VGY8;S310	0.785731	0.499981	2.2151	0.0321684	0.826861
Tbc1d24;S482	Q3UUG6;S482	-0.664914	3.2819	-2.26061	0.0289668	0.826861
Tenm2;T346	Q9WTS5;T346	-0.915703	-0.375991	-2.15516	0.0368629	0.826861
Tjp1;T1423	P39447;T1423	-1.11097	-0.849713	-2.2537	0.0294335	0.826861
Tmcc3;S216	Q8R310;S216	-0.852685	-0.283006	-2.38474	0.0216295	0.826861
Tnik;S541	P83510;S541	-1.55587	-1.88206	-2.18783	0.0342342	0.826861
Tnks1bp1;S429	P58871;S429	-0.76765	0.522747	-2.33135	0.0245513	0.826861
Tnks1bp1;S602	P58871;S602	-0.687694	1.94505	-2.24742	0.029864	0.826861
Tp53bp1;S1115	P70399;S1115	-0.638485	-2.53944	-2.26741	0.0285133	0.826861
Tp53bp1;S268	P70399;S268	0.923429	1.75403	2.13646	0.0384469	0.826861
Tpd52l2;S12	Q9CYZ2;S12	1.03279	1.53675	2.15382	0.0369746	0.826861
Tpd52l2;S206	Q9CYZ2;S206	1.0143	-1.13183	2.05888	0.0456728	0.826861
Trim28;S51	Q62318;S51	-0.848371	3.46291	-2.32537	0.0249002	0.826861
Trio;S2458	Q0KL02;S2458	1.05813	0.413909	2.22213	0.031654	0.826861
Ttc9b;S114	Q9D6E4;S114	-0.838042	0.161222	-2.39351	0.021181	0.826861
Ttll12;S11	Q3UDE2;S11	-0.862339	0.629621	-2.19286	0.0338447	0.826861
Tubb2a;T312	Q7TMM9;T312	1.03281	-3.01277	2.10292	0.0414372	0.826861
Tubb4b;Y340	P68372;Y340	-0.661407	-2.54209	-2.20026	0.0332787	0.826861
Unc80;S3048	Q8BLN6;S3048	1.05467	-1.86496	2.09794	0.0418982	0.826861
Wfs1;S32	P56695;S32	-0.687228	3.50526	-2.12715	0.0392569	0.826861
Zdhhc5;S694	Q8VDZ4;S694	-0.708072	1.69962	-2.22431	0.0314961	0.826861
Ckap2l;T414	Q7TS74;T414	-1.13698	0.516137	-2.03731	0.0478819	0.829761
Purb;S6	O35295;S6	0.994894	1.64921	2.0363	0.0479873	0.829761
Prkar2b;S112	P31324;S112	-0.422385	5.38142	-2.03333	0.0482985	0.831108
Sybu;S549	Q8BHS8;S549	0.584521	-2.70364	2.03336	0.0482955	0.831108
Lphn1;S1439	Q80TR1;S1439	-1.08524	0.277806	-2.02911	0.0487448	0.83377
Pnpo;T238	Q91XF0;T238	-0.775872	-0.92867	-2.02879	0.0487794	0.83377
Srcin1;S79	Q9QWI6;S79	-0.65099	4.00276	-2.02855	0.0488043	0.83377
Arhgap1;S27	Q5FWK3;S27	1.30557	-0.0424573	2.01162	0.050633	0.834123
Atg14;T11	Q8CDJ3;T11	-0.578364	-1.59083	-2.022	0.0495047	0.834123
Braf;S766	P28028;S766	1.87749	1.66316	2.01325	0.0504545	0.834123
Cadps2;S61	Q8BYR5;S61	-0.781133	0.902217	-2.02666	0.0490057	0.834123
Eif3j1;T114	Q66JS6;T114	-0.705194	-1.54071	-2.02601	0.0490754	0.834123
Fbxl20;T417	Q9CZV8;T417	-0.984757	-0.306326	-2.01102	0.0506984	0.834123
Hcn2;S840	O88703;S840	-0.658433	0.924791	-2.01422	0.0503483	0.834123
Kcnq2;S352	Q9Z351;S352	-0.610519	-2.00609	-2.01568	0.0501895	0.834123
Mcrs1;T103	Q99L90;T103	0.92313	0.171019	2.01579	0.0501771	0.834123
Pclo;S3616	Q9QYX7;S3616	-0.582841	2.1275	-2.0182	0.0499154	0.834123
Serbp1;S202	Q9CY58;S202	0.587415	-0.505642	2.01196	0.0505959	0.834123
Shank1;S1263	D3YZU1;S1263	-1.03582	0.169234	-2.01785	0.0499536	0.834123
Sorbs2;S315	Q3UTJ2;S315	-0.79173	-0.381408	-2.01366	0.0504098	0.834123
Sptbn1;S2318	Q62261;S2318	1.18562	1.64633	2.01832	0.0499027	0.834123
Tubb6;T312	Q9ERD7;T312	0.667445	-4.21456	2.01911	0.0498169	0.834123
Ubap1;S146	Q8BH48;S146	0.922959	-1.06395	2.02167	0.0495404	0.834123
Cep170b;S1101	Q80U49;S1101	-1.37037	2.15433	-2.00523	0.0513386	0.838845
Opalin;S84	Q7M750;S84	-1.1894	2.80129	-2.00627	0.0512232	0.838845
Sacs;S1781	Q9JLC8;S1781	0.848735	-1.31551	2.00604	0.0512485	0.838845
Basp1;S192	Q91XV3;S192	1.02125	1.11131	1.99727	0.0522288	0.840483
Cep170b;S421	Q80U49;S421	-0.606576	0.827513	-2.00156	0.051747	0.840483
Madd;T1060	Q80U28;T1060	-0.741633	-0.11416	-2.00147	0.0517576	0.840483
Pde4a;S13	O89084;S13	-0.665568	-0.400239	-2.00092	0.0518183	0.840483
Sh2d5;S421	Q8JZW5;S421	-0.646325	1.02463	-1.99695	0.0522647	0.840483
Vps35;S783	Q9EQH3;S783	1.04025	1.95368	2.00008	0.051913	0.840483
Wdr81;S1570	Q5ND34;S1570	1.03867	-1.79417	1.99755	0.0521977	0.840483
Stxbp5;S783	Q8K400;S783	0.971056	-0.933994	1.99535	0.0524457	0.841494
Ap3d1;S760	O54774;S760	-0.574188	2.48987	-1.99229	0.0527931	0.845165
Nucks1;S181	Q80XU3;S181	1.46964	1.48964	1.98869	0.0532041	0.848905
Ptprn2;S422	P80560;S422	-1.93994	0.327964	-1.98815	0.0532651	0.848905
Micall1;S481	Q8BGT6;S481	0.988993	-3.23087	1.98656	0.0534478	0.849915
Epn1;S419	Q80VP1;S419	0.958442	-0.795869	1.98014	0.0541906	0.852216
Ildr2;S511	B5TVM2;S511	-0.738644	1.04519	-1.98034	0.0541677	0.852216
Ndrg3;T332	Q9QYF9;T332	1.21245	-0.715037	1.98314	0.0538423	0.852216
Ppm1h;S220	Q3UYC0;S220	1.01629	0.258821	1.98171	0.0540085	0.852216
Rph3a;S271	P47708;S271	-0.858489	3.51702	-1.98307	0.0538502	0.852216
Camk2a;S470	P11798;S470	-0.654493	-2.43877	-1.97304	0.0550227	0.853991
G3bp2;S225	P97379;S225	-0.910859	0.530794	-1.97448	0.0548526	0.853991
Myh10;S1939	Q61879;S1939	-1.33788	2.6227	-1.97534	0.0547516	0.853991
Plec;S4389	Q9QXS1;S4389	-0.60024	-1.84388	-1.97677	0.0545844	0.853991
Rplp0;S307	P14869;S307	1.93716	0.162674	1.97387	0.054925	0.853991
Uvssa;S15	Q9D479;S15	1.25581	2.80797	1.97559	0.0547228	0.853991
Arhgap23;S351	Q69ZH9;S351	1.54514	0.250712	1.96669	0.0557756	0.862759
Gfap;T147	P03995;T147	-0.61859	-2.41505	-1.96623	0.0558298	0.862759
Anln;S656	Q8K298;S656	1.63748	-0.36022	1.96388	0.0561116	0.865236
Grm7;S900	Q68ED2;S900	-0.474478	1.79726	-1.96074	0.0564889	0.869173
Rplp0;S304	P14869;S304	1.93578	0.145615	1.95898	0.0567022	0.870574
4932418E24Rik;T3	Q8C5V8;T3	-0.570729	-1.88252	-1.88373	0.0664602	0.872878
Abcf1;S138	Q6P542;S138	0.811913	0.0503177	1.87445	0.0677571	0.872878
Add1;S586	Q9QYC0;S586	1.24491	0.590483	1.88536	0.0662344	0.872878
Agap2;S149	Q3UHD9;S149	-1.28037	-1.6281	-1.87879	0.0671474	0.872878
Akap5;S79	D3YVF0;S79	-0.65076	0.551642	-1.9217	0.0613705	0.872878
Anapc4;S779	Q91W96;S779	0.696479	-0.106497	1.94296	0.0586684	0.872878
Arhgef19;T567	Q8BWA8;T567	-0.842168	1.57047	-1.90631	0.0633908	0.872878
Arl3;S5	Q9WUL7;S5	-0.889511	-2.74735	-1.93395	0.059801	0.872878
Asap1;T1066	Q9QWY8;T1066	1.05843	-0.944853	1.93207	0.0600395	0.872878
Basp1;T31	Q91XV3;T31	-1.75375	4.37681	-1.87905	0.0671118	0.872878
Bin1;S304	O08539;S304	0.761066	2.90457	1.87606	0.0675309	0.872878
Braf;S348	P28028;S348	-0.856754	-1.50944	-1.9123	0.0625986	0.872878
Bsn;S1493	O88737;S1493	-1.07879	1.25477	-1.88498	0.0662868	0.872878
Cacna1a;T1092	P97445;T1092	-0.932388	0.277387	-1.89599	0.0647783	0.872878
Cacna1b;S2188	O55017;S2188	-0.798844	-0.250326	-1.93144	0.0601194	0.872878
Camk2a;T336	P11798;T336	1.7689	1.60773	1.8753	0.0676381	0.872878
Caskin1;S708	Q6P9K8;S708	-0.777823	-1.81926	-1.94804	0.0580395	0.872878
Cep170b;S478	Q80U49;S478	-0.681546	0.0467525	-1.87809	0.0672461	0.872878
Col4a3bp;S377	Q9EQG9;S377	-1.14795	-1.92724	-1.92165	0.0613772	0.872878
Coro7;S912	Q9D2V7;S912	0.642593	-0.772215	1.88021	0.0669497	0.872878
Ctnnd2;S357	O35927;S357	-0.830438	0.637826	-1.90876	0.0630653	0.872878
Dmxl2;S1144	Q8BPN8;S1144	1.49718	-0.391613	1.8983	0.0644662	0.872878
Dmxl2;S1399	Q8BPN8;S1399	2.18837	2.40133	1.95032	0.0577582	0.872878
Eif4b;S445	Q8BGD9;S445	-0.538947	2.65749	-1.91811	0.0618363	0.872878
Epb41l1;T79	Q9Z2H5;T79	0.874158	-1.07713	1.87479	0.0677088	0.872878
Evl;S329	P70429;S329	-0.696604	1.51554	-1.92532	0.0609023	0.872878
Fam126b;T308	Q8C729;T308	-0.721296	-1.24027	-1.92277	0.0612314	0.872878
Fmnl1;T509	Q9JL26;T509	-0.669047	-1.90582	-1.90286	0.0638526	0.872878
Fmnl2;S171	A2APV2;S171	1.36955	0.771309	1.9357	0.05958	0.872878
Garnl3;S655	Q3V0G7;S655	0.659553	-0.934358	1.94532	0.0583759	0.872878
Gigyf2;S26	Q6Y7W8;S26	-0.660219	1.16846	-1.91637	0.0620645	0.872878
Grin2b;S1058	Q01097;S1058	0.893453	0.412817	1.88432	0.0663786	0.872878
Hivep2;S1042	Q3UHF7;S1042	-0.610733	-0.0379368	-1.92021	0.0615634	0.872878
Ilf3;S382	Q9Z1X4;S382	1.73635	-3.28926	1.92082	0.0614844	0.872878
Irf2bpl;S638	Q8K3X4;S638	-0.826547	-0.304778	-1.90709	0.0632879	0.872878
Itsn2;S110	Q9Z0R6;S110	0.845187	-1.80945	1.94917	0.0579002	0.872878
Kif21b;S1150	Q9QXL1;S1150	-0.814009	-1.99609	-1.87597	0.0675435	0.872878
Lifr;S922	P42703;S922	-0.516535	-1.05921	-1.92066	0.0615043	0.872878
Lima1;S225	Q9ERG0;S225	-0.77738	-0.0305717	-1.91887	0.0617377	0.872878
Lysmd1;S99	Q9D0E3;S99	-0.788404	-0.140953	-1.89454	0.0649754	0.872878
Map1a;S750	Q9QYR6;S750	-2.4544	4.38957	-1.93049	0.0602405	0.872878
Map1a;T2031	Q9QYR6;T2031	0.945744	0.304092	1.91528	0.0622064	0.872878
Map4k2;S394	Q61161;S394	1.4033	-0.612972	1.92961	0.0603532	0.872878
Mark1;S382	Q8VHJ5;S382	-0.636096	-0.752725	-1.90292	0.0638445	0.872878
Mia2;S1190	Q91ZV0;S1190	-0.593404	-1.67438	-1.88118	0.0668147	0.872878
Mllt4;S1173	Q9QZQ1;S1173	-0.669884	0.485301	-1.92476	0.0609753	0.872878
Ncdn;S409	Q9Z0E0;S409	-0.575398	-1.33308	-1.90988	0.062918	0.872878
Nf1;S2804	Q04690;S2804	-0.756471	-0.753538	-1.91048	0.0628385	0.872878
Nr2c2;T352	P49117;T352	-0.505457	-2.7483	-1.95397	0.0573104	0.872878
Numb;T438	Q9QZS3;T438	-0.776312	-0.744707	-1.87804	0.0672534	0.872878
Osbpl6;S35	Q8BXR9;S35	0.726088	-0.96106	1.89694	0.0646499	0.872878
Otud4;S1016	B2RRE7;S1016	0.933335	0.262438	1.95008	0.0577879	0.872878
Phactr3;S277	Q8BYK5;S277	-0.661877	-1.03205	-1.95599	0.0570641	0.872878
Plcd1;S460	Q8R3B1;S460	0.873213	-1.01459	1.94835	0.0580008	0.872878
Plcl1;S78	Q3USB7;S78	1.39364	0.888371	1.94095	0.0589194	0.872878
Ppfia2;S163	Q8BSS9;S163	-0.556755	0.28668	-1.93803	0.0592858	0.872878
Prrt3;S895	Q6PE13;S895	0.823689	1.8936	1.87489	0.0676946	0.872878
Rabl6;T383	Q5U3K5;T383	1.01967	-2.50477	1.91508	0.0622331	0.872878
Rap1gap;S499	A2ALS5;S499	-0.95637	0.553511	-1.92234	0.0612879	0.872878
Rltpr;S1281	Q3V3V9;S1281	-0.9799	1.4046	-1.90943	0.0629773	0.872878
Rufy3;S49	Q9D394;S49	-2.18773	-0.594814	-1.89221	0.0652932	0.872878
Sbf1;T1819	Q6ZPE2;T1819	0.830996	-3.11815	1.91148	0.0627064	0.872878
Sec22b;S137	O08547;S137	1.22992	0.499039	1.93989	0.0590523	0.872878
Sept7;T331	O55131;T331	0.717111	-1.49826	1.91496	0.0622486	0.872878
Sept8;S20	Q8CHH9;S20	1.00271	-2.02953	1.94641	0.0582405	0.872878
Sgip1;S156	Q8VD37;S156	-0.655705	2.52832	-1.9467	0.0582051	0.872878
Sgip1;T263	Q8VD37;T263	-1.15461	2.05766	-1.92433	0.0610298	0.872878
Sgta;T82	Q8BJU0;T82	-0.35901	4.09279	-1.90746	0.0632386	0.872878
Slc3a2;S58	P10852;S58	-1.35586	-1.98376	-1.88113	0.0668213	0.872878
Slc9a3r1;S264	P70441;S264	-0.746248	0.461262	-1.92771	0.0605959	0.872878
Slc9a3r1;S297	P70441;S297	0.869774	1.84134	1.87918	0.0670933	0.872878
Sorbs2;S339	Q3UTJ2;S339	-0.690368	-0.89402	-1.92535	0.0608984	0.872878
Speg;S2135	Q62407;S2135	-0.637159	0.574346	-1.8951	0.0648997	0.872878
Sptbn1;S2339	Q62261;S2339	-2.63659	4.75025	-1.93107	0.0601662	0.872878
Srcin1;S574	Q9QWI6;S574	2.28387	-2.4949	1.91783	0.0618729	0.872878
Srgap3;S874	Q812A2;S874	-1.67648	3.23842	-1.88195	0.0667072	0.872878
Srrm1;S635	Q52KI8;S635	1.21019	-0.0742211	1.88866	0.0657795	0.872878
Srsf1;S201	Q6PDM2;S201	0.985236	1.50005	1.87764	0.0673093	0.872878
Strip2;S331	Q8C9H6;S331	-0.683242	-0.792572	-1.87491	0.0676925	0.872878
Suco;S1222	Q8C341;S1222	1.03986	-3.46415	1.93181	0.0600732	0.872878
Syn1;S666	O88935;S666	-0.621305	5.58645	-1.93999	0.05904	0.872878
Syngap1;S780	F6SEU4;S780	1.85142	0.275692	1.88698	0.0660112	0.872878
Syt11;S133	Q9R0N3;S133	-0.699667	-1.46234	-1.88018	0.0669542	0.872878
Tanc1;S267	Q0VGY8;S267	-0.444391	0.971763	-1.91561	0.0621628	0.872878
Tppp;S158	Q7TQD2;S158	2.0068	0.851616	1.95215	0.0575336	0.872878
Tspyl4;S87	Q8VD63;S87	0.800169	1.12423	1.88649	0.0660778	0.872878
Uvssa;T14	Q9D479;T14	1.21638	2.79969	1.89721	0.0646131	0.872878
Vcpip1;S746	Q8CDG3;S746	0.86608	-0.473284	1.89855	0.0644322	0.872878
Vgf;S423	Q0VGU4;S423	-0.759032	1.04707	-1.88749	0.0659403	0.872878
Map1a;S460	Q9QYR6;S460	-0.569161	2.65251	-1.87198	0.0681061	0.874212
Pclo;S131	Q9QYX7;S131	-1.27526	0.0693128	-1.87285	0.0679837	0.874212
Nefh;S795	P19246;S795	0.737093	1.15897	1.87062	0.0682987	0.875107
Adcy9;S610	P51830;S610	-1.7906	2.56452	-1.86237	0.0694778	0.87685
Ampd3;S85	O08739;S85	-0.611632	0.0803169	-1.86726	0.0687775	0.87685
Ank2;S1703	Q8C8R3;S1703	1.46628	0.712591	1.86818	0.0686454	0.87685
Atg2b;S1017	Q80XK6;S1017	0.840176	-0.808871	1.86285	0.0694089	0.87685
Dpysl3;T519	Q62188;T519	1.86701	0.556429	1.86591	0.0689698	0.87685
Hspb8;S87	Q9JK92;S87	-0.69336	-1.38134	-1.86057	0.0697375	0.87685
Hspbp1;S349	Q99P31;S349	0.697151	-0.701225	1.86022	0.0697886	0.87685
Map1s;S573	Q8C052;S573	0.945057	0.495016	1.86035	0.0697695	0.87685
Ralgapb;S414	Q8BQZ4;S414	-0.839896	0.313642	-1.86533	0.0690528	0.87685
Shisa7;S455	Q8C3Q5;S455	-0.861343	-1.01499	-1.86628	0.0689177	0.87685
Thumpd1;S86	Q99J36;S86	1.76532	2.6983	1.86044	0.0697566	0.87685
Atl1;S23	Q8BH66;S23	0.932156	0.0747178	1.85869	0.0700104	0.878089
Nckipsd;S260	Q9ESJ4;S260	-0.842932	2.14626	-1.85686	0.0702758	0.878753
Thumpd1;S88	Q99J36;S88	1.77658	2.68064	1.85662	0.0703101	0.878753
Add1;S423	Q9QYC0;S423	-1.63558	0.866518	-1.84673	0.0717616	0.882471
Arhgap31;S1093	A6X8Z5;S1093	0.851528	-2.60172	1.85185	0.0710077	0.882471
Bcas3;S706	Q8CCN5;S706	-0.614524	0.730129	-1.84775	0.0716106	0.882471
Dlgap1;S389	Q9D415;S389	-0.715195	1.46679	-1.8478	0.0716034	0.882471
Itsn1;S971	Q9Z0R4;S971	-0.390432	2.84763	-1.84782	0.0716003	0.882471
Mpdz;S1066	Q8VBX6;S1066	-0.570794	-1.26161	-1.85251	0.0709109	0.882471
Shf;S39	Q8CG80;S39	1.10883	1.64047	1.84616	0.0718463	0.882471
Sorbs1;S62	Q62417;S62	-0.921235	2.90028	-1.84846	0.0715064	0.882471
Sort1;S819	Q6PHU5;S819	1.16072	1.85266	1.84946	0.0713579	0.882471
Top2b;S1453	Q64511;S1453	1.04664	0.0494035	1.85153	0.0710542	0.882471
Tnks1bp1;S692	P58871;S692	-0.52099	1.13163	-1.84515	0.0719956	0.882782
Pacs1;S517	Q8K212;S517	0.893937	3.18407	1.84368	0.0722146	0.883947
Cdk12;S640	Q14AX6;S640	-0.556181	-3.34371	-1.84039	0.0727049	0.885824
Dock1;S1858	Q8BUR4;S1858	-0.622459	-0.939312	-1.84015	0.072741	0.885824
Rtn3;S233	Q9ES97;S233	1.6898	1.96462	1.84021	0.0727326	0.885824
Amph;S541	Q7TQF7;S541	-1.31092	2.85794	-1.80658	0.0779163	0.886567
Ap2a1;S652	P17426;S652	1.59	0.906854	1.80825	0.0776525	0.886567
Atg2b;S1015	Q80XK6;S1015	0.905006	-0.532489	1.83271	0.073863	0.886567
Atp2b2;S1156	Q9R0K7;S1156	-1.21513	2.21022	-1.82232	0.0754528	0.886567
Bcr;S461	Q6PAJ1;S461	-0.740997	2.28272	-1.82701	0.0747305	0.886567
Cables2;S103	Q8K3M5;S103	0.855781	-0.212942	1.82506	0.0750307	0.886567
Cacng8;S357	Q8VHW2;S357	-0.793786	0.0371299	-1.80587	0.0780288	0.886567
Dgkb;S95	Q6NS52;S95	1.79693	1.4478	1.81419	0.0767162	0.886567
Dock4;T1911	P59764;T1911	-0.593975	-2.30931	-1.8312	0.0740911	0.886567
Dtx3l;S9	Q3UIR3;S9	-0.766302	-2.86654	-1.81781	0.076152	0.886567
Eif4g1;S1189	Q6NZJ6;S1189	0.706155	0.154657	1.80748	0.0777736	0.886567
Fam117b;S131	Q3U3E2;S131	1.14586	-1.3691	1.82605	0.0748776	0.886567
Fam21;S747	Q6PGL7;S747	-0.471481	1.79926	-1.83397	0.0736722	0.886567
Farp1;S433	F8VPU2;S433	-1.07614	2.2605	-1.80746	0.077777	0.886567
Hspa4;S76	Q61316;S76	0.524788	-2.89483	1.82801	0.0745785	0.886567
Htr2a;S298	P35363;S298	0.967391	-2.09615	1.82129	0.075612	0.886567
Larp1;S525	Q6ZQ58;S525	0.698579	0.714405	1.82152	0.0755758	0.886567
Macf1;S4483	Q9QXZ0;S4483	-0.616407	-1.37057	-1.81357	0.0768144	0.886567
Mef2a;S253	Q60929;S253	-0.907601	-0.579789	-1.82483	0.0750656	0.886567
Ncoa3;S847	O09000;S847	-0.585183	-2.51429	-1.81377	0.0767833	0.886567
Nhsl1;S1482	Q8CAF4;S1482	-0.629031	-2.41445	-1.81157	0.0771275	0.886567
Pacsin1;S2	Q61644;S2	0.657783	-2.3231	1.82236	0.0754465	0.886567
Pclo;S1642	Q9QYX7;S1642	1.11158	-0.570492	1.83294	0.0738269	0.886567
Peak1;S877	Q69Z38;S877	-0.827949	-1.1634	-1.8064	0.0779455	0.886567
Phactr1;S467	Q2M3X8;S467	-0.857915	0.0780881	-1.82073	0.0756984	0.886567
Plek;S117	Q9JHK5;S117	-0.930834	-2.14396	-1.83539	0.0734574	0.886567
Prkar2b;S83	P31324;S83	1.16896	1.13247	1.82355	0.0752625	0.886567
Prkg2;S110	Q61410;S110	1.01857	-0.80199	1.80864	0.0775909	0.886567
Rap1gap;S498	A2ALS5;S498	-0.953382	0.463922	-1.81327	0.0768617	0.886567
Rap1gap;T522	A2ALS5;T522	1.50822	-0.059887	1.80874	0.0775747	0.886567
Rims1;S790	Q99NE5;S790	1.7757	-1.93942	1.81469	0.0766378	0.886567
Shisa7;T532	Q8C3Q5;T532	-0.858555	3.96167	-1.82872	0.0744689	0.886567
Srpk1;S450	O70551;S450	0.580596	-1.25265	1.83585	0.0733873	0.886567
Sugp2;S740	Q8CH09;S740	-0.866893	0.858325	-1.82735	0.0746788	0.886567
Taf12;S51	Q8VE65;S51	-0.719883	0.237716	-1.8133	0.076857	0.886567
Tbc1d5;S563	Q80XQ2;S563	0.67449	-1.41023	1.83317	0.0737929	0.886567
Thrap3;S559	Q569Z6;S559	0.849511	-1.35512	1.80601	0.0780064	0.886567
Tom1;S462	O88746;S462	-0.477981	1.69038	-1.81723	0.0762416	0.886567
Ttc7b;T305	E9Q6P5;T305	-0.587457	-2.33045	-1.81958	0.0758766	0.886567
Uba1;S876	Q02053;S876	-0.559888	-0.355426	-1.82638	0.0748284	0.886567
Vdac2;S116	Q60930;S116	0.746973	-2.25592	1.80597	0.0780134	0.886567
Zc2hc1a;T243	Q8BJH1;T243	0.670988	-0.0680831	1.83799	0.0730653	0.886567
Necap2;T180	Q9D1J1;T180	-0.661517	-1.47274	-1.80383	0.0783534	0.888836
Arfgef3;S2074	Q3UGY8;S2074	-0.967174	0.199212	-1.80246	0.0785727	0.888903
Pclo;S75	Q9QYX7;S75	0.746711	0.66627	1.80195	0.078654	0.888903
Stxbp5l;S792	Q5DQR4;S792	-0.600443	-1.8539	-1.80145	0.0787335	0.888903
Gfap;S12	P03995;S12	-0.904103	1.46513	-1.80018	0.0789376	0.889797
Bcan;S414	Q61361;S414	-1.17264	0.428543	-1.79836	0.0792299	0.89168
Atp1a3;S712	Q6PIC6;S712	0.436267	0.429506	1.79422	0.0798988	0.893305
Cep170b;S709	Q80U49;S709	-0.610495	-1.48314	-1.79152	0.0803365	0.893305
Epn1;S453	Q80VP1;S453	0.86375	1.81411	1.78673	0.0811212	0.893305
Fam53c;S122	Q8BXQ8;S122	0.627063	-2.55996	1.78618	0.081211	0.893305
Gpr162;S539	Q3UN16;S539	0.613999	-0.722619	1.79237	0.0801989	0.893305
Map1s;S569	Q8C052;S569	0.841294	0.656945	1.79416	0.0799083	0.893305
Map6;S632	Q7TSJ2;S632	0.622449	0.372194	1.78736	0.0810177	0.893305
Marcksl1;T85	P28667;T85	-0.761067	1.48416	-1.79151	0.0803392	0.893305
Pacsin1;S4	Q61644;S4	0.639278	-2.32528	1.78591	0.0812551	0.893305
Peak1;S282	Q69Z38;S282	0.859282	-0.358997	1.79007	0.080574	0.893305
Purg;S163	Q8R4E6;S163	0.752869	3.25065	1.78738	0.0810144	0.893305
Radil;S432	Q69Z89;S432	-0.687766	-3.0657	-1.79006	0.0805755	0.893305
Ralgapa1;S796	Q6GYP7;S796	0.817432	-1.61241	1.78942	0.0806792	0.893305
Son;S1723	Q9QX47;S1723	-0.482113	-1.64984	-1.7904	0.0805193	0.893305
Sv2a;S80	Q9JIS5;S80	2.50868	0.598863	1.79457	0.0798426	0.893305
Sema4d;S832	O09126;S832	-0.54266	-0.0776595	-1.78442	0.0815006	0.894623
Limch1;S231	Q3UH68;S231	0.628361	1.36203	1.78294	0.0817438	0.895912
Acss2;S30	Q9QXG4;S30	-1.0838	-0.667208	-1.78192	0.0819135	0.896393
Dmtn;S303	Q9WV69;S303	-0.89309	1.18508	-1.77932	0.0823451	0.896983
Shank1;S638	D3YZU1;S638	0.825354	-0.610029	1.77998	0.0822351	0.896983
Sipa1l1;S1544	Q8C0T5;S1544	-1.05738	0.381502	-1.78004	0.0822247	0.896983
Add2;S656	Q9QYB8;S656	-0.607691	0.529156	-1.77597	0.0829032	0.897303
Bsn;S2029	O88737;S2029	-0.570161	1.59166	-1.77745	0.0826558	0.897303
Gabbr2;S919	Q80T41;S919	1.52383	0.68466	1.77461	0.0831302	0.897303
Kcnb1;S611	Q03717;S611	-0.627248	-2.13256	-1.77731	0.0826794	0.897303
Rnmt;S64	Q9D0L8;S64	-0.608126	-0.0980566	-1.77523	0.0830259	0.897303
Slc26a6;S751	Q8CIW6;S751	0.69378	0.0719998	1.77477	0.0831041	0.897303
Nckipsd;S147	Q9ESJ4;S147	-0.712584	2.16386	-1.77331	0.0833491	0.898304
Ablim2;S334	Q8BL65;S334	-0.5838	-0.490078	-1.75219	0.0869587	0.899002
Arhgef19;S574	Q8BWA8;S574	-0.743007	1.5908	-1.75962	0.0856748	0.899002
Camsap3;S586	Q80VC9;S586	1.01723	1.51591	1.7626	0.0851639	0.899002
Cdk18;S109	Q04899;S109	-0.369065	2.16761	-1.76188	0.0852868	0.899002
Ckb;T262	Q04447;T262	0.680131	-3.4522	1.75082	0.0871981	0.899002
Clec2l;S47	P0C7M9;S47	-0.522071	-1.30308	-1.75579	0.0863342	0.899002
Crebbp;S2064	P45481;S2064	-0.971691	-3.80084	-1.76066	0.085496	0.899002
Ctnna2;S47	Q61301;S47	1.04435	-1.89229	1.75544	0.0863949	0.899002
Dennd1a;S473	Q8K382;S473	0.592367	-0.279009	1.75645	0.0862201	0.899002
Dmtn;S289	Q9WV69;S289	-0.831289	3.40212	-1.75664	0.0861871	0.899002
Elfn1;S675	Q8C8T7;S675	0.927783	-1.99629	1.77057	0.0838095	0.899002
Gprin1;S53	Q3UNH4;S53	-0.638015	1.15077	-1.75703	0.0861205	0.899002
Gtpbp1;S44	O08582;S44	0.903478	0.268942	1.75313	0.0867951	0.899002
Hivep2;S1023	Q3UHF7;S1023	0.651029	-0.661752	1.75902	0.0857772	0.899002
Map2k2;T395	Q63932;T395	1.86992	0.0349526	1.77117	0.0837081	0.899002
Map7d1;S496	A2AJI0;S496	-0.903467	-0.131904	-1.7572	0.0860903	0.899002
Mpp1;S57	P70290;S57	0.802304	0.122608	1.76592	0.0845975	0.899002
Mtmr6;S557	Q8VE11;S557	-0.608236	-0.918741	-1.76947	0.083995	0.899002
Otud7b;S449	B2RUR8;S449	-0.671504	-1.57595	-1.75836	0.0858914	0.899002
Prkacb;S339	P68181;S339	-0.588599	-1.59292	-1.75168	0.0870485	0.899002
Prkce;S316	P16054;S316	-1.3494	-0.970165	-1.76324	0.0850537	0.899002
Reps2;S32	Q80XA6;S32	-0.657334	-1.94917	-1.76968	0.08396	0.899002
Rplp2;S105	P99027;S105	1.88819	0.0712101	1.75908	0.085767	0.899002
Sash1;S435	P59808;S435	-0.588022	-1.62006	-1.76163	0.0853286	0.899002
Shank1;S1291	D3YZU1;S1291	-0.859841	1.62426	-1.74936	0.087452	0.899002
Shisa7;S317	Q8C3Q5;S317	-0.784818	-1.12652	-1.75814	0.0859286	0.899002
Slc1a2;S498	P43006;S498	0.706132	-1.21724	1.75334	0.0867584	0.899002
Srcin1;S399	Q9QWI6;S399	-0.906219	1.41623	-1.74979	0.0873781	0.899002
Srrm2;S2404	Q8BTI8;S2404	-0.524232	-1.77692	-1.76753	0.0843239	0.899002
Tanc2;S1744	A2A690;S1744	-1.25517	-0.11574	-1.75785	0.0859782	0.899002
Tppp;S19	Q7TQD2;S19	0.759945	4.8334	1.75423	0.086605	0.899002
Uba1;S835	Q02053;S835	-0.540472	2.26558	-1.75068	0.0872216	0.899002
Dpysl3;S541	Q62188;S541	0.782139	1.12834	1.74835	0.08763	0.899533
Ppip5k1;S1068	A2ARP1;S1068	-0.525585	-2.46698	-1.74709	0.0878507	0.900501
Aak1;S21	Q3UHJ0;S21	-0.812993	1.37486	-1.70405	0.0956788	0.900669
Abi1;S231	Q8CBW3;S231	2.0871	-0.628366	1.68563	0.0992011	0.900669
Add1;S600	Q9QYC0;S600	-0.640611	3.74114	-1.71971	0.0927655	0.900669
Add1;S605	Q9QYC0;S605	-1.87984	-0.117885	-1.71688	0.0932865	0.900669
Add2;S602	Q9QYB8;S602	0.542518	3.43143	1.71034	0.0945	0.900669
Ak5;S105	Q920P5;S105	-0.838195	3.11321	-1.68657	0.0990201	0.900669
Akt1s1;S92	Q9D1F4;S92	-0.524689	2.05114	-1.70662	0.095195	0.900669
Akt3;S34	Q9WUA6;S34	-0.53192	-2.77707	-1.70631	0.0952547	0.900669
Ano3;S36	A2AHL1;S36	-0.452319	-1.39695	-1.69086	0.0981903	0.900669
Arfgef1;S1550	G3X9K3;S1550	-0.655634	1.60145	-1.68512	0.0993018	0.900669
Arglu1;S264	Q3UL36;S264	-0.702862	-2.24281	-1.70292	0.0958923	0.900669
Arhgef1;S905	Q61210;S905	0.660897	-2.81721	1.73972	0.0891519	0.900669
Arhgef25;S529	Q9CWR0;S529	-0.650145	-1.29856	-1.70819	0.0949006	0.900669
Atg2a;S1290	Q6P4T0;S1290	0.617319	-1.89931	1.68963	0.0984271	0.900669
Atp8a1;T28	P70704;T28	0.835947	0.249371	1.73654	0.0897184	0.900669
Bsn;S865	O88737;S865	-0.657373	-1.99594	-1.73027	0.0908434	0.900669
Cacng3;S248	Q9JJV5;S248	0.835619	-0.700674	1.71135	0.0943113	0.900669
Caskin1;S358	Q6P9K8;S358	0.689329	-0.738572	1.71976	0.0927572	0.900669
Cdk11b;S578	P24788;S578	0.530397	-2.12392	1.68475	0.099372	0.900669
Cdkl5;S407	Q3UTQ8;S407	-0.45082	-0.411815	-1.74053	0.0890076	0.900669
Cep170b;S882	Q80U49;S882	-0.837533	0.159737	-1.70175	0.0961126	0.900669
Chgb;S493	P16014;S493	-0.726632	3.13174	-1.69511	0.0973764	0.900669
Cstf2;S120	Q8BIQ5;S120	-0.679861	-0.692814	-1.68877	0.0985929	0.900669
Dcp1a;S162	Q91YD3;S162	0.63516	-2.32925	1.68941	0.0984707	0.900669
Ddn;S354	Q80TS7;S354	-0.567751	1.5497	-1.71465	0.0936998	0.900669
Ddn;S388	Q80TS7;S388	-0.725362	-1.55377	-1.70362	0.0957608	0.900669
Dlg2;S360	Q91XM9;S360	2.20594	-0.499566	1.72237	0.0922778	0.900669
Dpysl2;S540	O08553;S540	-0.886196	1.30548	-1.68765	0.0988103	0.900669
Efr3b;S212	Q6ZQ18;S212	1.09792	0.642158	1.69501	0.0973955	0.900669
Fam163b;S128	Q8BUM6;S128	-0.62364	-1.55645	-1.71963	0.0927801	0.900669
Fgd1;S116	P52734;S116	-1.06573	-0.162599	-1.6875	0.0988387	0.900669
Gapdh;T151	P16858;T151	-0.620852	-0.00522528	-1.73217	0.0905013	0.900669
Gja1;S297	P23242;S297	0.733897	0.144754	1.74272	0.0886201	0.900669
Gpr162;S516	Q3UN16;S516	-0.87185	-2.31931	-1.6902	0.0983172	0.900669
Gramd1b;S30	Q80TI0;S30	0.776728	-1.19292	1.69691	0.0970327	0.900669
Hectd1;T1563	Q69ZR2;T1563	-0.933941	-0.79902	-1.70186	0.0960915	0.900669
Htatsf1;S645	Q8BGC0;S645	0.787947	0.304934	1.73124	0.0906693	0.900669
Inpp5f;S908	Q8CDA1;S908	-0.586694	1.55362	-1.70428	0.0956355	0.900669
Inpp5j;S279	P59644;S279	0.634462	-1.97004	1.74009	0.0890859	0.900669
Inpp5j;S310	P59644;S310	0.692588	-0.444904	1.72144	0.0924486	0.900669
Itpr1;S1755	P11881;S1755	-0.564068	2.59486	-1.70904	0.0947416	0.900669
Kalrn;S469	A2CG49;S469	1.0496	0.250218	1.71527	0.0935835	0.900669
Khsrp;S182	Q3U0V1;S182	-0.603346	0.691475	-1.73155	0.0906135	0.900669
Ksr2;T507	Q3UVC0;T507	-0.494435	-0.00585382	-1.71987	0.0927373	0.900669
Limch1;S525	Q3UH68;S525	-0.714748	-0.369001	-1.70321	0.0958379	0.900669
Lphn1;S1465	Q80TR1;S1465	-0.769227	-1.66336	-1.69996	0.0964516	0.900669
Map1a;S1205	Q9QYR6;S1205	-1.18973	3.29864	-1.72708	0.0914199	0.900669
Map2;S476	P20357;S476	-0.587289	2.34702	-1.70259	0.0959544	0.900669
Map2;S655	P20357;S655	0.964734	1.30113	1.68868	0.0986118	0.900669
Map2;T1160	P20357;T1160	-3.033	2.59835	-1.72005	0.0927028	0.900669
Mapt;S50	P10637;S50	-0.637139	-0.0741717	-1.73821	0.0894193	0.900669
Mapt;S714	P10637;S714	0.801061	-0.68928	1.71615	0.093422	0.900669
Mark4;S423	Q8CIP4;S423	-0.704921	1.38951	-1.70744	0.0950413	0.900669
Mast2;S1319	Q60592;S1319	-0.487925	-3.24312	-1.72921	0.0910345	0.900669
Mdm1;S539	Q9D067;S539	-0.654822	-1.87398	-1.68569	0.0991899	0.900669
Mtmr2;S21	Q9Z2D1;S21	0.642392	0.680149	1.7195	0.0928042	0.900669
Nefh;S769	P19246;S769	0.842515	2.33842	1.711	0.0943771	0.900669
Nppb;S109	P40753;S109	0.664286	1.69968	1.73548	0.089907	0.900669
Osbp;S349	Q3B7Z2;S349	0.882451	0.71223	1.68534	0.0992572	0.900669
Pclo;S1708	Q9QYX7;S1708	1.49887	2.00103	1.73182	0.0905647	0.900669
Pclo;S2495	Q9QYX7;S2495	0.540738	0.655917	1.71035	0.0944974	0.900669
Pdcl;S296	Q9DBX2;S296	0.557078	-1.02057	1.70878	0.0947915	0.900669
Pgk1;S203	P09411;S203	0.902524	1.63602	1.7081	0.0949187	0.900669
Plekhf2;S16	Q91WB4;S16	-0.566481	-0.316139	-1.71806	0.0930686	0.900669
Pllp;S9	Q9DCU2;S9	-0.504818	-0.899168	-1.69658	0.0970948	0.900669
Ppia;S51	P17742;S51	0.528862	-0.316655	1.71821	0.0930417	0.900669
Prkag2;S90	Q91WG5;S90	0.504201	0.303565	1.69904	0.0966269	0.900669
Prrc2b;S415	Q7TPM1;S415	-0.64443	-1.3261	-1.72538	0.0917291	0.900669
Ptk2b;T765	Q9QVP9;T765	1.23468	0.0312057	1.70725	0.0950771	0.900669
Rab11fip5;S486	Q8R361;S486	0.847967	1.51814	1.68976	0.0984025	0.900669
Rab3ip;S218	Q68EF0;S218	-0.629215	-2.07363	-1.71085	0.0944053	0.900669
Rabl6;T601	Q5U3K5;T601	0.854389	-0.876087	1.73243	0.0904537	0.900669
Rgs7;T245	O54829;T245	-1.09071	2.60966	-1.71671	0.0933175	0.900669
Rplp2;S102	P99027;S102	1.85534	0.0583627	1.72529	0.0917455	0.900669
Safb;S366	D3YXK2;S366	-0.448438	2.1341	-1.69008	0.0983411	0.900669
Sorbs1;S345	Q62417;S345	-0.491941	-0.210531	-1.71863	0.0929643	0.900669
Specc1;S133	Q5SXY1;S133	-0.487403	2.43488	-1.69212	0.097949	0.900669
Srrt;T543	Q99MR6;T543	0.724044	-1.03054	1.69578	0.0972478	0.900669
Syn1;S702	O88935;S702	-1.0697	-0.967248	-1.69232	0.0979105	0.900669
Syn1;T339	O88935;T339	-0.890538	0.176396	-1.7274	0.0913634	0.900669
Syn2;S87	Q64332;S87	-0.652777	-1.56333	-1.7318	0.0905684	0.900669
Tbc1d10b;S644	Q8BHL3;S644	-1.47541	-0.703866	-1.72171	0.0923991	0.900669
Tiam1;S1407	Q60610;S1407	-0.546004	1.39285	-1.70813	0.0949121	0.900669
Tmem222;S8	Q8BVA2;S8	0.669017	-2.69515	1.69577	0.097249	0.900669
Tmod2;S25	Q9JKK7;S25	-0.583153	-1.6918	-1.72717	0.0914047	0.900669
Tomm20;S135	Q9DCC8;S135	-0.623579	-0.736751	-1.71257	0.0940845	0.900669
Ttc7b;T196	E9Q6P5;T196	0.648155	-1.88672	1.68562	0.0992035	0.900669
Ubap2l;S482	Q80X50;S482	0.759282	-0.0750649	1.69175	0.0980189	0.900669
Usp47;S911	Q8BY87;S911	0.500775	-1.30329	1.70066	0.0963191	0.900669
Wasf3;S223	Q8VHI6;S223	-0.929611	0.314228	-1.69462	0.097469	0.900669
Wdfy3;S3321	Q6VNB8;S3321	-1.38613	-2.56529	-1.73232	0.0904745	0.900669
Agap1;S521	Q8BXK8;S521	0.678951	-0.580652	1.68246	0.0998179	0.901595
Gapdh;T81	P16858;T81	0.514507	-1.92091	1.68257	0.0997968	0.901595
Necap2;S181	Q9D1J1;S181	-0.523784	-1.03058	-1.68198	0.0999134	0.901595
Nsfl1c;S176	Q9CZ44;S176	1.31522	2.05647	1.68163	0.0999804	0.901595
Dmxl2;S1856	Q8BPN8;S1856	-0.528346	-1.25713	-1.67909	0.100478	0.902573
Fam21;S5	Q6PGL7;S5	-1.01327	1.38669	-1.67919	0.100458	0.902573
Gm996;S509	A2AJA9;S509	0.500916	-2.69237	1.67977	0.100345	0.902573
Lsm14a;T194	Q8K2F8;T194	-1.09015	-0.347506	-1.67849	0.100596	0.902573
Arhgdia;S34	Q99PT1;S34	-0.663512	3.01931	-1.67565	0.101155	0.904881
Dpysl5;S538	Q9EQF6;S538	-0.910341	-0.128666	-1.67404	0.101473	0.904881
Gpkow;S6	Q56A08;S6	-0.71252	-1.18817	-1.67285	0.101709	0.904881
Lppr3;S351	Q7TPB0;S351	-1.1121	-2.13971	-1.67262	0.101755	0.904881
Marcks;S160	P26645;S160	-0.715062	-0.266829	-1.67329	0.101621	0.904881
Rb1cc1;S243	Q9ESK9;S243	-0.723687	-2.42549	-1.67427	0.101428	0.904881
Sptbn1;S2183	Q62261;S2183	-0.436282	-2.10683	-1.67204	0.101869	0.904881
Zc3h4;S1276	Q6ZPZ3;S1276	-0.709009	0.201603	-1.67622	0.101042	0.904881
Sik3;S721	Q6P4S6;S721	0.642391	1.66151	1.67129	0.102019	0.905083
Arhgap39;S282	P59281;S282	-0.48665	-0.770963	-1.66789	0.102695	0.905633
Atp2a2;S661	O55143;S661	-0.510143	-1.84634	-1.66715	0.102843	0.905633
Eif4g3;S1151	Q80XI3;S1151	0.45762	0.608729	1.66834	0.102606	0.905633
Elfn1;S674	Q8C8T7;S674	0.896899	-2.03389	1.66953	0.102368	0.905633
Inpp5f;S123	Q8CDA1;S123	-0.485364	-0.089914	-1.66651	0.102971	0.905633
Mink1;S644	Q9JM52;S644	-0.73513	4.02964	-1.66683	0.102907	0.905633
Tceal3;S30	Q8R0A5;S30	-0.679372	5.11906	-1.66862	0.10255	0.905633
C2cd2l;S662	Q80X80;S662	0.616037	0.254991	1.66373	0.103529	0.909423
Mark1;S394	Q8VHJ5;S394	0.792806	0.0443689	1.65811	0.104664	0.916005
Nefh;S815	P19246;S815	1.68148	-3.35791	1.65828	0.104629	0.916005
Smad2;T8	Q62432;T8	0.918409	-0.74335	1.65935	0.104412	0.916005
Epb41l1;S69	Q9Z2H5;S69	1.11625	0.579076	1.65655	0.104981	0.916524
Rbm43;S137	Q99J64;S137	-0.668399	-1.13589	-1.65704	0.104882	0.916524
Add2;S614	Q9QYB8;S614	0.90971	3.02002	1.65467	0.105364	0.916595
Map2;S608	P20357;S608	0.460866	0.93045	1.65462	0.105375	0.916595
Plch2;S676	A2AP18;S676	-0.350728	2.53383	-1.65494	0.105309	0.916595
Bsn;S1236	O88737;S1236	-1.0476	3.55824	-1.65391	0.105519	0.916729
Ap2a1;T650	P17426;T650	1.32164	-0.744433	1.65023	0.106273	0.921034
Ggct;S173	Q9D7X8;S173	-0.427131	-1.93838	-1.65055	0.106207	0.921034
4932418E24Rik;T2	Q8C5V8;T2	-0.495341	-1.9897	-1.52693	0.134191	0.92152
Abcf1;S103	Q6P542;S103	0.759678	-1.46534	1.40678	0.166769	0.92152
Abi2;S301	P62484;S301	-0.478812	0.0953819	-1.58859	0.119572	0.92152
Abl2;S632	Q4JIM5;S632	-0.39978	-0.649993	-1.40787	0.166447	0.92152
Acaca;S25	Q5SWU9;S25	1.08429	-1.73668	1.51749	0.136551	0.92152
Actb;S239	P63260;S239	-0.800447	0.910565	-1.28605	0.205395	0.92152
Adcyap1r1;S488	P70205;S488	-0.537753	-2.5132	-1.32289	0.192949	0.92152
Add1;S12	Q9QYC0;S12	0.631115	6.11192	1.61806	0.113053	0.92152
Add1;S364	Q9QYC0;S364	0.955488	-0.757785	1.56081	0.125991	0.92152
Add1;S420	Q9QYC0;S420	1.24708	1.40128	1.30962	0.197364	0.92152
Add1;T358	Q9QYC0;T358	1.072	3.59113	1.44268	0.156445	0.92152
Add2;S598	Q9QYB8;S598	0.42377	3.3395	1.49638	0.141949	0.92152
Add2;S606	Q9QYB8;S606	1.14171	3.40348	1.59566	0.11798	0.92152
Adra2a;S362	Q01338;S362	1.23987	-3.08108	1.4589	0.151949	0.92152
Afap1;S665	Q80YS6;S665	0.501504	-0.887152	1.54559	0.129624	0.92152
Agap2;S746	Q3UHD9;S746	-0.359959	1.23274	-1.53835	0.131381	0.92152
Agap2;T381	Q3UHD9;T381	-0.641736	-0.361692	-1.46648	0.149885	0.92152
Agfg1;S167	Q8K2K6;S167	-0.845962	1.99121	-1.44882	0.154733	0.92152
Agfg1;S181	Q8K2K6;S181	-0.693937	2.00115	-1.28166	0.206916	0.92152
Ahdc1;S1540	Q6PAL7;S1540	0.658647	-2.92811	1.57711	0.122191	0.92152
Akap10;S281	O88845;S281	-0.56614	-0.788214	-1.54963	0.128651	0.92152
Akap12;S505	Q9WTQ5;S505	-0.4846	-1.4623	-1.40316	0.16784	0.92152
Akap12;S598	Q9WTQ5;S598	-1.32126	0.0381149	-1.27166	0.210416	0.92152
Akap5;S22	D3YVF0;S22	0.830211	2.17626	1.50285	0.140277	0.92152
Akap5;T172	D3YVF0;T172	-0.465235	-0.219279	-1.40162	0.168296	0.92152
Akt1s1;S184	Q9D1F4;S184	0.797224	-2.7056	1.37181	0.177327	0.92152
Akt1s1;S88	Q9D1F4;S88	-0.500071	2.03037	-1.48907	0.143858	0.92152
Akt1s1;T247	Q9D1F4;T247	0.583199	-0.590355	1.28282	0.206513	0.92152
Aldoa;S39	P05064;S39	-0.451817	2.8298	-1.42651	0.16103	0.92152
Amer2;S223	Q8CCJ4;S223	0.411847	1.97591	1.62365	0.111851	0.92152
Amer2;S227	Q8CCJ4;S227	-0.56547	1.40228	-1.28604	0.205397	0.92152
Amigo1;S476	Q80ZD8;S476	-0.376861	-4.24168	-1.27324	0.209859	0.92152
Amph;S262	Q7TQF7;S262	-0.496899	5.88029	-1.32426	0.1925	0.92152
Amph;S518	Q7TQF7;S518	-1.50553	2.35197	-1.61211	0.114346	0.92152
Amph;T260	Q7TQF7;T260	-0.687247	4.04742	-1.64124	0.108134	0.92152
Amph;T312	Q7TQF7;T312	0.557073	-1.90981	1.34301	0.186401	0.92152
Anapc4;T781	Q91W96;T781	0.667869	-0.21782	1.64182	0.108012	0.92152
Ank2;S1793	Q8C8R3;S1793	2.0097	-3.66592	1.53592	0.131976	0.92152
Ank2;S2475	Q8C8R3;S2475	-0.847356	2.26489	-1.59222	0.118752	0.92152
Ank2;S2755	Q8C8R3;S2755	-0.41729	2.06599	-1.27806	0.208169	0.92152
Ank3;S1462	G5E8K5;S1462	-0.545329	-1.63704	-1.29777	0.201371	0.92152
Ank3;S606	G5E8K5;S606	0.737996	-0.868128	1.64317	0.107732	0.92152
Ankrd63;T342	A2ARS0;T342	0.679589	0.532534	1.37437	0.176536	0.92152
Anks1b;S738	Q8BIZ1;S738	-0.527564	-0.345322	-1.44758	0.155076	0.92152
Ap3b1;S276	Q9Z1T1;S276	0.396678	-0.489343	1.31995	0.193924	0.92152
Ap3d1;S754	O54774;S754	1.54094	-0.474597	1.48367	0.145279	0.92152
Ap3d1;S784	O54774;S784	0.866214	4.94862	1.37806	0.175402	0.92152
Apba2;T307	P98084;T307	-0.53141	-1.02493	-1.35428	0.182809	0.92152
Apc2;S108	Q9Z1K7;S108	-0.429125	-0.142281	-1.26473	0.212864	0.92152
Aqp4;S276	P55088;S276	1.18976	1.54796	1.29609	0.201943	0.92152
Arfgap1;S344	Q9EPJ9;S344	-0.7348	1.54573	-1.40245	0.168049	0.92152
Arfgef1;S1566	G3X9K3;S1566	-0.383566	1.2293	-1.28166	0.206915	0.92152
Arfgef2;S1520	A2A5R2;S1520	-0.573936	-1.38149	-1.49993	0.14103	0.92152
Arhgap1;S51	Q5FWK3;S51	0.917321	1.369	1.34041	0.187237	0.92152
Arhgap21;S248	Q6DFV3;S248	-0.426972	-1.60802	-1.37079	0.17764	0.92152
Arhgap21;S469	Q6DFV3;S469	0.493233	-1.22015	1.3921	0.171138	0.92152
Arhgap21;S471	Q6DFV3;S471	-0.340547	0.64345	-1.30875	0.197657	0.92152
Arhgap21;T740	Q6DFV3;T740	1.03518	-1.5986	1.38385	0.173635	0.92152
Arhgap23;S582	Q69ZH9;S582	0.866591	-2.24817	1.49973	0.141082	0.92152
Arhgap23;S619	Q69ZH9;S619	0.893401	2.80773	1.33005	0.1906	0.92152
Arhgap23;T325	Q69ZH9;T325	1.01939	0.539002	1.37917	0.175062	0.92152
Arhgap26;S609	Q6ZQ82;S609	0.590485	-0.721716	1.43699	0.158047	0.92152
Arhgap32;S1405	Q811P8;S1405	-0.444116	0.55484	-1.62787	0.110949	0.92152
Arhgap32;S1689	Q811P8;S1689	-0.64305	-1.64429	-1.46675	0.14981	0.92152
Arhgap35;S970	Q91YM2;S970	-0.755181	1.24475	-1.53927	0.131156	0.92152
Arhgap39;S682	P59281;S682	-0.590988	-0.432857	-1.60953	0.114909	0.92152
Arhgef12;S1185	Q8R4H2;S1185	-0.850715	-2.37802	-1.51196	0.137949	0.92152
Arhgef12;S41	Q8R4H2;S41	-0.6919	-0.560323	-1.64362	0.107638	0.92152
Arhgef12;T736	Q8R4H2;T736	0.859608	0.815543	1.55074	0.128384	0.92152
Arhgef17;S728	Q80U35;S728	-0.387604	-1.78026	-1.36779	0.178572	0.92152
Arhgef2;S163	Q60875;S163	-0.48463	0.682658	-1.46442	0.150442	0.92152
Arhgef6;S639	Q8K4I3;S639	0.484338	2.42872	1.28452	0.205921	0.92152
Arhgef6;S679	Q8K4I3;S679	-1.11606	-1.81041	-1.61659	0.113371	0.92152
Arhgef7;S750	Q9ES28;S750	-0.569036	0.621784	-1.42622	0.161114	0.92152
Arpp19;S67	P60840;S67	-0.685798	0.422959	-1.31858	0.194375	0.92152
Arpp21;S32	Q9DCB4;S32	-0.3607	-0.928526	-1.33206	0.189945	0.92152
Astn1;S194	Q61137;S194	-0.499594	0.744693	-1.26679	0.212135	0.92152
Astn1;S216	Q61137;S216	-0.606443	1.06108	-1.57103	0.123597	0.92152
Atad1;S322	Q9D5T0;S322	-0.438376	2.94272	-1.54946	0.128692	0.92152
Atat1;S315	Q8K341;S315	-0.724258	-1.51984	-1.44058	0.157036	0.92152
Ate1;S166	Q9Z2A5;S166	-0.604704	-0.73282	-1.26954	0.21116	0.92152
Ate1;S174	Q9Z2A5;S174	0.525185	-1.83891	1.49946	0.141153	0.92152
Atl1;S18	Q8BH66;S18	-0.681732	1.40109	-1.42177	0.162395	0.92152
Atl1;S19	Q8BH66;S19	0.966171	-0.284528	1.2983	0.20119	0.92152
Atp1a1;S16	Q8VDN2;S16	0.917667	-0.246837	1.51143	0.138084	0.92152
Atp2b2;S1155	Q9R0K7;S1155	1.25413	2.26734	1.30254	0.199751	0.92152
Atp2b4;S329	Q6Q477;S329	-0.542334	-0.152688	-1.50368	0.140065	0.92152
Atp8a1;S29	P70704;S29	0.682976	0.51068	1.34015	0.187324	0.92152
Atxn2;T710	O70305;T710	0.502879	-1.81196	1.3012	0.200205	0.92152
Bai2;S1503	Q8CGM1;S1503	-0.500691	1.55311	-1.37653	0.175872	0.92152
Baiap2;T361	Q8BKX1;T361	0.621776	0.80307	1.37476	0.176416	0.92152
Basp1;S173	Q91XV3;S173	0.542442	-0.230144	1.32084	0.193629	0.92152
Basp1;S92	Q91XV3;S92	-0.364613	6.15243	-1.64373	0.107615	0.92152
Bcas3;S838	Q8CCN5;S838	0.569496	-1.64519	1.50116	0.140713	0.92152
Bckdha;S334	P50136;S334	-1.45247	0.635807	-1.37308	0.176934	0.92152
Bcr;S475	Q6PAJ1;S475	-0.460361	-0.236773	-1.33911	0.187658	0.92152
Bet1;S50	O35623;S50	-0.562095	-0.0192189	-1.50962	0.138544	0.92152
Bmpr2;S863	O35607;S863	-0.453337	0.301086	-1.30902	0.197566	0.92152
Bola1;S81	Q9D8S9;S81	-0.625068	-1.53744	-1.50994	0.138463	0.92152
Braf;S787	P28028;S787	-0.388093	-1.95308	-1.38866	0.172175	0.92152
Brap;S116	Q99MP8;S116	-0.681538	-0.0979266	-1.5902	0.119207	0.92152
Brsk1;S499	Q5RJI5;S499	0.586523	-1.18748	1.33967	0.187476	0.92152
Brsk1;S587	Q5RJI5;S587	-0.664084	-1.3131	-1.48605	0.144651	0.92152
Brsk2;S482	Q69Z98;S482	0.701079	-2.44448	1.26919	0.211284	0.92152
Bsn;S3231	O88737;S3231	-0.58483	1.14621	-1.344	0.186083	0.92152
Bsn;S789	O88737;S789	1.61086	1.73961	1.29847	0.201133	0.92152
Bsn;S833	O88737;S833	0.553275	-1.86635	1.48251	0.145589	0.92152
C2cd2l;S464	Q80X80;S464	-0.927638	3.20445	-1.28527	0.205663	0.92152
C2cd5;S817	Q7TPS5;S817	0.676161	0.277259	1.6376	0.108895	0.92152
Cacna1e;S450	Q61290;S450	-0.364387	-1.14525	-1.29178	0.20342	0.92152
Cacna1e;S758	Q61290;S758	0.649988	-2.19206	1.49358	0.142677	0.92152
Cacna1e;S873	Q61290;S873	-1.31204	0.783831	-1.48608	0.144645	0.92152
Cacnb1;T499	Q8R3Z5;T499	-0.738106	1.77452	-1.50968	0.138529	0.92152
Cacng3;S302	Q9JJV5;S302	0.635381	-0.545977	1.34409	0.186055	0.92152
Cacng7;S273	P62956;S273	-0.445924	-0.913399	-1.4608	0.151429	0.92152
Cacybp;S50	Q9CXW3;S50	-0.537367	-2.30857	-1.41346	0.164809	0.92152
Cadm1;S448	Q8R5M8;S448	-0.376803	0.398848	-1.38387	0.17363	0.92152
Camk2a;S404	P11798;S404	-0.843327	-0.0408153	-1.28601	0.205406	0.92152
Camk2a;T337	P11798;T337	-0.776525	4.33941	-1.56754	0.12441	0.92152
Camk4;T196	P08414;T196	-0.576568	-0.713958	-1.40546	0.167158	0.92152
Camkv;T430	Q3UHL1;T430	0.845433	1.24508	1.39301	0.170865	0.92152
Camsap1;S1407	A2AHC3;S1407	0.549245	-1.86544	1.42876	0.160387	0.92152
Camsap1;S481	A2AHC3;S481	-0.548697	2.00026	-1.56854	0.124177	0.92152
Camsap3;S431	Q80VC9;S431	-0.510374	1.34608	-1.54576	0.129582	0.92152
Cap1;S307	P40124;S307	-0.690983	2.14606	-1.42325	0.161968	0.92152
Cap2;S311	Q9CYT6;S311	1.02985	-0.0135262	1.27313	0.209898	0.92152
Cap2;S316	Q9CYT6;S316	-0.697394	1.3087	-1.36684	0.178867	0.92152
Caskin1;S420	Q6P9K8;S420	-0.738461	-2.51994	-1.55104	0.128312	0.92152
Caskin1;S423	Q6P9K8;S423	-0.777826	0.552228	-1.62205	0.112195	0.92152
Caskin1;S650	Q6P9K8;S650	-0.620705	2.05771	-1.3148	0.195634	0.92152
Caskin1;T1268	Q6P9K8;T1268	-0.555675	1.65725	-1.50396	0.139991	0.92152
Cbl;S617	P22682;S617	0.532128	-1.54541	1.47	0.148931	0.92152
Ccdc136;S50	Q3TVA9;S50	-0.904297	-1.56103	-1.35916	0.181269	0.92152
Ccdc6;S316	D3YZP9;S316	0.66405	0.0300308	1.52637	0.134332	0.92152
Ccny;S73	Q8BGU5;S73	-0.496276	-1.63766	-1.3104	0.197102	0.92152
Ccny;S83	Q8BGU5;S83	-0.439501	-0.466631	-1.26667	0.212177	0.92152
Ccsap;S79	Q8QZT2;S79	-0.651938	-1.56823	-1.52367	0.135003	0.92152
Ccz1;S264	Q8C1Y8;S264	-0.490093	1.22119	-1.42157	0.162454	0.92152
Cdc16;S560	Q8R349;S560	-0.44841	-1.94504	-1.34997	0.184177	0.92152
Cdc42bpb;S1695	Q7TT50;S1695	0.789872	0.624875	1.56561	0.124861	0.92152
Cdc42ep1;S207	Q91W92;S207	-0.753771	0.626241	-1.28438	0.205971	0.92152
Cdc42ep2;S109	Q8JZX9;S109	0.634185	-2.17294	1.29848	0.201128	0.92152
Cdh10;S784	P70408;S784	0.588298	-0.0244266	1.36865	0.178305	0.92152
Cdk16;S119	Q04735;S119	-0.538915	1.69799	-1.56479	0.125053	0.92152
Cdk17;S146	Q8K0D0;S146	-0.538915	1.69799	-1.56479	0.125053	0.92152
Cdk17;S180	Q8K0D0;S180	-0.561346	1.69073	-1.32249	0.193082	0.92152
Cdk18;S75	Q04899;S75	0.684311	-0.924003	1.61133	0.114517	0.92152
Cend1;S10	Q9JKC6;S10	0.693683	3.40061	1.27841	0.208049	0.92152
Cep104;S327	Q80V31;S327	-0.531225	-2.59808	-1.47833	0.146699	0.92152
Cep170;S1296	Q6A065;S1296	0.491948	-2.97014	1.33145	0.190144	0.92152
Cep170b;S360	Q80U49;S360	0.646689	1.38223	1.40947	0.165976	0.92152
Cep170b;S653	Q80U49;S653	0.61957	-1.92929	1.46661	0.149847	0.92152
Cfl1;S3	P18760;S3	-1.07591	0.525675	-1.37531	0.176248	0.92152
Chn1;T192	Q91V57;T192	-0.579639	0.950753	-1.29039	0.203897	0.92152
Ciapin1;S136	Q8WTY4;S136	-0.362331	0.135658	-1.307	0.198245	0.92152
Ckap2l;T274	Q7TS74;T274	0.715864	-1.01721	1.60893	0.115042	0.92152
Ckb;S128	Q04447;S128	-0.914715	0.797783	-1.32775	0.191352	0.92152
Ckb;T255	Q04447;T255	-0.532263	-3.10426	-1.30263	0.19972	0.92152
Clasp1;S1110	Q80TV8;S1110	-0.52407	-0.936452	-1.35037	0.184049	0.92152
Clip3;S399	B9EHT4;S399	-0.698283	0.109448	-1.30837	0.197785	0.92152
Clvs1;S329	Q9D4C9;S329	0.447554	0.873276	1.31305	0.196216	0.92152
Cnksr2;S390	Q80YA9;S390	-0.41373	2.42612	-1.57414	0.122876	0.92152
Cnksr2;S488	Q80YA9;S488	-0.52859	-2.32623	-1.58678	0.119982	0.92152
Cnp;S169	P16330;S169	0.363319	-0.00890567	1.31703	0.194892	0.92152
Cnp;S4	P16330;S4	0.827371	0.395336	1.29869	0.201057	0.92152
Cnr1;T314	P47746;T314	-0.470736	3.6184	-1.41845	0.163357	0.92152
Cntn1;T586	P12960;T586	0.482975	-0.0284752	1.30276	0.199676	0.92152
Cntn1;Y583	P12960;Y583	0.518541	-0.0380811	1.38931	0.17198	0.92152
Cntnap1;S1382	O54991;S1382	-0.794914	1.36331	-1.48608	0.144645	0.92152
Cpne6;T548	Q9Z140;T548	1.23418	0.222045	1.28722	0.204989	0.92152
Crmp1;S524	P97427;S524	2.22157	-1.52078	1.53674	0.131775	0.92152
Cspg5;S475	Q71M36;S475	-0.758334	-0.707266	-1.50533	0.139641	0.92152
Cstf3;S691	Q99LI7;S691	0.644964	0.380332	1.47578	0.147379	0.92152
Ctnna1;S655	P26231;S655	-0.675321	1.58923	-1.34376	0.186162	0.92152
Ctnnb1;S675	Q02248;S675	0.390567	0.354583	1.27701	0.208535	0.92152
Ctnnd1;S349	P30999;S349	-0.967039	-0.607492	-1.64152	0.108075	0.92152
Ctnnd2;S1082	O35927;S1082	-0.61531	-1.13414	-1.5321	0.132914	0.92152
Ctr9;S970	Q62018;S970	0.533792	-0.995804	1.30698	0.198251	0.92152
Cttnbp2nl;S567	Q99LJ0;S567	0.744773	-1.68747	1.58992	0.119269	0.92152
Cx3cl1;S262	O35188;S262	0.446967	0.368743	1.29916	0.200896	0.92152
Cyfip1;S872	Q7TMB8;S872	-0.493014	-2.72698	-1.44574	0.155589	0.92152
Dact3;S237	Q0PHV7;S237	0.769543	-0.315278	1.60054	0.116893	0.92152
Dact3;S409	Q0PHV7;S409	-0.400421	-0.571564	-1.27813	0.208145	0.92152
Dagla;S733	Q6WQJ1;S733	-0.455725	-0.783019	-1.36357	0.179888	0.92152
Dagla;S786	Q6WQJ1;S786	-0.520591	-1.92486	-1.3305	0.190455	0.92152
Dagla;S808	Q6WQJ1;S808	0.478869	-0.622035	1.39426	0.170491	0.92152
Dagla;S835	Q6WQJ1;S835	-0.647326	-2.14249	-1.44554	0.155645	0.92152
Daglb;S582	Q91WC9;S582	-0.402636	-1.25717	-1.37911	0.17508	0.92152
Dbn1;S658	Q9QXS6;S658	-0.438801	1.72271	-1.43131	0.159661	0.92152
Ddx3x;S90	Q62167;S90	-0.641323	0.12769	-1.41099	0.165531	0.92152
Dennd5a;T1079	Q6PAL8;T1079	-0.823616	-0.404512	-1.57689	0.122242	0.92152
Denr;S73	Q9CQJ6;S73	0.616843	2.99258	1.42469	0.161555	0.92152
Dffa;S314	O54786;S314	-0.551905	-1.74855	-1.28499	0.20576	0.92152
Dhx30;S249	Q99PU8;S249	-0.371683	-1.25423	-1.34658	0.185257	0.92152
Dlg1;S619	Q811D0;S619	0.528534	-2.77695	1.26682	0.212122	0.92152
Dlgap2;S1012	Q8BJ42;S1012	0.807558	1.89539	1.41712	0.163741	0.92152
Dlgap3;S641	Q6PFD5;S641	0.571443	-0.814928	1.40186	0.168224	0.92152
Dlgap4;S574	Q8BJ42;S574	1.68791	-2.66486	1.41253	0.165082	0.92152
Dlgap4;S665	B1AZP2;S665	-0.763634	-1.48936	-1.3765	0.175882	0.92152
Dlgap4;T915	B1AZP2;T915	-0.357672	0.932274	-1.32883	0.191001	0.92152
Dmap1;T446	Q9JI44;T446	-0.523239	-0.901095	-1.34808	0.18478	0.92152
Dmtn;T304	Q9WV69;T304	-1.12354	1.85813	-1.6237	0.11184	0.92152
Dmwd;S643	Q08274;S643	-0.423301	1.40244	-1.36724	0.178742	0.92152
Dmxl2;S1141	Q8BPN8;S1141	0.851779	0.157197	1.57294	0.123155	0.92152
Dmxl2;S1152	Q8BPN8;S1152	0.657243	-1.37111	1.42412	0.161718	0.92152
Dnaja4;S113	Q9JMC3;S113	-0.537078	-3.02625	-1.34778	0.184875	0.92152
Dnajc5;S12	P60904;S12	1.32432	-0.269525	1.48674	0.14447	0.92152
Dnm1;S774	P39053;S774	2.18185	-0.771834	1.51346	0.137571	0.92152
Doc2a;S226	Q7TNF0;S226	0.548601	-1.10156	1.42695	0.160904	0.92152
Doc2b;S411	P70169;S411	0.632397	-2.17811	1.30909	0.197543	0.92152
Dock10;S877	Q8BZN6;S877	-0.609203	-0.67011	-1.62942	0.110621	0.92152
Dock2;S1729	Q8C3J5;S1729	-0.665729	-0.613274	-1.52762	0.134021	0.92152
Dock4;S1709	P59764;S1709	0.840091	-0.766048	1.47285	0.148164	0.92152
Dos;S389	Q66L44;S389	0.459684	1.25249	1.4254	0.16135	0.92152
Dos;T150	Q66L44;T150	-0.47946	-1.05468	-1.28245	0.20664	0.92152
Dpf2;T248	Q61103;T248	-0.797852	0.76261	-1.5615	0.125827	0.92152
Dpysl2;S522	O08553;S522	1.01073	4.57092	1.33237	0.189845	0.92152
Dpysl2;S570	O08553;S570	-1.50205	-0.000316805	-1.58645	0.120055	0.92152
Dpysl3;S518	Q62188;S518	-0.526927	4.33824	-1.3312	0.190224	0.92152
Dpysl4;S544	O35098;S544	1.14	0.238039	1.3254	0.192125	0.92152
Dstn;S3	Q9R0P5;S3	-0.928932	0.474541	-1.42074	0.162693	0.92152
Dvl3;S125	Q61062;S125	-0.581589	1.4322	-1.33338	0.189516	0.92152
Dync1i2;S81	O88487;S81	0.608223	-0.57461	1.3241	0.192551	0.92152
Efr3b;S214	Q6ZQ18;S214	1.03863	0.110526	1.26967	0.211116	0.92152
Efr3b;S216	Q6ZQ18;S216	1.00522	0.455887	1.466	0.150013	0.92152
Ehd1;S456	Q9WVK4;S456	0.655591	-2.47777	1.44154	0.156765	0.92152
Eif3b;S123	Q8JZQ9;S123	0.560077	1.92041	1.5013	0.140677	0.92152
Eif3b;S75	Q8JZQ9;S75	1.43307	2.9944	1.56378	0.125292	0.92152
Eif4enif1;S76	Q9EST3;S76	-0.549077	-1.24203	-1.3527	0.183309	0.92152
Elfn1;S773	Q8C8T7;S773	-0.377741	-2.25231	-1.34111	0.187013	0.92152
Elfn2;S451	Q68FM6;S451	-0.538824	-0.780796	-1.47377	0.147917	0.92152
Epb41l1;S407	Q9Z2H5;S407	-0.41027	-2.11501	-1.37206	0.177249	0.92152
Epb41l1;S430	Q9Z2H5;S430	-0.769857	1.8322	-1.37939	0.174995	0.92152
Epb41l1;S541	Q9Z2H5;S541	0.812699	1.79602	1.43009	0.160007	0.92152
Epb41l1;T550	Q9Z2H5;T550	-0.526927	4.08707	-1.38427	0.173507	0.92152
Epb41l1;T78	Q9Z2H5;T78	0.735746	0.936633	1.29161	0.203477	0.92152
Epb41l3;S547	Q9WV92;S547	0.612832	-0.472534	1.38937	0.171963	0.92152
Epb41l3;T495	Q9WV92;T495	-0.369903	4.06588	-1.64057	0.108273	0.92152
Eps15l1;S108	Q60902;S108	-0.561872	-1.17837	-1.31981	0.193968	0.92152
Eps15l1;S229	Q60902;S229	-0.35225	0.919468	-1.52138	0.135576	0.92152
Eps15l1;S558	Q60902;S558	0.764932	1.13809	1.50967	0.138531	0.92152
Eps15l1;S610	Q60902;S610	-0.704766	-2.00463	-1.34206	0.186708	0.92152
Eps8;S684	Q08509;S684	-0.602312	-1.54306	-1.56422	0.125189	0.92152
Ercc6;S1329	F8VPZ5;S1329	-0.907301	0.305872	-1.415	0.164359	0.92152
F11r;S285	O88792;S285	-0.57277	-1.69971	-1.43879	0.157539	0.92152
Fam114a2;S119	Q8VE88;S119	0.86735	-0.136683	1.29743	0.201487	0.92152
Fam117b;S452	Q3U3E2;S452	0.540282	-0.881156	1.41741	0.163657	0.92152
Fam122a;S144	Q9DB52;S144	-0.479762	-2.0102	-1.34646	0.185298	0.92152
Fam122a;S186	Q9DB52;S186	-0.534161	-1.4776	-1.56007	0.126164	0.92152
Fam126a;S433	Q6P9N1;S433	0.514625	-1.36967	1.39898	0.169081	0.92152
Fam131b;S102	Q3TY60;S102	0.609628	-1.05873	1.47257	0.148238	0.92152
Fam13c;S99	Q9DBR2;S99	-0.463835	1.77574	-1.64763	0.106808	0.92152
Fam160b1;S187	Q8CDM8;S187	-0.49371	-2.6345	-1.54457	0.129869	0.92152
Fam63b;S99	Q6PDI6;S99	-0.422681	-0.343565	-1.57091	0.123624	0.92152
Fbxo41;S21	Q6NS60;S21	0.401444	-1.34019	1.31803	0.19456	0.92152
Fbxo42;S552	Q6PDJ6;S552	0.773818	-1.96215	1.4569	0.152498	0.92152
Fcho2;S487	Q3UQN2;S487	-0.922568	0.136937	-1.64256	0.107859	0.92152
Fgd2;S561	Q8BY35;S561	0.366896	2.26579	1.4245	0.16161	0.92152
Fgf13;S208	P70377;S208	0.570909	0.756171	1.62778	0.11097	0.92152
Fnbp1l;S295	Q8K012;S295	-0.303118	0.524126	-1.32154	0.193395	0.92152
Fnbp1l;S488	Q8K012;S488	0.740069	1.46438	1.53465	0.132287	0.92152
Foxk1;S402	P42128;S402	-0.571696	-0.535163	-1.36514	0.179396	0.92152
Foxk1;S406	P42128;S406	-0.571696	-0.548406	-1.34548	0.185612	0.92152
Foxk2;S24	Q3UCQ1;S24	0.694071	-1.06692	1.29616	0.20192	0.92152
Fxyd1;S83	Q9Z239;S83	-1.43465	3.42347	-1.35641	0.182137	0.92152
Fxyd7;S72	P59648;S72	-1.25321	-1.26335	-1.29771	0.201391	0.92152
G3bp1;S149	P97855;S149	0.737129	0.810362	1.45932	0.151833	0.92152
G3bp2;T227	P97379;T227	-0.326169	1.72909	-1.2854	0.205617	0.92152
Gab2;S401	Q9Z1S8;S401	-0.432864	-0.125307	-1.56959	0.123933	0.92152
Gap43;S142	P06837;S142	0.355354	6.53887	1.41672	0.163857	0.92152
Gapvd1;S902	Q6PAR5;S902	-0.466885	-1.33686	-1.30497	0.19893	0.92152
Gapvd1;T762	Q6PAR5;T762	0.724881	-0.402397	1.28776	0.204802	0.92152
Gfap;T107	P03995;T107	-0.436661	-2.10225	-1.47726	0.146984	0.92152
Gfpt1;S259	P47856;S259	-0.499084	1.20801	-1.56443	0.125138	0.92152
Gigyf2;S237	Q6Y7W8;S237	0.797898	0.451615	1.57599	0.122448	0.92152
Gipc3;S222	Q8R5M0;S222	-0.469433	0.877453	-1.36148	0.180541	0.92152
Gja1;S296	P23242;S296	1.09562	-1.40246	1.55323	0.127789	0.92152
Gja1;S328	P23242;S328	1.64696	2.5293	1.44654	0.155367	0.92152
Gja1;S365	P23242;S365	0.863959	1.44201	1.54463	0.129854	0.92152
Gm996;S52	A2AJA9;S52	0.601672	0.304521	1.27778	0.208268	0.92152
Gnl1;S51	P36916;S51	-0.559308	2.21495	-1.35394	0.182916	0.92152
Golga5;S116	Q9QYE6;S116	-0.499212	-1.15922	-1.32877	0.191021	0.92152
Got1;S5	P05201;S5	0.537078	-2.76753	1.34903	0.184475	0.92152
Gpm6b;S320	P35803;S320	0.556826	4.9922	1.33401	0.18931	0.92152
Gpn1;S338	Q8VCE2;S338	0.769544	-0.393539	1.56726	0.124475	0.92152
Gpr158;S904	Q8C419;S904	-0.453549	1.47861	-1.4349	0.15864	0.92152
Gpr162;S534	Q3UN16;S534	0.610163	-0.475807	1.52362	0.135015	0.92152
Gpr162;S542	Q3UN16;S542	0.502428	-0.74555	1.39184	0.171218	0.92152
Gpr37l1;S471	Q99JG2;S471	0.812862	-1.2523	1.40286	0.167928	0.92152
Gpr37l1;T479	Q99JG2;T479	-1.32484	-3.04612	-1.63163	0.110153	0.92152
Gprin1;S219	Q3UNH4;S219	-0.266641	2.10337	-1.26469	0.21288	0.92152
Gprin1;S714	Q3UNH4;S714	-0.260019	1.19536	-1.29477	0.202396	0.92152
Gprin1;T582	Q3UNH4;T582	-0.60603	-1.17967	-1.49559	0.142156	0.92152
Gps1;S454	Q99LD4;S454	-0.58119	1.92219	-1.45181	0.153902	0.92152
Gramd1b;S274	Q80TI0;S274	0.644776	1.80322	1.4483	0.154877	0.92152
Grid1;S882	Q61627;S882	-0.53119	-0.428006	-1.41132	0.165433	0.92152
Grin2a;S948	P35436;S948	0.449634	-2.15945	1.40793	0.166431	0.92152
Grin2a;Y1051	P35436;Y1051	0.473491	-0.620602	1.27807	0.208167	0.92152
Grin2b;S1064	Q01097;S1064	0.657015	0.400759	1.37549	0.176192	0.92152
Grin2b;S1303	Q01097;S1303	-0.650836	2.95047	-1.54703	0.129276	0.92152
Grip1;T971	Q925T6;T971	0.38716	0.580519	1.56967	0.123914	0.92152
Grm1;T988	P97772;T988	0.655139	-0.0977118	1.39389	0.170601	0.92152
Gtpbp1;S47	O08582;S47	0.688974	0.274572	1.41719	0.163721	0.92152
Hba;S53	P01942;S53	-0.485722	-0.349544	-1.41116	0.165483	0.92152
Hdgfrp2;S366	Q3UMU9;S366	0.767313	-0.947161	1.49549	0.142182	0.92152
Hdgfrp2;S367	Q3UMU9;S367	0.747661	-0.960822	1.44063	0.157021	0.92152
Hectd1;S1572	Q69ZR2;S1572	-0.870009	-0.771556	-1.61881	0.112892	0.92152
Hectd1;S633	Q69ZR2;S633	-0.610821	0.981434	-1.26781	0.211771	0.92152
Hecw2;S742	Q6I6G8;S742	-0.882385	0.532732	-1.4827	0.145536	0.92152
Hepacam;S321	Q640R3;S321	-0.416136	1.20555	-1.2817	0.206903	0.92152
Hivep2;S801	Q3UHF7;S801	-0.676293	-0.987112	-1.45063	0.154229	0.92152
Hnrnpa2b1;S259	O88569;S259	-0.858827	0.414912	-1.32226	0.193158	0.92152
Hnrnpc;S241	Q9Z204;S241	0.852335	-1.81128	1.37712	0.17569	0.92152
Hnrnpd;S80	Q60668;S80	1.02611	-0.946831	1.39762	0.169486	0.92152
Homer3;S159	Q99JP6;S159	1.15338	1.67273	1.51225	0.137875	0.92152
Hspa8;T163	P63017;T163	0.555864	-3.71501	1.4522	0.153794	0.92152
Hspb1;S15	P14602;S15	-0.625938	-1.4498	-1.40321	0.167823	0.92152
Huwe1;S1907	Q7TMY8;S1907	0.554032	1.16254	1.4333	0.159095	0.92152
Huwe1;S3758	Q7TMY8;S3758	-0.873369	-2.68899	-1.4802	0.146201	0.92152
Igdcc4;T1236	Q9EQS9;T1236	-0.483066	-1.52199	-1.27526	0.209151	0.92152
Ina;S13	P46660;S13	-0.42557	-1.31177	-1.26422	0.213046	0.92152
Ina;S14	P46660;S14	-0.695277	-0.986135	-1.49959	0.141119	0.92152
Inpp5e;S103	Q9JII1;S103	-0.566859	-1.35062	-1.49413	0.142535	0.92152
Inpp5j;S325	P59644;S325	0.519481	-1.32318	1.48359	0.145301	0.92152
Iqgap2;S16	Q3UQ44;S16	-0.330614	-0.033556	-1.29789	0.201331	0.92152
Iqsec2;S1133	Q5DU25;S1133	-0.571307	-0.25753	-1.48934	0.143787	0.92152
Iqsec2;S214	Q5DU25;S214	-0.812085	1.70129	-1.32823	0.191196	0.92152
Iqsec2;S592	Q5DU25;S592	-0.77623	-1.28845	-1.31444	0.195751	0.92152
Iqsec3;S132	Q3TES0;S132	0.561218	1.14918	1.45458	0.153138	0.92152
Irgq;S319	Q8VIM9;S319	-0.433321	-3.05635	-1.60686	0.115495	0.92152
Iscu;S30	Q9D7P6;S30	0.850473	0.338378	1.35461	0.182706	0.92152
Itpr2;S937	Q9Z329;S937	-0.561598	-2.41284	-1.31509	0.195536	0.92152
Itsn1;S315	Q9Z0R4;S315	-0.824427	0.0614904	-1.55785	0.126691	0.92152
Jph3;S163	Q9ET77;S163	0.794415	-1.10998	1.49158	0.1432	0.92152
Jph3;S506	Q9ET77;S506	1.00961	-0.447251	1.47539	0.147485	0.92152
Jph4;S157	Q80WT0;S157	-0.488562	0.315007	-1.45397	0.153306	0.92152
Jup;S665	Q02257;S665	0.35434	-2.79263	1.29955	0.200765	0.92152
Kcnab1;T54	P63143;T54	-0.628858	-1.04992	-1.30652	0.198408	0.92152
Kcnab2;S112	P62482;S112	0.789888	-0.512994	1.60379	0.116172	0.92152
Kcnj6;T399	P48542;T399	0.571405	-1.15682	1.56189	0.125736	0.92152
Kcnk2;S366	P97438;S366	0.367237	-0.0991741	1.28552	0.205577	0.92152
Kcnk4;S324	O88454;S324	0.531879	-1.46914	1.48888	0.143908	0.92152
Kcnq2;S681	Q9Z351;S681	-0.365881	1.08311	-1.4209	0.162648	0.92152
Kctd16;S372	Q5DTY9;S372	0.694882	1.85602	1.27769	0.208297	0.92152
Kctd8;S413	Q50H33;S413	-0.479859	-2.53048	-1.36892	0.17822	0.92152
Kiaa1109;S1361	A2AAE1;S1361	-0.482705	-2.61995	-1.53672	0.13178	0.92152
Kiaa1211;S133	Q5PR69;S133	0.821647	-2.90913	1.43067	0.159841	0.92152
Kiaa1549;S1544	Q68FD9;S1544	0.552109	-1.06907	1.27096	0.210659	0.92152
Kiaa1549;S1570	Q68FD9;S1570	0.906999	-0.89599	1.50434	0.139896	0.92152
Kiaa1671;S246	Q8BRV5;S246	0.498887	-1.40152	1.2704	0.210858	0.92152
Kif1a;S1375	P33173;S1375	-0.412566	1.75514	-1.35623	0.182194	0.92152
Kif2a;S206	P28740;S206	-0.532518	-2.76105	-1.41383	0.1647	0.92152
Kif3b;S681	Q61771;S681	-0.524876	-1.36764	-1.30873	0.197665	0.92152
Klc2;S574	O88448;S574	0.570277	-2.62443	1.48876	0.14394	0.92152
Kmt2d;S4789	Q6PDK2;S4789	0.838321	-2.07434	1.40054	0.168616	0.92152
Ksr1;S320	Q61097;S320	-1.14855	-0.460721	-1.29463	0.202441	0.92152
Ksr1;S518	Q61097;S518	-0.793909	2.9742	-1.45768	0.152285	0.92152
Ksr2;S400	Q3UVC0;S400	0.731824	-1.04482	1.51399	0.137437	0.92152
Limch1;S217	Q3UH68;S217	-0.750154	-1.16607	-1.26536	0.212642	0.92152
Limch1;S303	Q3UH68;S303	-0.823635	-2.26123	-1.27779	0.208264	0.92152
Limk1;S274	P53668;S274	-0.834242	0.318681	-1.50882	0.138748	0.92152
Lmna;S392	P48678;S392	0.873427	0.220677	1.53008	0.133413	0.92152
Lphn1;S1319	Q80TR1;S1319	-0.618222	-1.82255	-1.54848	0.128927	0.92152
Lppr4;S386	Q7TME0;S386	-0.354672	0.742307	-1.45272	0.15365	0.92152
Lppr4;S549	Q7TME0;S549	0.992126	2.70669	1.37066	0.177683	0.92152
Lrfn2;S742	Q80TG9;S742	-0.533382	-0.867656	-1.27716	0.208483	0.92152
Lrrc7;S972	Q80TE7;S972	-0.533636	-1.04301	-1.57372	0.122972	0.92152
Lsm14a;S192	Q8K2F8;S192	0.574703	2.94642	1.29359	0.202799	0.92152
Lysmd2;S201	Q9D7V2;S201	-0.651317	-0.723506	-1.44252	0.156492	0.92152
Macf1;S4458	Q9QXZ0;S4458	-0.402944	1.4814	-1.35055	0.183992	0.92152
Madd;S920	Q80U28;S920	2.52208	-2.09769	1.52447	0.134803	0.92152
Mag;S547	P20917;S547	0.729642	0.4307	1.36636	0.179018	0.92152
Magi2;S1013	Q9WVQ1;S1013	-0.457772	-0.573201	-1.41422	0.164586	0.92152
Map1a;S1052	Q9QYR6;S1052	0.634022	-1.22587	1.59283	0.118615	0.92152
Map1a;S114	Q9QYR6;S114	1.01517	1.42467	1.52026	0.135856	0.92152
Map1a;S117	Q9QYR6;S117	0.651472	-0.429778	1.37481	0.176399	0.92152
Map1a;S1267	Q9QYR6;S1267	-0.770689	2.48595	-1.55103	0.128316	0.92152
Map1a;S1747	Q9QYR6;S1747	0.393736	1.26351	1.5748	0.122724	0.92152
Map1a;S2082	Q9QYR6;S2082	-0.508533	3.66117	-1.36363	0.179869	0.92152
Map1a;S2637	Q9QYR6;S2637	0.552748	2.11216	1.27855	0.207998	0.92152
Map1a;S319	Q9QYR6;S319	2.40708	-1.47991	1.4362	0.15827	0.92152
Map1a;S644	Q9QYR6;S644	-0.784217	1.98586	-1.26438	0.21299	0.92152
Map1a;S667	Q9QYR6;S667	-0.877374	3.7382	-1.29574	0.202063	0.92152
Map1a;S995	Q9QYR6;S995	-1.02491	0.673356	-1.4841	0.145166	0.92152
Map1a;T2064	Q9QYR6;T2064	-2.41352	1.42211	-1.34464	0.185878	0.92152
Map1b;S1438	P14873;S1438	-1.41429	6.3968	-1.42802	0.160598	0.92152
Map1b;S2094	P14873;S2094	-1.68589	4.93695	-1.32712	0.191559	0.92152
Map1b;S561	P14873;S561	1.7288	-1.1555	1.35515	0.182535	0.92152
Map1b;S829	P14873;S829	1.00333	2.99466	1.3152	0.195499	0.92152
Map1b;S885	P14873;S885	-1.04194	3.24547	-1.4092	0.166058	0.92152
Map1b;T1784	P14873;T1784	1.21307	-0.189667	1.368	0.178507	0.92152
Map1b;T1928	P14873;T1928	0.510185	4.35752	1.41046	0.165686	0.92152
Map2;S1352	P20357;S1352	-0.622396	5.5362	-1.43068	0.159839	0.92152
Map2;S140	P20357;S140	1.27282	4.30541	1.4921	0.143064	0.92152
Map2;S1635	P20357;S1635	-0.516897	0.774639	-1.29457	0.202462	0.92152
Map2;S1787	P20357;S1787	0.872045	0.999507	1.35873	0.181406	0.92152
Map2;S603	P20357;S603	0.512769	0.0804705	1.31355	0.19605	0.92152
Map2;S737	P20357;S737	0.965384	2.48525	1.51176	0.138	0.92152
Map2;S823	P20357;S823	-0.958046	-0.547909	-1.62605	0.111338	0.92152
Map2;S915	P20357;S915	-0.857175	-1.26411	-1.50498	0.139731	0.92152
Map2;T1445	P20357;T1445	1.38655	-2.83651	1.35946	0.181175	0.92152
Map2;T1632	P20357;T1632	-0.557642	-0.258751	-1.32158	0.193382	0.92152
Map4;T847	P27546;T847	-0.439595	1.33002	-1.44542	0.155679	0.92152
Map4k3;S398	Q99JP0;S398	-0.876042	-1.45628	-1.2982	0.201225	0.92152
Map6d1;S154	Q14BB9;S154	1.28252	0.314628	1.49972	0.141084	0.92152
Map7d1;S256	A2AJI0;S256	-0.423398	-2.5617	-1.39662	0.169786	0.92152
Map7d1;S34	A2AJI0;S34	0.904199	-0.256497	1.43632	0.158237	0.92152
Map7d1;T49	A2AJI0;T49	0.825786	-0.00155965	1.36242	0.180248	0.92152
Map7d2;S315	A2AG50;S315	0.74166	1.84322	1.31655	0.19505	0.92152
Map9;S414	Q3TRR0;S414	0.569311	-0.0328557	1.26499	0.212771	0.92152
Mapk8;S179	Q91Y86;S179	1.12713	-0.762385	1.60108	0.116773	0.92152
Mapk8ip3;S1192	Q9ESN9;S1192	-0.422613	3.28257	-1.32404	0.192573	0.92152
Mapk8ip3;S366	Q9ESN9;S366	0.462833	2.94854	1.26425	0.213034	0.92152
Mapk8ip3;S586	Q9ESN9;S586	-0.711674	0.16319	-1.37042	0.177756	0.92152
Mapt;S705	P10637;S705	1.46153	1.6195	1.41469	0.16445	0.92152
Marcks;S138	P26645;S138	0.439713	3.45675	1.46802	0.149465	0.92152
Marcksl1;S22	P28667;S22	-0.387755	3.22984	-1.52015	0.135885	0.92152
Marf1;S1081	Q8BJ34;S1081	-0.534417	-1.62849	-1.37765	0.175529	0.92152
Mark1;S403	Q8VHJ5;S403	0.507976	2.01123	1.43508	0.158588	0.92152
Mark2;S408	Q05512;S408	-0.426602	-0.241449	-1.53947	0.131107	0.92152
Mark2;S566	Q05512;S566	-0.677617	1.25207	-1.62294	0.112002	0.92152
Mast3;S1151	Q3U214;S1151	-0.788579	1.91514	-1.28841	0.204579	0.92152
Mast3;S702	Q3U214;S702	-0.362926	1.57423	-1.37162	0.177385	0.92152
Mat2b;S282	Q99LB6;S282	0.760841	1.48623	1.39751	0.169518	0.92152
Matr3;S604	Q8K310;S604	1.80529	-0.905362	1.53723	0.131655	0.92152
Mbp;S206	P04370;S206	1.39883	2.54449	1.45466	0.153116	0.92152
Mcf2l;S973	Q64096;S973	0.552691	-1.10737	1.41214	0.165195	0.92152
Mcf2l;S976	Q64096;S976	-0.581901	0.0241865	-1.27427	0.209496	0.92152
Mdh1;T190	P14152;T190	-0.394295	-1.22481	-1.33167	0.190071	0.92152
Mef2a;S485	Q60929;S485	-0.473092	-0.920202	-1.54613	0.129492	0.92152
Mff;T89	Q6PCP5;T89	0.540303	4.52539	1.34817	0.18475	0.92152
Mfsd8;S18	Q8BH31;S18	0.590708	-1.33281	1.33229	0.189869	0.92152
Mical3;S1365	Q8CJ19;S1365	-0.353257	0.536858	-1.33127	0.190201	0.92152
Mical3;S1736	Q8CJ19;S1736	0.717354	-0.683461	1.5365	0.131834	0.92152
Mief1;S94	Q8BGV8;S94	-0.681163	-0.753308	-1.48507	0.14491	0.92152
Mkrn2;S139	Q9ERV1;S139	0.472262	-0.432737	1.30954	0.197392	0.92152
Mlf2;S151	Q99KX1;S151	-0.43678	-2.34273	-1.30867	0.197683	0.92152
Mlf2;S237	Q99KX1;S237	-0.374572	0.251697	-1.39589	0.170001	0.92152
Mllt4;S1719	Q9QZQ1;S1719	0.976863	-1.21351	1.54563	0.129614	0.92152
Mobp;S85	Q9D2P8;S85	0.53646	2.1202	1.37657	0.175861	0.92152
Mprip;S976	P97434;S976	-0.603225	0.711312	-1.33065	0.190406	0.92152
Mtch1;S381	Q791T5;S381	0.72623	-2.22979	1.41043	0.165694	0.92152
Mtmr1;S47	Q9Z2C4;S47	-0.417241	2.73608	-1.30819	0.197846	0.92152
Mtmr2;S6	Q9Z2D1;S6	-0.982898	0.145406	-1.32295	0.192932	0.92152
Mvb12b;S199	Q6KAU4;S199	-0.600581	0.607034	-1.27724	0.208457	0.92152
Mycbp2;T3992	Q7TPH6;T3992	-0.555523	0.204727	-1.30666	0.198361	0.92152
Myl12b;T19	Q3THE2;T19	-0.72992	-1.71673	-1.31008	0.197212	0.92152
Myt1l;S865	P97500;S865	-0.598629	-1.16492	-1.57248	0.12326	0.92152
Nav1;S1824	Q8CH77;S1824	-0.729605	0.680891	-1.36187	0.18042	0.92152
Nav1;S493	Q8CH77;S493	0.593382	-0.460158	1.56315	0.12544	0.92152
Nbea;S1004	Q9EPN1;S1004	0.627435	-1.37429	1.60681	0.115507	0.92152
Ncam1;S946	P13595;S946	0.45827	1.23065	1.60016	0.116977	0.92152
Ncam2;S786	O35136;S786	-0.458791	1.30594	-1.46182	0.151151	0.92152
Ncdn;S448	Q9Z0E0;S448	0.487537	3.43945	1.46325	0.150762	0.92152
Nckipsd;T174	Q9ESJ4;T174	0.446627	2.69863	1.30788	0.197949	0.92152
Ncl;S577	P09405;S577	-0.532852	-1.58182	-1.57147	0.123494	0.92152
Ncoa5;S378	Q91W39;S378	-0.493576	-0.426422	-1.41135	0.165424	0.92152
Ncoa7;S612	Q6DFV7;S612	-0.535835	-1.35849	-1.38945	0.171937	0.92152
Ncor1;S2165	Q60974;S2165	-0.424424	-0.32116	-1.29925	0.200867	0.92152
Ndel1;S194	Q9ERR1;S194	0.400131	0.31756	1.31911	0.1942	0.92152
Ndrg2;S332	Q9QYG0;S332	-0.454384	3.6925	-1.26646	0.21225	0.92152
Ndrg2;T348	Q9QYG0;T348	0.693057	2.28499	1.38731	0.172585	0.92152
Nedd4l;S516	Q8CFI0;S516	0.477308	-0.245392	1.267	0.212059	0.92152
Nefh;S429	P19246;S429	-0.509327	-2.40296	-1.39644	0.169837	0.92152
Nefh;S535	P19246;S535	0.716973	0.97855	1.32669	0.1917	0.92152
Nefh;S541	P19246;S541	0.711448	0.983419	1.32117	0.19352	0.92152
Nefh;S571	P19246;S571	1.65653	0.132465	1.29628	0.20188	0.92152
Nefh;S583	P19246;S583	0.784538	0.693999	1.47537	0.14749	0.92152
Nefh;S589	P19246;S589	0.616399	-0.167066	1.62859	0.110796	0.92152
Nefh;S595	P19246;S595	1.09796	-0.997649	1.30194	0.199954	0.92152
Nefh;S631	P19246;S631	0.462117	1.2302	1.42623	0.161111	0.92152
Nefh;S703	P19246;S703	0.804298	1.48895	1.36123	0.18062	0.92152
Nefh;S727	P19246;S727	0.6185	1.82707	1.47921	0.146463	0.92152
Nefh;S763	P19246;S763	0.467103	4.11378	1.4114	0.165411	0.92152
Nefh;S888	P19246;S888	0.823778	-0.421652	1.53544	0.132092	0.92152
Nefm;S30	P08553;S30	0.778482	1.07052	1.33881	0.187756	0.92152
Nefm;S723	P08553;S723	0.775752	0.588349	1.41154	0.16537	0.92152
Nf1;S2545	Q04690;S2545	-0.484798	2.06978	-1.45687	0.152505	0.92152
Nf1;S866	Q04690;S866	-0.709411	0.220238	-1.40254	0.16802	0.92152
Nfasc;S1231	Q810U3;S1231	0.85417	-0.450964	1.58081	0.121341	0.92152
Nfic;S323	P70255;S323	-0.856547	-3.36041	-1.4334	0.159065	0.92152
Ngef;S606	Q8CHT1;S606	-0.489165	1.59549	-1.43537	0.158506	0.92152
Nop56;S513	Q9D6Z1;S513	-0.529291	0.961941	-1.3394	0.187566	0.92152
Nop58;S521	Q6DFW4;S521	-0.342774	1.18832	-1.2901	0.203998	0.92152
Nos1;S283	Q9Z0J4;S283	-0.63851	-0.983976	-1.46743	0.149626	0.92152
Nos1;S293	Q9Z0J4;S293	-0.713039	-0.34244	-1.45413	0.15326	0.92152
Nos1ap;S413	Q9D3A8;S413	-0.733594	1.56097	-1.55425	0.127547	0.92152
Nppb;S111	P40753;S111	0.590598	1.689	1.48165	0.145815	0.92152
Nr2c2;S351	P49117;S351	-0.420065	-2.66504	-1.34641	0.185313	0.92152
Nrcam;S1254	Q810U4;S1254	-1.18214	-0.894498	-1.60294	0.116361	0.92152
Nsf;S207	P46460;S207	-0.38129	1.0735	-1.32587	0.191969	0.92152
Nsmf;S206	Q99NF2;S206	-0.67863	0.651841	-1.55239	0.12799	0.92152
Nsmf;S82	Q99NF2;S82	-0.73664	1.7576	-1.56702	0.12453	0.92152
Nudt11;S148	P0C028;S148	0.549604	-1.61343	1.29468	0.202426	0.92152
Nufip2;S649	Q5F2E7;S649	-0.310154	-0.754598	-1.36993	0.177908	0.92152
Numa1;S398	E9Q7G0;S398	0.697471	-0.76735	1.63766	0.108881	0.92152
Numbl;S317	O08919;S317	-0.560309	-0.617436	-1.42289	0.162072	0.92152
Numbl;S411	O08919;S411	0.538301	-2.6412	1.35631	0.182167	0.92152
Nup160;S1123	Q9Z0W3;S1123	0.549514	-1.15022	1.61243	0.114276	0.92152
Nup210;S1852	Q9QY81;S1852	-0.614744	-0.853151	-1.5392	0.131174	0.92152
Nyap2;S538	Q8BM65;S538	0.750754	-1.7348	1.36244	0.180241	0.92152
Osbp;S238	Q3B7Z2;S238	-0.520043	-0.0114005	-1.6057	0.115751	0.92152
Pa2g4;S2	P50580;S2	1.07344	0.475961	1.54044	0.130873	0.92152
Pak1;T212	O88643;T212	0.902778	0.496023	1.45911	0.151892	0.92152
Pak2;S141	Q8CIN4;S141	-0.470418	0.835934	-1.43049	0.159892	0.92152
Palm2;S315	Q8BR92;S315	-0.754746	3.00633	-1.54808	0.129022	0.92152
Palmd;S278	Q9JHU2;S278	-0.41461	-0.708054	-1.28708	0.205036	0.92152
Paqr9;S33	Q6TCG2;S33	0.48841	-1.7632	1.30674	0.198334	0.92152
Pard3b;S140	Q9CSB4;S140	-0.673959	-0.588811	-1.54286	0.130284	0.92152
Parg;S135	O88622;S135	-0.582026	-2.224	-1.38162	0.174314	0.92152
Pcdh19;S1063	Q80TF3;S1063	0.733428	-2.47883	1.28043	0.207344	0.92152
Pclo;S1332	Q9QYX7;S1332	0.696507	-0.549987	1.27914	0.207792	0.92152
Pclo;S1709	Q9QYX7;S1709	0.717336	3.35303	1.38769	0.172469	0.92152
Pclo;S1800	Q9QYX7;S1800	0.594226	-1.35693	1.26737	0.211929	0.92152
Pclo;S3558	Q9QYX7;S3558	0.970445	-0.060793	1.48211	0.145693	0.92152
Pclo;S3610	Q9QYX7;S3610	-0.377646	2.21858	-1.54168	0.13057	0.92152
Pclo;S3763	Q9QYX7;S3763	-0.615714	2.87556	-1.31376	0.19598	0.92152
Pclo;S4066	Q9QYX7;S4066	-0.664894	0.388498	-1.275	0.20924	0.92152
Pclo;S4398	Q9QYX7;S4398	0.653613	0.254029	1.3873	0.172588	0.92152
Pclo;S4522	Q9QYX7;S4522	-0.896371	-0.993788	-1.5663	0.1247	0.92152
Pclo;S4524	Q9QYX7;S4524	-0.888785	-1.03805	-1.51207	0.137922	0.92152
Pde1a;S3	Q61481;S3	0.74101	-1.51259	1.42785	0.160647	0.92152
Pex5l;S388	Q8C437;S388	-0.351096	0.952563	-1.30284	0.199648	0.92152
Pfkl;S775	P12382;S775	-0.382382	4.26286	-1.63373	0.109708	0.92152
Pgam1;S118	Q9DBJ1;S118	-0.402931	-1.92647	-1.28119	0.207079	0.92152
Pgrmc1;S181	O55022;S181	-0.466537	6.40827	-1.6097	0.114872	0.92152
Phactr4;S620	Q501J7;S620	-0.612317	-1.66431	-1.44265	0.156453	0.92152
Pik3r2;S119	O08908;S119	0.633896	-1.15799	1.39076	0.171544	0.92152
Pikfyve;S23	Q9Z1T6;S23	-0.728191	-0.803762	-1.28433	0.20599	0.92152
Pikfyve;T34	Q9Z1T6;T34	-0.815314	-0.882711	-1.39022	0.171706	0.92152
Pitpnm3;S319	Q3UHE1;S319	0.447135	-1.03441	1.41845	0.163355	0.92152
Pitpnm3;S495	Q3UHE1;S495	-0.434025	-1.47834	-1.43337	0.159074	0.92152
Pitpnm3;S928	Q3UHE1;S928	0.545719	-0.181544	1.28926	0.204285	0.92152
Pkm;S243	P52480;S243	0.517842	-4.56568	1.4008	0.168537	0.92152
Pkm;S519	P52480;S519	-0.61544	-2.83037	-1.4857	0.144743	0.92152
Pkm;T454	P52480;T454	0.492597	-1.57069	1.51574	0.136994	0.92152
Pkp4;S1133	Q68FH0;S1133	0.443901	0.126265	1.59761	0.117545	0.92152
Pkp4;S235	Q68FH0;S235	0.651899	-0.0675211	1.51698	0.136679	0.92152
Pkp4;S246	Q68FH0;S246	0.929518	0.689789	1.54172	0.130561	0.92152
Pkp4;S326	Q68FH0;S326	0.743126	1.08167	1.60127	0.116731	0.92152
Pkp4;S511	Q68FH0;S511	0.850685	2.54129	1.62982	0.110536	0.92152
Pkp4;S775	Q68FH0;S775	0.427253	-1.65159	1.35756	0.181773	0.92152
Pkp4;T1016	Q68FH0;T1016	-0.495146	-0.576838	-1.43417	0.158846	0.92152
Plcb1;S1197	Q9Z1B3;S1197	0.577106	2.15223	1.29642	0.201832	0.92152
Plch2;S662	A2AP18;S662	0.637774	-0.537787	1.5617	0.125781	0.92152
Plch2;T983	A2AP18;T983	0.745719	1.11631	1.49592	0.142069	0.92152
Plcl1;T557	Q3USB7;T557	0.806475	1.01399	1.35245	0.18339	0.92152
Plcl2;S124	Q8K394;S124	0.493835	-2.02373	1.38739	0.172561	0.92152
Plekha6;S864	Q7TQG1;S864	0.54159	0.796964	1.5419	0.130516	0.92152
Plekha6;S901	Q7TQG1;S901	0.401824	0.703956	1.43391	0.158919	0.92152
Plekhm2;S423	Q80TQ5;S423	0.665551	0.250044	1.27058	0.210795	0.92152
Poldip3;S127	Q8BG81;S127	-0.844807	-1.23588	-1.33839	0.18789	0.92152
Ppfia2;S260	Q8BSS9;S260	0.502197	0.918043	1.38894	0.172091	0.92152
Ppm1e;S545	Q80TL0;S545	-1.27263	3.22378	-1.33462	0.189111	0.92152
Ppme1;S243	Q8BVQ5;S243	0.71396	1.82647	1.44819	0.154906	0.92152
Ppp1ca;T320	P62137;T320	0.438813	0.512258	1.42508	0.161442	0.92152
Ppp1r12b;S29	Q8BG95;S29	-0.531793	-0.77182	-1.26982	0.211064	0.92152
Ppp1r14a;S136	Q91VC7;S136	-0.833252	-1.47918	-1.43355	0.159022	0.92152
Ppp1r16a;S379	Q923M0;S379	-0.536374	0.70895	-1.51548	0.137059	0.92152
Ppp1r1a;S46	Q9ERT9;S46	0.777581	1.26629	1.27031	0.210888	0.92152
Ppp1r1a;S47	Q9ERT9;S47	0.937322	2.08339	1.285	0.205755	0.92152
Ppp1r1b;S46	Q60829;S46	0.64123	1.8652	1.47224	0.148329	0.92152
Ppp2r5c;S497	Q60996;S497	1.02664	-3.17788	1.32368	0.192692	0.92152
Ppp3cb;S411	P63328;S411	1.12066	1.65774	1.34767	0.18491	0.92152
Ppp3cc;S462	P48455;S462	0.72618	-0.607419	1.41371	0.164736	0.92152
Ppp4r4;S805	Q8C0Y0;S805	0.538	-1.29031	1.40158	0.168306	0.92152
Prdx5;S167	P99029;S167	0.405121	-2.44453	1.40465	0.167396	0.92152
Prdx6;T44	O08709;T44	-0.435305	-2.55482	-1.50768	0.139039	0.92152
Prdx6;T93	O08709;T93	-0.782817	-2.67015	-1.64187	0.108003	0.92152
Prickle1;S682	Q3U5C7;S682	-0.468074	-2.62694	-1.4255	0.16132	0.92152
Prickle1;S684	Q3U5C7;S684	-0.495164	-2.60429	-1.51068	0.138275	0.92152
Prkar1b;S83	P12849;S83	-0.586274	-0.532367	-1.40953	0.16596	0.92152
Prkar1b;S9	P12849;S9	-0.381366	-0.323385	-1.52015	0.135884	0.92152
Prkcd;S643	P28867;S643	-0.619118	2.30858	-1.2911	0.203654	0.92152
Prkcg;S342	P63318;S342	0.423839	-2.7113	1.5848	0.120431	0.92152
Prkcg;S70	P63318;S70	-0.988531	-2.07426	-1.35129	0.183756	0.92152
Prkcg;T689	P63318;T689	1.34199	0.384738	1.58959	0.119346	0.92152
Prkci;T411	Q62074;T411	0.627865	-0.511206	1.57245	0.123266	0.92152
Prkra;S18	Q9WTX2;S18	-0.28696	0.568657	-1.29002	0.204023	0.92152
Prrt3;S791	Q6PE13;S791	1.07218	-0.880366	1.27717	0.208481	0.92152
Prrt3;S799	Q6PE13;S799	0.397258	4.4196	1.61004	0.114797	0.92152
Prrt3;S845	Q6PE13;S845	-0.836396	2.81921	-1.50986	0.138483	0.92152
Prrt3;S865	Q6PE13;S865	0.944757	0.275801	1.54837	0.128953	0.92152
Prrt3;S965	Q6PE13;S965	-0.739496	-0.877068	-1.63293	0.109876	0.92152
Psip1;S129	Q99JF8;S129	0.876851	2.65514	1.41768	0.163579	0.92152
Psip1;T122	Q99JF8;T122	-0.544314	2.26081	-1.55894	0.126431	0.92152
Psmd11;S23	Q8BG32;S23	-0.649443	-1.75641	-1.58516	0.120349	0.92152
Psmd4;T250	O35226;T250	0.632792	-0.765842	1.45428	0.153219	0.92152
Ptbp2;S308	Q91Z31;S308	-1.18685	1.85528	-1.40647	0.166859	0.92152
Ptpn1;S335	P35821;S335	-0.520864	-0.836519	-1.62988	0.110521	0.92152
Ptpn12;S434	P35831;S434	-0.348209	-1.85718	-1.32827	0.191184	0.92152
Ptpn12;S448	P35831;S448	-0.598676	-0.252694	-1.39756	0.169505	0.92152
Ptpra;Y825	P18052;Y825	0.374409	-3.12767	1.29551	0.202142	0.92152
Ptprc;S964	P06800;S964	-0.522182	-0.208842	-1.28573	0.205503	0.92152
Ptprn2;S423	P80560;S423	1.06033	1.83618	1.61107	0.114573	0.92152
Ptprz1;S1680	B9EKR1;S1680	0.740938	-1.57023	1.45632	0.152659	0.92152
Pts;S27	Q9R1Z7;S27	-0.41221	-1.59605	-1.56114	0.125912	0.92152
R3hdm2;S362	Q80TM6;S362	0.582731	0.261433	1.44589	0.155547	0.92152
Rab3c;S211	P62823;S211	0.418215	1.18555	1.30736	0.198123	0.92152
Rabgap1;S503	A2AWA9;S503	-0.606937	-1.35578	-1.35353	0.183045	0.92152
Rabl6;S483	Q5U3K5;S483	0.795376	-1.24134	1.28998	0.204037	0.92152
Rabl6;S594	Q5U3K5;S594	0.481446	2.4432	1.27813	0.208144	0.92152
Rabl6;T597	Q5U3K5;T597	0.583686	2.27436	1.27522	0.209163	0.92152
Rad23a;S123	P54726;S123	-1.00239	1.36348	-1.62889	0.110733	0.92152
Ralbp1;S29	Q62172;S29	-0.602306	0.0201749	-1.41969	0.162996	0.92152
Ralgapb;S420	Q8BQZ4;S420	-0.8733	0.699411	-1.49205	0.143077	0.92152
Ralgps2;S336	Q9ERD6;S336	-0.766983	-2.96384	-1.3449	0.185797	0.92152
Ranbp3;S33	Q9CT10;S33	0.710678	-0.154202	1.46642	0.1499	0.92152
Ranbp3;S40	Q9CT10;S40	0.757013	-0.150922	1.59577	0.117955	0.92152
Rap1gap;S515	A2ALS5;S515	0.585275	0.0756667	1.42816	0.160558	0.92152
Rapgef2;S1088	Q8CHG7;S1088	-0.566868	-1.10624	-1.26792	0.211734	0.92152
Rapgef2;S935	Q8CHG7;S935	0.570424	-0.977731	1.37665	0.175835	0.92152
Rasgrp2;S554	Q9QUG9;S554	0.664908	0.0317961	1.53252	0.132811	0.92152
Rbm15;S256	Q0VBL3;S256	0.458623	-0.0871285	1.36446	0.17961	0.92152
Rbm39;S136	Q8VH51;S136	-0.311655	4.58875	-1.39123	0.1714	0.92152
Rbm43;S141	Q99J64;S141	-0.607642	-1.15609	-1.42531	0.161375	0.92152
Rbm5;S59	Q91YE7;S59	0.526352	-0.451023	1.62292	0.112008	0.92152
Rbsn;S214	Q80Y56;S214	-0.802886	0.533165	-1.46679	0.1498	0.92152
Rem2;S69	Q8VEL9;S69	0.590603	-0.0179164	1.38963	0.171882	0.92152
Rgs6;S244	Q9Z2H2;S244	-0.444416	1.72246	-1.44971	0.154485	0.92152
Ric8a;T440	Q3TIR3;T440	0.783454	1.13316	1.57622	0.122396	0.92152
Ric8a;Y434	Q3TIR3;Y434	0.689434	-0.505311	1.53943	0.131117	0.92152
Rictor;S1301	Q6QI06;S1301	-0.426058	-0.495411	-1.37406	0.176631	0.92152
Rims1;S1451	Q99NE5;S1451	-0.702318	1.26443	-1.41848	0.163347	0.92152
Rims2;S522	Q9EQZ7;S522	-0.506109	2.38309	-1.64334	0.107697	0.92152
Rin1;S198	Q921Q7;S198	0.528955	-0.848495	1.45575	0.152814	0.92152
Rltpr;S1008	Q3V3V9;S1008	-0.594499	-0.316621	-1.35713	0.181909	0.92152
Rltpr;T1007	Q3V3V9;T1007	-0.605741	-0.301808	-1.4234	0.161924	0.92152
Rnf208;S103	Q8K0W3;S103	-0.787577	-0.737507	-1.44967	0.154495	0.92152
Rplp1;S101	P47955;S101	1.35618	1.51958	1.53737	0.131619	0.92152
Rplp1;S104	P47955;S104	1.25541	1.49742	1.41773	0.163565	0.92152
Rprd2;S504	Q6NXI6;S504	0.728464	-0.954346	1.61402	0.113929	0.92152
Rps6;S236	P62754;S236	0.934345	0.260241	1.5785	0.121872	0.92152
Rps6;S240	P62754;S240	0.943359	0.266304	1.59135	0.118947	0.92152
Rps6;T241	P62754;T241	0.607786	0.291003	1.3592	0.181256	0.92152
Rps6ka2;S377	Q9WUT3;S377	0.638187	-2.16278	1.37386	0.176692	0.92152
Rps6kc1;S599	Q8BLK9;S599	0.48649	-1.98165	1.34785	0.184852	0.92152
Rtn1;S70	Q8K0T0;S70	-0.844096	0.206764	-1.41653	0.163914	0.92152
Rtn3;S225	Q9ES97;S225	1.23472	0.92665	1.45165	0.153946	0.92152
Rtn3;S597	Q9ES97;S597	1.49121	0.400404	1.62938	0.110629	0.92152
Rufy3;T5	Q9D394;T5	-0.624421	-0.224124	-1.61032	0.114736	0.92152
Ryr2;S2813	E9Q401;S2813	-0.717683	1.42174	-1.49049	0.143485	0.92152
Ryr2;T1864	E9Q401;T1864	-0.474317	0.62779	-1.34846	0.184658	0.92152
Scamp1;S43	Q8K021;S43	-0.939622	0.778923	-1.63235	0.11	0.92152
Scg3;S40	P47867;S40	-0.883178	-1.43062	-1.47768	0.146872	0.92152
Scg5;S141	P12961;S141	-0.74603	0.7878	-1.34773	0.184891	0.92152
Scg5;S205	P12961;S205	-0.459673	1.52843	-1.38786	0.172418	0.92152
Scn1a;S550	A2APX8;S550	-0.955926	-2.30847	-1.54742	0.129181	0.92152
Scn2a1;S558	B1AWN6;S558	-0.935637	-0.755039	-1.52008	0.135901	0.92152
Scrib;S1548	Q80U72;S1548	0.648989	-1.14814	1.43174	0.159536	0.92152
Sde2;S269	Q8K1J5;S269	-0.496943	-0.980355	-1.63391	0.109669	0.92152
Sec16a;S2058	E9QAT4;S2058	-0.609955	-1.06035	-1.26874	0.211445	0.92152
Sec16a;S2063	E9QAT4;S2063	-0.50414	-1.66414	-1.59672	0.117742	0.92152
Sept2;S218	P42208;S218	-0.761898	6.69668	-1.54414	0.129975	0.92152
Sept4;S118	P28661;S118	0.984839	0.993385	1.59004	0.119243	0.92152
Sept4;S325	P28661;S325	0.652643	4.34851	1.54504	0.129756	0.92152
Sept9;S60	Q80UG5;S60	0.578797	-0.142992	1.44334	0.156261	0.92152
Sgip1;S149	Q8VD37;S149	-0.664322	3.09768	-1.3732	0.176896	0.92152
Sgip1;S27	Q8VD37;S27	0.802967	0.723476	1.40258	0.16801	0.92152
Sgip1;S398	Q8VD37;S398	-0.527536	2.41518	-1.3693	0.178103	0.92152
Sgip1;T182	Q8VD37;T182	1.08382	1.15759	1.31253	0.19639	0.92152
Sgsm2;S637	Q80U12;S637	0.567198	-0.508723	1.3538	0.18296	0.92152
Sgta;S307	Q8BJU0;S307	0.790665	-2.25147	1.31637	0.195109	0.92152
Sh3bp1;S535	P55194;S535	-0.521635	0.974738	-1.32348	0.192756	0.92152
Sh3kbp1;S631	Q8R550;S631	-0.693843	-0.0438275	-1.44611	0.155487	0.92152
Sh3pxd2a;S1047	O89032;S1047	0.428513	-1.23038	1.32053	0.19373	0.92152
Sh3pxd2b;S528	A2AAY5;S528	-0.960759	-2.47391	-1.34101	0.187045	0.92152
Sh3rf1;S741	Q69ZI1;S741	0.947555	-1.21352	1.56932	0.123996	0.92152
Shank1;S869	D3YZU1;S869	-0.622659	-1.2429	-1.43166	0.15956	0.92152
Shank2;S729	Q80Z38;S729	-0.93276	1.91073	-1.2912	0.203618	0.92152
Shank3;S1438	Q4ACU6;S1438	0.7351	1.15935	1.56568	0.124845	0.92152
Shank3;S1510	Q4ACU6;S1510	0.627455	-1.60168	1.32428	0.192493	0.92152
Shank3;S373	Q4ACU6;S373	-0.499052	-2.13745	-1.42352	0.161891	0.92152
Shank3;S801	Q4ACU6;S801	-1.3648	-0.124948	-1.30863	0.197696	0.92152
Shc3;S359	Q61120;S359	-0.498728	-1.21198	-1.37993	0.174831	0.92152
Shisa6;S450	Q3UH99;S450	0.915369	-3.12243	1.62164	0.112281	0.92152
Shisa6;T252	Q3UH99;T252	-0.26837	3.14482	-1.36119	0.180631	0.92152
Shisa6;T458	Q3UH99;T458	-0.499737	-2.64077	-1.30214	0.199888	0.92152
Shisa6;T502	Q3UH99;T502	-0.681917	0.828586	-1.35115	0.183802	0.92152
Shisa7;S287	Q8C3Q5;S287	-0.711533	1.05824	-1.26977	0.21108	0.92152
Shroom2;S1043	A2ALU4;S1043	0.710475	0.139036	1.44109	0.156891	0.92152
Sik3;S533	Q6P4S6;S533	1.54584	-0.639602	1.39098	0.171478	0.92152
Sipa1l1;S1116	Q8C0T5;S1116	-0.588822	1.60081	-1.44971	0.154485	0.92152
Sipa1l1;S1372	Q8C0T5;S1372	-0.545023	-0.770287	-1.48948	0.14375	0.92152
Sipa1l1;S1611	Q8C0T5;S1611	-0.577722	-1.80699	-1.40366	0.16769	0.92152
Sipa1l1;S162	Q8C0T5;S162	0.547137	-1.75515	1.33226	0.189879	0.92152
Sipa1l1;S318	Q8C0T5;S318	-0.560357	-0.719979	-1.53763	0.131558	0.92152
Sipa1l1;S97	Q8C0T5;S97	-0.559691	-1.51873	-1.54178	0.130546	0.92152
Sipa1l2;S1591	Q80TE4;S1591	0.48861	-0.890424	1.4536	0.153408	0.92152
Slain2;S87	Q8CI08;S87	0.545981	-1.82239	1.26453	0.212935	0.92152
Slc12a5;S1047	Q91V14;S1047	0.706497	0.871717	1.35307	0.183191	0.92152
Slc12a5;S960	Q91V14;S960	-0.529798	0.615438	-1.33546	0.188841	0.92152
Slc12a5;T1029	Q91V14;T1029	-0.469794	-1.32598	-1.343	0.186404	0.92152
Slc22a17;T396	Q9D9E0;T396	0.844489	-3.16499	1.34845	0.184661	0.92152
Slc25a4;S42	P48962;S42	0.492987	-1.95695	1.54894	0.128817	0.92152
Slc2a13;S17	Q3UHK1;S17	-0.518351	-1.94733	-1.48337	0.14536	0.92152
Slc2a13;S6	Q3UHK1;S6	-0.41527	1.28705	-1.5263	0.13435	0.92152
Slc2a3;T232	P32037;T232	0.785354	-1.44476	1.28414	0.206053	0.92152
Slc43a2;S552	Q8CGA3;S552	0.364306	2.13972	1.32872	0.191037	0.92152
Slc6a7;S22	Q6PGE7;S22	0.872073	-1.33437	1.59552	0.118012	0.92152
Slc6a7;T20	Q6PGE7;T20	0.815697	-1.26963	1.46655	0.149864	0.92152
Slc7a14;S769	Q8BXR1;S769	-0.477301	2.34631	-1.3777	0.175511	0.92152
Smarcad1;S127	Q04692;S127	0.439823	-1.7296	1.43628	0.158248	0.92152
Smim13;S61	E9Q942;S61	0.666702	0.189858	1.33953	0.187521	0.92152
Snap29;S65	Q9ERB0;S65	-0.496851	-2.09793	-1.41224	0.165166	0.92152
Snap91;S313	Q61548;S313	-0.590509	0.992931	-1.39014	0.171728	0.92152
Snapin;T14	Q9Z266;T14	0.573115	-0.97001	1.53405	0.132434	0.92152
Snrk;S390	Q8VDU5;S390	-0.523352	0.105721	-1.35875	0.1814	0.92152
Snx3;S72	O70492;S72	0.633252	-1.52923	1.47604	0.147311	0.92152
Sobp;S627	Q0P5V2;S627	-0.495001	-0.625979	-1.34704	0.185113	0.92152
Sorbs2;S358	Q3UTJ2;S358	-0.635746	0.429624	-1.51031	0.13837	0.92152
Sorbs2;S633	Q3UTJ2;S633	0.60121	-1.86434	1.4105	0.165674	0.92152
Sowaha;S258	Q8BLS7;S258	-1.08739	0.335413	-1.43107	0.159729	0.92152
Speg;S2114	Q62407;S2114	0.789801	0.188249	1.39552	0.170112	0.92152
Spire1;S247	Q52KF3;S247	0.591177	-1.86145	1.37896	0.175126	0.92152
Sptbn1;S2159	Q62261;S2159	-0.979376	2.89357	-1.35089	0.183885	0.92152
Sptbn1;S2163	Q62261;S2163	1.51671	3.5214	1.41278	0.165008	0.92152
Sptbn1;S2164	Q62261;S2164	1.42989	3.23082	1.55442	0.127505	0.92152
Sptbn1;S2168	Q62261;S2168	0.67535	4.11426	1.35095	0.183865	0.92152
Srcin1;S247	Q9QWI6;S247	0.537097	-2.22632	1.38798	0.172383	0.92152
Srcin1;S366	Q9QWI6;S366	0.832612	-0.566304	1.61411	0.11391	0.92152
Srcin1;S46	Q9QWI6;S46	0.702571	1.72558	1.27757	0.208339	0.92152
Srcin1;S579	Q9QWI6;S579	0.607395	2.67222	1.61392	0.113952	0.92152
Srcin1;S588	Q9QWI6;S588	1.09527	2.76911	1.53868	0.131301	0.92152
Srcin1;S974	Q9QWI6;S974	-0.589157	1.70722	-1.39366	0.17067	0.92152
Srgap2;S994	Q91Z67;S994	-0.575242	0.498132	-1.43777	0.157827	0.92152
Srgap3;S948	Q812A2;S948	-1.04341	-0.0206286	-1.2972	0.201566	0.92152
Srpk1;T448	O70551;T448	0.509591	-1.23933	1.61409	0.113914	0.92152
Srrm1;S391	Q52KI8;S391	0.433236	0.878916	1.59154	0.118905	0.92152
Srrm1;S915	Q52KI8;S915	0.444286	1.45062	1.35148	0.183696	0.92152
Srrm2;S1230	Q8BTI8;S1230	0.681038	0.215884	1.44333	0.156264	0.92152
Srrm2;S1284	Q8BTI8;S1284	-0.846524	-1.74698	-1.30012	0.200571	0.92152
Srrm2;S1339	Q8BTI8;S1339	-0.92922	1.04713	-1.6144	0.113848	0.92152
Srrm2;S533	Q8BTI8;S533	-0.575753	0.659294	-1.51764	0.136513	0.92152
Srrm2;T2268	Q8BTI8;T2268	-0.553571	-2.86107	-1.41301	0.164939	0.92152
Ssh2;S461	Q5SW75;S461	0.405127	0.668797	1.33005	0.190601	0.92152
Ssrp1;S444	Q08943;S444	0.900497	1.98748	1.28958	0.204177	0.92152
Stim1;S519	P70302;S519	-0.594535	-1.36416	-1.57274	0.1232	0.92152
Stim2;S609	P83093;S609	-0.66525	-1.30099	-1.42989	0.160064	0.92152
Stk39;S397	Q9Z1W9;S397	0.553265	1.23541	1.55689	0.126917	0.92152
Stmn2;S62	P55821;S62	-0.40385	2.14518	-1.2736	0.209733	0.92152
Stmn3;S68	O70166;S68	-0.635687	-0.208482	-1.35458	0.182713	0.92152
Strada;S313	Q3UUJ4;S313	0.618318	-0.56067	1.42199	0.162333	0.92152
Strip1;S335	Q8C079;S335	-0.432046	2.71813	-1.39813	0.169332	0.92152
Stx1a;S14	O35526;S14	0.851258	2.56671	1.54652	0.129399	0.92152
Stx1b;S10	P61264;S10	0.81189	0.0835942	1.49421	0.142513	0.92152
Stx1b;S108	P61264;S108	-0.554448	-1.43787	-1.34221	0.186658	0.92152
Suds3;S234	Q8BR65;S234	-0.55477	0.957958	-1.45311	0.153544	0.92152
Syn1;S341	O88935;S341	-0.786296	-0.858797	-1.48174	0.145792	0.92152
Syn1;S605	O88935;S605	1.5054	-0.380428	1.39366	0.170671	0.92152
Syn1;T241	O88935;T241	-0.552987	-1.12465	-1.52188	0.13545	0.92152
Syn2;S420	Q64332;S420	-1.2309	5.80332	-1.46029	0.151569	0.92152
Syn3;S483	Q8JZP2;S483	1.16263	0.46067	1.36005	0.180992	0.92152
Syn3;S9	Q8JZP2;S9	0.983049	0.0424142	1.61032	0.114737	0.92152
Syne1;S8284	Q6ZWR6;S8284	0.553079	-1.6576	1.32708	0.191573	0.92152
Syne1;T5654	Q6ZWR6;T5654	0.555485	-3.67689	1.37862	0.175231	0.92152
Syngap1;S1111	F6SEU4;S1111	-0.768805	3.38973	-1.44696	0.155249	0.92152
Syngap1;S765	F6SEU4;S765	1.54279	-0.503697	1.35885	0.181367	0.92152
Syngap1;S985	F6SEU4;S985	0.822774	2.61448	1.44994	0.15442	0.92152
Synj1;S1053	Q8CHC4;S1053	1.122	3.05684	1.42988	0.160066	0.92152
Synj1;S830	Q8CHC4;S830	-0.591222	-0.766051	-1.62984	0.110531	0.92152
Synpo;S507	Q8CC35;S507	0.872129	0.621025	1.64804	0.106725	0.92152
Synpo;S740	Q8CC35;S740	0.751896	-0.159652	1.4314	0.159633	0.92152
Synpo;S854	Q8CC35;S854	-0.411056	-0.703442	-1.37861	0.175233	0.92152
Syt17;S115	Q920M7;S115	0.599387	0.577118	1.36555	0.17927	0.92152
Syt7;S52	Q9R0N7;S52	0.72108	0.0765612	1.58528	0.12032	0.92152
Tanc2;S1534	A2A690;S1534	-0.909653	-0.129474	-1.27504	0.209227	0.92152
Tbc1d10b;T136	Q8BHL3;T136	-0.542594	2.39561	-1.28285	0.206503	0.92152
Tecpr1;S485	Q80VP0;S485	-0.432595	-2.46742	-1.27973	0.207587	0.92152
Terf2;S367	O35144;S367	-0.520647	-2.01225	-1.548	0.129042	0.92152
Tex2;S195	Q6ZPJ0;S195	-0.427958	0.110513	-1.35474	0.182665	0.92152
Tex2;S456	Q6ZPJ0;S456	0.531668	-2.31057	1.63436	0.109576	0.92152
Thrap3;S248	Q569Z6;S248	-0.518439	2.38114	-1.60354	0.116227	0.92152
Tjp1;S131	P39447;S131	1.02867	1.8927	1.61865	0.112926	0.92152
Tjp2;S107	Q9Z0U1;S107	-0.363775	2.47696	-1.36552	0.17928	0.92152
Tmem222;S7	Q8BVA2;S7	0.61485	-2.67824	1.5997	0.11708	0.92152
Tmem55a;S33	Q9CZX7;S33	-0.870065	0.450169	-1.57799	0.121989	0.92152
Tmem74;S11	Q8BQU7;S11	-0.525136	-0.214844	-1.48608	0.144645	0.92152
Tmem9b;S143	Q9JJR8;S143	-0.486316	-0.278405	-1.33883	0.187749	0.92152
Tmpo;T159	Q61029;T159	-1.08109	2.50274	-1.34398	0.18609	0.92152
Tmx1;S245	Q8VBT0;S245	-0.396351	4.45354	-1.63438	0.109572	0.92152
Tnik;S659	P83510;S659	0.828833	0.260968	1.60696	0.115474	0.92152
Tnik;S735	P83510;S735	-0.563259	1.11305	-1.57221	0.123324	0.92152
Tnks1bp1;S236	P58871;S236	-0.52984	0.230295	-1.40018	0.168723	0.92152
Tom1;S472	O88746;S472	-1.7188	1.2657	-1.36173	0.180462	0.92152
Top2b;S1400	Q64511;S1400	0.759647	0.561008	1.60858	0.115118	0.92152
Top2b;S1568	Q64511;S1568	0.935152	1.90071	1.46351	0.15069	0.92152
Tpd52;S175	Q62393;S175	-0.437846	2.69963	-1.58601	0.120156	0.92152
Tph2;S19	Q8CGV2;S19	-0.52577	2.14204	-1.27069	0.210757	0.92152
Tppp;S34	Q7TQD2;S34	1.11689	3.42628	1.28088	0.207185	0.92152
Tppp;T15	Q7TQD2;T15	0.691238	4.88094	1.59188	0.118829	0.92152
Tprn;S501	A2AI08;S501	0.646941	-0.768159	1.31139	0.196771	0.92152
Trappc10;S708	Q3TLI0;S708	-0.855017	3.279	-1.43548	0.158476	0.92152
Trappc9;S953	Q3U0M1;S953	-1.25209	-0.935782	-1.36562	0.179248	0.92152
Trim2;T371	Q9ESN6;T371	0.604859	-1.55894	1.33902	0.187686	0.92152
Trim28;S473	Q62318;S473	-1.42375	0.0424738	-1.63971	0.108454	0.92152
Trim9;T41	Q8C7M3;T41	-0.528117	1.20771	-1.4478	0.155014	0.92152
Trio;S2462	Q0KL02;S2462	0.816461	0.555485	1.49082	0.143399	0.92152
Trp53i11;S14	Q4QQM4;S14	2.31628	-2.43119	1.60127	0.11673	0.92152
Tsc1;S502	Q9EP53;S502	-0.676815	-2.54799	-1.46978	0.148992	0.92152
Ttc1;S69	Q91Z38;S69	-0.528391	3.39221	-1.61502	0.113713	0.92152
Tuba1b;S340	P05213;S340	1.03964	0.369669	1.46337	0.150727	0.92152
Tuba1b;T80	P05213;T80	0.644265	-0.885774	1.54911	0.128775	0.92152
Tubb4b;T312	P68372;T312	-1.08719	-3.83302	-1.4377	0.157848	0.92152
Tubgcp3;S513	P58854;S513	0.452411	-2.62276	1.32589	0.191963	0.92152
Ube2o;S833	Q6ZPJ3;S833	-0.659468	1.29072	-1.28408	0.206076	0.92152
Ubl7;S230	Q91W67;S230	1.06594	0.208776	1.32374	0.19267	0.92152
Ubr4;S2716	A2AN08;S2716	-0.495339	2.21656	-1.47195	0.148406	0.92152
Ubxn1;S200	Q922Y1;S200	-0.803027	0.0680922	-1.28268	0.206559	0.92152
Ubxn6;S36	Q99PL6;S36	1.20506	1.26033	1.41529	0.164275	0.92152
Uso1;S940	Q9Z1Z0;S940	1.01571	1.9032	1.35415	0.182849	0.92152
Usp21;S93	Q9QZL6;S93	0.682276	-2.08239	1.42303	0.162033	0.92152
Usp5;S783	P56399;S783	-0.87828	0.599885	-1.27603	0.208879	0.92152
Vamp4;S30	O70480;S30	1.57009	1.03514	1.61683	0.11332	0.92152
Vdac1;S254	Q60932;S254	-0.412743	-0.238709	-1.59217	0.118763	0.92152
Vim;S419	P20152;S419	0.887877	-2.36834	1.42918	0.160268	0.92152
Wdr44;S405	Q6NVE8;S405	-0.704125	3.09341	-1.46794	0.149487	0.92152
Wdr47;S559	Q8CGF6;S559	-0.700345	0.519785	-1.45036	0.154303	0.92152
Wfs1;T5	P56695;T5	-0.831531	1.08004	-1.28601	0.205408	0.92152
Wnk2;S1098	Q3UH66;S1098	0.634924	0.370832	1.45431	0.153212	0.92152
Zc3hc1;S353	Q80YV2;S353	-0.68127	0.998426	-1.46599	0.150017	0.92152
Zdhhc5;S380	Q8VDZ4;S380	-0.389309	0.398879	-1.34852	0.18464	0.92152
Zeb2;S1122	Q9R0G7;S1122	0.579669	-1.15738	1.41574	0.164142	0.92152
Zfhx3;T671	Q61329;T671	-0.565757	-0.221629	-1.4313	0.159661	0.92152
Zyx;S336	Q62523;S336	-0.674314	-0.374235	-1.58349	0.120729	0.92152
Ncor2;S2215	Q9WU42;S2215	-0.644505	-1.49711	-1.26341	0.213332	0.922197
Shank2;S586	Q80Z38;S586	-0.402731	1.47107	-1.26286	0.213527	0.92248
Hist1h1d;T18	P43277;T18	-0.418214	-0.9219	-1.26233	0.213719	0.922749
Epm2aip1;S147	Q8VEH5;S147	0.562076	-2.44153	1.26162	0.21397	0.923273
Aak1;S616	Q3UHJ0;S616	0.626609	0.229996	1.25836	0.215136	0.923863
Aldoc;S39	P05063;S39	-0.779766	-1.8552	-1.25265	0.217186	0.923863
Amot;S693	Q8VHG2;S693	0.395968	-0.292536	1.25526	0.216246	0.923863
Anln;S653	Q8K298;S653	0.973225	-0.0805765	1.25755	0.215426	0.923863
Arhgap23;S607	Q69ZH9;S607	-0.95502	-1.69036	-1.25144	0.217623	0.923863
Bsn;S3578	O88737;S3578	-0.46481	-1.03419	-1.25082	0.217848	0.923863
Cic;S1080	Q924A2;S1080	0.61251	-0.770927	1.25373	0.216796	0.923863
Cope;S10	O89079;S10	0.780876	0.205465	1.25767	0.215383	0.923863
Ctnnd2;S534	O35927;S534	0.500513	0.996836	1.25201	0.217418	0.923863
Dennd5b;S822	A2RSQ0;S822	-0.398664	-1.25918	-1.25005	0.218127	0.923863
Dtd1;S204	Q9DD18;S204	0.54872	0.36587	1.25236	0.217293	0.923863
Epn1;S450	Q80VP1;S450	0.570158	-1.11295	1.25581	0.216049	0.923863
Fam188b;S285	Q3UQI9;S285	0.521837	-2.35254	1.2501	0.218106	0.923863
Fam21;S388	Q6PGL7;S388	0.61396	0.151634	1.2509	0.217819	0.923863
Fat3;S900	Q8BNA6;S900	-0.605927	4.18288	-1.25109	0.21775	0.923863
Garem;S613	Q3UFT3;S613	-0.456878	-1.52113	-1.25808	0.215238	0.923863
Grm5;S1185	Q3UVX5;S1185	0.607037	0.571607	1.26029	0.214445	0.923863
Hcn2;S750	O88703;S750	0.885567	-0.143098	1.25548	0.216167	0.923863
Iqsec1;S923	Q8R0S2;S923	-0.445325	1.43981	-1.25239	0.217282	0.923863
Kcnq5;S467	Q9JK45;S467	0.276459	-2.51006	1.25668	0.215738	0.923863
Map1a;T633	Q9QYR6;T633	-0.507922	1.64392	-1.26084	0.214249	0.923863
Map1b;S1403	P14873;S1403	1.20863	1.57981	1.25375	0.216792	0.923863
Map2;S1545	P20357;S1545	-0.669211	-0.614076	-1.2588	0.214979	0.923863
Mapt;T695	P10637;T695	-1.51856	5.85199	-1.25209	0.217388	0.923863
Nfasc;S1226	Q810U3;S1226	0.82471	-1.26742	1.2551	0.216304	0.923863
Palm;T134	Q9Z0P4;T134	-0.778845	0.110077	-1.25031	0.218032	0.923863
Ppp1r1a;S43	Q9ERT9;S43	1.00147	-1.38103	1.25422	0.21662	0.923863
Rims1;S252	Q99NE5;S252	-0.665816	0.862643	-1.25319	0.216993	0.923863
Shank3;S1032	Q4ACU6;S1032	-0.568407	-1.86764	-1.25797	0.215275	0.923863
Sorbs2;S130	Q3UTJ2;S130	-0.580262	0.0676107	-1.25538	0.216203	0.923863
Srcin1;S374	Q9QWI6;S374	-0.747692	0.0447117	-1.25017	0.218081	0.923863
Coil;S171	Q5SU73;S171	0.560517	-1.28368	1.24675	0.21932	0.92414
Mical3;S1353	Q8CJ19;S1353	0.496812	-2.3126	1.24678	0.219311	0.92414
Prkar1a;S83	Q9DBC7;S83	-0.567625	3.06254	-1.24642	0.219441	0.92414
Psma5;T55	Q9Z2U1;T55	-0.533104	-1.05978	-1.24783	0.218931	0.92414
Sgsm1;S646	Q8BPQ7;S646	-0.529662	0.0095694	-1.24811	0.218829	0.92414
Slc9a3r1;S2	P70441;S2	-0.647055	-2.57753	-1.24911	0.218465	0.92414
Smarcc2;S283	Q6PDG5;S283	-0.514892	0.475006	-1.24806	0.218844	0.92414
Tecpr1;T486	Q80VP0;T486	-0.42913	-2.4966	-1.24913	0.218457	0.92414
Tmcc2;S75	Q80W04;S75	0.677573	-1.54038	1.2468	0.219302	0.92414
Tp53bp1;S552	P70399;S552	-0.300725	2.48194	-1.24629	0.21949	0.92414
Ddi2;S121	A2ADY9;S121	0.644478	-0.728687	1.24503	0.219947	0.924693
Slc6a17;S682	Q8BJI1;S682	-0.451711	2.07877	-1.24486	0.22001	0.924693
Svop;S25	Q8BFT9;S25	0.732191	2.21428	1.24525	0.219869	0.924693
Cacna1a;T433	P97445;T433	-1.17376	0.516118	-1.2435	0.220505	0.925112
Cadm2;S423	Q8BLQ9;S423	-0.367864	2.23689	-1.24382	0.220387	0.925112
Dennd4b;S930	Q3U1Y4;S930	0.420082	1.44231	1.24353	0.220495	0.925112
Pitpnm1;T1222	O35954;T1222	-0.453571	-0.187936	-1.24316	0.22063	0.925112
Ahctf1;T1224	Q8CJF7;T1224	-0.329439	-2.92444	-1.2368	0.222956	0.925163
Amfr;S509	Q9R049;S509	-0.607355	0.542864	-1.24061	0.22156	0.925163
Bclaf1;S529	Q8K019;S529	-0.246882	3.09579	-1.2364	0.223102	0.925163
Cadps2;S68	Q8BYR5;S68	-0.598391	-0.234226	-1.24059	0.221568	0.925163
Ctnnd2;S531	O35927;S531	0.474359	2.04827	1.23437	0.223851	0.925163
Dnaja1;S335	P63037;S335	0.464094	-2.35077	1.23812	0.222474	0.925163
Eef1g;S33	Q9D8N0;S33	-0.645122	-0.936129	-1.23357	0.224148	0.925163
Eif4b;S406	Q8BGD9;S406	-0.93867	0.93736	-1.24256	0.220845	0.925163
Kiaa1468;T143	Q148V7;T143	-0.759082	2.00607	-1.23945	0.221984	0.925163
Map1b;S1251	P14873;S1251	0.789269	1.90101	1.23935	0.22202	0.925163
Map1b;S2267	P14873;S2267	0.393614	2.40551	1.24152	0.221225	0.925163
Map4k5;S335	Q8BPM2;S335	-0.475348	-1.27198	-1.23386	0.224038	0.925163
Oxr1;S568	Q4KMM3;S568	-0.8141	-3.15127	-1.23835	0.222387	0.925163
Pclo;S1292	Q9QYX7;S1292	0.806745	1.304	1.24003	0.221771	0.925163
Plekhg5;S964	Q66T02;S964	0.500489	1.32015	1.23861	0.222293	0.925163
Prrt3;S806	Q6PE13;S806	-0.530718	0.677844	-1.23458	0.223773	0.925163
Ralgapb;S359	Q8BQZ4;S359	-0.432739	-0.0829097	-1.23773	0.222616	0.925163
Rin1;S612	Q921Q7;S612	0.439155	-2.58741	1.23463	0.223755	0.925163
Samd14;S140	Q8K070;S140	0.48266	-0.0822055	1.24191	0.221085	0.925163
Sgip1;S287	Q8VD37;S287	0.487262	4.219	1.2376	0.222665	0.925163
Slc6a15;S701	Q8BG16;S701	0.570184	-0.872159	1.23495	0.223638	0.925163
Ssfa2;S738	Q922B9;S738	-0.51761	-1.72105	-1.23763	0.222652	0.925163
Ssh3;S38	Q8K330;S38	-0.51315	0.283522	-1.23549	0.223438	0.925163
Synj1;S1160	Q8CHC4;S1160	0.309434	4.36442	1.2343	0.223877	0.925163
Synpo;T547	Q8CC35;T547	0.597034	-0.785626	1.23664	0.223015	0.925163
Tmem151a;S423	Q6GQT5;S423	0.38476	-2.60498	1.24104	0.221404	0.925163
Tnik;T905	P83510;T905	0.620526	-0.204209	1.23377	0.224072	0.925163
Ablim1;T586	Q8K4G5;T586	-0.440936	-0.142711	-1.21979	0.229273	0.92534
Acot1;S67	Q9QYR7;S67	-0.423449	-0.35829	-1.19546	0.238538	0.92534
Actb;S271	P63260;S271	0.56673	-2.17541	1.20105	0.236387	0.92534
Adam22;S832	Q9R1V6;S832	0.502037	1.52949	1.2115	0.2324	0.92534
Add3;S673	Q9QYB5;S673	-0.363661	2.98019	-1.18771	0.24155	0.92534
Add3;S677	Q9QYB5;S677	-0.910562	0.157675	-1.21748	0.230142	0.92534
Agap2;S802	Q3UHD9;S802	-0.610982	2.28494	-1.18402	0.242989	0.92534
Ank2;S1699	Q8C8R3;S1699	0.719583	1.82755	1.21343	0.23167	0.92534
Ank2;S1700	Q8C8R3;S1700	0.731639	1.8816	1.18652	0.242013	0.92534
Ank2;S31	Q8C8R3;S31	-0.237914	1.14081	-1.16986	0.248581	0.92534
Ank2;S3744	Q8C8R3;S3744	1.18678	1.49902	1.19116	0.240207	0.92534
Ank2;T3756	Q8C8R3;T3756	-0.631744	2.72909	-1.2027	0.235755	0.92534
Ap3d1;S685	O54774;S685	-0.528658	-0.0315896	-1.18793	0.241461	0.92534
Apba1;S84	B2RUJ5;S84	-0.523475	2.23606	-1.19382	0.239176	0.92534
Arfgef1;S52	G3X9K3;S52	0.388106	1.96651	1.18402	0.242991	0.92534
Arhgap20;S828	Q6IFT4;S828	-0.601422	-1.76566	-1.22225	0.228351	0.92534
Arhgef17;S414	Q80U35;S414	-0.554578	-0.855015	-1.16749	0.249526	0.92534
Armc1;S246	Q9D7A8;S246	0.786857	2.52082	1.18993	0.240684	0.92534
Armc10;S43	Q9D0L7;S43	-0.370105	2.80386	-1.20191	0.236056	0.92534
Arvcf;S337	P98203;S337	1.12533	-1.2384	1.18959	0.240815	0.92534
Aspscr1;S193	Q8VBT9;S193	1.06125	0.655036	1.17978	0.244655	0.92534
Atp8a2;S1110	P98200;S1110	-0.481665	-0.10642	-1.18567	0.242343	0.92534
Bai2;S1269	Q8CGM1;S1269	0.355789	-1.80282	1.17928	0.24485	0.92534
Basp1;S40	Q91XV3;S40	-0.380493	4.73072	-1.20215	0.235964	0.92534
Bclaf1;S656	Q8K019;S656	-0.471011	1.71993	-1.22826	0.226111	0.92534
Begain;S357	Q68EF6;S357	-0.501005	-0.0600879	-1.21528	0.230973	0.92534
Bin1;S286	O08539;S286	0.735409	2.86948	1.22006	0.229172	0.92534
Brsk1;S751	Q5RJI5;S751	0.430427	-0.132788	1.23019	0.225396	0.92534
Bsn;S1173	O88737;S1173	-1.03178	2.83277	-1.16555	0.250299	0.92534
Bsn;S1491	O88737;S1491	-1.14798	-0.863594	-1.19394	0.239126	0.92534
Bsn;S2908	O88737;S2908	-0.748258	-0.691199	-1.21194	0.232237	0.92534
Bsn;T55	O88737;T55	-0.535728	0.742402	-1.22939	0.225694	0.92534
Cacna1e;S2097	Q61290;S2097	0.493232	-1.33633	1.20615	0.234435	0.92534
Camk2b;T400	P28652;T400	0.543766	-0.366528	1.17297	0.247345	0.92534
Camsap1;S718	A2AHC3;S718	-0.571332	-1.89338	-1.18983	0.240721	0.92534
Cask;S319	O70589;S319	0.476447	-1.72848	1.22377	0.227784	0.92534
Cask;S348	O70589;S348	0.382174	-2.45194	1.17393	0.246963	0.92534
Caskin1;S1036	Q6P9K8;S1036	0.446924	1.218	1.17892	0.244993	0.92534
Caskin1;S1402	Q6P9K8;S1402	-0.516005	0.693516	-1.23063	0.225233	0.92534
Caskin1;S723	Q6P9K8;S723	-1.10153	-1.58175	-1.22453	0.227502	0.92534
Cc2d1a;S312	Q8K1A6;S312	0.447785	-2.65986	1.2281	0.226174	0.92534
Ccnl1;S358	Q52KE7;S358	-0.409812	-0.892523	-1.17078	0.248215	0.92534
Cdc42ep4;S165	Q9JM96;S165	0.595342	-1.86371	1.16874	0.249025	0.92534
Cdk14;S95	O35495;S95	0.534021	1.39163	1.19673	0.238048	0.92534
Clip1;S203	Q922J3;S203	-0.381146	-0.105508	-1.19721	0.237865	0.92534
Clip1;S311	Q922J3;S311	-0.507541	-1.38035	-1.20076	0.2365	0.92534
Cnksr2;S541	Q80YA9;S541	0.475262	0.0708713	1.22172	0.228553	0.92534
Cntn1;T584	P12960;T584	0.412735	-0.00583586	1.16736	0.249579	0.92534
Coro1a;T418	O89053;T418	-0.557666	0.127947	-1.17332	0.247204	0.92534
Cpd;T1365	O89001;T1365	0.492455	-0.676899	1.17586	0.246199	0.92534
Ctnna2;S640	Q61301;S640	0.525793	1.02196	1.17145	0.24795	0.92534
Ctnnbip1;S59	Q9JJN6;S59	0.474671	-0.540398	1.16751	0.249518	0.92534
Dclk1;S330	Q9JLM8;S330	0.438042	1.05246	1.19079	0.240351	0.92534
Dip2b;S99	Q3UH60;S99	-0.482811	0.178189	-1.16613	0.250071	0.92534
Dis3l2;S864	Q8CI75;S864	-0.415296	2.42008	-1.21757	0.230111	0.92534
Dlg5;T984	E9Q9R9;T984	-0.553404	-2.71143	-1.19134	0.240134	0.92534
Dlgap4;S611	B1AZP2;S611	-0.394911	-0.130844	-1.16629	0.250005	0.92534
Dmtn;S92	Q9WV69;S92	-1.01099	3.79505	-1.21566	0.230827	0.92534
Dmxl2;S1309	Q8BPN8;S1309	0.451554	0.921461	1.19883	0.23724	0.92534
Dnm1;S264	P39053;S264	-0.28961	-2.39377	-1.18081	0.244251	0.92534
Dnm1;S512	P39053;S512	-0.372335	0.432449	-1.22576	0.227041	0.92534
Dnm1;T511	P39053;T511	-0.372335	0.432449	-1.22576	0.227041	0.92534
Dock4;S1629	P59764;S1629	0.583012	-0.214061	1.21502	0.231071	0.92534
Eef2;T57	P58252;T57	0.802365	-0.779851	1.23081	0.225166	0.92534
Efhd2;S76	Q9D8Y0;S76	-0.458172	-1.25463	-1.19661	0.238098	0.92534
Efnb1;S280	P52795;S280	-0.358724	-2.97456	-1.22398	0.227705	0.92534
Eif3b;S120	Q8JZQ9;S120	0.444117	1.92436	1.18964	0.240796	0.92534
Epb41l1;S510	Q9Z2H5;S510	0.904975	-0.0665852	1.19048	0.240469	0.92534
Fam126a;S453	Q6P9N1;S453	-0.30731	-0.577808	-1.21338	0.231689	0.92534
Fam171a2;S445	A2A699;S445	-0.847408	-0.0137775	-1.19359	0.239264	0.92534
Fundc1;S13	Q9DB70;S13	0.510544	0.42221	1.18034	0.244434	0.92534
Fxr2;S604	Q9WVR4;S604	0.593757	0.282589	1.1717	0.247851	0.92534
Gab1;S420	Q9QYY0;S420	-0.460527	-1.2578	-1.20729	0.234001	0.92534
Gabrg2;S381	P22723;S381	-0.405823	0.786519	-1.18504	0.242591	0.92534
Gapdh;T182	P16858;T182	0.664506	0.810917	1.18461	0.24276	0.92534
Gatad2b;S136	Q8VHR5;S136	0.535092	-1.99766	1.17851	0.245155	0.92534
Gpr158;S1059	Q8C419;S1059	-0.463093	3.3877	-1.18049	0.244375	0.92534
Gpr158;S699	Q8C419;S699	-0.544808	0.391903	-1.21834	0.229819	0.92534
Grm5;T840	Q3UVX5;T840	0.518428	-0.905624	1.17248	0.247541	0.92534
Hecw2;S858	Q6I6G8;S858	-0.474392	-0.640776	-1.21558	0.230857	0.92534
Hist1h4a;S48	P62806;S48	-0.725494	0.439443	-1.22194	0.228471	0.92534
Hivep2;S1024	Q3UHF7;S1024	0.48608	-0.754465	1.20975	0.233066	0.92534
Hnrnpul2;S226	Q00PI9;S226	-0.919668	4.19829	-1.1669	0.249762	0.92534
Hsbp1;S76	Q9CQZ1;S76	-0.472915	-0.0390627	-1.17768	0.245482	0.92534
Hsph1;S810	Q61699;S810	0.961239	4.69138	1.17975	0.244665	0.92534
Irs2;S590	P81122;S590	-0.402274	-0.715727	-1.1831	0.243352	0.92534
Itsn1;S335	Q9Z0R4;S335	-0.339979	2.86635	-1.20667	0.234238	0.92534
[truncated: 5,311 more rows]

## Sheet: Supplementary DataS3D_female
Supplementary DataS3D Analysis of differentially expressed PTM (DEPTM) in 5xFAD-DUSP4vs5xFAD in female mouse
[truncated: 7,125 more rows]
