# Supplementary material for: Proteomic Signaling of Dual-Specificity Phosphatase 4 (DUSP4) in Alzheimer’s Disease
Source: Biomolecules. 2024 Jan 3;14(1):66. doi: 10.3390/biom14010066 (PMC10813059; doi:10.3390/biom14010066)
Supplement: Supplementary file 1 [file biomolecules-14-00066-s001.zip › Supplementary.dataS4.xlsx]

## Sheet: Supplementary dataS4A
Supplementary data S4A The male-specific DEP analysis in the human cohort MSBB.
Note: human male subjects were classified by CERAD into AD (with a CERAD of 2), MCI (CERAD of 3or 4) and NL (CERAD = 1). The male-specific DEPs were in AD vs NL. adjP.Val, BH-adjusted p value.
Protein	Symbol	logFC	t	P.Value	adj.P.Val
sp|P21741|MK_HUMAN	MDK	1.84609	11.2141	3.30869e-20	4.01907e-16
cu|P05067-108|A4_Abeta42_HUMAN	APP	2.03487	9.23881	1.46118e-15	8.87446e-12
sp|Q9H4F8|SMOC1_HUMAN	SMOC1	0.77183	9.08945	3.25997e-15	1.31996e-11
sp|Q13501|SQSTM_HUMAN	SQSTM1	0.441737	7.81824	2.72263e-12	8.26795e-09
sp|P05362|ICAM1_HUMAN	ICAM1	0.817589	7.76258	3.63486e-12	8.83053e-09
sp|Q9BXS0|COPA1_HUMAN	COL25A1	1.16686	7.05463	1.35524e-10	2.4237e-07
tr|K7EKL8|K7EKL8_HUMAN	ICAM1	0.697205	7.04863	1.39672e-10	2.4237e-07
sp|P17948-2|VGFR1-2_HUMAN	FLT1	0.355765	6.77691	5.41964e-10	6.51361e-07
sp|P28370|SMCA1_HUMAN	SMARCA1	0.161974	6.77596	5.44527e-10	6.51361e-07
sp|P41240|CSK_HUMAN	CSK	0.169793	6.75981	5.89855e-10	6.51361e-07
tr|E7EMC7|E7EMC7_HUMAN	SQSTM1	0.460468	6.78	5.3375e-10	6.51361e-07
sp|P17948|VGFR1_HUMAN	FLT1	0.328535	6.68656	8.46821e-10	8.57195e-07
sp|P04792|HSPB1_HUMAN	HSPB1	0.554741	6.64451	1.04142e-09	9.03584e-07
sp|P27987|IP3KB_HUMAN	ITPKB	0.400022	6.65123	1.00759e-09	9.03584e-07
sp|O95631|NET1_HUMAN	NTN1	0.623777	6.60459	1.2668e-09	9.05169e-07
sp|P28062|PSB8_HUMAN	PSMB8	0.291661	6.61239	1.21926e-09	9.05169e-07
sp|Q13683|ITA7_HUMAN	ITGA7	0.372329	6.60648	1.25513e-09	9.05169e-07
sp|Q9UH65|SWP70_HUMAN	SWAP70	0.219268	6.58778	1.37555e-09	9.28265e-07
sp|Q12797-10|ASPH-10_HUMAN	ASPH	0.243929	6.50628	2.04797e-09	1.3093e-06
sp|P20702|ITAX_HUMAN	ITGAX	0.389643	6.46212	2.53861e-09	1.54182e-06
sp|P28370-2|SMCA1-2_HUMAN	SMARCA1	0.155932	6.43328	2.91981e-09	1.61213e-06
sp|Q12797|ASPH_HUMAN	ASPH	0.235336	6.43822	2.85072e-09	1.61213e-06
sp|P68104|EF1A1_HUMAN	EEF1A1	0.168133	6.39593	3.49861e-09	1.84772e-06
sp|Q96RT1-9|ERBIN-9_HUMAN	ERBIN	0.332265	6.37859	3.80443e-09	1.92552e-06
sp|Q96RT1|ERBIN_HUMAN	ERBIN	0.336618	6.36842	3.99585e-09	1.94151e-06
sp|P61601|NCALD_HUMAN	NCALD	-0.242055	-6.3581	4.19984e-09	1.96213e-06
sp|Q2M2I8|AAK1_HUMAN	AAK1	-0.176064	-6.33558	4.68124e-09	2.10604e-06
sp|O14966|RAB7L_HUMAN	RAB29	0.264116	6.26065	6.70871e-09	2.38877e-06
sp|O76054|S14L2_HUMAN	SEC14L2	0.234803	6.26392	6.60441e-09	2.38877e-06
sp|P21359-2|NF1-2_HUMAN	NF1	-0.119676	-6.27395	6.29429e-09	2.38877e-06
sp|Q13283|G3BP1_HUMAN	G3BP1	0.164597	6.26313	6.62923e-09	2.38877e-06
sp|Q8N474|SFRP1_HUMAN	SFRP1	0.588983	6.27467	6.27256e-09	2.38877e-06
sp|Q9NPD7|NRN1_HUMAN	NRN1	-0.671523	-6.25529	6.88293e-09	2.38877e-06
tr|A0A2R8Y7R5|A0A2R8Y7R5_HUMAN	SAMHD1	0.308076	6.2818	6.06171e-09	2.38877e-06
tr|B4DIP2|B4DIP2_HUMAN	ERBIN	0.35915	6.26461	6.58255e-09	2.38877e-06
sp|O43157|PLXB1_HUMAN	PLXNB1	0.269519	6.24919	7.08678e-09	2.3912e-06
tr|A0A0G2JLV0|A0A0G2JLV0_HUMAN	TAP2	0.307154	6.23902	7.4404e-09	2.44266e-06
sp|P09038|FGF2_HUMAN	FGF2	0.30611	6.20412	8.78958e-09	2.62315e-06
sp|Q92563|TICN2_HUMAN	SPOCK2	0.273602	6.20864	8.60227e-09	2.62315e-06
sp|Q9Y6U3|ADSV_HUMAN	SCIN	0.675172	6.20141	8.90404e-09	2.62315e-06
tr|B8ZZL6|B8ZZL6_HUMAN	CAPG	0.526091	6.20997	8.54788e-09	2.62315e-06
tr|I3L170|I3L170_HUMAN	MAPT	0.278538	6.19754	9.06991e-09	2.62315e-06
sp|P10636-3|TAU-3_HUMAN	MAPT	0.276866	6.18708	9.53337e-09	2.6375e-06
sp|P40306|PSB10_HUMAN	PSMB10	0.413605	6.18663	9.55381e-09	2.6375e-06
tr|A0A087WVQ9|A0A087WVQ9_HUMAN	EEF1A1	0.183515	6.1342	1.22589e-08	3.27055e-06
tr|F8WE04|F8WE04_HUMAN	HSPB1	0.524553	6.13203	1.23854e-08	3.27055e-06
sp|P21359|NF1_HUMAN	NF1	-0.11555	-6.11544	1.33995e-08	3.46305e-06
sp|P30622-2|CLIP1-2_HUMAN	CLIP1	0.0655977	6.09461	1.47884e-08	3.66601e-06
sp|P40121|CAPG_HUMAN	CAPG	0.528593	6.09639	1.46643e-08	3.66601e-06
tr|K7EPT8|K7EPT8_HUMAN	GFAP	0.800761	6.08777	1.5274e-08	3.71067e-06
tr|H7C417|H7C417_HUMAN	NA	0.207459	6.08319	1.56085e-08	3.71757e-06
sp|P04216|THY1_HUMAN	THY1	-0.212713	-6.06194	1.72567e-08	3.72803e-06
sp|P06737|PYGL_HUMAN	PYGL	0.223214	6.06015	1.7403e-08	3.72803e-06
sp|P98196|AT11A_HUMAN	ATP11A	0.168922	6.07606	1.61438e-08	3.72803e-06
sp|Q0VF96|CGNL1_HUMAN	CGNL1	0.245942	6.05904	1.74939e-08	3.72803e-06
sp|Q9UPN3|MACF1_HUMAN	MACF1	0.109776	6.06725	1.68292e-08	3.72803e-06
tr|A0A1W2PS58|A0A1W2PS58_HUMAN	GFAP	0.80529	6.06679	1.6866e-08	3.72803e-06
sp|O75078|ADA11_HUMAN	ADAM11	-0.227732	-6.04044	1.90978e-08	3.77116e-06
sp|P30622|CLIP1_HUMAN	CLIP1	0.0645797	6.0504	1.82218e-08	3.77116e-06
sp|Q96AQ6|PBIP1_HUMAN	PBXIP1	0.428319	6.04274	1.88921e-08	3.77116e-06
tr|H0Y8L5|H0Y8L5_HUMAN	MLIP	-0.306324	-6.03887	1.92395e-08	3.77116e-06
tr|K7EKA8|K7EKA8_HUMAN	ADAM11	-0.215154	-6.03877	1.92485e-08	3.77116e-06
sp|Q9UPR0|PLCL2_HUMAN	PLCL2	-0.212127	-6.03134	1.9934e-08	3.84346e-06
sp|Q9Y2J0|RP3A_HUMAN	RPH3A	-0.408935	-6.02327	2.07059e-08	3.92992e-06
sp|Q8IY33|MILK2_HUMAN	MICALL2	0.246069	6.01803	2.12217e-08	3.96585e-06
sp|P16284|PECA1_HUMAN	PECAM1	0.300688	5.96295	2.74812e-08	5.05778e-06
sp|O14920|IKKB_HUMAN	IKBKB	0.19443	5.9411	3.04392e-08	5.43743e-06
sp|Q9BZV1|UBXN6_HUMAN	UBXN6	-0.121176	-5.94242	3.02514e-08	5.43743e-06
sp|P29590|PML_HUMAN	PML	0.174821	5.9376	3.09407e-08	5.44691e-06
sp|O15143|ARC1B_HUMAN	ARPC1B	0.292884	5.92526	3.27771e-08	5.45931e-06
sp|Q96PE2|ARHGH_HUMAN	ARHGEF17	0.170601	5.92505	3.28089e-08	5.45931e-06
sp|Q9UJY1|HSPB8_HUMAN	HSPB8	0.536775	5.93302	3.16106e-08	5.45931e-06
tr|K7EPI4|K7EPI4_HUMAN	GFAP	0.897647	5.92653	3.25828e-08	5.45931e-06
sp|P16284-4|PECA1-4_HUMAN	PECAM1	0.3044	5.90056	3.67783e-08	6.03711e-06
tr|A0A1W2PPA3|A0A1W2PPA3_HUMAN	GFAP	0.899299	5.89592	3.75813e-08	6.08667e-06
sp|Q5VWP3-3|MLIP-3_HUMAN	MLIP	-0.285374	-5.88822	3.89533e-08	6.14501e-06
sp|Q96CG8|CTHR1_HUMAN	CTHRC1	0.734766	5.89102	3.84493e-08	6.14501e-06
sp|P18084|ITB5_HUMAN	ITGB5	0.309267	5.87573	4.1283e-08	6.25839e-06
sp|P32456|GBP2_HUMAN	GBP2	0.377657	5.87155	4.20933e-08	6.25839e-06
sp|Q14184|DOC2B_HUMAN	DOC2B	-0.369601	-5.87399	4.16174e-08	6.25839e-06
sp|Q14571|ITPR2_HUMAN	ITPR2	0.19965	5.87542	4.1342e-08	6.25839e-06
sp|Q15019|SEPT2_HUMAN	2023-09-02	0.228384	5.87076	4.22482e-08	6.25839e-06
sp|P01903|DRA_HUMAN	HLA-DRA	0.649524	5.84912	4.67123e-08	6.60065e-06
sp|P28065|PSB9_HUMAN	PSMB9	0.353891	5.85192	4.61098e-08	6.60065e-06
sp|Q86VI3|IQGA3_HUMAN	IQGAP3	0.33177	5.84903	4.67322e-08	6.60065e-06
sp|Q96LD4|TRI47_HUMAN	TRIM47	0.29091	5.85452	4.55556e-08	6.60065e-06
sp|P98172|EFNB1_HUMAN	EFNB1	0.261718	5.84223	4.82289e-08	6.73375e-06
sp|Q9NY15|STAB1_HUMAN	STAB1	0.235992	5.83142	5.07074e-08	6.99934e-06
sp|P48730|KC1D_HUMAN	CSNK1D	0.12664	5.82682	5.1798e-08	7.06956e-06
sp|Q9HB40|RISC_HUMAN	SCPEP1	0.224577	5.82406	5.24649e-08	7.08102e-06
sp|Q99624|S38A3_HUMAN	SLC38A3	0.295536	5.79845	5.90595e-08	7.88347e-06
sp|P26599|PTBP1_HUMAN	PTBP1	0.315649	5.78996	6.14201e-08	8.10946e-06
sp|Q14160|SCRIB_HUMAN	SCRIB	0.180226	5.78527	6.27632e-08	8.19768e-06
sp|Q9Y3Z3|SAMH1_HUMAN	SAMHD1	0.268843	5.76883	6.77039e-08	8.70879e-06
tr|A0A0G2JS76|A0A0G2JS76_HUMAN	MAPT	0.204855	5.76753	6.81102e-08	8.70879e-06
sp|Q03001|DYST_HUMAN	DST	0.116895	5.7638	6.92905e-08	8.76741e-06
sp|O14818-4|PSA7-4_HUMAN	PSMA7	0.110797	5.74405	7.58827e-08	9.31754e-06
sp|P04839|CY24B_HUMAN	CYBB	0.406037	5.74614	7.51556e-08	9.31754e-06
sp|Q8NI27|THOC2_HUMAN	THOC2	0.140269	5.74389	7.59395e-08	9.31754e-06
sp|P35221|CTNA1_HUMAN	CTNNA1	0.210003	5.73248	8.00257e-08	9.63449e-06
sp|P35606|COPB2_HUMAN	COPB2	0.102072	5.73225	8.01089e-08	9.63449e-06
sp|O00634|NET3_HUMAN	NTN3	0.797185	5.7228	8.36629e-08	9.77167e-06
sp|P07108-5|ACBP-5_HUMAN	DBI	0.369219	5.72403	8.31911e-08	9.77167e-06
sp|P07108|ACBP_HUMAN	DBI	0.369664	5.72308	8.35548e-08	9.77167e-06
sp|Q15349-2|KS6A2-2_HUMAN	RPS6KA2	0.206892	5.71646	8.61313e-08	9.90659e-06
tr|D3DSM0|D3DSM0_HUMAN	ITGB2	0.352259	5.71565	8.64492e-08	9.90659e-06
sp|P05107|ITB2_HUMAN	ITGB2	0.347088	5.68952	9.74401e-08	1.04213e-05
sp|P17302|CXA1_HUMAN	GJA1	0.427743	5.69869	9.34371e-08	1.04213e-05
sp|P29120|NEC1_HUMAN	PCSK1	-0.409517	-5.69159	9.65236e-08	1.04213e-05
sp|P52597|HNRPF_HUMAN	HNRNPF	0.185773	5.68871	9.78046e-08	1.04213e-05
sp|Q15149-3|PLEC-3_HUMAN	PLEC	0.327664	5.69057	9.6974e-08	1.04213e-05
sp|Q15149-8|PLEC-8_HUMAN	PLEC	0.328177	5.69557	9.47801e-08	1.04213e-05
sp|Q15149|PLEC_HUMAN	PLEC	0.327172	5.6915	9.65604e-08	1.04213e-05
sp|Q9H1H9-3|KI13A-3_HUMAN	KIF13A	0.165748	5.69767	9.38748e-08	1.04213e-05
sp|P49674|KC1E_HUMAN	CSNK1E	0.118797	5.68519	9.93883e-08	1.0498e-05
sp|P05556|ITB1_HUMAN	ITGB1	0.336479	5.67666	1.0334e-07	1.05501e-05
sp|P17480|UBF1_HUMAN	UBTF	0.147389	5.67825	1.02591e-07	1.05501e-05
sp|P26006|ITA3_HUMAN	ITGA3	0.344217	5.67663	1.03356e-07	1.05501e-05
sp|Q15349|KS6A2_HUMAN	RPS6KA2	0.204002	5.68124	1.01201e-07	1.05501e-05
sp|P40763-2|STAT3-2_HUMAN	STAT3	0.242461	5.67445	1.04392e-07	1.05671e-05
sp|P46940|IQGA1_HUMAN	IQGAP1	0.316229	5.66871	1.07165e-07	1.07581e-05
sp|P30622-1|CLIP1-1_HUMAN	CLIP1	0.0616267	5.66619	1.08401e-07	1.07931e-05
sp|P48729-3|KC1A-3_HUMAN	CSNK1A1	0.140308	5.65871	1.12167e-07	1.08134e-05
sp|Q9H3N1|TMX1_HUMAN	TMX1	0.224041	5.6592	1.11914e-07	1.08134e-05
tr|H0YDN1|H0YDN1_HUMAN	PLEC	0.320143	5.66049	1.11259e-07	1.08134e-05
tr|X5CMH5|X5CMH5_HUMAN	TAP2	0.279414	5.66236	1.10315e-07	1.08134e-05
sp|Q9Y4J8-13|DTNA-13_HUMAN	DTNA	0.307586	5.65684	1.13129e-07	1.08203e-05
sp|Q4KMQ2|ANO6_HUMAN	ANO6	0.403738	5.65077	1.16304e-07	1.10371e-05
sp|Q9H1H9|KI13A_HUMAN	KIF13A	0.184365	5.63628	1.24242e-07	1.1699e-05
sp|Q02156|KPCE_HUMAN	PRKCE	-0.20387	-5.63197	1.26701e-07	1.17483e-05
tr|F6QMI7|F6QMI7_HUMAN	DST	0.116214	5.63267	1.26298e-07	1.17483e-05
sp|P53384|NUBP1_HUMAN	NUBP1	0.250071	5.62453	1.31064e-07	1.20609e-05
sp|P20700|LMNB1_HUMAN	LMNB1	0.181672	5.61279	1.38245e-07	1.2626e-05
sp|Q8NHQ8|RASF8_HUMAN	RASSF8	0.19046	5.60651	1.42248e-07	1.28567e-05
tr|B7Z2U2|B7Z2U2_HUMAN	TOM1L2	-0.135568	-5.60552	1.42887e-07	1.28567e-05
tr|H3BQK9|H3BQK9_HUMAN	MACF1	0.101379	5.59894	1.47217e-07	1.31489e-05
sp|P10636|TAU_HUMAN	MAPT	0.195154	5.5949	1.49941e-07	1.32014e-05
sp|P48730-2|KC1D-2_HUMAN	CSNK1D	0.124476	5.59462	1.50129e-07	1.32014e-05
sp|P51178-2|PLCD1-2_HUMAN	PLCD1	0.412251	5.58878	1.54159e-07	1.32014e-05
sp|Q13637|RAB32_HUMAN	RAB32	0.274956	5.58853	1.54336e-07	1.32014e-05
sp|Q8IYB5|SMAP1_HUMAN	SMAP1	-0.162303	-5.58925	1.53827e-07	1.32014e-05
sp|Q8N9N7|LRC57_HUMAN	LRRC57	-0.208876	-5.58732	1.55183e-07	1.32014e-05
sp|Q96EQ0|SGTB_HUMAN	SGTB	-0.217937	-5.58699	1.55413e-07	1.32014e-05
sp|Q567U6|CCD93_HUMAN	CCDC93	0.0979238	5.57086	1.67189e-07	1.40059e-05
sp|Q8IV01|SYT12_HUMAN	SYT12	-0.371052	-5.57176	1.66514e-07	1.40059e-05
sp|P51178|PLCD1_HUMAN	PLCD1	0.428483	5.56718	1.69995e-07	1.411e-05
sp|Q14160-3|SCRIB-3_HUMAN	SCRIB	0.173597	5.5662	1.70756e-07	1.411e-05
sp|P29350|PTN6_HUMAN	PTPN6	0.295535	5.555	1.79625e-07	1.47426e-05
sp|P01112|RASH_HUMAN	HRAS	-0.100792	-5.54711	1.86134e-07	1.4946e-05
sp|P40763|STAT3_HUMAN	STAT3	0.238503	5.54654	1.86618e-07	1.4946e-05
sp|Q99784|NOE1_HUMAN	OLFM1	-0.333074	-5.54611	1.86984e-07	1.4946e-05
tr|A0A075B7B1|A0A075B7B1_HUMAN	SYNM	0.483918	5.54606	1.87025e-07	1.4946e-05
sp|Q9Y5I4|PCDC2_HUMAN	PCDHAC2	-0.159424	-5.54092	1.91414e-07	1.51967e-05
sp|O95817|BAG3_HUMAN	BAG3	0.452349	5.52792	2.0297e-07	1.55749e-05
sp|P0C0L5|CO4B_HUMAN	C4B	0.491582	5.52918	2.01815e-07	1.55749e-05
sp|P26038|MOES_HUMAN	MSN	0.357656	5.53103	2.00143e-07	1.55749e-05
sp|P28290|ITPI2_HUMAN	ITPRID2	0.310486	5.52416	2.06435e-07	1.55749e-05
sp|P48729-2|KC1A-2_HUMAN	CSNK1A1	0.135805	5.52679	2.04005e-07	1.55749e-05
sp|Q15907|RB11B_HUMAN	RAB11B	0.0764389	5.52563	2.0507e-07	1.55749e-05
sp|Q96PB7|NOE3_HUMAN	OLFM3	-0.40482	-5.53023	2.00862e-07	1.55749e-05
tr|B0YJC5|B0YJC5_HUMAN	VIM	0.582124	5.52544	2.05253e-07	1.55749e-05
sp|Q9Y570|PPME1_HUMAN	PPME1	-0.102749	-5.51613	2.14041e-07	1.60131e-05
tr|A0A0G2JPR0|A0A0G2JPR0_HUMAN	C4A	0.499795	5.51526	2.14879e-07	1.60131e-05
tr|A0A140TA44|A0A140TA44_HUMAN	C4A	0.489762	5.50907	2.2095e-07	1.63651e-05
sp|Q9H307|PININ_HUMAN	PNN	0.144157	5.50661	2.23411e-07	1.64285e-05
sp|Q9HBT6|CAD20_HUMAN	CDH20	0.262154	5.50551	2.2451e-07	1.64285e-05
sp|O15061|SYNEM_HUMAN	SYNM	0.46626	5.49835	2.31861e-07	1.68514e-05
sp|Q03001-3|DYST-3_HUMAN	DST	0.105888	5.49719	2.33065e-07	1.68514e-05
sp|Q06830|PRDX1_HUMAN	PRDX1	0.264818	5.4927	2.37821e-07	1.70936e-05
sp|P32455|GBP1_HUMAN	GBP1	0.447911	5.48938	2.41389e-07	1.72479e-05
sp|P42892|ECE1_HUMAN	ECE1	0.21726	5.47924	2.52627e-07	1.7841e-05
sp|Q13576|IQGA2_HUMAN	IQGAP2	0.305414	5.47946	2.52382e-07	1.7841e-05
sp|Q15223|NECT1_HUMAN	NECTIN1	-0.184164	-5.47327	2.59485e-07	1.82195e-05
sp|P14136-2|GFAP-2_HUMAN	GFAP	0.770608	5.46871	2.64846e-07	1.8489e-05
tr|F8W131|F8W131_HUMAN	RPH3A	-0.402975	-5.46422	2.70224e-07	1.87567e-05
tr|A0A1W2PR46|A0A1W2PR46_HUMAN	GFAP	0.776958	5.4628	2.71943e-07	1.87687e-05
sp|Q03519|TAP2_HUMAN	TAP2	0.277677	5.45558	2.80885e-07	1.92763e-05
sp|P0C0L4|CO4A_HUMAN	C4A	0.49068	5.45242	2.84888e-07	1.93326e-05
sp|Q8TER5-3|ARH40-3_HUMAN	ARHGEF40	0.169459	5.45355	2.83443e-07	1.93326e-05
sp|Q9NQT8|KI13B_HUMAN	KIF13B	0.182292	5.45109	2.86579e-07	1.93393e-05
sp|P14136|GFAP_HUMAN	GFAP	0.780024	5.4488	2.89533e-07	1.94307e-05
sp|Q13153|PAK1_HUMAN	PAK1	-0.214666	-5.44401	2.958e-07	1.97179e-05
sp|Q13976-2|KGP1-2_HUMAN	PRKG1	0.32616	5.44306	2.97059e-07	1.97179e-05
sp|Q6ZVM7|TM1L2_HUMAN	TOM1L2	-0.120552	-5.43672	3.05601e-07	2.01746e-05
sp|A0A0K0K1G8|TVBJ2_HUMAN	TRBV10-2	0.566324	5.43273	3.11086e-07	2.04257e-05
sp|O00451|GFRA2_HUMAN	GFRA2	-0.387407	-5.42901	3.163e-07	2.06564e-05
sp|P20292|AL5AP_HUMAN	ALOX5AP	0.435353	5.41851	3.31475e-07	2.13265e-05
sp|P49023|PAXI_HUMAN	PXN	0.27061	5.41869	3.31197e-07	2.13265e-05
sp|Q15120|PDK3_HUMAN	PDK3	-0.15315	-5.41827	3.31827e-07	2.13265e-05
sp|P05787|K2C8_HUMAN	KRT8	0.787646	5.41553	3.35906e-07	2.14284e-05
tr|F8W1U3|F8W1U3_HUMAN	KRT8	0.848564	5.41484	3.36941e-07	2.14284e-05
sp|P10114|RAP2A_HUMAN	RAP2A	-0.183644	-5.40544	3.51353e-07	2.22285e-05
sp|Q13636|RAB31_HUMAN	RAB31	0.163151	5.40414	3.53385e-07	2.22413e-05
sp|Q9UGI6|KCNN3_HUMAN	KCNN3	0.361508	5.40079	3.58691e-07	2.23484e-05
sp|Q9Y230|RUVB2_HUMAN	RUVBL2	0.133177	5.40075	3.58767e-07	2.23484e-05
sp|Q6UW02|CP20A_HUMAN	CYP20A1	0.350463	5.39678	3.65151e-07	2.263e-05
sp|P29350-2|PTN6-2_HUMAN	PTPN6	0.276408	5.39507	3.67947e-07	2.26493e-05
tr|A0A3B3ISF9|A0A3B3ISF9_HUMAN	ECE1	0.213379	5.39431	3.69192e-07	2.26493e-05
sp|Q8TDM6|DLG5_HUMAN	DLG5	0.12061	5.39165	3.73587e-07	2.28038e-05
sp|Q96DH6|MSI2H_HUMAN	MSI2	0.202046	5.38887	3.78228e-07	2.29717e-05
sp|P19474|RO52_HUMAN	TRIM21	0.258224	5.38426	3.86064e-07	2.29949e-05
sp|P27824|CALX_HUMAN	CANX	0.137176	5.38419	3.86183e-07	2.29949e-05
sp|P46939|UTRO_HUMAN	UTRN	0.300849	5.38549	3.83959e-07	2.29949e-05
sp|Q13976|KGP1_HUMAN	PRKG1	0.311318	5.38729	3.80906e-07	2.29949e-05
sp|O60941|DTNB_HUMAN	DTNB	0.223314	5.38089	3.91883e-07	2.32031e-05
tr|A0A1W2PRT3|A0A1W2PRT3_HUMAN	GFAP	0.764894	5.37997	3.935e-07	2.32031e-05
sp|P09960|LKHA4_HUMAN	LTA4H	0.130365	5.3735	4.04958e-07	2.37634e-05
sp|Q9NVD7|PARVA_HUMAN	PARVA	0.31861	5.37137	4.08805e-07	2.38481e-05
tr|K7ELP4|K7ELP4_HUMAN	GFAP	0.778044	5.37053	4.10327e-07	2.38481e-05
sp|O00468|AGRIN_HUMAN	AGRN	0.190107	5.36805	4.14878e-07	2.39087e-05
sp|P78347|GTF2I_HUMAN	GTF2I	0.150477	5.36675	4.17276e-07	2.39087e-05
sp|Q15907-2|RB11B-2_HUMAN	RAB11B	0.0748937	5.3671	4.16624e-07	2.39087e-05
sp|O00468-6|AGRIN-6_HUMAN	AGRN	0.192152	5.36294	4.24389e-07	2.40367e-05
sp|P35609-2|ACTN2-2_HUMAN	ACTN2	-0.281576	-5.36352	4.23298e-07	2.40367e-05
sp|P48507|GSH0_HUMAN	GCLM	0.232028	5.36238	4.25447e-07	2.40367e-05
sp|Q99747|SNAG_HUMAN	NAPG	-0.124245	-5.35948	4.30948e-07	2.42349e-05
sp|Q14289|FAK2_HUMAN	PTK2B	-0.188379	-5.35014	4.49157e-07	2.51424e-05
sp|Q9NSD9|SYFB_HUMAN	FARSB	-0.21516	-5.34852	4.52389e-07	2.52072e-05
sp|Q9Y653|AGRG1_HUMAN	ADGRG1	0.22939	5.347	4.55442e-07	2.52614e-05
sp|Q8NEL9|DDHD1_HUMAN	DDHD1	-0.147259	-5.34277	4.64045e-07	2.52769e-05
sp|Q96FW1|OTUB1_HUMAN	OTUB1	-0.104778	-5.34298	4.63622e-07	2.52769e-05
sp|Q9NRD5|PICK1_HUMAN	PICK1	-0.173806	-5.34302	4.63528e-07	2.52769e-05
sp|Q9NZ45|CISD1_HUMAN	CISD1	-0.15005	-5.34501	4.59462e-07	2.52769e-05
sp|O15240|VGF_HUMAN	VGF	-0.488073	-5.3415	4.66673e-07	2.53066e-05
sp|P02746|C1QB_HUMAN	C1QB	0.358246	5.34008	4.69614e-07	2.53267e-05
sp|P78536|ADA17_HUMAN	ADAM17	0.195944	5.33931	4.71213e-07	2.53267e-05
sp|Q96HC4|PDLI5_HUMAN	PDLIM5	0.323844	5.32927	4.92586e-07	2.62432e-05
tr|Q5T0V7|Q5T0V7_HUMAN	DST	0.11652	5.33024	4.90478e-07	2.62432e-05
sp|P30041|PRDX6_HUMAN	PRDX6	0.39037	5.32427	5.03589e-07	2.65961e-05
sp|Q9BUH6|PAXX_HUMAN	PAXX	0.236227	5.32463	5.02789e-07	2.65961e-05
sp|O95197|RTN3_HUMAN	RTN3	-0.1519	-5.32061	5.11803e-07	2.69129e-05
tr|F8W9J4|F8W9J4_HUMAN	DST	0.10965	5.31917	5.15061e-07	2.69675e-05
sp|Q13162|PRDX4_HUMAN	PRDX4	0.222971	5.31188	5.31918e-07	2.77305e-05
sp|Q9H902|REEP1_HUMAN	REEP1	-0.180412	-5.31062	5.3488e-07	2.77657e-05
sp|P08631|HCK_HUMAN	HCK	0.166907	5.30962	5.37239e-07	2.77696e-05
sp|O00468-3|AGRIN-3_HUMAN	AGRN	0.187767	5.30427	5.50065e-07	2.8312e-05
sp|P10636-5|TAU-5_HUMAN	MAPT	0.185073	5.30254	5.54264e-07	2.84078e-05
sp|P10636-2|TAU-2_HUMAN	MAPT	0.18592	5.29491	5.73216e-07	2.92557e-05
sp|Q08043|ACTN3_HUMAN	ACTN3	-0.162033	-5.29318	5.77603e-07	2.92573e-05
sp|Q96I99|SUCB2_HUMAN	SUCLG2	0.274628	5.293	5.78064e-07	2.92573e-05
sp|P09913|IFIT2_HUMAN	IFIT2	0.182374	5.28511	5.98471e-07	3.00825e-05
sp|P49585|PCY1A_HUMAN	PCYT1A	0.138918	5.28411	6.01128e-07	3.00825e-05
sp|Q8IYB5-2|SMAP1-2_HUMAN	SMAP1	-0.153174	-5.28385	6.01799e-07	3.00825e-05
sp|Q8TCU6|PREX1_HUMAN	PREX1	0.16167	5.27614	6.22566e-07	3.09931e-05
sp|P10909|CLUS_HUMAN	CLU	0.260028	5.27446	6.27156e-07	3.10941e-05
sp|P08670|VIME_HUMAN	VIM	0.565101	5.26889	6.4269e-07	3.17348e-05
sp|Q16576|RBBP7_HUMAN	RBBP7	0.117207	5.2678	6.45775e-07	3.17538e-05
sp|Q16799|RTN1_HUMAN	RTN1	-0.136456	-5.26691	6.48303e-07	3.17538e-05
sp|P17480-2|UBF1-2_HUMAN	UBTF	0.137077	5.26244	6.61165e-07	3.22537e-05
sp|P50479|PDLI4_HUMAN	PDLIM4	0.394458	5.25919	6.70672e-07	3.25866e-05
sp|P41226|UBA7_HUMAN	UBA7	0.235734	5.25298	6.89177e-07	3.30887e-05
sp|Q9Y6I3|EPN1_HUMAN	EPN1	-0.163911	-5.25299	6.89148e-07	3.30887e-05
tr|A0A2R8Y8E0|A0A2R8Y8E0_HUMAN	BRAF	-0.117417	-5.25426	6.85311e-07	3.30887e-05
sp|Q9Y285|SYFA_HUMAN	FARSA	-0.191377	-5.24819	7.03793e-07	3.36574e-05
sp|Q9Y6I3-1|EPN1-1_HUMAN	EPN1	-0.164112	-5.24577	7.11313e-07	3.38836e-05
sp|P48729|KC1A_HUMAN	CSNK1A1	0.13195	5.24141	7.25013e-07	3.44013e-05
tr|K7EKD1|K7EKD1_HUMAN	GFAP	0.771438	5.23818	7.35337e-07	3.47554e-05
sp|Q8N129|CNPY4_HUMAN	CNPY4	0.256274	5.23464	7.46804e-07	3.51606e-05
sp|Q9BQI7|PSD2_HUMAN	PSD2	0.222115	5.23335	7.5104e-07	3.52235e-05
sp|O60941-3|DTNB-3_HUMAN	DTNB	0.216098	5.23083	7.59387e-07	3.5478e-05
sp|Q92878|RAD50_HUMAN	RAD50	0.183743	5.22757	7.70267e-07	3.58484e-05
sp|P43686|PRS6B_HUMAN	PSMC4	0.0821483	5.22451	7.8065e-07	3.6193e-05
sp|P08581|MET_HUMAN	MET	-0.284475	-5.22057	7.94223e-07	3.62755e-05
sp|P16070-10|CD44-10_HUMAN	CD44	0.74413	5.22095	7.92896e-07	3.62755e-05
sp|P16070|CD44_HUMAN	CD44	0.74413	5.22095	7.92896e-07	3.62755e-05
sp|Q9UEY8-2|ADDG-2_HUMAN	ADD3	0.208992	5.22052	7.94376e-07	3.62755e-05
sp|Q92608|DOCK2_HUMAN	DOCK2	0.271964	5.2182	8.02457e-07	3.65073e-05
sp|P49959|MRE11_HUMAN	MRE11	0.191241	5.21626	8.09312e-07	3.66818e-05
sp|O94804|STK10_HUMAN	STK10	0.160104	5.21169	8.25598e-07	3.68696e-05
sp|P48059|LIMS1_HUMAN	LIMS1	0.265158	5.21184	8.25073e-07	3.68696e-05
sp|Q14956|GPNMB_HUMAN	GPNMB	0.754309	5.21343	8.19358e-07	3.68696e-05
sp|Q9Y2J2-4|E41L3-4_HUMAN	EPB41L3	-0.18785	-5.21204	8.2436e-07	3.68696e-05
sp|Q5JSL3|DOC11_HUMAN	DOCK11	0.156819	5.20458	8.51613e-07	3.77538e-05
sp|Q9UPP2|IQEC3_HUMAN	IQSEC3	-0.136046	-5.20504	8.49912e-07	3.77538e-05
tr|A0A1W2PQ90|A0A1W2PQ90_HUMAN	NA	0.181554	5.20368	8.54988e-07	3.77656e-05
sp|Q14118|DAG1_HUMAN	DAG1	0.159545	5.20159	8.6282e-07	3.79735e-05
tr|A0A096LP60|A0A096LP60_HUMAN	AAK1	-0.243628	-5.18475	9.28468e-07	4.07152e-05
sp|Q15223-2|NECT1-2_HUMAN	NECTIN1	-0.18386	-5.18305	9.35367e-07	4.08701e-05
sp|Q6YHK3|CD109_HUMAN	CD109	0.420814	5.17929	9.50818e-07	4.13964e-05
sp|Q5VWP3|MLIP_HUMAN	MLIP	-0.247626	-5.17742	9.58577e-07	4.14893e-05
sp|Q9Y5K6|CD2AP_HUMAN	CD2AP	0.214693	5.17713	9.59784e-07	4.14893e-05
sp|P18754-2|RCC1-2_HUMAN	RCC1	0.156013	5.17524	9.67704e-07	4.16833e-05
sp|O60861|GAS7_HUMAN	GAS7	-0.22388	-5.16643	1.00546e-06	4.28776e-05
sp|P50552|VASP_HUMAN	VASP	0.193097	5.16542	1.0099e-06	4.28776e-05
sp|Q00653-4|NFKB2-4_HUMAN	NFKB2	0.183177	5.16642	1.00549e-06	4.28776e-05
sp|Q03518|TAP1_HUMAN	TAP1	0.226853	5.16495	1.01196e-06	4.28776e-05
sp|Q9Y4J8-12|DTNA-12_HUMAN	DTNA	0.209977	5.16469	1.01308e-06	4.28776e-05
sp|Q9Y617|SERC_HUMAN	PSAT1	0.304839	5.1627	1.02189e-06	4.30055e-05
tr|X6R3P0|X6R3P0_HUMAN	SLIT2	0.185929	5.16241	1.02318e-06	4.30055e-05
sp|Q13464|ROCK1_HUMAN	ROCK1	0.146313	5.15508	1.05625e-06	4.42425e-05
sp|P13498|CY24A_HUMAN	CYBA	0.364797	5.15139	1.07327e-06	4.48007e-05
sp|Q13367|AP3B2_HUMAN	AP3B2	-0.171435	-5.14923	1.08338e-06	4.50678e-05
sp|P10636-4|TAU-4_HUMAN	MAPT	0.179882	5.14755	1.09128e-06	4.52416e-05
sp|Q63HR2|TNS2_HUMAN	TNS2	0.205315	5.1429	1.11352e-06	4.58506e-05
sp|Q9UQE7|SMC3_HUMAN	SMC3	0.202902	5.14335	1.11135e-06	4.58506e-05
sp|O60941-2|DTNB-2_HUMAN	DTNB	0.207034	5.14091	1.12316e-06	4.58536e-05
sp|Q8IWQ3|BRSK2_HUMAN	BRSK2	-0.122185	-5.14055	1.12492e-06	4.58536e-05
sp|Q8TDC3|BRSK1_HUMAN	BRSK1	-0.123549	-5.14115	1.122e-06	4.58536e-05
sp|P29590-12|PML-12_HUMAN	PML	0.167596	5.13541	1.1502e-06	4.67275e-05
sp|P25788|PSA3_HUMAN	PSMA3	0.103487	5.13346	1.15998e-06	4.69676e-05
sp|Q93009|UBP7_HUMAN	USP7	-0.0869834	-5.13234	1.16562e-06	4.70394e-05
sp|O00429|DNM1L_HUMAN	DNM1L	-0.130305	-5.12967	1.17917e-06	4.73195e-05
sp|O95715|CXL14_HUMAN	CXCL14	0.39459	5.12943	1.18036e-06	4.73195e-05
sp|Q13510|ASAH1_HUMAN	ASAH1	0.241442	5.12471	1.20472e-06	4.81374e-05
sp|Q96T51|RUFY1_HUMAN	RUFY1	0.113965	5.12356	1.21071e-06	4.82181e-05
tr|Q8IWY7|Q8IWY7_HUMAN	TTBK2	0.735223	5.12166	1.22074e-06	4.84584e-05
tr|A0A0M3HER1|A0A0M3HER1_HUMAN	LIMS1	0.256866	5.11853	1.23735e-06	4.89581e-05
sp|P47972|NPTX2_HUMAN	NPTX2	-0.596796	-5.11697	1.2457e-06	4.89692e-05
tr|Q5T5H1|Q5T5H1_HUMAN	ENSA	-0.179559	-5.11704	1.24531e-06	4.89692e-05
sp|Q13418-2|ILK-2_HUMAN	ILK	0.264492	5.11014	1.28301e-06	5.02733e-05
sp|Q07812-5|BAX-5_HUMAN	BAX	0.150689	5.10711	1.29989e-06	5.07708e-05
sp|Q8NBI5|S43A3_HUMAN	SLC43A3	0.306615	5.10265	1.32513e-06	5.15909e-05
sp|Q92743|HTRA1_HUMAN	HTRA1	0.38236	5.09854	1.34885e-06	5.23465e-05
sp|P31949|S10AB_HUMAN	S100A11	0.451144	5.09533	1.36761e-06	5.27267e-05
sp|Q07812|BAX_HUMAN	BAX	0.153455	5.09466	1.37161e-06	5.27267e-05
sp|Q96Q06-2|PLIN4-2_HUMAN	PLIN4	0.334812	5.09465	1.37167e-06	5.27267e-05
sp|Q9Y4J8-11|DTNA-11_HUMAN	DTNA	0.322722	5.09319	1.38032e-06	5.2892e-05
sp|O76071|CIAO1_HUMAN	CIAO1	0.124009	5.08812	1.41079e-06	5.38895e-05
sp|P22087|FBRL_HUMAN	FBL	0.138651	5.08411	1.43533e-06	5.46551e-05
sp|O14818|PSA7_HUMAN	PSMA7	0.0986639	5.07931	1.4653e-06	5.56217e-05
sp|O14829|PPE1_HUMAN	PPEF1	-0.296345	-5.07583	1.48739e-06	5.61099e-05
sp|Q7Z698|SPRE2_HUMAN	SPRED2	-0.153907	-5.07598	1.48643e-06	5.61099e-05
sp|P04843|RPN1_HUMAN	RPN1	0.098265	5.07288	1.50636e-06	5.64747e-05
sp|P25208|NFYB_HUMAN	NFYB	0.244532	5.07356	1.50202e-06	5.64747e-05
sp|P08575|PTPRC_HUMAN	PTPRC	0.28308	5.07114	1.51767e-06	5.65495e-05
sp|P45973|CBX5_HUMAN	CBX5	0.150066	5.07167	1.51423e-06	5.65495e-05
sp|Q9Y6N5|SQOR_HUMAN	SQOR	0.326447	5.06918	1.53052e-06	5.68538e-05
sp|Q96D46|NMD3_HUMAN	NMD3	0.15733	5.06833	1.53612e-06	5.6888e-05
sp|Q04446|GLGB_HUMAN	GBE1	0.153295	5.06326	1.56995e-06	5.79641e-05
sp|O94813|SLIT2_HUMAN	SLIT2	0.200485	5.06122	1.58376e-06	5.82783e-05
sp|P17655|CAN2_HUMAN	CAPN2	0.264441	5.06059	1.58806e-06	5.82783e-05
tr|B4E171|B4E171_HUMAN	NA	-0.277497	-5.0593	1.5969e-06	5.84263e-05
sp|Q00653|NFKB2_HUMAN	NFKB2	0.181565	5.05664	1.61523e-06	5.87432e-05
tr|A0A087WSZ2|A0A087WSZ2_HUMAN	ACTN3	-0.187008	-5.05703	1.61251e-06	5.87432e-05
tr|M3ZCP1|M3ZCP1_HUMAN	PTPRC	0.310673	5.05518	1.62534e-06	5.89343e-05
sp|Q96Q06|PLIN4_HUMAN	PLIN4	0.334316	5.05173	1.64961e-06	5.96363e-05
sp|P16144|ITB4_HUMAN	ITGB4	0.30458	5.04789	1.677e-06	6.01552e-05
sp|Q6EMK4|VASN_HUMAN	VASN	0.276823	5.04873	1.67099e-06	6.01552e-05
sp|Q9Y4F5|C170B_HUMAN	CEP170B	-0.140153	-5.04763	1.67882e-06	6.01552e-05
sp|B7ZW38|HNRC3_HUMAN	HNRNPCL3	0.121889	5.04621	1.68914e-06	6.01699e-05
sp|Q14258|TRI25_HUMAN	TRIM25	0.204839	5.04654	1.68674e-06	6.01699e-05
tr|H0YAS8|H0YAS8_HUMAN	CLU	0.248557	5.04239	1.71697e-06	6.09826e-05
sp|P00568|KAD1_HUMAN	AK1	0.249765	5.03807	1.74901e-06	6.15803e-05
sp|P16930|FAAA_HUMAN	FAH	0.350121	5.03833	1.74708e-06	6.15803e-05
sp|Q9ULA0|DNPEP_HUMAN	DNPEP	0.179704	5.03827	1.74758e-06	6.15803e-05
sp|Q09666|AHNK_HUMAN	AHNAK	0.450345	5.03685	1.7582e-06	6.17249e-05
sp|O14773|TPP1_HUMAN	TPP1	0.219417	5.03141	1.7996e-06	6.26352e-05
sp|Q8IWQ3-4|BRSK2-4_HUMAN	BRSK2	-0.122118	-5.03151	1.79886e-06	6.26352e-05
sp|Q8TDX7|NEK7_HUMAN	NEK7	0.277359	5.03227	1.79303e-06	6.26352e-05
sp|Q15029|U5S1_HUMAN	EFTUD2	0.091154	5.0299	1.8113e-06	6.28624e-05
sp|Q8IVB4|SL9A9_HUMAN	SLC9A9	0.272362	5.02692	1.83453e-06	6.34872e-05
sp|Q13424|SNTA1_HUMAN	SNTA1	0.2381	5.02568	1.8443e-06	6.3644e-05
tr|A0A0J9YXN7|A0A0J9YXN7_HUMAN	PLIN4	0.326276	5.02367	1.86016e-06	6.40096e-05
sp|Q13625|ASPP2_HUMAN	TP53BP2	0.210109	5.01941	1.89434e-06	6.50016e-05
sp|P35609|ACTN2_HUMAN	ACTN2	-0.266623	-5.01585	1.92337e-06	6.56268e-05
sp|Q9UEY8|ADDG_HUMAN	ADD3	0.192246	5.0159	1.92298e-06	6.56268e-05
sp|P06753-3|TPM3-3_HUMAN	TPM3	0.0890965	5.01494	1.93088e-06	6.56988e-05
sp|Q9H5N1|RABE2_HUMAN	RABEP2	0.108352	5.01274	1.94913e-06	6.59086e-05
sp|Q9UL46|PSME2_HUMAN	PSME2	0.191694	5.01284	1.94828e-06	6.59086e-05
tr|A0A0A0MSA4|A0A0A0MSA4_HUMAN	EPB41L3	-0.184833	-5.01223	1.95333e-06	6.59086e-05
sp|O14558|HSPB6_HUMAN	HSPB6	0.428479	5.00926	1.97829e-06	6.60171e-05
sp|P51812|KS6A3_HUMAN	RPS6KA3	0.0994518	5.01026	1.96986e-06	6.60171e-05
sp|Q9UNF1|MAGD2_HUMAN	MAGED2	0.211731	5.00952	1.97608e-06	6.60171e-05
sp|Q9Y6W5|WASF2_HUMAN	WASF2	0.276768	5.01078	1.9655e-06	6.60171e-05
sp|P01111|RASN_HUMAN	NRAS	-0.0930467	-5.00427	2.02086e-06	6.71493e-05
tr|H0YKN4|H0YKN4_HUMAN	ANXA2	0.600123	5.00399	2.02327e-06	6.71493e-05
sp|Q8N987|NECA1_HUMAN	NECAB1	-0.242456	-5.00317	2.0304e-06	6.72022e-05
sp|P49902|5NTC_HUMAN	NT5C2	0.188359	4.99882	2.06835e-06	6.82725e-05
sp|P04233-2|HG2A-2_HUMAN	CD74	0.397014	4.994	2.11126e-06	6.91475e-05
sp|P48059-3|LIMS1-3_HUMAN	LIMS1	0.253626	4.99436	2.10805e-06	6.91475e-05
sp|Q14CZ8-2|HECAM-2_HUMAN	HEPACAM	0.282571	4.99393	2.11194e-06	6.91475e-05
tr|F5H0N7|F5H0N7_HUMAN	CLIP1	0.0535953	4.99222	2.12733e-06	6.94642e-05
sp|P52566|GDIR2_HUMAN	ARHGDIB	0.292796	4.99108	2.13774e-06	6.96168e-05
tr|E9PND2|E9PND2_HUMAN	CSRP1	0.333265	4.98995	2.14805e-06	6.97657e-05
sp|O14617|AP3D1_HUMAN	AP3D1	-0.148289	-4.98817	2.16435e-06	7.01075e-05
sp|Q8TER5|ARH40_HUMAN	ARHGEF40	0.158914	4.98599	2.18456e-06	7.05741e-05
sp|Q15654|TRIP6_HUMAN	TRIP6	0.292426	4.98411	2.20214e-06	7.09534e-05
sp|O60826|CCD22_HUMAN	CCDC22	0.078983	4.98182	2.22364e-06	7.12678e-05
sp|Q9UIW2|PLXA1_HUMAN	PLXNA1	-0.183755	-4.98227	2.21945e-06	7.12678e-05
sp|P00966|ASSY_HUMAN	ASS1	0.307468	4.9812	2.22954e-06	7.12689e-05
sp|Q9Y4F5-2|C170B-2_HUMAN	CEP170B	-0.138095	-4.98039	2.23723e-06	7.13272e-05
sp|P41732|TSN7_HUMAN	TSPAN7	-0.291947	-4.97789	2.26119e-06	7.19023e-05
sp|O00182|LEG9_HUMAN	LGALS9	0.368071	4.97594	2.28e-06	7.23112e-05
sp|Q8IX04|UEVLD_HUMAN	UEVLD	0.19416	4.97141	2.32434e-06	7.35253e-05
sp|Q9Y2J2|E41L3_HUMAN	EPB41L3	-0.182789	-4.96774	2.36085e-06	7.44863e-05
sp|O00429-2|DNM1L-2_HUMAN	DNM1L	-0.127009	-4.96524	2.38606e-06	7.50866e-05
sp|O75874|IDHC_HUMAN	IDH1	0.18252	4.96283	2.41054e-06	7.54661e-05
sp|Q9BUF5|TBB6_HUMAN	TUBB6	-0.109466	-4.9631	2.40776e-06	7.54661e-05
sp|Q8IZD0|SAM14_HUMAN	SAMD14	-0.22736	-4.96201	2.41898e-06	7.55355e-05
sp|O14617-2|AP3D1-2_HUMAN	AP3D1	-0.144672	-4.95887	2.45138e-06	7.59496e-05
sp|P15056|BRAF_HUMAN	BRAF	-0.112195	-4.95889	2.45119e-06	7.59496e-05
sp|P23297|S10A1_HUMAN	S100A1	0.266269	4.95771	2.4635e-06	7.59496e-05
sp|Q9BZ67|FRMD8_HUMAN	FRMD8	0.217984	4.95775	2.46312e-06	7.59496e-05
tr|C9JTM0|C9JTM0_HUMAN	ADD2	-0.131337	-4.95794	2.46115e-06	7.59496e-05
sp|Q9C0B5|ZDHC5_HUMAN	ZDHHC5	-0.117271	-4.9568	2.473e-06	7.60493e-05
sp|P41586-3|PACR-3_HUMAN	ADCYAP1R1	0.255337	4.95414	2.50114e-06	7.67204e-05
sp|P35612|ADDB_HUMAN	ADD2	-0.136671	-4.95327	2.51034e-06	7.68088e-05
sp|O43772|MCAT_HUMAN	SLC25A20	0.171661	4.94955	2.55021e-06	7.78326e-05
sp|O14617-5|AP3D1-5_HUMAN	AP3D1	-0.146826	-4.94635	2.58503e-06	7.81685e-05
sp|P15311|EZRI_HUMAN	EZR	0.262806	4.94635	2.58509e-06	7.81685e-05
sp|Q01130|SRSF2_HUMAN	SRSF2	0.100828	4.94641	2.5844e-06	7.81685e-05
sp|Q8N126|CADM3_HUMAN	CADM3	-0.164578	-4.94618	2.58695e-06	7.81685e-05
sp|Q12765|SCRN1_HUMAN	SCRN1	0.103164	4.9436	2.61532e-06	7.88294e-05
sp|Q07157|ZO1_HUMAN	TJP1	0.180445	4.9402	2.65323e-06	7.97742e-05
sp|P11169|GTR3_HUMAN	SLC2A3	-0.215672	-4.93743	2.68462e-06	8.01935e-05
sp|P16144-2|ITB4-2_HUMAN	ITGB4	0.298268	4.93722	2.68698e-06	8.01935e-05
sp|Q96DG6|CMBL_HUMAN	CMBL	0.194153	4.93747	2.68412e-06	8.01935e-05
sp|Q15049|MLC1_HUMAN	MLC1	0.377029	4.93656	2.69444e-06	8.02189e-05
sp|O60749|SNX2_HUMAN	SNX2	0.0751592	4.93502	2.7121e-06	8.05474e-05
sp|O14745|NHRF1_HUMAN	SLC9A3R1	0.255586	4.93001	2.77013e-06	8.13311e-05
sp|P27338|AOFB_HUMAN	MAOB	0.309958	4.93139	2.7541e-06	8.13311e-05
sp|P62491|RB11A_HUMAN	RAB11A	0.0711117	4.93033	2.76637e-06	8.13311e-05
sp|Q08357|S20A2_HUMAN	SLC20A2	0.185142	4.93146	2.75321e-06	8.13311e-05
tr|A0A0A0MTC1|A0A0A0MTC1_HUMAN	RNF213	0.169145	4.92986	2.77197e-06	8.13311e-05
tr|H0YJ26|H0YJ26_HUMAN	ITGA7	0.449039	4.92907	2.78119e-06	8.1405e-05
sp|Q15404|RSU1_HUMAN	RSU1	0.232514	4.92597	2.81788e-06	8.15932e-05
sp|Q16881|TRXR1_HUMAN	TXNRD1	0.141182	4.92654	2.81109e-06	8.15932e-05
sp|Q6DN14|MCTP1_HUMAN	MCTP1	-0.206274	-4.92569	2.8212e-06	8.15932e-05
sp|Q9UI30|TR112_HUMAN	TRMT112	0.148322	4.92755	2.79913e-06	8.15932e-05
tr|H0YI08|H0YI08_HUMAN	MRVI1	0.344256	4.92681	2.80785e-06	8.15932e-05
tr|A0A2R8Y5J0|A0A2R8Y5J0_HUMAN	CHD4	0.101537	4.92507	2.82862e-06	8.16136e-05
sp|Q96G03|PGM2_HUMAN	PGM2	0.254124	4.91916	2.90008e-06	8.34771e-05
sp|Q8N5V2|NGEF_HUMAN	NGEF	-0.265371	-4.91808	2.91339e-06	8.34934e-05
tr|C9JQJ4|C9JQJ4_HUMAN	2023-09-02	0.229795	4.918	2.9144e-06	8.34934e-05
sp|O15357|SHIP2_HUMAN	INPPL1	0.140568	4.91484	2.95353e-06	8.42172e-05
sp|P31431|SDC4_HUMAN	SDC4	0.306078	4.91486	2.95325e-06	8.42172e-05
sp|O75936|BODG_HUMAN	BBOX1	0.394776	4.91117	2.99956e-06	8.49317e-05
sp|P42658|DPP6_HUMAN	DPP6	-0.231124	-4.91194	2.98995e-06	8.49317e-05
tr|G3V1L9|G3V1L9_HUMAN	TJP1	0.17968	4.9112	2.99922e-06	8.49317e-05
sp|Q15102|PA1B3_HUMAN	PAFAH1B3	0.206188	4.90828	3.03643e-06	8.57755e-05
tr|A0A1B0GUW4|A0A1B0GUW4_HUMAN	ASAH1	0.251018	4.90752	3.04615e-06	8.58504e-05
sp|Q8NEU8|DP13B_HUMAN	APPL2	0.177087	4.90646	3.05976e-06	8.60344e-05
sp|Q9H2M9|RBGPR_HUMAN	RAB3GAP2	-0.0783974	-4.90317	3.10251e-06	8.7035e-05
sp|P16144-3|ITB4-3_HUMAN	ITGB4	0.292471	4.90214	3.11609e-06	8.72147e-05
tr|H0YLM8|H0YLM8_HUMAN	DMXL2	-0.163112	-4.89916	3.15545e-06	8.81133e-05
sp|P06753-2|TPM3-2_HUMAN	TPM3	0.134183	4.89759	3.17635e-06	8.82908e-05
sp|P27544|CERS1_HUMAN	CERS1	0.217417	4.89784	3.17307e-06	8.82908e-05
sp|P42658-2|DPP6-2_HUMAN	DPP6	-0.232935	-4.89654	3.1904e-06	8.84789e-05
sp|Q15165|PON2_HUMAN	PON2	0.278969	4.89512	3.20958e-06	8.8808e-05
sp|Q9NYL9|TMOD3_HUMAN	TMOD3	0.219995	4.89312	3.23667e-06	8.93541e-05
sp|Q9Y243|AKT3_HUMAN	AKT3	-0.0936838	-4.88301	3.37734e-06	9.30263e-05
sp|Q15287|RNPS1_HUMAN	RNPS1	0.14971	4.88194	3.39259e-06	9.32348e-05
sp|P49841|GSK3B_HUMAN	GSK3B	-0.120814	-4.87969	3.42477e-06	9.39068e-05
sp|P49841-2|GSK3B-2_HUMAN	GSK3B	-0.120015	-4.87787	3.45117e-06	9.44175e-05
sp|Q6U841-2|S4A10-2_HUMAN	SLC4A10	-0.319701	-4.87539	3.48722e-06	9.50869e-05
sp|Q96AG3|S2546_HUMAN	SLC25A46	-0.156123	-4.87512	3.4913e-06	9.50869e-05
tr|H0YDE5|H0YDE5_HUMAN	KIAA1549L	-0.222587	-4.87429	3.50342e-06	9.52037e-05
sp|Q9HC98|NEK6_HUMAN	NEK6	0.282351	4.87291	3.52379e-06	9.55435e-05
sp|Q9Y4J8-10|DTNA-10_HUMAN	DTNA	0.36584	4.87232	3.53248e-06	9.55656e-05
sp|P19838|NFKB1_HUMAN	NFKB1	0.187647	4.86842	3.59088e-06	9.69284e-05
sp|Q7RTV0|PHF5A_HUMAN	PHF5A	0.135089	4.86789	3.59881e-06	9.69284e-05
sp|Q16799-3|RTN1-3_HUMAN	RTN1	-0.156368	-4.86636	3.6221e-06	9.73399e-05
sp|O94813-2|SLIT2-2_HUMAN	SLIT2	0.19054	4.86405	3.65724e-06	9.80673e-05
sp|P41586|PACR_HUMAN	ADCYAP1R1	0.268335	4.86211	3.68717e-06	9.86522e-05
sp|Q06323|PSME1_HUMAN	PSME1	0.196836	4.85562	3.78897e-06	0.000101153
sp|P41219|PERI_HUMAN	PRPH	0.502952	4.85079	3.86637e-06	0.000102768
sp|Q9NUV9|GIMA4_HUMAN	GIMAP4	0.195151	4.8511	3.86126e-06	0.000102768
sp|P48552|NRIP1_HUMAN	NRIP1	0.579393	4.84893	3.89653e-06	0.000103343
tr|A0A0A0MTP6|A0A0A0MTP6_HUMAN	INPPL1	0.140792	4.84765	3.9176e-06	0.000103675
sp|Q6UX71|PXDC2_HUMAN	PLXDC2	0.222479	4.84469	3.96637e-06	0.000104738
sp|P53634|CATC_HUMAN	CTSC	0.290257	4.84247	4.00333e-06	0.000105256
sp|Q5VU43|MYOME_HUMAN	PDE4DIP	0.141527	4.84264	4.00054e-06	0.000105256
sp|P28070|PSB4_HUMAN	PSMB4	0.0936722	4.84018	4.0419e-06	0.000106041
sp|Q9UHB6|LIMA1_HUMAN	LIMA1	0.214041	4.83828	4.07415e-06	0.000106657
sp|P07099|HYEP_HUMAN	EPHX1	0.255885	4.83727	4.09141e-06	0.000106878
sp|P27544-2|CERS1-2_HUMAN	CERS1	0.214448	4.834	4.14778e-06	0.000107617
sp|P33121|ACSL1_HUMAN	ACSL1	0.119885	4.83357	4.15514e-06	0.000107617
sp|Q9UKV3|ACINU_HUMAN	ACIN1	0.128384	4.83424	4.14351e-06	0.000107617
tr|A6NL93|A6NL93_HUMAN	HMGN1	0.253314	4.83396	4.14837e-06	0.000107617
sp|O75170|PP6R2_HUMAN	PPP6R2	-0.0875386	-4.83198	4.18292e-06	0.000108106
sp|Q6U841|S4A10_HUMAN	SLC4A10	-0.305659	-4.83072	4.20504e-06	0.000108447
sp|P60880-2|SNP25-2_HUMAN	SNAP25	-0.145852	-4.82992	4.21914e-06	0.00010858
sp|Q13418|ILK_HUMAN	ILK	0.26272	4.82715	4.26815e-06	0.000109609
sp|P18754|RCC1_HUMAN	RCC1	0.154484	4.82523	4.30249e-06	0.000110258
sp|Q08495-2|DEMA-2_HUMAN	DMTN	-0.141101	-4.82263	4.34944e-06	0.000111227
sp|P06733|ENOA_HUMAN	ENO1	0.142322	4.8189	4.41773e-06	0.000112719
sp|Q9UBC5|MYO1A_HUMAN	MYO1A	0.280254	4.81843	4.42634e-06	0.000112719
tr|E7EQT4|E7EQT4_HUMAN	ACIN1	0.126771	4.81577	4.47584e-06	0.000113741
sp|Q6IQ23|PKHA7_HUMAN	PLEKHA7	0.335507	4.81322	4.52364e-06	0.000114715
sp|Q9UH99|SUN2_HUMAN	SUN2	0.265891	4.8122	4.54296e-06	0.000114965
sp|Q8TCT9-2|HM13-2_HUMAN	HM13	0.169136	4.81013	4.58221e-06	0.000115718
sp|O15488|GLYG2_HUMAN	GYG2	0.480892	4.80854	4.6128e-06	0.000116085
sp|Q8TD55|PKHO2_HUMAN	PLEKHO2	0.192597	4.80838	4.61587e-06	0.000116085
sp|Q6IQ23-2|PKHA7-2_HUMAN	PLEKHA7	0.331582	4.80521	4.6772e-06	0.000117384
sp|Q9Y265|RUVB1_HUMAN	RUVBL1	0.139833	4.80388	4.70308e-06	0.00011779
sp|P04233|HG2A_HUMAN	CD74	0.370996	4.80047	4.77034e-06	0.000119229
sp|Q68CZ2|TENS3_HUMAN	TNS3	0.240306	4.79945	4.79062e-06	0.00011949
sp|Q8NEL9-4|DDHD1-4_HUMAN	DDHD1	-0.127463	-4.79654	4.84908e-06	0.0001207
sp|Q01970|PLCB3_HUMAN	PLCB3	0.124909	4.79255	4.93017e-06	0.000122468
sp|P02747|C1QC_HUMAN	C1QC	0.443867	4.79053	4.97168e-06	0.000123247
sp|Q29RF7|PDS5A_HUMAN	PDS5A	0.150434	4.78538	5.07942e-06	0.000125661
sp|Q8IYJ1|CPNE9_HUMAN	CPNE9	-0.230778	-4.78466	5.09448e-06	0.000125778
tr|A0A1B0GU03|A0A1B0GU03_HUMAN	NA	0.18542	4.78275	5.1352e-06	0.000126526
sp|O95232|LC7L3_HUMAN	LUC7L3	0.168137	4.78073	5.17845e-06	0.000127076
tr|H0YKB1|H0YKB1_HUMAN	TJP1	0.187111	4.78094	5.17382e-06	0.000127076
sp|Q07157-2|ZO1-2_HUMAN	TJP1	0.174211	4.77959	5.20303e-06	0.000127422
tr|A0A1B0GU92|A0A1B0GU92_HUMAN	NA	0.184801	4.77884	5.2191e-06	0.000127558
sp|Q99719-2|SEPT5-2_HUMAN	2023-09-05	-0.205174	-4.77724	5.254e-06	0.000127916
sp|Q9UHD2|TBK1_HUMAN	TBK1	-0.0845418	-4.77675	5.26474e-06	0.000127916
tr|A0A0U1RRM6|A0A0U1RRM6_HUMAN	ENAH	0.169378	4.77672	5.26534e-06	0.000127916
sp|Q15042-3|RB3GP-3_HUMAN	RAB3GAP1	-0.0793942	-4.77554	5.29122e-06	0.000128193
sp|Q9Y2J8|PADI2_HUMAN	PADI2	0.369664	4.77524	5.29784e-06	0.000128193
sp|P51648|AL3A2_HUMAN	ALDH3A2	0.183004	4.77307	5.34565e-06	0.000129093
sp|Q9BQS8|FYCO1_HUMAN	FYCO1	0.179742	4.77231	5.36247e-06	0.000129242
sp|O75061|AUXI_HUMAN	DNAJC6	-0.133778	-4.77085	5.39516e-06	0.000129772
sp|Q5SRE7|PHYD1_HUMAN	PHYHD1	0.437286	4.76971	5.42062e-06	0.00012987
tr|C9JPK3|C9JPK3_HUMAN	STXBP5L	-0.152538	-4.77006	5.41277e-06	0.00012987
sp|P15586|GNS_HUMAN	GNS	0.174457	4.76901	5.43653e-06	0.000129995
sp|P23229-2|ITA6-2_HUMAN	ITGA6	0.289712	4.76627	5.49862e-06	0.000130536
sp|P46108|CRK_HUMAN	CRK	0.106444	4.76601	5.50451e-06	0.000130536
sp|Q8TEH3|DEN1A_HUMAN	DENND1A	-0.112285	-4.76664	5.49014e-06	0.000130536
sp|Q9NQ86|TRI36_HUMAN	TRIM36	-0.19679	-4.76564	5.51289e-06	0.000130536
sp|Q9Y4J8|DTNA_HUMAN	DTNA	0.284914	4.76606	5.50338e-06	0.000130536
tr|A0A087WVF8|A0A087WVF8_HUMAN	PDE4DIP	0.134981	4.76508	5.52564e-06	0.000130583
sp|Q8NFI3|ENASE_HUMAN	ENGASE	0.240993	4.76212	5.59395e-06	0.000131941
sp|O15455|TLR3_HUMAN	TLR3	0.247487	4.76051	5.63142e-06	0.000132568
sp|O15031|PLXB2_HUMAN	PLXNB2	0.192364	4.76003	5.64257e-06	0.000132573
sp|Q13287|NMI_HUMAN	NMI	0.240036	4.75778	5.69542e-06	0.000133504
tr|E7ENQ8|E7ENQ8_HUMAN	PGM2	0.245117	4.75741	5.70417e-06	0.000133504
sp|Q3ZCW2|LEGL_HUMAN	LGALSL	-0.128948	-4.75571	5.74443e-06	0.000134188
sp|O43719|HTSF1_HUMAN	HTATSF1	0.143435	4.75417	5.78118e-06	0.000134529
sp|Q9UKV3-5|ACINU-5_HUMAN	ACIN1	0.125049	4.7545	5.77312e-06	0.000134529
sp|P41586-2|PACR-2_HUMAN	ADCYAP1R1	0.285556	4.75249	5.8214e-06	0.000134691
sp|Q658P3-2|STEA3-2_HUMAN	STEAP3	0.483943	4.75256	5.81964e-06	0.000134691
sp|Q658P3|STEA3_HUMAN	STEAP3	0.483943	4.75256	5.81964e-06	0.000134691
sp|Q9NR22|ANM8_HUMAN	PRMT8	-0.172439	-4.74916	5.90225e-06	0.000136302
sp|P54764|EPHA4_HUMAN	EPHA4	-0.184136	-4.74812	5.92771e-06	0.00013663
sp|Q9ULH1|ASAP1_HUMAN	ASAP1	-0.119192	-4.74589	5.98257e-06	0.000137633
tr|E7EV07|E7EV07_HUMAN	ARHGEF4	0.152503	4.74527	5.99779e-06	0.000137722
sp|O15372|EIF3H_HUMAN	EIF3H	0.0849051	4.74423	6.02381e-06	0.000138059
sp|Q09028|RBBP4_HUMAN	RBBP4	0.118105	4.74349	6.04216e-06	0.000138219
sp|P00441|SODC_HUMAN	SOD1	0.121079	4.7409	6.10728e-06	0.000139184
sp|Q6QEF8-5|CORO6-5_HUMAN	CORO6	-0.154658	-4.74111	6.102e-06	0.000139184
sp|P21291|CSRP1_HUMAN	CSRP1	0.295862	4.73916	6.15122e-06	0.000139401
sp|Q9NZM3|ITSN2_HUMAN	ITSN2	-0.10143	-4.73967	6.1383e-06	0.000139401
tr|E9PKC0|E9PKC0_HUMAN	PLEKHA7	0.323175	4.73937	6.14593e-06	0.000139401
sp|P08758|ANXA5_HUMAN	ANXA5	0.360949	4.73697	6.20705e-06	0.000140143
sp|P27338-2|AOFB-2_HUMAN	MAOB	0.288659	4.73712	6.20329e-06	0.000140143
sp|Q13885|TBB2A_HUMAN	TUBB2A	-0.11798	-4.73603	6.23124e-06	0.000140428
sp|P16591|FER_HUMAN	FER	0.156103	4.73402	6.28319e-06	0.000140882
sp|Q8N8S7|ENAH_HUMAN	ENAH	0.165924	4.73301	6.30935e-06	0.000140882
tr|A0A140T9D6|A0A140T9D6_HUMAN	HLA-DPA1	0.550855	4.7347	6.2657e-06	0.000140882
tr|D6RB85|D6RB85_HUMAN	CANX	0.134978	4.7331	6.30718e-06	0.000140882
tr|E9PLY5|E9PLY5_HUMAN	MACF1	0.0842209	4.73331	6.30167e-06	0.000140882
tr|K7ELV2|K7ELV2_HUMAN	SEH1L	0.113727	4.73149	6.34913e-06	0.00014151
sp|P19022|CADH2_HUMAN	CDH2	0.102345	4.72949	6.40187e-06	0.000142424
sp|O15533|TPSN_HUMAN	TAPBP	0.268216	4.72829	6.43351e-06	0.000142759
sp|P40145|ADCY8_HUMAN	ADCY8	0.2163	4.72767	6.45001e-06	0.000142759
sp|Q15417|CNN3_HUMAN	CNN3	0.358578	4.72759	6.45217e-06	0.000142759
sp|Q08495|DEMA_HUMAN	DMTN	-0.141222	-4.72659	6.47885e-06	0.000142969
sp|Q2TBA0|KLH40_HUMAN	KLHL40	0.579787	4.72595	6.49593e-06	0.000142969
sp|Q93100-3|KPBB-3_HUMAN	PHKB	0.196479	4.72554	6.50698e-06	0.000142969
tr|C9JBG0|C9JBG0_HUMAN	RAB34	0.212582	4.72547	6.50874e-06	0.000142969
sp|Q13485|SMAD4_HUMAN	SMAD4	0.176372	4.7229	6.57817e-06	0.000144233
sp|O00629|IMA3_HUMAN	KPNA4	0.093615	4.71864	6.69462e-06	0.00014583
sp|P36959|GMPR1_HUMAN	GMPR	0.468657	4.71924	6.67819e-06	0.00014583
sp|Q8N8S7-2|ENAH-2_HUMAN	ENAH	0.16763	4.71848	6.69904e-06	0.00014583
tr|G3V213|G3V213_HUMAN	AK2	0.201488	4.71903	6.68378e-06	0.00014583
tr|A0A0B4J269|A0A0B4J269_HUMAN	NA	-0.100579	-4.71581	6.773e-06	0.000147176
sp|Q14CZ8|HECAM_HUMAN	HEPACAM	0.288928	4.7145	6.80975e-06	0.000147711
sp|Q9BRZ2|TRI56_HUMAN	TRIM56	0.166964	4.71332	6.84283e-06	0.000148164
sp|P25789|PSA4_HUMAN	PSMA4	0.0997783	4.71197	6.88117e-06	0.000148668
sp|Q9UPY8|MARE3_HUMAN	MAPRE3	-0.117635	-4.71163	6.89058e-06	0.000148668
tr|A0A1B0GVG2|A0A1B0GVG2_HUMAN	ASAH1	0.221991	4.71053	6.92201e-06	0.000149081
sp|O75368|SH3L1_HUMAN	SH3BGRL	0.193561	4.70962	6.94778e-06	0.000149371
sp|B9EJG8|T150C_HUMAN	TMEM150C	0.269655	4.70816	6.98991e-06	0.000149601
sp|P61619|S61A1_HUMAN	SEC61A1	0.139103	4.70796	6.99542e-06	0.000149601
sp|Q8N3E9|PLCD3_HUMAN	PLCD3	0.26379	4.70833	6.98476e-06	0.000149601
sp|O43426|SYNJ1_HUMAN	SYNJ1	-0.121798	-4.70501	7.0809e-06	0.000151163
sp|Q63HN8|RN213_HUMAN	RNF213	0.165087	4.70437	7.09955e-06	0.000151295
sp|Q96HD1|CREL1_HUMAN	CRELD1	-0.1481	-4.70281	7.1453e-06	0.000151738
sp|Q99719|SEPT5_HUMAN	2023-09-05	-0.203997	-4.70295	7.14106e-06	0.000151738
sp|O00299|CLIC1_HUMAN	CLIC1	0.470392	4.70172	7.17731e-06	0.000152151
sp|Q9UQ16-3|DYN3-3_HUMAN	DNM3	-0.111054	-4.70014	7.22408e-06	0.000152876
sp|Q9ULZ3|ASC_HUMAN	PYCARD	0.259863	4.69951	7.24294e-06	0.000153009
sp|P18846|ATF1_HUMAN	ATF1	0.220419	4.69833	7.27808e-06	0.000153484
sp|P24557|THAS_HUMAN	TBXAS1	0.251057	4.69699	7.31815e-06	0.000154062
sp|P01911|2B1F_HUMAN	HLA-DRB1	0.538229	4.69458	7.39102e-06	0.000155326
sp|Q16666|IF16_HUMAN	IFI16	0.276653	4.69337	7.42778e-06	0.000155829
sp|Q04828|AK1C1_HUMAN	AKR1C1	0.390605	4.6917	7.47887e-06	0.000156631
sp|P08559|ODPA_HUMAN	PDHA1	-0.154996	-4.69097	7.50135e-06	0.000156831
sp|Q9HCB6|SPON1_HUMAN	SPON1	0.197348	4.68999	7.53159e-06	0.000157193
sp|O43312|MTSS1_HUMAN	MTSS1	0.160679	4.68658	7.6377e-06	0.000158861
sp|O60331|PI51C_HUMAN	PIP5K1C	-0.14469	-4.68682	7.63024e-06	0.000158861
sp|Q92688|AN32B_HUMAN	ANP32B	0.183277	4.68612	7.65227e-06	0.000158892
sp|O60331-3|PI51C-3_HUMAN	PIP5K1C	-0.144327	-4.68342	7.73739e-06	0.000160386
sp|Q13615|MTMR3_HUMAN	MTMR3	0.106114	4.68193	7.7848e-06	0.00016082
tr|G3XAH0|G3XAH0_HUMAN	2023-09-05	-0.200001	-4.68222	7.77578e-06	0.00016082
sp|P29692|EF1D_HUMAN	EEF1D	0.0969058	4.68145	7.80013e-06	0.000160863
sp|Q96FV9|THOC1_HUMAN	THOC1	0.127693	4.67972	7.8559e-06	0.000161738
sp|Q16816|PHKG1_HUMAN	PHKG1	0.276935	4.67659	7.95705e-06	0.000163544
sp|Q9BXC9|BBS2_HUMAN	BBS2	0.166558	4.67486	8.01387e-06	0.000164433
sp|Q9BXB4|OSB11_HUMAN	OSBPL11	0.16313	4.67275	8.08334e-06	0.000165389
tr|H7BYH4|H7BYH4_HUMAN	SOD1	0.119602	4.67262	8.08766e-06	0.000165389
sp|Q8N3V7-2|SYNPO-2_HUMAN	SYNPO	-0.264945	-4.67192	8.11093e-06	0.000165586
sp|Q9H6R3|ACSS3_HUMAN	ACSS3	0.191616	4.6691	8.20498e-06	0.000167225
sp|Q9BZG1|RAB34_HUMAN	RAB34	0.21348	4.66556	8.32472e-06	0.000169381
sp|P11177|ODPB_HUMAN	PDHB	-0.140865	-4.66281	8.41883e-06	0.000170724
tr|C9IZD3|C9IZD3_HUMAN	ARHGAP17	0.226161	4.66301	8.41214e-06	0.000170724
tr|H0YCK7|H0YCK7_HUMAN	EEF1D	0.0890223	4.66218	8.44058e-06	0.00017088
sp|Q96JJ3|ELMO2_HUMAN	ELMO2	0.1495	4.65981	8.52277e-06	0.000172256
sp|Q8TBA6|GOGA5_HUMAN	GOLGA5	0.0953847	4.65783	8.59212e-06	0.00017337
sp|P07355|ANXA2_HUMAN	ANXA2	0.554527	4.65712	8.6171e-06	0.000173503
sp|P45985|MP2K4_HUMAN	MAP2K4	-0.105101	-4.65679	8.62868e-06	0.000173503
sp|Q08495-4|DEMA-4_HUMAN	DMTN	-0.138944	-4.65643	8.64161e-06	0.000173503
sp|Q68EM7|RHG17_HUMAN	ARHGAP17	0.193518	4.6556	8.67071e-06	0.000173801
sp|Q13126|MTAP_HUMAN	MTAP	0.183635	4.6528	8.77052e-06	0.000175511
sp|P30536|TSPO_HUMAN	TSPO	0.319865	4.65014	8.86644e-06	0.000176848
sp|P49802|RGS7_HUMAN	RGS7	-0.183186	-4.65046	8.85487e-06	0.000176848
sp|Q9UI32|GLSL_HUMAN	GLS2	-0.197816	-4.64783	8.95056e-06	0.000178233
tr|E9PDI2|E9PDI2_HUMAN	CAP2	-0.148008	-4.64701	8.98027e-06	0.000178532
sp|P23229|ITA6_HUMAN	ITGA6	0.285441	4.64525	9.04512e-06	0.000179528
sp|P07437|TBB5_HUMAN	TUBB	-0.110938	-4.64333	9.11637e-06	0.000180136
sp|Q13509|TBB3_HUMAN	TUBB3	-0.0991216	-4.64315	9.1229e-06	0.000180136
sp|Q5TDH0|DDI2_HUMAN	DDI2	-0.105225	-4.64317	9.12223e-06	0.000180136
tr|H7C310|H7C310_HUMAN	2023-09-02	0.193429	4.64283	9.13505e-06	0.000180136
tr|Q5JUV4|Q5JUV4_HUMAN	NT5C2	0.18001	4.64199	9.16628e-06	0.000180458
sp|Q6NV74|K121L_HUMAN	KIAA1211L	-0.209259	-4.64155	9.18288e-06	0.000180493
sp|Q15599|NHRF2_HUMAN	SLC9A3R2	0.147716	4.64113	9.19829e-06	0.000180503
sp|P06733-2|ENOA-2_HUMAN	ENO1	0.129969	4.63806	9.31449e-06	0.000182195
sp|Q8N3U4|STAG2_HUMAN	STAG2	0.197513	4.63831	9.30497e-06	0.000182195
sp|P48444|COPD_HUMAN	ARCN1	0.0669161	4.63703	9.35353e-06	0.000182665
sp|P61764|STXB1_HUMAN	STXBP1	-0.203098	-4.63618	9.38615e-06	0.000183007
sp|Q9UPN3-3|MACF1-3_HUMAN	MACF1	0.0846645	4.6349	9.43492e-06	0.000183663
tr|F5H3G8|F5H3G8_HUMAN	STARD10	0.135228	4.63389	9.47383e-06	0.000184126
sp|P10620|MGST1_HUMAN	MGST1	0.351267	4.63082	9.5933e-06	0.000184722
sp|P49721|PSB2_HUMAN	PSMB2	0.0845552	4.63149	9.56694e-06	0.000184722
sp|Q6P1A2|MBOA5_HUMAN	LPCAT3	0.203426	4.63104	9.58459e-06	0.000184722
sp|Q7L5N7|PCAT2_HUMAN	LPCAT2	0.254788	4.63104	9.58466e-06	0.000184722
sp|Q99567|NUP88_HUMAN	NUP88	0.127562	4.63076	9.59576e-06	0.000184722
sp|Q9BR76|COR1B_HUMAN	CORO1B	0.166517	4.63253	9.5265e-06	0.000184722
sp|Q15599-3|NHRF2-3_HUMAN	SLC9A3R2	0.162694	4.62778	9.71281e-06	0.000186569
sp|Q86Y33|CD20B_HUMAN	CDC20B	0.604715	4.62754	9.72241e-06	0.000186569
sp|Q5TZA2|CROCC_HUMAN	CROCC	0.134189	4.62673	9.75416e-06	0.000186883
sp|P50579|MAP2_HUMAN	METAP2	0.121106	4.62501	9.82295e-06	0.0001877
sp|Q96JA1|LRIG1_HUMAN	LRIG1	0.196504	4.62489	9.82771e-06	0.0001877
sp|Q86WG5|MTMRD_HUMAN	SBF2	0.127705	4.62435	9.84931e-06	0.000187817
sp|O43347|MSI1H_HUMAN	MSI1	0.212448	4.62231	9.93136e-06	0.000188496
sp|P28066|PSA5_HUMAN	PSMA5	0.0775647	4.62235	9.92977e-06	0.000188496
sp|Q14678|KANK1_HUMAN	KANK1	0.157527	4.62222	9.93486e-06	0.000188496
sp|Q9NTI5|PDS5B_HUMAN	PDS5B	0.140764	4.62192	9.94698e-06	0.000188496
sp|P11766|ADHX_HUMAN	ADH5	0.221922	4.62042	1.0008e-05	0.000188727
sp|P40123|CAP2_HUMAN	CAP2	-0.139422	-4.62043	1.00078e-05	0.000188727
sp|P53609|PGTB1_HUMAN	PGGT1B	0.215288	4.62019	1.00174e-05	0.000188727
sp|P54819|KAD2_HUMAN	AK2	0.176427	4.62009	1.00213e-05	0.000188727
sp|P12004|PCNA_HUMAN	PCNA	0.175479	4.6197	1.00374e-05	0.000188737
sp|Q14019|COTL1_HUMAN	COTL1	0.272068	4.6188	1.00743e-05	0.000189138
sp|P23193|TCEA1_HUMAN	TCEA1	0.17339	4.61513	1.02255e-05	0.000190797
sp|Q15418|KS6A1_HUMAN	RPS6KA1	0.130527	4.61562	1.02054e-05	0.000190797
sp|Q8TAA3-2|PSMA8-2_HUMAN	PSMA8	0.116694	4.61558	1.02071e-05	0.000190797
sp|Q8WZA0|LZIC_HUMAN	LZIC	0.199926	4.61548	1.02113e-05	0.000190797
tr|B4DUC8|B4DUC8_HUMAN	MTAP	0.180376	4.61343	1.02965e-05	0.000191827
sp|P55289|CAD12_HUMAN	CDH12	-0.188687	-4.61202	1.03559e-05	0.000192456
sp|Q9Y2W1|TR150_HUMAN	THRAP3	0.104634	4.61187	1.03619e-05	0.000192456
sp|Q96CX2|KCD12_HUMAN	KCTD12	0.171846	4.61002	1.04401e-05	0.000193613
sp|Q5JTV8|TOIP1_HUMAN	TOR1AIP1	0.121944	4.60817	1.05189e-05	0.000194519
sp|Q8N3U4-2|STAG2-2_HUMAN	STAG2	0.194516	4.60812	1.0521e-05	0.000194519
sp|O75061-2|AUXI-2_HUMAN	DNAJC6	-0.132207	-4.60625	1.06013e-05	0.000195409
sp|Q96CW1|AP2M1_HUMAN	AP2M1	-0.131063	-4.60661	1.05859e-05	0.000195409
sp|Q03113|GNA12_HUMAN	GNA12	0.177252	4.60578	1.06214e-05	0.000195483
sp|Q96KG7|MEG10_HUMAN	MEGF10	0.156622	4.60316	1.07352e-05	0.000197278
tr|A0A1B0GVC9|A0A1B0GVC9_HUMAN	ASAH1	0.212944	4.60137	1.08135e-05	0.000198416
sp|P04229|2B11_HUMAN	HLA-DRB1	0.407198	4.60091	1.08334e-05	0.000198482
sp|P46019|KPB2_HUMAN	PHKA2	0.142559	4.60034	1.08585e-05	0.000198642
sp|O60641-3|AP180-3_HUMAN	SNAP91	-0.147958	-4.59794	1.0965e-05	0.000200288
sp|Q9UBX1|CATF_HUMAN	CTSF	0.211786	4.59684	1.10137e-05	0.000200876
sp|Q14314|FGL2_HUMAN	FGL2	0.422358	4.59593	1.10543e-05	0.000201014
tr|E9PSI1|E9PSI1_HUMAN	NA	0.195642	4.59605	1.10491e-05	0.000201014
sp|O95199|RCBT2_HUMAN	RCBTB2	0.26959	4.59442	1.11223e-05	0.000201928
sp|Q99613|EIF3C_HUMAN	EIF3C	0.0624211	4.59408	1.11379e-05	0.000201928
sp|O00192|ARVC_HUMAN	ARVCF	0.216759	4.59272	1.11994e-05	0.000202741
sp|Q2Y0W8|S4A8_HUMAN	SLC4A8	-0.215297	-4.59227	1.12197e-05	0.000202806
sp|P55263|ADK_HUMAN	ADK	0.139833	4.59182	1.12401e-05	0.000202874
sp|O75170-2|PP6R2-2_HUMAN	PPP6R2	-0.0824965	-4.59005	1.13209e-05	0.000203216
sp|Q8NBF2|NHLC2_HUMAN	NHLRC2	0.197244	4.59071	1.12909e-05	0.000203216
sp|Q9Y4E6|WDR7_HUMAN	WDR7	-0.130851	-4.58993	1.13266e-05	0.000203216
tr|C9JXD6|C9JXD6_HUMAN	KIAA1211L	-0.183959	-4.58958	1.13428e-05	0.000203216
tr|K7ES63|K7ES63_HUMAN	TUBB6	-0.138511	-4.59002	1.13227e-05	0.000203216
sp|P17516|AK1C4_HUMAN	AKR1C4	0.451976	4.58747	1.14402e-05	0.000204659
sp|P50135|HNMT_HUMAN	HNMT	0.435119	4.58606	1.15057e-05	0.000205529
sp|P35414|APJ_HUMAN	APLNR	0.535644	4.58326	1.16365e-05	0.000207021
sp|Q8WXH0|SYNE2_HUMAN	SYNE2	0.12518	4.58353	1.16238e-05	0.000207021
tr|A0A1B0GVQ5|A0A1B0GVQ5_HUMAN	STXBP1	-0.200763	-4.58318	1.16403e-05	0.000207021
sp|O75914|PAK3_HUMAN	PAK3	-0.131796	-4.58255	1.16703e-05	0.000207249
tr|C9JQS3|C9JQS3_HUMAN	STXBP5L	-0.129627	-4.58176	1.17075e-05	0.000207607
sp|P06756|ITAV_HUMAN	ITGAV	0.116105	4.57982	1.17998e-05	0.00020894
sp|Q9UPV7|PHF24_HUMAN	PHF24	-0.184897	-4.57652	1.19583e-05	0.000211437
sp|P06703|S10A6_HUMAN	S100A6	0.525166	4.57578	1.19942e-05	0.000211764
sp|O95782|AP2A1_HUMAN	AP2A1	-0.132772	-4.57354	1.21031e-05	0.000213377
sp|Q9UL54|TAOK2_HUMAN	TAOK2	-0.0916576	-4.57249	1.21549e-05	0.00021398
sp|P43405|KSYK_HUMAN	SYK	0.253079	4.57039	1.22582e-05	0.000215381
tr|A0A0J9YYL3|A0A0J9YYL3_HUMAN	PUF60	0.0975214	4.57015	1.227e-05	0.000215381
sp|A8MUU1|FB5L3_HUMAN	FABP5P3	0.413522	4.56832	1.23611e-05	0.000216666
sp|P27815-7|PDE4A-7_HUMAN	PDE4A	-0.144119	-4.56652	1.24515e-05	0.000217619
sp|Q9NRN5|OLFL3_HUMAN	OLFML3	0.683285	4.56617	1.24691e-05	0.000217619
sp|Q9UPN3-2|MACF1-2_HUMAN	MACF1	0.0834464	4.56676	1.24393e-05	0.000217619
sp|P49961|ENTP1_HUMAN	ENTPD1	0.245111	4.56514	1.2521e-05	0.000217898
sp|Q96FQ6|S10AG_HUMAN	S100A16	0.183455	4.56522	1.25169e-05	0.000217898
sp|P50454|SERPH_HUMAN	SERPINH1	0.30198	4.56334	1.26125e-05	0.000219176
sp|P02792|FRIL_HUMAN	FTL	0.542667	4.56038	1.2764e-05	0.000221427
sp|Q9Y3S1|WNK2_HUMAN	WNK2	-0.0760957	-4.5601	1.27785e-05	0.000221427
sp|P13796|PLSL_HUMAN	LCP1	0.25986	4.55746	1.29152e-05	0.000223477
sp|Q8WZA9|IRGQ_HUMAN	IRGQ	-0.154536	-4.55496	1.3046e-05	0.000225419
tr|H0YBI4|H0YBI4_HUMAN	PDLIM5	0.291864	4.55018	1.32997e-05	0.000229477
sp|P35222|CTNB1_HUMAN	CTNNB1	0.0970951	4.54969	1.33258e-05	0.000229601
sp|Q96TA1|NIBL1_HUMAN	FAM129B	0.225178	4.54912	1.3357e-05	0.000229812
sp|Q13951-2|PEBB-2_HUMAN	CBFB	0.202897	4.54806	1.34141e-05	0.000230468
sp|O95758-4|PTBP3-4_HUMAN	PTBP3	0.214416	4.54764	1.34369e-05	0.000230533
sp|Q5VTR2|BRE1A_HUMAN	RNF20	0.102445	4.54679	1.34824e-05	0.000230989
sp|P07339|CATD_HUMAN	CTSD	0.173858	4.54242	1.37222e-05	0.000234766
sp|Q6DN14-3|MCTP1-3_HUMAN	MCTP1	-0.192321	-4.54177	1.37578e-05	0.000235044
sp|Q92952|KCNN1_HUMAN	KCNN1	0.300291	4.54116	1.37918e-05	0.000235293
sp|P52790|HXK3_HUMAN	HK3	-0.172518	-4.53885	1.39206e-05	0.000237158
sp|P16144-5|ITB4-5_HUMAN	ITGB4	0.27012	4.53709	1.40197e-05	0.000238351
sp|P49802-2|RGS7-2_HUMAN	RGS7	-0.182229	-4.53656	1.40495e-05	0.000238351
tr|E9PFI2|E9PFI2_HUMAN	STXBP5L	-0.134045	-4.53684	1.40338e-05	0.000238351
sp|P60880|SNP25_HUMAN	SNAP25	-0.153114	-4.53571	1.40975e-05	0.000238498
sp|Q9HCM2|PLXA4_HUMAN	PLXNA4	-0.141626	-4.53572	1.40971e-05	0.000238498
sp|Q9Y6M7-13|S4A7-13_HUMAN	SLC4A7	-0.264531	-4.53523	1.41249e-05	0.000238631
sp|P15121|ALDR_HUMAN	AKR1B1	0.12952	4.53397	1.41965e-05	0.000239175
sp|Q9NP72|RAB18_HUMAN	RAB18	-0.082224	-4.53426	1.418e-05	0.000239175
sp|O00461|GOLI4_HUMAN	GOLIM4	0.204342	4.53325	1.42377e-05	0.000239205
sp|Q8N3V7|SYNPO_HUMAN	SYNPO	-0.263459	-4.5333	1.4235e-05	0.000239205
sp|Q9NVZ3|NECP2_HUMAN	NECAP2	0.254483	4.5329	1.42576e-05	0.000239208
sp|P25325|THTM_HUMAN	MPST	0.168544	4.53203	1.43076e-05	0.000239416
sp|Q6UX53|MET7B_HUMAN	METTL7B	0.33827	4.532	1.43094e-05	0.000239416
sp|O94906|PRP6_HUMAN	PRPF6	0.0986062	4.52987	1.44324e-05	0.000240811
tr|J3KN66|J3KN66_HUMAN	TOR1AIP1	0.119486	4.53013	1.44174e-05	0.000240811
sp|P27815|PDE4A_HUMAN	PDE4A	-0.138733	-4.52413	1.47688e-05	0.000245216
sp|Q2TB90-2|HKDC1-2_HUMAN	HKDC1	-0.198532	-4.52399	1.47771e-05	0.000245216
sp|Q9HAC8|UBTD1_HUMAN	UBTD1	0.143831	4.52465	1.47384e-05	0.000245216
tr|C9IZ88|C9IZ88_HUMAN	CTNNA2	0.201423	4.52444	1.47508e-05	0.000245216
sp|O43815|STRN_HUMAN	STRN	-0.0702898	-4.52309	1.48307e-05	0.000245224
sp|Q969P0|IGSF8_HUMAN	IGSF8	-0.131657	-4.52333	1.48166e-05	0.000245224
sp|Q9Y678|COPG1_HUMAN	COPG1	0.0678536	4.52296	1.48382e-05	0.000245224
sp|O60678|ANM3_HUMAN	PRMT3	0.195166	4.52209	1.48906e-05	0.000245756
sp|Q8TCT9|HM13_HUMAN	HM13	0.163245	4.52131	1.49371e-05	0.000246189
tr|A0A3F2YNY6|A0A3F2YNY6_HUMAN	PRPF40A	0.119946	4.52079	1.4968e-05	0.000246364
tr|E9PQ49|E9PQ49_HUMAN	EEF1D	0.0908514	4.51901	1.50755e-05	0.000247798
sp|Q9BQ04|RBM4B_HUMAN	RBM4B	0.109668	4.51827	1.51202e-05	0.000248195
sp|Q9Y512|SAM50_HUMAN	SAMM50	-0.0995656	-4.5178	1.51491e-05	0.00024829
tr|C9IY94|C9IY94_HUMAN	2023-09-02	0.203326	4.51717	1.51872e-05	0.00024829
tr|M0QZM1|M0QZM1_HUMAN	HNRNPM	0.109481	4.51738	1.51746e-05	0.00024829
sp|Q9P2R3|ANFY1_HUMAN	ANKFY1	0.125861	4.51554	1.52867e-05	0.00024958
sp|Q9UQ16-2|DYN3-2_HUMAN	DNM3	-0.1107	-4.51472	1.53374e-05	0.000249737
tr|E9PF55|E9PF55_HUMAN	TNS1	0.210855	4.51502	1.53189e-05	0.000249737
sp|Q9NZ52|GGA3_HUMAN	GGA3	-0.126338	-4.51351	1.54119e-05	0.000250614
sp|P53041|PPP5_HUMAN	PPP5C	-0.0943859	-4.51009	1.56248e-05	0.000253736
sp|Q16143|SYUB_HUMAN	SNCB	-0.212514	-4.50926	1.56768e-05	0.000254241
sp|P46108-2|CRK-2_HUMAN	CRK	0.0960237	4.50806	1.57521e-05	0.000254781
sp|Q9BVA1|TBB2B_HUMAN	TUBB2B	-0.113423	-4.50816	1.5746e-05	0.000254781
sp|Q96P48-1|ARAP1-1_HUMAN	ARAP1	0.135407	4.50691	1.58247e-05	0.000255616
sp|Q4KMP7|TB10B_HUMAN	TBC1D10B	-0.0945455	-4.50302	1.60734e-05	0.000259165
sp|Q6YN16|HSDL2_HUMAN	HSDL2	0.137655	4.5028	1.60871e-05	0.000259165
sp|P52895|AK1C2_HUMAN	AKR1C2	0.376062	4.50197	1.61407e-05	0.00025934
sp|Q8NE62|CHDH_HUMAN	CHDH	0.234124	4.50214	1.613e-05	0.00025934
tr|F8W785|F8W785_HUMAN	GOLIM4	0.198739	4.50153	1.61696e-05	0.000259461
sp|O14964|HGS_HUMAN	HGS	-0.0657999	-4.50045	1.62393e-05	0.000260111
sp|P17931|LEG3_HUMAN	LGALS3	0.31173	4.50024	1.62529e-05	0.000260111
sp|P37235|HPCL1_HUMAN	HPCAL1	-0.196171	-4.49872	1.63521e-05	0.000261355
tr|H0YJP2|H0YJP2_HUMAN	KTN1	0.150755	4.49453	1.66289e-05	0.000265429
tr|C9J4Z0|C9J4Z0_HUMAN	SLC22A23	-0.179467	-4.49214	1.67882e-05	0.00026762
sp|Q8WUA2|PPIL4_HUMAN	PPIL4	0.0989663	4.49157	1.68265e-05	0.000267879
sp|P10620-2|MGST1-2_HUMAN	MGST1	0.381951	4.48861	1.70268e-05	0.000270359
tr|A0A1B0GVV9|A0A1B0GVV9_HUMAN	STXBP1	-0.182929	-4.48872	1.70195e-05	0.000270359
sp|Q12860|CNTN1_HUMAN	CNTN1	-0.10599	-4.48667	1.71592e-05	0.000272105
sp|O00505|IMA4_HUMAN	KPNA3	0.0939783	4.48437	1.73175e-05	0.0002739
sp|Q7Z3B1|NEGR1_HUMAN	NEGR1	-0.178681	-4.4844	1.73152e-05	0.0002739
sp|Q6FI81|CPIN1_HUMAN	CIAPIN1	-0.0948831	-4.48157	1.75121e-05	0.000276619
sp|Q9NQX7|ITM2C_HUMAN	ITM2C	0.173001	4.47772	1.77837e-05	0.000280544
sp|O60741|HCN1_HUMAN	HCN1	-0.175803	-4.47731	1.78122e-05	0.000280628
sp|Q9UQ16|DYN3_HUMAN	DNM3	-0.115225	-4.4765	1.78699e-05	0.000281172
sp|O00154|BACH_HUMAN	ACOT7	-0.0939772	-4.47613	1.78963e-05	0.000281225
sp|Q14980|NUMA1_HUMAN	NUMA1	0.195632	4.47466	1.80021e-05	0.000282156
sp|Q9P2A4|ABI3_HUMAN	ABI3	0.219743	4.47473	1.79967e-05	0.000282156
sp|Q9Y2K9|STB5L_HUMAN	STXBP5L	-0.133932	-4.47423	1.80328e-05	0.000282273
sp|Q8WUM4|PDC6I_HUMAN	PDCD6IP	-0.0791736	-4.4738	1.80636e-05	0.000282392
sp|P28799|GRN_HUMAN	GRN	0.286173	4.47269	1.81435e-05	0.000283072
sp|Q8N283|ANR35_HUMAN	ANKRD35	0.189325	4.47255	1.81537e-05	0.000283072
sp|O14810|CPLX1_HUMAN	CPLX1	-0.291127	-4.47042	1.83083e-05	0.000285117
tr|D6RGE5|D6RGE5_HUMAN	CSNK1A1	0.17201	4.46922	1.83967e-05	0.000286126
sp|Q4V328-3|GRAP1-3_HUMAN	GRIPAP1	-0.119107	-4.46757	1.8518e-05	0.000287645
sp|P24298|ALAT1_HUMAN	GPT	0.239437	4.46721	1.85442e-05	0.000287683
sp|Q9UBB9|TFP11_HUMAN	TFIP11	0.0982271	4.46571	1.86553e-05	0.000289038
sp|Q8IWZ3|ANKH1_HUMAN	ANKHD1	0.0933253	4.4645	1.87454e-05	0.000290065
sp|Q8IXQ6|PARP9_HUMAN	PARP9	0.25489	4.46023	1.90672e-05	0.000293966
tr|B5MEG9|B5MEG9_HUMAN	MAP4	0.200127	4.46019	1.90702e-05	0.000293966
tr|E9PLY0|E9PLY0_HUMAN	MACF1	0.0813476	4.46074	1.90284e-05	0.000293966
sp|Q8IWE2|NXP20_HUMAN	FAM114A1	0.218574	4.45932	1.91357e-05	0.000294229
sp|Q8IZD9|DOCK3_HUMAN	DOCK3	-0.100986	-4.45961	1.9114e-05	0.000294229
sp|P60903|S10AA_HUMAN	S100A10	0.664045	4.45803	1.92342e-05	0.00029537
sp|Q93100|KPBB_HUMAN	PHKB	0.188425	4.45765	1.92636e-05	0.000295449
sp|Q9UFW8|CGBP1_HUMAN	CGGBP1	0.168188	4.45645	1.93561e-05	0.000296492
sp|Q15119|PDK2_HUMAN	PDK2	-0.129411	-4.4549	1.94753e-05	0.000297568
sp|Q96HS1|PGAM5_HUMAN	PGAM5	-0.15341	-4.45515	1.9456e-05	0.000297568
sp|Q8IXQ6-2|PARP9-2_HUMAN	PARP9	0.25425	4.45366	1.95717e-05	0.000298665
sp|P58107|EPIPL_HUMAN	EPPK1	0.228564	4.45287	1.96333e-05	0.000298855
tr|A0A3B3ISZ5|A0A3B3ISZ5_HUMAN	TJP2	0.371235	4.4531	1.9615e-05	0.000298855
tr|A0A3F2YNY5|A0A3F2YNY5_HUMAN	KCNN2	0.293342	4.45206	1.96969e-05	0.000299448
sp|Q86UX7|URP2_HUMAN	FERMT3	0.260582	4.45159	1.97335e-05	0.000299629
sp|P35659|DEK_HUMAN	DEK	0.19714	4.44859	1.99705e-05	0.000302848
sp|Q14344|GNA13_HUMAN	GNA13	0.214747	4.44718	2.00825e-05	0.000304167
sp|P84074|HPCA_HUMAN	HPCA	-0.215469	-4.44396	2.03406e-05	0.000306547
sp|Q9UDY2|ZO2_HUMAN	TJP2	0.366	4.44426	2.03161e-05	0.000306547
sp|Q9UJ70|NAGK_HUMAN	NAGK	0.134173	4.44414	2.03259e-05	0.000306547
tr|F5GY40|F5GY40_HUMAN	NDUFA9	-0.159613	-4.44463	2.02866e-05	0.000306547
tr|A0A3B3ITE1|A0A3B3ITE1_HUMAN	TJP2	0.371062	4.4427	2.04429e-05	0.000307708
sp|O94811|TPPP_HUMAN	TPPP	-0.16232	-4.44157	2.05349e-05	0.00030871
sp|Q9NP61|ARFG3_HUMAN	ARFGAP3	0.114729	4.43861	2.07777e-05	0.000311973
sp|P51570-2|GALK1-2_HUMAN	GALK1	0.202631	4.43641	2.09597e-05	0.000314319
sp|O43301|HS12A_HUMAN	HSPA12A	-0.123633	-4.43599	2.09941e-05	0.000314446
sp|P50461|CSRP3_HUMAN	CSRP3	0.382841	4.43206	2.13237e-05	0.000317447
sp|P60900|PSA6_HUMAN	PSMA6	0.0861325	4.43205	2.13252e-05	0.000317447
sp|Q9P0V9|SEP10_HUMAN	2023-09-10	0.256341	4.43237	2.12976e-05	0.000317447
tr|H7C1V0|H7C1V0_HUMAN	CTSD	0.165652	4.43225	2.1308e-05	0.000317447
tr|K7ERB2|K7ERB2_HUMAN	AP2B1	-0.135741	-4.43221	2.1311e-05	0.000317447
sp|O00584|RNT2_HUMAN	RNASET2	0.237219	4.43085	2.14263e-05	0.000318562
sp|P40939|ECHA_HUMAN	HADHA	0.206087	4.42876	2.16045e-05	0.000320766
sp|Q05086|UBE3A_HUMAN	UBE3A	-0.0746325	-4.4285	2.16273e-05	0.000320766
sp|Q10567|AP1B1_HUMAN	AP1B1	-0.110478	-4.42742	2.17198e-05	0.000321744
sp|O00754|MA2B1_HUMAN	MAN2B1	0.171563	4.42606	2.18373e-05	0.000323091
sp|P42330|AK1C3_HUMAN	AKR1C3	0.37357	4.42519	2.19123e-05	0.000323805
sp|O14879|IFIT3_HUMAN	IFIT3	0.291431	4.42333	2.20741e-05	0.000325801
sp|P67809|YBOX1_HUMAN	YBX1	0.255964	4.42216	2.21766e-05	0.000326742
sp|Q08499-11|PDE4D-11_HUMAN	PDE4D	-0.162498	-4.42199	2.21917e-05	0.000326742
sp|P33241|LSP1_HUMAN	LSP1	0.374107	4.4202	2.23491e-05	0.000328662
tr|H0YNP5|H0YNP5_HUMAN	ANXA2	0.528008	4.41988	2.23775e-05	0.000328682
tr|H7BZ56|H7BZ56_HUMAN	SYNJ1	-0.180782	-4.41874	2.24791e-05	0.000329774
sp|Q99613-2|EIF3C-2_HUMAN	EIF3C	0.0604042	4.41703	2.26319e-05	0.000331616
sp|Q99418|CYH2_HUMAN	CYTH2	-0.121353	-4.4145	2.28592e-05	0.000334543
sp|Q9BY43|CHM4A_HUMAN	CHMP4A	0.202892	4.41338	2.29604e-05	0.00033562
sp|O60306|AQR_HUMAN	AQR	0.105607	4.41273	2.302e-05	0.000336086
sp|Q8WXF7|ATLA1_HUMAN	ATL1	-0.115728	-4.41035	2.32373e-05	0.000338445
tr|A0A087WU36|A0A087WU36_HUMAN	PLXNB2	0.214598	4.41046	2.3227e-05	0.000338445
sp|Q8N584|TT39C_HUMAN	TTC39C	-0.12955	-4.40943	2.33215e-05	0.000339265
sp|Q9P2P5|HECW2_HUMAN	HECW2	-0.118495	-4.40842	2.3415e-05	0.000340218
sp|Q7Z4H8|PLGT3_HUMAN	KDELC2	0.294863	4.40542	2.36938e-05	0.000343857
sp|Q15042|RB3GP_HUMAN	RAB3GAP1	-0.0708377	-4.40426	2.38026e-05	0.000345024
tr|E9PLX0|E9PLX0_HUMAN	CAPN1	0.117852	4.40173	2.40422e-05	0.000348082
tr|A0A075B6E5|A0A075B6E5_HUMAN	ENAH	0.16472	4.40031	2.41768e-05	0.000349613
sp|P34947|GRK5_HUMAN	GRK5	-0.122299	-4.39957	2.42474e-05	0.000349802
sp|Q6H8Q1-6|ABLM2-6_HUMAN	ABLIM2	-0.163922	-4.3997	2.4235e-05	0.000349802
sp|Q14116|IL18_HUMAN	IL18	0.349429	4.39867	2.4334e-05	0.000350634
sp|Q13490|BIRC2_HUMAN	BIRC2	-0.0944479	-4.39632	2.45603e-05	0.000353477
sp|P51570|GALK1_HUMAN	GALK1	0.205287	4.39579	2.46114e-05	0.000353792
sp|O60641|AP180_HUMAN	SNAP91	-0.138921	-4.39515	2.46744e-05	0.000354279
sp|P55884|EIF3B_HUMAN	EIF3B	0.0698908	4.39463	2.47247e-05	0.000354582
sp|Q13884|SNTB1_HUMAN	SNTB1	0.269921	4.39368	2.48177e-05	0.000355497
sp|A6NCS6|CB072_HUMAN	C2orf72	0.23109	4.39178	2.50042e-05	0.000356905
sp|P37840|SYUA_HUMAN	SNCA	-0.216899	-4.39237	2.4946e-05	0.000356905
sp|Q9Y6G9|DC1L1_HUMAN	DYNC1LI1	-0.0839571	-4.39199	2.49835e-05	0.000356905
sp|Q6QNY0|BL1S3_HUMAN	BLOC1S3	0.124714	4.39138	2.50434e-05	0.000357045
sp|P34741|SDC2_HUMAN	SDC2	0.274043	4.39077	2.5104e-05	0.000357489
tr|A0A0D9SGG3|A0A0D9SGG3_HUMAN	KCNQ2	-0.159772	-4.38706	2.5473e-05	0.000362319
sp|P04406-2|G3P-2_HUMAN	GAPDH	0.07716	4.38667	2.55124e-05	0.000362455
sp|Q9BQI5|SGIP1_HUMAN	SGIP1	-0.153191	-4.38565	2.56151e-05	0.000363489
sp|Q8IUZ5|AT2L2_HUMAN	PHYKPL	0.237822	4.38432	2.57492e-05	0.000364966
sp|P48050|KCNJ4_HUMAN	KCNJ4	-0.235013	-4.38401	2.57812e-05	0.000364994
sp|A6NGN9|IGLO5_HUMAN	IGLON5	-0.169059	-4.38331	2.58519e-05	0.000365568
sp|Q9HBL0|TENS1_HUMAN	TNS1	0.204974	4.38069	2.61203e-05	0.000368935
sp|Q99666|RGPD5_HUMAN	RGPD5	0.111656	4.37944	2.62486e-05	0.000370316
tr|A0A3B3IU51|A0A3B3IU51_HUMAN	TJP2	0.364403	4.37576	2.66319e-05	0.000374873
tr|C9J4A7|C9J4A7_HUMAN	NA	0.213999	4.37574	2.66334e-05	0.000374873
sp|P01116-2|RASK-2_HUMAN	KRAS	-0.101397	-4.37308	2.69132e-05	0.000377936
sp|P38919|IF4A3_HUMAN	EIF4A3	0.118241	4.37312	2.69095e-05	0.000377936
tr|D6RAL0|D6RAL0_HUMAN	ABLIM2	-0.20586	-4.37164	2.70663e-05	0.000379647
sp|P42263|GRIA3_HUMAN	GRIA3	-0.215356	-4.37055	2.71829e-05	0.000380404
tr|A0A2R8YE50|A0A2R8YE50_HUMAN	PRKG1	0.267651	4.37084	2.71517e-05	0.000380404
sp|O75937|DNJC8_HUMAN	DNAJC8	0.123315	4.36849	2.74032e-05	0.000381989
sp|P07948-2|LYN-2_HUMAN	LYN	0.173754	4.36898	2.73508e-05	0.000381989
sp|P30876|RPB2_HUMAN	POLR2B	0.10993	4.36803	2.74534e-05	0.000381989
sp|Q96CM8|ACSF2_HUMAN	ACSF2	0.188549	4.36812	2.74438e-05	0.000381989
sp|Q9P258|RCC2_HUMAN	RCC2	0.159746	4.36817	2.74375e-05	0.000381989
sp|O75821|EIF3G_HUMAN	EIF3G	0.0924033	4.3675	2.75099e-05	0.000382337
sp|B2RPK0|HGB1A_HUMAN	HMGB1P1	0.216541	4.3657	2.77057e-05	0.000382462
sp|P20340|RAB6A_HUMAN	RAB6A	0.0906203	4.36452	2.78338e-05	0.000382462
sp|Q15746|MYLK_HUMAN	MYLK	0.267321	4.36527	2.77518e-05	0.000382462
sp|Q53TN4|CYBR1_HUMAN	CYBRD1	0.275587	4.36521	2.77587e-05	0.000382462
sp|Q96BR5|COA7_HUMAN	COA7	-0.196115	-4.36618	2.76533e-05	0.000382462
sp|Q9NTX5|ECHD1_HUMAN	ECHDC1	0.210126	4.36458	2.78278e-05	0.000382462
sp|Q9UI15|TAGL3_HUMAN	TAGLN3	-0.171405	-4.36668	2.75994e-05	0.000382462
tr|A0A087WZM2|A0A087WZM2_HUMAN	RNASET2	0.231921	4.36666	2.76015e-05	0.000382462
tr|H0Y5B0|H0Y5B0_HUMAN	EPB41L2	0.207673	4.36471	2.78131e-05	0.000382462
tr|H0YDE9|H0YDE9_HUMAN	AP2A2	-0.120509	-4.36591	2.7683e-05	0.000382462
sp|Q9Y508|RN114_HUMAN	RNF114	0.190777	4.36422	2.78665e-05	0.000382479
sp|Q12959-9|DLG1-9_HUMAN	DLG1	-0.0931759	-4.3625	2.80552e-05	0.000384635
sp|Q6ZVM7-5|TM1L2-5_HUMAN	TOM1L2	-0.1084	-4.36168	2.81455e-05	0.000385391
sp|Q9GZM8|NDEL1_HUMAN	NDEL1	-0.118108	-4.36143	2.81738e-05	0.000385391
tr|U3KPV7|U3KPV7_HUMAN	REEP1	-0.18291	-4.36078	2.82451e-05	0.000385931
sp|A6NNZ2|TBB8L_HUMAN	NA	-0.120978	-4.35987	2.8346e-05	0.00038608
sp|Q9H2S1|KCNN2_HUMAN	KCNN2	0.28864	4.35983	2.83513e-05	0.00038608
tr|A0A1B0GTF3|A0A1B0GTF3_HUMAN	HSPA12A	-0.122416	-4.35984	2.83502e-05	0.00038608
sp|P25325-2|THTM-2_HUMAN	MPST	0.163416	4.35905	2.84378e-05	0.000386824
sp|Q9UHX1|PUF60_HUMAN	PUF60	0.0945571	4.35784	2.85727e-05	0.000388224
sp|P26368|U2AF2_HUMAN	U2AF2	0.0956983	4.35715	2.86505e-05	0.000388412
sp|Q16515|ASIC2_HUMAN	ASIC2	-0.162972	-4.35739	2.86241e-05	0.000388412
sp|P26374|RAE2_HUMAN	CHML	-0.18276	-4.35533	2.88557e-05	0.000390322
sp|Q5VU43-13|MYOME-13_HUMAN	PDE4DIP	0.127321	4.35534	2.88546e-05	0.000390322
sp|Q6H8Q1-2|ABLM2-2_HUMAN	ABLIM2	-0.166971	-4.35364	2.90474e-05	0.000392479
sp|Q86VM9|ZCH18_HUMAN	ZC3H18	0.12249	4.35329	2.9087e-05	0.000392577
sp|P07948|LYN_HUMAN	LYN	0.170357	4.35246	2.91819e-05	0.000393421
sp|Q96RR4|KKCC2_HUMAN	CAMKK2	-0.237554	-4.35064	2.93905e-05	0.000395356
sp|Q9ULR3|PPM1H_HUMAN	PPM1H	-0.136781	-4.35078	2.93749e-05	0.000395356
sp|P46976|GLYG_HUMAN	GYG1	0.247359	4.34832	2.96595e-05	0.000398534
sp|P46063|RECQ1_HUMAN	RECQL	0.184696	4.3474	2.97664e-05	0.000399528
sp|P09429|HMGB1_HUMAN	HMGB1	0.205112	4.3454	3e-05	0.000401774
sp|Q9H4B7|TBB1_HUMAN	TUBB1	-0.105233	-4.34559	2.99778e-05	0.000401774
sp|Q96ME1-4|FXL18-4_HUMAN	FBXL18	-0.110205	-4.34339	3.0237e-05	0.000404503
sp|O75582|KS6A5_HUMAN	RPS6KA5	0.200917	4.34195	3.04079e-05	0.000406004
sp|Q9NZL9|MAT2B_HUMAN	MAT2B	0.0674769	4.34188	3.0416e-05	0.000406004
sp|P53677|AP3M2_HUMAN	AP3M2	-0.135484	-4.34099	3.05223e-05	0.000406976
sp|Q9NRX4|PHP14_HUMAN	PHPT1	0.178046	4.33844	3.08285e-05	0.000410158
tr|Q5JSK9|Q5JSK9_HUMAN	HMGN5	0.225185	4.33855	3.08152e-05	0.000410158
sp|Q6AZY7|SCAR3_HUMAN	SCARA3	0.287489	4.33699	3.10044e-05	0.000412046
sp|Q6PJT7|ZC3HE_HUMAN	ZC3H14	0.112479	4.33656	3.1056e-05	0.000412281
sp|P04080|CYTB_HUMAN	CSTB	0.15918	4.33511	3.12329e-05	0.000413726
tr|H7C5K3|H7C5K3_HUMAN	BRAF	-0.145082	-4.33535	3.12033e-05	0.000413726
sp|Q96DU7|IP3KC_HUMAN	ITPKC	0.255382	4.33215	3.15958e-05	0.000418076
sp|Q6H8Q1|ABLM2_HUMAN	ABLIM2	-0.164423	-4.33187	3.16304e-05	0.000418078
sp|P04406|G3P_HUMAN	GAPDH	0.078547	4.33094	3.17453e-05	0.000419141
sp|Q10567-3|AP1B1-3_HUMAN	AP1B1	-0.1086	-4.32738	3.21901e-05	0.000424553
sp|P55286|CADH8_HUMAN	CDH8	-0.19315	-4.32666	3.22801e-05	0.000425278
sp|Q96RR4-7|KKCC2-7_HUMAN	CAMKK2	-0.239914	-4.32551	3.24263e-05	0.000426741
sp|Q9BTV4|TMM43_HUMAN	TMEM43	0.150231	4.32509	3.24786e-05	0.000426967
sp|P49840|GSK3A_HUMAN	GSK3A	-0.100191	-4.3236	3.26685e-05	0.000428999
sp|P61916|NPC2_HUMAN	NPC2	0.319958	4.31902	3.32573e-05	0.00043626
sp|Q16623|STX1A_HUMAN	STX1A	-0.22329	-4.31658	3.35756e-05	0.00043996
sp|Q7Z4I7|LIMS2_HUMAN	LIMS2	0.238394	4.31446	3.38535e-05	0.000443124
sp|O95990|F107A_HUMAN	FAM107A	0.502794	4.31418	3.38911e-05	0.000443137
sp|O94973|AP2A2_HUMAN	AP2A2	-0.12232	-4.31374	3.3949e-05	0.000443417
sp|Q8NBM8|PCYXL_HUMAN	PCYOX1L	-0.186835	-4.31253	3.41097e-05	0.000444561
tr|C9JRG3|C9JRG3_HUMAN	DNPEP	0.332732	4.31258	3.41027e-05	0.000444561
sp|Q6F5E8|CARL2_HUMAN	CARMIL2	-0.15083	-4.31166	3.42258e-05	0.000445596
tr|Q5JSD2|Q5JSD2_HUMAN	VDAC2	-0.137153	-4.3113	3.42737e-05	0.000445742
sp|Q9HBI1|PARVB_HUMAN	PARVB	0.239383	4.31071	3.43518e-05	0.000445963
sp|Q9UBR2|CATZ_HUMAN	CTSZ	0.353923	4.31062	3.43642e-05	0.000445963
sp|Q9Y2K5|R3HD2_HUMAN	R3HDM2	-0.148288	-4.30936	3.45325e-05	0.000447669
sp|Q96BX8|MOB3A_HUMAN	MOB3A	0.270322	4.30899	3.45827e-05	0.000447843
sp|Q8WVM7|STAG1_HUMAN	STAG1	0.146353	4.30843	3.46588e-05	0.00044824
tr|A0A087WX41|A0A087WX41_HUMAN	CLTCL1	-0.147482	-4.30794	3.47241e-05	0.00044824
tr|A0A286YFC8|A0A286YFC8_HUMAN	PHGDH	0.323011	4.30804	3.47112e-05	0.00044824
tr|H7BXZ5|H7BXZ5_HUMAN	KALRN	-0.103072	-4.30719	3.48266e-05	0.000449086
tr|A0A0D9SF10|A0A0D9SF10_HUMAN	KCNQ2	-0.149149	-4.30597	3.49924e-05	0.000450745
sp|P42263-2|GRIA3-2_HUMAN	GRIA3	-0.220194	-4.3044	3.5206e-05	0.000452729
sp|Q52LD8|RFTN2_HUMAN	RFTN2	0.207281	4.30429	3.5221e-05	0.000452729
sp|Q92529|SHC3_HUMAN	SHC3	-0.202498	-4.3022	3.55095e-05	0.000455474
sp|Q969T9|WBP2_HUMAN	WBP2	-0.158649	-4.30239	3.54829e-05	0.000455474
sp|O95336|6PGL_HUMAN	PGLS	0.170517	4.30106	3.5667e-05	0.000456682
sp|O95758|PTBP3_HUMAN	PTBP3	0.199468	4.3007	3.57164e-05	0.000456682
tr|M0QXQ4|M0QXQ4_HUMAN	NUMBL	-0.17804	-4.30088	3.56911e-05	0.000456682
sp|Q9BZF9|UACA_HUMAN	UACA	0.163385	4.29976	3.58477e-05	0.000457877
sp|O75369-8|FLNB-8_HUMAN	FLNB	0.286712	4.29866	3.60017e-05	0.000459161
tr|A0A2R8YCW1|A0A2R8YCW1_HUMAN	DDX3X	0.0940482	4.2985	3.60238e-05	0.000459161
sp|Q9Y6C2|EMIL1_HUMAN	EMILIN1	0.281478	4.29735	3.61847e-05	0.00046073
sp|Q86UP2-3|KTN1-3_HUMAN	KTN1	0.14061	4.29699	3.62356e-05	0.000460861
sp|Q96T17|MA7D2_HUMAN	MAP7D2	-0.167516	-4.29674	3.62709e-05	0.000460861
tr|A0A140T9B3|A0A140T9B3_HUMAN	HLA-C	0.316328	4.29518	3.64918e-05	0.000463182
sp|Q9Y6M7|S4A7_HUMAN	SLC4A7	-0.26473	-4.29378	3.66904e-05	0.000465217
tr|K7EIN1|K7EIN1_HUMAN	WBP2	-0.153589	-4.29245	3.68812e-05	0.000467149
sp|Q86UP2|KTN1_HUMAN	KTN1	0.141994	4.28985	3.72552e-05	0.000471395
sp|P26639|SYTC_HUMAN	TARS	0.106728	4.28936	3.73252e-05	0.000471789
sp|P53675|CLH2_HUMAN	CLTCL1	-0.141354	-4.28821	3.74923e-05	0.000472426
sp|Q7Z6L0|PRRT2_HUMAN	PRRT2	-0.206908	-4.28823	3.74893e-05	0.000472426
tr|C9JTK4|C9JTK4_HUMAN	AP2M1	-0.142943	-4.28867	3.74251e-05	0.000472426
sp|P06748-2|NPM-2_HUMAN	NPM1	0.10233	4.28635	3.77637e-05	0.000475353
sp|Q8N3C0|ASCC3_HUMAN	ASCC3	0.13103	4.28542	3.79003e-05	0.000476579
sp|Q9NZM1|MYOF_HUMAN	MYOF	0.322142	4.28447	3.80413e-05	0.000477858
sp|P49407|ARRB1_HUMAN	ARRB1	0.117602	4.28062	3.86135e-05	0.000484544
sp|Q12959|DLG1_HUMAN	DLG1	-0.0880235	-4.27993	3.8716e-05	0.000485329
sp|P57087|JAM2_HUMAN	JAM2	0.207278	4.27921	3.88242e-05	0.000486183
sp|Q96FJ0|STALP_HUMAN	STAMBPL1	-0.131163	-4.27609	3.9297e-05	0.000490587
sp|Q9UBS8|RNF14_HUMAN	RNF14	0.142859	4.27613	3.92911e-05	0.000490587
tr|H0YAP0|H0YAP0_HUMAN	ZC2HC1A	-0.212102	-4.27624	3.92737e-05	0.000490587
sp|O95865|DDAH2_HUMAN	DDAH2	0.215011	4.27472	3.95063e-05	0.000492188
sp|Q92625|ANS1A_HUMAN	ANKS1A	0.108612	4.27483	3.94888e-05	0.000492188
tr|A0A0J9YW26|A0A0J9YW26_HUMAN	EPB41L3	-0.184204	-4.27279	3.9802e-05	0.000495364
sp|O75369|FLNB_HUMAN	FLNB	0.284456	4.2725	3.9848e-05	0.000495428
sp|Q7Z422|SZRD1_HUMAN	SZRD1	0.129814	4.27206	3.99147e-05	0.00049575
sp|Q12923|PTN13_HUMAN	PTPN13	0.138649	4.27136	4.00233e-05	0.000496591
sp|Q92783|STAM1_HUMAN	STAM	-0.0846639	-4.27061	4.01398e-05	0.000497529
sp|Q7Z3C6|ATG9A_HUMAN	ATG9A	0.103258	4.26992	4.02479e-05	0.00049836
sp|Q9BTV7|CABL2_HUMAN	CABLES2	-0.168202	-4.26959	4.02984e-05	0.000498477
sp|P04350|TBB4A_HUMAN	TUBB4A	-0.107303	-4.26513	4.09996e-05	0.000506623
sp|Q5TC84|OGRL1_HUMAN	OGFRL1	0.209302	4.26488	4.10403e-05	0.000506623
sp|P01116|RASK_HUMAN	KRAS	-0.0954309	-4.26394	4.11888e-05	0.000507939
sp|Q8WWP7|GIMA1_HUMAN	GIMAP1	0.169545	4.26312	4.13204e-05	0.000508773
sp|Q9UKX3|MYH13_HUMAN	MYH13	0.583508	4.263	4.13401e-05	0.000508773
tr|A0A2R8Y4T1|A0A2R8Y4T1_HUMAN	TNS1	0.196156	4.26235	4.14442e-05	0.000509022
tr|G3V3D1|G3V3D1_HUMAN	NPC2	0.317036	4.26244	4.14292e-05	0.000509022
sp|O60229|KALRN_HUMAN	KALRN	-0.102506	-4.26046	4.17481e-05	0.000511363
sp|P46020-2|KPB1-2_HUMAN	PHKA1	0.200524	4.26046	4.17468e-05	0.000511363
sp|Q8N485|LIX1_HUMAN	LIX1	0.294462	4.26038	4.17611e-05	0.000511363
sp|Q96ME1|FXL18_HUMAN	FBXL18	-0.106418	-4.25951	4.19009e-05	0.000512558
sp|P55084|ECHB_HUMAN	HADHB	0.194954	4.25861	4.20479e-05	0.000513839
sp|Q9Y262|EIF3L_HUMAN	EIF3L	0.0757426	4.2582	4.2114e-05	0.000514129
sp|Q7Z4G1|COMD6_HUMAN	COMMD6	0.126517	4.25606	4.24638e-05	0.00051788
sp|P05114|HMGN1_HUMAN	HMGN1	0.223269	4.25446	4.2726e-05	0.000520554
sp|O43175|SERA_HUMAN	PHGDH	0.297908	4.25243	4.3063e-05	0.000524134
sp|O75431|MTX2_HUMAN	MTX2	-0.107827	-4.25193	4.31469e-05	0.000524416
sp|Q9ULI1|NWD2_HUMAN	NWD2	-0.176224	-4.25177	4.31724e-05	0.000524416
sp|Q9BY11|PACN1_HUMAN	PACSIN1	-0.160649	-4.25146	4.32249e-05	0.000524528
tr|E7ETC9|E7ETC9_HUMAN	CAMK2B	-0.1755	-4.2502	4.34347e-05	0.000526549
sp|O95470|SGPL1_HUMAN	SGPL1	0.18813	4.24608	4.4131e-05	0.000534456
sp|P20340-2|RAB6A-2_HUMAN	RAB6A	0.0865205	4.24458	4.43864e-05	0.000537014
tr|F8VUJ9|F8VUJ9_HUMAN	DNM1L	-0.163917	-4.24197	4.48356e-05	0.000541787
tr|H0Y7J9|H0Y7J9_HUMAN	WNK2	-0.0908488	-4.24177	4.48702e-05	0.000541787
sp|Q8TDJ6|DMXL2_HUMAN	DMXL2	-0.139202	-4.24052	4.50883e-05	0.00054388
sp|P57740|NU107_HUMAN	NUP107	0.0937889	4.23865	4.5414e-05	0.000547266
sp|P26232|CTNA2_HUMAN	CTNNA2	0.122096	4.23657	4.5778e-05	0.000551105
sp|P10523|ARRS_HUMAN	SAG	0.190481	4.23529	4.60056e-05	0.000553112
sp|P25787|PSA2_HUMAN	PSMA2	0.095238	4.23512	4.60357e-05	0.000553112
sp|Q99490|AGAP2_HUMAN	AGAP2	-0.149684	-4.23321	4.63752e-05	0.00055664
sp|O75643|U520_HUMAN	SNRNP200	0.0938066	4.23173	4.66396e-05	0.000558965
sp|Q8NC56|LEMD2_HUMAN	LEMD2	0.179744	4.23136	4.6707e-05	0.000558965
sp|Q96DA6|TIM14_HUMAN	DNAJC19	-0.134889	-4.23149	4.66833e-05	0.000558965
sp|Q9BTV5|FSD1_HUMAN	FSD1	-0.122013	-4.23092	4.67858e-05	0.000559358
sp|O75912|DGKI_HUMAN	DGKI	-0.132827	-4.22637	4.7612e-05	0.000568676
sp|Q96P48|ARAP1_HUMAN	ARAP1	0.14055	4.2236	4.81223e-05	0.000574206
sp|P46020|KPB1_HUMAN	PHKA1	0.19865	4.22294	4.82429e-05	0.000574516
tr|X6R3Y6|X6R3Y6_HUMAN	CDH8	-0.201338	-4.22316	4.82033e-05	0.000574516
sp|P68371|TBB4B_HUMAN	TUBB4B	-0.100074	-4.22129	4.85509e-05	0.000577618
sp|O75400|PR40A_HUMAN	PRPF40A	0.115785	4.22063	4.86735e-05	0.00057851
sp|O94915|FRYL_HUMAN	FRYL	0.130316	4.22005	4.87832e-05	0.000579247
sp|Q8TAQ2-2|SMRC2-2_HUMAN	SMARCC2	0.0820317	4.21888	4.90022e-05	0.000581279
sp|Q6QEF8|CORO6_HUMAN	CORO6	-0.141157	-4.21837	4.90978e-05	0.000581845
sp|P09917|LOX5_HUMAN	ALOX5	0.241226	4.21739	4.92833e-05	0.000583474
sp|P40926|MDHM_HUMAN	MDH2	-0.125231	-4.21593	4.95607e-05	0.000586186
sp|P63010|AP2B1_HUMAN	AP2B1	-0.117935	-4.21515	4.97091e-05	0.00058737
sp|Q15173|2A5B_HUMAN	PPP2R5B	-0.102621	-4.21432	4.98676e-05	0.00058867
sp|Q6DD88|ATLA3_HUMAN	ATL3	0.184742	4.21302	5.01181e-05	0.000591052
tr|B0QYH4|B0QYH4_HUMAN	SEZ6L	-0.163452	-4.21226	5.02646e-05	0.000591815
tr|H7C4C5|H7C4C5_HUMAN	MAP4	0.187707	4.21217	5.02802e-05	0.000591815
sp|O60674|JAK2_HUMAN	JAK2	0.104032	4.20901	5.08943e-05	0.000598464
sp|Q9NQL2|RRAGD_HUMAN	RRAGD	0.119716	4.2082	5.10523e-05	0.000599161
sp|Q9UQB8|BAIP2_HUMAN	BAIAP2	-0.184411	-4.20828	5.10361e-05	0.000599161
sp|P14317|HCLS1_HUMAN	HCLS1	0.244002	4.20572	5.15403e-05	0.000603141
sp|P50135-2|HNMT-2_HUMAN	HNMT	0.383545	4.20602	5.14812e-05	0.000603141
sp|Q7Z3J3|RGPD4_HUMAN	RGPD4	0.103656	4.20591	5.15022e-05	0.000603141
sp|Q70J99-3|UN13D-3_HUMAN	UNC13D	0.494057	4.20546	5.15917e-05	0.000603161
sp|P51798|CLCN7_HUMAN	CLCN7	0.10184	4.20389	5.19037e-05	0.000606225
sp|O75563|SKAP2_HUMAN	SKAP2	0.326403	4.20352	5.19771e-05	0.0006063
tr|A0A1W2PRB0|A0A1W2PRB0_HUMAN	KCNMA1	-0.121224	-4.20335	5.20099e-05	0.0006063
sp|P49116|NR2C2_HUMAN	NR2C2	0.121993	4.20135	5.24116e-05	0.000610397
tr|F8VZ52|F8VZ52_HUMAN	DNM1L	-0.136242	-4.20018	5.2646e-05	0.00061254
sp|Q3ZCM7|TBB8_HUMAN	TUBB8	-0.10926	-4.19713	5.32654e-05	0.000619153
sp|Q05084|ICA69_HUMAN	ICA1	-0.147361	-4.19643	5.34077e-05	0.000619621
sp|Q4V328|GRAP1_HUMAN	GRIPAP1	-0.103172	-4.19667	5.33587e-05	0.000619621
sp|P09601|HMOX1_HUMAN	HMOX1	0.208116	4.19603	5.34905e-05	0.000619989
sp|Q08170|SRSF4_HUMAN	SRSF4	0.105088	4.19555	5.35884e-05	0.000620532
tr|F5GYR0|F5GYR0_HUMAN	ABLIM2	-0.149189	-4.1951	5.36797e-05	0.000620997
sp|Q13228|SBP1_HUMAN	SELENBP1	0.283224	4.19393	5.39204e-05	0.000623188
tr|H0YBC6|H0YBC6_HUMAN	DNM3	-0.111379	-4.19357	5.39962e-05	0.000623472
sp|O15523|DDX3Y_HUMAN	DDX3Y	0.0862643	4.18874	5.50026e-05	0.000633887
sp|Q9HCD6|TANC2_HUMAN	TANC2	-0.105565	-4.18897	5.49535e-05	0.000633887
sp|Q9UHX1-3|PUF60-3_HUMAN	PUF60	0.0934097	4.18819	5.51176e-05	0.00063461
sp|P49792|RBP2_HUMAN	RANBP2	0.0972107	4.18587	5.56098e-05	0.000639671
sp|Q9NZH0|GPC5B_HUMAN	GPRC5B	0.277077	4.1856	5.56654e-05	0.000639705
tr|H7C1Y7|H7C1Y7_HUMAN	NDUFA10	-0.172127	-4.18425	5.59544e-05	0.000642418
sp|Q7Z5Q1|CPEB2_HUMAN	CPEB2	-0.0903169	-4.18244	5.63424e-05	0.000646262
sp|P49137|MAPK2_HUMAN	MAPKAPK2	0.185954	4.1821	5.64156e-05	0.000646491
sp|Q9HAU0-4|PKHA5-4_HUMAN	PLEKHA5	0.110391	4.17999	5.68726e-05	0.000651114
sp|P32321|DCTD_HUMAN	DCTD	0.246245	4.17792	5.73224e-05	0.000654661
sp|Q14155|ARHG7_HUMAN	ARHGEF7	-0.0963427	-4.17783	5.73441e-05	0.000654661
tr|A0A0J9YW33|A0A0J9YW33_HUMAN	STX3	0.175134	4.17825	5.72518e-05	0.000654661
sp|Q9HAU0|PKHA5_HUMAN	PLEKHA5	0.112194	4.17703	5.75194e-05	0.000655452
sp|Q9HB90|RRAGC_HUMAN	RRAGC	0.105923	4.17702	5.75214e-05	0.000655452
sp|P10768|ESTD_HUMAN	ESD	0.181032	4.17676	5.75784e-05	0.000655487
sp|P10301|RRAS_HUMAN	RRAS	0.199538	4.17588	5.7771e-05	0.000657063
sp|Q9BUT1|BDH2_HUMAN	BDH2	0.290605	4.17482	5.80061e-05	0.000659121
sp|Q5VZK9|CARL1_HUMAN	CARMIL1	0.0895661	4.1732	5.83641e-05	0.000662569
tr|A0A087WTJ2|A0A087WTJ2_HUMAN	GIMAP1-GIMAP5	0.184631	4.17272	5.84717e-05	0.000663171
sp|P62318|SMD3_HUMAN	SNRPD3	0.104393	4.1718	5.8677e-05	0.000664267
sp|Q13425|SNTB2_HUMAN	SNTB2	0.136215	4.17107	5.88418e-05	0.000664267
sp|Q14155-3|ARHG7-3_HUMAN	ARHGEF7	-0.0978252	-4.17108	5.8838e-05	0.000664267
sp|Q8IV38|ANKY2_HUMAN	ANKMY2	-0.131617	-4.17137	5.87739e-05	0.000664267
tr|A0A0G2JL56|A0A0G2JL56_HUMAN	HLA-A	0.328394	4.17148	5.87489e-05	0.000664267
sp|Q9H000|MKRN2_HUMAN	MKRN2	0.0902652	4.17076	5.89101e-05	0.000664421
sp|A6NKT7|RGPD3_HUMAN	RGPD3	0.106064	4.16792	5.95527e-05	0.000671045
sp|P35658|NU214_HUMAN	NUP214	0.0947348	4.16603	5.99827e-05	0.000675264
sp|Q7Z5K2|WAPL_HUMAN	WAPL	0.147702	4.16556	6.00898e-05	0.000675843
sp|Q8NBJ5|GT251_HUMAN	COLGALT1	0.121	4.16511	6.01928e-05	0.000676375
tr|H7BZC2|H7BZC2_HUMAN	SYNJ1	-0.122941	-4.16294	6.06927e-05	0.000681363
sp|Q9BUQ8|DDX23_HUMAN	DDX23	0.0977061	4.15983	6.14161e-05	0.000688847
sp|O96019|ACL6A_HUMAN	ACTL6A	0.117859	4.15913	6.15794e-05	0.000690041
sp|P00492|HPRT_HUMAN	HPRT1	-0.112027	-4.15873	6.16728e-05	0.000690451
sp|O00115|DNS2A_HUMAN	DNASE2	0.203181	4.15797	6.18528e-05	0.000691829
sp|P35579|MYH9_HUMAN	MYH9	0.12896	4.1566	6.21759e-05	0.000693634
sp|P51858|HDGF_HUMAN	HDGF	0.17599	4.15671	6.21486e-05	0.000693634
sp|Q9UPU3|SORC3_HUMAN	SORCS3	-0.158773	-4.15656	6.21855e-05	0.000693634
sp|P04083|ANXA1_HUMAN	ANXA1	0.621204	4.15471	6.26232e-05	0.000695244
sp|P09211|GSTP1_HUMAN	GSTP1	0.223726	4.15411	6.27679e-05	0.000695244
sp|Q5HYC2|K2026_HUMAN	KIAA2026	0.593945	4.15378	6.28446e-05	0.000695244
sp|Q99436|PSB7_HUMAN	PSMB7	0.0851639	4.15469	6.26288e-05	0.000695244
sp|Q9BXP5-3|SRRT-3_HUMAN	SRRT	0.104338	4.15409	6.27705e-05	0.000695244
tr|A0A0C4DFT3|A0A0C4DFT3_HUMAN	DLG1	-0.0914355	-4.15565	6.23998e-05	0.000695244
tr|E9PQZ1|E9PQZ1_HUMAN	EEF1D	0.083184	4.15419	6.27481e-05	0.000695244
tr|G3V2X9|G3V2X9_HUMAN	ACTN1	-0.203874	-4.15378	6.2845e-05	0.000695244
tr|K4JQN1|K4JQN1_HUMAN	BAX	0.115488	4.15525	6.2495e-05	0.000695244
sp|Q96IU4|ABHEB_HUMAN	ABHD14B	0.338866	4.15312	6.30035e-05	0.000696364
sp|Q9P1Z2|CACO1_HUMAN	CALCOCO1	-0.115576	-4.15215	6.32372e-05	0.000698311
sp|P12268|IMDH2_HUMAN	IMPDH2	0.147416	4.15185	6.33093e-05	0.000698472
sp|O00330|ODPX_HUMAN	PDHX	-0.144179	-4.15032	6.36769e-05	0.000701254
sp|O94905|ERLN2_HUMAN	ERLIN2	0.2287	4.1504	6.36587e-05	0.000701254
sp|O75683|SURF6_HUMAN	SURF6	-0.172271	-4.14819	6.41944e-05	0.000706312
sp|O14939|PLD2_HUMAN	PLD2	0.187314	4.14643	6.46255e-05	0.000708528
sp|P52272|HNRPM_HUMAN	HNRNPM	0.0952929	4.14666	6.45685e-05	0.000708528
sp|Q6F5E8-2|CARL2-2_HUMAN	CARMIL2	-0.145385	-4.14653	6.46004e-05	0.000708528
sp|Q96S66|CLCC1_HUMAN	CLCC1	0.131563	4.14642	6.4629e-05	0.000708528
sp|O75400-3|PR40A-3_HUMAN	PRPF40A	0.108159	4.14543	6.48725e-05	0.000710272
tr|C9J6P4|C9J6P4_HUMAN	ZC3HAV1	0.193061	4.1453	6.49051e-05	0.000710272
sp|P99999|CYC_HUMAN	CYCS	-0.165248	-4.1449	6.50028e-05	0.000710702
sp|Q9UJY5|GGA1_HUMAN	GGA1	-0.068084	-4.14436	6.5136e-05	0.000711517
sp|O75390|CISY_HUMAN	CS	-0.141558	-4.14201	6.57197e-05	0.000712766
sp|P18583-10|SON-10_HUMAN	SON	0.0989912	4.143	6.54731e-05	0.000712766
sp|P26583|HMGB2_HUMAN	HMGB2	0.206714	4.14256	6.5582e-05	0.000712766
sp|Q14693|LPIN1_HUMAN	LPIN1	0.121977	4.14203	6.57142e-05	0.000712766
sp|Q3SY69|AL1L2_HUMAN	ALDH1L2	0.221883	4.14266	6.55568e-05	0.000712766
sp|Q96I24|FUBP3_HUMAN	FUBP3	0.145252	4.14247	6.56054e-05	0.000712766
sp|Q9Y5Y2|NUBP2_HUMAN	NUBP2	0.171753	4.14316	6.54334e-05	0.000712766
tr|A0A1W2PNY9|A0A1W2PNY9_HUMAN	KCNMA1	-0.12089	-4.14356	6.53346e-05	0.000712766
sp|Q14738|2A5D_HUMAN	PPP2R5D	-0.0474264	-4.14127	6.59058e-05	0.00071352
sp|Q96B49|TOM6_HUMAN	TOMM6	-0.150284	-4.14094	6.59867e-05	0.00071352
sp|Q96NX5|KCC1G_HUMAN	CAMK1G	-0.207591	-4.14079	6.60242e-05	0.00071352
tr|E7EUY6|E7EUY6_HUMAN	ARHGEF7	-0.100691	-4.14107	6.5955e-05	0.00071352
tr|F8VVT9|F8VVT9_HUMAN	AGAP2	-0.141326	-4.14043	6.61138e-05	0.000713852
sp|O94826|TOM70_HUMAN	TOMM70	-0.114227	-4.13926	6.64104e-05	0.000715783
tr|E9PQ36|E9PQ36_HUMAN	SLC25A22	-0.194279	-4.13935	6.63864e-05	0.000715783
sp|P80723|BASP1_HUMAN	BASP1	-0.170138	-4.13892	6.64954e-05	0.000716063
sp|Q8WUM0|NU133_HUMAN	NUP133	0.0906624	4.13771	6.68017e-05	0.000718725
sp|O94973-2|AP2A2-2_HUMAN	AP2A2	-0.11792	-4.13503	6.74837e-05	0.000724779
sp|Q15233|NONO_HUMAN	NONO	0.0819041	4.13515	6.74537e-05	0.000724779
sp|O15540|FABP7_HUMAN	FABP7	0.301505	4.13473	6.75604e-05	0.000724961
tr|H0YJ05|H0YJ05_HUMAN	STON2	0.345274	4.1332	6.79537e-05	0.000728538
sp|P45880|VDAC2_HUMAN	VDAC2	-0.118151	-4.13263	6.80992e-05	0.000729454
sp|O15514|RPB4_HUMAN	POLR2D	0.146304	4.1317	6.83397e-05	0.000731385
sp|P53701|CCHL_HUMAN	HCCS	-0.113084	-4.13021	6.87263e-05	0.000734875
sp|Q14BN4-2|SLMAP-2_HUMAN	SLMAP	0.0838149	4.12932	6.89601e-05	0.000736727
tr|E7ENI6|E7ENI6_HUMAN	ICA1	-0.153987	-4.129	6.90436e-05	0.00073697
tr|J3KRD5|J3KRD5_HUMAN	CNDP2	0.197855	4.12718	6.95198e-05	0.000741402
sp|Q03252|LMNB2_HUMAN	LMNB2	0.119098	4.12515	7.00565e-05	0.000746471
sp|Q96HH9|GRM2B_HUMAN	GRAMD2B	0.251405	4.12442	7.02506e-05	0.000747228
sp|Q96IW2|SHD_HUMAN	SHD	-0.360009	-4.12449	7.02314e-05	0.000747228
sp|P12107|COBA1_HUMAN	COL11A1	0.646987	4.12376	7.04257e-05	0.000748435
sp|O00422|SAP18_HUMAN	SAP18	0.121285	4.12122	7.11058e-05	0.000755001
sp|O60216|RAD21_HUMAN	RAD21	0.152267	4.11981	7.14859e-05	0.000758031
sp|P02545|LMNA_HUMAN	LMNA	0.255157	4.1197	7.15159e-05	0.000758031
sp|Q8NB49|AT11C_HUMAN	ATP11C	0.151007	4.11927	7.16323e-05	0.000758603
sp|P09619|PGFRB_HUMAN	PDGFRB	0.155437	4.11808	7.19568e-05	0.000761376
sp|O75083|WDR1_HUMAN	WDR1	0.143511	4.11727	7.21778e-05	0.000762437
tr|A0A2R8YDM2|A0A2R8YDM2_HUMAN	OPA1	-0.114262	-4.11725	7.21826e-05	0.000762437
sp|Q05209|PTN12_HUMAN	PTPN12	0.136117	4.11607	7.25049e-05	0.000765176
sp|Q93091|RNAS6_HUMAN	RNASE6	0.309263	4.11505	7.27845e-05	0.000766793
sp|Q9Y3I0|RTCB_HUMAN	RTCB	0.0821474	4.11525	7.27316e-05	0.000766793
sp|Q12959-2|DLG1-2_HUMAN	DLG1	-0.0852454	-4.11341	7.32383e-05	0.000770238
tr|H0YA05|H0YA05_HUMAN	PALLD	0.348897	4.11361	7.3183e-05	0.000770238
sp|Q96T23|RSF1_HUMAN	RSF1	0.0958012	4.11285	7.33942e-05	0.000771211
sp|Q9H7M9|VISTA_HUMAN	VSIR	0.229525	4.11239	7.3521e-05	0.000771875
sp|P55072|TERA_HUMAN	VCP	0.0477897	4.1113	7.38255e-05	0.000774403
sp|Q13951|PEBB_HUMAN	CBFB	0.199475	4.1103	7.4104e-05	0.000775984
tr|A0A0U1RQQ1|A0A0U1RQQ1_HUMAN	CARMIL1	0.094041	4.1104	7.4076e-05	0.000775984
sp|Q8NFT6|DBF4B_HUMAN	DBF4B	0.267223	4.10962	7.42928e-05	0.000777291
sp|Q6PJT7-11|ZC3HE-11_HUMAN	ZC3H14	0.119996	4.10918	7.44171e-05	0.000777922
sp|Q5SQH8-2|CF136-2_HUMAN	C6orf136	-0.131652	-4.10852	7.46041e-05	0.000779206
sp|P10515|ODP2_HUMAN	DLAT	-0.138276	-4.10767	7.48427e-05	0.000781026
sp|Q12882|DPYD_HUMAN	DPYD	0.208659	4.10696	7.50446e-05	0.00078246
sp|P19086|GNAZ_HUMAN	GNAZ	-0.112107	-4.105	7.56004e-05	0.000786231
sp|P52735-2|VAV2-2_HUMAN	VAV2	0.142517	4.10534	7.55054e-05	0.000786231
tr|F8W8U2|F8W8U2_HUMAN	MADD	-0.144549	-4.10501	7.55987e-05	0.000786231
tr|Q4VXP6|Q4VXP6_HUMAN	KCNQ2	-0.127919	-4.1038	7.59451e-05	0.00078914
sp|O15117|FYB1_HUMAN	FYB1	0.314424	4.10287	7.62101e-05	0.000790541
sp|P21912|SDHB_HUMAN	SDHB	-0.119478	-4.10293	7.61947e-05	0.000790541
sp|Q8N1S5|S39AB_HUMAN	SLC39A11	0.24206	4.10181	7.65153e-05	0.000793017
sp|Q9BW62|KATL1_HUMAN	KATNAL1	-0.101119	-4.10159	7.65793e-05	0.000793017
sp|P09382|LEG1_HUMAN	LGALS1	0.220447	4.09761	7.77386e-05	0.000804336
sp|O43526|KCNQ2_HUMAN	KCNQ2	-0.122442	-4.09634	7.81114e-05	0.000806819
sp|Q8N350-4|CBARP-4_HUMAN	CBARP	-0.188534	-4.09642	7.80865e-05	0.000806819
sp|P50416|CPT1A_HUMAN	CPT1A	0.125274	4.09589	7.8244e-05	0.000807502
sp|Q00610|CLH1_HUMAN	CLTC	-0.125582	-4.09481	7.85619e-05	0.000810095
sp|Q8WX93|PALLD_HUMAN	PALLD	0.339085	4.094	7.88034e-05	0.000811895
tr|E7EVA0|E7EVA0_HUMAN	MAP4	0.198885	4.09268	7.91956e-05	0.000815245
sp|Q9H3G5|CPVL_HUMAN	CPVL	0.337182	4.09214	7.93575e-05	0.00081622
sp|Q9C0D0|PHAR1_HUMAN	PHACTR1	-0.169117	-4.09143	7.95703e-05	0.000817025
sp|Q9H477|RBSK_HUMAN	RBKS	0.204188	4.09151	7.95461e-05	0.000817025
sp|P55786|PSA_HUMAN	NPEPPS	0.0784855	4.09087	7.97381e-05	0.000818056
sp|Q14739|LBR_HUMAN	LBR	0.173776	4.09054	7.98357e-05	0.000818367
sp|P16220|CREB1_HUMAN	CREB1	0.199093	4.09008	7.99744e-05	0.000819097
sp|Q12959-8|DLG1-8_HUMAN	DLG1	-0.089535	-4.08832	8.0505e-05	0.000823143
tr|K4DIE0|K4DIE0_HUMAN	NUMA1	0.200544	4.08833	8.05022e-05	0.000823143
sp|P04844|RPN2_HUMAN	RPN2	0.104986	4.08784	8.06526e-05	0.000823266
tr|H0YAB0|H0YAB0_HUMAN	LMNA	0.271146	4.08798	8.06101e-05	0.000823266
sp|Q15283|RASA2_HUMAN	RASA2	-0.143581	-4.08503	8.15091e-05	0.000831311
tr|K7EJJ5|K7EJJ5_HUMAN	CLTC	-0.140344	-4.08441	8.16978e-05	0.000832537
tr|E7EWQ4|E7EWQ4_HUMAN	DGKI	-0.131467	-4.08333	8.20309e-05	0.00083523
sp|O15211|RGL2_HUMAN	RGL2	0.138379	4.08201	8.24404e-05	0.00083787
sp|P36871|PGM1_HUMAN	PGM1	0.147241	4.08161	8.25644e-05	0.00083787
sp|Q9HCD6-2|TANC2-2_HUMAN	TANC2	-0.10254	-4.0816	8.25661e-05	0.00083787
tr|A0A087WXX8|A0A087WXX8_HUMAN	SDHB	-0.121147	-4.08212	8.24042e-05	0.00083787
sp|P12270|TPR_HUMAN	TPR	0.0919998	4.08106	8.27336e-05	0.000838169
sp|Q14693-7|LPIN1-7_HUMAN	LPIN1	0.11766	4.0811	8.2721e-05	0.000838169
sp|Q92796|DLG3_HUMAN	DLG3	-0.110936	-4.08056	8.28901e-05	0.000839055
tr|E9PJK0|E9PJK0_HUMAN	BSCL2	-0.175466	-4.08029	8.2974e-05	0.000839205
sp|Q5SQH8|CF136_HUMAN	C6orf136	-0.132791	-4.07893	8.34006e-05	0.000842817
sp|Q16537|2A5E_HUMAN	PPP2R5E	-0.103542	-4.07865	8.34887e-05	0.000843007
sp|O00625|PIR_HUMAN	PIR	0.319879	4.07728	8.39185e-05	0.00084594
sp|P24386|RAE1_HUMAN	CHM	-0.102277	-4.07732	8.39066e-05	0.00084594
sp|Q5Y7A7|2B1D_HUMAN	HLA-DRB1	0.525202	4.07589	8.43584e-05	0.000849669
sp|Q9H0W9|CK054_HUMAN	C11orf54	0.235382	4.07434	8.48496e-05	0.000853909
sp|A6NIH7|U119B_HUMAN	UNC119B	0.123361	4.07341	8.51458e-05	0.000856181
sp|P55058|PLTP_HUMAN	PLTP	0.190432	4.07276	8.53556e-05	0.000857352
sp|Q9Y5S9|RBM8A_HUMAN	RBM8A	0.112738	4.07261	8.54035e-05	0.000857352
sp|O15018|PDZD2_HUMAN	PDZD2	-0.11754	-4.07193	8.562e-05	0.000857781
sp|Q30167|2B1A_HUMAN	HLA-DRB1	0.428684	4.07205	8.55831e-05	0.000857781
tr|E9PN54|E9PN54_HUMAN	EPB41L2	0.217007	4.07182	8.56581e-05	0.000857781
sp|O95834|EMAL2_HUMAN	EML2	0.189538	4.071	8.59203e-05	0.000859699
sp|Q01469|FABP5_HUMAN	FABP5	0.390917	4.06969	8.6344e-05	0.000863226
sp|Q8TEM1|PO210_HUMAN	NUP210	0.112829	4.06883	8.66221e-05	0.000865295
sp|P07947|YES_HUMAN	YES1	0.100252	4.06833	8.6787e-05	0.00086623
sp|Q8TAQ2|SMRC2_HUMAN	SMARCC2	0.0806931	4.06806	8.68743e-05	0.00086639
sp|P82970|HMGN5_HUMAN	HMGN5	0.199653	4.06641	8.74143e-05	0.000871059
sp|P23497|SP100_HUMAN	SP100	0.212126	4.06454	8.80288e-05	0.000875893
sp|Q9H3K6|BOLA2_HUMAN	BOLA2	0.134968	4.06449	8.80436e-05	0.000875893
sp|A1A5C7|S22AN_HUMAN	SLC22A23	-0.172149	-4.06233	8.87616e-05	0.000882313
tr|C9J8Y3|C9J8Y3_HUMAN	ICA1	-0.166802	-4.06036	8.94198e-05	0.000888129
sp|P35241|RADI_HUMAN	RDX	0.252802	4.05779	9.02819e-05	0.000895959
sp|P23219|PGH1_HUMAN	PTGS1	0.289152	4.05703	9.05422e-05	0.000897809
sp|Q96FE5|LIGO1_HUMAN	LINGO1	-0.173827	-4.05557	9.10364e-05	0.000901973
sp|P29692-2|EF1D-2_HUMAN	EEF1D	0.0716433	4.05241	9.21201e-05	0.000911966
sp|Q96A33|CCD47_HUMAN	CCDC47	0.0821501	4.05169	9.23694e-05	0.00091369
sp|P07910|HNRPC_HUMAN	HNRNPC	0.109075	4.05104	9.25951e-05	0.000914433
sp|Q96EE3-1|SEH1-1_HUMAN	SEH1L	0.104433	4.05112	9.25658e-05	0.000914433
sp|Q7Z5R6|AB1IP_HUMAN	APBB1IP	0.199988	4.05037	9.28273e-05	0.000915981
sp|Q8WXE9|STON2_HUMAN	STON2	0.278047	4.04986	9.30045e-05	0.000916985
sp|Q6ZMZ3|SYNE3_HUMAN	SYNE3	0.145917	4.04924	9.32195e-05	0.000918094
sp|Q96HE7|ERO1A_HUMAN	ERO1A	-0.108036	-4.04889	9.33427e-05	0.000918094
tr|A0A0A6YYN8|A0A0A6YYN8_HUMAN	SLC25A22	-0.213902	-4.04883	9.33636e-05	0.000918094
tr|Q5JUW8|Q5JUW8_HUMAN	DLG3	-0.111725	-4.04867	9.34193e-05	0.000918094
sp|Q16864|VATF_HUMAN	ATP6V1F	-0.11888	-4.0482	9.35829e-05	0.000918958
tr|H0Y314|H0Y314_HUMAN	MACF1	0.0744978	4.04723	9.39212e-05	0.000921536
sp|P49757|NUMB_HUMAN	NUMB	-0.100055	-4.04651	9.41747e-05	0.000921863
sp|Q5KU26|COL12_HUMAN	COLEC12	0.325623	4.04632	9.42427e-05	0.000921863
sp|Q9P1Y5-2|CAMP3-2_HUMAN	CAMSAP3	-0.106847	-4.04628	9.42581e-05	0.000921863
tr|R4GMN5|R4GMN5_HUMAN	ANKS1B	-0.17401	-4.04682	9.40673e-05	0.000921863
tr|B7ZC39|B7ZC39_HUMAN	SH3GLB2	-0.144212	-4.04585	9.44069e-05	0.000922575
sp|Q5T8D3-2|ACBD5-2_HUMAN	ACBD5	0.118217	4.04452	9.48778e-05	0.000926431
sp|Q9UNA1|RHG26_HUMAN	ARHGAP26	-0.185354	-4.04371	9.51673e-05	0.000928512
sp|O95140-2|MFN2-2_HUMAN	MFN2	-0.0881172	-4.04199	9.578e-05	0.000933739
sp|Q8N8A2|ANR44_HUMAN	ANKRD44	0.0902664	4.04085	9.6187e-05	0.000936956
sp|Q8NDV3|SMC1B_HUMAN	SMC1B	0.287387	4.03735	9.74536e-05	0.000948532
sp|Q9BU02|THTPA_HUMAN	THTPA	0.144961	4.03688	9.76256e-05	0.000948686
sp|Q9NYL2|M3K20_HUMAN	MAP3K20	0.259119	4.03703	9.75711e-05	0.000948686
sp|P30519|HMOX2_HUMAN	HMOX2	-0.0820014	-4.03458	9.84657e-05	0.000956085
sp|P09496-2|CLCA-2_HUMAN	CLTA	-0.183259	-4.03417	9.86168e-05	0.000956787
sp|Q63ZY3|KANK2_HUMAN	KANK2	0.284246	4.0338	9.87517e-05	0.000957332
sp|P61019|RAB2A_HUMAN	RAB2A	-0.0825805	-4.03276	9.91363e-05	0.000960294
sp|Q96T17-5|MA7D2-5_HUMAN	MAP7D2	-0.159386	-4.03068	9.99081e-05	0.000966999
sp|Q9H0C8|ILKAP_HUMAN	ILKAP	0.114226	4.03032	0.000100043	0.000967533
sp|Q7Z6G8-2|ANS1B-2_HUMAN	ANKS1B	-0.210801	-4.02958	0.00010032	0.000969445
sp|P48681|NEST_HUMAN	NES	0.342764	4.02936	0.000100403	0.000969476
sp|Q9NY65|TBA8_HUMAN	TUBA8	-0.0826827	-4.02838	0.000100769	0.00097223
sp|Q93045|STMN2_HUMAN	STMN2	-0.119982	-4.02804	0.000100897	0.000972691
sp|O60359|CCG3_HUMAN	CACNG3	-0.201969	-4.02737	0.000101148	0.000973172
sp|Q6ZMW3|EMAL6_HUMAN	EML6	-0.124985	-4.02761	0.000101059	0.000973172
tr|H7C0I9|H7C0I9_HUMAN	KALRN	-0.116276	-4.02727	0.000101187	0.000973172
sp|Q5JR12|PPM1J_HUMAN	PPM1J	-0.129758	-4.02702	0.00010128	0.000973298
sp|Q96PU5|NED4L_HUMAN	NEDD4L	-0.13373	-4.02515	0.000101989	0.000978565
sp|Q9UPX0|TUTLB_HUMAN	IGSF9B	-0.226678	-4.02516	0.000101984	0.000978565
tr|H7C2W5|H7C2W5_HUMAN	NDUFA10	-0.165926	-4.02354	0.000102604	0.000983689
sp|Q5T9L3|WLS_HUMAN	WLS	0.188638	4.02311	0.000102769	0.000984256
tr|A0A0A0MTJ2|A0A0A0MTJ2_HUMAN	SPOCK3	0.234663	4.02296	0.000102825	0.000984256
sp|Q13642-1|FHL1-1_HUMAN	FHL1	0.214578	4.02232	0.000103068	0.000985805
sp|P09496|CLCA_HUMAN	CLTA	-0.190772	-4.02139	0.000103426	0.000988449
sp|Q9HCH3|CPNE5_HUMAN	CPNE5	-0.182516	-4.01963	0.000104107	0.000994175
sp|Q5TCY1|TTBK1_HUMAN	TTBK1	-0.0998868	-4.01868	0.000104478	0.000996931
sp|Q7Z6J0|SH3R1_HUMAN	SH3RF1	-0.122355	-4.01792	0.000104771	0.000997375
sp|Q9UJF2-2|NGAP-2_HUMAN	RASAL2	-0.1155	-4.01812	0.000104695	0.000997375
sp|Q9UL54-2|TAOK2-2_HUMAN	TAOK2	-0.0814298	-4.01828	0.000104634	0.000997375
sp|P68366|TBA4A_HUMAN	TUBA4A	-0.0998227	-4.01622	0.000105436	0.00100292
sp|P55010|IF5_HUMAN	EIF5	0.0770739	4.01586	0.000105577	0.00100348
sp|Q5T6X4|F162B_HUMAN	FAM162B	-0.380051	-4.01531	0.000105796	0.00100477
sp|Q96DZ5|CLIP3_HUMAN	CLIP3	-0.102122	-4.0146	0.000106073	0.00100604
sp|Q9HBI0|PARVG_HUMAN	PARVG	0.255741	4.01455	0.000106095	0.00100604
sp|O14514|AGRB1_HUMAN	ADGRB1	-0.147714	-4.01386	0.000106365	0.00100703
sp|Q8WXD9|CSKI1_HUMAN	CASKIN1	-0.126082	-4.01401	0.000106306	0.00100703
sp|O75891|AL1L1_HUMAN	ALDH1L1	0.227223	4.01337	0.000106562	0.00100732
tr|A0A087WWU8|A0A087WWU8_HUMAN	TPM3	0.121974	4.01355	0.000106491	0.00100732
sp|O00159|MYO1C_HUMAN	MYO1C	0.193298	4.0126	0.000106865	0.00100862
sp|Q9P1Y5|CAMP3_HUMAN	CAMSAP3	-0.105769	-4.01276	0.000106801	0.00100862
sp|Q9BRK0-2|REEP2-2_HUMAN	REEP2	-0.137824	-4.01151	0.000107299	0.0010115
tr|A0A1B0GW14|A0A1B0GW14_HUMAN	KCNQ2	-0.115684	-4.01142	0.000107337	0.0010115
tr|A0A067XG54|A0A067XG54_HUMAN	ATP11C	0.147145	4.01072	0.000107614	0.00101333
sp|Q2TB90|HKDC1_HUMAN	HKDC1	-0.172613	-4.00832	0.000108578	0.00102003
sp|Q9Y3C8|UFC1_HUMAN	UFC1	0.124764	4.00843	0.000108536	0.00102003
sp|Q9Y6R0|NUMBL_HUMAN	NUMBL	-0.170711	-4.0086	0.000108467	0.00102003
sp|O95299|NDUAA_HUMAN	NDUFA10	-0.152005	-4.00743	0.000108941	0.00102144
sp|Q16629|SRSF7_HUMAN	SRSF7	0.10152	4.00749	0.000108916	0.00102144
sp|Q96AC1|FERM2_HUMAN	FERMT2	0.165523	4.00733	0.000108981	0.00102144
tr|K7ERN1|K7ERN1_HUMAN	NEDD4L	-0.120249	-4.00557	0.000109693	0.00102733
tr|H0YI72|H0YI72_HUMAN	ANKS1B	-0.190698	-4.00463	0.000110076	0.00103012
tr|A0A1B0GUL6|A0A1B0GUL6_HUMAN	BTBD8	-0.192619	-4.00411	0.00011029	0.00103133
sp|P14317-2|HCLS1-2_HUMAN	HCLS1	0.277426	4.00382	0.000110407	0.00103163
tr|A0A2R8YER1|A0A2R8YER1_HUMAN	CHD4	0.0773529	4.00332	0.000110615	0.00103278
sp|O43759|SNG1_HUMAN	SYNGR1	-0.259799	-4.0019	0.0001112	0.00103742
sp|P51970|NDUA8_HUMAN	NDUFA8	-0.197237	-4.0017	0.000111283	0.00103742
sp|Q96K76-4|UBP47-4_HUMAN	USP47	0.0704342	4.00034	0.000111845	0.0010414
sp|Q9BUR5|MIC26_HUMAN	APOO	-0.162804	-4.00025	0.000111881	0.0010414
sp|Q5T764|IFT1B_HUMAN	IFIT1B	0.298481	3.99805	0.000112798	0.00104874
sp|Q8N668|COMD1_HUMAN	COMMD1	0.109772	3.99794	0.000112843	0.00104874
sp|Q9Y490|TLN1_HUMAN	TLN1	0.191917	3.99761	0.000112983	0.00104924
sp|Q08499|PDE4D_HUMAN	PDE4D	-0.137894	-3.99701	0.000113235	0.00105077
sp|P54105|ICLN_HUMAN	CLNS1A	0.130314	3.99623	0.00011356	0.00105219
sp|Q7Z6L1|TCPR1_HUMAN	TECPR1	-0.116702	-3.99634	0.000113514	0.00105219
sp|Q5VU57|CBPC6_HUMAN	AGBL4	-0.17412	-3.9957	0.000113787	0.00105348
sp|Q8NHP1|ARK74_HUMAN	AKR7L	0.205664	3.99517	0.00011401	0.00105474
sp|Q99497|PARK7_HUMAN	PARK7	0.0948818	3.99475	0.000114186	0.00105557
sp|Q8N350|CBARP_HUMAN	CBARP	-0.14778	-3.9945	0.000114295	0.00105577
sp|Q96K76|UBP47_HUMAN	USP47	0.0716321	3.99407	0.000114473	0.00105661
sp|Q99543|DNJC2_HUMAN	DNAJC2	0.100242	3.99319	0.000114849	0.00105928
sp|O00479|HMGN4_HUMAN	HMGN4	0.27078	3.9922	0.000115273	0.00106018
sp|P11310|ACADM_HUMAN	ACADM	0.193586	3.99246	0.000115159	0.00106018
sp|P12318|FCG2A_HUMAN	FCGR2A	0.288948	3.99214	0.000115296	0.00106018
sp|Q8NC44|RETR2_HUMAN	RETREG2	-0.118397	-3.99227	0.000115243	0.00106018
sp|P51805|PLXA3_HUMAN	PLXNA3	-0.126933	-3.99101	0.00011578	0.00106222
sp|Q8TEW0|PARD3_HUMAN	PARD3	0.180697	3.99116	0.000115717	0.00106222
tr|H0Y905|H0Y905_HUMAN	RAPGEF2	-0.133664	-3.99107	0.000115755	0.00106222
sp|P49754|VPS41_HUMAN	VPS41	0.0718136	3.98977	0.000116315	0.00106552
sp|Q92572|AP3S1_HUMAN	AP3S1	-0.144339	-3.98988	0.000116267	0.00106552
sp|Q9NQ66-2|PLCB1-2_HUMAN	PLCB1	-0.180373	-3.98951	0.000116424	0.00106571
sp|P30273|FCERG_HUMAN	FCER1G	0.380813	3.98911	0.0001166	0.0010663
sp|P98170|XIAP_HUMAN	XIAP	0.0933765	3.98896	0.000116664	0.0010663
tr|H0Y304|H0Y304_HUMAN	DMD	0.103163	3.98746	0.000117314	0.00107144
sp|P34896|GLYC_HUMAN	SHMT1	0.266937	3.98637	0.000117789	0.00107497
sp|Q7Z5Q1-8|CPEB2-8_HUMAN	CPEB2	-0.0845662	-3.9844	0.000118651	0.00108202
sp|O94925-3|GLSK-3_HUMAN	GLS	-0.133405	-3.98208	0.00011967	0.00109
tr|E5RI56|E5RI56_HUMAN	NA	-0.145585	-3.982	0.000119705	0.00109
tr|J3QS83|J3QS83_HUMAN	EPB41L3	-0.157961	-3.97918	0.000120964	0.00110063
sp|O95394|AGM1_HUMAN	PGM3	0.191406	3.97827	0.000121371	0.00110325
tr|J3KRP9|J3KRP9_HUMAN	TANC2	-0.0971719	-3.97813	0.000121433	0.00110325
tr|E9PRP6|E9PRP6_HUMAN	PAK1	-0.328888	-3.97758	0.000121679	0.00110466
sp|Q7Z2W4|ZCCHV_HUMAN	ZC3HAV1	0.189204	3.97681	0.000122026	0.00110698
sp|Q01081|U2AF1_HUMAN	U2AF1	0.122107	3.97615	0.000122322	0.0011085
sp|Q13137|CACO2_HUMAN	CALCOCO2	0.178239	3.97583	0.000122467	0.0011085
sp|Q8IX12|CCAR1_HUMAN	CCAR1	0.106733	3.97594	0.000122421	0.0011085
sp|Q9Y383|LC7L2_HUMAN	LUC7L2	0.115611	3.97513	0.000122785	0.00111055
sp|Q07955|SRSF1_HUMAN	SRSF1	0.0927574	3.97372	0.000123425	0.00111551
sp|Q5EBL8|PDZ11_HUMAN	PDZD11	0.174023	3.97302	0.000123748	0.0011176
sp|O75116|ROCK2_HUMAN	ROCK2	-0.090503	-3.97202	0.000124204	0.00112088
tr|A0A2R8Y445|A0A2R8Y445_HUMAN	NA	0.0770779	3.97114	0.000124609	0.0011237
sp|P62937-2|PPIA-2_HUMAN	PPIA	0.0730536	3.97059	0.000124863	0.00112516
sp|Q9UPP5-2|K1107-2_HUMAN	KIAA1107	-0.198524	-3.97028	0.000125004	0.00112559
sp|P12814-2|ACTN1-2_HUMAN	ACTN1	-0.161612	-3.96941	0.000125405	0.00112837
sp|Q92692|NECT2_HUMAN	NECTIN2	0.174188	3.96889	0.000125646	0.00112943
sp|Q9NS86|LANC2_HUMAN	LANCL2	-0.101246	-3.96876	0.000125709	0.00112943
sp|P12814|ACTN1_HUMAN	ACTN1	-0.161572	-3.96774	0.000126181	0.00113283
tr|H0YCQ5|H0YCQ5_HUMAN	NPEPPS	0.0903745	3.96745	0.000126317	0.00113321
tr|Q5BKV1|Q5BKV1_HUMAN	MYH9	0.12371	3.96712	0.000126473	0.00113378
sp|Q9NQZ5|STAR7_HUMAN	STARD7	0.137255	3.96672	0.00012666	0.00113461
sp|O60832|DKC1_HUMAN	DKC1	0.103902	3.96424	0.000127821	0.00114417
sp|O75386|TULP3_HUMAN	TULP3	0.257489	3.9631	0.000128361	0.0011467
sp|Q9BQI5-4|SGIP1-4_HUMAN	SGIP1	-0.131107	-3.9632	0.000128314	0.0011467
sp|Q9Y6W3|CAN7_HUMAN	CAPN7	0.112224	3.96305	0.000128387	0.0011467
sp|Q9NQ66|PLCB1_HUMAN	PLCB1	-0.182736	-3.96283	0.000128489	0.00114677
sp|Q14194-2|DPYL1-2_HUMAN	CRMP1	-0.0834005	-3.96233	0.000128727	0.00114806
sp|O60313|OPA1_HUMAN	OPA1	-0.111293	-3.9619	0.000128929	0.00114901
sp|P19971|TYPH_HUMAN	TYMP	0.372339	3.96031	0.000129688	0.00115408
tr|A0A0G2JLD0|A0A0G2JLD0_HUMAN	AGK	-0.160552	-3.96048	0.000129608	0.00115408
sp|Q9Y4K4|M4K5_HUMAN	MAP4K5	0.121243	3.96006	0.000129807	0.00115429
sp|Q5FWE3|PRRT3_HUMAN	PRRT3	-0.127737	-3.95893	0.000130349	0.00115826
sp|P12814-3|ACTN1-3_HUMAN	ACTN1	-0.162054	-3.95842	0.000130593	0.00115874
tr|D6REP5|D6REP5_HUMAN	GRAMD2B	0.251982	3.95859	0.000130514	0.00115874
sp|O95786|DDX58_HUMAN	DDX58	0.215272	3.95805	0.00013077	0.00115947
tr|E5RFC6|E5RFC6_HUMAN	SNAP91	-0.12635	-3.95783	0.000130876	0.00115956
sp|Q92835|SHIP1_HUMAN	INPP5D	0.176353	3.95739	0.00013109	0.0011605
tr|A0A087WW53|A0A087WW53_HUMAN	CORO1B	0.154748	3.95722	0.000131174	0.0011605
sp|C9JRZ8|AK1BF_HUMAN	AKR1B15	0.147333	3.95528	0.000132114	0.00116782
sp|Q13137-3|CACO2-3_HUMAN	CALCOCO2	0.17429	3.95512	0.000132194	0.00116782
sp|O14933|UB2L6_HUMAN	UBE2L6	0.195248	3.95419	0.000132643	0.00117094
sp|Q6R327|RICTR_HUMAN	RICTOR	0.0834373	3.95357	0.000132949	0.00117225
sp|Q9BZR6|RTN4R_HUMAN	RTN4R	-0.150946	-3.9535	0.000132984	0.00117225
sp|Q7Z2W4-3|ZCCHV-3_HUMAN	ZC3HAV1	0.1883	3.95021	0.000134601	0.00118564
sp|Q5T8D3|ACBD5_HUMAN	ACBD5	0.111117	3.94845	0.000135476	0.00119162
sp|Q9H4A4|AMPB_HUMAN	RNPEP	0.175336	3.94852	0.000135441	0.00119162
sp|P52209|6PGD_HUMAN	PGD	0.157261	3.94767	0.000135868	0.0011942
sp|O95897|NOE2_HUMAN	OLFM2	-0.229546	-3.94665	0.000136374	0.00119692
sp|Q9UPY8-2|MARE3-2_HUMAN	MAPRE3	-0.102027	-3.94676	0.000136323	0.00119692
sp|Q13546|RIPK1_HUMAN	RIPK1	0.16082	3.94611	0.000136647	0.00119789
tr|F8VYL3|F8VYL3_HUMAN	DNM1L	-0.189747	-3.94604	0.000136682	0.00119789
sp|O43592|XPOT_HUMAN	XPOT	0.120318	3.94507	0.000137172	0.00119959
sp|Q8TEW0-10|PARD3-10_HUMAN	PARD3	0.194869	3.94543	0.00013699	0.00119959
sp|Q9NQR7|CC177_HUMAN	CCDC177	-0.184316	-3.94514	0.000137134	0.00119959
sp|P52735|VAV2_HUMAN	VAV2	0.137598	3.94431	0.000137554	0.00119981
sp|P55809|SCOT1_HUMAN	OXCT1	-0.132988	-3.94456	0.000137427	0.00119981
sp|Q9BWF3|RBM4_HUMAN	RBM4	0.100502	3.94435	0.000137535	0.00119981
tr|A0A1B0GU37|A0A1B0GU37_HUMAN	PRRT2	-0.232489	-3.94423	0.000137592	0.00119981
sp|P40222|TXLNA_HUMAN	TXLNA	0.0764446	3.94283	0.000138302	0.00120514
sp|P61769|B2MG_HUMAN	B2M	0.340048	3.94152	0.000138974	0.00121012
sp|Q9UPY5|XCT_HUMAN	SLC7A11	0.238165	3.94108	0.000139199	0.00121121
sp|Q16644|MAPK3_HUMAN	MAPKAPK3	0.204871	3.94052	0.000139484	0.00121282
tr|B0QY60|B0QY60_HUMAN	SUN2	0.29209	3.93976	0.000139875	0.00121535
sp|P52569|CTR2_HUMAN	SLC7A2	0.305482	3.93952	0.000139994	0.00121552
sp|Q8ND30-3|LIPB2-3_HUMAN	PPFIBP2	0.155247	3.93885	0.000140341	0.00121766
sp|Q8TF61|FBX41_HUMAN	FBXO41	-0.131877	-3.93836	0.000140594	0.0012184
tr|C9K0J5|C9K0J5_HUMAN	RAPH1	-0.121714	-3.9383	0.000140627	0.0012184
sp|Q16134|ETFD_HUMAN	ETFDH	0.125552	3.93766	0.000140955	0.00122037
sp|Q99714|HCD2_HUMAN	HSD17B10	0.126331	3.93561	0.000142019	0.00122871
sp|Q9UPP5|K1107_HUMAN	KIAA1107	-0.196087	-3.93488	0.000142402	0.00123115
sp|Q13423|NNTM_HUMAN	NNT	-0.109392	-3.9346	0.000142548	0.00123153
tr|H0YJ34|H0YJ34_HUMAN	FERMT2	0.16562	3.9342	0.000142757	0.00123246
tr|J3QKK9|J3QKK9_HUMAN	ALDH3A2	0.181889	3.93395	0.00014289	0.00123273
sp|Q6ZVL6|K154L_HUMAN	KIAA1549L	-0.191765	-3.93367	0.000143037	0.00123312
sp|Q13972-3|RGRF1-3_HUMAN	RASGRF1	-0.127757	-3.93219	0.000143816	0.00123808
sp|Q13972|RGRF1_HUMAN	RASGRF1	-0.127757	-3.93219	0.000143816	0.00123808
sp|Q6PD62|CTR9_HUMAN	CTR9	0.0913494	3.93016	0.000144889	0.00124556
sp|Q9BXP5|SRRT_HUMAN	SRRT	0.104363	3.93035	0.00014479	0.00124556
tr|A0A087X2I1|A0A087X2I1_HUMAN	PSMC6	0.0550545	3.92889	0.000145566	0.00125048
sp|Q9H2P0|ADNP_HUMAN	ADNP	0.0900081	3.92774	0.00014618	0.00125488
sp|Q9NU63|ZFP57_HUMAN	ZFP57	-0.218951	-3.92722	0.000146458	0.00125638
sp|Q9NQ29|LUC7L_HUMAN	LUC7L	0.118398	3.92678	0.000146693	0.00125751
sp|Q5JTV8-2|TOIP1-2_HUMAN	TOR1AIP1	0.119897	3.92508	0.000147613	0.0012645
sp|O60241-2|AGRB2-2_HUMAN	ADGRB2	-0.123284	-3.92477	0.00014778	0.00126504
sp|Q14974|IMB1_HUMAN	KPNB1	0.0726219	3.92426	0.000148055	0.00126649
sp|Q9NR46|SHLB2_HUMAN	SH3GLB2	-0.133343	-3.92388	0.000148264	0.00126739
sp|Q8WXS5|CCG8_HUMAN	CACNG8	-0.231345	-3.92363	0.000148399	0.00126766
sp|Q14164|IKKE_HUMAN	IKBKE	-0.148581	-3.92169	0.000149455	0.00127488
sp|Q9GZY8|MFF_HUMAN	MFF	-0.0803406	-3.92173	0.000149432	0.00127488
sp|Q8TF44|C2C4C_HUMAN	C2CD4C	-0.215738	-3.91863	0.000151138	0.00128833
tr|A0JP02|A0JP02_HUMAN	PLEKHA5	0.109853	3.91661	0.000152261	0.00129699
sp|A2RUC4|TYW5_HUMAN	TYW5	0.124889	3.91516	0.000153072	0.00130299
sp|O14880|MGST3_HUMAN	MGST3	-0.113987	-3.91481	0.000153265	0.00130372
sp|P07902|GALT_HUMAN	GALT	0.182697	3.91457	0.0001534	0.00130396
sp|P12236|ADT3_HUMAN	SLC25A6	-0.128493	-3.91356	0.000153969	0.00130605
sp|P27797|CALR_HUMAN	CALR	0.0952599	3.91382	0.000153822	0.00130605
sp|P78333|GPC5_HUMAN	GPC5	0.163821	3.91358	0.000153957	0.00130605
sp|Q96BW5|PTER_HUMAN	PTER	0.422223	3.91237	0.000154642	0.00131084
sp|Q5T5Y3|CAMP1_HUMAN	CAMSAP1	-0.071722	-3.91075	0.000155561	0.00131771
sp|Q5VWJ9|SNX30_HUMAN	SNX30	-0.0885776	-3.91019	0.000155876	0.00131946
sp|O75533|SF3B1_HUMAN	SF3B1	0.0886853	3.90875	0.000156702	0.00132093
sp|P05026|AT1B1_HUMAN	ATP1B1	-0.131698	-3.90884	0.000156649	0.00132093
sp|Q00535|CDK5_HUMAN	CDK5	-0.104667	-3.90889	0.000156618	0.00132093
sp|Q13642-4|FHL1-4_HUMAN	FHL1	0.208156	3.9089	0.000156615	0.00132093
sp|Q13642-5|FHL1-5_HUMAN	FHL1	0.208156	3.9089	0.000156615	0.00132093
sp|Q9BQE3|TBA1C_HUMAN	TUBA1C	-0.0899165	-3.90893	0.000156597	0.00132093
sp|Q5JTD7|LRC73_HUMAN	LRRC73	-0.25365	-3.90747	0.000157434	0.00132618
sp|Q14982-3|OPCM-3_HUMAN	OPCML	-0.157386	-3.90509	0.00015881	0.00133592
sp|Q9H6K5|PRR36_HUMAN	PRR36	-0.151899	-3.90514	0.00015878	0.00133592
sp|O75970|MPDZ_HUMAN	MPDZ	0.0940165	3.90466	0.000159058	0.00133616
sp|P35658-3|NU214-3_HUMAN	NUP214	0.089936	3.90465	0.000159065	0.00133616
sp|Q70E73|RAPH1_HUMAN	RAPH1	-0.127517	-3.90428	0.000159279	0.00133616
tr|F8W6G1|F8W6G1_HUMAN	NRBP1	-0.115042	-3.90436	0.000159232	0.00133616
sp|P60900-3|PSA6-3_HUMAN	PSMA6	0.0883402	3.90285	0.000160112	0.00134222
sp|Q8N7H5|PAF1_HUMAN	PAF1	0.105488	3.90156	0.00016087	0.00134765
sp|Q14982|OPCM_HUMAN	OPCML	-0.164491	-3.90136	0.000160988	0.0013477
sp|Q14315|FLNC_HUMAN	FLNC	0.452884	3.90083	0.000161298	0.00134845
sp|Q76N89|HECW1_HUMAN	HECW1	-0.13435	-3.90086	0.000161281	0.00134845
sp|P06400|RB_HUMAN	RB1	0.169502	3.89916	0.000162284	0.00135488
sp|Q8NCN5|PDPR_HUMAN	PDPR	0.148775	3.89915	0.000162292	0.00135488
sp|Q16543|CDC37_HUMAN	CDC37	-0.0895274	-3.89827	0.000162811	0.00135643
sp|Q6VEQ5|WASH2_HUMAN	WASH2P	0.118499	3.89856	0.00016264	0.00135643
tr|A0A2R8Y5X0|A0A2R8Y5X0_HUMAN	SGCE	0.166228	3.89842	0.000162722	0.00135643
sp|Q96SU4|OSBL9_HUMAN	OSBPL9	0.0969606	3.8957	0.000164342	0.00136824
sp|Q9UBI6|GBG12_HUMAN	GNG12	0.258305	3.8948	0.000164883	0.0013718
sp|O75489|NDUS3_HUMAN	NDUFS3	-0.137542	-3.89239	0.000166337	0.00138201
sp|P62333|PRS10_HUMAN	PSMC6	0.0548066	3.89243	0.000166313	0.00138201
sp|Q96ST3|SIN3A_HUMAN	SIN3A	0.0996037	3.89171	0.000166752	0.00138451
sp|Q13435|SF3B2_HUMAN	SF3B2	0.0825742	3.89137	0.000166955	0.00138525
tr|A0A140T9U8|A0A140T9U8_HUMAN	HLA-C	0.302084	3.89093	0.000167223	0.00138653
sp|Q13642|FHL1_HUMAN	FHL1	0.210074	3.88985	0.000167884	0.00139105
sp|O75385|ULK1_HUMAN	ULK1	-0.0942439	-3.88958	0.000168047	0.00139146
tr|F5H459|F5H459_HUMAN	AP3S1	-0.170781	-3.8886	0.000168649	0.00139549
sp|Q96GY0|ZC21A_HUMAN	ZC2HC1A	-0.195525	-3.88769	0.000169209	0.00139917
tr|A0A3B3IU55|A0A3B3IU55_HUMAN	STON2	0.263748	3.88732	0.000169438	0.00140012
sp|P61266|STX1B_HUMAN	STX1B	-0.183185	-3.886	0.000170253	0.00140589
sp|P0DPH7|TBA3C_HUMAN	TUBA3C	-0.0901436	-3.88537	0.000170645	0.00140817
sp|P51003|PAPOA_HUMAN	PAPOLA	0.123026	3.88482	0.000170985	0.00141002
sp|Q9HC07|TM165_HUMAN	TMEM165	0.214713	3.88431	0.000171305	0.00141056
sp|Q9UJF2|NGAP_HUMAN	RASAL2	-0.116727	-3.88416	0.000171399	0.00141056
tr|I3L3J7|I3L3J7_HUMAN	BAIAP2	-0.169289	-3.8843	0.00017131	0.00141056
tr|B7Z863|B7Z863_HUMAN	SLMAP	0.1161	3.88239	0.000172506	0.0014187
sp|P80217|IN35_HUMAN	IFI35	0.234471	3.88201	0.000172742	0.00141968
sp|P68036|UB2L3_HUMAN	UBE2L3	0.116731	3.88113	0.000173298	0.0014233
sp|P55160|NCKPL_HUMAN	NCKAP1L	0.192444	3.88052	0.000173684	0.00142539
sp|Q05639|EF1A2_HUMAN	EEF1A2	0.070766	3.88017	0.000173905	0.00142539
tr|H7BZN3|H7BZN3_HUMAN	RIF1	0.242496	3.88018	0.000173898	0.00142539
sp|P0DJD0|RGPD1_HUMAN	RGPD1	0.100373	3.87889	0.000174714	0.00143105
sp|Q9Y2H0-1|DLGP4-1_HUMAN	DLGAP4	-0.0948828	-3.87694	0.000175956	0.00144026
sp|Q9BRK0|REEP2_HUMAN	REEP2	-0.131979	-3.87651	0.000176234	0.00144156
sp|Q9P0Z9|SOX_HUMAN	PIPOX	0.241012	3.87617	0.000176449	0.00144235
sp|Q08499-10|PDE4D-10_HUMAN	PDE4D	-0.135221	-3.87583	0.000176666	0.00144315
tr|A0A0A6YYJ8|A0A0A6YYJ8_HUMAN	LUC7L2	0.112068	3.87302	0.000178477	0.00145696
sp|Q9NVS9|PNPO_HUMAN	PNPO	0.136279	3.87192	0.000179196	0.00146185
sp|Q2M389|WASC4_HUMAN	WASHC4	0.101065	3.87125	0.000179632	0.00146344
sp|Q9UHA4|LTOR3_HUMAN	LAMTOR3	0.119538	3.87136	0.000179558	0.00146344
sp|Q14151|SAFB2_HUMAN	SAFB2	0.111116	3.86951	0.000180771	0.00147173
tr|H0YML6|H0YML6_HUMAN	SPG21	0.172168	3.86912	0.000181025	0.00147281
sp|P98082|DAB2_HUMAN	DAB2	0.246533	3.86844	0.00018147	0.00147544
sp|Q92692-2|NECT2-2_HUMAN	NECTIN2	0.166981	3.8667	0.000182618	0.00148379
sp|Q9P1Y6|PHRF1_HUMAN	PHRF1	0.179358	3.86579	0.000183225	0.00148773
sp|P13667|PDIA4_HUMAN	PDIA4	0.125249	3.8644	0.000184153	0.00149426
sp|Q9Y3L5|RAP2C_HUMAN	RAP2C	-0.0978916	-3.86276	0.000185248	0.00150214
sp|Q9UK22|FBX2_HUMAN	FBXO2	0.163374	3.86231	0.000185548	0.00150357
sp|P06454|PTMA_HUMAN	PTMA	0.227441	3.86138	0.000186177	0.00150543
sp|P20618|PSB1_HUMAN	PSMB1	0.0651933	3.86177	0.000185912	0.00150543
sp|Q9HCM3|K1549_HUMAN	KIAA1549	-0.126828	-3.86126	0.00018626	0.00150543
sp|Q9UHI5|LAT2_HUMAN	SLC7A8	-0.227991	-3.86124	0.000186274	0.00150543
sp|Q8TD19|NEK9_HUMAN	NEK9	0.158836	3.85974	0.000187284	0.00151259
sp|O60939|SCN2B_HUMAN	SCN2B	-0.100405	-3.85917	0.000187675	0.00151374
sp|Q8N461|FXL16_HUMAN	FBXL16	-0.149352	-3.85921	0.000187648	0.00151374
sp|Q9NR46-2|SHLB2-2_HUMAN	SH3GLB2	-0.130686	-3.85707	0.000189105	0.00152426
sp|Q14789|GOGB1_HUMAN	GOLGB1	0.0685189	3.85678	0.000189305	0.00152486
sp|O00159-3|MYO1C-3_HUMAN	MYO1C	0.186569	3.85615	0.00018974	0.00152542
sp|O75145|LIPA3_HUMAN	PPFIA3	-0.0937779	-3.85629	0.00018964	0.00152542
tr|A0A0A6YYJ5|A0A0A6YYJ5_HUMAN	MACF1	0.0929486	3.85613	0.000189751	0.00152542
sp|P78329|CP4F2_HUMAN	CYP4F2	0.310436	3.85563	0.000190094	0.00152716
sp|O00233|PSMD9_HUMAN	PSMD9	0.128449	3.8551	0.000190462	0.00152911
sp|Q5JVS0|HABP4_HUMAN	HABP4	-0.1321	-3.85429	0.00019102	0.00153258
sp|Q9UK32-2|KS6A6-2_HUMAN	RPS6KA6	0.116192	3.85319	0.000191779	0.00153765
sp|P0DPH7-2|TBA3C-2_HUMAN	TUBA3C	-0.0892549	-3.85287	0.000192005	0.00153845
sp|Q03135|CAV1_HUMAN	CAV1	0.32909	3.85232	0.000192387	0.00153888
sp|Q8IUW5|RELL1_HUMAN	RELL1	0.266715	3.8525	0.00019226	0.00153888
sp|Q9UDR5|AASS_HUMAN	AASS	0.231285	3.85224	0.00019244	0.00153888
sp|Q9ULX6|AKP8L_HUMAN	AKAP8L	0.133388	3.85166	0.000192843	0.00154109
sp|Q9Y279|VSIG4_HUMAN	VSIG4	0.333229	3.85046	0.000193682	0.00154678
sp|P49189-3|AL9A1-3_HUMAN	ALDH9A1	0.193646	3.84926	0.000194529	0.00155253
sp|P37198|NUP62_HUMAN	NUP62	0.0873204	3.84751	0.000195762	0.00156134
sp|Q9HBI6|CP4FB_HUMAN	CYP4F11	0.263129	3.84581	0.000196969	0.00156994
sp|Q9Y6N8|CAD10_HUMAN	CDH10	-0.173223	-3.84358	0.00019856	0.00158158
tr|E9PND1|E9PND1_HUMAN	ADGRB2	-0.207314	-3.84287	0.000199073	0.00158463
tr|C9JI87|C9JI87_HUMAN	VDAC1	-0.111203	-3.84267	0.000199215	0.00158472
sp|P19367|HXK1_HUMAN	HK1	-0.132319	-3.84032	0.000200915	0.00159617
sp|Q9UBU9|NXF1_HUMAN	NXF1	0.0922174	3.84032	0.000200917	0.00159617
sp|Q8NAN2|MIGA1_HUMAN	MIGA1	-0.129664	-3.83961	0.000201432	0.00159922
sp|P14868|SYDC_HUMAN	DARS	0.101485	3.83923	0.00020171	0.00160037
sp|Q16891-4|MIC60-4_HUMAN	IMMT	-0.0915958	-3.83855	0.000202199	0.0016032
sp|P25391|LAMA1_HUMAN	LAMA1	0.223657	3.83835	0.000202347	0.00160332
sp|P49189|AL9A1_HUMAN	ALDH9A1	0.190111	3.83817	0.000202477	0.00160332
tr|F8VP71|F8VP71_HUMAN	LETMD1	-0.116122	-3.8372	0.000203193	0.00160794
sp|Q8NDH6|ICA1L_HUMAN	ICA1L	-0.101753	-3.83586	0.000204174	0.00161465
sp|Q8NB90|AFG2H_HUMAN	SPATA5	0.101992	3.83564	0.000204338	0.0016149
tr|I3L3C6|I3L3C6_HUMAN	BAIAP2	-0.156906	-3.83434	0.000205294	0.00162139
sp|P0CG47|UBB_HUMAN	UBB	0.079359	3.83373	0.000205752	0.00162246
sp|P51606|RENBP_HUMAN	RENBP	0.27677	3.83379	0.000205705	0.00162246
tr|A0A0A0MS29|A0A0A0MS29_HUMAN	MFF	-0.0912535	-3.83362	0.00020583	0.00162246
sp|Q01780|EXOSX_HUMAN	EXOSC10	0.113722	3.83132	0.000207544	0.00163295
sp|Q6P1J9|CDC73_HUMAN	CDC73	0.108388	3.83129	0.000207564	0.00163295
sp|Q93079|H2B1H_HUMAN	HIST1H2BH	0.208646	3.83149	0.000207417	0.00163295
sp|P00167|CYB5_HUMAN	CYB5A	0.127087	3.83027	0.000208334	0.00163795
sp|Q96C19|EFHD2_HUMAN	EFHD2	-0.151166	-3.82997	0.00020856	0.00163867
sp|Q9BYH1|SE6L1_HUMAN	SEZ6L	-0.14453	-3.82828	0.000209831	0.00164759
sp|P21964|COMT_HUMAN	COMT	0.182226	3.82733	0.000210551	0.00165111
sp|Q5VU97|CAHD1_HUMAN	CACHD1	0.201452	3.82739	0.000210503	0.00165111
sp|Q9UKA9|PTBP2_HUMAN	PTBP2	0.0766121	3.82689	0.000210887	0.00165268
sp|Q8WUY3|PRUN2_HUMAN	PRUNE2	-0.130962	-3.82631	0.000211327	0.00165506
sp|P22626|ROA2_HUMAN	HNRNPA2B1	0.101967	3.82581	0.000211708	0.00165697
sp|Q14789-2|GOGB1-2_HUMAN	GOLGB1	0.066702	3.8249	0.000212405	0.00166135
sp|P09622|DLDH_HUMAN	DLD	-0.114044	-3.8234	0.00021355	0.00166923
sp|Q15084|PDIA6_HUMAN	PDIA6	0.0965313	3.82236	0.00021435	0.00167441
sp|Q8N1F7|NUP93_HUMAN	NUP93	0.076273	3.82145	0.000215055	0.00167884
sp|O00267|SPT5H_HUMAN	SUPT5H	0.076943	3.82123	0.000215227	0.0016791
sp|Q06136|KDSR_HUMAN	KDSR	0.148761	3.82033	0.000215927	0.00168199
sp|Q32MZ4-3|LRRF1-3_HUMAN	LRRFIP1	0.0913264	3.82022	0.000216013	0.00168199
sp|Q9BQ61|TRIR_HUMAN	TRIR	0.147083	3.82027	0.000215968	0.00168199
tr|A0A1B0GV05|A0A1B0GV05_HUMAN	RAP1GAP2	-0.126002	-3.81888	0.000217052	0.001689
tr|H0Y3R8|H0Y3R8_HUMAN	TJP1	0.169689	3.8186	0.000217274	0.00168964
sp|A1A5D9|BICL2_HUMAN	BICDL2	0.42042	3.81785	0.000217862	0.00169314
sp|G9CGD6-3|CNIPF-3_HUMAN	CNK3	-0.209595	-3.81394	0.000220945	0.00171556
sp|P36915|GNL1_HUMAN	GNL1	-0.0614046	-3.81383	0.00022103	0.00171556
sp|P33176|KINH_HUMAN	KIF5B	0.0925351	3.81319	0.000221541	0.00171843
sp|P55268|LAMB2_HUMAN	LAMB2	0.265514	3.81286	0.000221806	0.00171938
sp|P49821|NDUV1_HUMAN	NDUFV1	-0.143292	-3.8123	0.000222253	0.00172175
sp|Q8IZR5-2|CKLF4-2_HUMAN	CMTM4	0.170577	3.81084	0.000223418	0.00172967
sp|Q96A73|P33MX_HUMAN	KIAA1191	-0.111589	-3.81004	0.000224062	0.00173355
sp|Q9Y4D8|HECD4_HUMAN	HECTD4	-0.0540299	-3.8097	0.000224331	0.00173453
sp|P29728|OAS2_HUMAN	OAS2	0.29531	3.80896	0.000224934	0.00173808
sp|Q92844|TANK_HUMAN	TANK	0.106804	3.80815	0.000225587	0.00173981
sp|Q9Y6E2|BZW2_HUMAN	BZW2	-0.127658	-3.80826	0.000225495	0.00173981
tr|Q5JXH8|Q5JXH8_HUMAN	FHL1	0.210065	3.80834	0.000225436	0.00173981
sp|Q7Z6G8-10|ANS1B-10_HUMAN	ANKS1B	-0.201842	-3.80759	0.000226039	0.0017422
sp|P17661|DESM_HUMAN	DES	0.354045	3.80707	0.000226463	0.00174436
sp|Q7Z4S6|KI21A_HUMAN	KIF21A	-0.0777525	-3.80669	0.000226771	0.00174562
sp|P19388|RPAB1_HUMAN	POLR2E	0.0862267	3.80587	0.000227444	0.00174969
sp|Q684P5|RPGP2_HUMAN	RAP1GAP2	-0.128766	-3.80496	0.000228181	0.00175314
sp|Q9UPA5|BSN_HUMAN	BSN	-0.177045	-3.80506	0.000228101	0.00175314
tr|F8WBA9|F8WBA9_HUMAN	SELENBP1	0.375003	3.80382	0.00022912	0.00175924
sp|Q14BN4|SLMAP_HUMAN	SLMAP	0.0753339	3.80243	0.000230267	0.00176693
sp|Q8WUD1|RAB2B_HUMAN	RAB2B	-0.0717251	-3.80151	0.000231029	0.00177166
sp|O14775|GNB5_HUMAN	GNB5	-0.159923	-3.80095	0.00023149	0.00177244
sp|Q9H1K1|ISCU_HUMAN	ISCU	-0.137023	-3.80086	0.000231568	0.00177244
tr|H0Y2V1|H0Y2V1_HUMAN	MAP4	0.143066	3.80116	0.000231314	0.00177244
tr|C9JJQ8|C9JJQ8_HUMAN	TUBA4A	-0.127155	-3.80006	0.000232227	0.00177636
sp|P18583|SON_HUMAN	SON	0.0913745	3.79973	0.000232502	0.00177734
sp|P50607|TUB_HUMAN	TUB	0.0983473	3.79888	0.000233218	0.0017817
tr|B5MCU0|B5MCU0_HUMAN	R3HDM2	-0.131706	-3.79843	0.000233589	0.00178341
sp|Q13185|CBX3_HUMAN	CBX3	0.0975659	3.7975	0.000234372	0.00178826
sp|P55087|AQP4_HUMAN	AQP4	0.291551	3.79586	0.000235755	0.00179769
sp|Q8N608|DPP10_HUMAN	DPP10	-0.159151	-3.79511	0.00023639	0.0018014
sp|Q9Y5Z7|HCFC2_HUMAN	HCFC2	0.112892	3.79481	0.000236644	0.0018022
tr|A0A0D9SGI7|A0A0D9SGI7_HUMAN	PLCB1	-0.190933	-3.79462	0.000236802	0.00180228
sp|P20039|2B1B_HUMAN	HLA-DRB1	0.416392	3.79421	0.00023715	0.0018038
sp|Q13017|RHG05_HUMAN	ARHGAP5	0.0823267	3.79393	0.000237386	0.00180446
sp|Q8NGA1|OR1M1_HUMAN	OR1M1	0.371157	3.78847	0.000242075	0.00183895
sp|O43488|ARK72_HUMAN	AKR7A2	0.165259	3.78804	0.000242449	0.00184064
tr|A0A2R8YE78|A0A2R8YE78_HUMAN	OPA1	-0.105713	-3.78737	0.000243031	0.00184391
sp|P50570-3|DYN2-3_HUMAN	DNM2	-0.0783587	-3.78718	0.000243189	0.00184395
tr|U3KQK0|U3KQK0_HUMAN	HIST1H2BN	0.206238	3.78632	0.000243942	0.00184851
sp|P14209|CD99_HUMAN	CD99	0.398659	3.78577	0.000244426	0.00185103
sp|P51857|AK1D1_HUMAN	AKR1D1	0.372623	3.78374	0.000246206	0.00186218
tr|M0QYM7|M0QYM7_HUMAN	TUBB4A	-0.0965416	-3.78379	0.000246155	0.00186218
tr|A0A1W2PQ25|A0A1W2PQ25_HUMAN	GFAP	0.736263	3.7829	0.000246943	0.00186659
sp|Q08J23|NSUN2_HUMAN	NSUN2	0.0888032	3.78272	0.000247101	0.00186662
sp|Q13685|AAMP_HUMAN	AAMP	0.104653	3.78236	0.000247424	0.0018679
tr|H3BQG3|H3BQG3_HUMAN	PDPR	0.147979	3.78096	0.000248662	0.00187608
sp|O95452|CXB6_HUMAN	GJB6	-0.314714	-3.78019	0.00024935	0.0018801
sp|Q9Y5Z4|HEBP2_HUMAN	HEBP2	0.201839	3.77932	0.000250123	0.00188477
sp|Q86Y39|NDUAB_HUMAN	NDUFA11	-0.146365	-3.77882	0.000250567	0.00188694
sp|Q7Z5Q1-5|CPEB2-5_HUMAN	CPEB2	-0.0816014	-3.77814	0.000251177	0.00188803
sp|Q7Z6G8|ANS1B_HUMAN	ANKS1B	-0.142261	-3.7783	0.000251033	0.00188803
tr|A0A0G2JH35|A0A0G2JH35_HUMAN	KCNQ2	-0.104683	-3.77823	0.000251094	0.00188803
sp|Q8N414|PGBD5_HUMAN	PGBD5	-0.103631	-3.77769	0.000251581	0.00188989
sp|P16885|PLCG2_HUMAN	PLCG2	0.135713	3.77751	0.000251748	0.00188998
sp|Q5JTJ3|COA6_HUMAN	COA6	-0.139637	-3.77728	0.000251948	0.00189031
sp|Q9ULU8|CAPS1_HUMAN	CADPS	-0.106258	-3.77686	0.000252325	0.00189197
sp|Q9BY42|RTF2_HUMAN	RTFDC1	0.162316	3.77618	0.000252944	0.00189544
sp|Q9NZN1|IRPL1_HUMAN	IL1RAPL1	-0.090477	-3.77554	0.000253524	0.00189861
tr|H0YJW7|H0YJW7_HUMAN	SLIRP	-0.144187	-3.77415	0.000254783	0.00190687
sp|O75592|MYCB2_HUMAN	MYCBP2	-0.0788922	-3.77383	0.000255077	0.0019079
sp|Q8NFH3|NUP43_HUMAN	NUP43	0.129064	3.77321	0.000255636	0.0019109
sp|P01889|1B07_HUMAN	HLA-B	0.292789	3.77254	0.000256247	0.00191339
tr|B8ZZP4|B8ZZP4_HUMAN	SCRN1	0.0923375	3.7725	0.000256284	0.00191339
sp|P27816|MAP4_HUMAN	MAP4	0.193874	3.77219	0.000256569	0.00191434
sp|O95670|VATG2_HUMAN	ATP6V1G2	-0.110945	-3.77157	0.000257138	0.00191506
sp|P62256|UBE2H_HUMAN	UBE2H	0.114765	3.77161	0.000257103	0.00191506
sp|Q8N6T3|ARFG1_HUMAN	ARFGAP1	-0.145817	-3.77185	0.000256886	0.00191506
sp|O95154|ARK73_HUMAN	AKR7A3	0.207815	3.77066	0.00025797	0.0019189
sp|P60842|IF4A1_HUMAN	EIF4A1	0.0761221	3.7708	0.000257847	0.0019189
sp|O75366|AVIL_HUMAN	AVIL	0.309362	3.77005	0.000258538	0.00192195
sp|P07737|PROF1_HUMAN	PFN1	0.127723	3.76932	0.000259207	0.00192574
sp|O75832|PSD10_HUMAN	PSMD10	0.117909	3.76902	0.000259488	0.00192665
sp|P15259|PGAM2_HUMAN	PGAM2	0.190147	3.76833	0.000260129	0.00193023
sp|Q06587|RING1_HUMAN	RING1	0.114077	3.76807	0.000260369	0.00193083
sp|P52824|DGKQ_HUMAN	DGKQ	-0.149222	-3.76598	0.000262313	0.00194329
tr|A0A2R8YGD3|A0A2R8YGD3_HUMAN	RAPGEF2	-0.107754	-3.76592	0.000262368	0.00194329
sp|Q01813|PFKAP_HUMAN	PFKP	-0.102653	-3.76527	0.000262974	0.00194563
sp|Q76NI1|KNDC1_HUMAN	KNDC1	-0.118281	-3.76517	0.000263074	0.00194563
tr|F5H1Z8|F5H1Z8_HUMAN	PTPN6	0.2581	3.76507	0.000263165	0.00194563
sp|Q16537-3|2A5E-3_HUMAN	PPP2R5E	-0.105062	-3.76435	0.000263842	0.00194945
sp|P24723|KPCL_HUMAN	PRKCH	-0.147725	-3.76338	0.000264756	0.00195501
sp|Q00325|MPCP_HUMAN	SLC25A3	-0.111965	-3.76201	0.000266053	0.00196339
sp|P68363|TBA1B_HUMAN	TUBA1B	-0.092446	-3.76149	0.000266541	0.0019658
sp|P55283|CADH4_HUMAN	CDH4	0.115671	3.75991	0.000268049	0.00197572
sp|P61981|1433G_HUMAN	YWHAG	-0.0735399	-3.75821	0.000269671	0.00198647
sp|Q9Y697|NFS1_HUMAN	NFS1	-0.114311	-3.75678	0.000271045	0.00199539
sp|P11047|LAMC1_HUMAN	LAMC1	0.296075	3.75634	0.000271478	0.00199736
tr|H0YJ11|H0YJ11_HUMAN	ACTN1	-0.181225	-3.75561	0.000272176	0.00200128
sp|Q6Y288|B3GLT_HUMAN	B3GLCT	0.237161	3.75518	0.000272593	0.00200244
sp|Q96FS4|SIPA1_HUMAN	SIPA1	0.124565	3.75511	0.000272664	0.00200244
sp|Q5SQH8-4|CF136-4_HUMAN	C6orf136	-0.121668	-3.75474	0.000273021	0.00200265
sp|Q9UK32|KS6A6_HUMAN	RPS6KA6	0.122968	3.75491	0.000272858	0.00200265
sp|P11441|UBL4A_HUMAN	UBL4A	-0.0825719	-3.7544	0.000273351	0.00200302
sp|P56537|IF6_HUMAN	EIF6	0.0854368	3.75435	0.000273402	0.00200302
sp|Q86U44|MTA70_HUMAN	METTL3	0.106077	3.75393	0.000273808	0.00200479
sp|Q7Z449|CP2U1_HUMAN	CYP2U1	0.189832	3.75339	0.000274332	0.00200741
sp|O75884|RBBP9_HUMAN	RBBP9	0.125576	3.7532	0.000274525	0.00200762
sp|Q9GZN7|ROGDI_HUMAN	ROGDI	-0.124204	-3.75253	0.000275178	0.00201118
tr|C9J9C1|C9J9C1_HUMAN	PPP2R1A	-0.0643788	-3.75145	0.000276238	0.00201771
tr|H7BZJ3|H7BZJ3_HUMAN	PDIA3	0.0786462	3.75113	0.000276545	0.00201874
sp|Q9H0U3|MAGT1_HUMAN	MAGT1	0.146938	3.75079	0.000276888	0.00202003
sp|Q53GT1|KLH22_HUMAN	KLHL22	-0.0754479	-3.7496	0.00027806	0.00202516
sp|Q8NBS9|TXND5_HUMAN	TXNDC5	0.110552	3.74957	0.00027809	0.00202516
tr|H0Y496|H0Y496_HUMAN	SNX30	-0.108215	-3.74981	0.000277848	0.00202516
sp|Q16798|MAON_HUMAN	ME3	-0.152138	-3.74896	0.000278687	0.00202829
sp|Q9UHI5-4|LAT2-4_HUMAN	SLC7A8	-0.225597	-3.74832	0.000279319	0.00203046
sp|Q9Y2G0|EFR3B_HUMAN	EFR3B	-0.109266	-3.74834	0.0002793	0.00203046
sp|Q96MU7|YTDC1_HUMAN	YTHDC1	0.114045	3.74755	0.000280093	0.00203486
sp|Q92974|ARHG2_HUMAN	ARHGEF2	-0.126322	-3.74624	0.000281393	0.00204309
sp|O43676|NDUB3_HUMAN	NDUFB3	-0.167716	-3.74472	0.000282916	0.00205292
sp|Q9H936|GHC1_HUMAN	SLC25A22	-0.185881	-3.74416	0.000283485	0.00205581
sp|P55008|AIF1_HUMAN	AIF1	0.261521	3.74335	0.000284294	0.00206046
sp|Q9H6S3|ES8L2_HUMAN	EPS8L2	0.185937	3.74232	0.000285336	0.00206554
sp|Q9NY65-2|TBA8-2_HUMAN	TUBA8	-0.0766573	-3.74244	0.00028522	0.00206554
tr|C9JDE9|C9JDE9_HUMAN	ACAA1	0.0975957	3.74151	0.000286162	0.00207028
sp|Q7Z434|MAVS_HUMAN	MAVS	0.195035	3.74077	0.000286911	0.00207447
sp|P56199|ITA1_HUMAN	ITGA1	0.212858	3.73852	0.000289212	0.00208986
sp|O43581|SYT7_HUMAN	SYT7	-0.165414	-3.73824	0.000289492	0.00209064
sp|P21796|VDAC1_HUMAN	VDAC1	-0.106121	-3.73655	0.00029124	0.00210202
sp|Q8N608-2|DPP10-2_HUMAN	DPP10	-0.155431	-3.73635	0.000291442	0.00210222
sp|Q13496|MTM1_HUMAN	MTM1	0.161079	3.73522	0.000292613	0.0021082
sp|Q16891-2|MIC60-2_HUMAN	IMMT	-0.0881534	-3.73522	0.000292618	0.0021082
tr|A0A096LP52|A0A096LP52_HUMAN	STXBP1	-0.153499	-3.7328	0.00029513	0.00212504
sp|Q8N257|H2B3B_HUMAN	HIST3H2BB	0.221106	3.73223	0.000295728	0.00212557
sp|Q9HCE6|ARGAL_HUMAN	ARHGEF10L	0.100971	3.73242	0.000295526	0.00212557
tr|J3QQX3|J3QQX3_HUMAN	FDXR	0.174	3.73238	0.000295574	0.00212557
sp|O00534|VMA5A_HUMAN	VWA5A	0.313177	3.73166	0.00029633	0.00212864
sp|Q9P121|NTRI_HUMAN	NTM	-0.118118	-3.73127	0.000296731	0.00213026
sp|Q15052|ARHG6_HUMAN	ARHGEF6	0.0741536	3.7311	0.000296911	0.00213029
sp|O60504|VINEX_HUMAN	SORBS3	0.190803	3.72896	0.000299176	0.00214527
sp|Q8ND76|CCNY_HUMAN	CCNY	-0.099965	-3.72762	0.000300591	0.00215288
sp|Q96RK4|BBS4_HUMAN	BBS4	0.173213	3.72777	0.000300439	0.00215288
sp|Q92900|RENT1_HUMAN	UPF1	0.0544014	3.72522	0.000303163	0.00217002
tr|A0A0D9SFQ7|A0A0D9SFQ7_HUMAN	STXBP1	-0.170339	-3.72459	0.000303837	0.00217356
tr|Q5TBG4|Q5TBG4_HUMAN	NEK6	0.240167	3.72361	0.000304894	0.00217984
sp|Q9UM54|MYO6_HUMAN	MYO6	0.149808	3.72261	0.000305971	0.00218625
sp|Q14839|CHD4_HUMAN	CHD4	0.0944506	3.72237	0.000306226	0.00218679
sp|P06748|NPM_HUMAN	NPM1	0.0845858	3.72218	0.000306431	0.00218697
sp|P49756|RBM25_HUMAN	RBM25	0.0971561	3.72154	0.000307126	0.00219064
sp|O00267-2|SPT5H-2_HUMAN	SUPT5H	0.0775464	3.7212	0.000307501	0.00219203
sp|O60241|AGRB2_HUMAN	ADGRB2	-0.11921	-3.71947	0.000309383	0.00220415
sp|Q8TAE6|PP14C_HUMAN	PPP1R14C	-0.184072	-3.71901	0.000309883	0.00220642
tr|H0Y412|H0Y412_HUMAN	PRRC2B	-0.106061	-3.71878	0.000310142	0.00220697
sp|Q96C23|GALM_HUMAN	GALM	0.25001	3.71821	0.000310759	0.00221006
sp|O75306|NDUS2_HUMAN	NDUFS2	-0.13359	-3.71664	0.000312489	0.00222107
sp|O14974|MYPT1_HUMAN	PPP1R12A	-0.0755391	-3.71555	0.000313699	0.00222836
sp|Q9UM54-2|MYO6-2_HUMAN	MYO6	0.15093	3.71337	0.000316124	0.00224297
tr|F8WES2|F8WES2_HUMAN	MTAP	0.26144	3.71345	0.000316027	0.00224297
sp|P23219-5|PGH1-5_HUMAN	PTGS1	0.231264	3.71062	0.000319201	0.00226216
sp|P62937|PPIA_HUMAN	PPIA	0.062659	3.71072	0.000319091	0.00226216
sp|Q86VH5|LRRT3_HUMAN	LRRTM3	-0.154094	-3.71037	0.000319485	0.00226285
sp|Q9Y4G8|RPGF2_HUMAN	RAPGEF2	-0.108111	-3.70961	0.000320339	0.00226757
tr|F8WF69|F8WF69_HUMAN	CLTA	-0.165513	-3.70925	0.000320755	0.0022692
tr|M0R0X0|M0R0X0_HUMAN	TUBB4A	-0.0906875	-3.70869	0.000321381	0.0022723
sp|Q92629|SGCD_HUMAN	SGCD	0.190633	3.7079	0.000322276	0.0022773
sp|P16112|PGCA_HUMAN	ACAN	0.251127	3.70752	0.000322709	0.00227904
sp|O00481|BT3A1_HUMAN	BTN3A1	0.227985	3.70711	0.000323185	0.00228107
sp|Q8NDH2|CC168_HUMAN	CCDC168	0.155488	3.70662	0.000323738	0.00228365
sp|Q9H8H3|MET7A_HUMAN	METTL7A	0.206997	3.70623	0.000324188	0.0022855
sp|P22732|GTR5_HUMAN	SLC2A5	0.265536	3.70402	0.000326714	0.00230064
tr|A0A0U1RR25|A0A0U1RR25_HUMAN	MADD	-0.167062	-3.70403	0.000326703	0.00230064
tr|F5H836|F5H836_HUMAN	PXN	0.236077	3.70258	0.000328385	0.00231106
sp|Q8N9R8|SCAI_HUMAN	SCAI	-0.164443	-3.70209	0.000328947	0.00231368
sp|Q08722|CD47_HUMAN	CD47	-0.136296	-3.70021	0.000331133	0.0023277
sp|P19338|NUCL_HUMAN	NCL	0.111013	3.69961	0.000331833	0.00232925
sp|Q641Q2|WAC2A_HUMAN	WASHC2A	0.0971761	3.69953	0.000331928	0.00232925
sp|Q9H853|TBA4B_HUMAN	TUBA4B	-0.0774468	-3.69963	0.000331807	0.00232925
sp|O43143|DHX15_HUMAN	DHX15	0.109778	3.6987	0.000332899	0.00233472
sp|O43684|BUB3_HUMAN	BUB3	0.087171	3.69751	0.000334295	0.0023418
sp|Q8WWN9|ICEF1_HUMAN	IPCEF1	-0.218317	-3.69767	0.000334109	0.0023418
sp|P56817|BACE1_HUMAN	BACE1	0.108229	3.69664	0.000335318	0.00234761
sp|P23527|H2B1O_HUMAN	HIST1H2BO	0.214289	3.69626	0.000335767	0.0023494
sp|Q9NSC5|HOME3_HUMAN	HOMER3	0.167341	3.69601	0.00033607	0.00235016
sp|Q9BW30|TPPP3_HUMAN	TPPP3	0.358675	3.69461	0.000337728	0.00235905
tr|H0YLY0|H0YLY0_HUMAN	CDC42BPB	-0.0667428	-3.6947	0.000337617	0.00235905
sp|P27361|MK03_HUMAN	MAPK3	0.135045	3.69411	0.000338324	0.0023605
sp|P61328|FGF12_HUMAN	FGF12	-0.161808	-3.69394	0.000338519	0.0023605
sp|Q12769|NU160_HUMAN	NUP160	0.107824	3.694	0.000338446	0.0023605
sp|Q9Y5I1|PCDAB_HUMAN	PCDHA11	-0.163034	-3.69301	0.000339635	0.00236692
sp|P53618|COPB_HUMAN	COPB1	0.0600936	3.69241	0.000340342	0.00237049
sp|Q05193|DYN1_HUMAN	DNM1	-0.126143	-3.69218	0.00034062	0.00237107
sp|P61964|WDR5_HUMAN	WDR5	0.097527	3.69065	0.00034246	0.00238251
sp|P62308|RUXG_HUMAN	SNRPG	0.134691	3.68998	0.000343262	0.00238672
sp|Q86VP1|TAXB1_HUMAN	TAX1BP1	-0.0865543	-3.68978	0.000343513	0.0023871
sp|Q24JP5|T132A_HUMAN	TMEM132A	0.109767	3.68929	0.000344102	0.00238983
tr|H0YJW3|H0YJW3_HUMAN	ACTN1	-0.149031	-3.68865	0.000344869	0.00239378
sp|Q04721|NOTC2_HUMAN	NOTCH2	0.119875	3.68842	0.000345156	0.00239441
sp|Q8TBX8|PI42C_HUMAN	PIP4K2C	-0.0980273	-3.68787	0.000345819	0.00239764
sp|P14207|FOLR2_HUMAN	FOLR2	0.283938	3.68728	0.000346539	0.00240126
sp|Q9HCS2|CP4FC_HUMAN	CYP4F12	0.296218	3.68588	0.000348243	0.00241169
sp|P41271|NBL1_HUMAN	NBL1	-0.300965	-3.68492	0.00034942	0.00241663
sp|Q04206|TF65_HUMAN	RELA	0.122313	3.6849	0.000349451	0.00241663
sp|Q9UNS1|TIM_HUMAN	TIMELESS	0.229061	3.68481	0.000349553	0.00241663
sp|O76039|CDKL5_HUMAN	CDKL5	-0.128405	-3.6846	0.000349814	0.00241706
sp|O14490-3|DLGP1-3_HUMAN	DLGAP1	-0.187228	-3.68248	0.000352424	0.00243353
sp|Q71U36|TBA1A_HUMAN	TUBA1A	-0.0905722	-3.68234	0.000352598	0.00243353
sp|Q16513|PKN2_HUMAN	PKN2	0.150886	3.68208	0.000352929	0.00243443
sp|P14621|ACYP2_HUMAN	ACYP2	0.223464	3.6804	0.000355013	0.00244742
tr|A0A3B3ISC6|A0A3B3ISC6_HUMAN	COPA	0.0534364	3.6802	0.000355258	0.00244771
sp|Q7L014|DDX46_HUMAN	DDX46	0.0759759	3.67966	0.00035593	0.00245039
sp|Q9NX46|ARHL2_HUMAN	ADPRHL2	0.0844113	3.67957	0.00035605	0.00245039
sp|Q13523|PRP4B_HUMAN	PRPF4B	0.099088	3.6784	0.000357508	0.00245783
sp|Q86UN3|R4RL2_HUMAN	RTN4RL2	-0.159641	-3.67838	0.000357535	0.00245783
sp|P02795|MT2_HUMAN	MT2A	0.327357	3.67705	0.000359206	0.00246792
sp|Q9H3U1|UN45A_HUMAN	UNC45A	0.116717	3.67646	0.000359954	0.00247166
sp|Q8IYB4-7|PEX5R-7_HUMAN	PEX5L	-0.119022	-3.67616	0.000360332	0.00247285
sp|P02745|C1QA_HUMAN	C1QA	0.295266	3.67574	0.000360856	0.00247505
sp|Q9P2R7|SUCB1_HUMAN	SUCLA2	-0.102352	-3.67239	0.000365116	0.00250144
tr|F5H5L8|F5H5L8_HUMAN	FOLR2	0.28311	3.67242	0.000365085	0.00250144
sp|P16949|STMN1_HUMAN	STMN1	-0.12342	-3.67122	0.000366618	0.00251032
sp|P46977|STT3A_HUMAN	STT3A	0.11694	3.67082	0.000367133	0.00251243
sp|Q5VWQ8|DAB2P_HUMAN	DAB2IP	-0.0931213	-3.67022	0.000367904	0.00251629
sp|P30043|BLVRB_HUMAN	BLVRB	0.172601	3.66909	0.000369367	0.00252405
tr|C9JX27|C9JX27_HUMAN	ATG9A	0.231712	3.66902	0.000369455	0.00252405
sp|Q02318|CP27A_HUMAN	CYP27A1	0.181442	3.66872	0.000369838	0.00252525
sp|Q9Y5S2|MRCKB_HUMAN	CDC42BPB	-0.0588799	-3.66753	0.000371383	0.00253438
sp|Q6DN03|H2B2C_HUMAN	HIST2H2BC	0.247587	3.66671	0.000372454	0.00254026
sp|Q9H6X2|ANTR1_HUMAN	ANTXR1	0.234389	3.66608	0.000373271	0.0025444
tr|A0A0D9SFE4|A0A0D9SFE4_HUMAN	DNM1	-0.124723	-3.66573	0.000373732	0.00254612
tr|U3KQ35|U3KQ35_HUMAN	TERF2	0.184299	3.66436	0.000375526	0.0025569
sp|Q8TB36|GDAP1_HUMAN	GDAP1	-0.110228	-3.66339	0.000376804	0.00256417
sp|O00541|PESC_HUMAN	PES1	0.0995225	3.66286	0.00037751	0.00256753
sp|Q9UQM7-2|KCC2A-2_HUMAN	CAMK2A	-0.178166	-3.66249	0.000377998	0.00256941
sp|Q14376|GALE_HUMAN	GALE	0.0734836	3.66122	0.00037968	0.00257796
sp|Q504Y0-3|S39AC-3_HUMAN	SLC39A12	0.251031	3.66137	0.000379475	0.00257796
sp|Q9BX66-10|SRBS1-10_HUMAN	SORBS1	0.16524	3.66012	0.000381143	0.00258645
tr|A0A3B3IRZ4|A0A3B3IRZ4_HUMAN	IQSEC1	-0.0873201	-3.65952	0.000381938	0.00259039
sp|O00159-2|MYO1C-2_HUMAN	MYO1C	0.178565	3.65876	0.000382951	0.00259582
sp|O75038|PLCH2_HUMAN	PLCH2	-0.12646	-3.65802	0.000383945	0.0026011
sp|P23508-2|CRCM-2_HUMAN	MCC	0.128213	3.65709	0.000385189	0.00260807
tr|G3V1M7|G3V1M7_HUMAN	ACADVL	0.153799	3.65644	0.000386068	0.00261257
sp|O43525|KCNQ3_HUMAN	KCNQ3	-0.111146	-3.65294	0.000390824	0.00264328
tr|F8VWL3|F8VWL3_HUMAN	FGD4	0.108011	3.65166	0.000392571	0.00265363
sp|O43674|NDUB5_HUMAN	NDUFB5	-0.152676	-3.65131	0.000393042	0.00265533
sp|Q92806|KCNJ9_HUMAN	KCNJ9	-0.21243	-3.65062	0.00039399	0.00266025
sp|O95810|CAVN2_HUMAN	CAVIN2	0.184463	3.65039	0.000394311	0.00266094
sp|Q13315|ATM_HUMAN	ATM	0.125793	3.64945	0.000395609	0.00266822
sp|P13716|HEM2_HUMAN	ALAD	0.216664	3.64918	0.000395975	0.00266921
sp|Q53H82|LACB2_HUMAN	LACTB2	0.129474	3.64816	0.000397389	0.00267586
sp|Q8N8A2-2|ANR44-2_HUMAN	ANKRD44	0.0753194	3.64815	0.000397403	0.00267586
sp|Q08828|ADCY1_HUMAN	ADCY1	-0.138663	-3.64755	0.000398233	0.00267997
sp|Q96M96|FGD4_HUMAN	FGD4	0.105728	3.64512	0.000401619	0.00270125
sp|Q9NQC3-3|RTN4-3_HUMAN	RTN4	-0.10704	-3.64465	0.000402277	0.00270418
sp|Q53H12|AGK_HUMAN	AGK	-0.130965	-3.64436	0.000402682	0.00270541
sp|Q16891|MIC60_HUMAN	IMMT	-0.0866478	-3.64387	0.000403379	0.00270859
tr|C9JJD3|C9JJD3_HUMAN	AP2M1	-0.129101	-3.6437	0.000403612	0.00270866
sp|Q9H1E3|NUCKS_HUMAN	NUCKS1	0.172412	3.64326	0.000404229	0.00271131
sp|P49354|FNTA_HUMAN	FNTA	0.156447	3.64226	0.000405639	0.00271926
sp|P55210|CASP7_HUMAN	CASP7	0.223966	3.64138	0.000406889	0.00272599
tr|A0A2R8Y6Y7|A0A2R8Y6Y7_HUMAN	SUCLA2	-0.100918	-3.64124	0.000407091	0.00272599
sp|P08571|CD14_HUMAN	CD14	0.354356	3.63905	0.000410212	0.00274537
sp|O14490-4|DLGP1-4_HUMAN	DLGAP1	-0.195309	-3.6377	0.000412132	0.0027567
sp|P48436|SOX9_HUMAN	SOX9	0.198068	3.63689	0.000413301	0.002763
sp|Q14683|SMC1A_HUMAN	SMC1A	0.176299	3.63652	0.000413834	0.00276504
tr|F5GYV5|F5GYV5_HUMAN	ARL6IP4	0.141951	3.63581	0.000414856	0.00277034
sp|O14974-4|MYPT1-4_HUMAN	PPP1R12A	-0.0703257	-3.63516	0.000415802	0.00277296
sp|P17677|NEUM_HUMAN	GAP43	-0.19063	-3.63491	0.000416162	0.00277296
sp|P42566|EPS15_HUMAN	EPS15	0.158123	3.63501	0.000416015	0.00277296
tr|B8ZZB8|B8ZZB8_HUMAN	CNRIP1	-0.105345	-3.63502	0.000416003	0.00277296
sp|P50570|DYN2_HUMAN	DNM2	-0.072167	-3.63449	0.000416763	0.00277545
sp|O95571|ETHE1_HUMAN	ETHE1	0.1326	3.63415	0.000417257	0.00277722
sp|P0DKX4|SIM18_HUMAN	SMIM18	-0.159263	-3.63366	0.00041797	0.00278044
sp|Q9H8W4|PKHF2_HUMAN	PLEKHF2	0.169292	3.63077	0.000422195	0.002807
sp|Q9UM54-6|MYO6-6_HUMAN	MYO6	0.147021	3.6306	0.00042245	0.00280716
tr|A0A0C4DGT3|A0A0C4DGT3_HUMAN	IQSEC1	-0.0952967	-3.62986	0.000423527	0.00281279
sp|O76039-2|CDKL5-2_HUMAN	CDKL5	-0.130714	-3.62962	0.000423885	0.00281362
sp|Q8IWW6|RHG12_HUMAN	ARHGAP12	0.118928	3.62897	0.000424837	0.0028184
sp|Q96BY7|ATG2B_HUMAN	ATG2B	-0.0762023	-3.62875	0.000425166	0.00281905
sp|Q765P7|MTSSL_HUMAN	MTSS1L	0.161653	3.62859	0.000425402	0.00281907
sp|P55058-4|PLTP-4_HUMAN	PLTP	0.167503	3.62766	0.000426777	0.00282664
sp|O75131|CPNE3_HUMAN	CPNE3	0.18215	3.62704	0.000427696	0.00283118
sp|Q99685|MGLL_HUMAN	MGLL	-0.164386	-3.62638	0.000428678	0.00283614
tr|E7EW20|E7EW20_HUMAN	MYO6	0.147584	3.62543	0.000430094	0.00284396
sp|P49748|ACADV_HUMAN	ACADVL	0.166666	3.62513	0.000430542	0.00284537
sp|P62987|RL40_HUMAN	UBA52	0.0730377	3.62489	0.000430911	0.00284626
tr|A0A2R8Y7Y4|A0A2R8Y7Y4_HUMAN	ANKRD44	0.0766719	3.62441	0.000431628	0.00284945
sp|Q16566|KCC4_HUMAN	CAMK4	-0.147741	-3.62424	0.000431883	0.00284958
sp|Q96KP4-2|CNDP2-2_HUMAN	CNDP2	0.155437	3.6202	0.000437979	0.00288823
sp|Q96DR7|ARHGQ_HUMAN	ARHGEF26	0.150124	3.6192	0.000439502	0.00289671
sp|Q9Y259|CHKB_HUMAN	CHKB	0.112139	3.61787	0.000441535	0.00290853
tr|A0A0C4DGN7|A0A0C4DGN7_HUMAN	FDXR	0.171487	3.61753	0.000442055	0.00291038
sp|O43896|KIF1C_HUMAN	KIF1C	0.0808817	3.61714	0.000442654	0.00291274
sp|O60264|SMCA5_HUMAN	SMARCA5	0.0957705	3.61641	0.000443779	0.00291856
sp|P61966|AP1S1_HUMAN	AP1S1	-0.128017	-3.61619	0.000444116	0.0029192
sp|O94925|GLSK_HUMAN	GLS	-0.121367	-3.6156	0.000445013	0.00292351
sp|O14556|G3PT_HUMAN	GAPDHS	0.0796452	3.61521	0.000445622	0.00292593
sp|P28331|NDUS1_HUMAN	NDUFS1	-0.131842	-3.61373	0.000447909	0.00293833
sp|Q9H3P7|GCP60_HUMAN	ACBD3	0.0740947	3.61368	0.000447994	0.00293833
sp|Q5RKV6|EXOS6_HUMAN	EXOSC6	0.128061	3.61336	0.000448483	0.00293914
sp|Q8NE01|CNNM3_HUMAN	CNNM3	0.106858	3.61329	0.000448602	0.00293914
sp|Q9NWB6|ARGL1_HUMAN	ARGLU1	0.107732	3.61144	0.000451475	0.00295637
sp|Q14BN4-3|SLMAP-3_HUMAN	SLMAP	0.0726149	3.61104	0.000452103	0.0029573
sp|Q7Z4V5|HDGR2_HUMAN	HDGFL2	0.0865902	3.61118	0.000451881	0.0029573
tr|E9PMS6|E9PMS6_HUMAN	LMO7	-0.149858	-3.60988	0.000453921	0.00296759
sp|Q16401|PSMD5_HUMAN	PSMD5	0.104838	3.60913	0.0004551	0.0029737
sp|Q15361|TTF1_HUMAN	TTF1	0.238902	3.60882	0.0004556	0.00297536
sp|P49257|LMAN1_HUMAN	LMAN1	0.0940367	3.60697	0.000458528	0.00299287
sp|Q96Q04|LMTK3_HUMAN	LMTK3	-0.105047	-3.60627	0.000459638	0.00299851
sp|P63215|GBG3_HUMAN	GNG3	-0.209726	-3.60556	0.000460765	0.00300425
sp|O43581-2|SYT7-2_HUMAN	SYT7	-0.166456	-3.60525	0.000461258	0.00300585
sp|O75396|SC22B_HUMAN	SEC22B	0.0633309	3.60459	0.000462307	0.00301107
sp|Q8NFJ9|BBS1_HUMAN	BBS1	0.122451	3.60421	0.000462926	0.00301348
tr|C9JG97|C9JG97_HUMAN	AAMP	0.102112	3.60327	0.000464434	0.00302168
sp|Q9NPQ8|RIC8A_HUMAN	RIC8A	0.0677694	3.60171	0.000466932	0.00303631
sp|O75038-2|PLCH2-2_HUMAN	PLCH2	-0.12952	-3.60133	0.000467546	0.00303867
sp|P09874|PARP1_HUMAN	PARP1	0.174546	3.60098	0.000468115	0.00304075
sp|P49815|TSC2_HUMAN	TSC2	-0.0593546	-3.59979	0.000470044	0.00305001
tr|A0A2R8Y7C8|A0A2R8Y7C8_HUMAN	TSC2	-0.0593546	-3.59979	0.000470044	0.00305001
sp|O94985-2|CSTN1-2_HUMAN	CLSTN1	-0.128536	-3.59774	0.000473391	0.00306775
sp|O95057|DIRA1_HUMAN	DIRAS1	-0.147141	-3.59794	0.000473055	0.00306775
sp|Q9UPX8|SHAN2_HUMAN	SHANK2	-0.13808	-3.59765	0.000473535	0.00306775
sp|Q13740|CD166_HUMAN	ALCAM	0.186856	3.59652	0.000475396	0.00307816
sp|P13746|1A11_HUMAN	HLA-A	0.572391	3.59421	0.000479195	0.00309219
sp|P14550|AK1A1_HUMAN	AKR1A1	0.126864	3.59456	0.000478618	0.00309219
sp|Q10713-2|MPPA-2_HUMAN	PMPCA	-0.102139	-3.59488	0.000478095	0.00309219
sp|Q13480-2|GAB1-2_HUMAN	GAB1	0.255733	3.59471	0.000478376	0.00309219
sp|Q92665|RT31_HUMAN	MRPS31	-0.129204	-3.59412	0.000479345	0.00309219
sp|Q96KP4|CNDP2_HUMAN	CNDP2	0.157212	3.59414	0.000479313	0.00309219
sp|Q9UHY1|NRBP_HUMAN	NRBP1	-0.113693	-3.59464	0.000478492	0.00309219
sp|Q6ZV73|FGD6_HUMAN	FGD6	0.176881	3.59393	0.000479659	0.00309258
sp|Q13491-4|GPM6B-4_HUMAN	GPM6B	-0.112346	-3.59323	0.000480811	0.00309836
tr|A0A0J9YW31|A0A0J9YW31_HUMAN	EPB41L3	-0.145004	-3.5921	0.000482693	0.00310884
sp|Q14C87|T132D_HUMAN	TMEM132D	-0.141977	-3.59137	0.000483906	0.003115
sp|Q9BXX0|EMIL2_HUMAN	EMILIN2	0.235929	3.59038	0.000485567	0.00312403
sp|Q9P2L0|WDR35_HUMAN	WDR35	0.123734	3.59005	0.000486119	0.00312594
tr|H0YLS6|H0YLS6_HUMAN	PSMA4	0.0998532	3.5897	0.000486714	0.0031281
tr|E9PQR4|E9PQR4_HUMAN	TUB	0.0923618	3.58928	0.000487415	0.00313095
sp|Q9BXQ6|T121B_HUMAN	TMEM121B	-0.19404	-3.58867	0.000488435	0.00313585
sp|P60174|TPIS_HUMAN	TPI1	-0.0604014	-3.58698	0.000491292	0.00315089
sp|Q6DN90|IQEC1_HUMAN	IQSEC1	-0.0922639	-3.58698	0.000491297	0.00315089
sp|O60841|IF2P_HUMAN	EIF5B	0.0689358	3.58666	0.000491837	0.00315269
sp|P05771-2|KPCB-2_HUMAN	PRKCB	-0.0890964	-3.58633	0.000492404	0.00315466
tr|H0YJ07|H0YJ07_HUMAN	SLIRP	-0.14813	-3.58612	0.000492754	0.00315524
sp|Q13362-2|2A5G-2_HUMAN	PPP2R5C	-0.0796885	-3.58592	0.000493088	0.00315571
sp|O15117-2|FYB1-2_HUMAN	FYB1	0.252869	3.58559	0.000493649	0.00315764
sp|Q13325|IFIT5_HUMAN	IFIT5	0.165739	3.58538	0.000494013	0.00315831
sp|Q9P2D3|HTR5B_HUMAN	HEATR5B	-0.054941	-3.58493	0.000494777	0.00316152
sp|O14523|C2C2L_HUMAN	C2CD2L	-0.0912292	-3.58435	0.000495771	0.00316621
sp|Q86YS7-2|C2CD5-2_HUMAN	C2CD5	-0.0966984	-3.58388	0.000496569	0.00316964
sp|P23458|JAK1_HUMAN	JAK1	0.0918071	3.58347	0.000497278	0.0031725
sp|Q96IX5|USMG5_HUMAN	ATP5MD	-0.162443	-3.58232	0.000499247	0.00318339
sp|O14490-5|DLGP1-5_HUMAN	DLGAP1	-0.204512	-3.58065	0.000502127	0.00320007
sp|Q7Z5Q1-3|CPEB2-3_HUMAN	CPEB2	-0.0745631	-3.5801	0.000503082	0.00320447
tr|A8MYR7|A8MYR7_HUMAN	DLGAP1	-0.211021	-3.57995	0.000503347	0.00320448
sp|Q6PUV4|CPLX2_HUMAN	CPLX2	-0.186541	-3.57979	0.000503616	0.00320451
sp|Q9NZ72|STMN3_HUMAN	STMN3	-0.156751	-3.57908	0.000504842	0.00321064
sp|P62979|RS27A_HUMAN	RPS27A	0.0717869	3.57822	0.000506343	0.00321464
sp|Q10472|GALT1_HUMAN	GALNT1	0.164365	3.57823	0.000506328	0.00321464
sp|Q5BKZ1|ZN326_HUMAN	ZNF326	0.12007	3.57812	0.000506523	0.00321464
tr|Q5T9Q8|Q5T9Q8_HUMAN	SUCLA2	-0.1131	-3.57811	0.000506531	0.00321464
sp|P53621|COPA_HUMAN	COPA	0.0548124	3.57764	0.000507366	0.00321826
sp|Q9BWJ5|SF3B5_HUMAN	SF3B5	0.106735	3.57661	0.000509161	0.00322796
sp|Q7Z4V5-2|HDGR2-2_HUMAN	HDGFL2	0.0872449	3.57508	0.000511848	0.00324331
sp|Q9HAU0-6|PKHA5-6_HUMAN	PLEKHA5	0.085135	3.57453	0.000512818	0.00324704
sp|Q9NYL2-2|M3K20-2_HUMAN	MAP3K20	0.246685	3.57444	0.000512972	0.00324704
sp|O15439|MRP4_HUMAN	ABCC4	0.240877	3.57321	0.000515141	0.00325693
sp|O75477|ERLN1_HUMAN	ERLIN1	0.187651	3.5731	0.000515339	0.00325693
tr|F8VWR9|F8VWR9_HUMAN	PPFIA2	-0.111009	-3.57316	0.000515241	0.00325693
sp|Q14155-1|ARHG7-1_HUMAN	ARHGEF7	-0.0754522	-3.57239	0.000516606	0.00326324
sp|Q14194|DPYL1_HUMAN	CRMP1	-0.0733032	-3.57157	0.000518059	0.00326913
sp|Q8WUY3-3|PRUN2-3_HUMAN	PRUNE2	-0.122892	-3.57156	0.000518076	0.00326913
sp|O95183|VAMP5_HUMAN	VAMP5	0.260851	3.57089	0.000519275	0.0032699
sp|P56962|STX17_HUMAN	STX17	-0.224735	-3.57112	0.000518857	0.0032699
sp|Q99536|VAT1_HUMAN	VAT1	0.210374	3.571	0.000519078	0.0032699
sp|Q9ULU8-2|CAPS1-2_HUMAN	CADPS	-0.104365	-3.57098	0.000519107	0.0032699
sp|Q9NQS3|NECT3_HUMAN	NECTIN3	-0.147447	-3.57048	0.000520003	0.00327279
sp|Q7Z406|MYH14_HUMAN	MYH14	0.10874	3.57032	0.00052029	0.00327289
sp|Q8N4Q0|PTGR3_HUMAN	ZADH2	-0.135986	-3.57015	0.000520591	0.0032731
sp|O94985|CSTN1_HUMAN	CLSTN1	-0.125898	-3.56949	0.000521768	0.0032788
sp|P50579-2|MAP2-2_HUMAN	METAP2	0.0915723	3.56928	0.000522149	0.00327949
sp|Q5VV42|CDKAL_HUMAN	CDKAL1	0.15831	3.56898	0.000522696	0.00328123
sp|Q9UGV2|NDRG3_HUMAN	NDRG3	-0.0689761	-3.56881	0.000523003	0.00328146
sp|Q92973|TNPO1_HUMAN	TNPO1	0.0956124	3.56843	0.000523674	0.00328398
sp|Q8TCE6|FA45A_HUMAN	FAM45A	0.0841488	3.56721	0.000525878	0.0032961
sp|P29034|S10A2_HUMAN	S100A2	0.510528	3.56672	0.000526768	0.00329765
sp|Q86VP1-2|TAXB1-2_HUMAN	TAX1BP1	-0.0841832	-3.56662	0.000526939	0.00329765
sp|Q8NEZ3|WDR19_HUMAN	WDR19	0.108441	3.56682	0.000526588	0.00329765
sp|Q12979|ABR_HUMAN	ABR	-0.0883568	-3.56619	0.000527727	0.00330088
sp|Q53EL6|PDCD4_HUMAN	PDCD4	0.13373	3.56593	0.000528192	0.00330208
sp|Q7Z4S6-4|KI21A-4_HUMAN	KIF21A	-0.0733145	-3.5656	0.000528785	0.00330409
sp|P42685|FRK_HUMAN	FRK	-0.140611	-3.56507	0.000529748	0.0033084
sp|Q10713|MPPA_HUMAN	PMPCA	-0.0929631	-3.56484	0.000530171	0.00330935
sp|P05230|FGF1_HUMAN	FGF1	0.336721	3.56349	0.000532628	0.00332298
sp|O14639|ABLM1_HUMAN	ABLIM1	0.137891	3.56312	0.000533321	0.00332559
sp|P04271|S100B_HUMAN	S100B	0.300479	3.56248	0.000534494	0.00333087
sp|P21453|S1PR1_HUMAN	S1PR1	0.169236	3.56235	0.000534717	0.00333087
sp|Q9UI12|VATH_HUMAN	ATP6V1H	-0.0991261	-3.562	0.000535365	0.0033332
sp|P27695|APEX1_HUMAN	APEX1	0.121938	3.56068	0.000537803	0.00334667
sp|Q96NN9-2|AIFM3-2_HUMAN	AIFM3	0.114306	3.56027	0.000538558	0.00334965
sp|Q15286|RAB35_HUMAN	RAB35	-0.0795845	-3.55967	0.000539665	0.0033531
sp|Q9NZQ3|SPN90_HUMAN	NCKIPSD	-0.0862797	-3.55976	0.000539493	0.0033531
sp|P62699|YPEL5_HUMAN	YPEL5	0.154762	3.55888	0.000541119	0.00335972
sp|Q92499|DDX1_HUMAN	DDX1	0.0737574	3.5588	0.000541283	0.00335972
sp|P29803|ODPAT_HUMAN	PDHA2	-0.12947	-3.55856	0.000541722	0.00336073
sp|P48740-3|MASP1-3_HUMAN	MASP1	0.227394	3.55577	0.000546926	0.00339127
sp|Q16832|DDR2_HUMAN	DDR2	0.129085	3.5552	0.000547992	0.00339315
sp|Q96QH2|PRAM_HUMAN	PRAM1	0.229862	3.55538	0.000547661	0.00339315
sp|Q9BQE4|SELS_HUMAN	SELENOS	0.216645	3.55516	0.000548066	0.00339315
sp|O95258|UCP5_HUMAN	SLC25A14	-0.148825	-3.55231	0.000553447	0.00342409
tr|F8VWQ5|F8VWQ5_HUMAN	CS	-0.13817	-3.55222	0.000553627	0.00342409
sp|Q9C0C9|UBE2O_HUMAN	UBE2O	-0.0986411	-3.55161	0.000554775	0.00342944
sp|Q96F10|SAT2_HUMAN	SAT2	0.395514	3.55089	0.000556147	0.00343617
sp|Q8TCD5|NT5C_HUMAN	NT5C	0.16634	3.54933	0.000559125	0.00345281
sp|P16615|AT2A2_HUMAN	ATP2A2	-0.106563	-3.54844	0.000560831	0.00346159
sp|O95999|BCL10_HUMAN	BCL10	0.174519	3.54738	0.000562861	0.00346884
sp|P08651|NFIC_HUMAN	NFIC	0.192115	3.54764	0.000562359	0.00346884
sp|Q9P0L2|MARK1_HUMAN	MARK1	-0.188832	-3.54748	0.000562682	0.00346884
sp|O75962|TRIO_HUMAN	TRIO	-0.0857946	-3.54692	0.000563746	0.00347248
tr|H0Y424|H0Y424_HUMAN	LMO7	-0.163496	-3.54678	0.000564024	0.00347248
sp|Q14195-2|DPYL3-2_HUMAN	DPYSL3	0.113202	3.54611	0.000565319	0.00347869
sp|P00533|EGFR_HUMAN	EGFR	0.170959	3.54587	0.000565773	0.00347972
sp|O75663|TIPRL_HUMAN	TIPRL	-0.0984384	-3.54497	0.00056753	0.00348421
sp|P00491|PNPH_HUMAN	PNP	0.189267	3.54446	0.000568511	0.00348421
sp|Q15906|VPS72_HUMAN	VPS72	0.175343	3.54489	0.000567686	0.00348421
sp|Q5ZPR3|CD276_HUMAN	CD276	0.179252	3.54517	0.00056714	0.00348421
sp|Q9ULD0|OGDHL_HUMAN	OGDHL	-0.13553	-3.54456	0.000568321	0.00348421
tr|A0A1B0GW23|A0A1B0GW23_HUMAN	ABHD14A-ACY1	0.158516	3.54461	0.000568233	0.00348421
tr|H3BNA6|H3BNA6_HUMAN	SYNGR3	-0.205305	-3.54532	0.000566837	0.00348421
sp|O43493|TGON2_HUMAN	TGOLN2	0.0981689	3.54404	0.000569326	0.00348569
sp|Q9NPH2|INO1_HUMAN	ISYNA1	0.203685	3.54407	0.000569273	0.00348569
sp|O14490-2|DLGP1-2_HUMAN	DLGAP1	-0.198431	-3.54368	0.000570033	0.00348826
tr|A0A0U1RQP1|A0A0U1RQP1_HUMAN	DNM1	-0.120618	-3.54201	0.000573286	0.00350463
tr|I3L0K7|I3L0K7_HUMAN	TRAP1	-0.0893338	-3.54215	0.000573015	0.00350463
sp|Q13740-2|CD166-2_HUMAN	ALCAM	0.183733	3.54116	0.000574971	0.00351317
sp|Q08477|CP4F3_HUMAN	CYP4F3	0.296937	3.5406	0.000576074	0.00351813
tr|A0A0U1RQZ9|A0A0U1RQZ9_HUMAN	SMARCA2	0.0711337	3.54	0.000577246	0.00352352
sp|P22570|ADRO_HUMAN	FDXR	0.161995	3.53962	0.000578003	0.00352489
sp|Q9NUJ3|T11L1_HUMAN	TCP11L1	-0.0864652	-3.53959	0.00057805	0.00352489
tr|A0A1C7CYX1|A0A1C7CYX1_HUMAN	ELMSAN1	0.152485	3.53902	0.000579187	0.00353005
sp|O00391|QSOX1_HUMAN	QSOX1	0.148275	3.53878	0.000579666	0.00353119
sp|Q8IZ21|PHAR4_HUMAN	PHACTR4	0.168381	3.53825	0.000580701	0.00353396
sp|Q96EE3|SEH1_HUMAN	SEH1L	0.0927755	3.53839	0.000580425	0.00353396
sp|O60268|K0513_HUMAN	KIAA0513	-0.160914	-3.53743	0.000582329	0.00354032
[truncated: 10,150 more rows]

## Sheet: Supplementary dataS4B
Supplementary data S4B The female-specific DEP analysis in the human cohort MSBB.
Note: human female subjects were classified by CERAD into AD (with a CERAD of 2), MCI (CERAD of 3or 4) and NL (CERAD = 1). The male-specific DEPs were in AD vs NL. adjP.Val, BH-adjusted p value.
Protein	Symbol	logFC	t	P.Value	adj.P.Val
sp|P21741|MK_HUMAN	MDK	2.05903	9.27377	9.64395e-14	1.17145e-09
sp|Q9H4F8|SMOC1_HUMAN	SMOC1	0.815949	7.58674	1.14867e-10	6.97644e-07
cu|P05067-108|A4_Abeta42_HUMAN	APP	2.20288	7.0983	8.8919e-10	3.60033e-06
sp|Q96CG8|CTHR1_HUMAN	CTHRC1	1.01686	7.01556	1.25587e-09	3.81376e-06
sp|Q8N474|SFRP1_HUMAN	SFRP1	0.674321	6.45459	1.28347e-08	3.11806e-05
sp|P04792|HSPB1_HUMAN	HSPB1	0.59205	5.98232	8.80437e-08	0.000178244
tr|F8WE04|F8WE04_HUMAN	HSPB1	0.589079	5.59201	4.19604e-07	0.000728133
sp|Q8WZA9|IRGQ_HUMAN	IRGQ	-0.178307	-5.52278	5.5161e-07	0.000744489
sp|Q96AQ6|PBIP1_HUMAN	PBXIP1	0.427297	5.53749	5.20505e-07	0.000744489
sp|O95631|NET1_HUMAN	NTN1	0.605487	5.38175	9.59627e-07	0.00116566
tr|X6R3P0|X6R3P0_HUMAN	SLIT2	0.212098	5.29079	1.36792e-06	0.00151056
sp|Q6UX53|MET7B_HUMAN	METTL7B	0.46904	5.25377	1.57918e-06	0.00159852
sp|P05362|ICAM1_HUMAN	ICAM1	0.731523	5.2214	1.78998e-06	0.00167253
sp|O00634|NET3_HUMAN	NTN3	0.876893	5.12059	2.63943e-06	0.00213154
sp|Q07812-5|BAX-5_HUMAN	BAX	0.157722	5.13073	2.53861e-06	0.00213154
sp|Q9NPD7|NRN1_HUMAN	NRN1	-0.572059	-5.07372	3.15862e-06	0.00213154
tr|E7ENQ8|E7ENQ8_HUMAN	PGM2	0.260052	5.08641	3.00888e-06	0.00213154
tr|H0YAS8|H0YAS8_HUMAN	CLU	0.240803	5.09494	2.91219e-06	0.00213154
sp|O14558|HSPB6_HUMAN	HSPB6	0.465887	5.0451	3.52351e-06	0.00220871
sp|Q9UPZ6|THS7A_HUMAN	THSD7A	0.229854	5.03681	3.63663e-06	0.00220871
sp|O14920|IKKB_HUMAN	IKBKB	0.171388	4.98233	4.47434e-06	0.00236303
sp|P14209|CD99_HUMAN	CD99	0.567494	4.98595	4.41327e-06	0.00236303
sp|Q92563|TICN2_HUMAN	SPOCK2	0.259028	4.98995	4.34682e-06	0.00236303
tr|K7EKL8|K7EKL8_HUMAN	ICAM1	0.667285	4.96324	4.81041e-06	0.00243467
sp|P34896|GLYC_HUMAN	SHMT1	0.33247	4.92588	5.54112e-06	0.00269232
sp|Q92743|HTRA1_HUMAN	HTRA1	0.400892	4.89206	6.29544e-06	0.00288428
sp|Q9Y653|AGRG1_HUMAN	ADGRG1	0.26032	4.88723	6.41109e-06	0.00288428
sp|P52298|NCBP2_HUMAN	NCBP2	0.152289	4.85782	7.16111e-06	0.00310664
sp|O94813|SLIT2_HUMAN	SLIT2	0.217077	4.84493	7.5163e-06	0.00314829
sp|O43815|STRN_HUMAN	STRN	-0.0845286	-4.82564	8.08009e-06	0.00327163
sp|Q8IW45-2|NNRD-2_HUMAN	NAXD	0.116086	4.79621	9.02071e-06	0.00353466
sp|P46939|UTRO_HUMAN	UTRN	0.282925	4.75039	1.07019e-05	0.003611
sp|Q07812|BAX_HUMAN	BAX	0.154244	4.75388	1.05636e-05	0.003611
sp|Q15349|KS6A2_HUMAN	RPS6KA2	0.20345	4.76816	1.00163e-05	0.003611
sp|Q9UBK8|MTRR_HUMAN	MTRR	0.252436	4.76012	1.03208e-05	0.003611
tr|K7EPT8|K7EPT8_HUMAN	GFAP	0.732794	4.76498	1.01357e-05	0.003611
sp|O94813-2|SLIT2-2_HUMAN	SLIT2	0.209559	4.72826	1.16195e-05	0.00361902
sp|P03905|NU4M_HUMAN	MT-ND4	-0.199855	-4.73025	1.15337e-05	0.00361902
tr|A0A1W2PS58|A0A1W2PS58_HUMAN	GFAP	0.729264	4.73529	1.132e-05	0.00361902
sp|P08670|VIME_HUMAN	VIM	0.628832	4.67181	1.43217e-05	0.00424306
sp|Q15349-2|KS6A2-2_HUMAN	RPS6KA2	0.205778	4.67736	1.40313e-05	0.00424306
sp|P10909|CLUS_HUMAN	CLU	0.227822	4.64477	1.58242e-05	0.00436855
sp|P26006|ITA3_HUMAN	ITGA3	0.339153	4.64675	1.57092e-05	0.00436855
sp|Q9UI15|TAGL3_HUMAN	TAGLN3	-0.22244	-4.6522	1.53968e-05	0.00436855
tr|B0YJC5|B0YJC5_HUMAN	VIM	0.621419	4.58876	1.94406e-05	0.00524767
sp|Q02156|KPCE_HUMAN	PRKCE	-0.174639	-4.58115	1.99905e-05	0.0052788
sp|Q9BXS0|COPA1_HUMAN	COL25A1	0.889356	4.56735	2.10261e-05	0.00543412
tr|H3BUX2|H3BUX2_HUMAN	CYB5B	0.144875	4.55003	2.23997e-05	0.00566853
sp|Q13501|SQSTM_HUMAN	SQSTM1	0.299656	4.54246	2.30271e-05	0.00570837
sp|O75663|TIPRL_HUMAN	TIPRL	-0.141788	-4.45202	3.19769e-05	0.00593033
sp|P17948-2|VGFR1-2_HUMAN	FLT1	0.260091	4.50602	2.6294e-05	0.00593033
sp|P27338-2|AOFB-2_HUMAN	MAOB	0.332962	4.45354	3.18021e-05	0.00593033
sp|P27338|AOFB_HUMAN	MAOB	0.348276	4.46632	3.03655e-05	0.00593033
sp|P27987|IP3KB_HUMAN	ITPKB	0.289543	4.47286	2.96554e-05	0.00593033
sp|P51178-2|PLCD1-2_HUMAN	PLCD1	0.380647	4.46847	3.01305e-05	0.00593033
sp|P51178|PLCD1_HUMAN	PLCD1	0.384968	4.46053	3.10079e-05	0.00593033
sp|P61601|NCALD_HUMAN	NCALD	-0.227833	-4.44991	3.22221e-05	0.00593033
sp|Q13683|ITA7_HUMAN	ITGA7	0.300384	4.51271	2.56616e-05	0.00593033
sp|Q15102|PA1B3_HUMAN	PAFAH1B3	0.236914	4.49306	2.75612e-05	0.00593033
sp|Q8IW45|NNRD_HUMAN	NAXD	0.104851	4.47136	2.98168e-05	0.00593033
sp|Q96IU4|ABHEB_HUMAN	ABHD14B	0.308126	4.48614	2.82612e-05	0.00593033
sp|Q99784|NOE1_HUMAN	OLFM1	-0.279135	-4.4754	2.93831e-05	0.00593033
tr|A0A1W2PPA3|A0A1W2PPA3_HUMAN	GFAP	0.810357	4.48004	2.88938e-05	0.00593033
tr|A0A1W2PQ25|A0A1W2PQ25_HUMAN	GFAP	0.933092	4.49654	2.72149e-05	0.00593033
tr|E7EMC7|E7EMC7_HUMAN	SQSTM1	0.337131	4.51632	2.53271e-05	0.00593033
tr|K7EPI4|K7EPI4_HUMAN	GFAP	0.798914	4.47067	2.98907e-05	0.00593033
sp|P11169|GTR3_HUMAN	SLC2A3	-0.188844	-4.43626	3.38497e-05	0.00604666
sp|P28290|ITPI2_HUMAN	ITPRID2	0.293309	4.44002	3.33939e-05	0.00604666
tr|B8ZZP4|B8ZZP4_HUMAN	SCRN1	0.123176	4.42103	3.57602e-05	0.00629535
sp|Q16537-3|2A5E-3_HUMAN	PPP2R5E	-0.137169	-4.39788	3.88645e-05	0.00664912
tr|Q5T5H1|Q5T5H1_HUMAN	ENSA	-0.149741	-4.40016	3.85478e-05	0.00664912
sp|P04216|THY1_HUMAN	THY1	-0.17896	-4.36853	4.31802e-05	0.00681181
sp|P40121|CAPG_HUMAN	CAPG	0.486489	4.38279	4.10291e-05	0.00681181
sp|P42892|ECE1_HUMAN	ECE1	0.218277	4.37491	4.22035e-05	0.00681181
sp|Q7Z6K3|PTAR1_HUMAN	PTAR1	0.160531	4.38059	4.13528e-05	0.00681181
tr|F8W131|F8W131_HUMAN	RPH3A	-0.398146	-4.37	4.29531e-05	0.00681181
tr|K4JQN1|K4JQN1_HUMAN	BAX	0.138327	4.37903	4.15855e-05	0.00681181
sp|O94887|FARP2_HUMAN	FARP2	0.176176	4.35325	4.56059e-05	0.00701234
tr|A0A3B3ISF9|A0A3B3ISF9_HUMAN	ECE1	0.208698	4.35352	4.55617e-05	0.00701234
sp|Q96SU4|OSBL9_HUMAN	OSBPL9	0.134785	4.33472	4.87258e-05	0.0073984
sp|P06748|NPM_HUMAN	NPM1	0.0991636	4.31746	5.18179e-05	0.00777076
sp|O95479|G6PE_HUMAN	H6PD	0.274333	4.30615	5.39466e-05	0.00799042
sp|P12236|ADT3_HUMAN	SLC25A6	-0.164293	-4.2994	5.5256e-05	0.00799042
sp|P52209|6PGD_HUMAN	PGD	0.193893	4.30094	5.4954e-05	0.00799042
sp|P24723|KPCL_HUMAN	PRKCH	-0.188951	-4.29131	5.68671e-05	0.00812665
sp|O75366|AVIL_HUMAN	AVIL	0.414278	4.27707	5.98122e-05	0.00825613
tr|A0A075B7B1|A0A075B7B1_HUMAN	SYNM	0.481907	4.28006	5.91821e-05	0.00825613
tr|E7EWQ4|E7EWQ4_HUMAN	DGKI	-0.140206	-4.28145	5.88919e-05	0.00825613
sp|O15061|SYNEM_HUMAN	SYNM	0.466277	4.25614	6.44132e-05	0.00859809
sp|Q13938|CAYP1_HUMAN	CAPS	0.907182	4.25636	6.43624e-05	0.00859809
sp|Q86UB9|TM135_HUMAN	TMEM135	-0.248063	-4.26203	6.30854e-05	0.00859809
sp|O76024|WFS1_HUMAN	WFS1	0.245083	4.24193	6.77278e-05	0.00860452
sp|P17302|CXA1_HUMAN	GJA1	0.357982	4.24078	6.80031e-05	0.00860452
sp|P51648|AL3A2_HUMAN	ALDH3A2	0.181968	4.24201	6.77098e-05	0.00860452
sp|Q8IV01|SYT12_HUMAN	SYT12	-0.361745	-4.24762	6.63803e-05	0.00860452
sp|Q96RT1-9|ERBIN-9_HUMAN	ERBIN	0.263442	4.24163	6.78008e-05	0.00860452
sp|P04083|ANXA1_HUMAN	ANXA1	0.750769	4.22767	7.12215e-05	0.00873867
sp|Q5KU26|COL12_HUMAN	COLEC12	0.37168	4.22778	7.11947e-05	0.00873867
tr|K7EKA8|K7EKA8_HUMAN	ADAM11	-0.17174	-4.23257	7.00021e-05	0.00873867
sp|Q9UPR0|PLCL2_HUMAN	PLCL2	-0.170253	-4.21238	7.51599e-05	0.00912968
sp|O00115|DNS2A_HUMAN	DNASE2	0.203004	4.20495	7.71502e-05	0.00920029
sp|O60861|GAS7_HUMAN	GAS7	-0.182398	-4.19361	8.02857e-05	0.00920029
sp|P10301|RRAS_HUMAN	RRAS	0.222008	4.19704	7.93227e-05	0.00920029
sp|P12235|ADT1_HUMAN	SLC25A4	-0.152727	-4.19993	7.85236e-05	0.00920029
sp|Q8IZD9|DOCK3_HUMAN	DOCK3	-0.100301	-4.19471	7.99761e-05	0.00920029
sp|Q8N129|CNPY4_HUMAN	CNPY4	0.280093	4.20435	7.73142e-05	0.00920029
sp|O15240|VGF_HUMAN	VGF	-0.452582	-4.17978	8.42738e-05	0.0093915
sp|P20702|ITAX_HUMAN	ITGAX	0.309081	4.18213	8.35828e-05	0.0093915
tr|H0YJ26|H0YJ26_HUMAN	ITGA7	0.398334	4.18032	8.41141e-05	0.0093915
sp|P16930|FAAA_HUMAN	FAH	0.301355	4.17543	8.55692e-05	0.00944917
sp|P06703|S10A6_HUMAN	S100A6	0.623952	4.16646	8.82972e-05	0.00947811
sp|Q7Z3J3|RGPD4_HUMAN	RGPD4	0.0995245	4.16858	8.76442e-05	0.00947811
sp|Q8IYB5-2|SMAP1-2_HUMAN	SMAP1	-0.13304	-4.16442	8.89292e-05	0.00947811
tr|B8ZZL6|B8ZZL6_HUMAN	CAPG	0.468068	4.16435	8.89524e-05	0.00947811
tr|A0A087WSZ2|A0A087WSZ2_HUMAN	ACTN3	-0.158923	-4.15227	9.27871e-05	0.00980074
sp|P02786|TFR1_HUMAN	TFRC	-0.206278	-4.14677	9.45849e-05	0.00989471
sp|Q13283|G3BP1_HUMAN	G3BP1	0.123735	4.13973	9.69351e-05	0.00989471
tr|A0A0A0MSM3|A0A0A0MSM3_HUMAN	UTRN	0.249092	4.14218	9.61103e-05	0.00989471
tr|H0YBC6|H0YBC6_HUMAN	DNM3	-0.166766	-4.14168	9.62794e-05	0.00989471
sp|O43719|HTSF1_HUMAN	HTATSF1	0.139975	4.12591	0.000101717	0.0100477
sp|O75891|AL1L1_HUMAN	ALDH1L1	0.240842	4.11818	0.00010449	0.0100477
sp|P21359|NF1_HUMAN	NF1	-0.104593	-4.11746	0.000104753	0.0100477
sp|P27815-7|PDE4A-7_HUMAN	PDE4A	-0.140182	-4.11512	0.000105609	0.0100477
sp|P27815|PDE4A_HUMAN	PDE4A	-0.135668	-4.13199	9.95851e-05	0.0100477
sp|P35914|HMGCL_HUMAN	HMGCL	0.132079	4.11815	0.0001045	0.0100477
sp|P49792|RBP2_HUMAN	RANBP2	0.0950238	4.12283	0.000102814	0.0100477
sp|Q15847|ADIRF_HUMAN	ADIRF	0.485585	4.11214	0.000106706	0.0100477
sp|Q9H8S9|MOB1A_HUMAN	MOB1A	0.261847	4.11632	0.000105168	0.0100477
tr|A0A0C4DGY2|A0A0C4DGY2_HUMAN	CADPS	-0.177583	-4.11244	0.000106596	0.0100477
sp|O95298|NDUC2_HUMAN	NDUFC2	-0.195783	-4.10176	0.000110622	0.0102
sp|Q96RT1|ERBIN_HUMAN	ERBIN	0.269557	4.10549	0.000109201	0.0102
sp|Q9ULH1|ASAP1_HUMAN	ASAP1	-0.121883	-4.10119	0.000110843	0.0102
sp|Q9NYL2-2|M3K20-2_HUMAN	MAP3K20	0.27722	4.09455	0.000113424	0.0102243
sp|Q9UH65|SWP70_HUMAN	SWAP70	0.171479	4.09495	0.000113269	0.0102243
tr|Q2TAM5|Q2TAM5_HUMAN	RELA	0.147989	4.09402	0.000113631	0.0102243
sp|Q8WX93|PALLD_HUMAN	PALLD	0.344619	4.08678	0.000116518	0.010407
sp|O95081|AGFG2_HUMAN	AGFG2	0.10593	4.08228	0.000118349	0.0104814
sp|O95715|CXL14_HUMAN	CXCL14	0.388495	4.08051	0.000119078	0.0104814
sp|Q93100-3|KPBB-3_HUMAN	PHKB	0.177043	4.07398	0.000121796	0.0105675
sp|Q9Y2J0|RP3A_HUMAN	RPH3A	-0.376024	-4.07469	0.000121499	0.0105675
sp|Q14571|ITPR2_HUMAN	ITPR2	0.181045	4.06951	0.000123694	0.0106561
sp|Q9UPY8|MARE3_HUMAN	MAPRE3	-0.116061	-4.06636	0.000125046	0.0106967
sp|Q8NAA5|LR75A_HUMAN	LRRC75A	-0.183044	-4.0642	0.000125985	0.0107017
sp|P40306|PSB10_HUMAN	PSMB10	0.390834	4.06006	0.000127796	0.0107058
sp|Q3SY69|AL1L2_HUMAN	ALDH1L2	0.263713	4.06029	0.000127698	0.0107058
tr|K7ELP4|K7ELP4_HUMAN	GFAP	0.704462	4.05752	0.000128922	0.0107261
sp|P11177|ODPB_HUMAN	PDHB	-0.148448	-4.05048	0.000132089	0.0107845
sp|Q9BW83|IFT27_HUMAN	IFT27	0.155235	4.05005	0.000132287	0.0107845
sp|Q9UPY8-2|MARE3-2_HUMAN	MAPRE3	-0.107623	-4.05196	0.000131421	0.0107845
sp|Q9UPV7|PHF24_HUMAN	PHF24	-0.172823	-4.04045	0.000136735	0.0110728
sp|Q14956|GPNMB_HUMAN	GPNMB	0.591859	4.0341	0.000139756	0.0112425
sp|O14829|PPE1_HUMAN	PPEF1	-0.280688	-4.02482	0.00014429	0.0114277
sp|O15391|TYY2_HUMAN	YY2	0.214538	4.02323	0.000145077	0.0114277
tr|F8W1U3|F8W1U3_HUMAN	KRT8	0.81787	4.02689	0.000143266	0.0114277
tr|J3QKK9|J3QKK9_HUMAN	ALDH3A2	0.203932	4.02174	0.000145822	0.0114277
sp|O75078|ADA11_HUMAN	ADAM11	-0.161469	-4.01385	0.000149826	0.0114515
sp|O75912|DGKI_HUMAN	DGKI	-0.14468	-4.01885	0.000147279	0.0114515
sp|P17931|LEG3_HUMAN	LGALS3	0.296463	4.01371	0.000149896	0.0114515
sp|Q9Y4J8|DTNA_HUMAN	DTNA	0.241453	4.0166	0.00014842	0.0114515
sp|P05787|K2C8_HUMAN	KRT8	0.733238	4.00571	0.000154069	0.0116749
sp|Q8NFJ9-3|BBS1-3_HUMAN	BBS1	0.181285	4.00444	0.000154743	0.0116749
sp|Q96JI7|SPTCS_HUMAN	SPG11	0.0987481	4.00103	0.000156558	0.0117389
sp|O43169|CYB5B_HUMAN	CYB5B	0.1386	3.99389	0.000160432	0.0118962
sp|P14136-2|GFAP-2_HUMAN	GFAP	0.685416	3.98488	0.000165452	0.0118962
sp|P14136|GFAP_HUMAN	GFAP	0.695427	3.99008	0.000162537	0.0118962
sp|P21359-2|NF1-2_HUMAN	NF1	-0.101085	-3.98694	0.000164295	0.0118962
sp|P98196|AT11A_HUMAN	ATP11A	0.144024	3.98478	0.000165511	0.0118962
tr|A0A1W2PR46|A0A1W2PR46_HUMAN	GFAP	0.69126	3.99313	0.000160849	0.0118962
tr|H0YKB1|H0YKB1_HUMAN	TJP1	0.159536	3.98805	0.000163668	0.0118962
sp|Q8N283|ANR35_HUMAN	ANKRD35	0.18667	3.98291	0.000166573	0.0119021
sp|P19022|CADH2_HUMAN	CDH2	0.114883	3.98088	0.000167733	0.0119149
sp|Q03113|GNA12_HUMAN	GNA12	0.187034	3.97831	0.000169212	0.0119237
sp|Q9NQ86|TRI36_HUMAN	TRIM36	-0.185189	-3.97557	0.000170802	0.0119237
tr|A0A1W2PRT3|A0A1W2PRT3_HUMAN	GFAP	0.694138	3.97572	0.000170711	0.0119237
sp|Q96HC4|PDLI5_HUMAN	PDLIM5	0.253297	3.97049	0.000173787	0.0120628
sp|P05556|ITB1_HUMAN	ITGB1	0.298616	3.96807	0.000175229	0.0120938
sp|P41219|PERI_HUMAN	PRPH	0.513718	3.9611	0.000179441	0.0122764
sp|P60880|SNP25_HUMAN	SNAP25	-0.147356	-3.95901	0.000180721	0.0122764
sp|Q9ULA0|DNPEP_HUMAN	DNPEP	0.168625	3.95871	0.000180906	0.0122764
sp|Q9Y4J8-13|DTNA-13_HUMAN	DTNA	0.232501	3.95397	0.000183852	0.0123411
tr|H0YKN4|H0YKN4_HUMAN	ANXA2	0.522297	3.95391	0.000183892	0.0123411
sp|O43920|NDUS5_HUMAN	NDUFS5	-0.162655	-3.93991	0.000192855	0.0127848
sp|P49674|KC1E_HUMAN	CSNK1E	0.109941	3.93868	0.000193661	0.0127848
sp|Q4KMQ2|ANO6_HUMAN	ANO6	0.36157	3.93896	0.000193477	0.0127848
sp|P0DJD0|RGPD1_HUMAN	RGPD1	0.0986651	3.90433	0.00021757	0.0135347
sp|P16144-5|ITB4-5_HUMAN	ITGB4	0.293447	3.91479	0.000210004	0.0135347
sp|P21246|PTN_HUMAN	PTN	0.466261	3.91586	0.000209245	0.0135347
sp|P24298|ALAT1_HUMAN	GPT	0.256148	3.90949	0.000213807	0.0135347
sp|P48681|NEST_HUMAN	NES	0.351199	3.91857	0.000207333	0.0135347
sp|P78347|GTF2I_HUMAN	GTF2I	0.137064	3.90717	0.000215494	0.0135347
sp|Q15149-3|PLEC-3_HUMAN	PLEC	0.278544	3.91009	0.000213374	0.0135347
sp|Q15149-8|PLEC-8_HUMAN	PLEC	0.278878	3.91283	0.000211406	0.0135347
sp|Q8TCE6|FA45A_HUMAN	FAM45A	0.120096	3.91068	0.000212949	0.0135347
sp|Q9P0Z9|SOX_HUMAN	PIPOX	0.276407	3.90171	0.000219506	0.0135347
sp|Q9P1Z2|CACO1_HUMAN	CALCOCO1	-0.122708	-3.90784	0.000215003	0.0135347
tr|E9PDI2|E9PDI2_HUMAN	CAP2	-0.153139	-3.902	0.000219291	0.0135347
tr|H7C310|H7C310_HUMAN	2023-09-02	0.200426	3.90496	0.00021711	0.0135347
sp|Q9UJY1|HSPB8_HUMAN	HSPB8	0.412718	3.89766	0.00022253	0.0136519
sp|Q15149|PLEC_HUMAN	PLEC	0.277588	3.89517	0.000224409	0.0136759
sp|Q9Y4J8-11|DTNA-11_HUMAN	DTNA	0.246626	3.89417	0.000225173	0.0136759
sp|A0A0K0K1G8|TVBJ2_HUMAN	TRBV10-2	0.538696	3.88762	0.000230203	0.013843
sp|Q9HCP6|HHATL_HUMAN	HHATL	0.242296	3.88847	0.000229543	0.013843
sp|Q15274|NADC_HUMAN	QPRT	0.277519	3.88532	0.000231997	0.0138821
sp|Q09666|AHNK_HUMAN	AHNAK	0.409501	3.8814	0.000235086	0.013998
sp|Q96PB7|NOE3_HUMAN	OLFM3	-0.31016	-3.87926	0.000236786	0.0140304
sp|Q6YHK3|CD109_HUMAN	CD109	0.333724	3.87643	0.000239056	0.0140962
sp|Q8IYB5|SMAP1_HUMAN	SMAP1	-0.123338	-3.86715	0.000246639	0.0144035
tr|H0YDN1|H0YDN1_HUMAN	PLEC	0.269439	3.86823	0.000245746	0.0144035
sp|O75396|SC22B_HUMAN	SEC22B	0.0858458	3.86363	0.00024957	0.0144139
sp|P15056|BRAF_HUMAN	BRAF	-0.101097	-3.86469	0.00024869	0.0144139
sp|P48730|KC1D_HUMAN	CSNK1D	0.116361	3.86267	0.000250378	0.0144139
cu|P02649-103|APOE4_HUMAN	APOE	0.339352	3.85731	0.000254936	0.0144496
sp|P15259|PGAM2_HUMAN	PGAM2	0.174213	3.85635	0.000255756	0.0144496
sp|P48730-2|KC1D-2_HUMAN	CSNK1D	0.11739	3.85854	0.000253884	0.0144496
sp|Q96I99|SUCB2_HUMAN	SUCLG2	0.246329	3.85863	0.000253807	0.0144496
sp|Q14184|DOC2B_HUMAN	DOC2B	-0.28923	-3.85306	0.000258592	0.0145422
tr|F5H2F4|F5H2F4_HUMAN	MTHFD1	0.124465	3.85165	0.00025982	0.0145439
sp|Q9NRN5|OLFL3_HUMAN	OLFML3	0.647895	3.84707	0.000263847	0.0147016
sp|Q12797|ASPH_HUMAN	ASPH	0.174328	3.84427	0.000266332	0.0147249
sp|Q9BQS8|FYCO1_HUMAN	FYCO1	0.170536	3.84303	0.000267445	0.0147249
sp|Q9UGI6|KCNN3_HUMAN	KCNN3	0.2885	3.84252	0.000267902	0.0147249
sp|P26038|MOES_HUMAN	MSN	0.312565	3.83977	0.000270382	0.0147943
sp|O75116|ROCK2_HUMAN	ROCK2	-0.088413	-3.8377	0.000272264	0.0148305
sp|P17948|VGFR1_HUMAN	FLT1	0.210629	3.83534	0.000274427	0.0148815
sp|P12004|PCNA_HUMAN	PCNA	0.215753	3.82802	0.000281229	0.0151363
sp|P27361|MK03_HUMAN	MAPK3	0.176278	3.82498	0.000284109	0.0151363
sp|P48552|NRIP1_HUMAN	NRIP1	0.60133	3.82548	0.000283629	0.0151363
sp|Q567U6|CCD93_HUMAN	CCDC93	0.0993706	3.82745	0.000281769	0.0151363
sp|P30536|TSPO_HUMAN	TSPO	0.300545	3.82149	0.000287434	0.0152426
sp|Q13576|IQGA2_HUMAN	IQGAP2	0.262048	3.82027	0.000288614	0.0152426
sp|O43148|MCES_HUMAN	RNMT	-0.146868	-3.81645	0.000292317	0.0153051
sp|Q53EL6|PDCD4_HUMAN	PDCD4	0.164485	3.81717	0.000291621	0.0153051
cu|P02649-101|APOE2_HUMAN	APOE	0.334974	3.798	0.00031087	0.0153145
sp|Q14974|IMB1_HUMAN	KPNB1	0.0834565	3.80314	0.000305597	0.0153145
sp|Q5T7N3|KANK4_HUMAN	KANK4	0.245818	3.79917	0.00030966	0.0153145
sp|Q68CJ6|SLIP_HUMAN	NUGGC	0.27663	3.8048	0.00030391	0.0153145
sp|Q68DK2|ZFY26_HUMAN	ZFYVE26	0.121896	3.80584	0.000302855	0.0153145
sp|Q96G03|PGM2_HUMAN	PGM2	0.225024	3.81419	0.000294533	0.0153145
sp|Q96LD4|TRI47_HUMAN	TRIM47	0.230294	3.80769	0.000300988	0.0153145
sp|Q96TA1|NIBL1_HUMAN	FAM129B	0.201075	3.80027	0.000308527	0.0153145
sp|Q9BXC9|BBS2_HUMAN	BBS2	0.141113	3.79748	0.000311409	0.0153145
sp|Q9HCB6|SPON1_HUMAN	SPON1	0.173899	3.80271	0.000306028	0.0153145
tr|F5GWQ2|F5GWQ2_HUMAN	ARAP1	0.222205	3.80134	0.000307427	0.0153145
tr|H0YA05|H0YA05_HUMAN	PALLD	0.345638	3.80045	0.000308342	0.0153145
tr|H0YI08|H0YI08_HUMAN	MRVI1	0.259285	3.8031	0.000305639	0.0153145
tr|I3L170|I3L170_HUMAN	MAPT	0.194946	3.80047	0.000308326	0.0153145
tr|Q8IWY7|Q8IWY7_HUMAN	TTBK2	0.683761	3.79776	0.000311125	0.0153145
sp|P50479|PDLI4_HUMAN	PDLIM4	0.342431	3.78851	0.000320853	0.0156738
sp|Q6U841-2|S4A10-2_HUMAN	SLC4A10	-0.259798	-3.78809	0.000321296	0.0156738
sp|Q9Y5Z4|HEBP2_HUMAN	HEBP2	0.253643	3.78464	0.000324998	0.015791
sp|Q15173|2A5B_HUMAN	PPP2R5B	-0.144951	-3.78014	0.0003299	0.0159653
sp|P98172|EFNB1_HUMAN	EFNB1	0.212013	3.77806	0.000332188	0.0160123
sp|O60885|BRD4_HUMAN	BRD4	0.10352	3.77552	0.000334996	0.0160257
sp|P10620|MGST1_HUMAN	MGST1	0.358393	3.77542	0.000335106	0.0160257
sp|Q99666|RGPD5_HUMAN	RGPD5	0.0964962	3.77033	0.000340824	0.0162353
sp|P11586|C1TC_HUMAN	MTHFD1	0.129924	3.76603	0.00034571	0.0163398
sp|Q9Y4J8-10|DTNA-10_HUMAN	DTNA	0.271459	3.76693	0.000344688	0.0163398
sp|P16144-3|ITB4-3_HUMAN	ITGB4	0.30937	3.76485	0.000347073	0.0163407
sp|O60941-3|DTNB-3_HUMAN	DTNB	0.162008	3.76367	0.000348433	0.0163414
sp|P17655|CAN2_HUMAN	CAPN2	0.251198	3.7603	0.000352343	0.0163981
sp|Q08043|ACTN3_HUMAN	ACTN3	-0.13557	-3.76065	0.00035193	0.0163981
sp|O95817|BAG3_HUMAN	BAG3	0.31873	3.75787	0.000355186	0.0164673
sp|P10636-3|TAU-3_HUMAN	MAPT	0.192872	3.75272	0.000361297	0.0166388
tr|F5GYV5|F5GYV5_HUMAN	ARL6IP4	0.169468	3.75245	0.000361623	0.0166388
sp|P02649|APOE_HUMAN	APOE	0.324846	3.74871	0.000366123	0.0167268
sp|P42263|GRIA3_HUMAN	GRIA3	-0.189816	-3.74746	0.000367639	0.0167268
sp|Q14315|FLNC_HUMAN	FLNC	0.498701	3.74743	0.000367667	0.0167268
sp|Q05084|ICA69_HUMAN	ICA1	-0.132731	-3.74437	0.000371411	0.0168341
sp|Q8N8N7|PTGR2_HUMAN	PTGR2	0.245271	3.7422	0.000374087	0.0168923
sp|O00451|GFRA2_HUMAN	GFRA2	-0.279911	-3.73084	0.000388371	0.0169206
sp|O75197|LRP5_HUMAN	LRP5	0.243364	3.73073	0.000388512	0.0169206
sp|P04406|G3P_HUMAN	GAPDH	0.0851317	3.7291	0.000390607	0.0169206
sp|P07948|LYN_HUMAN	LYN	0.154974	3.73895	0.000378116	0.0169206
sp|P25445|TNR6_HUMAN	FAS	0.491058	3.73067	0.000388598	0.0169206
sp|P29120|NEC1_HUMAN	PCSK1	-0.329557	-3.72303	0.000398506	0.0169206
sp|P35612|ADDB_HUMAN	ADD2	-0.110299	-3.72374	0.000397567	0.0169206
sp|P51692|STA5B_HUMAN	STAT5B	0.12521	3.73618	0.000381598	0.0169206
sp|Q12797-10|ASPH-10_HUMAN	ASPH	0.167614	3.72205	0.000399786	0.0169206
sp|Q6EMK4|VASN_HUMAN	VASN	0.212375	3.72806	0.000391952	0.0169206
sp|Q6QEF8-5|CORO6-5_HUMAN	CORO6	-0.140741	-3.72542	0.000395381	0.0169206
sp|Q8N3E9|PLCD3_HUMAN	PLCD3	0.223147	3.73195	0.000386954	0.0169206
sp|Q92692|NECT2_HUMAN	NECTIN2	0.174436	3.72699	0.000393338	0.0169206
sp|Q93097-2|WNT2B-2_HUMAN	WNT2B	0.362096	3.7355	0.000382456	0.0169206
sp|Q93100|KPBB_HUMAN	PHKB	0.164182	3.72548	0.0003953	0.0169206
sp|Q9UJF2-2|NGAP-2_HUMAN	RASAL2	-0.123027	-3.72982	0.000389683	0.0169206
sp|Q9Y4J8-12|DTNA-12_HUMAN	DTNA	0.188294	3.72411	0.00039709	0.0169206
tr|Q5TBG4|Q5TBG4_HUMAN	NEK6	0.321742	3.73885	0.000378242	0.0169206
sp|O95299|NDUAA_HUMAN	NDUFA10	-0.173087	-3.72034	0.000402049	0.0169572
sp|P09038|FGF2_HUMAN	FGF2	0.232364	3.71691	0.000406611	0.0170903
sp|Q6NYC8|PPR18_HUMAN	PPP1R18	0.139375	3.70999	0.000415973	0.0173456
sp|Q8WU79|SMAP2_HUMAN	SMAP2	-0.119935	-3.70921	0.000417045	0.0173456
sp|Q9UPY5|XCT_HUMAN	SLC7A11	0.24954	3.70823	0.000418396	0.0173456
tr|K7EK18|K7EK18_HUMAN	2023-09-09	0.144059	3.70826	0.000418343	0.0173456
sp|P16144-2|ITB4-2_HUMAN	ITGB4	0.303937	3.70329	0.000425232	0.0174503
sp|Q13418|ILK_HUMAN	ILK	0.227479	3.70379	0.000424537	0.0174503
tr|B4DIP2|B4DIP2_HUMAN	ERBIN	0.27911	3.70434	0.000423779	0.0174503
sp|Q6U841|S4A10_HUMAN	SLC4A10	-0.250852	-3.69986	0.000430047	0.0175885
tr|K7EKD1|K7EKD1_HUMAN	GFAP	0.715148	3.69833	0.000432224	0.0176182
sp|Q06323|PSME1_HUMAN	PSME1	0.180344	3.6938	0.000438686	0.0177327
sp|Q8IYK4|GT252_HUMAN	COLGALT2	0.170448	3.6931	0.000439692	0.0177327
sp|Q96SB4|SRPK1_HUMAN	SRPK1	-0.102473	-3.69229	0.000440873	0.0177327
sp|Q9BQ69|MACD1_HUMAN	MACROD1	0.169141	3.69371	0.000438814	0.0177327
sp|P04049|RAF1_HUMAN	RAF1	-0.0622235	-3.6894	0.00044506	0.0177784
sp|Q8NHH9-2|ATLA2-2_HUMAN	ATL2	-0.117445	-3.68849	0.000446398	0.0177784
sp|Q96FJ0|STALP_HUMAN	STAMBPL1	-0.105226	-3.69049	0.000443474	0.0177784
sp|P19256|LFA3_HUMAN	CD58	0.248864	3.68705	0.000448509	0.0178041
sp|O00443|P3C2A_HUMAN	PIK3C2A	0.115871	3.67972	0.000459392	0.017847
sp|O75153|CLU_HUMAN	CLUH	-0.0707161	-3.67649	0.000464284	0.017847
sp|P07948-2|LYN-2_HUMAN	LYN	0.148796	3.67671	0.000463949	0.017847
sp|P60880-2|SNP25-2_HUMAN	SNAP25	-0.117171	-3.67951	0.000459712	0.017847
sp|Q5VWP3-3|MLIP-3_HUMAN	MLIP	-0.232954	-3.68353	0.000453711	0.017847
sp|Q6P1M0|S27A4_HUMAN	SLC27A4	-0.0782424	-3.68143	0.000456836	0.017847
sp|Q8NHH9|ATLA2_HUMAN	ATL2	-0.113901	-3.68205	0.000455907	0.017847
sp|Q9BQI5|SGIP1_HUMAN	SGIP1	-0.134378	-3.67886	0.000460686	0.017847
tr|C9JQJ4|C9JQJ4_HUMAN	2023-09-02	0.204171	3.6832	0.000454197	0.017847
tr|E7ENI6|E7ENI6_HUMAN	ICA1	-0.148369	-3.677	0.000463505	0.017847
sp|O43896|KIF1C_HUMAN	KIF1C	0.0976005	3.67392	0.000468197	0.0178842
sp|Q15819|UB2V2_HUMAN	UBE2V2	-0.0578666	-3.67447	0.000467363	0.0178842
sp|Q04206|TF65_HUMAN	RELA	0.137514	3.67218	0.000470871	0.01793
sp|Q16799|RTN1_HUMAN	RTN1	-0.0980455	-3.66593	0.000480586	0.0182428
sp|Q14160-3|SCRIB-3_HUMAN	SCRIB	0.130299	3.6637	0.000484092	0.0182727
sp|Q6ZS30|NBEL1_HUMAN	NBEAL1	0.192623	3.66257	0.000485887	0.0182727
tr|A0A2R8Y8E0|A0A2R8Y8E0_HUMAN	BRAF	-0.0988603	-3.66349	0.000484424	0.0182727
sp|P50440|GATM_HUMAN	GATM	0.203391	3.65891	0.000491729	0.0184211
sp|Q8IY33|MILK2_HUMAN	MICALL2	0.149308	3.6582	0.000492866	0.0184211
sp|P40123|CAP2_HUMAN	CAP2	-0.130619	-3.65715	0.000494556	0.0184275
sp|P35221|CTNA1_HUMAN	CTNNA1	0.160572	3.65618	0.000496114	0.018429
tr|H0YAW7|H0YAW7_HUMAN	EPHX2	0.373088	3.64922	0.000507505	0.0187376
tr|H7C3M7|H7C3M7_HUMAN	FARP2	0.240404	3.64935	0.000507279	0.0187376
sp|P50440-2|GATM-2_HUMAN	GATM	0.202053	3.64537	0.000513906	0.0188593
sp|Q92828|COR2A_HUMAN	CORO2A	-0.142677	-3.64624	0.000512447	0.0188593
sp|P16144|ITB4_HUMAN	ITGB4	0.299375	3.64047	0.00052216	0.0189927
sp|Q96BJ3|AIDA_HUMAN	AIDA	0.108357	3.64188	0.000519767	0.0189927
tr|E5RFU2|E5RFU2_HUMAN	EPHX2	0.348795	3.64043	0.000522233	0.0189927
sp|P06756|ITAV_HUMAN	ITGAV	0.101659	3.63163	0.000537388	0.0191242
sp|P28065|PSB9_HUMAN	PSMB9	0.309569	3.63479	0.000531892	0.0191242
sp|P30626|SORCN_HUMAN	SRI	0.162356	3.63276	0.000535416	0.0191242
sp|P99999|CYC_HUMAN	CYCS	-0.163562	-3.63684	0.000528368	0.0191242
sp|Q9UJF2|NGAP_HUMAN	RASAL2	-0.120101	-3.6302	0.000539881	0.0191242
sp|Q9UL46|PSME2_HUMAN	PSME2	0.172472	3.63013	0.00054002	0.0191242
sp|Q9ULK4|MED23_HUMAN	MED23	0.159508	3.63087	0.000538715	0.0191242
tr|C9IY94|C9IY94_HUMAN	2023-09-02	0.197759	3.63154	0.000537544	0.0191242
tr|H0YNP5|H0YNP5_HUMAN	ANXA2	0.542535	3.63042	0.000539499	0.0191242
sp|P42229|STA5A_HUMAN	STAT5A	0.129352	3.62623	0.000546884	0.0193111
sp|Q2M2I8|AAK1_HUMAN	AAK1	-0.133931	-3.62276	0.00055308	0.0194732
sp|O00192|ARVC_HUMAN	ARVCF	0.174504	3.61872	0.000560377	0.019504
sp|P42658-2|DPP6-2_HUMAN	DPP6	-0.194194	-3.61956	0.000558863	0.019504
sp|P61328|FGF12_HUMAN	FGF12	-0.163551	-3.62072	0.000556756	0.019504
sp|Q9HB07|MYG1_HUMAN	C12orf10	0.145061	3.61972	0.00055857	0.019504
sp|O00330|ODPX_HUMAN	PDHX	-0.143883	-3.61586	0.000565595	0.0196294
sp|P34913|HYES_HUMAN	EPHX2	0.352695	3.61131	0.000573993	0.0198077
sp|Q6QNY0|BL1S3_HUMAN	BLOC1S3	0.129983	3.61216	0.000572425	0.0198077
sp|P07741|APT_HUMAN	APRT	0.268325	3.60929	0.000577767	0.0198213
sp|Q5EBL8|PDZ11_HUMAN	PDZD11	0.175143	3.60903	0.000578239	0.0198213
sp|Q9H3N1|TMX1_HUMAN	TMX1	0.170267	3.60761	0.000580917	0.0198213
tr|E9PQS6|E9PQS6_HUMAN	RELA	0.138607	3.60819	0.000579831	0.0198213
sp|Q13615|MTMR3_HUMAN	MTMR3	0.103797	3.60409	0.000587562	0.0199919
sp|O43674|NDUB5_HUMAN	NDUFB5	-0.177713	-3.60267	0.000590278	0.0200282
sp|Q16537|2A5E_HUMAN	PPP2R5E	-0.104091	-3.60155	0.000592407	0.0200445
sp|Q7Z3B1|NEGR1_HUMAN	NEGR1	-0.162411	-3.6005	0.000594419	0.0200567
sp|Q9BTV4|TMM43_HUMAN	TMEM43	0.149608	3.59674	0.000601688	0.0202457
tr|Q5VZU9|Q5VZU9_HUMAN	TPP2	-0.106292	-3.59449	0.000606075	0.020337
sp|Q9UFW8|CGBP1_HUMAN	CGGBP1	0.161793	3.59277	0.000609456	0.0203941
sp|P16070-10|CD44-10_HUMAN	CD44	0.64954	3.58977	0.000615386	0.0204594
sp|P16070|CD44_HUMAN	CD44	0.64954	3.58977	0.000615386	0.0204594
sp|Q6IQ49-3|SDE2-3_HUMAN	SDE2	0.208324	3.58923	0.000616459	0.0204594
tr|H7BYH4|H7BYH4_HUMAN	SOD1	0.137043	3.58439	0.000626163	0.0207248
sp|Q96DU7|IP3KC_HUMAN	ITPKC	0.246616	3.5823	0.000630388	0.0208079
sp|O43933|PEX1_HUMAN	PEX1	0.0980418	3.58123	0.000632571	0.0208234
sp|Q12923|PTN13_HUMAN	PTPN13	0.124044	3.57761	0.000639987	0.02087
sp|Q2Y0W8|S4A8_HUMAN	SLC4A8	-0.209467	-3.57719	0.000640859	0.02087
sp|Q6FI81|CPIN1_HUMAN	CIAPIN1	-0.109433	-3.57956	0.000635973	0.02087
sp|Q9Y6N8|CAD10_HUMAN	CDH10	-0.156173	-3.5778	0.000639593	0.02087
sp|Q9UJ70|NAGK_HUMAN	NAGK	0.125025	3.5745	0.000646422	0.0209949
sp|P10636|TAU_HUMAN	MAPT	0.148742	3.57358	0.000648357	0.0210016
sp|Q8IZD0|SAM14_HUMAN	SAMD14	-0.161799	-3.57139	0.000652936	0.0210377
sp|Q9Y285|SYFA_HUMAN	FARSA	-0.15891	-3.57146	0.000652784	0.0210377
sp|O15031|PLXB2_HUMAN	PLXNB2	0.177944	3.56473	0.000667078	0.0213799
tr|H0Y307|H0Y307_HUMAN	KIF13A	0.139664	3.56541	0.00066561	0.0213799
sp|P35609-2|ACTN2-2_HUMAN	ACTN2	-0.232029	-3.56354	0.000669635	0.0214054
sp|Q99624|S38A3_HUMAN	SLC38A3	0.196719	3.56101	0.000675095	0.0215233
sp|Q9HC98|NEK6_HUMAN	NEK6	0.264748	3.55891	0.000679665	0.0216123
tr|C9JBG0|C9JBG0_HUMAN	RAB34	0.21811	3.55674	0.000684413	0.0217064
sp|Q9BZV1|UBXN6_HUMAN	UBXN6	-0.0873591	-3.55404	0.000690368	0.0218383
sp|P48061|SDF1_HUMAN	CXCL12	0.466251	3.55242	0.000693962	0.021895
sp|P58107|EPIPL_HUMAN	EPPK1	0.214853	3.54982	0.000699782	0.0219645
sp|Q13228|SBP1_HUMAN	SELENBP1	0.282698	3.54999	0.000699401	0.0219645
sp|Q16718|NDUA5_HUMAN	NDUFA5	-0.134048	-3.54856	0.000702601	0.0219961
sp|O60741|HCN1_HUMAN	HCN1	-0.177651	-3.5459	0.000708618	0.0220938
sp|P35249|RFC4_HUMAN	RFC4	0.135502	3.54558	0.00070936	0.0220938
sp|O60941|DTNB_HUMAN	DTNB	0.154412	3.54007	0.000721979	0.0223344
sp|O75874|IDHC_HUMAN	IDH1	0.165603	3.5411	0.000719613	0.0223344
sp|Q96T17|MA7D2_HUMAN	MAP7D2	-0.145097	-3.53901	0.00072444	0.0223344
tr|H7BXZ5|H7BXZ5_HUMAN	KALRN	-0.0974797	-3.53925	0.000723869	0.0223344
sp|P42658|DPP6_HUMAN	DPP6	-0.188347	-3.5364	0.000730502	0.0224386
sp|Q2TBA0|KLH40_HUMAN	KLHL40	0.553475	3.53597	0.000731511	0.0224386
sp|Q96JJ7|TMX3_HUMAN	TMX3	-0.113728	-3.53482	0.000734201	0.0224416
sp|Q9Y2K9|STB5L_HUMAN	STXBP5L	-0.124289	-3.53435	0.000735307	0.0224416
sp|O15488|GLYG2_HUMAN	GYG2	0.401902	3.52775	0.000750984	0.022524
sp|P51570-2|GALK1-2_HUMAN	GALK1	0.190537	3.52935	0.000747168	0.022524
sp|Q08499-10|PDE4D-10_HUMAN	PDE4D	-0.141719	-3.5294	0.000747054	0.022524
sp|Q13951|PEBB_HUMAN	CBFB	0.195971	3.52883	0.000748407	0.022524
sp|Q5TDH0|DDI2_HUMAN	DDI2	-0.108469	-3.52828	0.000749724	0.022524
tr|A0A2R8YFJ7|A0A2R8YFJ7_HUMAN	SPG7	-0.121007	-3.5309	0.000743472	0.022524
tr|K7EIN1|K7EIN1_HUMAN	WBP2	-0.154668	-3.53152	0.000741998	0.022524
sp|Q15427|SF3B4_HUMAN	SF3B4	0.188366	3.52685	0.000753145	0.0225331
sp|Q9Y6G9|DC1L1_HUMAN	DYNC1LI1	-0.0871427	-3.52599	0.00075522	0.0225397
sp|Q53T59|H1BP3_HUMAN	HS1BP3	0.126716	3.52427	0.000759386	0.0226085
sp|A6NHX0|CAST2_HUMAN	CASTOR2	-0.132987	-3.51881	0.000772731	0.0228579
sp|Q14CZ8-2|HECAM-2_HUMAN	HEPACAM	0.241588	3.51567	0.000780523	0.0228579
sp|Q15019|SEPT2_HUMAN	2023-09-02	0.179074	3.51849	0.000773527	0.0228579
sp|Q16644|MAPK3_HUMAN	MAPKAPK3	0.185794	3.5155	0.000780935	0.0228579
sp|Q86VH5|LRRT3_HUMAN	LRRTM3	-0.143794	-3.51775	0.000775347	0.0228579
sp|Q92692-2|NECT2-2_HUMAN	NECTIN2	0.174129	3.51716	0.000776808	0.0228579
sp|Q96BJ3-3|AIDA-3_HUMAN	AIDA	0.125124	3.51558	0.000780739	0.0228579
sp|P00568|KAD1_HUMAN	AK1	0.233669	3.51092	0.000792412	0.0230885
sp|Q00325|MPCP_HUMAN	SLC25A3	-0.125233	-3.51084	0.000792616	0.0230885
sp|P47972|NPTX2_HUMAN	NPTX2	-0.470574	-3.50904	0.000797193	0.023111
sp|Q9Y3Z3|SAMH1_HUMAN	SAMHD1	0.171256	3.50926	0.00079663	0.023111
sp|Q6QEF8|CORO6_HUMAN	CORO6	-0.139763	-3.5063	0.000804176	0.0232579
sp|Q9Y697|NFS1_HUMAN	NFS1	-0.135451	-3.50534	0.000806628	0.0232734
sp|Q13136|LIPA1_HUMAN	PPFIA1	0.0534537	3.50448	0.000808832	0.0232751
sp|Q8N5H7|SH2D3_HUMAN	SH2D3C	-0.0915065	-3.50383	0.000810517	0.0232751
sp|Q99683|M3K5_HUMAN	MAP3K5	0.105207	3.50076	0.000818463	0.0234413
sp|Q9ULZ3|ASC_HUMAN	PYCARD	0.249568	3.50011	0.000820166	0.0234413
sp|P28062|PSB8_HUMAN	PSMB8	0.186398	3.49936	0.000822118	0.0234419
sp|P07355|ANXA2_HUMAN	ANXA2	0.531023	3.49855	0.000824251	0.0234477
tr|A0A0G2JS76|A0A0G2JS76_HUMAN	MAPT	0.152064	3.49742	0.000827211	0.023477
sp|Q14849|STAR3_HUMAN	STARD3	0.152983	3.49527	0.000832878	0.0235529
sp|Q8N3V7-2|SYNPO-2_HUMAN	SYNPO	-0.229963	-3.49494	0.000833764	0.0235529
sp|P23193|TCEA1_HUMAN	TCEA1	0.14083	3.49308	0.000838701	0.0235898
sp|Q8NEL9-4|DDHD1-4_HUMAN	DDHD1	-0.111022	-3.49298	0.000838955	0.0235898
sp|Q09028|RBBP4_HUMAN	RBBP4	0.107523	3.49221	0.000841012	0.023593
sp|P50607|TUB_HUMAN	TUB	0.111617	3.49033	0.000846061	0.02368
sp|Q5VTR2|BRE1A_HUMAN	RNF20	0.0843961	3.48752	0.000853624	0.0238367
sp|P35609|ACTN2_HUMAN	ACTN2	-0.228169	-3.47998	0.000874304	0.0243582
sp|P30041|PRDX6_HUMAN	PRDX6	0.299884	3.47699	0.000882619	0.0244218
sp|P33241|LSP1_HUMAN	LSP1	0.363426	3.47716	0.000882137	0.0244218
tr|A0A0G2JPR0|A0A0G2JPR0_HUMAN	C4A	0.395972	3.47819	0.000879265	0.0244218
sp|P00966|ASSY_HUMAN	ASS1	0.258613	3.47523	0.000887554	0.024447
sp|P51570|GALK1_HUMAN	GALK1	0.188126	3.47535	0.000887217	0.024447
sp|Q9UHI5|LAT2_HUMAN	SLC7A8	-0.185611	-3.47421	0.000890437	0.0244709
sp|Q15020-2|SART3-2_HUMAN	SART3	0.102789	3.46795	0.000908232	0.0249036
sp|O43157|PLXB1_HUMAN	PLXNB1	0.178011	3.46699	0.000911014	0.0249236
sp|Q12860|CNTN1_HUMAN	CNTN1	-0.0884696	-3.46244	0.000924204	0.0250339
sp|Q7Z6J0|SH3R1_HUMAN	SH3RF1	-0.107596	-3.46254	0.000923928	0.0250339
sp|Q8WXF0|SRS12_HUMAN	SRSF12	0.132738	3.46213	0.000925115	0.0250339
sp|Q9BQJ4|TMM47_HUMAN	TMEM47	0.33929	3.46205	0.000925349	0.0250339
tr|F6UJY1|F6UJY1_HUMAN	HYI	0.252064	3.46456	0.000918033	0.0250339
sp|Q86Y39|NDUAB_HUMAN	NDUFA11	-0.17159	-3.46112	0.000928068	0.0250517
tr|G3V1M7|G3V1M7_HUMAN	ACADVL	0.172003	3.45999	0.000931393	0.0250857
sp|Q86W92-2|LIPB1-2_HUMAN	PPFIBP1	0.142017	3.45255	0.000953538	0.0254676
sp|Q96GY0|ZC21A_HUMAN	ZC2HC1A	-0.210376	-3.45244	0.000953845	0.0254676
sp|Q9BY43|CHM4A_HUMAN	CHMP4A	0.193976	3.45241	0.000953959	0.0254676
sp|Q9HB90|RRAGC_HUMAN	RRAGC	0.104862	3.45249	0.000953721	0.0254676
sp|O94905|ERLN2_HUMAN	ERLIN2	0.240658	3.4507	0.000959105	0.0255488
sp|O14775|GNB5_HUMAN	GNB5	-0.144095	-3.44703	0.00097026	0.0257677
tr|H0YCI3|H0YCI3_HUMAN	YAP1	0.312728	3.44661	0.000971564	0.0257677
sp|P12270|TPR_HUMAN	TPR	0.0839338	3.4451	0.000976187	0.0258339
sp|Q08499-11|PDE4D-11_HUMAN	PDE4D	-0.142861	-3.44287	0.000983066	0.0259594
tr|H0Y905|H0Y905_HUMAN	RAPGEF2	-0.120785	-3.44211	0.000985415	0.0259649
sp|P05230|FGF1_HUMAN	FGF1	0.327092	3.43877	0.000995837	0.0260004
sp|P10636-2|TAU-2_HUMAN	MAPT	0.139772	3.43954	0.000993441	0.0260004
sp|Q14160|SCRIB_HUMAN	SCRIB	0.123232	3.43938	0.000993923	0.0260004
sp|Q9NQC3|RTN4_HUMAN	RTN4	-0.109624	-3.43759	0.000999557	0.0260004
sp|Q9Y3S1|WNK2_HUMAN	WNK2	-0.0758714	-3.43948	0.000993622	0.0260004
tr|A0A1W2PNY9|A0A1W2PNY9_HUMAN	KCNMA1	-0.116529	-3.43757	0.000999604	0.0260004
sp|Q9UHQ4|BAP29_HUMAN	BCAP29	-0.110755	-3.43641	0.00100326	0.0260397
tr|A0A2R8YFW3|A0A2R8YFW3_HUMAN	TBL1X	0.103566	3.43347	0.00101258	0.0262257
sp|O75306|NDUS2_HUMAN	NDUFS2	-0.148421	-3.42971	0.00102465	0.0264093
sp|Q6PCB7|S27A1_HUMAN	SLC27A1	0.142464	3.42923	0.00102619	0.0264093
sp|Q96EQ0|SGTB_HUMAN	SGTB	-0.179784	-3.43033	0.00102264	0.0264093
sp|Q6GMV3|PTRD1_HUMAN	PTRHD1	0.167976	3.42804	0.00103003	0.0264304
sp|Q8TD55|PKHO2_HUMAN	PLEKHO2	0.17068	3.42763	0.00103137	0.0264304
sp|Q8WU79-2|SMAP2-2_HUMAN	SMAP2	-0.115417	-3.42363	0.0010444	0.026708
sp|P51970|NDUA8_HUMAN	NDUFA8	-0.177151	-3.41564	0.00107089	0.0267487
sp|P54819|KAD2_HUMAN	AK2	0.168134	3.41454	0.00107462	0.0267487
sp|P56181|NDUV3_HUMAN	NDUFV3	-0.263508	-3.41552	0.00107131	0.0267487
sp|P60903|S10AA_HUMAN	S100A10	0.559676	3.42032	0.00105531	0.0267487
sp|Q13418-2|ILK-2_HUMAN	ILK	0.193658	3.42051	0.00105466	0.0267487
sp|Q16816|PHKG1_HUMAN	PHKG1	0.213585	3.41647	0.00106813	0.0267487
sp|Q5T013-2|HYI-2_HUMAN	HYI	0.304368	3.41489	0.00107343	0.0267487
sp|Q8N3V7|SYNPO_HUMAN	SYNPO	-0.229841	-3.41972	0.0010573	0.0267487
sp|Q99714|HCD2_HUMAN	HSD17B10	0.114851	3.41985	0.00105686	0.0267487
sp|Q9UPP2|IQEC3_HUMAN	IQSEC3	-0.0960477	-3.41847	0.00106144	0.0267487
sp|Q9Y697-3|NFS1-3_HUMAN	NFS1	-0.123225	-3.41745	0.00106483	0.0267487
tr|G3V213|G3V213_HUMAN	AK2	0.180475	3.41656	0.00106782	0.0267487
tr|H7C1Y7|H7C1Y7_HUMAN	NDUFA10	-0.167581	-3.41717	0.00106577	0.0267487
sp|O14867|BACH1_HUMAN	BACH1	0.223053	3.41213	0.00108274	0.0268136
sp|Q9HAU0|PKHA5_HUMAN	PLEKHA5	0.111615	3.41181	0.00108385	0.0268136
tr|K7EN32|K7EN32_HUMAN	ECSIT	-0.215757	-3.41293	0.00108003	0.0268136
tr|E9PFI2|E9PFI2_HUMAN	STXBP5L	-0.123903	-3.40918	0.0010928	0.0269801
sp|Q15049|MLC1_HUMAN	MLC1	0.270838	3.40846	0.00109529	0.0269867
sp|Q96ES6|MFSD3_HUMAN	MFSD3	0.372845	3.40646	0.00110214	0.0271005
tr|H3BQZ9|H3BQZ9_HUMAN	APRT	0.262385	3.40491	0.0011075	0.0271773
sp|Q9NYL9|TMOD3_HUMAN	TMOD3	0.188985	3.40403	0.00111057	0.0271979
sp|Q6UX07|DHR13_HUMAN	DHRS13	0.148599	3.40213	0.00111717	0.0273044
sp|P46937|YAP1_HUMAN	YAP1	0.230553	3.4004	0.00112323	0.0273974
sp|Q6ZVL6|K154L_HUMAN	KIAA1549L	-0.175063	-3.39894	0.00112838	0.0274677
tr|H7C2W5|H7C2W5_HUMAN	NDUFA10	-0.165746	-3.39622	0.00113802	0.0276472
sp|Q8TER5-3|ARH40-3_HUMAN	ARHGEF40	0.134686	3.39353	0.00114764	0.0278252
sp|O95258|UCP5_HUMAN	SLC25A14	-0.146376	-3.39015	0.00115981	0.0280641
sp|P20309|ACM3_HUMAN	CHRM3	0.244834	3.38689	0.00117167	0.0282947
sp|Q5SRE7|PHYD1_HUMAN	PHYHD1	0.328357	3.38529	0.00117752	0.0283797
sp|P40763|STAT3_HUMAN	STAT3	0.173522	3.38173	0.00119067	0.0285831
sp|Q92629|SGCD_HUMAN	SGCD	0.197643	3.38178	0.00119049	0.0285831
sp|O60941-2|DTNB-2_HUMAN	DTNB	0.139558	3.38006	0.00119689	0.0286757
sp|O94973-2|AP2A2-2_HUMAN	AP2A2	-0.101831	-3.37723	0.00120747	0.0287591
sp|P36405|ARL3_HUMAN	ARL3	0.129107	3.37785	0.00120517	0.0287591
sp|P56556|NDUA6_HUMAN	NDUFA6	-0.17498	-3.37763	0.00120597	0.0287591
sp|Q96Q06-2|PLIN4-2_HUMAN	PLIN4	0.27407	3.37641	0.00121058	0.0287767
sp|P0C0L4|CO4A_HUMAN	C4A	0.381397	3.37165	0.00122863	0.0290141
sp|Q6DN14|MCTP1_HUMAN	MCTP1	-0.148549	-3.37089	0.00123155	0.0290141
sp|Q6NSJ0|MYORG_HUMAN	MYORG	0.174474	3.37064	0.00123251	0.0290141
sp|Q8WWN9|ICEF1_HUMAN	IPCEF1	-0.181167	-3.3726	0.00122503	0.0290141
sp|Q9Y484|WIPI4_HUMAN	WDR45	-0.111723	-3.37249	0.00122544	0.0290141
sp|O75431|MTX2_HUMAN	MTX2	-0.0943738	-3.36735	0.00124518	0.0290649
sp|P23229|ITA6_HUMAN	ITGA6	0.265716	3.36849	0.00124078	0.0290649
sp|P53609|PGTB1_HUMAN	PGGT1B	0.1969	3.36698	0.00124663	0.0290649
sp|Q9NW64|RBM22_HUMAN	RBM22	0.0946567	3.36871	0.00123992	0.0290649
tr|A0A087WX41|A0A087WX41_HUMAN	CLTCL1	-0.116874	-3.3672	0.00124575	0.0290649
sp|Q09013|DMPK_HUMAN	DMPK	-0.175575	-3.36476	0.00125525	0.0291376
sp|Q9BY89|K1671_HUMAN	KIAA1671	0.0971714	3.36432	0.00125695	0.0291376
sp|Q9HBI6|CP4FB_HUMAN	CYP4F11	0.275045	3.36437	0.00125676	0.0291376
sp|P27544-2|CERS1-2_HUMAN	CERS1	0.185906	3.3602	0.00127314	0.0294008
sp|P53675|CLH2_HUMAN	CLTCL1	-0.113615	-3.36068	0.00127126	0.0294008
sp|P07099|HYEP_HUMAN	EPHX1	0.211565	3.35517	0.00129319	0.0296386
sp|Q8TF61|FBX41_HUMAN	FBXO41	-0.128332	-3.35615	0.00128926	0.0296386
sp|Q93009|UBP7_HUMAN	USP7	-0.0671931	-3.35546	0.00129204	0.0296386
tr|F5H7P7|F5H7P7_HUMAN	PPWD1	0.136313	3.35693	0.00128613	0.0296386
tr|C9JQS3|C9JQS3_HUMAN	STXBP5L	-0.121154	-3.35424	0.00129693	0.0296682
sp|Q6DN14-3|MCTP1-3_HUMAN	MCTP1	-0.135062	-3.35275	0.00130294	0.0297035
sp|Q8NFH3|NUP43_HUMAN	NUP43	0.135426	3.35264	0.00130337	0.0297035
sp|O00339|MATN2_HUMAN	MATN2	0.312518	3.34551	0.00133251	0.0299098
sp|O60504|VINEX_HUMAN	SORBS3	0.196673	3.34275	0.00134393	0.0299098
sp|P27544|CERS1_HUMAN	CERS1	0.191193	3.34211	0.0013466	0.0299098
sp|P46019|KPB2_HUMAN	PHKA2	0.105806	3.34421	0.00133786	0.0299098
sp|Q08499|PDE4D_HUMAN	PDE4D	-0.126336	-3.3456	0.00133214	0.0299098
sp|Q08828|ADCY1_HUMAN	ADCY1	-0.148406	-3.34408	0.00133843	0.0299098
sp|Q5T013|HYI_HUMAN	HYI	0.251941	3.34481	0.00133538	0.0299098
sp|Q6H8Q1|ABLM2_HUMAN	ABLIM2	-0.144517	-3.34872	0.00131929	0.0299098
sp|Q86Y39-2|NDUAB-2_HUMAN	NDUFA11	-0.158739	-3.34295	0.00134312	0.0299098
sp|Q92954|PRG4_HUMAN	PRG4	0.524335	3.34687	0.00132689	0.0299098
sp|Q96D46|NMD3_HUMAN	NMD3	0.142551	3.34494	0.00133484	0.0299098
sp|Q9HCM2|PLXA4_HUMAN	PLXNA4	-0.126476	-3.34157	0.00134884	0.0299098
sp|Q9UBI6|GBG12_HUMAN	GNG12	0.238125	3.34316	0.00134221	0.0299098
tr|E9PLT2|E9PLT2_HUMAN	UBTF	0.150951	3.34145	0.00134935	0.0299098
tr|H8Y6P7|H8Y6P7_HUMAN	GCOM1	0.104153	3.34361	0.00134034	0.0299098
sp|O94973|AP2A2_HUMAN	AP2A2	-0.102496	-3.34069	0.00135255	0.029926
sp|Q9BQI7|PSD2_HUMAN	PSD2	0.163074	3.33672	0.00136923	0.0301861
sp|Q9UQ16-2|DYN3-2_HUMAN	DNM3	-0.0963479	-3.33671	0.00136927	0.0301861
sp|Q9UEY8-2|ADDG-2_HUMAN	ADD3	0.154152	3.33391	0.00138119	0.0303584
tr|A0A2Y9D025|A0A2Y9D025_HUMAN	NDUFA6	-0.16571	-3.3337	0.00138209	0.0303584
sp|Q99418|CYH2_HUMAN	CYTH2	-0.107873	-3.33307	0.00138479	0.0303628
sp|Q9UHB6|LIMA1_HUMAN	LIMA1	0.144413	3.33166	0.00139082	0.0304401
sp|P08559|ODPA_HUMAN	PDHA1	-0.126111	-3.32971	0.00139925	0.0305147
sp|P17568|NDUB7_HUMAN	NDUFB7	-0.154505	-3.3299	0.0013984	0.0305147
sp|O95347|SMC2_HUMAN	SMC2	0.128647	3.32639	0.00141362	0.0306425
sp|Q63ZY3|KANK2_HUMAN	KANK2	0.266385	3.32775	0.0014077	0.0306425
sp|Q86W92|LIPB1_HUMAN	PPFIBP1	0.139542	3.32696	0.00141114	0.0306425
tr|A0A140TA44|A0A140TA44_HUMAN	C4A	0.373839	3.32603	0.0014152	0.0306425
sp|O75380|NDUS6_HUMAN	NDUFS6	-0.155827	-3.32443	0.00142224	0.0307401
sp|P0C0L5|CO4B_HUMAN	C4B	0.373583	3.3209	0.00143778	0.0309408
sp|Q16401|PSMD5_HUMAN	PSMD5	0.107766	3.32059	0.00143917	0.0309408
sp|Q8IUZ5|AT2L2_HUMAN	PHYKPL	0.195417	3.32123	0.00143631	0.0309408
sp|P29144|TPP2_HUMAN	TPP2	-0.0979264	-3.31902	0.00144616	0.0309816
sp|Q5JSL3|DOC11_HUMAN	DOCK11	0.126578	3.31957	0.00144368	0.0309816
sp|O00339-2|MATN2-2_HUMAN	MATN2	0.308488	3.31803	0.00145058	0.0309915
sp|O43301|HS12A_HUMAN	HSPA12A	-0.113292	-3.31745	0.00145317	0.0309915
sp|Q9H6F2|TM38A_HUMAN	TMEM38A	-0.246893	-3.3172	0.00145428	0.0309915
sp|Q9UQ16-3|DYN3-3_HUMAN	DNM3	-0.0918329	-3.31204	0.00147757	0.0313777
tr|F6QMI7|F6QMI7_HUMAN	DST	0.0907487	3.31235	0.00147618	0.0313777
sp|Q8N350-4|CBARP-4_HUMAN	CBARP	-0.199073	-3.31093	0.00148264	0.0314305
sp|Q13153|PAK1_HUMAN	PAK1	-0.150156	-3.30816	0.00149535	0.0316447
sp|P37198|NUP62_HUMAN	NUP62	0.082484	3.30681	0.00150156	0.0316657
sp|Q06830|PRDX1_HUMAN	PRDX1	0.183212	3.30687	0.00150126	0.0316657
tr|H7C4T6|H7C4T6_HUMAN	CADPS	-0.123631	-3.30547	0.00150777	0.0317416
tr|E5RFX0|E5RFX0_HUMAN	HACE1	0.165319	3.30433	0.00151307	0.0317981
sp|Q9UQE7|SMC3_HUMAN	SMC3	0.167842	3.30351	0.00151687	0.0318228
sp|Q24JP5|T132A_HUMAN	TMEM132A	0.103881	3.30294	0.00151954	0.0318239
sp|O60907|TBL1X_HUMAN	TBL1X	0.111174	3.30137	0.00152688	0.0318677
sp|Q9Y508|RN114_HUMAN	RNF114	0.177377	3.30171	0.00152528	0.0318677
sp|O76054|S14L2_HUMAN	SEC14L2	0.147188	3.2917	0.00157289	0.0318997
sp|O95336|6PGL_HUMAN	PGLS	0.156181	3.29753	0.00154498	0.0318997
sp|O96019|ACL6A_HUMAN	ACTL6A	0.109251	3.2897	0.00158257	0.0318997
sp|P16615|AT2A2_HUMAN	ATP2A2	-0.10653	-3.29621	0.00155127	0.0318997
sp|P35219|CAH8_HUMAN	CA8	0.202879	3.29817	0.00154196	0.0318997
sp|Q96BW5|PTER_HUMAN	PTER	0.449894	3.29966	0.00153491	0.0318997
sp|Q96DH6|MSI2H_HUMAN	MSI2	0.150319	3.28949	0.00158356	0.0318997
sp|Q96K76-4|UBP47-4_HUMAN	USP47	0.0786796	3.29105	0.00157602	0.0318997
sp|Q96K76|UBP47_HUMAN	USP47	0.0786993	3.29886	0.00153871	0.0318997
sp|Q96Q06|PLIN4_HUMAN	PLIN4	0.268156	3.29716	0.00154675	0.0318997
sp|Q9BZG1|RAB34_HUMAN	RAB34	0.212447	3.29099	0.00157633	0.0318997
sp|Q9NUQ6|SPS2L_HUMAN	SPATS2L	0.147613	3.29958	0.0015353	0.0318997
sp|Q9UK22|FBX2_HUMAN	FBXO2	0.153438	3.29606	0.00155196	0.0318997
sp|Q9UQ16|DYN3_HUMAN	DNM3	-0.0958802	-3.29408	0.00156146	0.0318997
sp|Q9Y490|TLN1_HUMAN	TLN1	0.190852	3.29364	0.00156356	0.0318997
sp|Q9Y6M7-13|S4A7-13_HUMAN	SLC4A7	-0.241193	-3.2914	0.00157434	0.0318997
sp|Q9Y6M7|S4A7_HUMAN	SLC4A7	-0.246595	-3.29002	0.00158099	0.0318997
tr|A0A087WVF8|A0A087WVF8_HUMAN	PDE4DIP	0.108154	3.29086	0.00157695	0.0318997
tr|E9PSI1|E9PSI1_HUMAN	NA	0.155626	3.29449	0.00155946	0.0318997
tr|H0YB70|H0YB70_HUMAN	HYI	0.245795	3.2948	0.001558	0.0318997
tr|H0YDE5|H0YDE5_HUMAN	KIAA1549L	-0.167499	-3.29092	0.00157666	0.0318997
sp|P29401|TKT_HUMAN	TKT	0.171446	3.28754	0.00159307	0.0320381
sp|O14791|APOL1_HUMAN	APOL1	0.272668	3.28392	0.00161086	0.0322066
sp|O14880|MGST3_HUMAN	MGST3	-0.119242	-3.27941	0.00163327	0.0322066
sp|O95452|CXB6_HUMAN	GJB6	-0.365365	-3.28108	0.00162493	0.0322066
sp|P36955|PEDF_HUMAN	SERPINF1	-0.183094	-3.2796	0.00163228	0.0322066
sp|P46020-2|KPB1-2_HUMAN	PHKA1	0.160963	3.2806	0.00162732	0.0322066
sp|P84074|HPCA_HUMAN	HPCA	-0.182404	-3.28404	0.00161027	0.0322066
sp|Q03252|LMNB2_HUMAN	LMNB2	0.102066	3.27966	0.00163198	0.0322066
sp|Q6H8Q1-2|ABLM2-2_HUMAN	ABLIM2	-0.141861	-3.28305	0.00161513	0.0322066
sp|Q8N350|CBARP_HUMAN	CBARP	-0.164529	-3.28319	0.00161447	0.0322066
sp|Q8TAE6|PP14C_HUMAN	PPP1R14C	-0.176105	-3.28252	0.00161775	0.0322066
tr|A0A0B4J1R6|A0A0B4J1R6_HUMAN	TKT	0.170432	3.28119	0.00162439	0.0322066
tr|E9PQR4|E9PQR4_HUMAN	TUB	0.10827	3.28013	0.00162964	0.0322066
sp|O75936|BODG_HUMAN	BBOX1	0.348953	3.27667	0.00164698	0.0324243
tr|A0A0J9YXN7|A0A0J9YXN7_HUMAN	PLIN4	0.264831	3.27484	0.00165626	0.0325544
sp|P05141|ADT2_HUMAN	SLC25A5	-0.137813	-3.27219	0.00166969	0.0327125
sp|P46020|KPB1_HUMAN	PHKA1	0.160576	3.27243	0.00166851	0.0327125
sp|P00387-3|NB5R3-3_HUMAN	CYB5R3	0.136097	3.27152	0.00167313	0.0327155
sp|P16035|TIMP2_HUMAN	TIMP2	0.245428	3.27084	0.00167663	0.0327155
sp|Q10567|AP1B1_HUMAN	AP1B1	-0.0883582	-3.27058	0.00167792	0.0327155
sp|Q8NCN5|PDPR_HUMAN	PDPR	0.15339	3.26814	0.00169053	0.0329084
sp|Q99747|SNAG_HUMAN	NAPG	-0.0969326	-3.26751	0.00169375	0.0329183
sp|O00255|MEN1_HUMAN	MEN1	0.154571	3.26516	0.00170594	0.0329444
sp|Q92952|KCNN1_HUMAN	KCNN1	0.257772	3.26578	0.00170274	0.0329444
tr|K7EIG1|K7EIG1_HUMAN	CLUH	-0.0603022	-3.26646	0.00169921	0.0329444
tr|Q5T0V7|Q5T0V7_HUMAN	DST	0.0946507	3.26543	0.00170456	0.0329444
sp|P10636-5|TAU-5_HUMAN	MAPT	0.13541	3.26304	0.00171705	0.0330348
tr|G3XAH0|G3XAH0_HUMAN	2023-09-05	-0.158863	-3.26271	0.00171878	0.0330348
tr|H0YAP0|H0YAP0_HUMAN	ZC2HC1A	-0.205927	-3.26301	0.00171719	0.0330348
sp|O14773|TPP1_HUMAN	TPP1	0.150493	3.26044	0.00173072	0.0330552
sp|P36894|BMR1A_HUMAN	BMPR1A	0.191752	3.26162	0.0017245	0.0330552
sp|Q63HR2|TNS2_HUMAN	TNS2	0.168777	3.2612	0.00172667	0.0330552
sp|Q9Y6C2|EMIL1_HUMAN	EMILIN1	0.233788	3.26076	0.00172901	0.0330552
sp|Q9NVE5|UBP40_HUMAN	USP40	0.158466	3.25784	0.00174445	0.0332129
tr|E9PF55|E9PF55_HUMAN	TNS1	0.180215	3.25815	0.00174283	0.0332129
sp|Q8IV38|ANKY2_HUMAN	ANKMY2	-0.120704	-3.25575	0.00175561	0.0332887
sp|Q969Z3|MARC2_HUMAN	2023-03-02	-0.140069	-3.25505	0.0017594	0.0332887
sp|Q96PM5|ZN363_HUMAN	RCHY1	0.168277	3.25564	0.00175619	0.0332887
sp|Q9Y6U3|ADSV_HUMAN	SCIN	0.427821	3.25538	0.00175761	0.0332887
sp|Q99719|SEPT5_HUMAN	2023-09-05	-0.158944	-3.25269	0.00177207	0.0334764
sp|P48729|KC1A_HUMAN	CSNK1A1	0.109476	3.25055	0.00178367	0.0335798
sp|Q15283|RASA2_HUMAN	RASA2	-0.116372	-3.24964	0.0017886	0.0335798
sp|Q5HYC2|K2026_HUMAN	KIAA2026	0.592445	3.24983	0.00178757	0.0335798
tr|D3DSM0|D3DSM0_HUMAN	ITGB2	0.252245	3.25085	0.00178205	0.0335798
sp|Q14980|NUMA1_HUMAN	NUMA1	0.16789	3.24841	0.00179528	0.0336322
tr|A0A1B0GTF3|A0A1B0GTF3_HUMAN	HSPA12A	-0.111537	-3.24811	0.00179693	0.0336322
sp|Q6IQ23|PKHA7_HUMAN	PLEKHA7	0.268591	3.24691	0.0018035	0.0337032
sp|O43426|SYNJ1_HUMAN	SYNJ1	-0.108413	-3.24408	0.0018191	0.033852
sp|Q9ULU8|CAPS1_HUMAN	CADPS	-0.115572	-3.24395	0.00181982	0.033852
sp|Q9Y4I1-2|MYO5A-2_HUMAN	MYO5A	-0.0857898	-3.24459	0.00181631	0.033852
sp|P40189|IL6RB_HUMAN	IL6ST	0.091498	3.24242	0.00182834	0.0338598
sp|Q8WZA0|LZIC_HUMAN	LZIC	0.16181	3.24333	0.00182325	0.0338598
sp|Q96HH9|GRM2B_HUMAN	GRAMD2B	0.216059	3.24237	0.0018286	0.0338598
sp|P54136|SYRC_HUMAN	RARS	-0.0674214	-3.24096	0.00183645	0.033908
sp|Q9HAU0-6|PKHA5-6_HUMAN	PLEKHA5	0.0993541	3.2409	0.00183679	0.033908
sp|Q9BRK0|REEP2_HUMAN	REEP2	-0.128047	-3.24006	0.00184146	0.0339426
sp|O00217|NDUS8_HUMAN	NDUFS8	-0.148344	-3.23832	0.00185126	0.0340716
sp|O60229|KALRN_HUMAN	KALRN	-0.0889396	-3.23458	0.00187239	0.0342529
sp|Q6IQ23-2|PKHA7-2_HUMAN	PLEKHA7	0.267361	3.23546	0.00186735	0.0342529
sp|Q9Y5I4|PCDC2_HUMAN	PCDHAC2	-0.113657	-3.23522	0.00186874	0.0342529
tr|A0A0A0MTP6|A0A0A0MTP6_HUMAN	INPPL1	0.106903	3.23496	0.00187023	0.0342529
sp|P02792|FRIL_HUMAN	FTL	0.433113	3.23377	0.00187696	0.0342849
sp|Q53TN4|CYBR1_HUMAN	CYBRD1	0.227958	3.23203	0.00188693	0.0344153
sp|O75061|AUXI_HUMAN	DNAJC6	-0.106002	-3.22945	0.00190173	0.034543
sp|P21333|FLNA_HUMAN	FLNA	0.384434	3.22956	0.00190112	0.034543
sp|Q07954|LRP1_HUMAN	LRP1	0.0656787	3.22933	0.00190247	0.034543
sp|P08758|ANXA5_HUMAN	ANXA5	0.28387	3.22853	0.00190704	0.0345744
sp|P40763-2|STAT3-2_HUMAN	STAT3	0.159173	3.22615	0.00192087	0.0346698
sp|Q04721|NOTC2_HUMAN	NOTCH2	0.114727	3.22709	0.0019154	0.0346698
sp|Q9Y624|JAM1_HUMAN	F11R	0.189702	3.22623	0.00192043	0.0346698
sp|O14810|CPLX1_HUMAN	CPLX1	-0.282997	-3.22263	0.00194143	0.0346802
sp|O75582|KS6A5_HUMAN	RPS6KA5	0.199228	3.22474	0.0019291	0.0346802
sp|P29350-2|PTN6-2_HUMAN	PTPN6	0.18546	3.22355	0.00193604	0.0346802
sp|Q9HAU0-4|PKHA5-4_HUMAN	PLEKHA5	0.100266	3.22467	0.00192951	0.0346802
tr|E9PKC0|E9PKC0_HUMAN	PLEKHA7	0.265165	3.22455	0.00193017	0.0346802
tr|F8WBA9|F8WBA9_HUMAN	SELENBP1	0.34074	3.2231	0.0019387	0.0346802
tr|H7C5E2|H7C5E2_HUMAN	BCAP29	-0.10332	-3.22309	0.00193873	0.0346802
sp|P23229-2|ITA6-2_HUMAN	ITGA6	0.256344	3.21811	0.00196823	0.035014
sp|Q53GG5|PDLI3_HUMAN	PDLIM3	0.259714	3.21802	0.00196876	0.035014
sp|Q6PKH6|DR4L2_HUMAN	DHRS4L2	0.246921	3.21874	0.00196446	0.035014
sp|O75061-2|AUXI-2_HUMAN	DNAJC6	-0.110831	-3.21665	0.00197689	0.0350455
sp|Q8N3C0|ASCC3_HUMAN	ASCC3	0.13062	3.21579	0.00198208	0.0350455
sp|Q9UKS6|PACN3_HUMAN	PACSIN3	0.143104	3.21618	0.00197973	0.0350455
tr|A0A3F2YNY5|A0A3F2YNY5_HUMAN	KCNN2	0.26471	3.21633	0.00197881	0.0350455
sp|P15311|EZRI_HUMAN	EZR	0.209427	3.21366	0.00199485	0.0351171
sp|P49821|NDUV1_HUMAN	NDUFV1	-0.150459	-3.21457	0.00198939	0.0351171
sp|Q5VU43-12|MYOME-12_HUMAN	PDE4DIP	0.218277	3.2137	0.00199467	0.0351171
sp|Q7Z4H8|PLGT3_HUMAN	KDELC2	0.221672	3.21279	0.00200013	0.0351171
sp|Q96T17-5|MA7D2-5_HUMAN	MAP7D2	-0.142473	-3.21224	0.00200347	0.0351171
tr|C9JPK3|C9JPK3_HUMAN	STXBP5L	-0.128536	-3.21255	0.00200156	0.0351171
sp|Q9NQX7|ITM2C_HUMAN	ITM2C	0.137096	3.21019	0.00201589	0.0352838
sp|Q9BUR5|MIC26_HUMAN	APOO	-0.139154	-3.20853	0.00202605	0.0354106
sp|O15344|TRI18_HUMAN	MID1	0.113579	3.20739	0.00203302	0.0354305
sp|P55283|CADH4_HUMAN	CDH4	0.134974	3.20763	0.00203154	0.0354305
sp|O43677|NDUC1_HUMAN	NDUFC1	-0.224998	-3.20587	0.00204236	0.0354915
sp|Q9P2R3|ANFY1_HUMAN	ANKFY1	0.116188	3.20596	0.00204183	0.0354915
sp|Q9H2S1|KCNN2_HUMAN	KCNN2	0.263593	3.20508	0.00204728	0.0355262
sp|Q6H8Q1-6|ABLM2-6_HUMAN	ABLIM2	-0.132234	-3.20456	0.00205048	0.0355309
sp|Q16890|TPD53_HUMAN	TPD52L1	0.166866	3.20285	0.00206108	0.0356638
sp|Q15404|RSU1_HUMAN	RSU1	0.17182	3.20137	0.00207033	0.035727
tr|F5H836|F5H836_HUMAN	PXN	0.233385	3.20132	0.00207062	0.035727
tr|H0Y8L5|H0Y8L5_HUMAN	MLIP	-0.213525	-3.20049	0.00207583	0.0357661
sp|P48729-2|KC1A-2_HUMAN	CSNK1A1	0.10499	3.19953	0.00208184	0.0358188
sp|Q01130|SRSF2_HUMAN	SRSF2	0.0833884	3.19788	0.00209219	0.0359257
sp|Q66PJ3|AR6P4_HUMAN	ARL6IP4	0.11035	3.1976	0.00209397	0.0359257
sp|Q8TEW0|PARD3_HUMAN	PARD3	0.145523	3.19522	0.00210907	0.0360051
sp|Q96FS4|SIPA1_HUMAN	SIPA1	0.156376	3.19639	0.00210164	0.0360051
sp|Q9UIW2|PLXA1_HUMAN	PLXNA1	-0.124991	-3.195	0.00211045	0.0360051
sp|Q9Y6I3-1|EPN1-1_HUMAN	EPN1	-0.123683	-3.19518	0.00210932	0.0360051
sp|Q16890-2|TPD53-2_HUMAN	TPD52L1	0.125129	3.19369	0.00211877	0.0360964
sp|P48059|LIMS1_HUMAN	LIMS1	0.197731	3.19133	0.00213388	0.0363028
sp|Q9Y5L4|TIM13_HUMAN	TIMM13	-0.10166	-3.19024	0.00214092	0.0363717
sp|P42263-2|GRIA3-2_HUMAN	GRIA3	-0.176028	-3.18707	0.00216143	0.0366222
sp|Q8TCU6|PREX1_HUMAN	PREX1	0.123899	3.18703	0.00216169	0.0366222
sp|Q9NQ66-2|PLCB1-2_HUMAN	PLCB1	-0.176246	-3.18461	0.00217749	0.0368383
sp|O75864|PPR37_HUMAN	PPP1R37	-0.0969243	-3.18354	0.00218452	0.036906
sp|Q07960|RHG01_HUMAN	ARHGAP1	0.103283	3.18219	0.00219336	0.0370007
sp|Q8N987|NECA1_HUMAN	NECAB1	-0.163257	-3.1813	0.00219927	0.0370007
tr|C9JJD3|C9JJD3_HUMAN	AP2M1	-0.117561	-3.18141	0.00219853	0.0370007
sp|O43374|RASL2_HUMAN	RASA4	0.254309	3.17949	0.00221125	0.0370727
sp|O94925|GLSK_HUMAN	GLS	-0.12185	-3.17997	0.0022081	0.0370727
sp|P51157|RAB28_HUMAN	RAB28	0.144522	3.17881	0.00221575	0.0370727
sp|Q9Y4I1|MYO5A_HUMAN	MYO5A	-0.0837685	-3.17908	0.00221399	0.0370727
sp|P56134|ATPK_HUMAN	ATP5MF	-0.156859	-3.17834	0.00221893	0.0370748
sp|P07108-5|ACBP-5_HUMAN	DBI	0.250237	3.17615	0.00223357	0.0371863
sp|P07108|ACBP_HUMAN	DBI	0.250152	3.17505	0.00224091	0.0371863
sp|P29803|ODPAT_HUMAN	PDHA2	-0.133013	-3.17679	0.00222923	0.0371863
sp|Q29RF7|PDS5A_HUMAN	PDS5A	0.1227	3.1759	0.00223524	0.0371863
sp|Q8N573|OXR1_HUMAN	OXR1	-0.140741	-3.17507	0.00224078	0.0371863
sp|Q99689|FEZ1_HUMAN	FEZ1	0.122857	3.17438	0.00224543	0.0372094
sp|Q9NQ66|PLCB1_HUMAN	PLCB1	-0.173417	-3.17394	0.00224843	0.0372094
sp|P16591|FER_HUMAN	FER	0.13561	3.17258	0.0022576	0.0373102
sp|P03915|NU5M_HUMAN	MT-ND5	-0.157098	-3.17117	0.00226717	0.0373253
sp|P04406-2|G3P-2_HUMAN	GAPDH	0.0643403	3.17109	0.00226773	0.0373253
sp|P30542|AA1R_HUMAN	ADORA1	-0.221916	-3.17151	0.00226489	0.0373253
sp|Q9NYB0|TE2IP_HUMAN	TERF2IP	0.0713446	3.16894	0.00228241	0.0375161
sp|P28331|NDUS1_HUMAN	NDUFS1	-0.123645	-3.16783	0.00228997	0.0375718
sp|Q14CZ8|HECAM_HUMAN	HEPACAM	0.230965	3.16754	0.00229198	0.0375718
sp|Q96D96|HVCN1_HUMAN	HVCN1	0.20173	3.1664	0.00229983	0.0376342
tr|A0A2R8Y7R9|A0A2R8Y7R9_HUMAN	PPFIA1	0.0462424	3.16609	0.00230198	0.0376342
sp|Q9Y6M9|NDUB9_HUMAN	NDUFB9	-0.134353	-3.16496	0.00230974	0.0376782
tr|A0A0M3HER1|A0A0M3HER1_HUMAN	LIMS1	0.200184	3.1648	0.00231088	0.0376782
sp|O00468|AGRIN_HUMAN	AGRN	0.116229	3.16251	0.00232679	0.0378271
sp|P17677|NEUM_HUMAN	GAP43	-0.152034	-3.16214	0.00232936	0.0378271
sp|Q12955|ANK3_HUMAN	ANK3	-0.0970963	-3.16254	0.00232654	0.0378271
tr|K7EJJ5|K7EJJ5_HUMAN	CLTC	-0.125459	-3.16075	0.00233906	0.037934
sp|Q14982-3|OPCM-3_HUMAN	OPCML	-0.125986	-3.16026	0.00234252	0.0379394
sp|O43676|NDUB3_HUMAN	NDUFB3	-0.156845	-3.15756	0.00236152	0.0379938
sp|O75494|SRS10_HUMAN	SRSF10	0.0983181	3.15928	0.0023494	0.0379938
sp|P20618|PSB1_HUMAN	PSMB1	0.0666439	3.15779	0.00235989	0.0379938
sp|Q9UEY8|ADDG_HUMAN	ADD3	0.144154	3.15821	0.00235692	0.0379938
tr|H0Y7J9|H0Y7J9_HUMAN	WNK2	-0.0713527	-3.15819	0.00235705	0.0379938
sp|P10620-2|MGST1-2_HUMAN	MGST1	0.318444	3.1547	0.0023818	0.0381227
sp|P43490|NAMPT_HUMAN	NAMPT	0.240453	3.15537	0.00237702	0.0381227
sp|Q9HCS2|CP4FC_HUMAN	CYP4F12	0.297969	3.15466	0.00238208	0.0381227
sp|Q9NQ29|LUC7L_HUMAN	LUC7L	0.114487	3.15592	0.00237315	0.0381227
sp|C9J798|RAS4B_HUMAN	RASA4B	0.238788	3.15337	0.00239124	0.0381847
sp|Q96PQ0|SORC2_HUMAN	SORCS2	0.131282	3.15323	0.00239224	0.0381847
tr|B0QZE2|B0QZE2_HUMAN	ZMYND11	0.159304	3.15254	0.00239719	0.0382134
sp|Q9Y5Y2|NUBP2_HUMAN	NUBP2	0.134885	3.1499	0.00241616	0.0384654
tr|H0YCW1|H0YCW1_HUMAN	FNTA	0.176989	3.14923	0.00242101	0.0384922
sp|O00468-3|AGRIN-3_HUMAN	AGRN	0.116004	3.14734	0.00243475	0.0386221
sp|O75083|WDR1_HUMAN	WDR1	0.134193	3.14679	0.00243872	0.0386221
sp|Q8TE77|SSH3_HUMAN	SSH3	0.15509	3.14697	0.00243746	0.0386221
sp|Q13424|SNTA1_HUMAN	SNTA1	0.172552	3.14414	0.00245809	0.0386768
sp|Q86US8|EST1A_HUMAN	SMG6	0.0702138	3.14425	0.0024573	0.0386768
sp|Q96S66|CLCC1_HUMAN	CLCC1	0.104546	3.14471	0.00245394	0.0386768
sp|Q9BXT8|RNF17_HUMAN	RNF17	0.294407	3.1446	0.00245476	0.0386768
tr|H0Y9E9|H0Y9E9_HUMAN	ANK3	-0.0832711	-3.14424	0.00245736	0.0386768
sp|Q9NUQ9|FA49B_HUMAN	FAM49B	-0.101649	-3.14172	0.00247592	0.0388611
sp|Q9Y512|SAM50_HUMAN	SAMM50	-0.0759129	-3.14168	0.00247621	0.0388611
sp|P49748|ACADV_HUMAN	ACADVL	0.171921	3.13956	0.00249194	0.0390553
sp|Q5JTJ3|COA6_HUMAN	COA6	-0.148017	-3.13914	0.00249501	0.0390553
sp|O14594|NCAN_HUMAN	NCAN	-0.132148	-3.13739	0.00250804	0.0391739
sp|Q96C11|FGGY_HUMAN	FGGY	0.171045	3.13726	0.00250904	0.0391739
sp|O43181|NDUS4_HUMAN	NDUFS4	-0.170709	-3.13522	0.00252437	0.0393122
sp|P10636-4|TAU-4_HUMAN	MAPT	0.130472	3.13536	0.00252326	0.0393122
sp|Q9Y2J8|PADI2_HUMAN	PADI2	0.302731	3.13391	0.00253422	0.0394151
sp|P08567|PLEK_HUMAN	PLEK	0.262773	3.13028	0.00256171	0.0397917
sp|P09525|ANXA4_HUMAN	ANXA4	0.2294	3.12912	0.00257061	0.0398281
tr|A0JP02|A0JP02_HUMAN	PLEKHA5	0.10834	3.12938	0.00256863	0.0398281
sp|O14556|G3PT_HUMAN	GAPDHS	0.0966546	3.12639	0.00259155	0.039954
sp|Q99943|PLCA_HUMAN	AGPAT1	-0.0934185	-3.12754	0.0025827	0.039954
sp|Q9H008|LHPP_HUMAN	LHPP	0.190823	3.12634	0.0025919	0.039954
tr|G3V2X9|G3V2X9_HUMAN	ACTN1	-0.162825	-3.12716	0.00258561	0.039954
sp|Q9Y3D2|MSRB2_HUMAN	MSRB2	0.0966894	3.12582	0.00259593	0.0399654
sp|Q6P3S6|FBX42_HUMAN	FBXO42	-0.0843665	-3.12447	0.00260639	0.0400443
tr|H0Y329|H0Y329_HUMAN	WDR45	-0.113733	-3.12431	0.00260764	0.0400443
sp|Q9BVJ6|UT14A_HUMAN	UTP14A	0.160272	3.12384	0.00261125	0.040049
sp|G9CGD6-3|CNIPF-3_HUMAN	CNK3	-0.161492	-3.12122	0.00263166	0.0401659
sp|Q13546|RIPK1_HUMAN	RIPK1	0.147809	3.12097	0.00263359	0.0401659
sp|Q53GG5-2|PDLI3-2_HUMAN	PDLIM3	0.25533	3.12233	0.00262301	0.0401659
sp|Q6ZVM7|TM1L2_HUMAN	TOM1L2	-0.0912721	-3.12074	0.0026354	0.0401659
tr|H3BQK9|H3BQK9_HUMAN	MACF1	0.0759689	3.12137	0.00263048	0.0401659
sp|Q13247|SRSF6_HUMAN	SRSF6	0.0940575	3.11866	0.00265175	0.0403274
sp|Q8TDM6|DLG5_HUMAN	DLG5	0.078491	3.11855	0.00265264	0.0403274
sp|Q9H902|REEP1_HUMAN	REEP1	-0.1291	-3.11795	0.00265734	0.0403484
sp|O75489|NDUS3_HUMAN	NDUFS3	-0.12739	-3.11661	0.00266796	0.0404591
sp|Q00796|DHSO_HUMAN	SORD	0.261077	3.11595	0.00267313	0.040487
sp|O75914|PAK3_HUMAN	PAK3	-0.0969815	-3.11348	0.00269282	0.0407344
sp|Q8NEL9|DDHD1_HUMAN	DDHD1	-0.100501	-3.11156	0.00270824	0.0408796
sp|Q9UQF2|JIP1_HUMAN	MAPK8IP1	0.116938	3.11102	0.00271252	0.0408796
tr|A0A0A6YYJ5|A0A0A6YYJ5_HUMAN	MACF1	0.0765438	3.11111	0.00271184	0.0408796
sp|Q7Z6K5|ARPIN_HUMAN	ARPIN	0.126602	3.10944	0.00272524	0.0410205
sp|Q9BV20|MTNA_HUMAN	MRI1	0.252689	3.10846	0.0027332	0.0410894
sp|Q03001|DYST_HUMAN	DST	0.0844814	3.10749	0.00274104	0.0411562
sp|O00468-6|AGRIN-6_HUMAN	AGRN	0.115258	3.10493	0.0027619	0.0411642
sp|P18846|ATF1_HUMAN	ATF1	0.16537	3.10575	0.00275523	0.0411642
sp|P20700|LMNB1_HUMAN	LMNB1	0.123836	3.10606	0.0027527	0.0411642
sp|Q8IZU8|DSEL_HUMAN	DSEL	-0.185765	-3.10522	0.00275955	0.0411642
sp|Q99969|RARR2_HUMAN	RARRES2	0.221893	3.10618	0.0027517	0.0411642
tr|A0A096LP69|A0A096LP69_HUMAN	CD99	0.364021	3.10557	0.00275665	0.0411642
sp|Q9H6X2|ANTR1_HUMAN	ANTXR1	0.221055	3.10362	0.00277261	0.041259
sp|Q9HBL0|TENS1_HUMAN	TNS1	0.168632	3.10333	0.00277506	0.041259
sp|P10515|ODP2_HUMAN	DLAT	-0.133728	-3.10169	0.00278849	0.0414081
tr|A0A0D9SGI7|A0A0D9SGI7_HUMAN	PLCB1	-0.19137	-3.10072	0.00279658	0.0414775
sp|O43678|NDUA2_HUMAN	NDUFA2	-0.1688	-3.09485	0.00284548	0.0415169
sp|P28799|GRN_HUMAN	GRN	0.211525	3.09306	0.00286062	0.0415169
sp|P48059-3|LIMS1-3_HUMAN	LIMS1	0.190754	3.09699	0.00282755	0.0415169
sp|Q14019|COTL1_HUMAN	COTL1	0.248755	3.09902	0.00281066	0.0415169
sp|Q15654|TRIP6_HUMAN	TRIP6	0.193305	3.09869	0.00281338	0.0415169
sp|Q15814|TBCC_HUMAN	TBCC	-0.078177	-3.09401	0.00285259	0.0415169
sp|Q16623|STX1A_HUMAN	STX1A	-0.150311	-3.09304	0.00286076	0.0415169
sp|Q5RKV6|EXOS6_HUMAN	EXOSC6	0.142287	3.09437	0.00284953	0.0415169
sp|Q86UP2-3|KTN1-3_HUMAN	KTN1	0.113338	3.09951	0.00280661	0.0415169
sp|Q86WG3|ATCAY_HUMAN	ATCAY	-0.128655	-3.09726	0.00282533	0.0415169
sp|Q8N573-2|OXR1-2_HUMAN	OXR1	-0.146535	-3.0951	0.00284341	0.0415169
sp|Q92688|AN32B_HUMAN	ANP32B	0.162239	3.09478	0.00284608	0.0415169
sp|Q96HE7|ERO1A_HUMAN	ERO1A	-0.101585	-3.09356	0.0028564	0.0415169
sp|Q9BWF3|RBM4_HUMAN	RBM4	0.0901187	3.09365	0.00285562	0.0415169
sp|Q9BYK8-2|HELZ2-2_HUMAN	HELZ2	0.254517	3.09687	0.00282853	0.0415169
sp|Q9H4L4|SENP3_HUMAN	SENP3	0.147569	3.09415	0.00285139	0.0415169
tr|A0A2R8Y5J0|A0A2R8Y5J0_HUMAN	CHD4	0.0854919	3.09976	0.00280453	0.0415169
tr|H3BRW5|H3BRW5_HUMAN	NA	-0.277059	-3.09404	0.0028523	0.0415169
sp|Q9UNA1|RHG26_HUMAN	ARHGAP26	-0.144528	-3.09112	0.00287704	0.0417033
sp|Q9ULU8-2|CAPS1-2_HUMAN	CADPS	-0.112908	-3.08849	0.00289947	0.0419784
sp|O60282|KIF5C_HUMAN	KIF5C	-0.0685397	-3.0861	0.00292	0.0422253
sp|P0CAP2|GRL1A_HUMAN	POLR2M	0.0918597	3.08504	0.00292911	0.0422564
tr|F5GYR0|F5GYR0_HUMAN	ABLIM2	-0.126099	-3.08515	0.00292815	0.0422564
sp|Q15165|PON2_HUMAN	PON2	0.215747	3.08367	0.00294093	0.0423767
tr|H3BV16|H3BV16_HUMAN	NDUFB10	-0.122216	-3.08282	0.00294839	0.0424337
sp|P22087|FBRL_HUMAN	FBL	0.100918	3.08144	0.00296034	0.0425553
sp|P05107|ITB2_HUMAN	ITGB2	0.237079	3.07981	0.00297463	0.0425692
sp|P21266|GSTM3_HUMAN	GSTM3	0.275845	3.07973	0.00297532	0.0425692
sp|Q5VWP3|MLIP_HUMAN	MLIP	-0.212896	-3.08041	0.00296936	0.0425692
sp|Q96HY6|DDRGK_HUMAN	DDRGK1	0.136264	3.08038	0.00296961	0.0425692
sp|Q9BUF5|TBB6_HUMAN	TUBB6	-0.0725168	-3.07876	0.0029838	0.0426403
sp|Q8N5M1|ATPF2_HUMAN	ATPAF2	0.121505	3.07768	0.00299335	0.0426656
sp|Q9P0J0|NDUAD_HUMAN	NDUFA13	-0.126233	-3.07737	0.00299611	0.0426656
sp|Q9UII2|ATIF1_HUMAN	ATP5IF1	-0.122278	-3.07771	0.00299307	0.0426656
sp|Q16576|RBBP7_HUMAN	RBBP7	0.0944602	3.07651	0.00300366	0.042723
sp|Q03001-3|DYST-3_HUMAN	DST	0.0804673	3.07564	0.00301137	0.0427826
sp|Q13509|TBB3_HUMAN	TUBB3	-0.0682376	-3.07412	0.00302489	0.0428744
sp|Q7L4I2|RSRC2_HUMAN	RSRC2	0.100304	3.07431	0.00302317	0.0428744
sp|O95139|NDUB6_HUMAN	NDUFB6	-0.136485	-3.07313	0.00303372	0.0429131
sp|Q8NGA1|OR1M1_HUMAN	OR1M1	0.332194	3.0727	0.00303749	0.0429131
sp|Q9Y3Q4|HCN4_HUMAN	HCN4	-0.135523	-3.07262	0.00303822	0.0429131
sp|Q14683|SMC1A_HUMAN	SMC1A	0.171036	3.07215	0.00304244	0.0429228
sp|O95167|NDUA3_HUMAN	NDUFA3	-0.162622	-3.07024	0.00305959	0.0430647
sp|Q5VU43|MYOME_HUMAN	PDE4DIP	0.0995082	3.07025	0.00305954	0.0430647
sp|Q9BXQ6|T121B_HUMAN	TMEM121B	-0.235208	-3.06975	0.00306397	0.0430764
sp|O60518|RNBP6_HUMAN	RANBP6	-0.0875047	-3.06666	0.00309191	0.0433567
sp|Q15075|EEA1_HUMAN	EEA1	-0.0594435	-3.06663	0.00309226	0.0433567
sp|Q5VU43-11|MYOME-11_HUMAN	PDE4DIP	0.22763	3.06598	0.00309818	0.0433567
sp|Q8NFP9|NBEA_HUMAN	NBEA	-0.0780069	-3.06605	0.00309746	0.0433567
sp|Q9Y2H0-1|DLGP4-1_HUMAN	DLGAP4	-0.0960979	-3.06544	0.00310303	0.0433746
sp|O75369-8|FLNB-8_HUMAN	FLNB	0.245868	3.06289	0.00312637	0.0435184
sp|O76074|PDE5A_HUMAN	PDE5A	0.166482	3.06313	0.00312415	0.0435184
sp|O95758|PTBP3_HUMAN	PTBP3	0.192326	3.06275	0.00312765	0.0435184
tr|K7ELJ5|K7ELJ5_HUMAN	CBARP	-0.214026	-3.06379	0.00311814	0.0435184
sp|P28827|PTPRM_HUMAN	PTPRM	0.0991628	3.0614	0.00314007	0.0435416
sp|Q8IWZ6|BBS7_HUMAN	BBS7	0.125563	3.06155	0.00313868	0.0435416
tr|A0A087WVQ9|A0A087WVQ9_HUMAN	EEF1A1	0.104869	3.06147	0.00313946	0.0435416
sp|Q13308|PTK7_HUMAN	PTK7	0.149239	3.05888	0.00316335	0.0437147
sp|Q9Y6N5|SQOR_HUMAN	SQOR	0.230287	3.05929	0.00315959	0.0437147
tr|C9JTM0|C9JTM0_HUMAN	ADD2	-0.0945766	-3.05902	0.00316208	0.0437147
sp|P14854|CX6B1_HUMAN	COX6B1	-0.131504	-3.05727	0.00317838	0.0438065
sp|Q4G0S7|CC152_HUMAN	CCDC152	-0.207303	-3.05701	0.00318082	0.0438065
sp|Q8IWZ3|ANKH1_HUMAN	ANKHD1	0.0867701	3.05712	0.0031798	0.0438065
sp|Q9NUJ3|T11L1_HUMAN	TCP11L1	-0.0715963	-3.05548	0.00319512	0.0439538
sp|P41252|SYIC_HUMAN	IARS	-0.0813527	-3.05116	0.00323583	0.0444577
tr|F8W785|F8W785_HUMAN	GOLIM4	0.18525	3.05081	0.00323908	0.0444577
sp|P41208|CETN2_HUMAN	CETN2	0.154896	3.04986	0.00324816	0.044477
sp|Q9BRK0-2|REEP2-2_HUMAN	REEP2	-0.125046	-3.04951	0.00325147	0.044477
sp|Q9UK76|JUPI1_HUMAN	JPT1	-0.15014	-3.04967	0.00324992	0.044477
sp|Q9BZD3|GCOM2_HUMAN	GCOM2	0.103532	3.04896	0.0032567	0.0444985
sp|O15357|SHIP2_HUMAN	INPPL1	0.107988	3.04765	0.00326922	0.0446169
sp|O43290|SNUT1_HUMAN	SART1	0.0872796	3.04561	0.00328876	0.0446169
sp|P04271|S100B_HUMAN	S100B	0.309186	3.04577	0.00328727	0.0446169
sp|P17707|DCAM_HUMAN	AMD1	0.233138	3.04615	0.00328363	0.0446169
sp|P23497|SP100_HUMAN	SP100	0.197818	3.047	0.00327543	0.0446169
sp|Q4G0N4|NAKD2_HUMAN	NADK2	0.106241	3.04565	0.00328839	0.0446169
sp|Q8N9R8|SCAI_HUMAN	SCAI	-0.140063	-3.04537	0.00329108	0.0446169
tr|A0A087WVC2|A0A087WVC2_HUMAN	ANK3	-0.105656	-3.0442	0.00330239	0.0447203
sp|O75369|FLNB_HUMAN	FLNB	0.243432	3.04333	0.00331076	0.044734
sp|Q2NKX8|ERC6L_HUMAN	ERCC6L	0.264693	3.04358	0.00330836	0.044734
sp|P49916|DNLI3_HUMAN	LIG3	0.0948437	3.04291	0.00331491	0.0447403
tr|A0A1W2PRB0|A0A1W2PRB0_HUMAN	KCNMA1	-0.10679	-3.04062	0.00333717	0.0449906
sp|Q9H2L5|RASF4_HUMAN	RASSF4	0.176049	3.04011	0.00334214	0.0450078
sp|P06737|PYGL_HUMAN	PYGL	0.147181	3.03864	0.00335647	0.0451227
sp|P51798|CLCN7_HUMAN	CLCN7	0.0839884	3.03734	0.00336925	0.0451227
sp|Q8TEQ0|SNX29_HUMAN	SNX29	0.113322	3.03755	0.00336718	0.0451227
sp|Q9Y287|ITM2B_HUMAN	ITM2B	0.15779	3.038	0.0033628	0.0451227
tr|A0A1W2PRD8|A0A1W2PRD8_HUMAN	KCNH1	-0.16661	-3.03786	0.00336412	0.0451227
sp|P13284|GILT_HUMAN	IFI30	0.267962	3.03577	0.00338476	0.0451314
sp|P29350|PTN6_HUMAN	PTPN6	0.191479	3.03603	0.00338219	0.0451314
sp|Q8NC44|RETR2_HUMAN	RETREG2	-0.123934	-3.0367	0.00337553	0.0451314
sp|Q96ID5|IGS21_HUMAN	IGSF21	-0.119433	-3.03613	0.0033812	0.0451314
sp|P26232|CTNA2_HUMAN	CTNNA2	0.0887657	3.03486	0.00339379	0.0452021
sp|P47736|RPGP1_HUMAN	RAP1GAP	-0.091524	-3.03389	0.00340337	0.0452801
sp|O43715|TRIA1_HUMAN	TRIAP1	-0.12788	-3.03293	0.00341295	0.0453579
sp|O43432|IF4G3_HUMAN	EIF4G3	-0.088348	-3.03197	0.00342251	0.0453899
sp|Q93084|AT2A3_HUMAN	ATP2A3	-0.101238	-3.03194	0.00342283	0.0453899
sp|Q6PUV4|CPLX2_HUMAN	CPLX2	-0.183039	-3.03108	0.00343145	0.0454194
tr|A0A0A0MSA7|A0A0A0MSA7_HUMAN	EIF4G3	-0.0884486	-3.03097	0.00343253	0.0454194
sp|Q9UPP5-2|K1107-2_HUMAN	KIAA1107	-0.169953	-3.02921	0.00345014	0.045553
tr|F8W6G1|F8W6G1_HUMAN	NRBP1	-0.107076	-3.02951	0.00344714	0.045553
sp|O95292|VAPB_HUMAN	VAPB	-0.0912705	-3.02857	0.0034566	0.0455729
sp|P18084|ITB5_HUMAN	ITGB5	0.169403	3.02832	0.00345915	0.0455729
sp|Q13464|ROCK1_HUMAN	ROCK1	0.102415	3.02586	0.003484	0.0458265
sp|Q6ZN16|M3K15_HUMAN	MAP3K15	0.106241	3.02567	0.00348594	0.0458265
sp|P27824|CALX_HUMAN	CANX	0.0973192	3.0234	0.00350913	0.0460056
sp|Q8TF42|UBS3B_HUMAN	UBASH3B	-0.086883	-3.02322	0.00351093	0.0460056
sp|Q9BWU0|NADAP_HUMAN	SLC4A1AP	0.0905509	3.02378	0.00350524	0.0460056
sp|O00154|BACH_HUMAN	ACOT7	-0.0837179	-3.02009	0.00354303	0.0461509
sp|P31937|3HIDH_HUMAN	HIBADH	0.103946	3.02128	0.0035308	0.0461509
sp|P63010|AP2B1_HUMAN	AP2B1	-0.0897431	-3.02167	0.00352676	0.0461509
sp|Q9BPW8|NIPS1_HUMAN	NIPSNAP1	-0.0899268	-3.02091	0.00353461	0.0461509
tr|A0A0D9SGG3|A0A0D9SGG3_HUMAN	KCNQ2	-0.109889	-3.02056	0.00353818	0.0461509
tr|A0A0J9YW26|A0A0J9YW26_HUMAN	EPB41L3	-0.160437	-3.01992	0.00354481	0.0461509
sp|Q96AY4|TTC28_HUMAN	TTC28	0.119509	3.01946	0.00354961	0.0461639
sp|Q8WUA2|PPIL4_HUMAN	PPIL4	0.0851036	3.01867	0.00355771	0.0462198
sp|Q14982|OPCM_HUMAN	OPCML	-0.126953	-3.01817	0.00356289	0.0462377
sp|P68104|EF1A1_HUMAN	EEF1A1	0.0954861	3.01484	0.00359763	0.0464543
sp|Q00610|CLH1_HUMAN	CLTC	-0.0940727	-3.01473	0.0035987	0.0464543
sp|Q9UPN3|MACF1_HUMAN	MACF1	0.0739455	3.01572	0.00358836	0.0464543
sp|Q9Y6M7-10|S4A7-10_HUMAN	SLC4A7	-0.178268	-3.01569	0.00358877	0.0464543
tr|A0A1W2PSF4|A0A1W2PSF4_HUMAN	GABRG2	-0.140298	-3.01542	0.00359158	0.0464543
sp|O14514|AGRB1_HUMAN	ADGRB1	-0.123931	-3.01301	0.00361682	0.0466385
sp|P01903|DRA_HUMAN	HLA-DRA	0.38199	3.01256	0.00362148	0.0466473
sp|Q15528|MED22_HUMAN	MED22	0.160439	3.01221	0.00362518	0.0466473
sp|Q8TDY4|ASAP3_HUMAN	ASAP3	0.184884	3.01029	0.00364548	0.0468288
sp|Q9BQI5-4|SGIP1-4_HUMAN	SGIP1	-0.11139	-3.00906	0.00365856	0.0468288
sp|Q9HCC0|MCCB_HUMAN	MCCC2	0.0786549	3.00959	0.00365291	0.0468288
sp|Q9UDR5|AASS_HUMAN	AASS	0.216177	3.01009	0.00364757	0.0468288
tr|I3L2B0|I3L2B0_HUMAN	CLUH	-0.0544651	-3.00923	0.00365667	0.0468288
sp|O00461|GOLI4_HUMAN	GOLIM4	0.182268	3.00709	0.00367956	0.0469767
sp|Q9BY77|PDIP3_HUMAN	POLDIP3	0.101999	3.00696	0.0036809	0.0469767
tr|H3BUF6|H3BUF6_HUMAN	ATXN2L	-0.0832603	-3.00688	0.00368172	0.0469767
sp|P12318|FCG2A_HUMAN	FCGR2A	0.266137	3.00529	0.00369874	0.0470557
sp|Q16531|DDB1_HUMAN	DDB1	-0.0672828	-3.00522	0.00369953	0.0470557
sp|Q9H6U6-7|BCAS3-7_HUMAN	BCAS3	-0.0804315	-3.00555	0.00369601	0.0470557
sp|P18206|VINC_HUMAN	VCL	0.247953	3.00399	0.00371281	0.0471259
tr|C9J4A7|C9J4A7_HUMAN	NA	0.182565	3.00409	0.00371168	0.0471259
sp|Q9Y6I3|EPN1_HUMAN	EPN1	-0.117774	-3.00342	0.0037189	0.047154
sp|P09960|LKHA4_HUMAN	LTA4H	0.101762	3.0026	0.00372773	0.0471838
sp|P50135|HNMT_HUMAN	HNMT	0.366441	3.00177	0.0037368	0.0471838
sp|P51808|DYLT3_HUMAN	DYNLT3	-0.0975364	-3.002	0.0037343	0.0471838
sp|Q8IZQ5|SELH_HUMAN	SELENOH	0.135963	3.00187	0.00373564	0.0471838
tr|H0YBI4|H0YBI4_HUMAN	PDLIM5	0.19563	3.00006	0.00375528	0.0473681
sp|P49840|GSK3A_HUMAN	GSK3A	-0.0927106	-2.99919	0.00376477	0.0474384
tr|A0A075B6E5|A0A075B6E5_HUMAN	ENAH	0.126144	2.99767	0.0037814	0.0475986
sp|Q8TEW0-10|PARD3-10_HUMAN	PARD3	0.147592	2.99593	0.00380051	0.0476764
sp|Q96DG6|CMBL_HUMAN	CMBL	0.154692	2.99626	0.00379694	0.0476764
sp|Q9Y5X3|SNX5_HUMAN	SNX5	0.0904502	2.99568	0.00380328	0.0476764
tr|J3KNE7|J3KNE7_HUMAN	TPD52L1	0.151428	2.99662	0.00379299	0.0476764
sp|Q86YS7-2|C2CD5-2_HUMAN	C2CD5	-0.0948695	-2.9947	0.00381405	0.0477261
tr|A0A1B0GUL6|A0A1B0GUL6_HUMAN	BTBD8	-0.161745	-2.99461	0.0038151	0.0477261
sp|Q9UPP5|K1107_HUMAN	KIAA1107	-0.165361	-2.99361	0.00382614	0.0478149
sp|Q6ZMZ3|SYNE3_HUMAN	SYNE3	0.125827	2.99316	0.00383115	0.0478284
sp|Q15036|SNX17_HUMAN	SNX17	0.0884501	2.99079	0.00385746	0.0480606
tr|A0A2R8Y4T1|A0A2R8Y4T1_HUMAN	TNS1	0.162806	2.99077	0.00385767	0.0480606
sp|P48729-3|KC1A-3_HUMAN	CSNK1A1	0.10726	2.99017	0.00386437	0.0480948
sp|O14617-2|AP3D1-2_HUMAN	AP3D1	-0.100455	-2.98965	0.00387027	0.0481188
sp|Q10567-3|AP1B1-3_HUMAN	AP1B1	-0.082502	-2.98814	0.00388715	0.0481318
sp|Q684P5|RPGP2_HUMAN	RAP1GAP2	-0.116278	-2.98904	0.00387705	0.0481318
sp|Q9UHF0|TKNK_HUMAN	TAC3	0.302453	2.98834	0.00388491	0.0481318
tr|A0A3B3IU55|A0A3B3IU55_HUMAN	STON2	0.227257	2.98881	0.0038797	0.0481318
sp|Q9H2M9|RBGPR_HUMAN	RAB3GAP2	-0.0715491	-2.98767	0.00389243	0.0481481
sp|P78369|CLD10_HUMAN	CLDN10	0.326901	2.98673	0.00390304	0.0482301
sp|Q8NBI5|S43A3_HUMAN	SLC43A3	0.242091	2.98598	0.00391154	0.0482861
sp|Q8N7H5|PAF1_HUMAN	PAF1	0.10719	2.9855	0.00391692	0.0483033
sp|O43347|MSI1H_HUMAN	MSI1	0.180453	2.98331	0.00394183	0.0483446
sp|P06748-2|NPM-2_HUMAN	NPM1	0.0915875	2.9834	0.00394077	0.0483446
sp|Q13976|KGP1_HUMAN	PRKG1	0.223505	2.98374	0.00393688	0.0483446
sp|Q7Z422|SZRD1_HUMAN	SZRD1	0.10576	2.98311	0.00394414	0.0483446
sp|Q8TF74|WIPF2_HUMAN	WIPF2	-0.0857034	-2.98347	0.00393994	0.0483446
sp|Q9NZM3|ITSN2_HUMAN	ITSN2	-0.0850361	-2.98311	0.00394412	0.0483446
sp|Q8IUS5|EPHX4_HUMAN	EPHX4	-0.191451	-2.98119	0.003966	0.0484782
sp|Q9ULR3|PPM1H_HUMAN	PPM1H	-0.111419	-2.98134	0.00396427	0.0484782
tr|H3BQG3|H3BQG3_HUMAN	PDPR	0.13631	2.9811	0.00396702	0.0484782
sp|Q9Y5K6|CD2AP_HUMAN	CD2AP	0.176574	2.97921	0.00398878	0.0486951
sp|Q9Y4W6|AFG32_HUMAN	AFG3L2	-0.103607	-2.97862	0.00399556	0.048729
tr|A0A0B4J269|A0A0B4J269_HUMAN	NA	-0.0664532	-2.97823	0.00400001	0.0487343
sp|Q8N485|LIX1_HUMAN	LIX1	0.23342	2.97761	0.00400723	0.0487734
sp|Q8IWE2|NXP20_HUMAN	FAM114A1	0.209838	2.97691	0.00401532	0.0488229
tr|H7BZC2|H7BZC2_HUMAN	SYNJ1	-0.11919	-2.97651	0.00401999	0.0488309
sp|P32456|GBP2_HUMAN	GBP2	0.327337	2.97365	0.00405325	0.0491857
sp|P42262-3|GRIA2-3_HUMAN	GRIA2	-0.147327	-2.97138	0.00407986	0.0492135
sp|Q15628|TRADD_HUMAN	TRADD	0.16409	2.97161	0.00407709	0.0492135
sp|Q8NI08|NCOA7_HUMAN	NCOA7	-0.0797468	-2.97232	0.00406885	0.0492135
sp|Q8TER5|ARH40_HUMAN	ARHGEF40	0.131006	2.97142	0.00407942	0.0492135
sp|Q8WY21|SORC1_HUMAN	SORCS1	-0.113009	-2.97233	0.00406867	0.0492135
sp|Q9HCM3|K1549_HUMAN	KIAA1549	-0.11861	-2.97243	0.0040675	0.0492135
sp|Q86XE5|HOGA1_HUMAN	HOGA1	0.249527	2.97095	0.00408495	0.049226
tr|F8VVT9|F8VVT9_HUMAN	AGAP2	-0.112204	-2.97046	0.00409069	0.0492464
sp|O94855|SC24D_HUMAN	SEC24D	-0.0996617	-2.96942	0.00410295	0.049345
sp|Q16527|CSRP2_HUMAN	CSRP2	0.326895	2.969	0.00410787	0.0493554
sp|Q13976-2|KGP1-2_HUMAN	PRKG1	0.225196	2.96731	0.00412801	0.0495012
sp|Q86VI3|IQGA3_HUMAN	IQGAP3	0.242487	2.96641	0.00413866	0.0495012
sp|Q9H3E2|SNX25_HUMAN	SNX25	-0.0991646	-2.96598	0.00414376	0.0495012
sp|Q9HD34|LYRM4_HUMAN	LYRM4	-0.139243	-2.96594	0.00414428	0.0495012
sp|Q9UHY1|NRBP_HUMAN	NRBP1	-0.0951644	-2.96592	0.00414445	0.0495012
sp|Q9Y2T4|2ABG_HUMAN	PPP2R2C	-0.074137	-2.96729	0.0041282	0.0495012
sp|O94804|STK10_HUMAN	STK10	0.118418	2.96277	0.00418226	0.0498339
sp|Q3KQU3-4|MA7D1-4_HUMAN	MAP7D1	-0.0960458	-2.96319	0.00417718	0.0498339
sp|Q8TCA0|LRC20_HUMAN	LRRC20	0.0971658	2.96257	0.00418462	0.0498339
sp|P48751|B3A3_HUMAN	SLC4A3	0.103434	2.96143	0.0041984	0.0499491
sp|Q9ULI1|NWD2_HUMAN	NWD2	-0.148698	-2.96064	0.00420796	0.0500138
sp|O14983|AT2A1_HUMAN	ATP2A1	-0.106758	-2.95977	0.00421841	0.0500372
sp|P40222|TXLNA_HUMAN	TXLNA	0.0688183	2.95945	0.00422229	0.0500372
sp|Q9NZL6|RGL1_HUMAN	RGL1	0.127656	2.95991	0.00421678	0.0500372
sp|Q5SRE5|NU188_HUMAN	NUP188	0.0852751	2.95867	0.00423184	0.0500527
sp|Q9Y6W3|CAN7_HUMAN	CAPN7	0.0950447	2.95896	0.00422827	0.0500527
sp|Q9UBW7|ZMYM2_HUMAN	ZMYM2	0.135627	2.95819	0.00423768	0.050073
sp|Q9BU02|THTPA_HUMAN	THTPA	0.121595	2.95659	0.00425715	0.0501081
sp|Q9NQL2|RRAGD_HUMAN	RRAGD	0.102313	2.95697	0.00425259	0.0501081
sp|Q9NZ45|CISD1_HUMAN	CISD1	-0.107795	-2.95708	0.00425116	0.0501081
tr|K4DIE0|K4DIE0_HUMAN	NUMA1	0.177789	2.95663	0.00425675	0.0501081
sp|O60664|PLIN3_HUMAN	PLIN3	0.266013	2.95517	0.0042746	0.0501971
sp|Q6ZSY5|PPR3F_HUMAN	PPP1R3F	-0.0806379	-2.95524	0.00427378	0.0501971
sp|Q9UBL3|ASH2L_HUMAN	ASH2L	0.104627	2.95496	0.00427711	0.0501971
sp|Q12765|SCRN1_HUMAN	SCRN1	0.0748609	2.95416	0.00428705	0.0502653
sp|P31152|MK04_HUMAN	MAPK4	0.142265	2.95296	0.00430181	0.0503884
sp|Q8WUN7|UBTD2_HUMAN	UBTD2	0.105177	2.95263	0.00430585	0.0503884
sp|O60241-2|AGRB2-2_HUMAN	ADGRB2	-0.0947088	-2.95177	0.0043165	0.0504644
sp|Q9BY42|RTF2_HUMAN	RTFDC1	0.181648	2.95135	0.00432176	0.0504773
sp|Q96FV2|SCRN2_HUMAN	SCRN2	0.186712	2.94694	0.00437669	0.0510698
sp|Q8WX92-2|NELFB-2_HUMAN	NELFB	0.112793	2.94588	0.00439009	0.0511732
sp|Q9H6R3|ACSS3_HUMAN	ACSS3	0.161328	2.94557	0.00439398	0.0511732
tr|F8W9J4|F8W9J4_HUMAN	DST	0.0807778	2.94494	0.00440183	0.0512155
sp|Q93015|NAA80_HUMAN	NAA80	-0.128578	-2.94308	0.00442546	0.0514412
sp|Q8NI08-2|NCOA7-2_HUMAN	NCOA7	-0.0779181	-2.94208	0.0044381	0.0514896
sp|Q8TD30|ALAT2_HUMAN	GPT2	0.160609	2.94227	0.00443562	0.0514896
sp|Q7Z6L0|PRRT2_HUMAN	PRRT2	-0.138958	-2.94138	0.00444697	0.0515433
sp|P48751-3|B3A3-3_HUMAN	SLC4A3	0.101889	2.94059	0.00445711	0.0516116
sp|Q3KQU3|MA7D1_HUMAN	MAP7D1	-0.092655	-2.94008	0.00446362	0.0516377
sp|Q03013|GSTM4_HUMAN	GSTM4	0.278798	2.93952	0.0044707	0.0516446
sp|Q9NQT8|KI13B_HUMAN	KIF13B	0.128158	2.93937	0.00447272	0.0516446
sp|Q8WXE9|STON2_HUMAN	STON2	0.232042	2.9387	0.00448125	0.0516939
sp|P02775|CXCL7_HUMAN	PPBP	0.304023	2.9382	0.0044876	0.0516983
sp|Q7L014|DDX46_HUMAN	DDX46	0.0658794	2.93801	0.00449014	0.0516983
sp|O60749|SNX2_HUMAN	SNX2	0.0548352	2.93579	0.00451872	0.0517926
sp|P04440|DPB1_HUMAN	HLA-DPB1	0.235353	2.93597	0.00451637	0.0517926
sp|P54105|ICLN_HUMAN	CLNS1A	0.125276	2.93539	0.00452391	0.0517926
sp|Q99490|AGAP2_HUMAN	AGAP2	-0.116088	-2.93652	0.00450934	0.0517926
sp|Q9P1A6|DLGP2_HUMAN	DLGAP2	-0.128936	-2.93557	0.00452154	0.0517926
tr|H0YAB0|H0YAB0_HUMAN	LMNA	0.230186	2.93672	0.00450672	0.0517926
tr|A0A1B0GVV9|A0A1B0GVV9_HUMAN	STXBP1	-0.128113	-2.93491	0.00453011	0.0518148
sp|Q5VU97|CAHD1_HUMAN	CACHD1	0.190062	2.93171	0.00457167	0.0522224
sp|Q9HAC8|UBTD1_HUMAN	UBTD1	0.0946087	2.93151	0.00457435	0.0522224
sp|O00429-2|DNM1L-2_HUMAN	DNM1L	-0.0824332	-2.9303	0.00459016	0.0523046
sp|P17480-2|UBF1-2_HUMAN	UBTF	0.115637	2.93062	0.00458597	0.0523046
sp|P48507|GSH0_HUMAN	GCLM	0.149002	2.92988	0.00459563	0.0523179
sp|P49189-3|AL9A1-3_HUMAN	ALDH9A1	0.194356	2.92797	0.0046208	0.052506
sp|Q96IY1|NSL1_HUMAN	NSL1	0.177395	2.92805	0.0046197	0.052506
sp|Q9BXP5-3|SRRT-3_HUMAN	SRRT	0.0836075	2.92738	0.00462857	0.0525451
sp|Q53HC5|KLH26_HUMAN	KLHL26	-0.0755118	-2.92677	0.0046367	0.0525883
sp|A6NKT7|RGPD3_HUMAN	RGPD3	0.0752062	2.92581	0.00464939	0.0526339
sp|Q9H853|TBA4B_HUMAN	TUBA4B	-0.0808146	-2.92608	0.00464576	0.0526339
sp|A6NHR9|SMHD1_HUMAN	SMCHD1	0.0893972	2.92464	0.00466499	0.0527254
sp|Q9UIF9|BAZ2A_HUMAN	BAZ2A	0.258688	2.92455	0.00466616	0.0527254
sp|O60231|DHX16_HUMAN	DHX16	0.102217	2.92189	0.00470168	0.0530281
tr|A0A2R8Y7E2|A0A2R8Y7E2_HUMAN	SPG7	-0.0975211	-2.92205	0.00469948	0.0530281
sp|O95782|AP2A1_HUMAN	AP2A1	-0.0917343	-2.92154	0.00470643	0.0530324
sp|Q96C19|EFHD2_HUMAN	EFHD2	-0.129152	-2.92048	0.00472061	0.0530937
tr|A0A0U1RQK7|A0A0U1RQK7_HUMAN	EIF4G3	-0.0848851	-2.92052	0.00472013	0.0530937
sp|O00299|CLIC1_HUMAN	CLIC1	0.339281	2.92015	0.00472507	0.0530948
sp|P51587|BRCA2_HUMAN	BRCA2	0.166747	2.91916	0.00473843	0.0531466
sp|Q6F5E8-2|CARL2-2_HUMAN	CARMIL2	-0.124851	-2.91935	0.00473588	0.0531466
tr|C9JTK4|C9JTK4_HUMAN	AP2M1	-0.0990765	-2.91853	0.00474687	0.0531921
sp|Q8N8S7|ENAH_HUMAN	ENAH	0.111526	2.91815	0.004752	0.0532004
sp|Q0VF96|CGNL1_HUMAN	CGNL1	0.126202	2.9177	0.00475817	0.0532205
sp|Q9NR22|ANM8_HUMAN	PRMT8	-0.123525	-2.91699	0.00476783	0.0532795
sp|O00429|DNM1L_HUMAN	DNM1L	-0.083798	-2.91499	0.00479508	0.0534868
sp|Q8TB03|CX038_HUMAN	CXorf38	0.168513	2.91498	0.00479518	0.0534868
sp|O95182|NDUA7_HUMAN	NDUFA7	-0.13983	-2.91336	0.00481732	0.053613
sp|P47736-4|RPGP1-4_HUMAN	RAP1GAP	-0.0852866	-2.91286	0.00482416	0.053613
sp|Q12882|DPYD_HUMAN	DPYD	0.227926	2.91371	0.00481248	0.053613
sp|Q9H7F0|AT133_HUMAN	ATP13A3	-0.123049	-2.91294	0.00482314	0.053613
sp|Q9P0M6|H2AW_HUMAN	H2AFY2	0.18067	2.91203	0.00483554	0.0536904
sp|O00629|IMA3_HUMAN	KPNA4	0.0726763	2.91016	0.00486141	0.0538829
sp|P04080|CYTB_HUMAN	CSTB	0.12805	2.90917	0.00487505	0.0538829
sp|P35658-3|NU214-3_HUMAN	NUP214	0.0743859	2.90946	0.00487106	0.0538829
sp|Q9BYN0|SRXN1_HUMAN	SRXN1	0.123364	2.90985	0.00486563	0.0538829
sp|Q9NY65|TBA8_HUMAN	TUBA8	-0.0714946	-2.90928	0.00487359	0.0538829
tr|F8VWL3|F8VWL3_HUMAN	FGD4	0.110938	2.90868	0.00488192	0.0539097
tr|A0A0A0MQS2|A0A0A0MQS2_HUMAN	CLASRP	0.401513	2.90791	0.00489253	0.0539778
sp|Q6T4R5|NHS_HUMAN	NHS	0.121967	2.90756	0.00489747	0.0539832
sp|O15018|PDZD2_HUMAN	PDZD2	-0.0963173	-2.90596	0.00491979	0.0540411
sp|P41586|PACR_HUMAN	ADCYAP1R1	0.209762	2.90575	0.00492277	0.0540411
sp|Q86U44|MTA70_HUMAN	METTL3	0.115774	2.90571	0.0049233	0.0540411
sp|Q8IUQ0|CLVS1_HUMAN	CLVS1	-0.0953983	-2.90546	0.00492676	0.0540411
sp|Q8N4Q1|MIA40_HUMAN	CHCHD4	-0.106976	-2.90476	0.00493654	0.0540411
sp|Q8NFH8|REPS2_HUMAN	REPS2	-0.0759343	-2.90464	0.00493831	0.0540411
sp|Q92973|TNPO1_HUMAN	TNPO1	0.104928	2.90612	0.00491752	0.0540411
sp|Q9H330|TM245_HUMAN	TMEM245	0.0987239	2.90499	0.00493337	0.0540411
sp|Q15388|TOM20_HUMAN	TOMM20	-0.130431	-2.90427	0.00494347	0.0540479
sp|Q8WWY3|PRP31_HUMAN	PRPF31	0.0919089	2.90396	0.00494783	0.0540479
sp|Q8TDC3|BRSK1_HUMAN	BRSK1	-0.092006	-2.90337	0.00495611	0.0540898
sp|Q8N608-3|DPP10-3_HUMAN	DPP10	-0.136921	-2.90281	0.00496397	0.0541268
sp|P24593|IBP5_HUMAN	IGFBP5	0.249322	2.90099	0.00498968	0.0543584
sp|Q9H2X8|I27L2_HUMAN	IFI27L2	0.200828	2.90035	0.00499879	0.0543602
tr|E7ENQ6|E7ENQ6_HUMAN	NA	-0.116973	-2.90054	0.0049961	0.0543602
sp|Q52LD8|RFTN2_HUMAN	RFTN2	0.168864	2.89815	0.00503005	0.0546511
sp|P17174|AATC_HUMAN	GOT1	-0.0976128	-2.89763	0.00503753	0.0546516
sp|P49841-2|GSK3B-2_HUMAN	GSK3B	-0.0933842	-2.89737	0.00504119	0.0546516
sp|Q01433-4|AMPD2-4_HUMAN	AMPD2	0.101174	2.89721	0.00504358	0.0546516
sp|P41732|TSN7_HUMAN	TSPAN7	-0.188503	-2.89674	0.00505019	0.0546744
sp|P00387|NB5R3_HUMAN	CYB5R3	0.121684	2.89604	0.00506032	0.0547111
tr|Q5JS79|Q5JS79_HUMAN	CASK	0.0739661	2.89588	0.00506259	0.0547111
sp|P49841|GSK3B_HUMAN	GSK3B	-0.0933479	-2.89522	0.00507201	0.0547642
sp|Q9BXB4|OSB11_HUMAN	OSBPL11	0.133927	2.89435	0.00508463	0.0548293
sp|Q9BYH1|SE6L1_HUMAN	SEZ6L	-0.112868	-2.89418	0.00508707	0.0548293
tr|H7C2U6|H7C2U6_HUMAN	NIPSNAP1	-0.0909302	-2.89369	0.00509408	0.0548563
tr|A0A1B0GTN4|A0A1B0GTN4_HUMAN	DLGAP2	-0.130304	-2.89235	0.00511355	0.0550171
sp|P56524|HDAC4_HUMAN	HDAC4	0.060362	2.88947	0.00515533	0.0552904
sp|Q16602|CALRL_HUMAN	CALCRL	0.213999	2.88907	0.00516127	0.0552904
sp|Q6F5E8|CARL2_HUMAN	CARMIL2	-0.121484	-2.88988	0.00514939	0.0552904
sp|Q96JE9|MAP6_HUMAN	MAP6	-0.0785592	-2.88904	0.00516172	0.0552904
sp|Q9NTI5|PDS5B_HUMAN	PDS5B	0.095488	2.88998	0.00514797	0.0552904
sp|Q15554|TERF2_HUMAN	TERF2	0.102376	2.88765	0.00518199	0.0553681
sp|Q9Y5J6|T10B_HUMAN	TIMM10B	-0.0960855	-2.88761	0.00518264	0.0553681
tr|A0A0A0MSA4|A0A0A0MSA4_HUMAN	EPB41L3	-0.136902	-2.88813	0.00517491	0.0553681
sp|P23786|CPT2_HUMAN	CPT2	0.150608	2.8861	0.00520478	0.055533
tr|E9PLW2|E9PLW2_HUMAN	OXR1	-0.133803	-2.88593	0.00520722	0.055533
sp|P19320|VCAM1_HUMAN	VCAM1	0.325181	2.88561	0.00521199	0.0555352
sp|Q96M96|FGD4_HUMAN	FGD4	0.108874	2.88505	0.00522026	0.0555745
sp|O14490-3|DLGP1-3_HUMAN	DLGAP1	-0.13814	-2.88408	0.00523454	0.0555818
sp|O15439|MRP4_HUMAN	ABCC4	0.222435	2.88426	0.00523195	0.0555818
tr|H0YI72|H0YI72_HUMAN	ANKS1B	-0.144495	-2.88408	0.00523467	0.0555818
sp|Q2LD37|K1109_HUMAN	KIAA1109	0.0542817	2.88342	0.00524432	0.0556356
sp|O94925-3|GLSK-3_HUMAN	GLS	-0.124881	-2.88202	0.00526524	0.0557115
sp|Q8NC96|NECP1_HUMAN	NECAP1	-0.127199	-2.88232	0.00526076	0.0557115
sp|Q92619|HMHA1_HUMAN	ARHGAP45	0.135179	2.88252	0.00525775	0.0557115
sp|P48431|SOX2_HUMAN	SOX2	0.196496	2.88109	0.00527904	0.055809
sp|Q99643|C560_HUMAN	SDHC	-0.241239	-2.88033	0.00529042	0.0558806
sp|O95758-4|PTBP3-4_HUMAN	PTBP3	0.181855	2.87813	0.00532331	0.0559362
sp|P02743|SAMP_HUMAN	APCS	0.524237	2.87871	0.00531472	0.0559362
sp|P49903|SPS1_HUMAN	SEPHS1	0.124139	2.87929	0.00530591	0.0559362
sp|Q13137-3|CACO2-3_HUMAN	CALCOCO2	0.175691	2.87885	0.00531256	0.0559362
sp|Q8IX12|CCAR1_HUMAN	CCAR1	0.0770165	2.87856	0.00531685	0.0559362
sp|Q93052|LPP_HUMAN	LPP	0.206161	2.8784	0.00531937	0.0559362
sp|Q8WWM7|ATX2L_HUMAN	ATXN2L	-0.0786217	-2.8778	0.00532833	0.0559406
sp|P78536|ADA17_HUMAN	ADAM17	0.136033	2.87725	0.00533658	0.0559788
sp|O95990|F107A_HUMAN	FAM107A	0.319827	2.87669	0.00534505	0.0560193
sp|Q86UP2|KTN1_HUMAN	KTN1	0.107426	2.87613	0.00535358	0.0560603
sp|Q86UK0|ABCAC_HUMAN	ABCA12	0.247067	2.87536	0.00536515	0.0561331
sp|Q8N608-2|DPP10-2_HUMAN	DPP10	-0.134614	-2.87493	0.00537164	0.0561526
sp|Q5VU43-13|MYOME-13_HUMAN	PDE4DIP	0.0835997	2.87326	0.00539712	0.056322
sp|Q8N2M8|CLASR_HUMAN	CLASRP	0.392593	2.87333	0.00539601	0.056322
sp|O95169|NDUB8_HUMAN	NDUFB8	-0.126499	-2.87258	0.00540741	0.056381
sp|P12107|COBA1_HUMAN	COL11A1	0.536217	2.87154	0.00542327	0.0564084
sp|P60981|DEST_HUMAN	DSTN	-0.0838981	-2.87207	0.00541515	0.0564084
sp|Q86VP3|PACS2_HUMAN	PACS2	0.0833531	2.87124	0.00542796	0.0564084
sp|Q96LB3|IFT74_HUMAN	IFT74	0.129951	2.87119	0.00542861	0.0564084
sp|Q9BRK4|LZTS2_HUMAN	LZTS2	0.0834831	2.87001	0.00544679	0.0565489
sp|Q9NUP1|BL1S4_HUMAN	BLOC1S4	0.122499	2.86874	0.00546638	0.0567038
sp|Q8WVM7|STAG1_HUMAN	STAG1	0.122264	2.86838	0.00547178	0.0567114
sp|O96000|NDUBA_HUMAN	NDUFB10	-0.113031	-2.86701	0.00549306	0.0567321
sp|Q14137|BOP1_HUMAN	BOP1	0.13859	2.86733	0.00548806	0.0567321
sp|Q4G0X9|CCD40_HUMAN	CCDC40	0.192029	2.86785	0.00547999	0.0567321
sp|Q96ST3|SIN3A_HUMAN	SIN3A	0.0745974	2.86674	0.00549714	0.0567321
sp|Q9H1H9|KI13A_HUMAN	KIF13A	0.111071	2.86729	0.00548872	0.0567321
sp|Q13137|CACO2_HUMAN	CALCOCO2	0.17518	2.8647	0.00552896	0.0569025
sp|Q7Z6G8-2|ANS1B-2_HUMAN	ANKS1B	-0.15365	-2.86448	0.00553238	0.0569025
sp|Q9H3Q1|BORG4_HUMAN	CDC42EP4	0.251923	2.86468	0.00552918	0.0569025
tr|A0A1B0GU37|A0A1B0GU37_HUMAN	PRRT2	-0.17194	-2.86535	0.00551879	0.0569025
sp|Q6UXI9|NPNT_HUMAN	NPNT	0.242277	2.8634	0.00554917	0.0570268
sp|Q00577|PURA_HUMAN	PURA	-0.0828496	-2.86291	0.00555675	0.0570565
sp|P55345|ANM2_HUMAN	PRMT2	0.171765	2.8625	0.00556322	0.0570747
tr|A0A096LP52|A0A096LP52_HUMAN	STXBP1	-0.1238	-2.86177	0.00557464	0.0571436
sp|P11413|G6PD_HUMAN	G6PD	0.114768	2.86085	0.00558917	0.0572442
sp|P24557|THAS_HUMAN	TBXAS1	0.209688	2.85973	0.00560675	0.0572794
sp|P35222|CTNB1_HUMAN	CTNNB1	0.0755946	2.85979	0.00560584	0.0572794
tr|A0A1B0GV05|A0A1B0GV05_HUMAN	RAP1GAP2	-0.108959	-2.85975	0.00560652	0.0572794
sp|Q9Y3B9|RRP15_HUMAN	RRP15	0.169686	2.85767	0.00563928	0.0575633
tr|A0A2R8YE50|A0A2R8YE50_HUMAN	PRKG1	0.214025	2.85652	0.00565763	0.0577021
sp|Q15042-3|RB3GP-3_HUMAN	RAB3GAP1	-0.0642715	-2.85478	0.0056853	0.0579357
sp|P14927|QCR7_HUMAN	UQCRB	-0.131997	-2.85433	0.00569258	0.0579612
sp|Q9NX14|NDUBB_HUMAN	NDUFB11	-0.122624	-2.85354	0.00570515	0.057992
sp|Q9Y5H5|PCDA9_HUMAN	PCDHA9	-0.136383	-2.85356	0.00570493	0.057992
sp|P36021|MOT8_HUMAN	SLC16A2	0.175697	2.85278	0.00571735	0.0580189
tr|H0Y742|H0Y742_HUMAN	SUN1	0.0895802	2.85305	0.00571299	0.0580189
sp|Q9Y2J2-4|E41L3-4_HUMAN	EPB41L3	-0.142096	-2.85187	0.00573197	0.0581188
sp|Q96PZ7|CSMD1_HUMAN	CSMD1	-0.0735034	-2.85014	0.00576001	0.0583543
sp|O95199|RCBT2_HUMAN	RCBTB2	0.192068	2.84952	0.00577	0.0584069
sp|Q15052|ARHG6_HUMAN	ARHGEF6	0.072095	2.84853	0.00578606	0.0585206
sp|Q16881|TRXR1_HUMAN	TXNRD1	0.0892495	2.84785	0.00579711	0.0585836
sp|Q92765|SFRP3_HUMAN	FRZB	0.306336	2.84698	0.00581124	0.0586498
sp|Q9NVD7|PARVA_HUMAN	PARVA	0.207381	2.8467	0.00581584	0.0586498
sp|Q9P258|RCC2_HUMAN	RCC2	0.129291	2.84596	0.0058278	0.0586498
sp|Q9Y5L3|ENTP2_HUMAN	ENTPD2	0.245505	2.84651	0.00581896	0.0586498
tr|H7BZ50|H7BZ50_HUMAN	MZT2B	0.189177	2.84614	0.00582501	0.0586498
sp|Q9Y243|AKT3_HUMAN	AKT3	-0.0848601	-2.84402	0.00585963	0.0589213
sp|Q8N608|DPP10_HUMAN	DPP10	-0.133442	-2.84343	0.00586937	0.0589705
sp|Q9H254-3|SPTN4-3_HUMAN	SPTBN4	-0.0822517	-2.84237	0.00588689	0.0590975
sp|O43741|AAKB2_HUMAN	PRKAB2	0.0983388	2.84152	0.0059009	0.0591823
sp|P49354|FNTA_HUMAN	FNTA	0.147782	2.84127	0.00590507	0.0591823
sp|O00154-5|BACH-5_HUMAN	ACOT7	-0.0832139	-2.83874	0.00594696	0.0592014
sp|O14907|TX1B3_HUMAN	TAX1BP3	0.223969	2.83897	0.00594311	0.0592014
sp|O43526|KCNQ2_HUMAN	KCNQ2	-0.0945155	-2.83968	0.00593129	0.0592014
sp|P30519|HMOX2_HUMAN	HMOX2	-0.063642	-2.83894	0.00594362	0.0592014
sp|Q13951-2|PEBB-2_HUMAN	CBFB	0.14603	2.83879	0.00594625	0.0592014
sp|Q14832|GRM3_HUMAN	GRM3	-0.104789	-2.83912	0.00594076	0.0592014
sp|Q5T5Y3|CAMP1_HUMAN	CAMSAP1	-0.0649406	-2.84039	0.00591965	0.0592014
sp|Q6S8J3|POTEE_HUMAN	POTEE	0.0618854	2.84019	0.00592283	0.0592014
sp|Q8IVH8-3|M4K3-3_HUMAN	MAP4K3	-0.0760532	-2.83851	0.00595084	0.0592014
sp|Q96N16|JKIP1_HUMAN	JAKMIP1	-0.0818923	-2.83809	0.00595786	0.0592227
sp|O15514|RPB4_HUMAN	POLR2D	0.13438	2.83693	0.00597722	0.0592342
sp|O95749|GGPPS_HUMAN	GGPS1	0.128474	2.83604	0.00599219	0.0592342
sp|P14867|GBRA1_HUMAN	GABRA1	-0.177465	-2.83534	0.00600394	0.0592342
sp|P49189|AL9A1_HUMAN	ALDH9A1	0.182019	2.83524	0.00600561	0.0592342
sp|P51687|SUOX_HUMAN	SUOX	-0.0889397	-2.83619	0.00598955	0.0592342
sp|Q15413|RYR3_HUMAN	RYR3	-0.080744	-2.83511	0.00600779	0.0592342
sp|Q8IVH8|M4K3_HUMAN	MAP4K3	-0.0761267	-2.83558	0.00599981	0.0592342
sp|Q8NBS9|TXND5_HUMAN	TXNDC5	0.109168	2.83567	0.00599836	0.0592342
sp|Q8TEZ7|PAQR8_HUMAN	PAQR8	0.22707	2.83534	0.00600392	0.0592342
sp|Q92610|ZN592_HUMAN	ZNF592	0.329106	2.83706	0.00597507	0.0592342
sp|Q9NY65-2|TBA8-2_HUMAN	TUBA8	-0.0718935	-2.83456	0.00601691	0.0592761
sp|Q9Y3C8|UFC1_HUMAN	UFC1	0.113228	2.83421	0.00602285	0.0592866
sp|P07195|LDHB_HUMAN	LDHB	0.0766171	2.83287	0.00604556	0.0594116
sp|P11413-3|G6PD-3_HUMAN	G6PD	0.114231	2.83252	0.00605144	0.0594116
sp|Q9H4B7|TBB1_HUMAN	TUBB1	-0.0761715	-2.8323	0.00605512	0.0594116
sp|Q9Y570|PPME1_HUMAN	PPME1	-0.0674598	-2.8324	0.00605342	0.0594116
sp|Q9UBC2|EP15R_HUMAN	EPS15L1	-0.0481367	-2.83179	0.00606373	0.0594481
sp|P62633-4|CNBP-4_HUMAN	CNBP	-0.16183	-2.83091	0.00607865	0.0595462
sp|Q06136|KDSR_HUMAN	KDSR	0.137334	2.83032	0.0060888	0.0595976
sp|Q99424|ACOX2_HUMAN	ACOX2	0.140568	2.8296	0.006101	0.059669
sp|Q08495|DEMA_HUMAN	DMTN	-0.105105	-2.82848	0.00612006	0.0597591
tr|E9PJY4|E9PJY4_HUMAN	NPEPPS	0.095148	2.8285	0.00611985	0.0597591
sp|P28161|GSTM2_HUMAN	GSTM2	0.194589	2.82791	0.00612984	0.0597851
sp|P35270|SPRE_HUMAN	SPR	0.258017	2.82775	0.00613256	0.0597851
sp|A5PLK6|RGSL_HUMAN	RGSL1	0.259083	2.82697	0.00614601	0.0598277
sp|P50897|PPT1_HUMAN	PPT1	0.121833	2.82692	0.00614679	0.0598277
sp|Q8WXD9|CSKI1_HUMAN	CASKIN1	-0.112708	-2.82528	0.00617504	0.0600066
tr|X6R456|X6R456_HUMAN	TTBK1	-0.0801405	-2.82544	0.00617234	0.0600066
sp|Q16585|SGCB_HUMAN	SGCB	0.161904	2.82486	0.00618235	0.0600296
tr|H0YLM8|H0YLM8_HUMAN	DMXL2	-0.119965	-2.82425	0.00619288	0.0600838
sp|P10176|COX8A_HUMAN	COX8A	-0.153586	-2.82291	0.00621603	0.0602528
sp|P28330|ACADL_HUMAN	ACADL	0.391271	2.82234	0.00622598	0.0602528
sp|P80723|BASP1_HUMAN	BASP1	-0.120797	-2.8221	0.00623014	0.0602528
sp|Q7Z6G8|ANS1B_HUMAN	ANKS1B	-0.117722	-2.82267	0.00622023	0.0602528
sp|Q15223|NECT1_HUMAN	NECTIN1	-0.108218	-2.82006	0.00626566	0.0604147
sp|Q16348|S15A2_HUMAN	SLC15A2	0.146541	2.82	0.00626677	0.0604147
sp|Q5T848|GP158_HUMAN	GPR158	-0.135993	-2.82055	0.00625706	0.0604147
sp|Q9NUQ7|UFSP2_HUMAN	UFSP2	0.135487	2.82007	0.00626548	0.0604147
sp|P41586-2|PACR-2_HUMAN	ADCYAP1R1	0.216129	2.81718	0.00631619	0.0607946
sp|Q96IJ6|GMPPA_HUMAN	GMPPA	0.108747	2.81726	0.00631486	0.0607946
sp|O75494-3|SRS10-3_HUMAN	SRSF10	0.0888442	2.81628	0.00633207	0.0608853
sp|P49758-11|RGS6-11_HUMAN	RGS6	-0.14429	-2.81576	0.00634128	0.0608853
sp|P49758|RGS6_HUMAN	RGS6	-0.14429	-2.81576	0.00634128	0.0608853
sp|P78559|MAP1A_HUMAN	MAP1A	-0.10075	-2.81494	0.00635569	0.0608853
sp|Q86YS7-5|C2CD5-5_HUMAN	C2CD5	-0.0921171	-2.81544	0.00634691	0.0608853
sp|Q8WXX5|DNJC9_HUMAN	DNAJC9	0.158063	2.81503	0.00635415	0.0608853
sp|P49802-2|RGS7-2_HUMAN	RGS7	-0.119985	-2.81333	0.00638425	0.0611107
sp|Q9BQ16|TICN3_HUMAN	SPOCK3	0.198275	2.81276	0.00639451	0.0611607
sp|Q969T9|WBP2_HUMAN	WBP2	-0.125249	-2.81163	0.00641465	0.0613051
sp|O75569|PRKRA_HUMAN	PRKRA	-0.103062	-2.81027	0.00643885	0.0614353
sp|Q96CW1|AP2M1_HUMAN	AP2M1	-0.088096	-2.81002	0.00644345	0.0614353
tr|A0A1B0GW23|A0A1B0GW23_HUMAN	ABHD14A-ACY1	0.13135	2.81032	0.00643792	0.0614353
sp|Q9NX62|IMPA3_HUMAN	IMPAD1	-0.133372	-2.80912	0.00645955	0.0615405
sp|P31146|COR1A_HUMAN	CORO1A	-0.144378	-2.80653	0.00650631	0.0617736
sp|Q5T011|SZT2_HUMAN	SZT2	0.0696222	2.80635	0.00650945	0.0617736
sp|Q9NXE4|NSMA3_HUMAN	SMPD4	0.0945161	2.80648	0.00650706	0.0617736
sp|Q9P000-2|COMD9-2_HUMAN	COMMD9	0.0852446	2.80643	0.00650804	0.0617736
tr|A0A2R8Y445|A0A2R8Y445_HUMAN	NA	0.068219	2.80674	0.00650237	0.0617736
sp|O43172|PRP4_HUMAN	PRPF4	0.0882204	2.80247	0.00658	0.0620554
sp|P20674|COX5A_HUMAN	COX5A	-0.114005	-2.8033	0.00656497	0.0620554
sp|P53794|SC5A3_HUMAN	SLC5A3	0.225894	2.80443	0.00654431	0.0620554
sp|Q15569|TESK1_HUMAN	TESK1	0.143971	2.80336	0.0065637	0.0620554
sp|Q658P3-2|STEA3-2_HUMAN	STEAP3	0.372991	2.80254	0.00657872	0.0620554
sp|Q658P3|STEA3_HUMAN	STEAP3	0.372991	2.80254	0.00657872	0.0620554
sp|Q96AG3|S2546_HUMAN	SLC25A46	-0.115619	-2.80366	0.00655828	0.0620554
tr|Q5JSD2|Q5JSD2_HUMAN	VDAC2	-0.100559	-2.8029	0.00657226	0.0620554
sp|Q9NVS2|RT18A_HUMAN	MRPS18A	-0.093119	-2.80216	0.00658578	0.0620616
sp|P11766|ADHX_HUMAN	ADH5	0.183191	2.80186	0.00659112	0.0620639
sp|P49768|PSN1_HUMAN	PSEN1	0.156162	2.7998	0.00662891	0.062288
sp|P61764|STXB1_HUMAN	STXBP1	-0.139928	-2.79973	0.00663031	0.062288
sp|Q9HBI1|PARVB_HUMAN	PARVB	0.169736	2.80015	0.00662261	0.062288
sp|O14490-2|DLGP1-2_HUMAN	DLGAP1	-0.139927	-2.79819	0.00665872	0.062341
sp|Q15287|RNPS1_HUMAN	RNPS1	0.11854	2.79837	0.00665541	0.062341
sp|Q96EP0|RNF31_HUMAN	RNF31	0.054641	2.79792	0.00666363	0.062341
sp|Q96T37|RBM15_HUMAN	RBM15	0.0675864	2.79853	0.00665234	0.062341
sp|Q9Y2W1|TR150_HUMAN	THRAP3	0.0784691	2.79814	0.00665962	0.062341
tr|A0A1B0GW14|A0A1B0GW14_HUMAN	KCNQ2	-0.090853	-2.79775	0.00666675	0.062341
sp|O14576-2|DC1I1-2_HUMAN	DYNC1I1	-0.0931871	-2.79656	0.00668893	0.0625004
sp|Q6NUN0|ACSM5_HUMAN	ACSM5	0.240184	2.79489	0.00671986	0.062741
tr|E7EUI8|E7EUI8_HUMAN	G6PD	0.112576	2.7943	0.00673098	0.0627966
sp|Q16658|FSCN1_HUMAN	FSCN1	-0.0884381	-2.79395	0.00673748	0.062809
sp|O14576|DC1I1_HUMAN	DYNC1I1	-0.0929872	-2.79324	0.00675068	0.0628357
sp|Q9UPA5|BSN_HUMAN	BSN	-0.129723	-2.79331	0.00674938	0.0628357
sp|Q13049|TRI32_HUMAN	TRIM32	-0.0691381	-2.7916	0.00678153	0.0630706
sp|Q96ES7|SGF29_HUMAN	SGF29	0.158894	2.79134	0.00678631	0.0630706
sp|O95571|ETHE1_HUMAN	ETHE1	0.127915	2.7906	0.00680028	0.0631521
tr|H3BNA6|H3BNA6_HUMAN	SYNGR3	-0.197313	-2.78969	0.00681742	0.0632629
sp|Q9BXR0|TGT_HUMAN	QTRT1	0.0992931	2.78922	0.00682625	0.0632965
sp|O14974|MYPT1_HUMAN	PPP1R12A	-0.0657712	-2.78651	0.00687782	0.0634545
sp|P04920|B3A2_HUMAN	SLC4A2	0.141104	2.78612	0.00688508	0.0634545
sp|P16284|PECA1_HUMAN	PECAM1	0.166302	2.78693	0.00686973	0.0634545
sp|P19404|NDUV2_HUMAN	NDUFV2	-0.113936	-2.7868	0.00687219	0.0634545
sp|P35240|MERL_HUMAN	NF2	0.0847487	2.78631	0.00688163	0.0634545
sp|P78344|IF4G2_HUMAN	EIF4G2	0.0621395	2.78715	0.0068656	0.0634545
sp|Q15417|CNN3_HUMAN	CNN3	0.223513	2.78656	0.00687675	0.0634545
sp|Q9BQ04|RBM4B_HUMAN	RBM4B	0.0837374	2.78803	0.00684888	0.0634545
sp|O60664-3|PLIN3-3_HUMAN	PLIN3	0.25558	2.78584	0.00689045	0.0634559
sp|Q70Z35|PREX2_HUMAN	PREX2	0.100223	2.78553	0.00689638	0.0634624
sp|Q15418|KS6A1_HUMAN	RPS6KA1	0.106431	2.78522	0.00690241	0.0634698
sp|Q9NVH0|EXD2_HUMAN	EXD2	0.088232	2.78479	0.00691051	0.0634962
tr|E9PGC8|E9PGC8_HUMAN	MAP1A	-0.0994662	-2.78311	0.00694282	0.0637448
sp|Q15642|CIP4_HUMAN	TRIP10	0.173799	2.77901	0.00702192	0.0642277
sp|Q9BTT6|LRRC1_HUMAN	LRRC1	0.132849	2.77909	0.00702027	0.0642277
sp|Q9H0U3|MAGT1_HUMAN	MAGT1	0.125934	2.77877	0.00702649	0.0642277
sp|Q9Y2J2|E41L3_HUMAN	EPB41L3	-0.139449	-2.7788	0.00702587	0.0642277
sp|Q9Y5S9-2|RBM8A-2_HUMAN	RBM8A	0.0968192	2.77874	0.00702713	0.0642277
tr|E9PN54|E9PN54_HUMAN	EPB41L2	0.180854	2.77962	0.00701	0.0642277
sp|Q9NZU7|CABP1_HUMAN	CABP1	-0.184193	-2.77816	0.00703828	0.0642812
sp|P55285|CADH6_HUMAN	CDH6	-0.0819188	-2.77762	0.00704888	0.0642874
sp|Q13404|UB2V1_HUMAN	UBE2V1	-0.0422954	-2.77759	0.00704954	0.0642874
sp|A0AVT1-4|UBA6-4_HUMAN	UBA6	0.113039	2.77577	0.00708506	0.0643216
sp|O75746|CMC1_HUMAN	SLC25A12	-0.165175	-2.77624	0.00707588	0.0643216
sp|P05026|AT1B1_HUMAN	ATP1B1	-0.108763	-2.7765	0.00707066	0.0643216
sp|Q96LR2|LURA1_HUMAN	LURAP1	-0.110908	-2.77603	0.00707999	0.0643216
sp|Q9NU63|ZFP57_HUMAN	ZFP57	-0.179665	-2.77642	0.0070723	0.0643216
tr|A0A0D9SF10|A0A0D9SF10_HUMAN	KCNQ2	-0.0979066	-2.77661	0.00706864	0.0643216
sp|Q92854|SEM4D_HUMAN	SEMA4D	-0.109804	-2.77541	0.00709197	0.0643362
sp|P34741|SDC2_HUMAN	SDC2	0.222005	2.77372	0.00712523	0.0645897
sp|O43175|SERA_HUMAN	PHGDH	0.227668	2.77314	0.00713651	0.0645994
tr|K7EKQ2|K7EKQ2_HUMAN	CDC37	-0.078407	-2.77312	0.00713694	0.0645994
sp|Q96CD0|FBXL8_HUMAN	FBXL8	0.134275	2.77223	0.00715459	0.064711
sp|Q9GZQ3|COMD5_HUMAN	COMMD5	0.113275	2.77196	0.00715994	0.0647112
tr|A0A087X255|A0A087X255_HUMAN	MID1	0.124964	2.77154	0.00716825	0.0647381
sp|P31431|SDC4_HUMAN	SDC4	0.197375	2.77033	0.00719207	0.0649049
sp|Q9BQE3|TBA1C_HUMAN	TUBA1C	-0.0700619	-2.76853	0.00722799	0.0651612
tr|H0Y7S5|H0Y7S5_HUMAN	SHANK2	-0.12623	-2.76837	0.00723119	0.0651612
sp|Q9NRQ2|PLS4_HUMAN	PLSCR4	0.277745	2.76676	0.00726331	0.0653537
sp|Q9UK61|TASOR_HUMAN	FAM208A	0.106353	2.76677	0.00726301	0.0653537
sp|A8MUU1|FB5L3_HUMAN	FABP5P3	0.322643	2.76509	0.00729673	0.0656057
sp|P16284-4|PECA1-4_HUMAN	PECAM1	0.175714	2.7648	0.00730257	0.0656097
sp|P61619|S61A1_HUMAN	SEC61A1	0.0986829	2.76344	0.00732999	0.0658074
sp|O14818|PSA7_HUMAN	PSMA7	0.0591126	2.76316	0.00733559	0.065809
sp|Q8IZR5-2|CKLF4-2_HUMAN	CMTM4	0.153973	2.76177	0.00736376	0.066013
sp|Q8IUW5|RELL1_HUMAN	RELL1	0.2213	2.76147	0.00736987	0.0660191
sp|Q14194-2|DPYL1-2_HUMAN	CRMP1	-0.0637678	-2.7597	0.00740571	0.0662671
tr|H7C0T9|H7C0T9_HUMAN	NCKIPSD	-0.140881	-2.75957	0.00740847	0.0662671
sp|O43150|ASAP2_HUMAN	ASAP2	-0.0816642	-2.75807	0.0074391	0.0664348
sp|Q8IZR5|CKLF4_HUMAN	CMTM4	0.158953	2.75822	0.00743607	0.0664348
tr|A0A0G2JLW6|A0A0G2JLW6_HUMAN	DLGAP2	-0.131915	-2.75785	0.00744363	0.0664348
sp|P05413|FABPH_HUMAN	FABP3	-0.110926	-2.75569	0.00748792	0.0664612
sp|P10114|RAP2A_HUMAN	RAP2A	-0.0996755	-2.75561	0.00748963	0.0664612
sp|P17066|HSP76_HUMAN	HSPA6	0.0772666	2.75641	0.00747303	0.0664612
sp|Q86UT6|NLRX1_HUMAN	NLRX1	0.0982373	2.75731	0.00745458	0.0664612
sp|Q86XX4|FRAS1_HUMAN	FRAS1	0.178768	2.75557	0.00749036	0.0664612
sp|Q92616|GCN1_HUMAN	GCN1	0.0728605	2.75665	0.00746809	0.0664612
sp|Q96A49|SYAP1_HUMAN	SYAP1	-0.0836732	-2.75601	0.00748139	0.0664612
sp|Q9NZ52|GGA3_HUMAN	GGA3	-0.0808893	-2.75572	0.00748737	0.0664612
sp|Q6YN16|HSDL2_HUMAN	HSDL2	0.1054	2.75284	0.00754667	0.066912
sp|Q8N257|H2B3B_HUMAN	HIST3H2BB	0.211356	2.75152	0.00757408	0.067106
sp|P02545|LMNA_HUMAN	LMNA	0.207225	2.74996	0.00760662	0.0672467
sp|P55289|CAD12_HUMAN	CDH12	-0.135089	-2.75031	0.0075994	0.0672467
sp|Q5FWE3|PRRT3_HUMAN	PRRT3	-0.106002	-2.74953	0.00761565	0.0672467
sp|Q7Z2W4-3|ZCCHV-3_HUMAN	ZC3HAV1	0.149933	2.74943	0.00761764	0.0672467
tr|J3KS89|J3KS89_HUMAN	ACADVL	0.184882	2.75007	0.00760431	0.0672467
sp|Q07157|ZO1_HUMAN	TJP1	0.121904	2.74835	0.00764037	0.0673984
sp|Q14195-2|DPYL3-2_HUMAN	DPYSL3	0.0896515	2.74753	0.00765758	0.0674488
sp|Q6UXI9-6|NPNT-6_HUMAN	NPNT	0.212316	2.74728	0.00766275	0.0674488
sp|Q96AT9|RPE_HUMAN	RPE	0.198697	2.74745	0.00765919	0.0674488
sp|Q9H0C8|ILKAP_HUMAN	ILKAP	0.0974044	2.74654	0.00767836	0.0675373
sp|P08574|CY1_HUMAN	CYC1	-0.113158	-2.7451	0.0077087	0.0676572
sp|Q9H3G5|CPVL_HUMAN	CPVL	0.243916	2.74555	0.00769915	0.0676572
sp|Q9UHR5|S30BP_HUMAN	SAP30BP	0.125368	2.74521	0.00770635	0.0676572
sp|P27482|CALL3_HUMAN	CALML3	-0.0750759	-2.74476	0.00771583	0.067663
sp|P35241|RADI_HUMAN	RDX	0.201636	2.74404	0.00773106	0.067663
sp|Q8N5S9|KKCC1_HUMAN	CAMKK1	-0.0974493	-2.74412	0.00772956	0.067663
sp|Q8TC07|TBC15_HUMAN	TBC1D15	0.0780261	2.74402	0.00773164	0.067663
sp|P31949|S10AB_HUMAN	S100A11	0.298835	2.74272	0.00775925	0.0676896
sp|P32455|GBP1_HUMAN	GBP1	0.328095	2.74294	0.00775446	0.0676896
sp|Q96JA1|LRIG1_HUMAN	LRIG1	0.133355	2.74299	0.0077535	0.0676896
sp|Q9P000|COMD9_HUMAN	COMMD9	0.0756196	2.7426	0.00776172	0.0676896
sp|Q9Y314|NOSIP_HUMAN	NOSIP	0.121538	2.74256	0.00776254	0.0676896
sp|P16220|CREB1_HUMAN	CREB1	0.13762	2.74163	0.00778238	0.0678139
sp|Q8WUH1|CHUR_HUMAN	CHURC1	0.0998216	2.73994	0.00781852	0.0679825
sp|Q9Y6D5|BIG2_HUMAN	ARFGEF2	-0.0801928	-2.74033	0.00781016	0.0679825
tr|A0A2R8YFN5|A0A2R8YFN5_HUMAN	CASK	0.0628004	2.74003	0.00781649	0.0679825
sp|Q9H1H9-3|KI13A-3_HUMAN	KIF13A	0.0959009	2.73849	0.00784968	0.0681558
tr|B4E171|B4E171_HUMAN	NA	-0.177967	-2.73858	0.00784765	0.0681558
sp|Q6ZV73|FGD6_HUMAN	FGD6	0.194225	2.73803	0.00785946	0.068192
sp|Q13614|MTMR2_HUMAN	MTMR2	-0.0842721	-2.73751	0.00787073	0.0682279
tr|A0A3B3ITX4|A0A3B3ITX4_HUMAN	NA	-0.0891797	-2.73732	0.00787483	0.0682279
sp|Q9GZR7|DDX24_HUMAN	DDX24	0.108972	2.73662	0.0078898	0.0683089
tr|A0A087X1A9|A0A087X1A9_HUMAN	SEC22B	0.0805458	2.73579	0.0079079	0.0684169
sp|Q92854-2|SEM4D-2_HUMAN	SEMA4D	-0.0827102	-2.73508	0.00792307	0.0684993
sp|Q96RY7|IF140_HUMAN	IFT140	0.0848775	2.73474	0.00793047	0.0685145
sp|Q5EG05|CAR16_HUMAN	CARD16	0.211928	2.73431	0.00793988	0.0685471
sp|Q765P7|MTSSL_HUMAN	MTSS1L	0.130434	2.73382	0.00795053	0.0685903
sp|P28799-3|GRN-3_HUMAN	GRN	0.173874	2.73267	0.00797559	0.0687467
sp|Q96MT3|PRIC1_HUMAN	PRICKLE1	-0.10573	-2.73231	0.00798348	0.0687467
sp|Q9NVN8|GNL3L_HUMAN	GNL3L	-0.177861	-2.73221	0.00798565	0.0687467
sp|Q86XI2|CNDG2_HUMAN	NCAPG2	0.262361	2.73154	0.00800022	0.0688235
sp|Q7Z434|MAVS_HUMAN	MAVS	0.153901	2.73081	0.00801611	0.0689113
sp|P25490|TYY1_HUMAN	YY1	0.10077	2.72943	0.00804644	0.0690778
sp|P30622|CLIP1_HUMAN	CLIP1	0.055534	2.72941	0.00804685	0.0690778
sp|Q12851|M4K2_HUMAN	MAP4K2	-0.0849959	-2.72888	0.00805849	0.0690923
sp|Q96T58|MINT_HUMAN	SPEN	0.0708784	2.72882	0.00805991	0.0690923
sp|P42262|GRIA2_HUMAN	GRIA2	-0.136089	-2.72795	0.008079	0.0692071
sp|Q9NYL2|M3K20_HUMAN	MAP3K20	0.206015	2.72666	0.00810762	0.0694033
sp|Q96DE0-3|NUD16-3_HUMAN	NUDT16	0.114431	2.72611	0.00811966	0.0694574
sp|Q30167|2B1A_HUMAN	HLA-DRB1	0.343228	2.72582	0.00812616	0.0694641
tr|H7C0I9|H7C0I9_HUMAN	KALRN	-0.0948606	-2.72554	0.00813249	0.0694693
sp|O60641-3|AP180-3_HUMAN	SNAP91	-0.0960431	-2.7244	0.00815774	0.0695249
sp|P49916-2|DNLI3-2_HUMAN	LIG3	0.0801057	2.72421	0.00816189	0.0695249
sp|Q96I24|FUBP3_HUMAN	FUBP3	0.122512	2.72444	0.00815694	0.0695249
sp|Q9NRA2|S17A5_HUMAN	SLC17A5	0.135006	2.72424	0.00816119	0.0695249
tr|H7C417|H7C417_HUMAN	NA	0.117919	2.72384	0.00817016	0.0695466
sp|Q8NEH6|MNS1_HUMAN	MNS1	0.160305	2.72257	0.00819846	0.0697385
sp|P68366|TBA4A_HUMAN	TUBA4A	-0.0753835	-2.7223	0.0082047	0.0697428
sp|Q7KZN9|COX15_HUMAN	COX15	0.0911797	2.72172	0.00821764	0.0697748
tr|D6RED7|D6RED7_HUMAN	RPS3A	-0.103107	-2.72161	0.00821996	0.0697748
sp|P19474|RO52_HUMAN	TRIM21	0.169216	2.7206	0.00824266	0.0698699
sp|Q6NV74|K121L_HUMAN	KIAA1211L	-0.116215	-2.72068	0.00824086	0.0698699
sp|O95232|LC7L3_HUMAN	LUC7L3	0.098147	2.71883	0.00828262	0.0700619
sp|P11166|GTR1_HUMAN	SLC2A1	-0.104752	-2.71911	0.00827622	0.0700619
tr|A0A0C4DGN7|A0A0C4DGN7_HUMAN	FDXR	0.142043	2.71908	0.00827703	0.0700619
sp|O60308|CE104_HUMAN	CEP104	0.185698	2.71771	0.00830785	0.0701968
sp|P0DP58|LYNX1_HUMAN	LYNX1	-0.293632	-2.71738	0.00831534	0.0701968
tr|A0A0U1RRM6|A0A0U1RRM6_HUMAN	ENAH	0.107442	2.71736	0.0083159	0.0701968
sp|P31948|STIP1_HUMAN	STIP1	0.0679337	2.71654	0.00833434	0.0703036
sp|O14490-4|DLGP1-4_HUMAN	DLGAP1	-0.133753	-2.71616	0.00834302	0.070328
sp|P48651|PTSS1_HUMAN	PTDSS1	-0.176811	-2.71457	0.00837911	0.0704855
sp|Q8N370|LAT4_HUMAN	SLC43A2	-0.176386	-2.7148	0.00837405	0.0704855
sp|Q9UBC2-2|EP15R-2_HUMAN	EPS15L1	-0.0466889	-2.71472	0.00837583	0.0704855
sp|Q8TE04|PANK1_HUMAN	PANK1	-0.099565	-2.71398	0.00839277	0.0705516
sp|O75427|LRCH4_HUMAN	LRCH4	0.103145	2.71327	0.00840897	0.07059
tr|M0R2L2|M0R2L2_HUMAN	TBC1D17	-0.0632577	-2.71346	0.00840462	0.07059
sp|P51812|KS6A3_HUMAN	RPS6KA3	0.0640761	2.71293	0.00841667	0.0706055
sp|Q9NZ01|TECR_HUMAN	TECR	0.0978904	2.71268	0.00842244	0.0706055
sp|Q8IY67-2|RAVR1-2_HUMAN	RAVER1	0.121783	2.71225	0.00843234	0.0706398
sp|P62633|CNBP_HUMAN	CNBP	-0.142818	-2.71181	0.00844246	0.0706758
sp|O00230|CORT_HUMAN	CORT	-0.204051	-2.71095	0.00846223	0.0707438
sp|Q13347|EIF3I_HUMAN	EIF3I	0.0678604	2.71105	0.00845983	0.0707438
sp|Q86XE3|MICU3_HUMAN	MICU3	-0.103747	-2.70745	0.00854313	0.071371
tr|D6RC77|D6RC77_HUMAN	PGM3	0.166416	2.70647	0.00856574	0.0715107
sp|Q9BZ19|ANR60_HUMAN	ANKRD60	-0.137938	-2.70558	0.00858663	0.0716278
sp|Q9NTX5|ECHD1_HUMAN	ECHDC1	0.138732	2.70537	0.00859157	0.0716278
sp|Q14192|FHL2_HUMAN	FHL2	-0.121848	-2.70383	0.00862746	0.071876
sp|Q86WG5|MTMRD_HUMAN	SBF2	0.101877	2.70359	0.00863317	0.071876
sp|Q53GL7|PAR10_HUMAN	PARP10	0.125482	2.70232	0.00866301	0.0719961
sp|Q5TAX3|TUT4_HUMAN	TUT4	0.2845	2.70256	0.00865734	0.0719961
tr|C9J8Y3|C9J8Y3_HUMAN	ICA1	-0.133297	-2.70222	0.00866537	0.0719961
sp|Q5TC84|OGRL1_HUMAN	OGFRL1	0.15424	2.7014	0.00868465	0.0720577
tr|X6R8W7|X6R8W7_HUMAN	RAP1GAP	-0.0846536	-2.70146	0.00868311	0.0720577
sp|Q9H1U9|S2551_HUMAN	SLC25A51	-0.0884195	-2.70077	0.00869939	0.0721307
sp|O60641|AP180_HUMAN	SNAP91	-0.0989983	-2.70047	0.00870649	0.0721321
sp|Q01658|NC2B_HUMAN	DR1	0.156049	2.70026	0.00871143	0.0721321
sp|P62760|VISL1_HUMAN	VSNL1	-0.134956	-2.69924	0.00873568	0.0722836
tr|A0A0U1RRD1|A0A0U1RRD1_HUMAN	2023-09-07	-0.149384	-2.69839	0.00875583	0.072401
sp|Q9NQZ5|STAR7_HUMAN	STARD7	0.122524	2.69787	0.00876821	0.0724541
sp|Q8N135|LGI4_HUMAN	LGI4	0.127182	2.69714	0.00878546	0.0725472
sp|Q99719-2|SEPT5-2_HUMAN	2023-09-05	-0.135677	-2.69664	0.00879753	0.0725975
sp|Q8NE35|CPEB3_HUMAN	CPEB3	-0.0944342	-2.69499	0.00883694	0.0728732
sp|Q9NP77|SSU72_HUMAN	SSU72	0.0711402	2.69465	0.0088451	0.0728911
sp|P18507|GBRG2_HUMAN	GABRG2	-0.119301	-2.69309	0.00888245	0.0731492
sp|O60341|KDM1A_HUMAN	KDM1A	0.0857539	2.69247	0.00889732	0.073222
sp|Q9Y2K5|R3HD2_HUMAN	R3HDM2	-0.129895	-2.69193	0.00891032	0.0732794
sp|P26378|ELAV4_HUMAN	ELAVL4	-0.144224	-2.68932	0.00897359	0.0737498
sp|Q8IZJ1|UNC5B_HUMAN	UNC5B	0.153798	2.68854	0.00899258	0.0738114
sp|Q8WUM0|NU133_HUMAN	NUP133	0.0799865	2.68846	0.00899438	0.0738114
tr|F5GY40|F5GY40_HUMAN	NDUFA9	-0.119573	-2.68826	0.00899932	0.0738114
sp|Q6P6C2|ALKB5_HUMAN	ALKBH5	0.108591	2.68796	0.00900654	0.0738208
sp|O75150|BRE1B_HUMAN	RNF40	0.0628624	2.68673	0.00903658	0.0739174
sp|Q93079|H2B1H_HUMAN	HIST1H2BH	0.19272	2.68721	0.0090249	0.0739174
sp|Q9H2D1|MFTC_HUMAN	SLC25A32	-0.149091	-2.6868	0.009035	0.0739174
sp|O75094|SLIT3_HUMAN	SLIT3	0.0947465	2.68612	0.00905159	0.0739903
sp|O14617-5|AP3D1-5_HUMAN	AP3D1	-0.0938416	-2.68569	0.00906207	0.0740262
sp|P15954|COX7C_HUMAN	COX7C	-0.139644	-2.68506	0.00907759	0.0740668
sp|P52597|HNRPF_HUMAN	HNRNPF	0.121312	2.68499	0.00907924	0.0740668
sp|P13762|DRB4_HUMAN	HLA-DRB4	0.300682	2.68395	0.0091047	0.0741252
sp|Q14314|FGL2_HUMAN	FGL2	0.292152	2.68404	0.00910262	0.0741252
sp|Q9Y277|VDAC3_HUMAN	VDAC3	-0.0971654	-2.68432	0.00909568	0.0741252
sp|O43581|SYT7_HUMAN	SYT7	-0.107704	-2.68336	0.00911941	0.0741953
sp|O14490-5|DLGP1-5_HUMAN	DLGAP1	-0.138705	-2.68227	0.00914635	0.0742917
sp|Q9UKA9|PTBP2_HUMAN	PTBP2	0.0653447	2.6823	0.00914541	0.0742917
tr|F8VWQ5|F8VWQ5_HUMAN	CS	-0.119155	-2.68213	0.00914962	0.0742917
sp|Q9GZT4|SRR_HUMAN	SRR	0.219968	2.681	0.00917757	0.0744689
sp|Q32P44|EMAL3_HUMAN	EML3	0.140887	2.68005	0.00920114	0.0746103
sp|Q8IYB4-7|PEX5R-7_HUMAN	PEX5L	-0.102459	-2.67896	0.00922824	0.0747801
sp|Q9UN75|PCDAC_HUMAN	PCDHA12	-0.132033	-2.67857	0.00923803	0.0748096
sp|P36959|GMPR1_HUMAN	GMPR	0.314239	2.6769	0.0092798	0.0750978
sp|O14617|AP3D1_HUMAN	AP3D1	-0.0933053	-2.67661	0.009287	0.075106
sp|Q08495-4|DEMA-4_HUMAN	DMTN	-0.104491	-2.67543	0.00931662	0.075114
sp|Q16512|PKN1_HUMAN	PKN1	0.127554	2.67597	0.00930303	0.075114
sp|Q8N8S7-2|ENAH-2_HUMAN	ENAH	0.105876	2.67534	0.00931891	0.075114
sp|Q9Y3D0|CIA2B_HUMAN	CIAO2B	0.0972686	2.67594	0.0093039	0.075114
tr|A0A2R8YER1|A0A2R8YER1_HUMAN	CHD4	0.0655051	2.67558	0.00931301	0.075114
sp|Q6ZT12|UBR3_HUMAN	UBR3	-0.0659617	-2.67494	0.00932903	0.0751457
sp|P01116-2|RASK-2_HUMAN	KRAS	-0.0798771	-2.6738	0.0093578	0.0751903
sp|P06733-2|ENOA-2_HUMAN	ENO1	0.0978059	2.67446	0.00934116	0.0751903
sp|Q15834|CC85B_HUMAN	CCDC85B	0.114357	2.67374	0.00935933	0.0751903
sp|Q9UNF1|MAGD2_HUMAN	MAGED2	0.127429	2.67379	0.00935786	0.0751903
sp|Q96A26|F162A_HUMAN	FAM162A	-0.135199	-2.67297	0.0093786	0.0752681
tr|D6RB85|D6RB85_HUMAN	CANX	0.0969392	2.67286	0.0093814	0.0752681
tr|G3V164|G3V164_HUMAN	GRIA4	-0.12725	-2.67227	0.00939638	0.0753385
sp|Q01085|TIAR_HUMAN	TIAL1	0.0607097	2.67037	0.00944452	0.0756074
sp|Q13057|COASY_HUMAN	COASY	0.189269	2.66984	0.00945807	0.0756074
sp|Q8IUF8|RIOX2_HUMAN	RIOX2	0.156625	2.66998	0.00945458	0.0756074
tr|H0YCI7|H0YCI7_HUMAN	VPS26B	0.151866	2.67065	0.00943744	0.0756074
tr|H3BLS9|H3BLS9_HUMAN	ANKHD1	0.0799062	2.66972	0.00946104	0.0756074
sp|Q96RR4|KKCC2_HUMAN	CAMKK2	-0.161897	-2.66875	0.00948589	0.0757561
sp|Q8WXF7|ATLA1_HUMAN	ATL1	-0.090087	-2.66797	0.00950585	0.0758657
sp|P35372-13|OPRM-13_HUMAN	OPRM1	0.4019	2.66722	0.0095251	0.0759498
sp|Q9NQY0|BIN3_HUMAN	BIN3	0.0972023	2.66707	0.0095289	0.0759498
sp|O60840|CAC1F_HUMAN	CACNA1F	-0.161139	-2.66498	0.00958269	0.0762785
tr|E9PHI4|E9PHI4_HUMAN	SUN1	0.0829963	2.66513	0.00957888	0.0762785
sp|P49959|MRE11_HUMAN	MRE11	0.119003	2.66285	0.00963757	0.0766651
sp|Q3SYG4|PTHB1_HUMAN	BBS9	0.113437	2.66222	0.00965413	0.0767354
sp|Q63ZY6|NSN5C_HUMAN	NSUN5P2	0.219083	2.66178	0.00966537	0.0767354
tr|H7C5H5|H7C5H5_HUMAN	MFN1	0.0719208	2.6619	0.00966233	0.0767354
sp|Q9NPH2|INO1_HUMAN	ISYNA1	0.141019	2.66127	0.00967874	0.0767914
sp|O60826|CCD22_HUMAN	CCDC22	0.0613275	2.66038	0.00970179	0.0768253
sp|O95197|RTN3_HUMAN	RTN3	-0.0940185	-2.66034	0.00970307	0.0768253
sp|Q7Z7G0|TARSH_HUMAN	ABI3BP	0.35263	2.66023	0.00970594	0.0768253
sp|Q9Y4D1|DAAM1_HUMAN	DAAM1	0.0807767	2.66013	0.00970832	0.0768253
sp|Q8TDX7|NEK7_HUMAN	NEK7	0.151856	2.65971	0.00971949	0.0768637
sp|P78362-2|SRPK2-2_HUMAN	SRPK2	-0.069092	-2.65924	0.00973178	0.0769109
sp|O94808|GFPT2_HUMAN	GFPT2	0.130592	2.65864	0.00974737	0.0769722
sp|P57103-7|NAC3-7_HUMAN	SLC8A3	-0.0864935	-2.65845	0.00975222	0.0769722
sp|O43752|STX6_HUMAN	STX6	0.0773825	2.6568	0.00979576	0.0770655
sp|Q15139|KPCD1_HUMAN	PRKD1	0.152985	2.65694	0.00979206	0.0770655
sp|Q86TB9|PATL1_HUMAN	PATL1	0.10138	2.65702	0.00978978	0.0770655
sp|Q9H254|SPTN4_HUMAN	SPTBN4	-0.0606209	-2.65753	0.00977659	0.0770655
tr|F5H039|F5H039_HUMAN	GPHN	-0.0617745	-2.65734	0.0097815	0.0770655
tr|U3KQK0|U3KQK0_HUMAN	HIST1H2BN	0.19037	2.65628	0.0098093	0.0771221
sp|P47736-2|RPGP1-2_HUMAN	RAP1GAP	-0.0831552	-2.6554	0.00983254	0.0772548
sp|A6NHL2|TBAL3_HUMAN	TUBAL3	-0.116738	-2.65387	0.00987301	0.0775226
tr|I3L0R7|I3L0R7_HUMAN	ABR	-0.177717	-2.65356	0.00988108	0.0775358
sp|O94874|UFL1_HUMAN	UFL1	0.101429	2.65289	0.009899	0.0775614
sp|Q7Z2W4|ZCCHV_HUMAN	ZC3HAV1	0.149319	2.65255	0.00990788	0.0775614
sp|Q7Z6G8-10|ANS1B-10_HUMAN	ANKS1B	-0.148482	-2.65307	0.00989423	0.0775614
tr|Q4VXP6|Q4VXP6_HUMAN	KCNQ2	-0.0949979	-2.65248	0.00990987	0.0775614
tr|H0Y5B0|H0Y5B0_HUMAN	EPB41L2	0.153875	2.65116	0.00994493	0.0777856
tr|A0A1B0GVQ5|A0A1B0GVQ5_HUMAN	STXBP1	-0.12784	-2.65039	0.00996564	0.0778974
sp|P05455|LA_HUMAN	SSB	0.0851961	2.6496	0.00998672	0.0779619
sp|Q86WK6|AMGO1_HUMAN	AMIGO1	-0.126454	-2.64975	0.0099826	0.0779619
sp|Q7Z460-4|CLAP1-4_HUMAN	CLASP1	-0.0684312	-2.6491	0.0100002	0.0779666
sp|Q96AN5|TM143_HUMAN	TMEM143	-0.0840556	-2.64924	0.00999631	0.0779666
sp|O75882|ATRN_HUMAN	ATRN	-0.0745842	-2.64775	0.0100363	0.0781844
sp|Q9H3M7|TXNIP_HUMAN	TXNIP	0.260252	2.64738	0.0100463	0.0781844
sp|Q9HA64|KT3K_HUMAN	FN3KRP	0.102101	2.64734	0.0100474	0.0781844
sp|Q9BRV8|SIKE1_HUMAN	SIKE1	0.149999	2.64644	0.0100717	0.0783233
sp|Q9C026|TRIM9_HUMAN	TRIM9	-0.0636978	-2.64616	0.0100793	0.0783321
sp|Q92520|FAM3C_HUMAN	FAM3C	-0.118592	-2.64484	0.0101148	0.0785073
tr|A0A1W2PQI5|A0A1W2PQI5_HUMAN	SCN8A	-0.148936	-2.64488	0.0101137	0.0785073
sp|A6NGN9|IGLO5_HUMAN	IGLON5	-0.133369	-2.64343	0.010153	0.0785476
sp|P47870-1|GBRB2-1_HUMAN	GABRB2	-0.126539	-2.64322	0.0101587	0.0785476
sp|Q68CZ2|TENS3_HUMAN	TNS3	0.152191	2.6435	0.0101511	0.0785476
sp|Q86VS8|HOOK3_HUMAN	HOOK3	-0.0498771	-2.64324	0.0101582	0.0785476
sp|Q9UQD0|SCN8A_HUMAN	SCN8A	-0.113058	-2.64391	0.01014	0.0785476
tr|C9J2R5|C9J2R5_HUMAN	LPP	0.227872	2.64353	0.0101503	0.0785476
sp|Q8N3J6|CADM2_HUMAN	CADM2	-0.12425	-2.64244	0.0101801	0.0786627
sp|Q8TAQ2|SMRC2_HUMAN	SMARCC2	0.0661582	2.64145	0.010207	0.07882
tr|A0A2U3TZN6|A0A2U3TZN6_HUMAN	CASK	0.0633357	2.64077	0.0102255	0.0789132
sp|P04632|CPNS1_HUMAN	CAPNS1	0.168446	2.63916	0.0102698	0.0789524
sp|P15313|VATB1_HUMAN	ATP6V1B1	-0.0781211	-2.63897	0.010275	0.0789524
sp|Q15746|MYLK_HUMAN	MYLK	0.201912	2.63998	0.0102471	0.0789524
sp|Q5VVQ6|OTU1_HUMAN	YOD1	-0.0894821	-2.63953	0.0102595	0.0789524
sp|Q92608|DOCK2_HUMAN	DOCK2	0.173293	2.63846	0.0102891	0.0789524
sp|Q99250|SCN2A_HUMAN	SCN2A	-0.0936259	-2.64	0.0102467	0.0789524
sp|Q9NR82-6|KCNQ5-6_HUMAN	KCNQ5	-0.108194	-2.63961	0.0102574	0.0789524
tr|H3BPV0|H3BPV0_HUMAN	MTSS1L	0.141317	2.63851	0.0102875	0.0789524
tr|Q5VVL7|Q5VVL7_HUMAN	DBT	-0.0908796	-2.63883	0.0102787	0.0789524
sp|O95057|DIRA1_HUMAN	DIRAS1	-0.12758	-2.63782	0.0103067	0.0790377
tr|A8MYR7|A8MYR7_HUMAN	DLGAP1	-0.137802	-2.63742	0.0103176	0.0790714
sp|O60828-3|PQBP1-3_HUMAN	PQBP1	0.189919	2.63691	0.0103318	0.0790802
sp|Q53GT1|KLH22_HUMAN	KLHL22	-0.0549655	-2.63696	0.0103304	0.0790802
sp|Q702N8|XIRP1_HUMAN	XIRP1	0.312733	2.63658	0.0103409	0.0790999
sp|O14966|RAB7L_HUMAN	RAB29	0.169258	2.6349	0.0103872	0.0791659
sp|P09382|LEG1_HUMAN	LGALS1	0.159948	2.63552	0.01037	0.0791659
sp|Q13445|TMED1_HUMAN	TMED1	0.128052	2.63485	0.0103886	0.0791659
sp|Q17RD7|SYT16_HUMAN	SYT16	-0.107919	-2.63491	0.010387	0.0791659
sp|Q9Y2Q5|LTOR2_HUMAN	LAMTOR2	0.0963909	2.63545	0.0103721	0.0791659
tr|J3QLN2|J3QLN2_HUMAN	EPN2	-0.193823	-2.63537	0.0103744	0.0791659
sp|P30622-1|CLIP1-1_HUMAN	CLIP1	0.0514921	2.63312	0.0104367	0.0794827
sp|O75044|SRGP2_HUMAN	SRGAP2	-0.056732	-2.63281	0.0104454	0.0794991
sp|P35658|NU214_HUMAN	NUP214	0.0663665	2.6315	0.0104821	0.0797284
sp|P53384|NUBP1_HUMAN	NUBP1	0.135823	2.63006	0.0105222	0.0799835
sp|Q08495-2|DEMA-2_HUMAN	DMTN	-0.0992244	-2.62929	0.0105441	0.0800946
sp|Q70E73|RAPH1_HUMAN	RAPH1	-0.0958247	-2.62908	0.01055	0.0800946
sp|Q9Y4E8|UBP15_HUMAN	USP15	-0.0494559	-2.62825	0.0105734	0.0801716
tr|A0A0U1RQH7|A0A0U1RQH7_HUMAN	RBM39	0.0888148	2.62837	0.0105698	0.0801716
tr|M0QZ18|M0QZ18_HUMAN	ANKRD24	-0.119966	-2.62697	0.0106094	0.0803943
tr|A0A0J9YW31|A0A0J9YW31_HUMAN	EPB41L3	-0.133645	-2.62645	0.0106243	0.0804571
sp|Q8WXS5|CCG8_HUMAN	CACNG8	-0.180071	-2.62461	0.0106764	0.0806582
sp|Q96PK6-5|RBM14-5_HUMAN	RBM14	0.0866431	2.62457	0.0106774	0.0806582
sp|Q9UEE9|CFDP1_HUMAN	CFDP1	0.161291	2.62488	0.0106686	0.0806582
sp|Q9Y2S2|CRYL1_HUMAN	CRYL1	0.188559	2.62464	0.0106755	0.0806582
sp|P17480|UBF1_HUMAN	UBTF	0.104795	2.62406	0.0106921	0.0806766
tr|F8W6A0|F8W6A0_HUMAN	PPHLN1	0.094787	2.62402	0.0106931	0.0806766
sp|P08294|SODE_HUMAN	SOD3	0.219652	2.62377	0.0107002	0.08068
sp|P0CAP2-3|GRL1A-3_HUMAN	POLR2M	0.0713159	2.62267	0.0107316	0.0808665
sp|Q6DKK2|TTC19_HUMAN	TTC19	-0.169799	-2.62128	0.0107715	0.0810662
tr|A0A1B0GU03|A0A1B0GU03_HUMAN	NA	0.0946878	2.62139	0.0107682	0.0810662
sp|O60285|NUAK1_HUMAN	NUAK1	-0.145595	-2.61921	0.010831	0.0811373
sp|P09211|GSTP1_HUMAN	GSTP1	0.169348	2.61963	0.0108189	0.0811373
sp|P17661|DESM_HUMAN	DES	0.278879	2.62048	0.0107943	0.0811373
sp|Q08722|CD47_HUMAN	CD47	-0.111373	-2.61916	0.0108324	0.0811373
sp|Q14721|KCNB1_HUMAN	KCNB1	-0.122256	-2.62044	0.0107956	0.0811373
sp|Q9Y2H0|DLGP4_HUMAN	DLGAP4	-0.0770809	-2.61928	0.010829	0.0811373
sp|Q9Y4E8-2|UBP15-2_HUMAN	USP15	-0.050323	-2.61909	0.0108343	0.0811373
tr|J3QQX3|J3QQX3_HUMAN	FDXR	0.134253	2.61918	0.0108319	0.0811373
tr|K7EQT3|K7EQT3_HUMAN	TUBB6	0.186611	2.6185	0.0108515	0.0812158
sp|Q99567|NUP88_HUMAN	NUP88	0.083302	2.61781	0.0108713	0.0813138
sp|B2RPK0|HGB1A_HUMAN	HMGB1P1	0.165734	2.61747	0.0108812	0.0813213
sp|Q96RR4-7|KKCC2-7_HUMAN	CAMKK2	-0.161936	-2.61732	0.0108857	0.0813213
sp|A1A5D9|BICL2_HUMAN	BICDL2	0.388834	2.61627	0.0109161	0.0813478
sp|O43295-2|SRGP3-2_HUMAN	SRGAP3	-0.0752274	-2.61692	0.0108971	0.0813478
sp|P09668|CATH_HUMAN	CTSH	0.293664	2.61649	0.0109097	0.0813478
sp|P12814-3|ACTN1-3_HUMAN	ACTN1	-0.120519	-2.61572	0.0109321	0.0813478
sp|P41240|CSK_HUMAN	CSK	0.0952483	2.61558	0.0109361	0.0813478
sp|Q13017|RHG05_HUMAN	ARHGAP5	0.0669394	2.61641	0.0109121	0.0813478
sp|Q9BW62|KATL1_HUMAN	KATNAL1	-0.0715422	-2.61563	0.0109345	0.0813478
sp|P36954|RPB9_HUMAN	POLR2I	0.110486	2.61394	0.0109838	0.0814345
sp|Q15436|SC23A_HUMAN	SEC23A	-0.050413	-2.6147	0.0109616	0.0814345
sp|Q16832|DDR2_HUMAN	DDR2	0.119346	2.61457	0.0109655	0.0814345
sp|Q6IQ55|TTBK2_HUMAN	TTBK2	-0.0825352	-2.6138	0.010988	0.0814345
tr|E5RHG9|E5RHG9_HUMAN	UQCRB	-0.121653	-2.61447	0.0109684	0.0814345
tr|X6R3Y6|X6R3Y6_HUMAN	CDH8	-0.142506	-2.61424	0.0109751	0.0814345
tr|A0A0A0MRX1|A0A0A0MRX1_HUMAN	ELAVL2	-0.127288	-2.6128	0.0110172	0.0815516
tr|I3L4Y1|I3L4Y1_HUMAN	ABR	-0.10538	-2.61282	0.0110164	0.0815516
tr|H0YD05|H0YD05_HUMAN	SBF2	0.0936156	2.61048	0.0110851	0.082004
sp|Q17RY0|CPEB4_HUMAN	CPEB4	-0.078881	-2.60928	0.0111206	0.0821383
sp|Q6NUI6|CHADL_HUMAN	CHADL	0.139718	2.60947	0.0111149	0.0821383
tr|B7Z2U2|B7Z2U2_HUMAN	TOM1L2	-0.0875975	-2.60918	0.0111235	0.0821383
sp|P21397|AOFA_HUMAN	MAOA	0.0801048	2.60822	0.0111519	0.082298
sp|Q96K17-3|BT3L4-3_HUMAN	BTF3L4	-0.161478	-2.60697	0.0111888	0.0825201
sp|A1L188|NDUF8_HUMAN	NDUFAF8	-0.160238	-2.60558	0.0112302	0.0825323
sp|O14936|CSKP_HUMAN	CASK	0.0645994	2.60575	0.0112251	0.0825323
sp|Q7Z6L1|TCPR1_HUMAN	TECPR1	-0.0833381	-2.60615	0.0112132	0.0825323
sp|Q9NQX3|GEPH_HUMAN	GPHN	-0.0603028	-2.60594	0.0112196	0.0825323
sp|Q9NUQ2|PLCE_HUMAN	AGPAT5	0.0885452	2.60599	0.0112182	0.0825323
tr|H0YCQ5|H0YCQ5_HUMAN	NPEPPS	0.0718665	2.60555	0.0112312	0.0825323
sp|Q15113|PCOC1_HUMAN	PCOLCE	0.14988	2.60385	0.011282	0.0828161
tr|A0A0G2JH35|A0A0G2JH35_HUMAN	KCNQ2	-0.0847945	-2.6038	0.0112835	0.0828161
sp|O94823|AT10B_HUMAN	ATP10B	-0.144263	-2.60277	0.0113142	0.0829909
sp|P30492|1B54_HUMAN	HLA-B	0.295144	2.60253	0.0113213	0.0829935
sp|P22570|ADRO_HUMAN	FDXR	0.130997	2.60204	0.0113362	0.0830524
sp|O75962|TRIO_HUMAN	TRIO	-0.0671173	-2.6002	0.0113914	0.0832056
sp|O95155|UBE4B_HUMAN	UBE4B	-0.0637404	-2.60002	0.011397	0.0832056
sp|P82970|HMGN5_HUMAN	HMGN5	0.146242	2.60061	0.0113793	0.0832056
sp|Q7Z553|MDGA2_HUMAN	MDGA2	-0.0985973	-2.59998	0.0113982	0.0832056
sp|Q9NX24|NHP2_HUMAN	NHP2	0.125302	2.60012	0.011394	0.0832056
tr|A0A0J9YWE1|A0A0J9YWE1_HUMAN	EPB41L3	-0.141014	-2.60029	0.0113887	0.0832056
sp|P27144|KAD4_HUMAN	AK4	0.100969	2.59876	0.0114351	0.0833749
sp|Q53H82|LACB2_HUMAN	LACTB2	0.119398	2.59889	0.0114312	0.0833749
sp|P10606|COX5B_HUMAN	COX5B	-0.126143	-2.59844	0.0114448	0.0833955
sp|Q9HB21|PKHA1_HUMAN	PLEKHA1	-0.106369	-2.59805	0.0114565	0.0834305
tr|F5GXQ8|F5GXQ8_HUMAN	SYNE1	-0.0926096	-2.59778	0.0114646	0.0834397
sp|P49023|PAXI_HUMAN	PXN	0.153705	2.59661	0.0115004	0.0836502
sp|P35414|APJ_HUMAN	APLNR	0.352938	2.59635	0.0115082	0.0836565
sp|P46940|IQGA1_HUMAN	IQGAP1	0.176851	2.59598	0.0115196	0.0836894
sp|O43252|PAPS1_HUMAN	PAPSS1	0.118236	2.5948	0.0115555	0.083762
sp|Q9BRZ2|TRI56_HUMAN	TRIM56	0.10621	2.59494	0.0115513	0.083762
sp|Q9UPU7|TBD2B_HUMAN	TBC1D2B	0.115465	2.59477	0.0115566	0.083762
tr|A0A1B0GU92|A0A1B0GU92_HUMAN	NA	0.0931999	2.59475	0.0115572	0.083762
sp|Q9UL54|TAOK2_HUMAN	TAOK2	-0.0636209	-2.59441	0.0115674	0.083786
sp|Q86UX7|URP2_HUMAN	FERMT3	0.17278	2.59387	0.011584	0.0838065
sp|Q9NZD8|SPG21_HUMAN	SPG21	0.112548	2.59393	0.0115823	0.0838065
sp|P46952|3HAO_HUMAN	HAAO	0.20995	2.59278	0.0116175	0.0839985
sp|P11182|ODB2_HUMAN	DBT	-0.0851725	-2.59073	0.0116804	0.0844033
sp|P26599|PTBP1_HUMAN	PTBP1	0.182203	2.58988	0.0117068	0.0844986
sp|Q12955-4|ANK3-4_HUMAN	ANK3	-0.0773824	-2.58986	0.0117075	0.0844986
sp|Q9NX05|F120C_HUMAN	FAM120C	0.0816522	2.58922	0.0117272	0.0845904
sp|O14974-4|MYPT1-4_HUMAN	PPP1R12A	-0.0623407	-2.58659	0.011809	0.084678
sp|O15085-2|ARHGB-2_HUMAN	ARHGEF11	-0.054927	-2.58763	0.0117766	0.084678
sp|P49585|PCY1A_HUMAN	PCYT1A	0.0902984	2.58725	0.0117883	0.084678
sp|Q15311|RBP1_HUMAN	RALBP1	-0.0521572	-2.58673	0.0118045	0.084678
sp|Q53FT3|HIKES_HUMAN	HIKESHI	0.116416	2.58855	0.011748	0.084678
sp|Q86V15|CASZ1_HUMAN	CASZ1	0.245839	2.58686	0.0118005	0.084678
sp|Q8IXL7|MSRB3_HUMAN	MSRB3	0.159585	2.58667	0.0118065	0.084678
sp|Q96K17|BT3L4_HUMAN	BTF3L4	-0.0834508	-2.58775	0.0117727	0.084678
sp|Q96T23|RSF1_HUMAN	RSF1	0.0902151	2.58661	0.0118083	0.084678
tr|M0R2C6|M0R2C6_HUMAN	NA	-0.0785055	-2.5879	0.011768	0.084678
sp|P50461|CSRP3_HUMAN	CSRP3	0.277407	2.58635	0.0118164	0.0846804
sp|P80217|IN35_HUMAN	IFI35	0.182452	2.58593	0.0118293	0.0847235
sp|P78362|SRPK2_HUMAN	SRPK2	-0.0666542	-2.58508	0.0118561	0.0848216
sp|Q8NBF2|NHLC2_HUMAN	NHLRC2	0.12739	2.58505	0.011857	0.0848216
sp|O60216|RAD21_HUMAN	RAD21	0.130083	2.58452	0.0118736	0.0848834
sp|P57087|JAM2_HUMAN	JAM2	0.14918	2.58344	0.0119076	0.0848834
sp|Q02978|M2OM_HUMAN	SLC25A11	-0.106525	-2.5836	0.0119024	0.0848834
sp|Q15120|PDK3_HUMAN	PDK3	-0.098748	-2.58428	0.0118811	0.0848834
sp|Q96PE2|ARHGH_HUMAN	ARHGEF17	0.0936603	2.58406	0.0118881	0.0848834
sp|Q9UNX4|WDR3_HUMAN	WDR3	0.0904803	2.58378	0.0118969	0.0848834
sp|Q8IYB4-2|PEX5R-2_HUMAN	PEX5L	-0.0980597	-2.58272	0.0119302	0.0849946
sp|Q5PRF9|SMAG2_HUMAN	SAMD4B	0.0978221	2.58144	0.0119706	0.0851825
sp|Q5T481|RBM20_HUMAN	RBM20	-0.220945	-2.58152	0.011968	0.0851825
sp|P30622-2|CLIP1-2_HUMAN	CLIP1	0.0523936	2.58086	0.0119887	0.0852168
sp|P49619|DGKG_HUMAN	DGKG	0.126742	2.58084	0.0119894	0.0852168
sp|P42702|LIFR_HUMAN	LIFR	0.0989724	2.57936	0.0120363	0.0854501
sp|Q8TD16|BICD2_HUMAN	BICD2	0.0705901	2.5795	0.0120318	0.0854501
sp|Q13162|PRDX4_HUMAN	PRDX4	0.124806	2.57909	0.0120447	0.08546
sp|Q8TAQ2-2|SMRC2-2_HUMAN	SMARCC2	0.0660454	2.57881	0.0120537	0.0854738
sp|O14939|PLD2_HUMAN	PLD2	0.135072	2.57774	0.0120878	0.0856653
sp|O75390|CISY_HUMAN	CS	-0.105887	-2.57688	0.0121151	0.0857659
sp|Q8NAN2|MIGA1_HUMAN	MIGA1	-0.11519	-2.57685	0.0121161	0.0857659
sp|P11172|UMPS_HUMAN	UMPS	0.105192	2.57636	0.0121317	0.0857762
tr|J3QS83|J3QS83_HUMAN	EPB41L3	-0.125627	-2.57649	0.0121275	0.0857762
sp|Q9Y5N5|N6MT1_HUMAN	N6AMT1	0.171528	2.57602	0.0121426	0.0858036
sp|P06733|ENOA_HUMAN	ENO1	0.0942754	2.57567	0.0121536	0.0858313
sp|Q9NSA2|KCND1_HUMAN	KCND1	-0.14284	-2.57542	0.0121617	0.0858386
sp|Q96C90|PP14B_HUMAN	PPP1R14B	0.168155	2.57469	0.0121851	0.085928
tr|A0A087WU36|A0A087WU36_HUMAN	PLXNB2	0.158349	2.57458	0.0121885	0.085928
sp|Q9Y4F5-2|C170B-2_HUMAN	CEP170B	-0.074654	-2.57352	0.0122228	0.0861194
sp|O75937|DNJC8_HUMAN	DNAJC8	0.0854534	2.57101	0.0123037	0.0861896
sp|O95259|KCNH1_HUMAN	KCNH1	-0.125406	-2.57156	0.0122859	0.0861896
sp|P12814-2|ACTN1-2_HUMAN	ACTN1	-0.118269	-2.57132	0.0122937	0.0861896
sp|Q7Z5R6|AB1IP_HUMAN	APBB1IP	0.161996	2.5714	0.012291	0.0861896
sp|Q8NFH8-2|REPS2-2_HUMAN	REPS2	-0.068372	-2.57184	0.0122768	0.0861896
sp|Q9BQ39|DDX50_HUMAN	DDX50	0.0846321	2.57292	0.0122421	0.0861896
sp|Q9BXP5|SRRT_HUMAN	SRRT	0.0761872	2.57114	0.0122995	0.0861896
sp|Q9H1I8|ASCC2_HUMAN	ASCC2	0.107714	2.57158	0.0122852	0.0861896
sp|Q9UL54-2|TAOK2-2_HUMAN	TAOK2	-0.0620181	-2.57165	0.0122829	0.0861896
tr|D6REP5|D6REP5_HUMAN	GRAMD2B	0.193043	2.57122	0.0122968	0.0861896
tr|A0A2R8Y6K2|A0A2R8Y6K2_HUMAN	SPG7	-0.0865934	-2.5706	0.0123168	0.0862321
sp|P45880|VDAC2_HUMAN	VDAC2	-0.0855217	-2.57027	0.0123277	0.0862581
sp|Q9H920|RN121_HUMAN	RNF121	-0.169865	-2.56964	0.012348	0.0863459
sp|Q9Y5B8|NDK7_HUMAN	NME7	0.100752	2.56944	0.0123544	0.0863459
sp|O95470|SGPL1_HUMAN	SGPL1	0.155368	2.56852	0.0123846	0.0865068
sp|O14818-4|PSA7-4_HUMAN	PSMA7	0.0664514	2.56777	0.0124087	0.0865856
sp|Q70J99-3|UN13D-3_HUMAN	UNC13D	0.363597	2.56773	0.0124101	0.0865856
sp|O60359|CCG3_HUMAN	CACNG3	-0.125922	-2.56653	0.0124495	0.0868104
sp|Q6P1J9|CDC73_HUMAN	CDC73	0.0867462	2.56613	0.0124625	0.0868514
tr|A0A0U1RQP1|A0A0U1RQP1_HUMAN	DNM1	-0.0871013	-2.56548	0.0124838	0.0869502
sp|O75781-2|PALM-2_HUMAN	PALM	-0.0792038	-2.56498	0.0125002	0.086971
tr|A0A087WTF3|A0A087WTF3_HUMAN	ANK3	-0.0889072	-2.56495	0.0125011	0.086971
sp|Q32MZ4-4|LRRF1-4_HUMAN	LRRFIP1	-0.0628729	-2.56387	0.0125365	0.0870676
sp|Q8IWQ3|BRSK2_HUMAN	BRSK2	-0.0735221	-2.56424	0.0125243	0.0870676
sp|Q9H307|PININ_HUMAN	PNN	0.0863972	2.56393	0.0125347	0.0870676
sp|Q9NP81|SYSM_HUMAN	SARS2	-0.0769393	-2.56351	0.0125484	0.0871001
sp|P67809|YBOX1_HUMAN	YBX1	0.184929	2.56184	0.0126034	0.0873824
sp|Q13642|FHL1_HUMAN	FHL1	0.175971	2.56194	0.0126001	0.0873824
sp|Q07890|SOS2_HUMAN	SOS2	0.0750433	2.56127	0.0126225	0.0874643
sp|O75477|ERLN1_HUMAN	ERLIN1	0.165443	2.56079	0.0126382	0.0875236
sp|Q9HBT6|CAD20_HUMAN	CDH20	0.135485	2.55988	0.0126685	0.0876833
sp|Q8NI27|THOC2_HUMAN	THOC2	0.0739769	2.55937	0.0126854	0.0877501
sp|Q13423|NNTM_HUMAN	NNT	-0.0862252	-2.55875	0.0127062	0.0878441
sp|Q5JTV8-2|TOIP1-2_HUMAN	TOR1AIP1	0.101498	2.5582	0.0127246	0.0878998
sp|Q8NC24|RELL2_HUMAN	RELL2	-0.200966	-2.55807	0.0127287	0.0878998
sp|Q17RY0-2|CPEB4-2_HUMAN	CPEB4	-0.0776496	-2.55783	0.0127366	0.0879043
sp|P03923|NU6M_HUMAN	MT-ND6	-0.124658	-2.5574	0.012751	0.0879537
sp|Q05086|UBE3A_HUMAN	UBE3A	-0.0549605	-2.55656	0.0127793	0.0880988
sp|O94850|DEND_HUMAN	DDN	-0.113374	-2.55618	0.0127921	0.0881372
sp|O14497|ARI1A_HUMAN	ARID1A	0.0560727	2.5534	0.0128855	0.0886483
sp|P30153|2AAA_HUMAN	PPP2R1A	-0.0508189	-2.55344	0.012884	0.0886483
sp|Q9ULP0|NDRG4_HUMAN	NDRG4	0.0823992	2.55332	0.0128882	0.0886483
sp|Q96P48-1|ARAP1-1_HUMAN	ARAP1	0.0930628	2.5524	0.0129193	0.0888122
sp|Q52LJ0-2|FA98B-2_HUMAN	FAM98B	0.0553307	2.55171	0.0129426	0.0888818
sp|Q9H6U6-3|BCAS3-3_HUMAN	BCAS3	-0.0681901	-2.55166	0.0129441	0.0888818
sp|O75368|SH3L1_HUMAN	SH3BGRL	0.135798	2.55104	0.0129651	0.088976
sp|P54136-2|SYRC-2_HUMAN	RARS	-0.0551545	-2.55028	0.0129909	0.0890323
sp|Q14BN4-3|SLMAP-3_HUMAN	SLMAP	0.0607635	2.54994	0.0130027	0.0890323
sp|Q9HBD1|RC3H2_HUMAN	RC3H2	-0.0983216	-2.55017	0.0129946	0.0890323
sp|Q9P0R6|GSKIP_HUMAN	GSKIP	-0.130887	-2.55005	0.012999	0.0890323
sp|O15127|SCAM2_HUMAN	SCAMP2	0.141136	2.5484	0.0130551	0.0891538
sp|Q06203|PUR1_HUMAN	PPAT	0.0803045	2.54838	0.0130558	0.0891538
sp|Q9UPX8|SHAN2_HUMAN	SHANK2	-0.111515	-2.54813	0.0130644	0.0891538
tr|H0YBX5|H0YBX5_HUMAN	CDK16	-0.1019	-2.54878	0.013042	0.0891538
tr|H0YJ11|H0YJ11_HUMAN	ACTN1	-0.141763	-2.54847	0.0130525	0.0891538
tr|M0R0N0|M0R0N0_HUMAN	NDUFA7	-0.14313	-2.54822	0.0130612	0.0891538
sp|P28482|MK01_HUMAN	MAPK1	0.139504	2.54744	0.013088	0.0892646
sp|P45973|CBX5_HUMAN	CBX5	0.0888466	2.54677	0.0131108	0.0892911
sp|Q13277|STX3_HUMAN	STX3	0.13381	2.547	0.0131028	0.0892911
sp|Q13642-1|FHL1-1_HUMAN	FHL1	0.173374	2.54668	0.013114	0.0892911
sp|Q05193|DYN1_HUMAN	DNM1	-0.0871389	-2.54508	0.0131688	0.0896145
sp|O75131|CPNE3_HUMAN	CPNE3	0.158102	2.54411	0.0132021	0.0896901
sp|P62256|UBE2H_HUMAN	UBE2H	0.085873	2.54453	0.0131877	0.0896901
sp|Q9NTJ4|MA2C1_HUMAN	MAN2C1	0.0889449	2.54413	0.0132015	0.0896901
sp|A1KZ92|PXDNL_HUMAN	PXDNL	0.136635	2.54385	0.0132112	0.0897018
sp|P62937-2|PPIA-2_HUMAN	PPIA	0.0599616	2.54299	0.0132409	0.0898399
tr|H3BLT5|H3BLT5_HUMAN	KIAA1109	0.055333	2.54283	0.0132463	0.0898399
sp|P10768|ESTD_HUMAN	ESD	0.144787	2.54149	0.0132927	0.0899271
sp|P49802|RGS7_HUMAN	RGS7	-0.111213	-2.54126	0.0133009	0.0899271
sp|Q07157-2|ZO1-2_HUMAN	TJP1	0.114127	2.54222	0.0132676	0.0899271
sp|Q5VTE6|ANGE2_HUMAN	ANGEL2	-0.105478	-2.54118	0.0133036	0.0899271
sp|Q7L2J0|MEPCE_HUMAN	MEPCE	0.125225	2.54178	0.0132827	0.0899271
tr|C9J9C1|C9J9C1_HUMAN	PPP2R1A	-0.0583355	-2.54168	0.0132864	0.0899271
sp|Q14678|KANK1_HUMAN	KANK1	0.107361	2.54074	0.0133188	0.0899797
sp|Q03167|TGBR3_HUMAN	TGFBR3	0.146491	2.54048	0.013328	0.089992
sp|P25786|PSA1_HUMAN	PSMA1	0.0786318	2.53986	0.0133496	0.0900423
sp|P78324|SHPS1_HUMAN	SIRPA	-0.12343	-2.53984	0.0133503	0.0900423
sp|Q9Y3I0|RTCB_HUMAN	RTCB	0.0498481	2.53891	0.0133827	0.0902104
sp|Q5MNZ6|WIPI3_HUMAN	WDR45B	0.103802	2.53823	0.0134063	0.0903199
sp|P42773|CDN2C_HUMAN	CDKN2C	0.129979	2.53691	0.0134525	0.0903372
sp|Q14839|CHD4_HUMAN	CHD4	0.0859042	2.53676	0.0134579	0.0903372
sp|Q504Y0-3|S39AC-3_HUMAN	SLC39A12	0.198318	2.53681	0.0134562	0.0903372
sp|Q8N3F0|MTURN_HUMAN	MTURN	0.123824	2.53717	0.0134434	0.0903372
sp|Q8WX92|NELFB_HUMAN	NELFB	0.105488	2.53752	0.0134313	0.0903372
sp|Q99496|RING2_HUMAN	RNF2	0.11924	2.53698	0.0134502	0.0903372
sp|Q9BX66|SRBS1_HUMAN	SORBS1	0.130709	2.5366	0.0134635	0.0903372
tr|C9IZ88|C9IZ88_HUMAN	CTNNA2	0.130386	2.53646	0.0134684	0.0903372
sp|Q68EM7|RHG17_HUMAN	ARHGAP17	0.114995	2.53592	0.0134874	0.0903647
sp|Q9NT62|ATG3_HUMAN	ATG3	0.079639	2.53607	0.0134822	0.0903647
tr|A0A0D9SFQ7|A0A0D9SFQ7_HUMAN	STXBP1	-0.12708	-2.5348	0.0135267	0.090578
sp|Q9BSJ2|GCP2_HUMAN	TUBGCP2	0.0578289	2.53431	0.0135439	0.0906437
sp|P11532|DMD_HUMAN	DMD	0.0723797	2.53382	0.0135613	0.0906943
sp|P55263|ADK_HUMAN	ADK	0.103272	2.53368	0.0135664	0.0906943
sp|Q96DY7|MTBP_HUMAN	MTBP	-0.240187	-2.53338	0.0135768	0.0907138
sp|P50542|PEX5_HUMAN	PEX5	0.068656	2.53278	0.0135982	0.0908064
sp|P07339|CATD_HUMAN	CTSD	0.090735	2.53232	0.0136144	0.0908151
sp|Q8IY21|DDX60_HUMAN	DDX60	0.157648	2.53252	0.0136073	0.0908151
tr|C9J6P4|C9J6P4_HUMAN	ZC3HAV1	0.142683	2.53197	0.0136269	0.0908485
sp|Q15788|NCOA1_HUMAN	NCOA1	0.0850226	2.5314	0.0136471	0.0909334
sp|P15882-2|CHIN-2_HUMAN	CHN1	-0.0698739	-2.52989	0.0137008	0.0912407
sp|P50570-3|DYN2-3_HUMAN	DNM2	-0.0605273	-2.52955	0.0137129	0.0912715
sp|Q05519|SRS11_HUMAN	SRSF11	0.0828213	2.52933	0.0137207	0.0912734
sp|Q14194|DPYL1_HUMAN	CRMP1	-0.0589823	-2.52874	0.0137419	0.0912869
sp|Q96P48|ARAP1_HUMAN	ARAP1	0.103289	2.52887	0.0137373	0.0912869
tr|E5RIG2|E5RIG2_HUMAN	CSMD1	-0.0654069	-2.52864	0.0137453	0.0912869
sp|Q9GZM8|NDEL1_HUMAN	NDEL1	-0.0783945	-2.528	0.0137685	0.0913911
sp|P25788|PSA3_HUMAN	PSMA3	0.06369	2.52773	0.0137779	0.0913954
sp|Q9Y4G8|RPGF2_HUMAN	RAPGEF2	-0.0781386	-2.52756	0.0137842	0.0913954
sp|Q9BTX1|NDC1_HUMAN	NDC1	0.110303	2.52731	0.013793	0.0914037
sp|Q14914|PTGR1_HUMAN	PTGR1	0.181262	2.52604	0.0138387	0.0916571
sp|Q9BUE6|ISCA1_HUMAN	ISCA1	-0.126721	-2.52513	0.0138714	0.0917384
sp|Q9UBC2-4|EP15R-4_HUMAN	EPS15L1	-0.0472755	-2.52507	0.0138737	0.0917384
tr|A0A0D9SF30|A0A0D9SF30_HUMAN	NCAM1	-0.100849	-2.52537	0.013863	0.0917384
sp|Q96PY6|NEK1_HUMAN	NEK1	0.0714325	2.52421	0.0139047	0.0918935
sp|Q08357|S20A2_HUMAN	SLC20A2	0.127876	2.52396	0.0139136	0.0919024
sp|P49758-12|RGS6-12_HUMAN	RGS6	-0.132808	-2.52365	0.0139248	0.0919263
sp|Q8N4F7|RN175_HUMAN	RNF175	-0.166689	-2.52323	0.0139401	0.0919772
sp|Q8N4H5|TOM5_HUMAN	TOMM5	-0.0847801	-2.5228	0.0139557	0.0920305
sp|Q15084|PDIA6_HUMAN	PDIA6	0.064387	2.52212	0.0139802	0.0920921
sp|Q96N67|DOCK7_HUMAN	DOCK7	0.0564109	2.52224	0.0139761	0.0920921
sp|Q13642-4|FHL1-4_HUMAN	FHL1	0.1719	2.52066	0.0140333	0.0923416
sp|Q13642-5|FHL1-5_HUMAN	FHL1	0.1719	2.52066	0.0140333	0.0923416
sp|Q6DN03|H2B2C_HUMAN	HIST2H2BC	0.222677	2.52042	0.0140422	0.0923499
sp|Q9BY11|PACN1_HUMAN	PACSIN1	-0.113703	-2.51955	0.0140741	0.0925095
sp|O14744|ANM5_HUMAN	PRMT5	0.0549112	2.5174	0.0141528	0.0925492
sp|P01213|PDYN_HUMAN	PDYN	0.437455	2.51804	0.0141293	0.0925492
sp|P13637-3|AT1A3-3_HUMAN	ATP1A3	-0.0716305	-2.51689	0.0141715	0.0925492
sp|P26583|HMGB2_HUMAN	HMGB2	0.166748	2.51757	0.0141466	0.0925492
sp|P49427|UB2R1_HUMAN	CDC34	-0.0756818	-2.51844	0.0141147	0.0925492
sp|Q8IYA7|MKX_HUMAN	MKX	0.3305	2.51868	0.0141059	0.0925492
sp|Q8N461|FXL16_HUMAN	FBXL16	-0.111184	-2.51793	0.0141333	0.0925492
sp|Q96JJ3|ELMO2_HUMAN	ELMO2	0.0975811	2.51716	0.0141617	0.0925492
sp|Q9NQR7|CC177_HUMAN	CCDC177	-0.121071	-2.51717	0.0141612	0.0925492
sp|Q9UHX1-3|PUF60-3_HUMAN	PUF60	0.0762644	2.51756	0.0141466	0.0925492
sp|Q9Y617|SERC_HUMAN	PSAT1	0.194477	2.51709	0.014164	0.0925492
tr|A0A2R8YGD3|A0A2R8YGD3_HUMAN	RAPGEF2	-0.0758487	-2.5176	0.0141454	0.0925492
sp|P00533|EGFR_HUMAN	EGFR	0.136364	2.51623	0.0141957	0.0925577
sp|P0DPH7-2|TBA3C-2_HUMAN	TUBA3C	-0.0647405	-2.51629	0.0141935	0.0925577
sp|Q5T9C2|F102A_HUMAN	FAM102A	0.0803635	2.51659	0.0141825	0.0925577
sp|Q969G6|RIFK_HUMAN	RFK	-0.102532	-2.51561	0.0142187	0.0926082
sp|Q96BH1|RNF25_HUMAN	RNF25	-0.071616	-2.51571	0.0142148	0.0926082
sp|Q96JX3|SRAC1_HUMAN	SERAC1	-0.0793947	-2.51451	0.0142591	0.0928217
sp|Q99536|VAT1_HUMAN	VAT1	0.180566	2.51385	0.0142836	0.0929313
sp|P26639|SYTC_HUMAN	TARS	0.0803247	2.51338	0.0143009	0.0929646
sp|Q9UIJ7|KAD3_HUMAN	AK3	0.129932	2.5133	0.014304	0.0929646
sp|Q8TF44|C2C4C_HUMAN	C2CD4C	-0.159556	-2.51264	0.0143285	0.0930739
sp|P41271|NBL1_HUMAN	NBL1	-0.273939	-2.51171	0.014363	0.0931344
sp|P49619-3|DGKG-3_HUMAN	DGKG	0.123582	2.51156	0.0143685	0.0931344
sp|Q9NR82|KCNQ5_HUMAN	KCNQ5	-0.0980836	-2.51218	0.0143455	0.0931344
sp|Q9NVS9|PNPO_HUMAN	PNPO	0.0868543	2.51166	0.0143647	0.0931344
sp|O14646|CHD1_HUMAN	CHD1	0.0922436	2.51087	0.0143941	0.0931822
sp|Q14289|FAK2_HUMAN	PTK2B	-0.0968595	-2.51098	0.0143902	0.0931822
sp|Q8IXL7-2|MSRB3-2_HUMAN	MSRB3	0.173688	2.51075	0.0143989	0.0931822
sp|P19634|SL9A1_HUMAN	SLC9A1	-0.101148	-2.51018	0.0144198	0.0932681
sp|P68363|TBA1B_HUMAN	TUBA1B	-0.0681481	-2.50954	0.0144438	0.0933738
sp|Q969S2|NEIL2_HUMAN	NEIL2	0.225552	2.50838	0.0144873	0.0936047
sp|Q9BZ67|FRMD8_HUMAN	FRMD8	0.116414	2.50791	0.014505	0.0936695
tr|A0A0D9SER5|A0A0D9SER5_HUMAN	CDK11B	0.0762248	2.5075	0.0145205	0.0937197
sp|Q96FW1|OTUB1_HUMAN	OTUB1	-0.0673274	-2.50708	0.0145363	0.0937631
tr|A0A0U1RR79|A0A0U1RR79_HUMAN	QARS	0.224676	2.50691	0.0145427	0.0937631
sp|Q15629|TRAM1_HUMAN	TRAM1	0.165304	2.50592	0.01458	0.0939538
sp|O95848|NUD14_HUMAN	NUDT14	-0.129486	-2.50508	0.0146114	0.0939571
sp|P12814|ACTN1_HUMAN	ACTN1	-0.115451	-2.50522	0.0146063	0.0939571
sp|Q8TD19|NEK9_HUMAN	NEK9	0.124655	2.50554	0.0145943	0.0939571
sp|Q9UJV8|PURG_HUMAN	PURG	-0.0995468	-2.50517	0.014608	0.0939571
sp|O15540|FABP7_HUMAN	FABP7	0.202557	2.50433	0.0146397	0.0939832
sp|Q86WC4|OSTM1_HUMAN	OSTM1	0.0836362	2.50474	0.0146246	0.0939832
sp|Q9UBP4|DKK3_HUMAN	DKK3	0.138989	2.50435	0.0146393	0.0939832
tr|A0A2R8Y7R5|A0A2R8Y7R5_HUMAN	SAMHD1	0.154099	2.50416	0.0146464	0.0939832
sp|A2RUS2|DEND3_HUMAN	DENND3	0.167447	2.50302	0.0146895	0.0941104
sp|P21964|COMT_HUMAN	COMT	0.156205	2.50323	0.0146814	0.0941104
sp|Q96DZ1|ERLEC_HUMAN	ERLEC1	-0.064871	-2.50306	0.0146879	0.0941104
sp|P37235|HPCL1_HUMAN	HPCAL1	-0.127263	-2.50274	0.0147002	0.0941293
sp|Q13643|FHL3_HUMAN	FHL3	0.11288	2.50137	0.0147524	0.0943648
tr|D6RAL0|D6RAL0_HUMAN	ABLIM2	-0.135866	-2.50136	0.0147525	0.0943648
sp|Q9H0Q0|FA49A_HUMAN	FAM49A	-0.0530141	-2.50088	0.0147709	0.0944326
sp|O14640-2|DVL1-2_HUMAN	DVL1	0.0600672	2.49999	0.0148051	0.094552
sp|Q08345|DDR1_HUMAN	DDR1	0.119139	2.50004	0.0148029	0.094552
sp|Q13547|HDAC1_HUMAN	HDAC1	0.0997471	2.49813	0.0148764	0.0949483
tr|A0A0D9SFE4|A0A0D9SFE4_HUMAN	DNM1	-0.0850002	-2.49796	0.0148828	0.0949483
sp|P30485|1B47_HUMAN	HLA-B	0.212312	2.49735	0.0149061	0.0950469
sp|Q86VX2|COMD7_HUMAN	COMMD7	0.119598	2.49659	0.0149354	0.095184
sp|Q7Z4S6-4|KI21A-4_HUMAN	KIF21A	-0.0625608	-2.49588	0.0149628	0.0953082
sp|P50570-2|DYN2-2_HUMAN	DNM2	-0.0550662	-2.4952	0.0149893	0.0953612
sp|Q15042|RB3GP_HUMAN	RAB3GAP1	-0.0533191	-2.49518	0.0149901	0.0953612
sp|Q16539-2|MK14-2_HUMAN	MAPK14	0.147553	2.49491	0.0150004	0.0953612
sp|Q8NFJ9|BBS1_HUMAN	BBS1	0.0890571	2.49485	0.0150025	0.0953612
sp|O96005|CLPT1_HUMAN	CLPTM1	-0.0683508	-2.4936	0.0150513	0.0956214
sp|O43295|SRGP3_HUMAN	SRGAP3	-0.0699422	-2.493	0.0150745	0.095669
sp|Q13367|AP3B2_HUMAN	AP3B2	-0.0981516	-2.49314	0.0150691	0.095669
sp|Q96NT1|NP1L5_HUMAN	NAP1L5	-0.10971	-2.49266	0.0150876	0.095702
sp|P05023|AT1A1_HUMAN	ATP1A1	-0.0905934	-2.49207	0.0151105	0.0957971
sp|Q9NRX4|PHP14_HUMAN	PHPT1	0.118197	2.49141	0.0151362	0.09591
sp|P41586-3|PACR-3_HUMAN	ADCYAP1R1	0.168456	2.49102	0.0151514	0.0959564
sp|Q6UW02|CP20A_HUMAN	CYP20A1	0.198282	2.49077	0.0151612	0.0959681
sp|Q9ULL8|SHRM4_HUMAN	SHROOM4	0.158194	2.49001	0.0151909	0.096106
sp|P05114|HMGN1_HUMAN	HMGN1	0.158974	2.4893	0.0152189	0.096221
sp|Q9BZF3-3|OSBL6-3_HUMAN	OSBPL6	-0.0828872	-2.48914	0.0152249	0.096221
sp|O00534|VMA5A_HUMAN	VWA5A	0.225276	2.48876	0.0152398	0.0962465
sp|P98171|RHG04_HUMAN	ARHGAP4	0.155574	2.48864	0.0152448	0.0962465
sp|P22676|CALB2_HUMAN	CALB2	0.230669	2.4883	0.0152582	0.0962813
sp|Q6ZPD9|D19L3_HUMAN	DPY19L3	0.148849	2.48806	0.0152673	0.0962889
sp|Q5JTV8|TOIP1_HUMAN	TOR1AIP1	0.0844553	2.48756	0.0152872	0.0963643
sp|Q9BUT1|BDH2_HUMAN	BDH2	0.237716	2.48723	0.0153001	0.0963953
sp|Q15293|RCN1_HUMAN	RCN1	0.128668	2.48686	0.0153148	0.0964378
sp|O95466-2|FMNL1-2_HUMAN	FMNL1	0.0880671	2.48629	0.015337	0.0964779
sp|Q9UHA4|LTOR3_HUMAN	LAMTOR3	0.101853	2.48635	0.015335	0.0964779
sp|Q86UW7|CAPS2_HUMAN	CADPS2	-0.114679	-2.48562	0.0153635	0.0965946
sp|Q13425|SNTB2_HUMAN	SNTB2	0.0938589	2.48521	0.0153801	0.0966131
sp|Q9HCM4|E41L5_HUMAN	EPB41L5	0.168798	2.48515	0.0153824	0.0966131
tr|H0YJP2|H0YJP2_HUMAN	KTN1	0.085151	2.48492	0.0153915	0.0966205
sp|P07384|CAN1_HUMAN	CAPN1	0.0922252	2.48417	0.0154209	0.0966558
sp|P48634|PRC2A_HUMAN	PRRC2A	-0.06586	-2.48435	0.0154138	0.0966558
sp|Q6P1N0|C2D1A_HUMAN	CC2D1A	0.0485304	2.48417	0.015421	0.0966558
sp|Q9C026-4|TRIM9-4_HUMAN	TRIM9	-0.0588621	-2.48389	0.0154323	0.0966665
tr|D6RBT3|D6RBT3_HUMAN	NDUFS6	-0.116538	-2.48373	0.0154386	0.0966665
sp|Q71U36|TBA1A_HUMAN	TUBA1A	-0.0682258	-2.48328	0.0154564	0.0967228
sp|Q9UK39|NOCT_HUMAN	NOCT	-0.128223	-2.4831	0.0154635	0.0967228
sp|Q86Y56|DAAF5_HUMAN	DNAAF5	0.149987	2.48214	0.0155017	0.0968441
sp|Q9BR61|ACBD6_HUMAN	ACBD6	-0.0629411	-2.48236	0.0154932	0.0968441
tr|E9PIX7|E9PIX7_HUMAN	NEK5	0.375554	2.48201	0.0155068	0.0968441
sp|Q9NZC3|GDE1_HUMAN	GDE1	-0.101802	-2.48179	0.0155155	0.0968485
sp|P11509|CP2A6_HUMAN	CYP2A6	0.234013	2.48141	0.0155307	0.0968934
sp|O75817|POP7_HUMAN	POP7	0.147239	2.48039	0.0155718	0.0969042
sp|P13637|AT1A3_HUMAN	ATP1A3	-0.0704069	-2.48	0.0155873	0.0969042
sp|P19367|HXK1_HUMAN	HK1	-0.0880787	-2.47957	0.0156046	0.0969042
sp|P50454|SERPH_HUMAN	SERPINH1	0.224178	2.47974	0.0155976	0.0969042
sp|Q12926|ELAV2_HUMAN	ELAVL2	-0.115462	-2.47921	0.0156189	0.0969042
sp|Q15397|PUM3_HUMAN	PUM3	0.119034	2.47918	0.0156202	0.0969042
sp|Q5T9L3|WLS_HUMAN	WLS	0.136378	2.47954	0.0156058	0.0969042
sp|Q969X6|UTP4_HUMAN	UTP4	0.116632	2.48075	0.0155572	0.0969042
sp|Q96GR2|ACBG1_HUMAN	ACSBG1	0.11459	2.48058	0.015564	0.0969042
tr|A0A0A0MSH6|A0A0A0MSH6_HUMAN	LDAH	0.120319	2.48104	0.0155455	0.0969042
tr|G3V1L9|G3V1L9_HUMAN	TJP1	0.11284	2.47998	0.0155882	0.0969042
sp|Q8TES7|FBF1_HUMAN	FBF1	0.140674	2.47874	0.0156376	0.0969564
tr|K7ERB2|K7ERB2_HUMAN	AP2B1	-0.0949089	-2.47857	0.0156446	0.0969564
sp|Q8N1F7|NUP93_HUMAN	NUP93	0.0621523	2.47801	0.0156669	0.0970454
sp|Q9H4A4|AMPB_HUMAN	RNPEP	0.129034	2.47738	0.0156926	0.0971549
sp|P53350|PLK1_HUMAN	PLK1	0.220308	2.47683	0.0157145	0.0972411
sp|P05023-2|AT1A1-2_HUMAN	ATP1A1	-0.0931484	-2.47575	0.0157583	0.0972723
sp|Q03519|TAP2_HUMAN	TAP2	0.163659	2.47572	0.0157596	0.0972723
sp|Q8IWB9|TEX2_HUMAN	TEX2	0.0640379	2.4761	0.0157442	0.0972723
sp|Q9H9R9|DBND1_HUMAN	DBNDD1	-0.150757	-2.47619	0.0157406	0.0972723
sp|Q9P2J5|SYLC_HUMAN	LARS	-0.0597605	-2.47634	0.0157345	0.0972723
sp|Q6P1A2|MBOA5_HUMAN	LPCAT3	0.130345	2.47548	0.0157691	0.0972818
sp|Q86UV5|UBP48_HUMAN	USP48	0.0779849	2.47493	0.0157915	0.0973302
sp|Q8NHU6|TDRD7_HUMAN	TDRD7	0.105426	2.4745	0.015809	0.0973302
sp|Q9NSK0|KLC4_HUMAN	KLC4	0.0669097	2.47476	0.0157984	0.0973302
sp|Q9ULL4|PLXB3_HUMAN	PLXNB3	0.145685	2.47458	0.0158056	0.0973302
sp|Q5VUB5|F1711_HUMAN	FAM171A1	0.0619484	2.47429	0.0158175	0.0973326
sp|Q14344|GNA13_HUMAN	GNA13	0.153889	2.47397	0.0158304	0.0973546
tr|A0A0A0MTJ2|A0A0A0MTJ2_HUMAN	SPOCK3	0.190722	2.47381	0.0158371	0.0973546
sp|Q9NS86|LANC2_HUMAN	LANCL2	-0.0937096	-2.47234	0.0158966	0.0976711
sp|P61266|STX1B_HUMAN	STX1B	-0.130216	-2.47148	0.0159317	0.0978374
sp|P0DPH7|TBA3C_HUMAN	TUBA3C	-0.0652729	-2.47055	0.0159699	0.0980227
sp|Q9NP79|VTA1_HUMAN	VTA1	-0.0853312	-2.46951	0.0160126	0.0982347
sp|Q13972-3|RGRF1-3_HUMAN	RASGRF1	-0.116909	-2.46778	0.0160834	0.0983713
sp|Q13972|RGRF1_HUMAN	RASGRF1	-0.116909	-2.46778	0.0160834	0.0983713
sp|Q70YC5|ZN365_HUMAN	ZNF365	-0.114317	-2.4685	0.0160541	0.0983713
sp|Q96DE0|NUD16_HUMAN	NUDT16	0.0972418	2.46783	0.0160815	0.0983713
sp|Q9NXV6|CARF_HUMAN	CDKN2AIP	0.130934	2.46863	0.0160488	0.0983713
tr|Q5JXH8|Q5JXH8_HUMAN	FHL1	0.171126	2.46792	0.0160777	0.0983713
sp|Q9Y383|LC7L2_HUMAN	LUC7L2	0.0883959	2.46751	0.0160947	0.0983907
sp|P13498|CY24A_HUMAN	CYBA	0.223352	2.46725	0.0161054	0.0984066
sp|Q7Z4I7|LIMS2_HUMAN	LIMS2	0.155834	2.46705	0.0161137	0.0984076
sp|O00625|PIR_HUMAN	PIR	0.221255	2.46644	0.0161387	0.0985107
tr|A0A1B0GWA6|A0A1B0GWA6_HUMAN	SCN2A	-0.0914014	-2.46613	0.0161517	0.0985408
sp|Q8N9F7|GDPD1_HUMAN	GDPD1	-0.073379	-2.46565	0.0161714	0.0985612
sp|Q9Y4F5|C170B_HUMAN	CEP170B	-0.0722933	-2.46546	0.0161794	0.0985612
tr|A0A087WYX1|A0A087WYX1_HUMAN	PRMT2	0.214015	2.46582	0.0161646	0.0985612
sp|P60953-1|CDC42-1_HUMAN	CDC42	-0.114149	-2.46504	0.0161968	0.0985668
sp|Q5TZA2|CROCC_HUMAN	CROCC	0.0885008	2.46465	0.0162128	0.0985668
sp|Q6NZY4|ZCHC8_HUMAN	ZCCHC8	0.137519	2.46472	0.0162102	0.0985668
[truncated: 10,150 more rows]
