# Supplementary figures and images for: Proteomic Signaling of Dual-Specificity Phosphatase 4 (DUSP4) in Alzheimer’s Disease
Source: MDPI journal article supplement (doi:10.3390/biom14010066), 2024-01-03

Female

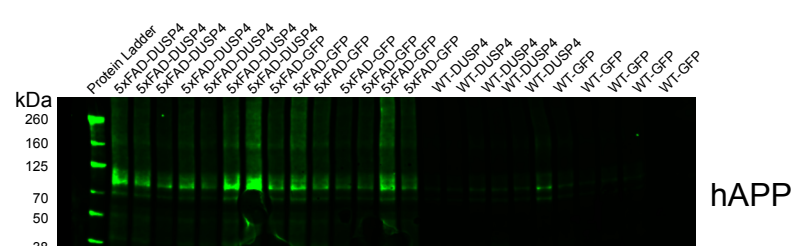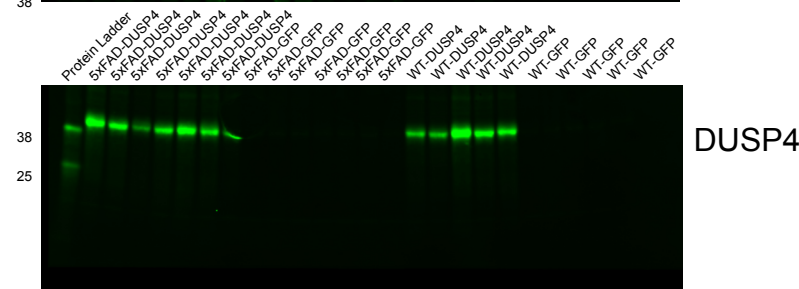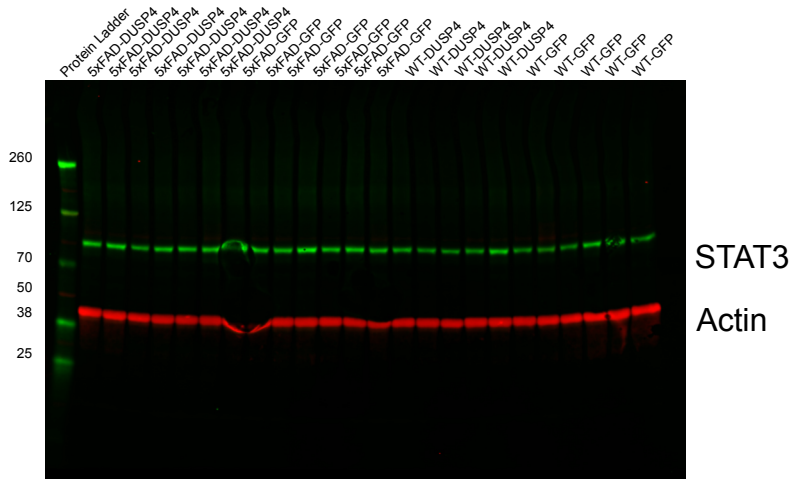

Supplement: s1 [file s1]
